# Supplementary material for: Significance of Visible Non-Invasive Risk Attributes for the Initial Prediction of Heart Disease Using Different Machine Learning Techniques
Source: Hindawi journal article supplement (doi:10.1155/2022/9580896), 2022-02-21
Supplement: f1 [file 9580896.f1.pdf]

| Age | Gender | Height | Weight | Systolic BP | Diastolic BP | Hereditary |
|-----|--------|--------|--------|-------------|--------------|------------|
| 57  | Female | 140    | 52     | 92          | 68           | Yes        |
| 63  | Female | 152    | 55     | 120         | 75           | No         |
| 70  | Male   | 155    | 56     | 108         | 78           | Yes        |
| 60  | Female | 145    | 60     | 102         | 84           | Yes        |
| 57  | Male   | 146    | 60     | 101         | 80           | Yes        |
| 50  | Female | 165    | 61     | 101         | 81           | No         |
| 57  | Male   | 148    | 80     | 142         | 90           | Yes        |
| 57  | Female | 151    | 55     | 135         | 71           | Yes        |
| 70  | Male   | 145    | 50     | 98          | 66           | Yes        |
| 48  | Female | 149    | 53     | 121         | 80           | No         |
| 39  | Female | 145    | 54     | 131         | 78           | Yes        |
| 60  | Female | 148    | 59     | 101         | 95           | No         |
| 42  | Female | 152    | 76     | 135         | 88           | Yes        |
| 39  | Male   | 157    | 71     | 148         | 94           | No         |
| 63  | Female | 156    | 68     | 145         | 72           | Yes        |
| 52  | Male   | 150    | 79     | 109         | 94           | Yes        |
| 55  | Female | 152    | 85     | 152         | 67           | Yes        |
| 53  | Male   | 179    | 88     | 108         | 95           | No         |
| 57  | Female | 152    | 87     | 128         | 87           | Yes        |
| 58  | Female | 152    | 84     | 121         | 80           | Yes        |
| 63  | Female | 152    | 82     | 111         | 84           | No         |
| 62  | Female | 145    | 65     | 105         | 71           | Yes        |
| 70  | Female | 156    | 68     | 122         | 95           | Yes        |
| 44  | Male   | 176    | 76     | 149         | 78           | No         |
| 54  | Female | 180    | 87     | 110         | 75           | Yes        |
| 63  | Female | 160    | 90     | 135         | 77           | Yes        |
| 64  | Female | 150    | 79     | 150         | 69           | No         |
| 60  | Female | 152    | 78     | 145         | 81           | Yes        |
| 63  | Female | 145    | 79     | 147         | 85           | Yes        |
| 53  | Male   | 165    | 100    | 145         | 95           | Yes        |
| 62  | Male   | 176    | 99     | 145         | 71           | Yes        |
| 45  | Male   | 160    | 87     | 152         | 88           | No         |
| 54  | Female | 165    | 90     | 121         | 81           | Yes        |
| 42  | Male   | 153    | 83     | 111         | 75           | Yes        |
| 46  | Male   | 153    | 76     | 109         | 78           | No         |
| 42  | Male   | 155    | 80     | 102         | 68           | No         |
| 45  | Female | 156    | 76     | 101         | 81           | Yes        |
| 55  | Female | 157    | 68     | 109         | 90           | Yes        |
| 52  | Male   | 156    | 64     | 108         | 80           | Yes        |
| 67  | Male   | 157    | 67     | 121         | 69           | No         |
| 58  | Male   | 158    | 63     | 118         | 88           | No         |
| 57  | Male   | 159    | 59     | 123         | 68           | Yes        |
| 64  | Male   | 161    | 61     | 132         | 73           | No         |
| 61  | Male   | 165    | 76     | 134         | 85           | No         |
| 50  | Female | 166    | 72     | 151         | 88           | No         |

|    |        |     |    |     |    |     |
|----|--------|-----|----|-----|----|-----|
| 43 | Female | 176 | 89 | 120 | 97 | Yes |
| 63 | Female | 171 | 66 | 134 | 78 | No  |
| 41 | Female | 172 | 88 | 111 | 85 | No  |
| 48 | Male   | 143 | 68 | 108 | 66 | Yes |
| 66 | Female | 147 | 76 | 135 | 87 | Yes |
| 45 | Female | 149 | 59 | 110 | 75 | Yes |
| 76 | Female | 156 | 78 | 112 | 78 | Yes |
| 53 | Male   | 155 | 77 | 110 | 88 | No  |
| 48 | Male   | 154 | 67 | 95  | 80 | Yes |
| 52 | Female | 152 | 76 | 142 | 91 | No  |
| 57 | Female | 151 | 68 | 98  | 89 | No  |
| 41 | Male   | 153 | 69 | 132 | 78 | Yes |
| 58 | Female | 158 | 64 | 121 | 82 | No  |
| 37 | Male   | 179 | 70 | 102 | 81 | No  |
| 58 | Male   | 180 | 70 | 107 | 88 | Yes |
| 64 | Male   | 180 | 89 | 101 | 75 | Yes |
| 66 | Female | 175 | 70 | 101 | 95 | Yes |
| 42 | Male   | 176 | 79 | 120 | 74 | Yes |
| 55 | Female | 167 | 70 | 125 | 92 | Yes |
| 63 | Female | 178 | 79 | 110 | 83 | No  |
| 58 | Female | 179 | 81 | 134 | 88 | Yes |
| 45 | Male   | 174 | 70 | 148 | 95 | Yes |
| 35 | Male   | 167 | 70 | 141 | 92 | Yes |
| 67 | Male   | 168 | 70 | 129 | 80 | Yes |
| 58 | Female | 156 | 70 | 130 | 78 | Yes |
| 41 | Female | 159 | 73 | 145 | 87 | No  |
| 44 | Male   | 180 | 83 | 134 | 81 | Yes |
| 41 | Male   | 174 | 84 | 134 | 95 | Yes |
| 62 | Female | 173 | 82 | 128 | 71 | Yes |
| 53 | Female | 156 | 76 | 132 | 72 | No  |
| 62 | Female | 154 | 79 | 120 | 80 | Yes |
| 62 | Male   | 154 | 78 | 120 | 78 | Yes |
| 66 | Male   | 157 | 80 | 101 | 95 | Yes |
| 51 | Male   | 159 | 86 | 142 | 88 | No  |
| 70 | Male   | 140 | 67 | 120 | 94 | Yes |
| 46 | Male   | 152 | 66 | 140 | 88 | Yes |
| 51 | Male   | 155 | 63 | 120 | 88 | Yes |
| 39 | Male   | 145 | 58 | 104 | 82 | Yes |
| 57 | Male   | 146 | 56 | 142 | 71 | No  |
| 51 | Male   | 165 | 67 | 121 | 92 | Yes |
| 66 | Male   | 148 | 58 | 99  | 84 | Yes |
| 47 | Male   | 153 | 61 | 118 | 81 | Yes |
| 57 | Male   | 154 | 63 | 120 | 88 | Yes |
| 52 | Female | 165 | 67 | 148 | 94 | No  |
| 53 | Female | 180 | 78 | 119 | 75 | Yes |
| 60 | Female | 150 | 79 | 101 | 73 | Yes |
| 71 | Female | 145 | 92 | 139 | 81 | Yes |

|    |        |     |    |     |    |     |
|----|--------|-----|----|-----|----|-----|
| 68 | Female | 141 | 54 | 118 | 88 | Yes |
| 64 | Female | 165 | 55 | 105 | 78 | Yes |
| 53 | Male   | 155 | 59 | 121 | 81 | Yes |
| 34 | Male   | 156 | 61 | 149 | 85 | Yes |
| 59 | Male   | 155 | 61 | 114 | 71 | Yes |
| 54 | Male   | 176 | 89 | 114 | 92 | Yes |
| 59 | Male   | 178 | 89 | 101 | 75 | Yes |
| 60 | Male   | 179 | 90 | 145 | 89 | Yes |
| 52 | Female | 145 | 60 | 135 | 92 | No  |
| 63 | Female | 146 | 66 | 110 | 66 | No  |
| 59 | Female | 165 | 64 | 104 | 77 | Yes |
| 74 | Male   | 155 | 67 | 119 | 90 | Yes |
| 65 | Female | 152 | 61 | 152 | 89 | Yes |
| 52 | Male   | 150 | 62 | 117 | 84 | No  |
| 54 | Male   | 151 | 85 | 146 | 88 | No  |
| 49 | Male   | 145 | 62 | 138 | 82 | Yes |
| 40 | Male   | 149 | 82 | 101 | 66 | Yes |
| 53 | Female | 145 | 75 | 117 | 89 | Yes |
| 52 | Male   | 148 | 72 | 123 | 78 | No  |
| 62 | Male   | 152 | 70 | 135 | 82 | No  |
| 69 | Male   | 157 | 67 | 101 | 92 | Yes |
| 49 | Male   | 156 | 66 | 107 | 79 | Yes |
| 74 | Female | 145 | 79 | 123 | 80 | Yes |
| 61 | Male   | 160 | 89 | 148 | 86 | No  |
| 59 | Male   | 165 | 90 | 118 | 65 | No  |
| 60 | Male   | 180 | 65 | 132 | 71 | Yes |
| 67 | Female | 162 | 94 | 109 | 90 | Yes |
| 56 | Male   | 178 | 65 | 142 | 95 | No  |
| 49 | Female | 145 | 49 | 142 | 65 | Yes |
| 65 | Female | 156 | 65 | 104 | 80 | Yes |
| 46 | Male   | 176 | 65 | 105 | 85 | Yes |
| 44 | Female | 150 | 88 | 98  | 85 | No  |
| 69 | Male   | 179 | 65 | 121 | 75 | No  |
| 64 | Female | 155 | 91 | 145 | 76 | Yes |
| 41 | Male   | 165 | 65 | 149 | 88 | Yes |
| 51 | Female | 163 | 88 | 118 | 77 | No  |
| 64 | Male   | 165 | 65 | 152 | 68 | Yes |
| 59 | Female | 160 | 81 | 101 | 69 | Yes |
| 62 | Female | 178 | 65 | 132 | 71 | Yes |
| 54 | Male   | 165 | 85 | 152 | 83 | No  |
| 64 | Male   | 153 | 80 | 100 | 88 | No  |
| 62 | Female | 153 | 80 | 120 | 95 | Yes |
| 62 | Female | 155 | 65 | 151 | 92 | Yes |
| 42 | Male   | 156 | 80 | 121 | 80 | No  |
| 56 | Male   | 157 | 80 | 99  | 78 | Yes |
| 54 | Male   | 156 | 54 | 95  | 89 | Yes |
| 57 | Male   | 157 | 80 | 111 | 81 | Yes |

|    |        |     |    |     |    |     |
|----|--------|-----|----|-----|----|-----|
| 63 | Female | 158 | 56 | 108 | 95 | No  |
| 44 | Female | 159 | 67 | 121 | 71 | Yes |
| 54 | Male   | 161 | 80 | 102 | 74 | Yes |
| 57 | Male   | 165 | 68 | 152 | 80 | Yes |
| 54 | Male   | 166 | 80 | 121 | 78 | Yes |
| 51 | Male   | 165 | 73 | 142 | 95 | Yes |
| 39 | Male   | 150 | 77 | 131 | 88 | No  |
| 66 | Female | 150 | 79 | 148 | 80 | Yes |
| 59 | Male   | 143 | 61 | 142 | 72 | Yes |
| 57 | Male   | 147 | 85 | 129 | 94 | Yes |
| 48 | Female | 149 | 54 | 108 | 87 | Yes |
| 65 | Female | 156 | 50 | 135 | 95 | Yes |
| 64 | Male   | 155 | 85 | 120 | 87 | Yes |
| 64 | Male   | 154 | 85 | 140 | 80 | Yes |
| 55 | Female | 152 | 85 | 150 | 84 | No  |
| 51 | Female | 151 | 51 | 112 | 71 | No  |
| 60 | Female | 153 | 85 | 142 | 89 | Yes |
| 41 | Female | 158 | 55 | 148 | 78 | No  |
| 58 | Female | 150 | 92 | 114 | 75 | Yes |
| 68 | Female | 160 | 88 | 131 | 77 | Yes |
| 55 | Female | 165 | 82 | 142 | 90 | No  |
| 59 | Male   | 155 | 81 | 151 | 88 | No  |
| 56 | Male   | 176 | 81 | 132 | 85 | No  |
| 41 | Male   | 167 | 55 | 138 | 95 | No  |
| 48 | Male   | 178 | 55 | 101 | 71 | Yes |
| 61 | Male   | 179 | 78 | 110 | 88 | Yes |
| 54 | Male   | 174 | 77 | 108 | 81 | Yes |
| 67 | Female | 167 | 55 | 104 | 75 | Yes |
| 56 | Male   | 168 | 55 | 101 | 78 | Yes |
| 66 | Male   | 156 | 55 | 145 | 68 | No  |
| 50 | Female | 159 | 80 | 110 | 81 | No  |
| 64 | Female | 165 | 80 | 132 | 90 | Yes |
| 64 | Female | 165 | 81 | 132 | 80 | No  |
| 68 | Male   | 173 | 55 | 123 | 69 | Yes |
| 37 | Female | 156 | 85 | 129 | 88 | Yes |
| 63 | Female | 154 | 85 | 118 | 68 | Yes |
| 64 | Female | 154 | 55 | 142 | 73 | No  |
| 44 | Male   | 157 | 55 | 131 | 85 | No  |
| 54 | Female | 159 | 85 | 95  | 88 | Yes |
| 52 | Male   | 140 | 55 | 131 | 97 | Yes |
| 42 | Female | 152 | 85 | 142 | 78 | Yes |
| 51 | Female | 155 | 85 | 138 | 85 | Yes |
| 60 | Female | 145 | 85 | 105 | 66 | Yes |
| 43 | Female | 146 | 58 | 102 | 87 | No  |
| 43 | Female | 165 | 85 | 128 | 75 | No  |
| 59 | Female | 148 | 71 | 143 | 78 | Yes |
| 43 | Female | 153 | 72 | 122 | 88 | Yes |

|    |        |     |     |     |    |     |
|----|--------|-----|-----|-----|----|-----|
| 41 | Male   | 154 | 83  | 104 | 80 | Yes |
| 62 | Female | 165 | 90  | 120 | 91 | Yes |
| 59 | Female | 170 | 87  | 108 | 89 | Yes |
| 66 | Female | 170 | 88  | 144 | 78 | No  |
| 63 | Female | 179 | 83  | 105 | 82 | No  |
| 54 | Male   | 139 | 90  | 124 | 81 | Yes |
| 61 | Female | 165 | 90  | 112 | 88 | Yes |
| 48 | Male   | 167 | 90  | 140 | 75 | Yes |
| 58 | Male   | 156 | 90  | 152 | 95 | Yes |
| 61 | Male   | 155 | 90  | 112 | 74 | Yes |
| 63 | Female | 160 | 90  | 114 | 92 | No  |
| 51 | Male   | 178 | 67  | 118 | 83 | No  |
| 55 | Female | 179 | 87  | 132 | 88 | Yes |
| 58 | Male   | 145 | 120 | 108 | 95 | Yes |
| 57 | Male   | 146 | 67  | 132 | 92 | Yes |
| 64 | Female | 165 | 120 | 145 | 80 | Yes |
| 77 | Male   | 155 | 81  | 149 | 78 | Yes |
| 44 | Male   | 152 | 65  | 99  | 89 | No  |
| 44 | Male   | 150 | 120 | 90  | 81 | No  |
| 53 | Male   | 151 | 120 | 111 | 88 | Yes |
| 69 | Male   | 145 | 60  | 134 | 95 | Yes |
| 62 | Female | 149 | 120 | 104 | 92 | Yes |
| 58 | Male   | 145 | 54  | 149 | 80 | Yes |
| 76 | Female | 148 | 51  | 121 | 78 | Yes |
| 54 | Male   | 152 | 55  | 107 | 89 | No  |
| 57 | Male   | 157 | 51  | 120 | 81 | No  |
| 66 | Female | 156 | 56  | 118 | 95 | Yes |
| 68 | Male   | 170 | 78  | 142 | 71 | Yes |
| 67 | Male   | 180 | 71  | 121 | 98 | Yes |
| 41 | Male   | 179 | 76  | 140 | 80 | Yes |
| 43 | Male   | 180 | 77  | 132 | 78 | Yes |
| 58 | Male   | 174 | 65  | 120 | 95 | No  |
| 51 | Male   | 180 | 67  | 135 | 88 | No  |
| 54 | Male   | 145 | 71  | 123 | 94 | Yes |
| 66 | Female | 156 | 72  | 101 | 72 | Yes |
| 51 | Female | 176 | 77  | 141 | 90 | Yes |
| 70 | Male   | 170 | 79  | 147 | 87 | Yes |
| 67 | Male   | 179 | 75  | 132 | 95 | Yes |
| 54 | Female | 170 | 90  | 147 | 87 | No  |
| 50 | Male   | 155 | 56  | 149 | 80 | No  |
| 47 | Male   | 159 | 74  | 118 | 84 | Yes |
| 55 | Female | 165 | 90  | 147 | 71 | Yes |
| 43 | Male   | 176 | 61  | 120 | 95 | Yes |
| 55 | Male   | 178 | 65  | 120 | 78 | Yes |
| 65 | Female | 165 | 90  | 114 | 75 | Yes |
| 67 | Male   | 153 | 49  | 149 | 77 | No  |
| 35 | Male   | 153 | 49  | 138 | 92 | No  |

|    |        |     |    |     |    |     |
|----|--------|-----|----|-----|----|-----|
| 76 | Female | 155 | 90 | 121 | 88 | Yes |
| 58 | Male   | 156 | 51 | 131 | 85 | Yes |
| 52 | Female | 157 | 90 | 138 | 82 | Yes |
| 60 | Female | 156 | 90 | 120 | 90 | Yes |
| 66 | Male   | 157 | 56 | 121 | 90 | Yes |
| 77 | Female | 158 | 71 | 110 | 84 | No  |
| 56 | Male   | 159 | 77 | 126 | 88 | No  |
| 56 | Male   | 161 | 76 | 121 | 82 | No  |
| 38 | Male   | 167 | 78 | 97  | 77 | No  |
| 65 | Female | 178 | 77 | 123 | 90 | Yes |
| 71 | Female | 179 | 71 | 100 | 88 | No  |
| 57 | Female | 174 | 77 | 127 | 89 | Yes |
| 47 | Male   | 167 | 70 | 109 | 92 | No  |
| 42 | Female | 168 | 73 | 152 | 82 | No  |
| 59 | Male   | 156 | 69 | 118 | 87 | No  |
| 54 | Female | 159 | 66 | 142 | 81 | Yes |
| 50 | Female | 180 | 86 | 99  | 82 | Yes |
| 68 | Female | 174 | 81 | 98  | 95 | Yes |
| 56 | Male   | 173 | 83 | 102 | 98 | Yes |
| 55 | Female | 156 | 69 | 101 | 97 | No  |
| 46 | Male   | 154 | 78 | 100 | 95 | Yes |
| 57 | Female | 154 | 71 | 115 | 98 | Yes |
| 48 | Male   | 157 | 71 | 114 | 91 | No  |
| 45 | Male   | 159 | 67 | 120 | 80 | Yes |
| 34 | Male   | 140 | 68 | 123 | 78 | No  |
| 56 | Male   | 152 | 66 | 132 | 87 | No  |
| 53 | Male   | 155 | 67 | 111 | 90 | No  |
| 52 | Male   | 145 | 60 | 120 | 95 | Yes |
| 41 | Male   | 146 | 66 | 151 | 92 | No  |
| 63 | Male   | 165 | 67 | 142 | 97 | Yes |
| 59 | Female | 148 | 64 | 123 | 90 | Yes |
| 44 | Male   | 153 | 72 | 132 | 97 | Yes |
| 54 | Female | 154 | 73 | 128 | 93 | No  |
| 65 | Female | 165 | 59 | 99  | 91 | Yes |
| 45 | Female | 180 | 81 | 135 | 95 | Yes |
| 64 | Female | 175 | 82 | 124 | 80 | Yes |
| 61 | Female | 160 | 85 | 120 | 85 | Yes |
| 66 | Male   | 139 | 66 | 125 | 88 | Yes |
| 44 | Female | 165 | 80 | 132 | 86 | Yes |
| 60 | Female | 167 | 52 | 125 | 87 | Yes |
| 38 | Male   | 156 | 55 | 128 | 89 | No  |
| 44 | Female | 155 | 56 | 99  | 71 | Yes |
| 43 | Male   | 176 | 60 | 98  | 99 | Yes |
| 48 | Male   | 178 | 60 | 99  | 80 | Yes |
| 35 | Female | 179 | 61 | 99  | 78 | No  |
| 49 | Male   | 145 | 57 | 102 | 95 | Yes |
| 54 | Male   | 146 | 57 | 108 | 88 | Yes |

|    |        |     |     |     |    |           |
|----|--------|-----|-----|-----|----|-----------|
| 66 | Male   | 165 | 58  | 132 | 94 | Yes       |
| 55 | Female | 155 | 70  | 142 | 72 | No        |
| 55 | Male   | 152 | 75  | 145 | 94 | Yes       |
| 48 | Male   | 150 | 79  | 152 | 87 | Yes       |
| 52 | Female | 151 | 83  | 132 | 95 | Yes       |
| 47 | Female | 145 | 52  | 120 | 87 | No        |
| 52 | Female | 149 | 65  | 122 | 80 | Yes       |
| 58 | Male   | 145 | 67  | 118 | 84 | Yes       |
| 45 | Male   | 148 | 60  | 105 | 71 | Yes       |
| 74 | Female | 152 | 67  | 120 | 95 | No        |
| 48 | Male   | 157 | 80  | 123 | 78 | Yes       |
| 41 | Female | 156 | 81  | 126 | 75 | Yes       |
| 54 | Female | 178 | 83  | 127 | 77 | Yes       |
| 51 | Female | 181 | 60  | 128 | 99 | No        |
| 53 | Male   | 160 | 61  | 120 | 88 | Yes       |
| 38 | Male   | 180 | 65  | 123 | 85 | Yes       |
| 60 | Male   | 177 | 59  | 124 | 95 | Yes       |
| 52 | Male   | 149 | 57  | 125 | 90 | No        |
| 41 | Female | 145 | 59  | 124 | 90 | Yes       |
| 49 | Female | 156 | 55  | 120 | 84 | Yes       |
| 43 | Female | 176 | 50  | 90  | 88 | Yes       |
| 56 | Female | 180 | 53  | 93  | 82 | No        |
| 58 | Female | 160 | 54  | 92  | 66 | Yes       |
| 67 | Female | 174 | 59  | 94  | 89 | Yes       |
| 44 | Female | 157 | 76  | 99  | 78 | Yes       |
| 54 | Female | 165 | 71  | 100 | 82 | No        |
| 35 | Female | 165 | 68  | 124 | 92 | Yes       |
| 42 | Female | 176 | 79  | 125 | 79 | Yes       |
| 57 | Female | 140 | 50  | 95  | 80 | Not Known |
| 63 | Female | 152 | 55  | 121 | 86 | Not Known |
| 70 | Female | 169 | 82  | 110 | 65 | Not Known |
| 60 | Female | 145 | 65  | 92  | 80 | Not Known |
| 57 | Male   | 162 | 85  | 111 | 88 | Yes       |
| 52 | Female | 165 | 61  | 108 | 90 | No        |
| 57 | Female | 148 | 72  | 102 | 92 | Yes       |
| 58 | Male   | 172 | 80  | 101 | 98 | Not Known |
| 62 | Male   | 172 | 90  | 101 | 95 | Not Known |
| 41 | Male   | 165 | 70  | 142 | 90 | No        |
| 45 | Female | 172 | 100 | 121 | 85 | No        |
| 46 | Male   | 178 | 65  | 148 | 88 | Yes       |
| 74 | Female | 162 | 85  | 145 | 89 | Not Known |
| 54 | Male   | 144 | 70  | 101 | 75 | No        |
| 62 | Female | 165 | 88  | 108 | 77 | Not Known |
| 63 | Female | 172 | 88  | 132 | 90 | Not Known |
| 60 | Male   | 180 | 100 | 112 | 88 | Yes       |
| 61 | Male   | 155 | 50  | 120 | 89 | Not Known |
| 60 | Female | 172 | 93  | 102 | 92 | Not Known |

|    |        |     |     |     |    |           |
|----|--------|-----|-----|-----|----|-----------|
| 51 | Female | 178 | 81  | 121 | 82 | No        |
| 49 | Male   | 179 | 85  | 120 | 87 | Not Known |
| 61 | Female | 145 | 74  | 119 | 81 | Yes       |
| 43 | Female | 146 | 62  | 123 | 82 | No        |
| 57 | Male   | 165 | 75  | 98  | 95 | Not Known |
| 66 | Female | 177 | 90  | 142 | 88 | Not Known |
| 39 | Female | 152 | 57  | 130 | 97 | Yes       |
| 42 | Male   | 150 | 46  | 132 | 95 | No        |
| 57 | Male   | 175 | 95  | 96  | 98 | Yes       |
| 70 | Female | 145 | 50  | 120 | 91 | No        |
| 48 | Female | 149 | 53  | 115 | 80 | Yes       |
| 39 | Female | 145 | 72  | 135 | 78 | Not Known |
| 60 | Female | 159 | 65  | 98  | 87 | No        |
| 42 | Female | 175 | 85  | 121 | 90 | Yes       |
| 39 | Male   | 157 | 55  | 131 | 95 | No        |
| 63 | Male   | 177 | 75  | 101 | 92 | No        |
| 52 | Female | 178 | 96  | 135 | 97 | No        |
| 55 | Female | 178 | 105 | 148 | 82 | Not Known |
| 53 | Female | 162 | 92  | 145 | 90 | No        |
| 57 | Female | 170 | 92  | 109 | 93 | No        |
| 58 | Female | 168 | 102 | 152 | 78 | No        |
| 63 | Male   | 156 | 101 | 108 | 87 | Not Known |
| 62 | Female | 145 | 71  | 128 | 95 | Yes       |
| 70 | Female | 156 | 75  | 121 | 87 | Yes       |
| 44 | Male   | 176 | 76  | 111 | 80 | Yes       |
| 54 | Female | 140 | 68  | 105 | 84 | No        |
| 63 | Female | 172 | 103 | 122 | 71 | Yes       |
| 64 | Male   | 174 | 93  | 149 | 95 | Not Known |
| 60 | Male   | 178 | 109 | 110 | 78 | Yes       |
| 63 | Male   | 180 | 104 | 135 | 75 | Not Known |
| 53 | Male   | 181 | 100 | 151 | 77 | Yes       |
| 62 | Male   | 176 | 95  | 145 | 99 | Not Known |
| 45 | Male   | 178 | 80  | 147 | 88 | Yes       |
| 54 | Female | 165 | 90  | 145 | 85 | Not Known |
| 42 | Female | 153 | 48  | 145 | 83 | Yes       |
| 46 | Female | 153 | 76  | 152 | 71 | Yes       |
| 42 | Male   | 155 | 80  | 121 | 88 | Not Known |
| 45 | Female | 156 | 58  | 111 | 81 | Not Known |
| 55 | Female | 157 | 60  | 109 | 75 | Yes       |
| 52 | Female | 156 | 50  | 102 | 78 | Not Known |
| 67 | Male   | 178 | 50  | 101 | 68 | Yes       |
| 58 | Female | 175 | 77  | 109 | 81 | Not Known |
| 57 | Female | 180 | 102 | 108 | 90 | Not Known |
| 64 | Male   | 177 | 75  | 121 | 80 | No        |
| 61 | Male   | 165 | 55  | 118 | 69 | No        |
| 50 | Male   | 175 | 70  | 123 | 88 | No        |
| 43 | Male   | 176 | 95  | 132 | 68 | Yes       |



|    |        |     |     |     |    |           |
|----|--------|-----|-----|-----|----|-----------|
| 63 | Female | 171 | 68  | 134 | 73 | No        |
| 41 | Male   | 172 | 89  | 151 | 85 | Yes       |
| 48 | Female | 143 | 68  | 120 | 88 | Yes       |
| 66 | Female | 147 | 76  | 134 | 97 | Yes       |
| 51 | Female | 149 | 73  | 111 | 78 | Yes       |
| 76 | Female | 156 | 73  | 108 | 85 | Yes       |
| 53 | Male   | 156 | 55  | 135 | 66 | Not Known |
| 48 | Male   | 154 | 77  | 110 | 87 | Not Known |
| 52 | Male   | 152 | 50  | 112 | 75 | Yes       |
| 41 | Female | 153 | 80  | 110 | 78 | Not Known |
| 58 | Male   | 179 | 64  | 95  | 88 | Yes       |
| 37 | Female | 176 | 75  | 142 | 80 | Yes       |
| 58 | Female | 156 | 77  | 98  | 87 | No        |
| 64 | Female | 174 | 104 | 132 | 84 | Yes       |
| 66 | Female | 164 | 83  | 121 | 90 | No        |
| 42 | Female | 176 | 82  | 102 | 82 | No        |
| 55 | Female | 178 | 75  | 107 | 74 | No        |
| 45 | Male   | 174 | 75  | 101 | 80 | Yes       |
| 35 | Female | 167 | 76  | 101 | 88 | No        |
| 67 | Female | 168 | 72  | 120 | 85 | No        |
| 41 | Female | 170 | 76  | 125 | 90 | Yes       |
| 44 | Female | 180 | 105 | 110 | 81 | No        |
| 41 | Female | 159 | 52  | 134 | 78 | Yes       |
| 62 | Female | 173 | 90  | 148 | 84 | Yes       |
| 53 | Female | 156 | 65  | 110 | 88 | No        |
| 62 | Male   | 154 | 65  | 95  | 75 | Not Known |
| 62 | Male   | 158 | 60  | 142 | 91 | No        |
| 66 | Male   | 178 | 103 | 98  | 85 | Not Known |
| 38 | Male   | 159 | 75  | 132 | 74 | No        |
| 70 | Male   | 140 | 67  | 121 | 75 | Not Known |
| 46 | Male   | 158 | 55  | 102 | 88 | No        |
| 51 | Male   | 155 | 58  | 107 | 91 | Not Known |
| 39 | Male   | 145 | 68  | 101 | 80 | Yes       |
| 51 | Male   | 165 | 86  | 101 | 78 | Yes       |
| 66 | Female | 170 | 73  | 120 | 81 | Not Known |
| 47 | Male   | 168 | 60  | 125 | 80 | Not Known |
| 28 | Female | 165 | 67  | 110 | 69 | No        |
| 53 | Female | 174 | 70  | 134 | 91 | Yes       |
| 60 | Female | 174 | 70  | 148 | 86 | Yes       |
| 71 | Female | 172 | 106 | 141 | 90 | Not Known |
| 68 | Female | 142 | 40  | 129 | 88 | Not Known |
| 64 | Female | 165 | 55  | 130 | 81 | No        |
| 31 | Male   | 167 | 75  | 145 | 65 | Not Known |
| 34 | Male   | 165 | 80  | 134 | 68 | Yes       |
| 59 | Female | 179 | 85  | 134 | 88 | Yes       |
| 54 | Male   | 176 | 98  | 128 | 88 | No        |
| 59 | Male   | 171 | 88  | 132 | 82 | No        |

|    |        |     |     |     |    |           |
|----|--------|-----|-----|-----|----|-----------|
| 60 | Male   | 179 | 74  | 120 | 71 | Not Known |
| 52 | Female | 148 | 51  | 120 | 92 | Yes       |
| 59 | Female | 165 | 71  | 101 | 84 | Not Known |
| 74 | Male   | 171 | 60  | 142 | 81 | No        |
| 65 | Male   | 152 | 71  | 120 | 88 | Yes       |
| 52 | Female | 150 | 74  | 140 | 90 | No        |
| 54 | Female | 151 | 74  | 120 | 75 | No        |
| 49 | Male   | 145 | 55  | 104 | 73 | Yes       |
| 40 | Male   | 149 | 55  | 142 | 81 | No        |
| 31 | Female | 145 | 42  | 121 | 88 | No        |
| 52 | Male   | 148 | 72  | 99  | 78 | Not Known |
| 62 | Male   | 180 | 70  | 118 | 81 | Not Known |
| 69 | Female | 179 | 80  | 120 | 85 | Not Known |
| 49 | Male   | 156 | 78  | 148 | 71 | Not Known |
| 74 | Female | 169 | 99  | 119 | 92 | Yes       |
| 61 | Male   | 179 | 107 | 101 | 75 | Not Known |
| 59 | Female | 159 | 99  | 139 | 89 | No        |
| 67 | Female | 170 | 100 | 118 | 92 | Not Known |
| 56 | Male   | 157 | 98  | 105 | 66 | No        |
| 49 | Female | 145 | 50  | 121 | 77 | No        |
| 65 | Female | 156 | 70  | 149 | 90 | Not Known |
| 46 | Male   | 176 | 76  | 114 | 90 | Yes       |
| 44 | Male   | 181 | 76  | 114 | 84 | Yes       |
| 69 | Male   | 181 | 100 | 101 | 88 | Yes       |
| 64 | Male   | 154 | 93  | 145 | 82 | Not Known |
| 41 | Male   | 154 | 68  | 135 | 66 | No        |
| 51 | Female | 154 | 107 | 110 | 89 | No        |
| 64 | Female | 165 | 69  | 104 | 78 | Not Known |
| 62 | Female | 178 | 77  | 119 | 82 | No        |
| 54 | Male   | 178 | 86  | 152 | 92 | No        |
| 64 | Male   | 148 | 76  | 117 | 79 | Yes       |
| 62 | Female | 153 | 73  | 150 | 80 | Not Known |
| 42 | Female | 156 | 77  | 138 | 86 | Yes       |
| 56 | Female | 157 | 76  | 101 | 72 | Yes       |
| 54 | Male   | 180 | 65  | 117 | 71 | No        |
| 44 | Female | 159 | 75  | 123 | 90 | No        |
| 51 | Male   | 176 | 96  | 135 | 95 | Not Known |
| 39 | Male   | 171 | 68  | 101 | 65 | No        |
| 66 | Female | 172 | 90  | 107 | 80 | Not Known |
| 48 | Female | 149 | 54  | 123 | 85 | No        |
| 65 | Female | 156 | 52  | 148 | 85 | Not Known |
| 64 | Female | 145 | 75  | 118 | 75 | Yes       |
| 55 | Female | 152 | 60  | 132 | 76 | Not Known |
| 51 | Female | 151 | 51  | 109 | 88 | No        |
| 41 | Female | 158 | 67  | 142 | 77 | No        |
| 68 | Female | 181 | 102 | 142 | 68 | Yes       |
| 55 | Female | 181 | 100 | 104 | 69 | No        |

|    |        |     |     |     |    |           |
|----|--------|-----|-----|-----|----|-----------|
| 56 | Female | 168 | 70  | 105 | 71 | Yes       |
| 41 | Female | 166 | 101 | 98  | 78 | No        |
| 48 | Male   | 178 | 67  | 121 | 84 | No        |
| 61 | Female | 179 | 86  | 145 | 78 | Not Known |
| 67 | Female | 154 | 62  | 149 | 88 | Yes       |
| 56 | Female | 178 | 85  | 118 | 95 | Not Known |
| 66 | Male   | 168 | 53  | 152 | 78 | No        |
| 50 | Female | 180 | 79  | 101 | 78 | Yes       |
| 68 | Male   | 173 | 69  | 132 | 78 | Not Known |
| 37 | Female | 156 | 78  | 152 | 66 | Not Known |
| 44 | Female | 157 | 50  | 100 | 88 | No        |
| 52 | Female | 140 | 45  | 120 | 66 | No        |
| 42 | Male   | 152 | 71  | 151 | 80 | No        |
| 51 | Male   | 155 | 73  | 121 | 80 | Yes       |
| 43 | Female | 146 | 75  | 99  | 98 | No        |
| 43 | Male   | 165 | 75  | 95  | 80 | Not Known |
| 43 | Female | 153 | 49  | 111 | 90 | No        |
| 41 | Male   | 178 | 62  | 108 | 88 | Yes       |
| 62 | Female | 177 | 69  | 121 | 67 | Yes       |
| 61 | Female | 165 | 85  | 102 | 98 | Yes       |
| 48 | Female | 167 | 88  | 152 | 80 | Yes       |
| 61 | Male   | 155 | 72  | 121 | 71 | Not Known |
| 51 | Female | 178 | 78  | 142 | 68 | Not Known |
| 55 | Female | 179 | 80  | 131 | 95 | Yes       |
| 77 | Female | 155 | 54  | 148 | 88 | No        |
| 44 | Female | 152 | 54  | 147 | 78 | No        |
| 44 | Male   | 150 | 65  | 129 | 64 | No        |
| 31 | Male   | 151 | 50  | 108 | 66 | Yes       |
| 69 | Male   | 169 | 65  | 135 | 84 | Not Known |
| 76 | Female | 169 | 74  | 120 | 81 | Not Known |
| 68 | Female | 178 | 102 | 140 | 71 | Yes       |
| 67 | Female | 177 | 88  | 150 | 81 | Not Known |
| 41 | Female | 154 | 76  | 112 | 92 | No        |
| 43 | Female | 173 | 72  | 142 | 80 | No        |
| 51 | Male   | 162 | 67  | 143 | 88 | Yes       |
| 51 | Female | 176 | 77  | 114 | 92 | No        |
| 70 | Male   | 175 | 105 | 131 | 76 | Not Known |
| 67 | Female | 162 | 98  | 142 | 86 | No        |
| 50 | Male   | 162 | 56  | 151 | 69 | No        |
| 47 | Female | 162 | 74  | 132 | 93 | Yes       |
| 55 | Male   | 165 | 70  | 138 | 90 | Yes       |
| 43 | Male   | 176 | 61  | 101 | 74 | Yes       |
| 65 | Female | 165 | 83  | 110 | 84 | Not Known |
| 67 | Female | 153 | 62  | 108 | 82 | Not Known |
| 35 | Female | 153 | 50  | 104 | 90 | No        |
| 76 | Male   | 181 | 75  | 101 | 82 | Not Known |
| 52 | Male   | 165 | 65  | 145 | 95 | Yes       |

|    |        |     |     |     |    |           |
|----|--------|-----|-----|-----|----|-----------|
| 77 | Female | 158 | 85  | 110 | 98 | Yes       |
| 56 | Female | 159 | 62  | 132 | 90 | No        |
| 45 | Female | 166 | 66  | 132 | 98 | No        |
| 32 | Male   | 176 | 85  | 123 | 80 | No        |
| 35 | Female | 147 | 45  | 129 | 95 | Yes       |
| 45 | Female | 154 | 56  | 118 | 99 | No        |
| 71 | Female | 153 | 74  | 142 | 80 | Yes       |
| 47 | Female | 158 | 78  | 131 | 80 | No        |
| 35 | Female | 180 | 110 | 95  | 83 | No        |
| 38 | Male   | 171 | 72  | 131 | 78 | Yes       |
| 65 | Female | 178 | 77  | 142 | 86 | Not Known |
| 71 | Male   | 179 | 71  | 138 | 88 | No        |
| 47 | Male   | 167 | 70  | 105 | 88 | Yes       |
| 42 | Female | 168 | 80  | 102 | 88 | No        |
| 50 | Female | 170 | 80  | 128 | 70 | Not Known |
| 68 | Female | 149 | 96  | 146 | 74 | No        |
| 46 | Male   | 162 | 78  | 122 | 92 | Not Known |
| 48 | Female | 157 | 56  | 104 | 87 | Yes       |
| 45 | Male   | 159 | 67  | 120 | 87 | No        |
| 34 | Male   | 140 | 45  | 108 | 66 | No        |
| 25 | Female | 155 | 53  | 99  | 66 | No        |
| 52 | Female | 145 | 48  | 105 | 80 | No        |
| 41 | Female | 146 | 43  | 124 | 80 | Yes       |
| 44 | Female | 153 | 51  | 112 | 74 | Yes       |
| 65 | Male   | 165 | 88  | 140 | 82 | Not Known |
| 45 | Female | 177 | 81  | 152 | 78 | Not Known |
| 44 | Female | 165 | 71  | 112 | 72 | Not Known |
| 38 | Male   | 178 | 105 | 114 | 90 | No        |
| 44 | Male   | 155 | 77  | 118 | 79 | Yes       |
| 43 | Female | 176 | 98  | 132 | 80 | Yes       |
| 48 | Female | 178 | 99  | 108 | 80 | Not Known |
| 35 | Female | 175 | 98  | 132 | 98 | Yes       |
| 49 | Female | 145 | 74  | 132 | 81 | No        |
| 48 | Female | 150 | 55  | 120 | 66 | No        |
| 47 | Male   | 145 | 47  | 135 | 95 | No        |
| 45 | Female | 148 | 62  | 123 | 77 | Yes       |
| 74 | Female | 149 | 55  | 101 | 87 | No        |
| 41 | Male   | 156 | 60  | 141 | 82 | Yes       |
| 51 | Male   | 181 | 63  | 142 | 92 | No        |
| 38 | Female | 156 | 65  | 132 | 88 | Yes       |
| 41 | Female | 145 | 78  | 147 | 66 | No        |
| 49 | Female | 156 | 55  | 128 | 89 | No        |
| 43 | Female | 176 | 62  | 118 | 78 | No        |
| 44 | Male   | 176 | 108 | 147 | 88 | Not Known |
| 35 | Female | 165 | 68  | 120 | 95 | No        |
| 37 | Female | 159 | 66  | 120 | 80 | Yes       |
| 39 | Female | 166 | 70  | 114 | 98 | Yes       |

|    |        |     |     |     |    |           |
|----|--------|-----|-----|-----|----|-----------|
| 49 | Male   | 143 | 67  | 149 | 91 | Yes       |
| 43 | Male   | 149 | 55  | 138 | 68 | No        |
| 38 | Female | 158 | 51  | 121 | 90 | No        |
| 43 | Male   | 152 | 50  | 131 | 70 | Yes       |
| 45 | Female | 179 | 65  | 138 | 75 | No        |
| 40 | Male   | 156 | 76  | 120 | 85 | Yes       |
| 71 | Male   | 159 | 62  | 121 | 69 | No        |
| 68 | Male   | 145 | 42  | 110 | 75 | Yes       |
| 65 | Female | 148 | 75  | 126 | 81 | Not Known |
| 47 | Female | 154 | 51  | 121 | 80 | yes       |
| 68 | Female | 162 | 76  | 114 | 77 | Not Known |
| 35 | Female | 154 | 62  | 129 | 92 | No        |
| 40 | Female | 140 | 62  | 130 | 82 | Yes       |
| 39 | Female | 165 | 60  | 101 | 78 | No        |
| 69 | Female | 162 | 99  | 105 | 82 | Yes       |
| 50 | Female | 165 | 85  | 138 | 86 | No        |
| 47 | Female | 151 | 92  | 152 | 81 | No        |
| 45 | Female | 173 | 85  | 145 | 87 | No        |
| 39 | Female | 174 | 68  | 100 | 72 | Yes       |
| 71 | Female | 145 | 68  | 122 | 79 | Yes       |
| 69 | Female | 158 | 60  | 102 | 83 | Not Known |
| 73 | Male   | 179 | 105 | 101 | 88 | Not Known |
| 38 | Male   | 180 | 75  | 145 | 66 | Yes       |
| 69 | Male   | 156 | 59  | 109 | 86 | No        |
| 73 | Female | 169 | 70  | 120 | 85 | No        |
| 46 | Female | 165 | 62  | 125 | 79 | No        |
| 70 | Female | 150 | 55  | 142 | 72 | No        |
| 39 | Male   | 145 | 52  | 97  | 77 | No        |
| 65 | Female | 152 | 71  | 128 | 78 | No        |
| 72 | Male   | 181 | 102 | 120 | 80 | No        |
| 34 | Male   | 170 | 60  | 97  | 87 | Yes       |
| 65 | Male   | 165 | 77  | 123 | 89 | Yes       |
| 73 | Female | 172 | 76  | 100 | 90 | Not Known |
| 68 | Male   | 171 | 109 | 127 | 76 | Yes       |
| 68 | Female | 157 | 54  | 109 | 79 | No        |
| 40 | Male   | 140 | 66  | 152 | 85 | Not Known |
| 35 | Male   | 178 | 85  | 118 | 74 | Yes       |
| 46 | Female | 146 | 65  | 142 | 90 | No        |
| 46 | Male   | 179 | 99  | 152 | 88 | Yes       |
| 40 | Female | 147 | 62  | 145 | 88 | No        |
| 39 | Female | 151 | 52  | 128 | 99 | No        |
| 46 | Female | 165 | 65  | 120 | 87 | No        |
| 46 | Female | 145 | 73  | 118 | 78 | Yes       |
| 77 | Female | 165 | 65  | 142 | 86 | Not Known |
| 25 | Male   | 177 | 75  | 92  | 65 | No        |
| 54 | Male   | 174 | 59  | 99  | 88 | Yes       |
| 59 | Male   | 168 | 82  | 98  | 94 | No        |

|    |        |     |    |     |    |     |
|----|--------|-----|----|-----|----|-----|
| 47 | Male   | 169 | 85 | 95  | 88 | Yes |
| 77 | Male   | 165 | 67 | 99  | 88 | Yes |
| 45 | Female | 176 | 76 | 94  | 82 | Yes |
| 58 | Male   | 178 | 68 | 102 | 71 | No  |
| 46 | Male   | 165 | 69 | 108 | 92 | Yes |
| 67 | Male   | 153 | 64 | 110 | 84 | Yes |
| 69 | Female | 153 | 92 | 121 | 81 | Yes |
| 49 | Female | 155 | 90 | 99  | 88 | No  |
| 58 | Female | 156 | 89 | 98  | 94 | Yes |
| 66 | Female | 157 | 88 | 92  | 75 | Yes |
| 52 | Female | 156 | 79 | 91  | 73 | Yes |
| 57 | Male   | 157 | 94 | 120 | 81 | Yes |
| 60 | Male   | 158 | 79 | 123 | 88 | No  |
| 41 | Male   | 159 | 81 | 101 | 78 | Yes |
| 46 | Female | 161 | 82 | 104 | 81 | Yes |
| 58 | Female | 165 | 76 | 115 | 85 | Yes |
| 43 | Female | 166 | 78 | 112 | 71 | No  |
| 71 | Female | 176 | 75 | 102 | 92 | Yes |
| 69 | Female | 171 | 73 | 105 | 75 | Yes |
| 56 | Female | 172 | 83 | 108 | 89 | Yes |
| 47 | Female | 143 | 84 | 107 | 92 | No  |
| 41 | Male   | 147 | 82 | 106 | 66 | Yes |
| 51 | Male   | 149 | 76 | 109 | 77 | Yes |
| 47 | Female | 156 | 79 | 111 | 90 | Yes |
| 47 | Male   | 155 | 78 | 100 | 90 | Yes |
| 54 | Female | 154 | 86 | 105 | 84 | Yes |
| 67 | Female | 152 | 89 | 120 | 88 | No  |
| 56 | Male   | 151 | 67 | 132 | 82 | No  |
| 57 | Female | 153 | 66 | 125 | 66 | Yes |
| 43 | Male   | 158 | 63 | 124 | 89 | Yes |
| 59 | Male   | 179 | 58 | 128 | 78 | Yes |
| 55 | Female | 181 | 56 | 129 | 82 | No  |
| 55 | Male   | 181 | 67 | 124 | 92 | Yes |
| 52 | Male   | 174 | 58 | 126 | 79 | Yes |
| 53 | Male   | 176 | 61 | 121 | 80 | Yes |
| 58 | Male   | 167 | 63 | 122 | 86 | Yes |
| 29 | Male   | 178 | 67 | 132 | 85 | Yes |
| 71 | Female | 179 | 78 | 130 | 71 | No  |
| 59 | Female | 174 | 79 | 131 | 90 | No  |
| 41 | Male   | 167 | 92 | 123 | 95 | Yes |
| 41 | Male   | 168 | 54 | 125 | 65 | Yes |
| 46 | Male   | 156 | 55 | 128 | 80 | Yes |
| 68 | Male   | 159 | 59 | 124 | 85 | No  |
| 71 | Female | 180 | 61 | 129 | 85 | Yes |
| 62 | Female | 174 | 61 | 126 | 75 | Yes |
| 46 | Female | 173 | 89 | 110 | 76 | Yes |
| 70 | Male   | 156 | 89 | 100 | 88 | Yes |

|    |        |     |    |     |    |     |
|----|--------|-----|----|-----|----|-----|
| 41 | Male   | 154 | 90 | 102 | 77 | Yes |
| 40 | Female | 154 | 60 | 103 | 68 | No  |
| 62 | Female | 157 | 66 | 105 | 69 | No  |
| 35 | Male   | 159 | 64 | 108 | 81 | Yes |
| 44 | Male   | 140 | 67 | 107 | 83 | Yes |
| 60 | Male   | 152 | 61 | 106 | 88 | Yes |
| 58 | Male   | 155 | 62 | 104 | 95 | No  |
| 59 | Male   | 145 | 90 | 109 | 92 | Yes |
| 54 | Male   | 146 | 62 | 103 | 80 | Yes |
| 44 | Male   | 165 | 92 | 102 | 78 | Yes |
| 45 | Male   | 148 | 75 | 108 | 89 | Yes |
| 47 | Male   | 153 | 72 | 120 | 81 | Yes |
| 41 | Female | 154 | 70 | 111 | 95 | No  |
| 44 | Female | 165 | 67 | 102 | 71 | No  |
| 57 | Male   | 181 | 66 | 121 | 99 | Yes |
| 66 | Male   | 179 | 79 | 122 | 80 | Yes |
| 51 | Female | 179 | 89 | 135 | 78 | Yes |
| 54 | Male   | 143 | 90 | 145 | 95 | No  |
| 56 | Female | 165 | 93 | 152 | 88 | Yes |
| 57 | Male   | 167 | 94 | 135 | 94 | Yes |
| 54 | Male   | 156 | 87 | 137 | 72 | Yes |
| 40 | Male   | 155 | 49 | 138 | 94 | Yes |
| 67 | Male   | 176 | 58 | 129 | 87 | Yes |
| 43 | Male   | 178 | 84 | 90  | 95 | No  |
| 41 | Male   | 179 | 88 | 99  | 87 | No  |
| 58 | Female | 145 | 94 | 98  | 80 | Yes |
| 58 | Male   | 146 | 91 | 97  | 84 | Yes |
| 55 | Female | 165 | 68 | 90  | 71 | Yes |
| 34 | Male   | 155 | 88 | 95  | 95 | No  |
| 51 | Female | 152 | 69 | 96  | 78 | Yes |
| 57 | Female | 150 | 81 | 99  | 75 | Yes |
| 67 | Male   | 151 | 83 | 97  | 77 | Yes |
| 47 | Female | 145 | 85 | 93  | 99 | Yes |
| 58 | Female | 149 | 76 | 92  | 88 | Yes |
| 52 | Female | 145 | 71 | 100 | 85 | No  |
| 50 | Female | 148 | 72 | 110 | 95 | No  |
| 44 | Male   | 152 | 77 | 102 | 71 | Yes |
| 54 | Male   | 157 | 66 | 104 | 88 | Yes |
| 44 | Male   | 156 | 54 | 106 | 81 | Yes |
| 62 | Male   | 178 | 58 | 120 | 75 | No  |
| 57 | Male   | 181 | 56 | 121 | 78 | Yes |
| 54 | Female | 179 | 67 | 135 | 68 | Yes |
| 65 | Female | 181 | 65 | 142 | 81 | Yes |
| 45 | Female | 168 | 68 | 152 | 90 | Yes |
| 56 | Male   | 173 | 69 | 150 | 80 | Yes |
| 46 | Male   | 145 | 73 | 142 | 69 | No  |
| 54 | Female | 156 | 77 | 124 | 88 | No  |

|    |        |     |    |     |    |     |
|----|--------|-----|----|-----|----|-----|
| 63 | Female | 176 | 79 | 132 | 68 | Yes |
| 64 | Female | 181 | 61 | 134 | 73 | Yes |
| 76 | Female | 179 | 55 | 129 | 85 | Yes |
| 40 | Female | 174 | 54 | 127 | 88 | No  |
| 59 | Male   | 174 | 50 | 125 | 97 | Yes |
| 63 | Female | 172 | 51 | 102 | 78 | Yes |
| 55 | Female | 165 | 55 | 105 | 85 | Yes |
| 71 | Female | 176 | 52 | 123 | 66 | No  |
| 52 | Male   | 178 | 51 | 149 | 87 | No  |
| 56 | Male   | 165 | 65 | 138 | 75 | Yes |
| 54 | Female | 153 | 67 | 121 | 78 | Yes |
| 59 | Female | 153 | 92 | 131 | 88 | Yes |
| 46 | Female | 155 | 88 | 138 | 80 | No  |
| 55 | Female | 156 | 82 | 120 | 91 | Yes |
| 56 | Male   | 157 | 81 | 121 | 89 | Yes |
| 61 | Female | 156 | 81 | 110 | 78 | Yes |
| 40 | Male   | 157 | 84 | 126 | 82 | No  |
| 59 | Male   | 158 | 67 | 121 | 81 | No  |
| 60 | Male   | 159 | 78 | 114 | 88 | Yes |
| 58 | Male   | 161 | 77 | 129 | 75 | Yes |
| 59 | Female | 165 | 75 | 130 | 95 | Yes |
| 44 | Female | 166 | 75 | 101 | 74 | No  |
| 53 | Female | 176 | 67 | 105 | 92 | Yes |
| 57 | Male   | 171 | 65 | 138 | 83 | Yes |
| 58 | Female | 172 | 80 | 152 | 86 | Yes |
| 54 | Male   | 143 | 81 | 145 | 95 | No  |
| 62 | Male   | 147 | 82 | 100 | 92 | No  |
| 57 | Male   | 149 | 69 | 122 | 80 | Yes |
| 67 | Male   | 156 | 65 | 102 | 78 | Yes |
| 57 | Male   | 155 | 62 | 101 | 89 | Yes |
| 52 | Female | 154 | 61 | 145 | 81 | No  |
| 38 | Female | 152 | 60 | 109 | 88 | Yes |
| 52 | Male   | 151 | 65 | 120 | 95 | Yes |
| 44 | Male   | 153 | 61 | 125 | 92 | Yes |
| 50 | Male   | 158 | 62 | 142 | 80 | No  |
| 62 | Male   | 179 | 59 | 97  | 78 | No  |
| 58 | Female | 181 | 58 | 128 | 89 | Yes |
| 61 | Male   | 181 | 81 | 120 | 81 | Yes |
| 63 | Male   | 175 | 71 | 97  | 95 | Yes |
| 65 | Female | 176 | 72 | 123 | 71 | No  |
| 64 | Male   | 167 | 93 | 100 | 99 | Yes |
| 44 | Female | 178 | 96 | 127 | 80 | Yes |
| 57 | Female | 179 | 87 | 109 | 78 | Yes |
| 52 | Female | 174 | 88 | 152 | 87 | No  |
| 53 | Female | 167 | 83 | 118 | 88 | No  |
| 67 | Male   | 168 | 45 | 142 | 94 | Yes |
| 58 | Male   | 156 | 56 | 99  | 72 | Yes |



|    |        |     |    |     |    |     |
|----|--------|-----|----|-----|----|-----|
| 41 | Male   | 159 | 67 | 98  | 94 | No  |
| 50 | Male   | 180 | 71 | 102 | 87 | Yes |
| 41 | Male   | 174 | 71 | 101 | 95 | No  |
| 29 | Female | 173 | 75 | 100 | 87 | No  |
| 61 | Male   | 156 | 67 | 115 | 80 | No  |
| 45 | Female | 154 | 87 | 114 | 84 | No  |
| 59 | Male   | 154 | 69 | 120 | 71 | No  |
| 63 | Female | 157 | 67 | 123 | 95 | Yes |
| 58 | Female | 159 | 59 | 132 | 78 | Yes |
| 65 | Female | 140 | 81 | 111 | 75 | Yes |
| 66 | Female | 152 | 65 | 120 | 77 | Yes |
| 45 | Female | 155 | 68 | 151 | 99 | No  |
| 64 | Female | 145 | 61 | 142 | 82 | Yes |
| 62 | Female | 146 | 60 | 123 | 85 | Yes |
| 35 | Male   | 165 | 59 | 132 | 95 | No  |
| 53 | Male   | 148 | 54 | 128 | 90 | Yes |
| 59 | Female | 153 | 51 | 99  | 90 | No  |
| 35 | Male   | 154 | 55 | 135 | 84 | No  |
| 64 | Male   | 165 | 51 | 124 | 88 | Yes |
| 63 | Male   | 181 | 56 | 120 | 82 | Yes |
| 49 | Male   | 179 | 68 | 125 | 66 | Yes |
| 62 | Male   | 179 | 78 | 132 | 89 | Yes |
| 45 | Male   | 145 | 76 | 125 | 78 | Yes |
| 35 | Female | 165 | 77 | 128 | 82 | Yes |
| 53 | Female | 167 | 65 | 99  | 92 | Yes |
| 42 | Female | 156 | 67 | 98  | 79 | No  |
| 62 | Female | 155 | 71 | 99  | 80 | Yes |
| 55 | Male   | 176 | 72 | 99  | 86 | Yes |
| 61 | Male   | 178 | 77 | 102 | 80 | No  |
| 44 | Male   | 179 | 79 | 108 | 80 | Yes |
| 59 | Male   | 145 | 75 | 132 | 88 | Yes |
| 49 | Male   | 146 | 56 | 142 | 90 | Yes |
| 68 | Male   | 165 | 56 | 145 | 92 | No  |
| 65 | Female | 155 | 74 | 152 | 80 | Yes |
| 59 | Male   | 152 | 67 | 132 | 95 | Yes |
| 54 | Female | 150 | 61 | 120 | 90 | No  |
| 57 | Male   | 151 | 65 | 122 | 85 | Yes |
| 61 | Male   | 145 | 76 | 118 | 88 | Yes |
| 53 | Female | 149 | 49 | 105 | 89 | Yes |
| 29 | Male   | 145 | 49 | 120 | 75 | No  |
| 56 | Female | 148 | 55 | 123 | 77 | Yes |
| 52 | Male   | 152 | 51 | 126 | 90 | Yes |
| 70 | Male   | 157 | 58 | 127 | 88 | No  |
| 47 | Male   | 156 | 58 | 128 | 89 | Yes |
| 53 | Male   | 178 | 56 | 120 | 92 | Yes |
| 66 | Male   | 177 | 71 | 123 | 82 | Yes |
| 46 | Male   | 179 | 77 | 124 | 87 | No  |

|    |        |     |    |     |    |     |
|----|--------|-----|----|-----|----|-----|
| 56 | Male   | 181 | 76 | 125 | 81 | Yes |
| 57 | Male   | 169 | 69 | 124 | 82 | Yes |
| 62 | Male   | 176 | 66 | 120 | 95 | No  |
| 63 | Female | 145 | 72 | 90  | 98 | Yes |
| 62 | Female | 156 | 73 | 93  | 97 | Yes |
| 42 | Male   | 176 | 70 | 92  | 95 | Yes |
| 52 | Male   | 181 | 72 | 94  | 98 | No  |
| 45 | Male   | 179 | 56 | 99  | 91 | Yes |
| 44 | Male   | 174 | 56 | 100 | 80 | Yes |
| 52 | Male   | 177 | 51 | 124 | 78 | No  |
| 58 | Male   | 170 | 65 | 125 | 87 | Yes |
| 43 | Female | 165 | 65 | 95  | 90 | Yes |
| 53 | Male   | 176 | 62 | 121 | 95 | Yes |
| 52 | Male   | 178 | 69 | 110 | 92 | No  |
| 67 | Male   | 165 | 70 | 92  | 97 | Yes |
| 57 | Male   | 153 | 71 | 111 | 90 | Yes |
| 54 | Female | 153 | 81 | 108 | 97 | No  |
| 49 | Male   | 155 | 83 | 102 | 93 | Yes |
| 45 | Male   | 156 | 83 | 101 | 91 | Yes |
| 62 | Female | 157 | 84 | 101 | 95 | Yes |
| 60 | Male   | 156 | 73 | 142 | 80 | No  |
| 41 | Male   | 157 | 78 | 121 | 85 | Yes |
| 70 | Male   | 158 | 77 | 148 | 88 | Yes |
| 60 | Male   | 159 | 71 | 145 | 86 | No  |
| 42 | Male   | 161 | 77 | 101 | 87 | Yes |
| 54 | Male   | 165 | 75 | 108 | 89 | Yes |
| 53 | Female | 166 | 73 | 132 | 71 | Yes |
| 58 | Male   | 176 | 69 | 112 | 99 | No  |
| 29 | Male   | 171 | 66 | 120 | 80 | Yes |
| 62 | Male   | 172 | 86 | 102 | 78 | Yes |
| 66 | Female | 143 | 81 | 121 | 95 | No  |
| 54 | Female | 147 | 83 | 120 | 88 | Yes |
| 63 | Female | 149 | 69 | 119 | 94 | Yes |
| 57 | Male   | 156 | 76 | 123 | 72 | Yes |
| 62 | Female | 155 | 71 | 98  | 94 | No  |
| 53 | Female | 154 | 71 | 142 | 87 | Yes |
| 61 | Female | 152 | 67 | 130 | 95 | Yes |
| 62 | Male   | 151 | 68 | 132 | 87 | No  |
| 69 | Female | 153 | 66 | 96  | 80 | Yes |
| 55 | Female | 158 | 67 | 120 | 84 | Yes |
| 60 | Female | 179 | 60 | 115 | 71 | Yes |
| 67 | Female | 177 | 66 | 135 | 95 | No  |
| 49 | Female | 181 | 67 | 98  | 78 | Yes |
| 58 | Female | 168 | 64 | 121 | 75 | Yes |
| 54 | Female | 176 | 72 | 131 | 77 | No  |
| 58 | Male   | 167 | 73 | 101 | 99 | Yes |
| 58 | Female | 178 | 59 | 135 | 88 | Yes |

|    |        |     |    |     |    |     |
|----|--------|-----|----|-----|----|-----|
| 37 | Female | 148 | 67 | 111 | 98 | Yes |
| 64 | Male   | 153 | 60 | 109 | 95 | Yes |
| 63 | Female | 154 | 67 | 102 | 90 | Yes |
| 53 | Female | 165 | 80 | 101 | 85 | No  |
| 66 | Female | 177 | 81 | 109 | 88 | Yes |
| 69 | Male   | 179 | 83 | 108 | 89 | No  |
| 66 | Female | 179 | 60 | 121 | 75 | Yes |
| 41 | Male   | 148 | 61 | 118 | 77 | Yes |
| 59 | Female | 165 | 65 | 123 | 90 | Yes |
| 59 | Female | 167 | 59 | 132 | 88 | Yes |
| 56 | Female | 156 | 57 | 134 | 89 | No  |
| 55 | Male   | 155 | 59 | 151 | 92 | Yes |
| 52 | Female | 176 | 55 | 120 | 82 | Yes |
| 45 | Female | 178 | 50 | 134 | 87 | No  |
| 67 | Female | 179 | 53 | 111 | 81 | Yes |
| 45 | Male   | 145 | 54 | 108 | 82 | Yes |
| 51 | Male   | 146 | 59 | 135 | 95 | No  |
| 64 | Female | 165 | 76 | 110 | 98 | Yes |
| 35 | Male   | 155 | 71 | 112 | 97 | No  |
| 53 | Male   | 152 | 68 | 110 | 95 | Yes |
| 41 | Male   | 150 | 79 | 95  | 98 | Yes |
| 61 | Male   | 151 | 85 | 142 | 91 | Yes |
| 54 | Female | 145 | 88 | 98  | 80 | Yes |
| 66 | Male   | 149 | 87 | 132 | 78 | No  |
| 62 | Male   | 145 | 84 | 121 | 87 | Yes |
| 61 | Male   | 148 | 82 | 102 | 90 | Yes |
| 54 | Male   | 152 | 65 | 107 | 95 | No  |
| 58 | Male   | 157 | 68 | 101 | 92 | Yes |
| 54 | Male   | 156 | 76 | 101 | 97 | Yes |
| 63 | Male   | 178 | 87 | 120 | 90 | No  |
| 55 | Female | 177 | 90 | 125 | 97 | Yes |
| 48 | Male   | 179 | 79 | 110 | 93 | No  |
| 51 | Male   | 181 | 78 | 134 | 91 | Yes |
| 44 | Male   | 175 | 79 | 148 | 87 | Yes |
| 43 | Female | 169 | 80 | 110 | 95 | Yes |
| 67 | Male   | 145 | 65 | 95  | 87 | Yes |
| 58 | Male   | 156 | 87 | 142 | 80 | No  |
| 62 | Male   | 176 | 90 | 98  | 84 | Yes |
| 57 | Male   | 181 | 83 | 132 | 71 | Yes |
| 62 | Female | 169 | 76 | 121 | 95 | No  |
| 55 | Female | 174 | 80 | 102 | 78 | Yes |
| 43 | Male   | 178 | 76 | 107 | 75 | Yes |
| 34 | Female | 179 | 68 | 101 | 77 | No  |
| 61 | Male   | 165 | 64 | 101 | 99 | Yes |
| 51 | Female | 176 | 67 | 120 | 88 | No  |
| 42 | Male   | 178 | 63 | 125 | 85 | Yes |
| 57 | Female | 165 | 59 | 110 | 95 | Yes |

|    |        |     |     |     |    |     |
|----|--------|-----|-----|-----|----|-----|
| 43 | Female | 153 | 61  | 134 | 71 | Yes |
| 62 | Female | 153 | 76  | 148 | 81 | Yes |
| 59 | Female | 155 | 72  | 141 | 81 | No  |
| 62 | Male   | 156 | 89  | 129 | 75 | Yes |
| 52 | Male   | 157 | 90  | 130 | 78 | Yes |
| 58 | Male   | 156 | 88  | 145 | 68 | No  |
| 40 | Male   | 157 | 68  | 134 | 81 | Yes |
| 63 | Female | 158 | 76  | 134 | 90 | Yes |
| 60 | Female | 159 | 59  | 128 | 80 | No  |
| 61 | Male   | 161 | 69  | 132 | 69 | Yes |
| 45 | Male   | 165 | 68  | 120 | 88 | No  |
| 62 | Male   | 178 | 82  | 114 | 85 | No  |
| 57 | Female | 179 | 76  | 114 | 90 | Yes |
| 43 | Female | 174 | 79  | 101 | 81 | Yes |
| 59 | Male   | 167 | 78  | 145 | 78 | Yes |
| 57 | Male   | 180 | 61  | 135 | 99 | Yes |
| 53 | Female | 156 | 70  | 110 | 88 | No  |
| 45 | Male   | 159 | 67  | 104 | 75 | No  |
| 41 | Female | 180 | 66  | 119 | 91 | Yes |
| 41 | Male   | 174 | 63  | 152 | 85 | No  |
| 57 | Male   | 173 | 58  | 117 | 74 | Yes |
| 37 | Female | 156 | 56  | 145 | 75 | No  |
| 41 | Male   | 154 | 67  | 138 | 88 | Yes |
| 59 | Female | 154 | 58  | 101 | 91 | Yes |
| 50 | Female | 157 | 61  | 117 | 80 | Yes |
| 65 | Female | 159 | 63  | 123 | 78 | Yes |
| 47 | Female | 140 | 67  | 135 | 81 | Yes |
| 46 | Male   | 172 | 85  | 101 | 80 | Yes |
| 73 | Male   | 176 | 70  | 107 | 69 | Yes |
| 69 | Female | 171 | 87  | 123 | 91 | Yes |
| 25 | Female | 174 | 70  | 91  | 78 | No  |
| 73 | Female | 164 | 100 | 118 | 90 | No  |
| 75 | Female | 148 | 55  | 132 | 88 | Yes |
| 35 | Female | 159 | 78  | 109 | 81 | No  |
| 72 | Female | 178 | 75  | 142 | 65 | Yes |
| 40 | Female | 154 | 50  | 142 | 68 | Yes |
| 40 | Male   | 155 | 56  | 104 | 88 | No  |
| 81 | Female | 146 | 68  | 105 | 88 | Yes |
| 76 | Female | 162 | 78  | 98  | 82 | No  |
| 40 | Female | 174 | 60  | 121 | 71 | Yes |
| 40 | Male   | 172 | 61  | 145 | 92 | No  |
| 50 | Female | 148 | 42  | 148 | 78 | No  |
| 75 | Female | 176 | 80  | 118 | 81 | Yes |
| 38 | Female | 152 | 45  | 152 | 88 | Yes |
| 35 | Female | 154 | 60  | 101 | 94 | No  |
| 50 | Female | 158 | 78  | 132 | 75 | Yes |
| 50 | Male   | 180 | 80  | 152 | 73 | No  |

|    |        |     |     |     |    |           |
|----|--------|-----|-----|-----|----|-----------|
| 25 | Female | 159 | 68  | 92  | 81 | Not Known |
| 35 | Male   | 165 | 88  | 120 | 88 | No        |
| 35 | Female | 165 | 66  | 154 | 78 | Yes       |
| 26 | Male   | 145 | 49  | 121 | 81 | Yes       |
| 72 | Male   | 179 | 70  | 99  | 85 | Not Known |
| 72 | Female | 152 | 77  | 95  | 71 | No        |
| 26 | Female | 154 | 75  | 111 | 92 | No        |
| 69 | Male   | 153 | 77  | 108 | 75 | Yes       |
| 75 | Male   | 159 | 58  | 121 | 89 | No        |
| 37 | Male   | 148 | 45  | 102 | 92 | No        |
| 69 | Female | 160 | 85  | 152 | 78 | No        |
| 35 | Male   | 155 | 54  | 121 | 77 | Yes       |
| 26 | Female | 159 | 68  | 142 | 90 | No        |
| 50 | Female | 166 | 67  | 131 | 90 | No        |
| 37 | Female | 156 | 82  | 148 | 77 | Not Known |
| 50 | Female | 157 | 51  | 149 | 88 | No        |
| 50 | Male   | 146 | 41  | 129 | 82 | Not Known |
| 24 | Female | 143 | 55  | 96  | 61 | No        |
| 69 | Female | 162 | 50  | 135 | 89 | Yes       |
| 35 | Male   | 157 | 53  | 120 | 78 | No        |
| 50 | Female | 141 | 63  | 140 | 82 | Yes       |
| 29 | Male   | 156 | 59  | 150 | 92 | No        |
| 50 | Male   | 161 | 80  | 112 | 79 | Yes       |
| 26 | Male   | 176 | 75  | 142 | 80 | Yes       |
| 50 | Female | 142 | 60  | 135 | 86 | No        |
| 75 | Female | 159 | 105 | 114 | 71 | Not Known |
| 50 | Male   | 167 | 62  | 131 | 71 | Yes       |
| 39 | Female | 178 | 68  | 142 | 90 | Yes       |
| 23 | Female | 168 | 70  | 92  | 66 | No        |
| 78 | Female | 156 | 75  | 132 | 65 | Yes       |
| 74 | Female | 170 | 78  | 138 | 80 | Yes       |
| 39 | Female | 155 | 75  | 101 | 85 | No        |
| 34 | Male   | 172 | 65  | 110 | 85 | No        |
| 39 | Male   | 177 | 60  | 108 | 75 | Not Known |
| 23 | Female | 143 | 50  | 91  | 65 | Not Known |
| 35 | Female | 165 | 68  | 101 | 88 | Yes       |
| 37 | Female | 180 | 66  | 145 | 77 | No        |
| 78 | Female | 148 | 54  | 110 | 68 | Not Known |
| 78 | Male   | 178 | 96  | 132 | 69 | Not Known |
| 26 | Male   | 172 | 72  | 132 | 77 | No        |
| 72 | Female | 149 | 58  | 123 | 78 | Yes       |
| 67 | Male   | 177 | 79  | 129 | 84 | No        |
| 37 | Female | 145 | 48  | 118 | 78 | Yes       |
| 26 | Male   | 153 | 60  | 142 | 88 | Yes       |
| 34 | Male   | 174 | 89  | 131 | 95 | Yes       |
| 34 | Male   | 178 | 72  | 95  | 78 | No        |
| 79 | Male   | 153 | 57  | 131 | 78 | No        |

|    |        |     |     |     |    |           |
|----|--------|-----|-----|-----|----|-----------|
| 27 | Male   | 172 | 103 | 142 | 78 | Yes       |
| 38 | Female | 159 | 47  | 138 | 89 | Yes       |
| 27 | Male   | 178 | 105 | 105 | 88 | No        |
| 27 | Male   | 154 | 49  | 102 | 66 | No        |
| 82 | Female | 152 | 55  | 128 | 80 | No        |
| 23 | Male   | 176 | 85  | 93  | 72 | Yes       |
| 38 | Male   | 171 | 100 | 122 | 98 | No        |
| 31 | Male   | 174 | 72  | 104 | 80 | No        |
| 34 | Female | 152 | 48  | 120 | 90 | No        |
| 37 | Female | 176 | 62  | 108 | 88 | No        |
| 37 | Male   | 176 | 95  | 144 | 67 | No        |
| 80 | Female | 155 | 52  | 105 | 98 | Not Known |
| 38 | Female | 168 | 71  | 124 | 80 | Not Known |
| 37 | Male   | 156 | 62  | 112 | 71 | Yes       |
| 80 | Male   | 172 | 80  | 140 | 68 | Not Known |
| 26 | Female | 162 | 83  | 152 | 95 | Yes       |
| 26 | Female | 160 | 55  | 112 | 95 | No        |
| 28 | Male   | 164 | 87  | 114 | 78 | Yes       |
| 34 | Female | 155 | 59  | 118 | 70 | Not Known |
| 28 | Female | 162 | 84  | 132 | 66 | No        |
| 34 | Female | 168 | 56  | 108 | 84 | No        |
| 80 | Female | 159 | 81  | 132 | 81 | Yes       |
| 34 | Female | 165 | 87  | 132 | 71 | Yes       |
| 22 | Female | 143 | 52  | 93  | 64 | No        |
| 80 | Female | 145 | 75  | 135 | 92 | No        |
| 80 | Male   | 167 | 62  | 123 | 80 | Not Known |
| 23 | Female | 175 | 88  | 97  | 64 | Yes       |
| 24 | Female | 153 | 74  | 91  | 77 | Not Known |
| 24 | Male   | 178 | 88  | 99  | 76 | No        |
| 34 | Female | 153 | 56  | 132 | 86 | Yes       |
| 34 | Female | 155 | 53  | 147 | 69 | No        |
| 81 | Female | 140 | 45  | 150 | 88 | Yes       |
| 34 | Female | 154 | 58  | 118 | 90 | No        |
| 24 | Female | 146 | 62  | 90  | 90 | No        |
| 23 | Female | 152 | 75  | 97  | 99 | Yes       |
| 34 | Female | 156 | 62  | 120 | 82 | No        |
| 82 | Female | 174 | 60  | 114 | 90 | Not Known |
| 82 | Male   | 172 | 65  | 149 | 82 | Not Known |
| 24 | Male   | 168 | 60  | 92  | 80 | Yes       |
| 24 | Male   | 178 | 80  | 93  | 98 | Not Known |
| 81 | Female | 140 | 65  | 131 | 90 | Not Known |
| 81 | Female | 150 | 55  | 138 | 98 | Not Known |
| 81 | Female | 150 | 59  | 120 | 80 | No        |
| 81 | Female | 158 | 76  | 121 | 95 | Yes       |
| 76 | Female | 178 | 76  | 110 | 99 | Yes       |
| 24 | Female | 172 | 97  | 90  | 99 | No        |
| 82 | Male   | 171 | 70  | 121 | 80 | Yes       |

|    |        |     |     |     |     |           |
|----|--------|-----|-----|-----|-----|-----------|
| 28 | Male   | 166 | 70  | 114 | 83  | Not Known |
| 29 | Male   | 173 | 90  | 129 | 78  | No        |
| 29 | Male   | 175 | 67  | 130 | 86  | Yes       |
| 30 | Male   | 172 | 87  | 101 | 88  | Yes       |
| 30 | Male   | 166 | 90  | 105 | 88  | No        |
| 30 | Male   | 168 | 68  | 154 | 88  | No        |
| 29 | Female | 152 | 51  | 152 | 70  | Yes       |
| 25 | Male   | 174 | 86  | 94  | 74  | Yes       |
| 25 | Female | 166 | 70  | 91  | 95  | No        |
| 25 | Male   | 158 | 62  | 92  | 82  | Yes       |
| 25 | Female | 172 | 71  | 93  | 84  | No        |
| 25 | Male   | 178 | 98  | 91  | 95  | Yes       |
| 25 | Female | 168 | 71  | 91  | 100 | No        |
| 25 | Male   | 176 | 90  | 92  | 80  | No        |
| 25 | Female | 167 | 65  | 100 | 80  | No        |
| 25 | Male   | 165 | 64  | 93  | 83  | No        |
| 25 | Male   | 149 | 72  | 95  | 90  | Yes       |
| 25 | Female | 158 | 70  | 97  | 78  | Not Known |
| 25 | Female | 157 | 61  | 94  | 87  | No        |
| 25 | Female | 159 | 78  | 92  | 92  | Yes       |
| 25 | Female | 155 | 62  | 97  | 82  | No        |
| 25 | Female | 158 | 75  | 123 | 80  | No        |
| 27 | Female | 170 | 68  | 100 | 80  | No        |
| 27 | Female | 176 | 88  | 127 | 98  | Not Known |
| 27 | Female | 153 | 52  | 109 | 81  | No        |
| 25 | Female | 157 | 71  | 152 | 66  | Yes       |
| 28 | Female | 165 | 69  | 118 | 95  | Yes       |
| 29 | Female | 154 | 72  | 142 | 77  | Not Known |
| 29 | Female | 152 | 75  | 152 | 87  | No        |
| 29 | Female | 158 | 60  | 145 | 82  | No        |
| 29 | Female | 152 | 58  | 128 | 92  | Yes       |
| 30 | Female | 153 | 52  | 120 | 88  | No        |
| 30 | Female | 154 | 58  | 118 | 66  | Not Known |
| 30 | Female | 158 | 55  | 142 | 89  | Yes       |
| 25 | Female | 148 | 53  | 92  | 78  | Yes       |
| 32 | Male   | 170 | 75  | 118 | 88  | Not Known |
| 32 | Male   | 176 | 101 | 106 | 95  | No        |
| 32 | Male   | 181 | 100 | 140 | 80  | Yes       |
| 33 | Male   | 175 | 103 | 125 | 98  | No        |
| 33 | Female | 165 | 72  | 114 | 91  | Yes       |
| 33 | Male   | 180 | 85  | 118 | 68  | No        |
| 33 | Male   | 152 | 55  | 110 | 90  | No        |
| 36 | Male   | 152 | 65  | 120 | 70  | No        |
| 36 | Female | 158 | 75  | 128 | 75  | Yes       |
| 36 | Male   | 180 | 105 | 128 | 85  | Not Known |
| 33 | Male   | 180 | 102 | 99  | 69  | Yes       |
| 36 | Female | 174 | 98  | 130 | 75  | No        |

|    |        |     |     |     |    |           |
|----|--------|-----|-----|-----|----|-----------|
| 79 | Female | 179 | 90  | 142 | 81 | Not Known |
| 79 | Female | 165 | 98  | 145 | 78 | Not Known |
| 75 | Female | 180 | 64  | 109 | 77 | Not Known |
| 23 | Female | 138 | 65  | 90  | 98 | No        |
| 23 | Male   | 179 | 100 | 94  | 67 | Not Known |
| 23 | Female | 148 | 62  | 95  | 71 | No        |
| 34 | Female | 171 | 94  | 122 | 82 | Yes       |
| 36 | Female | 181 | 103 | 152 | 79 | No        |
| 43 | Female | 175 | 90  | 120 | 94 | No        |
| 43 | Male   | 156 | 74  | 118 | 92 | Yes       |
| 44 | Male   | 170 | 73  | 152 | 72 | Yes       |
| 45 | Female | 178 | 98  | 134 | 79 | No        |
| 47 | Female | 178 | 101 | 137 | 83 | No        |
| 47 | Female | 181 | 91  | 141 | 88 | No        |
| 49 | Male   | 157 | 94  | 122 | 66 | No        |
| 49 | Female | 180 | 101 | 132 | 86 | No        |
| 50 | Male   | 178 | 94  | 121 | 85 | No        |
| 50 | Female | 172 | 60  | 142 | 79 | No        |
| 50 | Female | 170 | 94  | 138 | 72 | No        |
| 52 | Female | 176 | 97  | 125 | 77 | Yes       |
| 52 | Female | 175 | 102 | 128 | 78 | No        |
| 52 | Male   | 173 | 93  | 121 | 80 | Yes       |
| 52 | Female | 174 | 91  | 104 | 87 | No        |
| 54 | Female | 181 | 93  | 132 | 89 | No        |
| 55 | Female | 177 | 102 | 132 | 90 | No        |
| 55 | Female | 166 | 84  | 128 | 76 | Not Known |
| 55 | Female | 160 | 67  | 108 | 79 | Yes       |
| 55 | Male   | 164 | 88  | 102 | 85 | No        |
| 55 | Female | 160 | 71  | 148 | 75 | No        |
| 56 | Male   | 170 | 94  | 121 | 90 | No        |
| 56 | Male   | 155 | 81  | 137 | 88 | No        |
| 56 | Female | 172 | 103 | 142 | 90 | No        |
| 57 | Female | 170 | 65  | 99  | 99 | No        |
| 57 | Female | 169 | 86  | 145 | 71 | Yes       |
| 57 | Male   | 175 | 58  | 129 | 78 | No        |
| 57 | Female | 177 | 80  | 142 | 90 | Yes       |
| 57 | Female | 167 | 90  | 129 | 65 | No        |
| 58 | Female | 178 | 95  | 132 | 85 | No        |
| 58 | Female | 178 | 91  | 123 | 81 | No        |
| 58 | Female | 165 | 77  | 145 | 73 | Yes       |
| 59 | Female | 172 | 91  | 152 | 74 | Yes       |
| 59 | Male   | 158 | 49  | 108 | 88 | No        |
| 59 | Female | 158 | 66  | 90  | 80 | Yes       |
| 59 | Female | 180 | 105 | 99  | 66 | No        |
| 59 | Male   | 168 | 88  | 114 | 69 | No        |
| 59 | Male   | 161 | 70  | 117 | 92 | No        |
| 60 | Male   | 164 | 67  | 120 | 77 | No        |



|    |        |     |     |     |    |           |
|----|--------|-----|-----|-----|----|-----------|
| 60 | Male   | 165 | 69  | 120 | 95 | Yes       |
| 60 | Male   | 160 | 101 | 113 | 67 | No        |
| 60 | Female | 167 | 72  | 118 | 88 | Yes       |
| 60 | Male   | 178 | 104 | 120 | 68 | No        |
| 61 | Male   | 145 | 85  | 120 | 71 | No        |
| 61 | Male   | 165 | 79  | 109 | 73 | No        |
| 61 | Male   | 167 | 87  | 118 | 91 | Yes       |
| 61 | Female | 178 | 73  | 112 | 75 | Yes       |
| 61 | Male   | 167 | 98  | 116 | 79 | No        |
| 62 | Male   | 174 | 83  | 120 | 80 | No        |
| 62 | Female | 152 | 59  | 110 | 88 | No        |
| 62 | Male   | 156 | 73  | 101 | 90 | No        |
| 62 | Male   | 178 | 89  | 123 | 92 | No        |
| 62 | Male   | 156 | 48  | 129 | 98 | Yes       |
| 62 | Male   | 161 | 81  | 130 | 95 | No        |
| 62 | Male   | 178 | 79  | 131 | 90 | No        |
| 62 | Male   | 162 | 70  | 142 | 85 | No        |
| 62 | Female | 169 | 119 | 145 | 88 | No        |
| 62 | Female | 179 | 92  | 152 | 71 | Yes       |
| 63 | Female | 181 | 98  | 110 | 75 | Yes       |
| 63 | Male   | 154 | 92  | 101 | 77 | Yes       |
| 63 | Male   | 160 | 86  | 121 | 90 | No        |
| 63 | Male   | 161 | 89  | 125 | 88 | No        |
| 63 | Female | 172 | 76  | 128 | 89 | Yes       |
| 63 | Female | 179 | 86  | 129 | 92 | No        |
| 63 | Male   | 165 | 126 | 129 | 82 | No        |
| 63 | Male   | 162 | 65  | 132 | 87 | Yes       |
| 63 | Female | 160 | 52  | 145 | 81 | No        |
| 63 | Female | 155 | 61  | 132 | 82 | Yes       |
| 63 | Female | 180 | 86  | 133 | 95 | No        |
| 63 | Female | 170 | 79  | 138 | 69 | Yes       |
| 63 | Female | 180 | 100 | 136 | 97 | No        |
| 63 | Female | 180 | 92  | 139 | 95 | Yes       |
| 63 | Female | 170 | 60  | 152 | 73 | No        |
| 64 | Female | 161 | 97  | 102 | 91 | Yes       |
| 64 | Male   | 163 | 73  | 101 | 80 | No        |
| 64 | Female | 164 | 60  | 121 | 78 | No        |
| 64 | Male   | 157 | 64  | 120 | 87 | Yes       |
| 64 | Female | 175 | 78  | 130 | 90 | Not Known |
| 64 | Male   | 157 | 97  | 131 | 95 | No        |
| 64 | Female | 170 | 89  | 133 | 92 | Not Known |
| 64 | Male   | 163 | 81  | 137 | 97 | No        |
| 64 | Female | 177 | 102 | 129 | 90 | Not Known |
| 64 | Female | 160 | 73  | 132 | 97 | Yes       |
| 64 | Female | 179 | 116 | 144 | 90 | Not Known |
| 64 | Male   | 176 | 84  | 142 | 91 | No        |
| 64 | Female | 172 | 107 | 139 | 90 | Yes       |

|    |        |     |     |     |    |           |
|----|--------|-----|-----|-----|----|-----------|
| 65 | Male   | 153 | 83  | 101 | 80 | Yes       |
| 65 | Male   | 178 | 80  | 110 | 85 | No        |
| 65 | Male   | 157 | 99  | 112 | 88 | Yes       |
| 65 | Male   | 167 | 77  | 124 | 86 | No        |
| 65 | Female | 172 | 98  | 120 | 87 | No        |
| 65 | Female | 179 | 100 | 118 | 89 | No        |
| 65 | Male   | 161 | 78  | 135 | 92 | Yes       |
| 65 | Male   | 164 | 79  | 138 | 95 | No        |
| 65 | Female | 174 | 88  | 140 | 97 | No        |
| 65 | Female | 181 | 78  | 141 | 88 | Yes       |
| 66 | Female | 175 | 64  | 99  | 68 | No        |
| 66 | Female | 178 | 85  | 95  | 77 | No        |
| 66 | Male   | 175 | 99  | 105 | 95 | Not Known |
| 66 | Female | 180 | 94  | 130 | 76 | Not Known |
| 66 | Female | 179 | 86  | 132 | 79 | No        |
| 66 | Male   | 170 | 79  | 134 | 73 | No        |
| 66 | Female | 181 | 78  | 128 | 71 | Yes       |
| 66 | Male   | 167 | 80  | 129 | 75 | Not Known |
| 66 | Female | 171 | 86  | 130 | 82 | No        |
| 66 | Male   | 167 | 68  | 145 | 80 | Not Known |
| 67 | Male   | 155 | 66  | 118 | 85 | No        |
| 67 | Female | 170 | 80  | 117 | 75 | No        |
| 67 | Male   | 158 | 59  | 116 | 74 | Yes       |
| 67 | Male   | 161 | 78  | 109 | 73 | No        |
| 67 | Female | 177 | 121 | 132 | 71 | No        |
| 67 | Male   | 151 | 74  | 135 | 90 | Yes       |
| 67 | Female | 172 | 75  | 139 | 90 | Yes       |
| 67 | Female | 177 | 97  | 129 | 92 | No        |
| 68 | Female | 160 | 97  | 101 | 68 | No        |
| 68 | Male   | 157 | 77  | 102 | 75 | No        |
| 68 | Female | 165 | 65  | 110 | 71 | No        |
| 68 | Female | 176 | 97  | 108 | 72 | Yes       |
| 68 | Female | 174 | 78  | 105 | 79 | Not Known |
| 68 | Female | 167 | 82  | 120 | 77 | Yes       |
| 68 | Male   | 167 | 58  | 121 | 85 | No        |
| 68 | Male   | 160 | 75  | 102 | 88 | No        |
| 68 | Male   | 157 | 62  | 101 | 95 | Not Known |
| 68 | Male   | 158 | 87  | 101 | 92 | Not Known |
| 68 | Male   | 162 | 74  | 142 | 91 | No        |
| 68 | Female | 177 | 78  | 121 | 97 | No        |
| 68 | Female | 165 | 77  | 148 | 71 | Not Known |
| 68 | Female | 179 | 95  | 145 | 75 | Yes       |
| 68 | Female | 180 | 105 | 101 | 97 | Not Known |
| 59 | Male   | 176 | 66  | 148 | 71 | Yes       |
| 54 | Male   | 178 | 86  | 145 | 99 | Yes       |
| 65 | Female | 179 | 81  | 109 | 80 | Yes       |
| 43 | Female | 145 | 83  | 152 | 78 | Yes       |

|    |        |     |    |     |    |     |
|----|--------|-----|----|-----|----|-----|
| 41 | Female | 146 | 69 | 108 | 95 | Yes |
| 42 | Female | 165 | 80 | 128 | 88 | No  |
| 59 | Male   | 155 | 90 | 121 | 94 | Yes |
| 64 | Male   | 152 | 89 | 111 | 72 | Yes |
| 58 | Male   | 150 | 88 | 105 | 94 | No  |
| 70 | Male   | 151 | 63 | 122 | 87 | Yes |
| 51 | Female | 145 | 94 | 149 | 78 | Yes |
| 59 | Male   | 149 | 79 | 110 | 87 | Yes |
| 37 | Female | 145 | 81 | 135 | 80 | Yes |
| 54 | Male   | 148 | 82 | 134 | 84 | Yes |
| 57 | Female | 152 | 76 | 145 | 71 | Yes |
| 64 | Female | 157 | 78 | 147 | 81 | Yes |
| 47 | Male   | 156 | 65 | 145 | 78 | Yes |
| 44 | Male   | 178 | 73 | 145 | 75 | No  |
| 48 | Male   | 177 | 83 | 152 | 77 | Yes |
| 60 | Female | 178 | 84 | 121 | 91 | Yes |
| 51 | Male   | 178 | 82 | 111 | 88 | No  |
| 42 | Male   | 177 | 76 | 109 | 85 | Yes |
| 65 | Male   | 177 | 79 | 102 | 95 | No  |
| 35 | Male   | 145 | 78 | 101 | 71 | Yes |
| 41 | Female | 156 | 69 | 109 | 88 | Yes |
| 41 | Male   | 176 | 69 | 108 | 81 | Yes |
| 68 | Female | 178 | 67 | 121 | 75 | Yes |
| 62 | Male   | 169 | 66 | 118 | 78 | Yes |
| 58 | Male   | 174 | 63 | 123 | 68 | Yes |
| 53 | Male   | 165 | 58 | 132 | 81 | No  |
| 44 | Male   | 168 | 56 | 134 | 90 | Yes |
| 58 | Female | 165 | 67 | 151 | 80 | Yes |
| 62 | Male   | 176 | 58 | 120 | 69 | No  |
| 70 | Male   | 178 | 61 | 134 | 88 | Yes |
| 65 | Female | 165 | 63 | 111 | 68 | No  |
| 34 | Female | 153 | 67 | 108 | 73 | Yes |
| 43 | Male   | 153 | 78 | 135 | 85 | Yes |
| 49 | Male   | 155 | 79 | 110 | 88 | Yes |
| 59 | Female | 156 | 92 | 112 | 97 | Yes |
| 60 | Male   | 157 | 54 | 110 | 78 | Yes |
| 58 | Female | 156 | 55 | 95  | 85 | Yes |
| 43 | Female | 157 | 59 | 142 | 66 | No  |
| 55 | Female | 158 | 61 | 98  | 87 | Yes |
| 46 | Male   | 159 | 61 | 132 | 75 | Yes |
| 58 | Female | 161 | 89 | 121 | 78 | No  |
| 34 | Male   | 165 | 89 | 102 | 88 | Yes |
| 44 | Male   | 166 | 90 | 107 | 80 | No  |
| 59 | Female | 176 | 60 | 101 | 91 | Yes |
| 67 | Male   | 171 | 66 | 101 | 89 | Yes |
| 54 | Female | 172 | 64 | 120 | 78 | Yes |
| 41 | Female | 143 | 67 | 125 | 82 | Yes |

|    |        |     |    |     |    |     |
|----|--------|-----|----|-----|----|-----|
| 59 | Male   | 147 | 61 | 110 | 81 | Yes |
| 54 | Male   | 149 | 62 | 134 | 88 | Yes |
| 59 | Male   | 156 | 70 | 148 | 75 | No  |
| 59 | Male   | 155 | 62 | 141 | 95 | Yes |
| 57 | Male   | 154 | 71 | 129 | 74 | Yes |
| 60 | Male   | 152 | 75 | 130 | 92 | No  |
| 60 | Female | 151 | 72 | 145 | 83 | Yes |
| 48 | Male   | 153 | 70 | 134 | 88 | No  |
| 53 | Male   | 158 | 67 | 134 | 95 | Yes |
| 59 | Male   | 169 | 66 | 128 | 92 | Yes |
| 48 | Male   | 177 | 79 | 132 | 80 | Yes |
| 60 | Male   | 178 | 89 | 120 | 78 | Yes |
| 70 | Female | 177 | 90 | 120 | 89 | Yes |
| 70 | Female | 176 | 93 | 101 | 81 | Yes |
| 52 | Female | 167 | 94 | 142 | 84 | No  |
| 62 | Female | 178 | 87 | 120 | 71 | Yes |
| 44 | Male   | 179 | 49 | 140 | 99 | Yes |
| 58 | Female | 174 | 58 | 120 | 80 | No  |
| 63 | Female | 167 | 84 | 104 | 78 | Yes |
| 42 | Female | 168 | 88 | 142 | 87 | Yes |
| 54 | Female | 156 | 94 | 121 | 88 | Yes |
| 34 | Female | 159 | 91 | 99  | 94 | Yes |
| 52 | Female | 180 | 68 | 118 | 88 | Yes |
| 44 | Female | 174 | 88 | 120 | 88 | Yes |
| 62 | Female | 173 | 69 | 148 | 82 | Yes |
| 47 | Male   | 156 | 81 | 119 | 71 | Yes |
| 57 | Female | 154 | 83 | 101 | 92 | No  |
| 41 | Female | 154 | 85 | 139 | 84 | Yes |
| 56 | Female | 157 | 76 | 118 | 81 | Yes |
| 41 | Female | 159 | 71 | 105 | 88 | No  |
| 50 | Female | 140 | 72 | 121 | 94 | Yes |
| 38 | Female | 152 | 77 | 149 | 75 | No  |
| 49 | Male   | 152 | 82 | 142 | 79 | No  |
| 43 | Male   | 150 | 81 | 142 | 80 | Yes |
| 46 | Female | 151 | 81 | 104 | 86 | Yes |
| 41 | Male   | 145 | 84 | 105 | 86 | Yes |
| 57 | Male   | 149 | 67 | 98  | 71 | Yes |
| 66 | Male   | 145 | 78 | 121 | 90 | Yes |
| 55 | Male   | 148 | 76 | 145 | 95 | Yes |
| 43 | Male   | 152 | 75 | 134 | 65 | No  |
| 54 | Male   | 157 | 75 | 118 | 80 | Yes |
| 53 | Female | 156 | 67 | 152 | 85 | Yes |
| 57 | Female | 178 | 65 | 101 | 85 | No  |
| 35 | Female | 166 | 80 | 132 | 75 | Yes |
| 57 | Female | 178 | 81 | 152 | 76 | No  |
| 42 | Male   | 178 | 82 | 100 | 88 | Yes |
| 35 | Male   | 173 | 69 | 120 | 77 | Yes |

|    |        |     |    |     |    |     |
|----|--------|-----|----|-----|----|-----|
| 56 | Female | 177 | 65 | 151 | 68 | Yes |
| 39 | Male   | 145 | 62 | 121 | 69 | Yes |
| 35 | Male   | 156 | 61 | 99  | 81 | Yes |
| 45 | Male   | 176 | 60 | 95  | 83 | Yes |
| 57 | Male   | 178 | 65 | 111 | 88 | No  |
| 43 | Female | 169 | 61 | 108 | 95 | Yes |
| 47 | Female | 174 | 62 | 121 | 92 | Yes |
| 52 | Female | 178 | 59 | 102 | 80 | No  |
| 58 | Male   | 172 | 58 | 152 | 78 | Yes |
| 51 | Male   | 165 | 81 | 121 | 89 | No  |
| 39 | Male   | 176 | 71 | 142 | 81 | Yes |
| 29 | Male   | 178 | 72 | 131 | 95 | Yes |
| 67 | Female | 165 | 78 | 148 | 71 | Yes |
| 68 | Male   | 153 | 79 | 130 | 85 | Yes |
| 44 | Male   | 153 | 87 | 129 | 80 | Yes |
| 57 | Male   | 155 | 88 | 108 | 78 | Yes |
| 63 | Male   | 156 | 83 | 135 | 95 | No  |
| 60 | Male   | 157 | 45 | 120 | 88 | Yes |
| 56 | Female | 156 | 56 | 140 | 84 | Yes |
| 62 | Female | 157 | 67 | 150 | 72 | No  |
| 60 | Female | 158 | 71 | 112 | 94 | Yes |
| 45 | Female | 159 | 71 | 142 | 87 | No  |
| 52 | Male   | 161 | 75 | 138 | 95 | Yes |
| 59 | Male   | 165 | 67 | 114 | 87 | Yes |
| 44 | Male   | 166 | 87 | 131 | 80 | Yes |
| 58 | Male   | 176 | 69 | 142 | 84 | Yes |
| 60 | Male   | 171 | 67 | 151 | 71 | Yes |
| 57 | Female | 172 | 59 | 132 | 95 | Yes |
| 56 | Male   | 143 | 81 | 138 | 78 | No  |
| 70 | Male   | 147 | 65 | 101 | 75 | Yes |
| 57 | Male   | 149 | 68 | 110 | 77 | Yes |
| 59 | Male   | 156 | 61 | 108 | 99 | No  |
| 59 | Male   | 155 | 60 | 104 | 88 | Yes |
| 51 | Male   | 154 | 59 | 101 | 85 | No  |
| 52 | Male   | 152 | 54 | 145 | 95 | Yes |
| 51 | Female | 151 | 51 | 110 | 71 | Yes |
| 57 | Female | 153 | 55 | 132 | 88 | Yes |
| 46 | Male   | 158 | 51 | 132 | 81 | Yes |
| 38 | Male   | 169 | 56 | 123 | 75 | Yes |
| 43 | Female | 166 | 78 | 129 | 78 | Yes |
| 70 | Female | 178 | 66 | 118 | 68 | No  |
| 44 | Female | 177 | 76 | 142 | 81 | Yes |
| 68 | Female | 176 | 77 | 131 | 90 | Yes |
| 54 | Male   | 167 | 65 | 95  | 80 | No  |
| 61 | Male   | 178 | 67 | 131 | 69 | Yes |
| 60 | Male   | 179 | 71 | 142 | 88 | No  |
| 41 | Male   | 174 | 72 | 138 | 68 | Yes |

|    |        |     |    |     |    |     |
|----|--------|-----|----|-----|----|-----|
| 41 | Male   | 167 | 77 | 105 | 73 | Yes |
| 62 | Female | 168 | 79 | 102 | 85 | Yes |
| 70 | Female | 156 | 75 | 128 | 88 | Yes |
| 41 | Female | 159 | 56 | 130 | 97 | Yes |
| 49 | Female | 180 | 56 | 122 | 78 | Yes |
| 62 | Female | 174 | 74 | 104 | 85 | No  |
| 44 | Male   | 173 | 67 | 120 | 66 | Yes |
| 44 | Male   | 156 | 61 | 108 | 87 | Yes |
| 51 | Female | 154 | 65 | 144 | 75 | No  |
| 59 | Male   | 154 | 76 | 105 | 78 | Yes |
| 61 | Male   | 157 | 49 | 124 | 88 | No  |
| 58 | Male   | 159 | 49 | 112 | 80 | Yes |
| 41 | Female | 140 | 55 | 140 | 81 | Yes |
| 68 | Male   | 152 | 51 | 152 | 89 | Yes |
| 60 | Male   | 155 | 58 | 112 | 78 | Yes |
| 44 | Male   | 145 | 58 | 114 | 82 | Yes |
| 57 | Male   | 146 | 56 | 118 | 81 | Yes |
| 49 | Female | 165 | 71 | 132 | 88 | No  |
| 64 | Male   | 148 | 77 | 108 | 75 | Yes |
| 61 | Male   | 153 | 76 | 132 | 95 | Yes |
| 52 | Female | 154 | 69 | 145 | 74 | No  |
| 60 | Female | 165 | 66 | 149 | 75 | Yes |
| 66 | Male   | 166 | 72 | 99  | 83 | No  |
| 47 | Female | 178 | 73 | 90  | 88 | Yes |
| 61 | Female | 179 | 68 | 111 | 95 | Yes |
| 54 | Female | 144 | 69 | 134 | 92 | Yes |
| 41 | Male   | 165 | 56 | 104 | 80 | Yes |
| 64 | Male   | 167 | 56 | 149 | 78 | Yes |
| 43 | Female | 156 | 51 | 121 | 89 | Yes |
| 42 | Female | 155 | 65 | 107 | 81 | No  |
| 51 | Male   | 176 | 65 | 120 | 88 | Yes |
| 54 | Male   | 178 | 62 | 118 | 95 | Yes |
| 47 | Male   | 179 | 69 | 142 | 92 | No  |
| 48 | Male   | 145 | 70 | 121 | 80 | Yes |
| 62 | Male   | 146 | 71 | 140 | 78 | No  |
| 42 | Male   | 165 | 81 | 132 | 89 | Yes |
| 58 | Male   | 155 | 83 | 120 | 81 | Yes |
| 56 | Male   | 152 | 83 | 135 | 95 | Yes |
| 58 | Male   | 150 | 84 | 123 | 71 | Yes |
| 53 | Male   | 151 | 84 | 101 | 88 | Yes |
| 68 | Male   | 145 | 78 | 141 | 80 | Yes |
| 42 | Male   | 149 | 77 | 133 | 78 | No  |
| 59 | Male   | 145 | 71 | 132 | 95 | Yes |
| 41 | Male   | 148 | 77 | 147 | 88 | Yes |
| 41 | Male   | 152 | 70 | 137 | 94 | No  |
| 35 | Male   | 157 | 73 | 118 | 72 | Yes |
| 56 | Male   | 156 | 69 | 147 | 94 | No  |

|    |        |     |    |     |    |     |
|----|--------|-----|----|-----|----|-----|
| 47 | Female | 178 | 66 | 120 | 87 | Yes |
| 40 | Male   | 166 | 86 | 120 | 95 | Yes |
| 54 | Female | 178 | 81 | 114 | 87 | Yes |
| 59 | Male   | 178 | 83 | 149 | 80 | Yes |
| 60 | Female | 176 | 69 | 138 | 84 | Yes |
| 48 | Male   | 177 | 70 | 121 | 71 | Yes |
| 54 | Female | 145 | 71 | 131 | 95 | Yes |
| 58 | Female | 156 | 71 | 138 | 78 | Yes |
| 58 | Female | 176 | 67 | 120 | 75 | No  |
| 42 | Male   | 179 | 68 | 121 | 77 | Yes |
| 68 | Male   | 169 | 66 | 110 | 72 | Yes |
| 65 | Male   | 174 | 67 | 126 | 88 | Yes |
| 54 | Female | 171 | 60 | 121 | 85 | No  |
| 43 | Female | 169 | 66 | 114 | 95 | Yes |
| 62 | Female | 165 | 67 | 129 | 90 | Yes |
| 56 | Male   | 176 | 64 | 130 | 90 | Yes |
| 43 | Female | 178 | 72 | 101 | 84 | No  |
| 64 | Male   | 165 | 73 | 105 | 88 | Yes |
| 62 | Male   | 153 | 59 | 136 | 82 | Yes |
| 50 | Male   | 153 | 81 | 152 | 66 | Yes |
| 50 | Male   | 155 | 82 | 145 | 89 | No  |
| 57 | Female | 156 | 85 | 100 | 78 | Yes |
| 42 | Female | 157 | 66 | 122 | 82 | Yes |
| 67 | Female | 156 | 72 | 102 | 92 | Yes |
| 43 | Male   | 157 | 79 | 101 | 79 | No  |
| 66 | Male   | 158 | 74 | 145 | 80 | Yes |
| 44 | Male   | 159 | 76 | 109 | 86 | Yes |
| 58 | Male   | 161 | 87 | 120 | 81 | Yes |
| 67 | Male   | 165 | 90 | 125 | 80 | No  |
| 57 | Female | 166 | 83 | 142 | 88 | Yes |
| 56 | Male   | 176 | 76 | 97  | 90 | Yes |
| 58 | Male   | 171 | 80 | 128 | 92 | Yes |
| 39 | Male   | 172 | 76 | 120 | 98 | No  |
| 40 | Male   | 143 | 68 | 97  | 95 | Yes |
| 68 | Male   | 147 | 64 | 123 | 90 | Yes |
| 64 | Male   | 149 | 67 | 100 | 85 | Yes |
| 59 | Male   | 156 | 63 | 127 | 88 | Yes |
| 58 | Female | 155 | 59 | 109 | 89 | Yes |
| 29 | Male   | 154 | 61 | 152 | 75 | Yes |
| 71 | Female | 152 | 76 | 118 | 77 | No  |
| 60 | Male   | 151 | 72 | 142 | 90 | Yes |
| 50 | Male   | 153 | 89 | 99  | 88 | Yes |
| 53 | Female | 158 | 90 | 98  | 89 | No  |
| 59 | Male   | 169 | 88 | 102 | 92 | No  |
| 65 | Female | 166 | 68 | 101 | 82 | No  |
| 56 | Male   | 179 | 76 | 100 | 87 | Yes |
| 42 | Male   | 177 | 59 | 115 | 81 | Yes |

|    |        |     |    |     |    |     |
|----|--------|-----|----|-----|----|-----|
| 62 | Male   | 176 | 79 | 114 | 82 | No  |
| 50 | Male   | 167 | 80 | 120 | 95 | No  |
| 45 | Female | 178 | 67 | 123 | 89 | Yes |
| 58 | Male   | 179 | 76 | 132 | 97 | Yes |
| 76 | Female | 174 | 68 | 111 | 95 | No  |
| 59 | Male   | 167 | 69 | 120 | 80 | Yes |
| 62 | Female | 168 | 64 | 151 | 91 | No  |
| 53 | Male   | 156 | 92 | 142 | 80 | Yes |
| 42 | Female | 159 | 90 | 123 | 78 | Yes |
| 60 | Male   | 180 | 89 | 132 | 87 | Yes |
| 64 | Female | 174 | 88 | 128 | 90 | Yes |
| 61 | Male   | 173 | 79 | 99  | 95 | No  |
| 54 | Male   | 156 | 94 | 135 | 92 | Yes |
| 65 | Male   | 154 | 79 | 124 | 97 | Yes |
| 55 | Male   | 154 | 81 | 120 | 90 | Yes |
| 67 | Female | 157 | 82 | 125 | 97 | Yes |
| 58 | Male   | 159 | 76 | 132 | 93 | Yes |
| 46 | Female | 140 | 78 | 125 | 91 | Yes |
| 40 | Female | 152 | 75 | 128 | 95 | Yes |
| 57 | Female | 155 | 73 | 99  | 80 | Yes |
| 46 | Male   | 145 | 83 | 98  | 85 | No  |
| 62 | Female | 146 | 84 | 139 | 88 | Yes |
| 40 | Female | 165 | 82 | 99  | 86 | Yes |
| 44 | Male   | 148 | 76 | 102 | 87 | Yes |
| 42 | Female | 153 | 79 | 108 | 89 | Yes |
| 50 | Female | 154 | 78 | 132 | 71 | Yes |
| 60 | Female | 165 | 82 | 142 | 78 | Yes |
| 69 | Male   | 179 | 86 | 110 | 78 | Yes |
| 38 | Male   | 178 | 62 | 92  | 82 | Yes |
| 66 | Male   | 177 | 69 | 111 | 92 | No  |
| 35 | Female | 145 | 75 | 108 | 79 | No  |
| 42 | Female | 156 | 72 | 102 | 80 | No  |
| 60 | Male   | 176 | 70 | 101 | 86 | Yes |
| 59 | Male   | 179 | 67 | 101 | 74 | Yes |
| 60 | Female | 169 | 66 | 142 | 80 | No  |
| 74 | Male   | 174 | 79 | 121 | 88 | No  |
| 54 | Male   | 177 | 89 | 148 | 90 | Yes |
| 55 | Female | 166 | 90 | 145 | 80 | No  |
| 52 | Male   | 165 | 93 | 101 | 98 | Yes |
| 42 | Male   | 176 | 94 | 108 | 95 | Yes |
| 62 | Female | 178 | 87 | 132 | 90 | No  |
| 56 | Male   | 165 | 49 | 112 | 85 | Yes |
| 44 | Male   | 153 | 58 | 120 | 88 | Yes |
| 59 | Male   | 153 | 84 | 102 | 89 | No  |
| 59 | Male   | 155 | 88 | 121 | 75 | No  |
| 47 | Male   | 156 | 94 | 120 | 77 | No  |
| 56 | Male   | 157 | 91 | 119 | 90 | Yes |



|    |        |     |    |     |    |     |
|----|--------|-----|----|-----|----|-----|
| 67 | Female | 156 | 68 | 123 | 88 | Yes |
| 58 | Male   | 157 | 88 | 98  | 89 | Yes |
| 44 | Female | 158 | 69 | 142 | 82 | Yes |
| 58 | Male   | 159 | 81 | 130 | 82 | Yes |
| 56 | Male   | 161 | 83 | 132 | 87 | No  |
| 62 | Female | 165 | 85 | 96  | 81 | Yes |
| 67 | Male   | 166 | 76 | 120 | 82 | Yes |
| 58 | Female | 176 | 71 | 115 | 95 | Yes |
| 59 | Male   | 171 | 72 | 135 | 98 | No  |
| 54 | Female | 172 | 77 | 98  | 97 | Yes |
| 54 | Female | 143 | 66 | 121 | 95 | No  |
| 58 | Female | 147 | 54 | 131 | 85 | Yes |
| 52 | Female | 149 | 58 | 101 | 91 | No  |
| 60 | Female | 156 | 56 | 135 | 80 | No  |
| 57 | Female | 155 | 67 | 148 | 78 | No  |
| 49 | Female | 154 | 65 | 145 | 87 | Yes |
| 42 | Female | 152 | 68 | 109 | 90 | No  |
| 52 | Male   | 151 | 69 | 152 | 95 | No  |
| 41 | Male   | 153 | 73 | 108 | 92 | No  |
| 67 | Female | 158 | 77 | 128 | 97 | Yes |
| 48 | Male   | 177 | 79 | 121 | 90 | No  |
| 47 | Female | 166 | 61 | 111 | 97 | Yes |
| 58 | Female | 179 | 55 | 105 | 93 | Yes |
| 61 | Male   | 177 | 54 | 122 | 91 | Yes |
| 60 | Female | 176 | 50 | 149 | 77 | Yes |
| 46 | Male   | 167 | 51 | 110 | 95 | No  |
| 46 | Male   | 178 | 55 | 135 | 87 | No  |
| 66 | Female | 179 | 52 | 145 | 81 | Yes |
| 68 | Male   | 174 | 51 | 145 | 84 | Yes |
| 41 | Female | 167 | 65 | 147 | 71 | No  |
| 59 | Male   | 168 | 67 | 145 | 95 | Yes |
| 58 | Male   | 156 | 92 | 145 | 78 | No  |
| 57 | Male   | 159 | 88 | 152 | 75 | Yes |
| 55 | Male   | 180 | 82 | 121 | 77 | Yes |
| 57 | Male   | 174 | 81 | 111 | 99 | Yes |
| 51 | Male   | 173 | 81 | 109 | 88 | No  |
| 40 | Male   | 156 | 84 | 102 | 85 | No  |
| 42 | Female | 154 | 67 | 101 | 95 | No  |
| 49 | Female | 154 | 78 | 109 | 71 | No  |
| 49 | Female | 157 | 77 | 108 | 88 | No  |
| 56 | Male   | 159 | 75 | 121 | 81 | Yes |
| 58 | Female | 140 | 75 | 118 | 75 | No  |
| 69 | Male   | 152 | 67 | 123 | 78 | Yes |
| 59 | Male   | 155 | 65 | 132 | 68 | Yes |
| 48 | Male   | 145 | 80 | 134 | 81 | No  |
| 46 | Female | 146 | 81 | 151 | 90 | Yes |
| 41 | Male   | 165 | 82 | 120 | 80 | Yes |

|    |        |     |    |     |    |     |
|----|--------|-----|----|-----|----|-----|
| 56 | Male   | 148 | 69 | 134 | 69 | Yes |
| 60 | Female | 153 | 65 | 111 | 88 | Yes |
| 65 | Female | 154 | 62 | 108 | 68 | No  |
| 49 | Male   | 165 | 61 | 135 | 73 | Yes |
| 56 | Male   | 166 | 60 | 110 | 85 | Yes |
| 52 | Male   | 177 | 65 | 112 | 88 | No  |
| 59 | Male   | 179 | 61 | 110 | 97 | Yes |
| 61 | Female | 147 | 62 | 95  | 78 | No  |
| 52 | Male   | 165 | 59 | 142 | 85 | Yes |
| 48 | Male   | 167 | 58 | 98  | 66 | No  |
| 60 | Female | 156 | 81 | 132 | 87 | Yes |
| 53 | Female | 155 | 71 | 121 | 75 | No  |
| 58 | Female | 176 | 72 | 102 | 78 | Yes |
| 52 | Female | 178 | 70 | 107 | 88 | No  |
| 59 | Female | 179 | 72 | 101 | 80 | No  |
| 41 | Female | 145 | 87 | 101 | 87 | No  |
| 58 | Female | 146 | 88 | 120 | 84 | No  |
| 64 | Female | 165 | 83 | 125 | 90 | Yes |
| 54 | Female | 155 | 45 | 110 | 82 | Yes |
| 55 | Female | 152 | 56 | 134 | 74 | Yes |
| 68 | Female | 150 | 67 | 148 | 80 | No  |
| 59 | Female | 151 | 71 | 110 | 88 | No  |
| 67 | Female | 145 | 71 | 95  | 85 | No  |
| 54 | Male   | 149 | 75 | 142 | 90 | Yes |
| 42 | Male   | 145 | 67 | 98  | 81 | Yes |
| 70 | Female | 148 | 87 | 132 | 78 | No  |
| 34 | Female | 152 | 69 | 121 | 90 | No  |
| 52 | Male   | 157 | 67 | 102 | 88 | No  |
| 45 | Female | 156 | 59 | 107 | 75 | No  |
| 53 | Female | 178 | 81 | 101 | 91 | No  |
| 52 | Female | 166 | 65 | 101 | 85 | Yes |
| 44 | Female | 177 | 68 | 120 | 74 | Yes |
| 43 | Male   | 179 | 61 | 125 | 75 | No  |
| 58 | Male   | 179 | 60 | 110 | 88 | Yes |
| 39 | Male   | 177 | 59 | 134 | 91 | No  |
| 57 | Male   | 145 | 54 | 148 | 80 | No  |
| 58 | Male   | 156 | 51 | 141 | 78 | No  |
| 37 | Female | 176 | 55 | 129 | 81 | No  |
| 57 | Male   | 179 | 51 | 130 | 80 | No  |
| 69 | Male   | 177 | 56 | 145 | 69 | No  |
| 50 | Female | 174 | 77 | 134 | 91 | Yes |
| 53 | Male   | 155 | 76 | 134 | 88 | Yes |
| 57 | Male   | 154 | 76 | 128 | 90 | Yes |
| 46 | Male   | 165 | 77 | 132 | 88 | No  |
| 37 | Male   | 176 | 65 | 120 | 81 | No  |
| 54 | Male   | 178 | 67 | 120 | 65 | Yes |
| 60 | Male   | 165 | 71 | 101 | 68 | Yes |

|    |        |     |    |     |    |     |
|----|--------|-----|----|-----|----|-----|
| 48 | Male   | 153 | 72 | 142 | 88 | No  |
| 61 | Female | 153 | 77 | 120 | 88 | Yes |
| 46 | Male   | 155 | 79 | 140 | 82 | No  |
| 61 | Male   | 156 | 75 | 120 | 71 | No  |
| 68 | Male   | 157 | 56 | 104 | 92 | Yes |
| 47 | Male   | 156 | 56 | 142 | 84 | Yes |
| 67 | Male   | 157 | 74 | 121 | 81 | Yes |
| 53 | Female | 158 | 67 | 99  | 88 | Yes |
| 70 | Male   | 159 | 61 | 118 | 94 | Yes |
| 43 | Male   | 161 | 65 | 120 | 75 | No  |
| 48 | Male   | 165 | 76 | 148 | 73 | No  |
| 42 | Male   | 166 | 49 | 119 | 81 | No  |
| 42 | Male   | 176 | 49 | 101 | 88 | No  |
| 60 | Male   | 171 | 55 | 139 | 78 | Yes |
| 47 | Male   | 172 | 51 | 118 | 81 | No  |
| 65 | Female | 143 | 58 | 105 | 85 | No  |
| 62 | Female | 147 | 58 | 121 | 71 | No  |
| 62 | Female | 149 | 56 | 149 | 92 | Yes |
| 62 | Female | 156 | 71 | 114 | 75 | No  |
| 74 | Female | 155 | 77 | 114 | 89 | No  |
| 63 | Male   | 154 | 76 | 101 | 92 | Yes |
| 56 | Female | 152 | 69 | 145 | 66 | No  |
| 41 | Male   | 151 | 66 | 135 | 77 | Yes |
| 58 | Female | 153 | 72 | 110 | 90 | No  |
| 35 | Female | 158 | 73 | 104 | 90 | No  |
| 51 | Female | 177 | 79 | 119 | 84 | Yes |
| 64 | Female | 166 | 80 | 152 | 88 | Yes |
| 52 | Female | 179 | 56 | 117 | 82 | Yes |
| 48 | Male   | 177 | 56 | 140 | 66 | No  |
| 60 | Female | 176 | 51 | 138 | 89 | No  |
| 71 | Female | 177 | 65 | 101 | 78 | No  |
| 56 | Female | 152 | 65 | 117 | 82 | No  |
| 54 | Female | 179 | 62 | 123 | 92 | Yes |
| 52 | Male   | 174 | 69 | 135 | 79 | Yes |
| 62 | Female | 167 | 70 | 101 | 80 | No  |
| 38 | Male   | 168 | 71 | 107 | 86 | No  |
| 57 | Male   | 156 | 81 | 123 | 75 | Yes |
| 58 | Male   | 153 | 83 | 148 | 71 | No  |
| 43 | Male   | 180 | 83 | 118 | 90 | No  |
| 59 | Male   | 174 | 84 | 132 | 95 | No  |
| 63 | Male   | 173 | 82 | 109 | 65 | No  |
| 58 | Male   | 156 | 78 | 142 | 80 | Yes |
| 57 | Male   | 154 | 77 | 142 | 85 | Yes |
| 55 | Male   | 154 | 71 | 104 | 85 | Yes |
| 35 | Male   | 157 | 77 | 105 | 75 | Yes |
| 42 | Male   | 159 | 83 | 98  | 76 | Yes |
| 56 | Male   | 160 | 73 | 121 | 88 | No  |

|    |        |     |    |     |    |     |
|----|--------|-----|----|-----|----|-----|
| 63 | Male   | 162 | 69 | 145 | 77 | No  |
| 61 | Male   | 165 | 66 | 149 | 68 | Yes |
| 51 | Male   | 168 | 86 | 118 | 69 | No  |
| 44 | Male   | 167 | 81 | 152 | 74 | Yes |
| 51 | Male   | 169 | 83 | 101 | 78 | Yes |
| 39 | Male   | 140 | 69 | 132 | 84 | No  |
| 62 | Male   | 152 | 85 | 152 | 78 | Yes |
| 61 | Male   | 155 | 71 | 100 | 88 | Yes |
| 58 | Male   | 145 | 71 | 120 | 95 | Yes |
| 50 | Female | 155 | 60 | 112 | 76 | Yes |
| 66 | Female | 152 | 61 | 142 | 66 | Yes |
| 67 | Male   | 150 | 57 | 147 | 84 | Yes |
| 48 | Female | 151 | 57 | 114 | 81 | No  |
| 58 | Male   | 145 | 58 | 131 | 71 | Yes |
| 54 | Male   | 149 | 70 | 142 | 84 | No  |
| 44 | Male   | 145 | 75 | 151 | 92 | No  |
| 65 | Female | 148 | 79 | 132 | 80 | Yes |
| 66 | Female | 152 | 83 | 138 | 88 | No  |
| 67 | Female | 157 | 52 | 101 | 92 | No  |
| 46 | Female | 156 | 65 | 110 | 76 | Yes |
| 49 | Male   | 178 | 67 | 108 | 86 | No  |
| 55 | Female | 166 | 60 | 104 | 69 | No  |
| 63 | Female | 177 | 67 | 101 | 93 | Yes |
| 40 | Female | 179 | 80 | 145 | 90 | Yes |
| 59 | Male   | 180 | 81 | 110 | 74 | No  |
| 43 | Male   | 177 | 83 | 132 | 84 | No  |
| 67 | Male   | 145 | 60 | 132 | 82 | No  |
| 69 | Female | 156 | 61 | 123 | 90 | No  |
| 55 | Male   | 176 | 65 | 129 | 82 | Yes |
| 43 | Male   | 179 | 59 | 118 | 95 | No  |
| 44 | Female | 177 | 57 | 142 | 89 | Yes |
| 52 | Male   | 174 | 59 | 131 | 90 | Yes |
| 57 | Female | 169 | 55 | 95  | 98 | No  |
| 57 | Female | 171 | 50 | 131 | 80 | No  |
| 58 | Male   | 165 | 53 | 142 | 95 | No  |
| 70 | Male   | 176 | 54 | 138 | 99 | No  |
| 35 | Female | 178 | 59 | 105 | 80 | Yes |
| 66 | Male   | 165 | 76 | 102 | 80 | Yes |
| 58 | Male   | 153 | 71 | 128 | 83 | No  |
| 56 | Female | 153 | 68 | 142 | 78 | Yes |
| 58 | Female | 155 | 79 | 122 | 86 | Yes |
| 64 | Female | 156 | 85 | 104 | 88 | Yes |
| 67 | Female | 157 | 88 | 120 | 88 | No  |
| 64 | Male   | 156 | 87 | 108 | 88 | No  |
| 56 | Male   | 157 | 84 | 144 | 70 | No  |
| 59 | Male   | 158 | 82 | 105 | 74 | No  |
| 65 | Male   | 159 | 65 | 124 | 92 | No  |

|    |        |     |    |     |    |     |
|----|--------|-----|----|-----|----|-----|
| 56 | Male   | 161 | 68 | 112 | 87 | Yes |
| 56 | Female | 165 | 76 | 140 | 87 | Yes |
| 63 | Male   | 166 | 87 | 152 | 66 | No  |
| 56 | Male   | 176 | 90 | 112 | 66 | Yes |
| 58 | Female | 171 | 79 | 114 | 80 | Yes |
| 63 | Female | 172 | 78 | 118 | 80 | No  |
| 60 | Male   | 143 | 79 | 132 | 89 | No  |
| 59 | Male   | 147 | 77 | 108 | 82 | Yes |
| 49 | Male   | 149 | 85 | 132 | 78 | No  |
| 64 | Female | 156 | 87 | 132 | 80 | Yes |
| 61 | Female | 155 | 90 | 120 | 90 | No  |
| 47 | Male   | 154 | 83 | 125 | 82 | Yes |
| 44 | Female | 152 | 76 | 110 | 80 | Yes |
| 41 | Male   | 151 | 80 | 134 | 80 | Yes |
| 64 | Female | 153 | 76 | 148 | 82 | Yes |
| 39 | Male   | 158 | 68 | 141 | 81 | No  |
| 67 | Male   | 177 | 64 | 129 | 66 | No  |
| 63 | Male   | 165 | 78 | 101 | 94 | Yes |
| 51 | Male   | 168 | 75 | 145 | 92 | Yes |
| 64 | Male   | 177 | 73 | 135 | 72 | No  |
| 57 | Male   | 179 | 83 | 110 | 79 | No  |
| 52 | Male   | 143 | 84 | 104 | 83 | Yes |
| 45 | Male   | 165 | 82 | 119 | 88 | Yes |
| 59 | Male   | 167 | 76 | 152 | 66 | Yes |
| 46 | Female | 156 | 79 | 117 | 86 | Yes |
| 46 | Female | 155 | 78 | 146 | 85 | No  |
| 41 | Female | 176 | 82 | 138 | 79 | No  |
| 51 | Female | 178 | 83 | 101 | 72 | No  |
| 43 | Female | 179 | 67 | 117 | 77 | Yes |
| 49 | Female | 145 | 66 | 123 | 78 | No  |
| 57 | Female | 146 | 63 | 135 | 80 | No  |
| 56 | Female | 165 | 58 | 101 | 87 | Yes |
| 64 | Female | 155 | 56 | 107 | 89 | No  |
| 42 | Male   | 152 | 67 | 123 | 90 | No  |
| 41 | Male   | 150 | 58 | 148 | 76 | Yes |
| 44 | Male   | 151 | 61 | 118 | 79 | No  |
| 56 | Male   | 145 | 63 | 132 | 85 | No  |
| 61 | Male   | 149 | 67 | 109 | 74 | No  |
| 50 | Male   | 145 | 78 | 142 | 90 | Yes |
| 58 | Male   | 148 | 79 | 142 | 88 | No  |
| 42 | Male   | 152 | 92 | 104 | 95 | No  |
| 59 | Male   | 157 | 54 | 105 | 99 | Yes |
| 43 | Male   | 156 | 55 | 98  | 87 | Yes |
| 52 | Male   | 178 | 59 | 121 | 78 | No  |
| 63 | Male   | 168 | 61 | 145 | 92 | Yes |
| 35 | Male   | 177 | 61 | 149 | 65 | No  |
| 64 | Male   | 179 | 89 | 118 | 88 | Yes |

|    |        |     |    |     |    |     |
|----|--------|-----|----|-----|----|-----|
| 50 | Male   | 180 | 89 | 152 | 94 | Yes |
| 57 | Female | 177 | 90 | 101 | 88 | Yes |
| 60 | Male   | 145 | 60 | 132 | 88 | No  |
| 52 | Male   | 156 | 66 | 152 | 82 | Yes |
| 41 | Male   | 176 | 64 | 100 | 71 | No  |
| 46 | Male   | 179 | 67 | 120 | 92 | Yes |
| 63 | Male   | 177 | 61 | 151 | 84 | Yes |
| 45 | Male   | 174 | 62 | 121 | 81 | Yes |
| 44 | Female | 170 | 86 | 99  | 88 | Yes |
| 62 | Male   | 172 | 62 | 95  | 94 | Yes |
| 58 | Male   | 165 | 88 | 111 | 75 | No  |
| 62 | Female | 176 | 75 | 108 | 73 | Yes |
| 68 | Female | 178 | 72 | 121 | 81 | Yes |
| 41 | Male   | 165 | 70 | 102 | 88 | Yes |
| 57 | Female | 153 | 67 | 152 | 78 | Yes |
| 64 | Female | 153 | 66 | 121 | 81 | No  |
| 57 | Female | 155 | 79 | 142 | 85 | Yes |
| 49 | Female | 156 | 89 | 131 | 71 | No  |
| 52 | Female | 157 | 90 | 148 | 84 | Yes |
| 54 | Female | 156 | 93 | 148 | 75 | Yes |
| 41 | Female | 157 | 94 | 129 | 89 | Yes |
| 62 | Female | 158 | 87 | 108 | 92 | Yes |
| 59 | Male   | 159 | 49 | 135 | 66 | Yes |
| 58 | Male   | 161 | 58 | 120 | 77 | No  |
| 58 | Female | 165 | 84 | 140 | 80 | Yes |
| 50 | Female | 166 | 88 | 150 | 74 | Yes |
| 62 | Female | 176 | 94 | 112 | 84 | Yes |
| 45 | Male   | 171 | 91 | 142 | 88 | Yes |
| 74 | Female | 172 | 68 | 130 | 82 | No  |
| 55 | Male   | 143 | 88 | 114 | 66 | Yes |
| 48 | Male   | 147 | 69 | 131 | 89 | No  |
| 53 | Female | 149 | 81 | 142 | 78 | Yes |
| 60 | Female | 156 | 83 | 151 | 82 | Yes |
| 40 | Male   | 155 | 85 | 132 | 92 | Yes |
| 63 | Male   | 154 | 76 | 138 | 79 | Yes |
| 52 | Male   | 152 | 71 | 101 | 80 | Yes |
| 44 | Male   | 151 | 72 | 110 | 86 | No  |
| 61 | Male   | 153 | 77 | 108 | 66 | Yes |
| 48 | Female | 158 | 66 | 104 | 71 | Yes |
| 66 | Male   | 177 | 54 | 101 | 90 | Yes |
| 62 | Female | 168 | 58 | 145 | 90 | Yes |
| 63 | Female | 179 | 56 | 110 | 65 | No  |
| 64 | Male   | 177 | 67 | 132 | 80 | Yes |
| 64 | Male   | 176 | 65 | 132 | 85 | No  |
| 41 | Male   | 177 | 68 | 123 | 85 | Yes |
| 46 | Female | 178 | 69 | 129 | 75 | Yes |
| 57 | Male   | 179 | 73 | 118 | 76 | Yes |

|    |        |     |    |     |    |     |
|----|--------|-----|----|-----|----|-----|
| 48 | Male   | 174 | 77 | 142 | 88 | Yes |
| 55 | Male   | 167 | 79 | 131 | 77 | Yes |
| 44 | Male   | 168 | 61 | 95  | 68 | No  |
| 55 | Male   | 156 | 55 | 131 | 69 | Yes |
| 48 | Male   | 159 | 54 | 142 | 68 | Yes |
| 61 | Female | 180 | 50 | 138 | 83 | Yes |
| 66 | Male   | 174 | 51 | 105 | 88 | Yes |
| 41 | Male   | 178 | 60 | 139 | 77 | Yes |
| 52 | Male   | 179 | 65 | 132 | 99 | No  |
| 54 | Male   | 145 | 61 | 147 | 88 | Yes |
| 43 | Male   | 146 | 62 | 134 | 85 | No  |
| 41 | Male   | 165 | 59 | 118 | 95 | Yes |
| 63 | Male   | 155 | 58 | 147 | 71 | Yes |
| 60 | Female | 152 | 81 | 120 | 88 | Yes |
| 41 | Male   | 150 | 71 | 120 | 81 | Yes |
| 59 | Male   | 151 | 72 | 114 | 75 | Yes |
| 41 | Female | 145 | 78 | 149 | 71 | No  |
| 57 | Female | 149 | 79 | 138 | 68 | Yes |
| 56 | Female | 145 | 87 | 121 | 81 | Yes |
| 57 | Male   | 148 | 88 | 131 | 90 | Yes |
| 60 | Male   | 152 | 83 | 138 | 80 | Yes |
| 61 | Female | 157 | 45 | 120 | 69 | No  |
| 42 | Female | 156 | 56 | 121 | 88 | Yes |
| 54 | Male   | 178 | 67 | 110 | 68 | No  |
| 49 | Male   | 168 | 71 | 126 | 73 | Yes |
| 54 | Male   | 177 | 71 | 121 | 85 | Yes |
| 69 | Female | 177 | 75 | 114 | 88 | Yes |
| 54 | Male   | 181 | 67 | 129 | 97 | Yes |
| 64 | Female | 177 | 87 | 130 | 78 | Yes |
| 70 | Female | 145 | 69 | 101 | 85 | No  |
| 47 | Male   | 156 | 67 | 105 | 66 | Yes |
| 57 | Female | 176 | 59 | 136 | 87 | Yes |
| 64 | Male   | 177 | 81 | 152 | 75 | Yes |
| 50 | Female | 177 | 65 | 145 | 78 | Yes |
| 40 | Female | 174 | 68 | 100 | 88 | No  |
| 57 | Female | 173 | 61 | 122 | 80 | Yes |
| 37 | Female | 174 | 60 | 102 | 91 | No  |
| 54 | Female | 165 | 59 | 101 | 89 | Yes |
| 49 | Female | 176 | 54 | 145 | 78 | Yes |
| 53 | Female | 178 | 51 | 109 | 82 | Yes |
| 34 | Female | 165 | 55 | 120 | 81 | Yes |
| 51 | Female | 153 | 51 | 125 | 88 | Yes |
| 55 | Male   | 153 | 56 | 142 | 75 | No  |
| 41 | Male   | 155 | 72 | 97  | 95 | Yes |
| 52 | Male   | 156 | 72 | 128 | 74 | Yes |
| 67 | Male   | 157 | 76 | 120 | 92 | Yes |
| 65 | Male   | 156 | 77 | 97  | 83 | Yes |

|    |        |     |    |     |    |     |
|----|--------|-----|----|-----|----|-----|
| 59 | Female | 157 | 65 | 123 | 88 | No  |
| 52 | Male   | 158 | 67 | 100 | 95 | Yes |
| 57 | Male   | 159 | 71 | 127 | 92 | No  |
| 53 | Male   | 161 | 72 | 109 | 80 | Yes |
| 62 | Male   | 165 | 77 | 152 | 78 | Yes |
| 49 | Male   | 166 | 79 | 118 | 89 | Yes |
| 58 | Male   | 176 | 75 | 142 | 81 | Yes |
| 63 | Female | 171 | 56 | 152 | 88 | Yes |
| 46 | Female | 172 | 56 | 145 | 95 | No  |
| 60 | Male   | 143 | 74 | 128 | 92 | Yes |
| 64 | Male   | 147 | 67 | 120 | 80 | Yes |
| 54 | Male   | 149 | 61 | 118 | 78 | Yes |
| 46 | Male   | 156 | 65 | 142 | 89 | Yes |
| 51 | Male   | 155 | 76 | 92  | 81 | No  |
| 57 | Male   | 154 | 49 | 99  | 95 | Yes |
| 58 | Female | 152 | 49 | 98  | 71 | No  |
| 57 | Male   | 151 | 55 | 95  | 99 | Yes |
| 61 | Male   | 153 | 51 | 138 | 80 | Yes |
| 35 | Male   | 158 | 58 | 137 | 78 | Yes |
| 50 | Male   | 177 | 58 | 130 | 95 | Yes |
| 50 | Male   | 168 | 56 | 131 | 88 | Yes |
| 69 | Female | 177 | 71 | 136 | 94 | No  |
| 35 | Female | 177 | 77 | 99  | 72 | Yes |
| 53 | Male   | 176 | 76 | 99  | 94 | Yes |
| 71 | Female | 177 | 69 | 98  | 87 | Yes |
| 49 | Male   | 178 | 66 | 92  | 95 | Yes |
| 39 | Male   | 179 | 72 | 91  | 87 | No  |
| 48 | Male   | 174 | 73 | 120 | 80 | Yes |
| 51 | Male   | 167 | 70 | 123 | 84 | No  |
| 29 | Female | 168 | 60 | 101 | 71 | Yes |
| 39 | Female | 156 | 56 | 104 | 95 | Yes |
| 52 | Female | 159 | 56 | 115 | 78 | Yes |
| 61 | Female | 180 | 51 | 112 | 75 | Yes |
| 67 | Female | 174 | 65 | 102 | 77 | Yes |
| 67 | Female | 173 | 65 | 105 | 99 | No  |
| 49 | Female | 156 | 62 | 108 | 88 | Yes |
| 45 | Male   | 154 | 69 | 107 | 85 | Yes |
| 41 | Male   | 154 | 70 | 106 | 95 | Yes |
| 59 | Male   | 157 | 71 | 109 | 90 | Yes |
| 57 | Male   | 159 | 81 | 111 | 90 | No  |
| 67 | Male   | 140 | 83 | 100 | 84 | Yes |
| 58 | Male   | 152 | 83 | 105 | 88 | No  |
| 34 | Male   | 155 | 84 | 120 | 82 | Yes |
| 57 | Female | 145 | 84 | 132 | 66 | Yes |
| 41 | Female | 146 | 78 | 125 | 89 | Yes |
| 41 | Male   | 165 | 77 | 124 | 78 | Yes |
| 56 | Female | 148 | 71 | 128 | 82 | Yes |



|    |        |     |    |     |    |     |
|----|--------|-----|----|-----|----|-----|
| 56 | Male   | 153 | 77 | 129 | 92 | No  |
| 65 | Female | 154 | 70 | 124 | 79 | Yes |
| 69 | Female | 165 | 73 | 126 | 80 | Yes |
| 53 | Female | 168 | 69 | 121 | 86 | Yes |
| 60 | Male   | 169 | 66 | 122 | 64 | Yes |
| 64 | Male   | 179 | 86 | 132 | 80 | No  |
| 61 | Male   | 149 | 81 | 130 | 88 | Yes |
| 58 | Male   | 165 | 83 | 131 | 90 | No  |
| 60 | Male   | 167 | 69 | 123 | 92 | Yes |
| 59 | Male   | 156 | 65 | 125 | 98 | Yes |
| 52 | Male   | 155 | 71 | 128 | 95 | Yes |
| 42 | Male   | 176 | 71 | 124 | 90 | Yes |
| 56 | Female | 178 | 67 | 129 | 85 | Yes |
| 41 | Female | 179 | 68 | 126 | 88 | No  |
| 60 | Male   | 145 | 66 | 110 | 89 | Yes |
| 67 | Male   | 146 | 67 | 100 | 75 | Yes |
| 65 | Female | 165 | 60 | 102 | 77 | Yes |
| 61 | Female | 155 | 66 | 103 | 90 | Yes |
| 55 | Male   | 152 | 67 | 105 | 88 | No  |
| 62 | Female | 150 | 64 | 108 | 89 | Yes |
| 64 | Male   | 151 | 72 | 107 | 92 | No  |
| 59 | Male   | 145 | 73 | 106 | 82 | Yes |
| 64 | Male   | 149 | 59 | 104 | 87 | Yes |
| 58 | Male   | 145 | 81 | 109 | 81 | Yes |
| 57 | Female | 148 | 82 | 103 | 82 | Yes |
| 52 | Female | 152 | 85 | 102 | 95 | Yes |
| 45 | Male   | 157 | 66 | 108 | 98 | No  |
| 44 | Female | 156 | 58 | 120 | 97 | Yes |
| 58 | Female | 178 | 51 | 111 | 95 | Yes |
| 59 | Female | 168 | 55 | 102 | 98 | Yes |
| 50 | Male   | 169 | 52 | 121 | 91 | Yes |
| 44 | Male   | 177 | 51 | 122 | 80 | No  |
| 66 | Male   | 179 | 65 | 135 | 78 | Yes |
| 66 | Male   | 177 | 67 | 145 | 87 | No  |
| 59 | Male   | 145 | 92 | 152 | 90 | Yes |
| 45 | Female | 156 | 88 | 135 | 95 | Yes |
| 64 | Female | 176 | 82 | 137 | 92 | Yes |
| 44 | Female | 177 | 81 | 138 | 97 | Yes |
| 55 | Male   | 177 | 81 | 129 | 90 | Yes |
| 50 | Female | 174 | 84 | 90  | 97 | No  |
| 58 | Female | 175 | 67 | 99  | 93 | Yes |
| 39 | Female | 176 | 78 | 98  | 91 | Yes |
| 45 | Male   | 165 | 77 | 97  | 95 | Yes |
| 52 | Male   | 176 | 75 | 90  | 80 | Yes |
| 41 | Male   | 178 | 75 | 95  | 85 | No  |
| 66 | Male   | 165 | 67 | 96  | 88 | Yes |
| 69 | Male   | 153 | 65 | 99  | 86 | No  |

|    |        |     |    |     |    |     |
|----|--------|-----|----|-----|----|-----|
| 40 | Male   | 153 | 80 | 97  | 87 | Yes |
| 49 | Female | 155 | 81 | 93  | 89 | Yes |
| 62 | Female | 156 | 82 | 92  | 71 | Yes |
| 60 | Male   | 157 | 69 | 100 | 99 | Yes |
| 61 | Female | 156 | 65 | 110 | 80 | Yes |
| 56 | Female | 157 | 62 | 102 | 78 | No  |
| 57 | Male   | 158 | 61 | 104 | 95 | Yes |
| 68 | Male   | 159 | 60 | 106 | 88 | Yes |
| 55 | Male   | 161 | 65 | 120 | 94 | Yes |
| 44 | Male   | 165 | 61 | 121 | 72 | Yes |
| 29 | Male   | 166 | 62 | 135 | 94 | No  |
| 63 | Male   | 176 | 59 | 142 | 87 | Yes |
| 40 | Male   | 171 | 58 | 152 | 95 | Yes |
| 64 | Female | 172 | 81 | 150 | 87 | Yes |
| 58 | Female | 143 | 71 | 142 | 80 | Yes |
| 55 | Male   | 147 | 72 | 124 | 84 | Yes |
| 59 | Male   | 149 | 59 | 132 | 71 | Yes |
| 59 | Male   | 156 | 56 | 134 | 95 | Yes |
| 50 | Male   | 155 | 87 | 129 | 78 | No  |
| 67 | Male   | 154 | 88 | 127 | 75 | Yes |
| 64 | Male   | 152 | 83 | 125 | 77 | Yes |
| 61 | Male   | 151 | 45 | 102 | 99 | Yes |
| 60 | Male   | 153 | 56 | 105 | 88 | Yes |
| 69 | Male   | 158 | 67 | 123 | 85 | No  |
| 57 | Female | 177 | 71 | 149 | 76 | Yes |
| 64 | Male   | 168 | 71 | 138 | 90 | No  |
| 54 | Female | 177 | 75 | 121 | 90 | Yes |
| 57 | Male   | 177 | 67 | 131 | 84 | Yes |
| 58 | Female | 176 | 87 | 138 | 88 | Yes |
| 55 | Male   | 177 | 69 | 120 | 82 | Yes |
| 45 | Female | 178 | 67 | 121 | 66 | Yes |
| 52 | Male   | 179 | 59 | 110 | 89 | No  |
| 51 | Female | 174 | 81 | 126 | 78 | Yes |
| 67 | Female | 167 | 65 | 121 | 82 | Yes |
| 64 | Male   | 165 | 56 | 97  | 92 | Yes |
| 34 | Male   | 168 | 56 | 123 | 82 | Yes |
| 46 | Female | 169 | 74 | 100 | 87 | Yes |
| 77 | Female | 179 | 67 | 127 | 81 | No  |
| 53 | Female | 148 | 61 | 109 | 82 | Yes |
| 55 | Female | 165 | 65 | 152 | 80 | Yes |
| 58 | Female | 167 | 76 | 118 | 98 | Yes |
| 57 | Female | 156 | 49 | 142 | 90 | Yes |
| 59 | Female | 155 | 49 | 99  | 95 | No  |
| 42 | Female | 176 | 55 | 98  | 98 | Yes |
| 47 | Female | 178 | 51 | 102 | 91 | No  |
| 56 | Male   | 179 | 58 | 101 | 80 | Yes |
| 66 | Female | 145 | 58 | 100 | 78 | Yes |

|    |        |     |     |     |    |     |
|----|--------|-----|-----|-----|----|-----|
| 51 | Female | 146 | 56  | 115 | 87 | Yes |
| 57 | Male   | 165 | 71  | 114 | 90 | Yes |
| 64 | Male   | 155 | 77  | 120 | 95 | Yes |
| 65 | Female | 152 | 76  | 123 | 92 | No  |
| 54 | Female | 150 | 69  | 132 | 97 | Yes |
| 53 | Female | 151 | 66  | 111 | 90 | Yes |
| 66 | Female | 145 | 72  | 120 | 97 | Yes |
| 47 | Female | 149 | 73  | 154 | 88 | Yes |
| 52 | Male   | 145 | 110 | 142 | 91 | Yes |
| 64 | Male   | 148 | 82  | 123 | 87 | Yes |
| 57 | Female | 152 | 56  | 132 | 95 | No  |
| 49 | Male   | 157 | 56  | 128 | 87 | Yes |
| 61 | Female | 156 | 51  | 99  | 80 | Yes |
| 57 | Male   | 178 | 65  | 135 | 84 | Yes |
| 63 | Male   | 168 | 65  | 124 | 71 | Yes |
| 40 | Male   | 169 | 62  | 120 | 95 | Yes |
| 37 | Male   | 177 | 69  | 125 | 78 | No  |
| 48 | Male   | 174 | 70  | 132 | 75 | Yes |
| 60 | Male   | 177 | 71  | 125 | 77 | Yes |
| 66 | Male   | 145 | 81  | 128 | 70 | Yes |
| 56 | Male   | 156 | 83  | 99  | 88 | Yes |
| 44 | Male   | 176 | 83  | 98  | 85 | No  |
| 38 | Male   | 177 | 84  | 150 | 95 | Yes |
| 51 | Male   | 177 | 70  | 99  | 71 | No  |
| 64 | Male   | 174 | 78  | 102 | 88 | Yes |
| 45 | Male   | 178 | 77  | 108 | 81 | Yes |
| 57 | Male   | 177 | 71  | 132 | 75 | Yes |
| 58 | Male   | 165 | 77  | 142 | 78 | Yes |
| 71 | Male   | 176 | 68  | 145 | 68 | Yes |
| 66 | Male   | 178 | 73  | 152 | 81 | Yes |
| 61 | Male   | 165 | 69  | 108 | 90 | Yes |
| 65 | Male   | 153 | 66  | 110 | 80 | No  |
| 39 | Male   | 153 | 86  | 90  | 69 | Yes |
| 51 | Male   | 155 | 81  | 110 | 88 | No  |
| 41 | Male   | 156 | 83  | 110 | 68 | No  |
| 64 | Male   | 157 | 69  | 106 | 73 | Yes |
| 45 | Male   | 156 | 80  | 110 | 85 | No  |
| 58 | Male   | 157 | 52  | 114 | 88 | Yes |
| 35 | Female | 158 | 55  | 109 | 97 | No  |
| 57 | Male   | 159 | 56  | 115 | 78 | Yes |
| 49 | Male   | 161 | 60  | 95  | 85 | Yes |
| 51 | Male   | 165 | 60  | 105 | 66 | No  |
| 60 | Male   | 166 | 61  | 119 | 87 | Yes |
| 39 | Male   | 176 | 57  | 98  | 75 | No  |
| 56 | Male   | 171 | 57  | 104 | 78 | Yes |
| 44 | Male   | 172 | 58  | 117 | 88 | Yes |
| 57 | Female | 143 | 70  | 120 | 80 | Yes |

|    |        |     |    |     |    |     |
|----|--------|-----|----|-----|----|-----|
| 41 | Female | 147 | 75 | 115 | 87 | Yes |
| 54 | Male   | 149 | 79 | 121 | 84 | Yes |
| 44 | Male   | 156 | 83 | 120 | 90 | Yes |
| 50 | Female | 155 | 52 | 123 | 82 | No  |
| 53 | Male   | 154 | 65 | 123 | 74 | Yes |
| 61 | Female | 152 | 67 | 123 | 80 | No  |
| 59 | Male   | 151 | 60 | 122 | 88 | Yes |
| 58 | Male   | 153 | 67 | 124 | 85 | Yes |
| 42 | Female | 158 | 80 | 120 | 90 | No  |
| 64 | Male   | 166 | 81 | 120 | 81 | Yes |
| 60 | Male   | 168 | 83 | 120 | 78 | No  |
| 70 | Male   | 177 | 60 | 124 | 99 | Yes |
| 41 | Male   | 177 | 61 | 123 | 88 | Yes |
| 61 | Female | 176 | 65 | 124 | 75 | Yes |
| 51 | Male   | 177 | 59 | 124 | 91 | Yes |
| 58 | Male   | 178 | 57 | 125 | 85 | No  |
| 63 | Male   | 179 | 59 | 125 | 74 | Yes |
| 52 | Male   | 174 | 55 | 120 | 75 | Yes |
| 63 | Female | 167 | 50 | 125 | 88 | Yes |
| 42 | Male   | 168 | 53 | 126 | 91 | Yes |
| 47 | Male   | 156 | 54 | 126 | 80 | Yes |
| 74 | Female | 159 | 59 | 121 | 78 | Yes |
| 60 | Female | 180 | 76 | 127 | 81 | No  |
| 56 | Female | 174 | 71 | 120 | 80 | Yes |
| 56 | Female | 173 | 68 | 127 | 69 | No  |
| 70 | Male   | 156 | 79 | 127 | 91 | Yes |
| 60 | Female | 154 | 85 | 127 | 88 | Yes |
| 52 | Male   | 154 | 88 | 128 | 90 | No  |
| 41 | Male   | 157 | 87 | 128 | 88 | Yes |
| 59 | Male   | 159 | 84 | 128 | 81 | No  |
| 60 | Female | 140 | 82 | 128 | 65 | Yes |
| 54 | Male   | 152 | 65 | 129 | 68 | Yes |
| 58 | Male   | 155 | 68 | 129 | 88 | Yes |
| 66 | Female | 145 | 76 | 130 | 88 | Yes |
| 49 | Female | 146 | 87 | 142 | 82 | No  |
| 34 | Female | 165 | 90 | 130 | 71 | Yes |
| 41 | Female | 148 | 79 | 130 | 92 | Yes |
| 60 | Female | 153 | 78 | 130 | 84 | Yes |
| 63 | Male   | 154 | 79 | 130 | 81 | Yes |
| 47 | Male   | 165 | 78 | 133 | 88 | Yes |
| 71 | Female | 168 | 74 | 130 | 94 | Yes |
| 44 | Male   | 169 | 87 | 132 | 75 | No  |
| 55 | Female | 179 | 90 | 131 | 73 | Yes |
| 59 | Male   | 140 | 83 | 132 | 81 | No  |
| 64 | Male   | 165 | 76 | 131 | 88 | Yes |
| 52 | Male   | 167 | 80 | 131 | 78 | Yes |
| 64 | Male   | 156 | 76 | 132 | 81 | No  |

|    |        |     |    |     |    |     |
|----|--------|-----|----|-----|----|-----|
| 50 | Male   | 155 | 68 | 132 | 85 | Yes |
| 56 | Male   | 176 | 64 | 132 | 71 | No  |
| 41 | Male   | 178 | 67 | 133 | 92 | Yes |
| 66 | Female | 179 | 63 | 133 | 75 | Yes |
| 54 | Female | 145 | 59 | 133 | 89 | Yes |
| 56 | Male   | 146 | 61 | 133 | 92 | Yes |
| 71 | Female | 165 | 76 | 133 | 66 | No  |
| 59 | Male   | 155 | 72 | 134 | 77 | Yes |
| 52 | Female | 152 | 89 | 134 | 90 | Yes |
| 54 | Female | 150 | 90 | 134 | 90 | Yes |
| 51 | Female | 151 | 88 | 135 | 84 | Yes |
| 50 | Female | 145 | 68 | 135 | 88 | Yes |
| 49 | Male   | 149 | 76 | 135 | 82 | Yes |
| 74 | Male   | 145 | 59 | 142 | 66 | No  |
| 70 | Male   | 148 | 75 | 152 | 89 | Yes |
| 70 | Female | 152 | 76 | 100 | 78 | No  |
| 67 | Male   | 157 | 67 | 101 | 82 | Yes |
| 57 | Male   | 156 | 76 | 105 | 92 | Yes |
| 55 | Female | 178 | 68 | 105 | 79 | No  |
| 65 | Male   | 168 | 69 | 105 | 80 | Yes |
| 58 | Male   | 169 | 64 | 101 | 86 | No  |
| 44 | Male   | 180 | 92 | 108 | 77 | Yes |
| 62 | Male   | 172 | 90 | 104 | 71 | Yes |
| 46 | Male   | 177 | 89 | 108 | 90 | Yes |
| 60 | Female | 145 | 88 | 110 | 95 | Yes |
| 55 | Male   | 156 | 79 | 90  | 65 | No  |
| 65 | Female | 176 | 94 | 110 | 80 | Yes |
| 60 | Female | 180 | 79 | 110 | 85 | Yes |
| 51 | Female | 166 | 81 | 106 | 85 | Yes |
| 51 | Female | 174 | 82 | 110 | 75 | Yes |
| 65 | Male   | 179 | 76 | 114 | 76 | Yes |
| 60 | Female | 156 | 78 | 109 | 88 | Yes |
| 44 | Male   | 165 | 75 | 115 | 77 | No  |
| 45 | Female | 176 | 73 | 95  | 68 | Yes |
| 56 | Female | 178 | 83 | 105 | 69 | No  |
| 64 | Female | 165 | 84 | 119 | 72 | Yes |
| 55 | Female | 153 | 82 | 98  | 78 | Yes |
| 39 | Female | 153 | 76 | 104 | 84 | No  |
| 52 | Female | 155 | 79 | 117 | 78 | Yes |
| 42 | Male   | 156 | 78 | 120 | 88 | No  |
| 63 | Female | 157 | 77 | 115 | 95 | Yes |
| 35 | Female | 156 | 70 | 121 | 78 | Yes |
| 35 | Male   | 157 | 67 | 120 | 78 | Yes |
| 52 | Female | 158 | 66 | 123 | 78 | Yes |
| 67 | Male   | 159 | 63 | 123 | 89 | No  |
| 49 | Female | 161 | 58 | 123 | 88 | Yes |
| 45 | Female | 165 | 56 | 122 | 66 | Yes |

|    |        |     |    |     |    |     |
|----|--------|-----|----|-----|----|-----|
| 61 | Female | 166 | 67 | 124 | 80 | Yes |
| 70 | Male   | 176 | 58 | 120 | 80 | Yes |
| 42 | Female | 171 | 61 | 120 | 98 | Yes |
| 52 | Female | 172 | 63 | 120 | 80 | Yes |
| 78 | Female | 143 | 67 | 124 | 90 | No  |
| 63 | Female | 147 | 78 | 123 | 88 | Yes |
| 39 | Female | 149 | 79 | 124 | 67 | No  |
| 42 | Female | 156 | 92 | 124 | 98 | Yes |
| 60 | Female | 155 | 54 | 125 | 80 | Yes |
| 47 | Female | 154 | 55 | 125 | 71 | No  |
| 62 | Male   | 152 | 59 | 120 | 68 | Yes |
| 54 | Female | 151 | 61 | 125 | 95 | No  |
| 61 | Female | 153 | 61 | 126 | 95 | Yes |
| 53 | Male   | 158 | 89 | 126 | 78 | Yes |
| 58 | Male   | 166 | 89 | 121 | 74 | Yes |
| 58 | Male   | 169 | 90 | 127 | 66 | Yes |
| 50 | Male   | 180 | 60 | 120 | 84 | No  |
| 53 | Male   | 177 | 66 | 127 | 81 | Yes |
| 41 | Male   | 176 | 64 | 127 | 71 | Yes |
| 45 | Male   | 177 | 67 | 127 | 84 | Yes |
| 64 | Male   | 165 | 61 | 128 | 92 | Yes |
| 63 | Male   | 179 | 62 | 128 | 80 | Yes |
| 67 | Female | 174 | 72 | 128 | 88 | Yes |
| 74 | Male   | 167 | 62 | 128 | 92 | No  |
| 66 | Male   | 168 | 68 | 129 | 76 | Yes |
| 59 | Male   | 156 | 75 | 129 | 86 | No  |
| 45 | Male   | 168 | 72 | 130 | 69 | Yes |
| 51 | Male   | 180 | 70 | 142 | 93 | Yes |
| 50 | Male   | 174 | 67 | 130 | 90 | No  |
| 65 | Male   | 173 | 66 | 130 | 74 | Yes |
| 53 | Female | 156 | 79 | 130 | 84 | No  |
| 60 | Male   | 154 | 89 | 130 | 82 | Yes |
| 54 | Male   | 154 | 90 | 133 | 90 | Yes |
| 43 | Male   | 157 | 93 | 130 | 82 | Yes |
| 59 | Male   | 159 | 94 | 132 | 95 | Yes |
| 77 | Female | 169 | 87 | 131 | 98 | No  |
| 45 | Female | 176 | 49 | 132 | 90 | Yes |
| 42 | Male   | 168 | 58 | 131 | 98 | Yes |
| 59 | Male   | 176 | 84 | 131 | 80 | Yes |
| 70 | Female | 178 | 88 | 132 | 95 | Yes |
| 50 | Male   | 165 | 94 | 132 | 99 | Yes |
| 45 | Female | 153 | 91 | 132 | 80 | Yes |
| 62 | Male   | 153 | 68 | 133 | 80 | No  |
| 62 | Female | 155 | 88 | 133 | 83 | No  |
| 46 | Male   | 156 | 69 | 133 | 78 | No  |
| 62 | Female | 157 | 81 | 133 | 86 | Yes |
| 56 | Male   | 156 | 83 | 133 | 88 | Yes |

|    |        |     |    |     |    |     |
|----|--------|-----|----|-----|----|-----|
| 56 | Male   | 157 | 85 | 134 | 88 | No  |
| 58 | Male   | 158 | 76 | 134 | 88 | Yes |
| 77 | Female | 177 | 65 | 142 | 87 | Yes |
| 39 | Female | 178 | 67 | 142 | 82 | Yes |
| 62 | Female | 179 | 92 | 142 | 90 | Yes |
| 62 | Male   | 174 | 88 | 144 | 88 | Yes |
| 56 | Female | 167 | 82 | 144 | 66 | Yes |
| 63 | Female | 168 | 81 | 144 | 89 | Yes |
| 54 | Female | 156 | 81 | 145 | 78 | Yes |
| 59 | Male   | 159 | 84 | 145 | 88 | Yes |
| 60 | Female | 180 | 67 | 140 | 90 | Yes |
| 59 | Male   | 174 | 78 | 152 | 80 | No  |
| 69 | Male   | 173 | 77 | 147 | 98 | Yes |
| 41 | Male   | 156 | 75 | 147 | 91 | No  |
| 45 | Female | 154 | 75 | 140 | 68 | Yes |
| 55 | Male   | 154 | 67 | 152 | 90 | Yes |
| 51 | Female | 157 | 65 | 152 | 77 | No  |
| 64 | Female | 159 | 80 | 145 | 75 | Yes |
| 59 | Male   | 140 | 81 | 152 | 85 | No  |
| 35 | Female | 152 | 82 | 150 | 69 | Yes |
| 62 | Female | 155 | 69 | 90  | 75 | Yes |
| 43 | Male   | 145 | 65 | 99  | 81 | Yes |
| 59 | Male   | 146 | 62 | 95  | 80 | Yes |
| 57 | Male   | 165 | 61 | 91  | 77 | No  |
| 52 | Male   | 148 | 60 | 96  | 92 | Yes |
| 50 | Male   | 153 | 65 | 97  | 82 | Yes |
| 57 | Male   | 154 | 61 | 93  | 78 | Yes |
| 43 | Male   | 165 | 62 | 102 | 82 | Yes |
| 44 | Male   | 169 | 59 | 104 | 86 | Yes |
| 62 | Male   | 169 | 58 | 105 | 94 | Yes |
| 60 | Female | 179 | 81 | 120 | 92 | No  |
| 52 | Male   | 144 | 71 | 110 | 72 | Yes |
| 52 | Male   | 165 | 72 | 111 | 79 | No  |
| 52 | Male   | 167 | 69 | 110 | 83 | Yes |
| 41 | Male   | 156 | 56 | 103 | 88 | Yes |
| 34 | Male   | 155 | 87 | 106 | 66 | No  |
| 42 | Female | 176 | 88 | 101 | 86 | Yes |
| 51 | Female | 178 | 83 | 105 | 85 | No  |
| 42 | Female | 179 | 45 | 109 | 79 | Yes |
| 43 | Female | 145 | 56 | 111 | 72 | Yes |
| 37 | Female | 146 | 67 | 121 | 77 | Yes |
| 63 | Female | 165 | 71 | 122 | 78 | Yes |
| 44 | Female | 155 | 71 | 108 | 80 | No  |
| 47 | Male   | 152 | 75 | 110 | 87 | Yes |
| 63 | Male   | 150 | 67 | 112 | 89 | Yes |
| 38 | Male   | 151 | 87 | 148 | 90 | Yes |
| 52 | Male   | 145 | 69 | 132 | 76 | Yes |

|    |        |     |    |     |    |     |
|----|--------|-----|----|-----|----|-----|
| 65 | Female | 149 | 67 | 119 | 79 | Yes |
| 52 | Male   | 145 | 59 | 130 | 85 | Yes |
| 50 | Female | 148 | 81 | 128 | 74 | No  |
| 54 | Male   | 152 | 65 | 127 | 90 | Yes |
| 49 | Male   | 157 | 68 | 124 | 88 | No  |
| 39 | Female | 156 | 61 | 125 | 95 | Yes |
| 58 | Female | 178 | 60 | 120 | 99 | Yes |
| 61 | Female | 169 | 59 | 121 | 87 | No  |
| 62 | Female | 169 | 54 | 105 | 78 | Yes |
| 62 | Female | 180 | 51 | 109 | 92 | No  |
| 55 | Female | 176 | 55 | 112 | 65 | Yes |
| 41 | Female | 177 | 51 | 128 | 85 | Yes |
| 54 | Female | 145 | 56 | 109 | 81 | Yes |
| 43 | Female | 156 | 58 | 132 | 95 | Yes |
| 42 | Male   | 176 | 59 | 130 | 92 | No  |
| 47 | Female | 180 | 76 | 138 | 88 | Yes |
| 35 | Male   | 166 | 77 | 137 | 80 | Yes |
| 44 | Female | 174 | 65 | 139 | 66 | Yes |
| 44 | Female | 151 | 70 | 129 | 82 | Yes |
| 46 | Male   | 153 | 56 | 132 | 87 | No  |
| 70 | Male   | 158 | 56 | 131 | 81 | Yes |
| 52 | Male   | 166 | 51 | 130 | 82 | Yes |
| 70 | Male   | 169 | 65 | 138 | 95 | Yes |
| 38 | Female | 180 | 65 | 135 | 98 | Yes |
| 47 | Male   | 177 | 62 | 139 | 97 | Yes |
| 62 | Female | 176 | 69 | 139 | 90 | Yes |
| 52 | Male   | 177 | 70 | 120 | 98 | Yes |
| 59 | Male   | 178 | 71 | 121 | 91 | Yes |
| 59 | Male   | 179 | 81 | 125 | 80 | Yes |
| 59 | Female | 174 | 83 | 128 | 78 | Yes |
| 59 | Male   | 167 | 83 | 129 | 87 | Yes |
| 47 | Male   | 168 | 84 | 131 | 90 | No  |
| 41 | Male   | 156 | 84 | 127 | 95 | Yes |
| 56 | Male   | 159 | 78 | 121 | 92 | No  |
| 54 | Male   | 180 | 77 | 120 | 97 | Yes |
| 44 | Male   | 174 | 71 | 129 | 90 | No  |
| 63 | Female | 173 | 77 | 131 | 97 | No  |
| 58 | Female | 156 | 70 | 135 | 93 | Yes |
| 67 | Male   | 154 | 73 | 134 | 91 | No  |
| 43 | Male   | 154 | 69 | 145 | 95 | Yes |
| 71 | Female | 157 | 66 | 142 | 80 | Yes |
| 54 | Male   | 159 | 86 | 111 | 85 | Yes |
| 44 | Male   | 140 | 81 | 110 | 88 | Yes |
| 66 | Male   | 152 | 83 | 103 | 86 | No  |
| 60 | Female | 155 | 69 | 102 | 87 | Yes |
| 59 | Male   | 145 | 74 | 120 | 89 | Yes |
| 64 | Male   | 146 | 71 | 125 | 92 | Yes |



|    |        |     |    |     |    |     |
|----|--------|-----|----|-----|----|-----|
| 47 | Male   | 165 | 71 | 127 | 95 | Yes |
| 45 | Male   | 148 | 67 | 129 | 97 | Yes |
| 61 | Male   | 153 | 68 | 129 | 99 | Yes |
| 66 | Male   | 154 | 66 | 130 | 68 | No  |
| 58 | Male   | 165 | 67 | 131 | 77 | Yes |
| 67 | Male   | 169 | 60 | 134 | 95 | No  |
| 59 | Male   | 169 | 66 | 137 | 76 | Yes |
| 58 | Male   | 179 | 67 | 138 | 97 | Yes |
| 52 | Male   | 143 | 64 | 139 | 96 | Yes |
| 55 | Female | 165 | 72 | 142 | 97 | Yes |
| 62 | Female | 167 | 73 | 143 | 92 | No  |
| 62 | Female | 156 | 59 | 143 | 90 | Yes |
| 57 | Female | 155 | 81 | 143 | 84 | Yes |
| 58 | Male   | 176 | 82 | 144 | 85 | Yes |
| 56 | Female | 178 | 85 | 146 | 80 | Yes |
| 51 | Female | 179 | 66 | 150 | 68 | No  |
| 54 | Male   | 145 | 75 | 106 | 78 | Yes |
| 57 | Male   | 146 | 52 | 105 | 90 | Yes |
| 35 | Male   | 165 | 55 | 108 | 94 | Yes |
| 47 | Male   | 155 | 56 | 120 | 92 | Yes |
| 58 | Female | 152 | 60 | 120 | 93 | Yes |
| 56 | Male   | 150 | 60 | 121 | 91 | Yes |
| 56 | Female | 151 | 61 | 129 | 96 | No  |
| 57 | Female | 145 | 57 | 129 | 95 | Yes |
| 67 | Female | 149 | 57 | 129 | 94 | No  |
| 62 | Female | 145 | 58 | 129 | 98 | Yes |
| 42 | Male   | 148 | 70 | 130 | 99 | Yes |
| 38 | Male   | 152 | 75 | 135 | 85 | No  |
| 54 | Female | 157 | 79 | 138 | 88 | Yes |
| 41 | Male   | 156 | 83 | 105 | 94 | No  |
| 57 | Male   | 178 | 52 | 120 | 95 | Yes |
| 46 | Female | 169 | 65 | 127 | 80 | Yes |
| 54 | Male   | 169 | 67 | 125 | 80 | Yes |
| 60 | Female | 180 | 60 | 130 | 80 | Yes |
| 52 | Female | 174 | 67 | 131 | 92 | No  |
| 58 | Female | 177 | 80 | 129 | 94 | Yes |
| 45 | Male   | 145 | 81 | 139 | 95 | Yes |
| 63 | Male   | 156 | 83 | 128 | 92 | Yes |
| 57 | Female | 176 | 60 | 145 | 72 | Yes |
| 58 | Male   | 180 | 61 | 101 | 88 | Yes |
| 49 | Male   | 166 | 65 | 108 | 84 | Yes |
| 69 | Male   | 174 | 59 | 115 | 78 | No  |
| 58 | Male   | 172 | 57 | 120 | 90 | Yes |
| 54 | Male   | 173 | 59 | 128 | 74 | No  |
| 63 | Male   | 165 | 55 | 127 | 77 | Yes |
| 71 | Female | 176 | 50 | 129 | 75 | Yes |
| 67 | Male   | 178 | 53 | 130 | 85 | No  |

|    |        |     |    |     |    |           |
|----|--------|-----|----|-----|----|-----------|
| 59 | Male   | 165 | 54 | 138 | 87 | Yes       |
| 34 | Male   | 153 | 59 | 134 | 91 | No        |
| 37 | Female | 153 | 76 | 135 | 85 | Yes       |
| 63 | Male   | 155 | 71 | 134 | 94 | Yes       |
| 57 | Male   | 156 | 68 | 135 | 95 | Yes       |
| 47 | Male   | 157 | 79 | 142 | 92 | Yes       |
| 52 | Male   | 156 | 85 | 144 | 92 | No        |
| 60 | Male   | 157 | 88 | 145 | 88 | Yes       |
| 52 | Male   | 158 | 87 | 143 | 90 | Yes       |
| 66 | Female | 159 | 84 | 147 | 84 | Yes       |
| 52 | Male   | 161 | 82 | 105 | 90 | Yes       |
| 64 | Male   | 165 | 65 | 101 | 94 | Yes       |
| 44 | Male   | 166 | 68 | 109 | 88 | Yes       |
| 54 | Female | 176 | 76 | 103 | 75 | No        |
| 58 | Male   | 171 | 87 | 121 | 68 | Yes       |
| 54 | Female | 172 | 90 | 123 | 69 | No        |
| 70 | Male   | 143 | 79 | 128 | 78 | Yes       |
| 54 | Male   | 147 | 78 | 127 | 77 | Yes       |
| 49 | Male   | 149 | 79 | 125 | 71 | No        |
| 57 | Male   | 156 | 76 | 129 | 72 | Yes       |
| 49 | Female | 155 | 78 | 132 | 74 | No        |
| 42 | Female | 154 | 87 | 142 | 76 | Yes       |
| 52 | Male   | 152 | 90 | 145 | 75 | Yes       |
| 49 | Female | 151 | 83 | 102 | 95 | Yes       |
| 58 | Male   | 153 | 76 | 110 | 95 | Yes       |
| 43 | Female | 158 | 80 | 108 | 96 | No        |
| 65 | Female | 166 | 76 | 128 | 97 | Yes       |
| 46 | Female | 169 | 68 | 129 | 68 | Yes       |
| 62 | Male   | 180 | 64 | 135 | 69 | Yes       |
| 44 | Male   | 177 | 67 | 120 | 90 | Yes       |
| 55 | Female | 176 | 63 | 135 | 92 | Yes       |
| 54 | Male   | 177 | 59 | 123 | 95 | Yes       |
| 51 | Male   | 178 | 61 | 101 | 94 | No        |
| 52 | Female | 179 | 76 | 141 | 83 | Yes       |
| 47 | Male   | 174 | 72 | 146 | 91 | Yes       |
| 61 | Male   | 167 | 89 | 132 | 99 | Yes       |
| 62 | Female | 168 | 90 | 147 | 68 | Not Known |
| 52 | Male   | 156 | 88 | 148 | 86 | No        |
| 65 | Female | 159 | 68 | 118 | 78 | Yes       |
| 49 | Male   | 180 | 76 | 147 | 91 | No        |
| 58 | Male   | 174 | 59 | 120 | 93 | Yes       |
| 44 | Male   | 173 | 60 | 120 | 91 | Yes       |
| 41 | Female | 156 | 65 | 114 | 99 | Yes       |
| 64 | Female | 154 | 67 | 149 | 81 | Yes       |
| 46 | Female | 154 | 76 | 138 | 90 | No        |
| 54 | Female | 157 | 68 | 121 | 96 | Yes       |
| 46 | Female | 159 | 69 | 131 | 92 | Yes       |

|    |        |     |    |     |    |     |
|----|--------|-----|----|-----|----|-----|
| 65 | Female | 140 | 64 | 138 | 80 | Yes |
| 58 | Female | 152 | 92 | 120 | 88 | Yes |
| 57 | Female | 155 | 90 | 121 | 87 | Yes |
| 62 | Female | 145 | 89 | 110 | 85 | Yes |
| 70 | Female | 146 | 88 | 126 | 80 | No  |
| 60 | Female | 165 | 65 | 121 | 80 | Yes |
| 56 | Female | 148 | 68 | 114 | 78 | No  |
| 46 | Female | 153 | 61 | 129 | 80 | Yes |
| 68 | Male   | 154 | 60 | 130 | 78 | Yes |
| 57 | Male   | 165 | 59 | 101 | 69 | No  |
| 59 | Female | 169 | 54 | 105 | 75 | Yes |
| 62 | Male   | 169 | 51 | 142 | 95 | No  |
| 48 | Female | 169 | 55 | 152 | 66 | Yes |
| 74 | Female | 142 | 51 | 145 | 74 | Yes |
| 59 | Male   | 165 | 56 | 100 | 89 | Yes |
| 67 | Male   | 167 | 69 | 122 | 78 | Yes |
| 62 | Male   | 156 | 68 | 102 | 68 | No  |
| 46 | Male   | 155 | 76 | 101 | 99 | Yes |
| 44 | Male   | 176 | 77 | 145 | 88 | Yes |
| 52 | Male   | 178 | 65 | 109 | 77 | Yes |
| 63 | Male   | 179 | 67 | 120 | 80 | Yes |
| 57 | Female | 145 | 71 | 125 | 80 | Yes |
| 77 | Female | 146 | 72 | 142 | 80 | Yes |
| 56 | Female | 165 | 77 | 97  | 92 | No  |
| 68 | Male   | 155 | 79 | 128 | 94 | Yes |
| 61 | Male   | 152 | 75 | 120 | 95 | No  |
| 51 | Male   | 150 | 56 | 97  | 92 | Yes |
| 50 | Male   | 151 | 56 | 123 | 91 | Yes |
| 71 | Male   | 145 | 74 | 100 | 88 | No  |
| 54 | Male   | 149 | 67 | 127 | 84 | Yes |
| 61 | Male   | 145 | 61 | 109 | 78 | No  |
| 52 | Male   | 148 | 65 | 152 | 90 | Yes |
| 58 | Female | 152 | 76 | 118 | 74 | Yes |
| 59 | Male   | 157 | 49 | 142 | 77 | Yes |
| 56 | Male   | 156 | 49 | 152 | 75 | Yes |
| 51 | Male   | 178 | 55 | 145 | 85 | No  |
| 56 | Female | 169 | 51 | 128 | 87 | Yes |
| 57 | Male   | 169 | 58 | 120 | 69 | Yes |
| 45 | Male   | 180 | 58 | 118 | 78 | Yes |
| 63 | Female | 177 | 56 | 142 | 77 | Yes |
| 56 | Male   | 177 | 71 | 92  | 71 | Yes |
| 44 | Male   | 145 | 77 | 99  | 72 | Yes |
| 46 | Male   | 156 | 76 | 98  | 74 | No  |
| 43 | Male   | 176 | 69 | 95  | 76 | Yes |
| 39 | Female | 180 | 66 | 140 | 75 | No  |
| 51 | Male   | 166 | 72 | 147 | 95 | Yes |
| 67 | Male   | 174 | 73 | 99  | 95 | Yes |

|    |        |     |    |     |    |     |
|----|--------|-----|----|-----|----|-----|
| 63 | Male   | 175 | 70 | 92  | 96 | Yes |
| 51 | Male   | 174 | 72 | 91  | 97 | Yes |
| 52 | Female | 165 | 56 | 95  | 68 | No  |
| 66 | Female | 176 | 56 | 99  | 69 | No  |
| 49 | Male   | 178 | 51 | 98  | 90 | No  |
| 47 | Male   | 165 | 65 | 92  | 92 | Yes |
| 50 | Male   | 153 | 65 | 91  | 95 | No  |
| 57 | Male   | 153 | 62 | 120 | 94 | Yes |
| 59 | Male   | 155 | 69 | 123 | 93 | Yes |
| 51 | Male   | 156 | 70 | 101 | 91 | Yes |
| 61 | Female | 157 | 71 | 104 | 99 | No  |
| 66 | Male   | 156 | 81 | 115 | 68 | Yes |
| 61 | Female | 157 | 83 | 112 | 86 | No  |
| 60 | Female | 158 | 83 | 102 | 78 | Yes |
| 49 | Male   | 159 | 84 | 105 | 91 | Yes |
| 46 | Female | 161 | 75 | 108 | 93 | Yes |
| 35 | Female | 165 | 78 | 107 | 91 | Yes |
| 58 | Female | 179 | 64 | 124 | 78 | No  |
| 52 | Female | 174 | 72 | 129 | 82 | Yes |
| 58 | Female | 167 | 73 | 126 | 86 | No  |
| 41 | Male   | 168 | 59 | 110 | 94 | Yes |
| 47 | Male   | 156 | 81 | 100 | 92 | Yes |
| 61 | Female | 165 | 82 | 102 | 72 | Yes |
| 50 | Male   | 180 | 85 | 103 | 79 | Yes |
| 68 | Male   | 174 | 66 | 105 | 83 | Yes |
| 53 | Female | 173 | 78 | 108 | 88 | Yes |
| 55 | Male   | 156 | 52 | 107 | 66 | Yes |
| 48 | Male   | 154 | 55 | 106 | 86 | No  |
| 48 | Male   | 154 | 56 | 104 | 85 | Yes |
| 37 | Male   | 157 | 60 | 109 | 79 | Yes |
| 41 | Male   | 159 | 60 | 103 | 72 | Yes |
| 44 | Female | 176 | 61 | 102 | 77 | No  |
| 56 | Male   | 168 | 57 | 108 | 78 | Yes |
| 59 | Male   | 169 | 57 | 120 | 80 | No  |
| 54 | Male   | 160 | 58 | 111 | 87 | Yes |
| 51 | Male   | 167 | 70 | 102 | 89 | Yes |
| 55 | Female | 169 | 75 | 121 | 99 | Yes |
| 35 | Female | 140 | 79 | 122 | 98 | Yes |
| 89 | Male   | 152 | 83 | 135 | 95 | Yes |
| 52 | Male   | 155 | 52 | 145 | 96 | Yes |
| 58 | Male   | 145 | 65 | 152 | 92 | Yes |
| 54 | Female | 146 | 67 | 135 | 80 | No  |
| 48 | Male   | 165 | 60 | 137 | 88 | Yes |
| 57 | Male   | 148 | 67 | 138 | 87 | Yes |
| 56 | Male   | 153 | 80 | 129 | 85 | Yes |
| 41 | Female | 154 | 81 | 90  | 80 | No  |
| 51 | Male   | 165 | 83 | 99  | 80 | Yes |

|    |        |     |    |     |     |     |
|----|--------|-----|----|-----|-----|-----|
| 44 | Male   | 169 | 60 | 98  | 78  | No  |
| 58 | Female | 168 | 61 | 97  | 80  | Yes |
| 63 | Female | 169 | 65 | 90  | 78  | Yes |
| 63 | Male   | 148 | 59 | 95  | 69  | Yes |
| 70 | Female | 165 | 57 | 96  | 75  | Yes |
| 54 | Female | 167 | 59 | 99  | 95  | Yes |
| 45 | Male   | 156 | 55 | 97  | 66  | Yes |
| 48 | Male   | 177 | 87 | 139 | 97  | Yes |
| 53 | Male   | 145 | 90 | 128 | 100 | Yes |
| 58 | Male   | 156 | 83 | 145 | 92  | Yes |
| 56 | Male   | 176 | 76 | 101 | 100 | Yes |
| 68 | Male   | 179 | 80 | 108 | 95  | Yes |
| 65 | Male   | 166 | 76 | 129 | 98  | Yes |
| 67 | Male   | 174 | 68 | 129 | 100 | No  |
| 43 | Male   | 154 | 64 | 129 | 88  | Yes |
| 35 | Male   | 152 | 67 | 129 | 98  | Yes |
| 44 | Male   | 165 | 63 | 130 | 95  | Yes |
| 51 | Female | 176 | 59 | 135 | 92  | No  |
| 46 | Female | 178 | 61 | 138 | 92  | Yes |
| 69 | Male   | 165 | 76 | 105 | 80  | No  |
| 59 | Male   | 153 | 72 | 120 | 88  | Yes |
| 66 | Male   | 153 | 89 | 127 | 89  | Yes |
| 54 | Male   | 155 | 90 | 125 | 90  | Yes |
| 52 | Male   | 156 | 88 | 130 | 92  | Yes |
| 49 | Male   | 157 | 68 | 131 | 97  | Yes |
| 62 | Male   | 156 | 76 | 129 | 96  | Yes |
| 41 | Female | 157 | 59 | 139 | 87  | Yes |
| 46 | Male   | 158 | 85 | 128 | 92  | No  |
| 50 | Female | 159 | 86 | 145 | 78  | Yes |
| 58 | Male   | 161 | 67 | 101 | 84  | Yes |
| 49 | Female | 165 | 76 | 108 | 85  | Yes |
| 42 | Female | 166 | 68 | 115 | 80  | No  |
| 62 | Female | 176 | 69 | 120 | 68  | Yes |
| 62 | Female | 171 | 64 | 128 | 78  | No  |
| 58 | Male   | 172 | 92 | 127 | 90  | Yes |
| 70 | Female | 143 | 90 | 129 | 94  | Yes |
| 62 | Female | 147 | 89 | 130 | 92  | Yes |
| 58 | Female | 149 | 88 | 138 | 91  | Yes |
| 48 | Male   | 156 | 79 | 134 | 91  | Yes |
| 71 | Female | 155 | 94 | 135 | 96  | Yes |
| 52 | Male   | 154 | 79 | 134 | 95  | Yes |
| 58 | Female | 152 | 81 | 135 | 94  | No  |
| 66 | Male   | 151 | 82 | 142 | 98  | Yes |
| 55 | Female | 153 | 76 | 144 | 84  | Yes |
| 39 | Female | 158 | 78 | 145 | 84  | Yes |
| 41 | Male   | 166 | 75 | 143 | 88  | Yes |
| 66 | Female | 169 | 73 | 147 | 75  | Yes |

|    |        |     |    |     |    |           |
|----|--------|-----|----|-----|----|-----------|
| 58 | Female | 179 | 83 | 105 | 95 | No        |
| 58 | Female | 177 | 84 | 101 | 80 | Yes       |
| 62 | Female | 176 | 82 | 109 | 80 | Yes       |
| 57 | Female | 179 | 76 | 103 | 80 | Yes       |
| 46 | Female | 178 | 79 | 121 | 92 | Yes       |
| 51 | Male   | 179 | 78 | 123 | 94 | Yes       |
| 42 | Female | 174 | 89 | 128 | 95 | Yes       |
| 63 | Female | 167 | 87 | 127 | 92 | Yes       |
| 43 | Female | 168 | 67 | 125 | 91 | No        |
| 40 | Female | 156 | 66 | 129 | 88 | Yes       |
| 64 | Female | 159 | 63 | 132 | 84 | Yes       |
| 57 | Female | 180 | 58 | 142 | 78 | Yes       |
| 59 | Male   | 174 | 56 | 145 | 90 | No        |
| 52 | Female | 173 | 67 | 102 | 74 | Yes       |
| 42 | Female | 156 | 58 | 110 | 77 | No        |
| 51 | Female | 154 | 61 | 108 | 75 | Yes       |
| 55 | Male   | 154 | 63 | 128 | 85 | Yes       |
| 56 | Male   | 157 | 67 | 129 | 87 | Yes       |
| 56 | Male   | 159 | 78 | 135 | 91 | Yes       |
| 67 | Male   | 140 | 79 | 138 | 85 | Yes       |
| 51 | Female | 152 | 92 | 140 | 91 | Yes       |
| 49 | Male   | 155 | 54 | 142 | 95 | Yes       |
| 38 | Female | 145 | 55 | 148 | 92 | Yes       |
| 66 | Female | 146 | 59 | 120 | 92 | No        |
| 65 | Female | 165 | 61 | 110 | 88 | Yes       |
| 43 | Male   | 148 | 61 | 120 | 90 | No        |
| 47 | Female | 153 | 89 | 123 | 94 | Yes       |
| 39 | Female | 154 | 89 | 125 | 90 | Yes       |
| 57 | Female | 165 | 90 | 127 | 94 | Yes       |
| 59 | Male   | 169 | 60 | 128 | 88 | No        |
| 54 | Male   | 168 | 66 | 128 | 75 | Yes       |
| 58 | Male   | 169 | 64 | 129 | 68 | Yes       |
| 60 | Female | 148 | 67 | 129 | 69 | No        |
| 49 | Male   | 165 | 61 | 130 | 78 | No        |
| 34 | Female | 167 | 62 | 133 | 77 | No        |
| 71 | Female | 156 | 68 | 135 | 71 | No        |
| 56 | Male   | 155 | 62 | 137 | 72 | Yes       |
| 55 | Male   | 176 | 69 | 138 | 74 | Yes       |
| 71 | Female | 178 | 75 | 140 | 76 | Not Known |
| 50 | Male   | 179 | 72 | 142 | 75 | No        |
| 41 | Male   | 145 | 70 | 145 | 95 | Yes       |
| 62 | Female | 146 | 67 | 148 | 95 | No        |
| 58 | Female | 165 | 66 | 152 | 79 | Yes       |
| 50 | Female | 155 | 79 | 129 | 97 | No        |
| 76 | Female | 152 | 89 | 98  | 68 | Yes       |
| 44 | Male   | 150 | 90 | 99  | 69 | No        |
| 46 | Female | 151 | 93 | 127 | 90 | No        |

|    |        |     |    |     |     |     |
|----|--------|-----|----|-----|-----|-----|
| 56 | Male   | 145 | 94 | 128 | 92  | Yes |
| 58 | Male   | 149 | 87 | 130 | 95  | Yes |
| 66 | Male   | 145 | 49 | 131 | 94  | Yes |
| 71 | Female | 148 | 58 | 137 | 93  | Yes |
| 54 | Male   | 152 | 84 | 139 | 91  | Yes |
| 54 | Male   | 157 | 88 | 153 | 99  | Yes |
| 54 | Male   | 156 | 94 | 90  | 68  | Yes |
| 59 | Male   | 178 | 91 | 99  | 86  | Yes |
| 44 | Male   | 169 | 68 | 95  | 78  | No  |
| 64 | Male   | 168 | 88 | 120 | 91  | Yes |
| 55 | Male   | 179 | 69 | 123 | 93  | Yes |
| 56 | Male   | 175 | 81 | 127 | 91  | No  |
| 57 | Male   | 177 | 83 | 128 | 99  | No  |
| 67 | Male   | 145 | 85 | 129 | 98  | Yes |
| 44 | Male   | 156 | 76 | 131 | 95  | No  |
| 63 | Male   | 176 | 71 | 132 | 96  | Yes |
| 45 | Male   | 179 | 72 | 132 | 92  | No  |
| 37 | Male   | 166 | 77 | 133 | 80  | No  |
| 45 | Female | 174 | 66 | 137 | 88  | Yes |
| 60 | Male   | 150 | 54 | 142 | 87  | Yes |
| 58 | Female | 152 | 58 | 152 | 81  | Yes |
| 64 | Male   | 165 | 56 | 100 | 80  | Yes |
| 68 | Male   | 176 | 67 | 101 | 80  | No  |
| 41 | Male   | 178 | 65 | 105 | 78  | No  |
| 62 | Female | 165 | 68 | 105 | 80  | Yes |
| 62 | Male   | 153 | 69 | 105 | 78  | Yes |
| 54 | Male   | 153 | 73 | 101 | 69  | Yes |
| 70 | Male   | 155 | 77 | 108 | 75  | Yes |
| 55 | Female | 156 | 79 | 104 | 95  | Yes |
| 58 | Female | 157 | 61 | 108 | 66  | No  |
| 62 | Male   | 156 | 55 | 110 | 74  | Yes |
| 57 | Female | 157 | 54 | 90  | 89  | No  |
| 39 | Female | 158 | 50 | 110 | 78  | No  |
| 64 | Male   | 159 | 51 | 110 | 68  | Yes |
| 50 | Male   | 161 | 55 | 106 | 99  | No  |
| 60 | Female | 165 | 52 | 110 | 88  | Yes |
| 76 | Female | 166 | 51 | 114 | 77  | Yes |
| 60 | Female | 176 | 65 | 109 | 80  | Yes |
| 45 | Female | 171 | 67 | 115 | 94  | Yes |
| 43 | Female | 168 | 65 | 124 | 88  | No  |
| 59 | Male   | 156 | 61 | 125 | 98  | No  |
| 59 | Female | 159 | 62 | 125 | 102 | Yes |
| 58 | Male   | 180 | 59 | 120 | 98  | No  |
| 66 | Female | 174 | 58 | 125 | 89  | No  |
| 48 | Female | 173 | 81 | 126 | 98  | No  |
| 56 | Male   | 156 | 71 | 126 | 98  | Yes |
| 44 | Male   | 154 | 72 | 121 | 85  | No  |

|    |        |     |    |     |     |     |
|----|--------|-----|----|-----|-----|-----|
| 45 | Female | 154 | 70 | 127 | 103 | No  |
| 59 | Male   | 157 | 72 | 120 | 95  | Yes |
| 55 | Female | 159 | 87 | 127 | 101 | No  |
| 57 | Male   | 140 | 88 | 127 | 92  | No  |
| 54 | Male   | 152 | 83 | 127 | 94  | Yes |
| 46 | Female | 155 | 45 | 128 | 99  | Yes |
| 59 | Male   | 145 | 56 | 128 | 98  | Yes |
| 54 | Male   | 146 | 67 | 128 | 91  | No  |
| 46 | Female | 165 | 71 | 128 | 100 | No  |
| 69 | Male   | 148 | 71 | 129 | 95  | Yes |
| 43 | Male   | 153 | 75 | 129 | 97  | No  |
| 51 | Female | 154 | 67 | 130 | 91  | No  |
| 57 | Male   | 165 | 87 | 142 | 95  | No  |
| 63 | Female | 173 | 69 | 130 | 96  | Yes |
| 60 | Male   | 168 | 67 | 130 | 97  | Yes |
| 45 | Male   | 169 | 59 | 130 | 100 | No  |
| 51 | Male   | 142 | 81 | 130 | 96  | Yes |
| 35 | Male   | 165 | 65 | 133 | 95  | Yes |
| 54 | Female | 167 | 68 | 130 | 95  | No  |
| 42 | Female | 156 | 61 | 132 | 97  | Yes |
| 68 | Male   | 155 | 60 | 131 | 98  | No  |
| 60 | Male   | 176 | 59 | 132 | 95  | Yes |
| 59 | Male   | 178 | 54 | 131 | 99  | No  |
| 42 | Female | 179 | 51 | 131 | 105 | Yes |
| 59 | Female | 145 | 55 | 132 | 102 | Yes |
| 53 | Female | 146 | 51 | 132 | 95  | Yes |
| 51 | Female | 165 | 56 | 132 | 105 | No  |
| 44 | Male   | 155 | 74 | 133 | 105 | No  |
| 56 | Female | 152 | 75 | 133 | 106 | Yes |
| 48 | Male   | 150 | 76 | 133 | 95  | No  |
| 57 | Male   | 151 | 77 | 133 | 95  | Yes |
| 60 | Female | 145 | 65 | 133 | 105 | No  |
| 48 | Male   | 149 | 67 | 134 | 99  | No  |
| 43 | Male   | 145 | 71 | 134 | 99  | No  |
| 54 | Male   | 148 | 72 | 134 | 102 | Yes |
| 44 | Male   | 152 | 77 | 135 | 104 | Yes |
| 48 | Male   | 157 | 79 | 135 | 92  | Yes |
| 71 | Male   | 156 | 75 | 135 | 96  | No  |
| 63 | Male   | 178 | 56 | 136 | 105 | Yes |
| 35 | Male   | 173 | 56 | 136 | 92  | Yes |
| 37 | Male   | 168 | 74 | 137 | 108 | No  |
| 57 | Male   | 179 | 67 | 137 | 106 | No  |
| 46 | Male   | 178 | 61 | 137 | 105 | Yes |
| 59 | Male   | 177 | 65 | 137 | 105 | No  |
| 64 | Male   | 145 | 76 | 137 | 97  | Yes |
| 52 | Male   | 156 | 49 | 137 | 89  | No  |
| 41 | Female | 176 | 49 | 137 | 94  | No  |



|    |        |     |    |     |     |           |
|----|--------|-----|----|-----|-----|-----------|
| 49 | Female | 179 | 55 | 138 | 108 | No        |
| 66 | Male   | 166 | 51 | 138 | 109 | Yes       |
| 62 | Female | 174 | 58 | 138 | 91  | Yes       |
| 43 | Male   | 151 | 58 | 138 | 96  | Yes       |
| 35 | Male   | 155 | 56 | 139 | 90  | No        |
| 41 | Male   | 165 | 71 | 140 | 91  | No        |
| 45 | Male   | 176 | 77 | 140 | 95  | Yes       |
| 40 | Female | 178 | 76 | 144 | 86  | No        |
| 56 | Male   | 165 | 69 | 140 | 98  | Yes       |
| 71 | Female | 153 | 66 | 142 | 83  | Yes       |
| 51 | Female | 153 | 72 | 142 | 81  | Yes       |
| 67 | Female | 155 | 73 | 142 | 87  | Yes       |
| 41 | Female | 156 | 77 | 144 | 84  | Yes       |
| 41 | Male   | 157 | 78 | 144 | 91  | Yes       |
| 53 | Male   | 156 | 56 | 144 | 90  | Yes       |
| 48 | Male   | 157 | 56 | 145 | 94  | Yes       |
| 61 | Male   | 158 | 51 | 145 | 95  | Yes       |
| 39 | Male   | 159 | 65 | 140 | 92  | Yes       |
| 58 | Male   | 161 | 65 | 152 | 93  | Yes       |
| 67 | Female | 165 | 62 | 147 | 77  | Not Known |
| 59 | Female | 166 | 69 | 147 | 72  | Yes       |
| 55 | Male   | 176 | 70 | 140 | 98  | No        |
| 70 | Male   | 171 | 71 | 152 | 97  | No        |
| 50 | Male   | 172 | 81 | 124 | 93  | No        |
| 63 | Female | 143 | 83 | 145 | 88  | No        |
| 58 | Male   | 147 | 83 | 125 | 94  | No        |
| 77 | Male   | 149 | 84 | 135 | 95  | Yes       |
| 53 | Male   | 156 | 84 | 90  | 92  | Yes       |
| 44 | Male   | 155 | 78 | 99  | 96  | No        |
| 65 | Male   | 154 | 77 | 95  | 96  | No        |
| 58 | Female | 152 | 71 | 91  | 96  | Yes       |
| 39 | Female | 151 | 77 | 96  | 80  | Yes       |
| 66 | Female | 153 | 70 | 97  | 80  | Yes       |
| 44 | Male   | 158 | 73 | 93  | 92  | Yes       |
| 40 | Female | 166 | 69 | 102 | 91  | Yes       |
| 64 | Female | 173 | 66 | 104 | 90  | Yes       |
| 64 | Female | 179 | 86 | 105 | 93  | Yes       |
| 65 | Female | 177 | 81 | 120 | 94  | No        |
| 51 | Female | 176 | 83 | 110 | 95  | No        |
| 62 | Male   | 179 | 69 | 111 | 96  | Yes       |
| 70 | Male   | 178 | 79 | 110 | 92  | Yes       |
| 59 | Female | 179 | 71 | 103 | 92  | Yes       |
| 61 | Female | 174 | 71 | 106 | 80  | Yes       |
| 55 | Male   | 167 | 67 | 101 | 88  | Yes       |
| 67 | Male   | 168 | 68 | 105 | 89  | Yes       |
| 58 | Male   | 156 | 66 | 109 | 90  | No        |
| 42 | Female | 159 | 67 | 111 | 92  | No        |

|    |        |     |    |     |    |           |
|----|--------|-----|----|-----|----|-----------|
| 51 | Female | 180 | 60 | 121 | 97 | Yes       |
| 56 | Male   | 174 | 66 | 122 | 96 | Yes       |
| 35 | Male   | 173 | 67 | 108 | 97 | Yes       |
| 67 | Male   | 156 | 64 | 110 | 92 | Yes       |
| 66 | Male   | 154 | 72 | 112 | 96 | Yes       |
| 51 | Male   | 154 | 73 | 148 | 84 | Yes       |
| 45 | Male   | 157 | 59 | 132 | 85 | No        |
| 57 | Male   | 159 | 81 | 119 | 80 | No        |
| 57 | Male   | 140 | 82 | 130 | 68 | Yes       |
| 65 | Female | 152 | 85 | 128 | 78 | Yes       |
| 54 | Female | 155 | 66 | 127 | 90 | Yes       |
| 71 | Female | 145 | 80 | 124 | 94 | Yes       |
| 54 | Male   | 146 | 51 | 125 | 92 | Yes       |
| 57 | Male   | 165 | 55 | 120 | 93 | Yes       |
| 50 | Female | 148 | 52 | 121 | 91 | No        |
| 57 | Female | 153 | 51 | 105 | 96 | No        |
| 51 | Female | 154 | 65 | 109 | 95 | Yes       |
| 67 | Female | 165 | 67 | 112 | 94 | Yes       |
| 57 | Male   | 173 | 92 | 128 | 98 | Yes       |
| 66 | Male   | 168 | 88 | 109 | 78 | Yes       |
| 51 | Female | 169 | 82 | 132 | 85 | Yes       |
| 67 | Male   | 149 | 81 | 130 | 88 | Yes       |
| 60 | Female | 165 | 81 | 138 | 94 | No        |
| 58 | Male   | 167 | 84 | 137 | 95 | No        |
| 43 | Female | 156 | 67 | 139 | 80 | Yes       |
| 46 | Male   | 155 | 78 | 138 | 80 | Yes       |
| 63 | Male   | 176 | 77 | 145 | 80 | Yes       |
| 59 | Male   | 178 | 75 | 152 | 92 | Yes       |
| 41 | Male   | 179 | 75 | 106 | 94 | Yes       |
| 54 | Male   | 145 | 67 | 111 | 95 | Yes       |
| 60 | Male   | 146 | 65 | 125 | 92 | No        |
| 57 | Male   | 165 | 80 | 128 | 91 | No        |
| 44 | Male   | 155 | 81 | 129 | 88 | Yes       |
| 40 | Male   | 152 | 82 | 132 | 84 | Yes       |
| 69 | Female | 153 | 71 | 121 | 75 | Not Known |
| 69 | Female | 176 | 80 | 125 | 95 | Yes       |
| 69 | Male   | 156 | 61 | 128 | 95 | Yes       |
| 69 | Male   | 156 | 61 | 129 | 96 | Not Known |
| 69 | Male   | 167 | 84 | 131 | 97 | No        |
| 69 | Male   | 150 | 96 | 127 | 68 | Not Known |
| 69 | Male   | 170 | 69 | 121 | 69 | Yes       |
| 69 | Female | 171 | 73 | 120 | 90 | Yes       |
| 69 | Male   | 165 | 83 | 129 | 92 | Not Known |
| 69 | Female | 170 | 83 | 131 | 95 | Not Known |
| 70 | Male   | 149 | 90 | 135 | 94 | Not Known |
| 70 | Male   | 165 | 57 | 134 | 93 | Not Known |
| 70 | Male   | 165 | 56 | 145 | 91 | Not Known |

|    |        |     |     |     |    |           |
|----|--------|-----|-----|-----|----|-----------|
| 70 | Male   | 162 | 87  | 142 | 87 | No        |
| 70 | Female | 154 | 70  | 111 | 68 | No        |
| 70 | Female | 153 | 73  | 110 | 86 | Yes       |
| 70 | Female | 173 | 106 | 103 | 78 | No        |
| 70 | Female | 173 | 106 | 102 | 91 | Yes       |
| 70 | Female | 178 | 81  | 120 | 93 | No        |
| 70 | Female | 178 | 80  | 125 | 91 | Not Known |
| 70 | Male   | 171 | 101 | 127 | 79 | Not Known |
| 70 | Female | 165 | 62  | 129 | 84 | Not Known |
| 70 | Female | 171 | 83  | 129 | 95 | No        |
| 71 | Female | 174 | 75  | 130 | 96 | Yes       |
| 71 | Female | 180 | 86  | 131 | 92 | Not Known |
| 71 | Female | 177 | 92  | 134 | 80 | No        |
| 71 | Female | 165 | 65  | 137 | 88 | Not Known |
| 71 | Female | 174 | 91  | 138 | 87 | Yes       |
| 71 | Female | 168 | 94  | 139 | 85 | Not Known |
| 71 | Female | 175 | 60  | 142 | 80 | Not Known |
| 71 | Male   | 155 | 89  | 143 | 82 | Yes       |
| 71 | Female | 178 | 81  | 143 | 90 | No        |
| 71 | Female | 168 | 104 | 143 | 83 | No        |
| 72 | Male   | 154 | 59  | 144 | 85 | Not Known |
| 72 | Male   | 163 | 78  | 146 | 94 | Not Known |
| 72 | Male   | 165 | 80  | 150 | 95 | Not Known |
| 72 | Male   | 160 | 87  | 106 | 92 | Not Known |
| 72 | Male   | 163 | 62  | 105 | 96 | No        |
| 72 | Male   | 165 | 75  | 108 | 96 | Yes       |
| 72 | Female | 181 | 94  | 120 | 96 | Not Known |
| 72 | Female | 168 | 67  | 120 | 80 | Not Known |
| 72 | Female | 181 | 78  | 121 | 80 | Yes       |
| 72 | Female | 170 | 70  | 129 | 78 | No        |
| 72 | Female | 171 | 72  | 129 | 95 | Not Known |
| 72 | Female | 173 | 96  | 129 | 92 | Not Known |
| 73 | Female | 172 | 75  | 129 | 91 | Not Known |
| 73 | Male   | 143 | 67  | 130 | 90 | Not Known |
| 73 | Male   | 165 | 71  | 135 | 93 | Not Known |
| 73 | Male   | 165 | 67  | 138 | 94 | Yes       |
| 73 | Male   | 155 | 69  | 105 | 95 | Not Known |
| 73 | Female | 170 | 75  | 120 | 96 | Not Known |
| 73 | Female | 177 | 80  | 127 | 92 | Not Known |
| 73 | Female | 170 | 79  | 125 | 92 | Not Known |
| 73 | Male   | 164 | 97  | 130 | 80 | No        |
| 73 | Male   | 160 | 106 | 131 | 88 | Not Known |
| 73 | Female | 175 | 80  | 129 | 89 | Not Known |
| 74 | Female | 162 | 67  | 139 | 90 | Not Known |
| 74 | Male   | 147 | 64  | 128 | 92 | Not Known |
| 74 | Male   | 155 | 69  | 145 | 97 | Not Known |
| 74 | Male   | 165 | 70  | 101 | 96 | Not Known |

|    |        |     |     |     |    |           |
|----|--------|-----|-----|-----|----|-----------|
| 74 | Female | 163 | 65  | 108 | 97 | Yes       |
| 74 | Male   | 163 | 80  | 115 | 92 | Not Known |
| 74 | Male   | 151 | 69  | 120 | 96 | Not Known |
| 74 | Male   | 157 | 86  | 128 | 84 | Not Known |
| 74 | Female | 173 | 81  | 127 | 85 | No        |
| 74 | Female | 166 | 90  | 129 | 80 | Not Known |
| 74 | Male   | 148 | 103 | 130 | 68 | Not Known |
| 74 | Female | 167 | 78  | 138 | 78 | No        |
| 74 | Male   | 167 | 101 | 134 | 90 | Not Known |
| 74 | Female | 179 | 90  | 135 | 94 | Not Known |
| 74 | Female | 178 | 105 | 134 | 92 | Yes       |
| 75 | Female | 180 | 69  | 135 | 93 | No        |
| 75 | Male   | 147 | 57  | 142 | 91 | Not Known |
| 75 | Female | 176 | 80  | 144 | 72 | Not Known |
| 75 | Female | 178 | 77  | 145 | 82 | Not Known |
| 75 | Male   | 167 | 66  | 143 | 94 | No        |
| 75 | Male   | 156 | 60  | 147 | 86 | Not Known |
| 75 | Female | 181 | 96  | 105 | 81 | Yes       |
| 75 | Male   | 162 | 57  | 101 | 85 | Not Known |
| 75 | Male   | 165 | 91  | 109 | 88 | No        |
| 75 | Male   | 171 | 97  | 103 | 94 | Not Known |
| 75 | Female | 167 | 73  | 121 | 95 | Yes       |
| 75 | Female | 173 | 76  | 123 | 80 | Yes       |
| 75 | Male   | 158 | 84  | 128 | 80 | Not Known |
| 75 | Female | 175 | 93  | 127 | 80 | Not Known |
| 75 | Female | 173 | 97  | 125 | 92 | Not Known |
| 75 | Female | 178 | 66  | 129 | 94 | Not Known |
| 77 | Male   | 160 | 84  | 129 | 69 | Yes       |
| 77 | Female | 177 | 102 | 130 | 78 | Yes       |
| 77 | Male   | 158 | 82  | 133 | 88 | No        |
| 77 | Female | 172 | 84  | 135 | 80 | No        |
| 77 | Female | 176 | 109 | 137 | 83 | Not Known |
| 77 | Female | 177 | 95  | 138 | 85 | Not Known |
| 77 | Female | 176 | 93  | 140 | 86 | Not Known |
| 78 | Female | 177 | 79  | 142 | 84 | No        |
| 78 | Female | 180 | 77  | 145 | 90 | Not Known |
| 78 | Female | 178 | 76  | 148 | 82 | Not Known |
| 78 | Female | 152 | 59  | 152 | 97 | Yes       |
| 78 | Female | 173 | 101 | 145 | 86 | Not Known |
| 79 | Female | 160 | 64  | 133 | 92 | Not Known |
| 79 | Female | 175 | 98  | 137 | 91 | Not Known |
| 79 | Male   | 163 | 84  | 142 | 88 | No        |
| 79 | Female | 181 | 85  | 152 | 84 | NO        |
| 79 | Female | 178 | 81  | 100 | 78 | No        |
| 79 | Male   | 164 | 85  | 101 | 90 | No        |
| 80 | Female | 180 | 80  | 105 | 74 | No        |
| 80 | Female | 163 | 72  | 105 | 77 | No        |

|    |        |     |     |     |    |           |
|----|--------|-----|-----|-----|----|-----------|
| 80 | Female | 158 | 57  | 105 | 75 | Not Known |
| 80 | Male   | 162 | 80  | 101 | 85 | Yes       |
| 80 | Male   | 168 | 55  | 108 | 87 | Not Known |
| 80 | Male   | 161 | 66  | 104 | 91 | Not Known |
| 80 | Male   | 163 | 63  | 108 | 85 | No        |
| 80 | Male   | 172 | 67  | 110 | 94 | No        |
| 80 | Female | 177 | 78  | 90  | 95 | No        |
| 80 | Female | 175 | 102 | 110 | 92 | No        |
| 81 | Female | 164 | 60  | 110 | 92 | No        |
| 81 | Female | 180 | 94  | 106 | 88 | Not Known |
| 81 | Female | 178 | 78  | 110 | 90 | Not Known |
| 81 | Male   | 157 | 52  | 114 | 94 | No        |
| 81 | Male   | 162 | 67  | 109 | 90 | Yes       |
| 81 | Female | 168 | 89  | 115 | 94 | Not Known |
| 81 | Female | 152 | 72  | 95  | 88 | Not Known |
| 81 | Female | 180 | 74  | 105 | 75 | Yes       |
| 81 | Female | 175 | 84  | 119 | 68 | Yes       |
| 81 | Female | 179 | 77  | 98  | 69 | Not Known |
| 81 | Female | 173 | 97  | 104 | 78 | Not Known |
| 81 | Female | 174 | 79  | 117 | 77 | No        |
| 81 | Female | 177 | 102 | 120 | 71 | No        |
| 81 | Male   | 163 | 75  | 115 | 72 | Not Known |
| 81 | Female | 164 | 68  | 121 | 74 | Not Known |
| 81 | Female | 170 | 79  | 120 | 76 | Yes       |
| 81 | Female | 173 | 83  | 123 | 75 | Yes       |
| 81 | Female | 177 | 76  | 123 | 95 | Not Known |
| 81 | Female | 172 | 78  | 123 | 95 | No        |
| 81 | Female | 174 | 91  | 122 | 96 | Not Known |
| 81 | Female | 163 | 83  | 124 | 97 | No        |
| 82 | Female | 168 | 95  | 120 | 68 | No        |
| 82 | Female | 175 | 85  | 120 | 69 | Not Known |
| 82 | Female | 169 | 80  | 120 | 90 | Not Known |
| 82 | Male   | 160 | 79  | 124 | 92 | Not Known |
| 82 | Male   | 155 | 63  | 123 | 95 | Yes       |
| 82 | Male   | 149 | 64  | 124 | 94 | Not Known |
| 82 | Female | 180 | 77  | 124 | 93 | No        |
| 82 | Male   | 168 | 64  | 125 | 91 | Not Known |
| 82 | Male   | 163 | 61  | 125 | 99 | No        |
| 83 | Male   | 155 | 66  | 120 | 68 | No        |
| 83 | Female | 169 | 78  | 125 | 86 | Not Known |
| 83 | Female | 170 | 88  | 126 | 78 | Yes       |
| 83 | Male   | 158 | 64  | 126 | 91 | No        |
| 83 | Male   | 162 | 68  | 121 | 93 | Not Known |
| 83 | Male   | 142 | 62  | 127 | 91 | Not Known |
| 83 | Male   | 158 | 72  | 120 | 99 | Yes       |
| 83 | Female | 170 | 73  | 127 | 98 | Not Known |
| 83 | Male   | 160 | 62  | 127 | 95 | Not Known |

|    |        |     |    |     |     |           |
|----|--------|-----|----|-----|-----|-----------|
| 83 | Male   | 163 | 81 | 127 | 96  | No        |
| 83 | Female | 173 | 84 | 128 | 92  | Not Known |
| 83 | Female | 151 | 59 | 128 | 80  | Yes       |
| 83 | Female | 168 | 80 | 128 | 88  | Not Known |
| 83 | Female | 175 | 84 | 128 | 87  | Yes       |
| 83 | Female | 172 | 81 | 129 | 85  | Not Known |
| 91 | Female | 175 | 78 | 129 | 80  | Yes       |
| 85 | Female | 172 | 89 | 130 | 80  | Not Known |
| 91 | Female | 173 | 87 | 142 | 78  | Not Known |
| 89 | Female | 175 | 95 | 130 | 80  | Yes       |
| 87 | Female | 165 | 87 | 130 | 78  | No        |
| 84 | Female | 180 | 77 | 130 | 69  | Not Known |
| 87 | Male   | 154 | 46 | 130 | 75  | Not Known |
| 91 | Female | 152 | 65 | 133 | 95  | Not Known |
| 84 | Female | 166 | 86 | 130 | 66  | Yes       |
| 87 | Female | 171 | 74 | 132 | 74  | Not Known |
| 92 | Female | 169 | 72 | 131 | 89  | Not Known |
| 97 | Female | 160 | 60 | 132 | 78  | Yes       |
| 84 | Female | 173 | 71 | 131 | 68  | No        |
| 91 | Male   | 161 | 83 | 131 | 99  | No        |
| 85 | Female | 175 | 68 | 132 | 88  | Yes       |
| 87 | Male   | 160 | 55 | 132 | 77  | Yes       |
| 91 | Male   | 162 | 73 | 132 | 80  | Not Known |
| 87 | Female | 172 | 77 | 133 | 94  | Not Known |
| 92 | Female | 172 | 89 | 133 | 90  | Yes       |
| 86 | Male   | 161 | 59 | 133 | 78  | No        |
| 87 | Male   | 158 | 58 | 133 | 80  | No        |
| 92 | Female | 178 | 87 | 133 | 90  | Yes       |
| 84 | Male   | 167 | 79 | 134 | 67  | Yes       |
| 87 | Female | 171 | 72 | 134 | 80  | Not Known |
| 87 | Male   | 166 | 69 | 134 | 92  | Not Known |
| 85 | Male   | 163 | 67 | 135 | 95  | No        |
| 87 | Male   | 157 | 74 | 135 | 99  | Yes       |
| 85 | Male   | 156 | 55 | 135 | 92  | Yes       |
| 89 | Male   | 165 | 75 | 136 | 85  | Not Known |
| 87 | Male   | 160 | 70 | 136 | 87  | Not Known |
| 88 | Male   | 162 | 61 | 137 | 88  | Not Known |
| 88 | Male   | 162 | 61 | 137 | 85  | Yes       |
| 85 | Female | 173 | 67 | 137 | 95  | Yes       |
| 94 | Female | 170 | 88 | 137 | 95  | Yes       |
| 84 | Male   | 155 | 68 | 137 | 92  | Not Known |
| 86 | Male   | 163 | 68 | 137 | 94  | Yes       |
| 86 | Male   | 163 | 67 | 137 | 91  | Not Known |
| 85 | Female | 165 | 68 | 138 | 98  | Not Known |
| 90 | Male   | 158 | 84 | 138 | 104 | Yes       |
| 89 | Male   | 160 | 64 | 138 | 88  | Not Known |
| 95 | Male   | 168 | 59 | 138 | 98  | Yes       |

|    |        |     |     |     |     |           |
|----|--------|-----|-----|-----|-----|-----------|
| 95 | Female | 173 | 69  | 139 | 86  | Yes       |
| 93 | Male   | 165 | 68  | 140 | 98  | Not Known |
| 88 | Female | 164 | 89  | 140 | 89  | Not Known |
| 91 | Male   | 150 | 54  | 144 | 98  | Not Known |
| 94 | Female | 165 | 77  | 140 | 84  | Not Known |
| 91 | Female | 160 | 76  | 142 | 85  | Not Known |
| 90 | Male   | 165 | 65  | 142 | 103 | Not Known |
| 92 | Female | 178 | 62  | 142 | 85  | Not Known |
| 96 | Female | 160 | 73  | 144 | 77  | Yes       |
| 86 | Female | 158 | 67  | 144 | 101 | Not Known |
| 84 | Female | 172 | 75  | 144 | 71  | Not Known |
| 92 | Female | 173 | 76  | 145 | 79  | Not Known |
| 91 | Female | 170 | 65  | 145 | 77  | Yes       |
| 90 | Male   | 169 | 78  | 140 | 103 | Not Known |
| 95 | Female | 169 | 77  | 152 | 90  | Not Known |
| 88 | Male   | 160 | 65  | 147 | 95  | Not Known |
| 86 | Female | 168 | 83  | 147 | 79  | Not Known |
| 87 | Female | 163 | 70  | 140 | 90  | Not Known |
| 98 | Male   | 162 | 78  | 152 | 109 | Not Known |
| 85 | Female | 169 | 77  | 140 | 96  | Not Known |
| 88 | Male   | 148 | 66  | 145 | 97  | Yes       |
| 92 | Female | 170 | 76  | 141 | 85  | Not Known |
| 84 | Male   | 164 | 79  | 147 | 96  | Yes       |
| 85 | Male   | 162 | 85  | 95  | 95  | Not Known |
| 84 | Female | 180 | 88  | 98  | 95  | Not Known |
| 85 | Male   | 162 | 72  | 108 | 97  | No        |
| 86 | Male   | 160 | 70  | 110 | 98  | Not Known |
| 84 | Male   | 160 | 59  | 112 | 95  | No        |
| 94 | Male   | 155 | 85  | 148 | 99  | Not Known |
| 90 | Male   | 145 | 51  | 132 | 105 | Yes       |
| 97 | Male   | 155 | 51  | 119 | 102 | Not Known |
| 85 | Female | 175 | 110 | 132 | 95  | Not Known |
| 91 | Female | 178 | 83  | 132 | 105 | Not Known |
| 90 | Male   | 151 | 100 | 133 | 105 | No        |
| 90 | Male   | 170 | 61  | 133 | 106 | Not Known |
| 88 | Male   | 165 | 62  | 133 | 95  | Yes       |
| 89 | Male   | 165 | 75  | 133 | 95  | Not Known |
| 92 | Female | 172 | 76  | 133 | 105 | No        |
| 86 | Male   | 155 | 62  | 134 | 105 | Not Known |
| 89 | Male   | 159 | 54  | 134 | 99  | Yes       |
| 89 | Male   | 160 | 61  | 134 | 102 | Not Known |
| 92 | Female | 167 | 77  | 135 | 104 | Yes       |
| 86 | Female | 171 | 57  | 135 | 103 | Yes       |
| 88 | Female | 179 | 95  | 135 | 96  | Not Known |
| 89 | Female | 158 | 64  | 136 | 91  | Not Known |
| 88 | Female | 158 | 67  | 136 | 92  | No        |
| 90 | Female | 162 | 54  | 137 | 92  | Not Known |

|    |        |     |     |     |     |           |
|----|--------|-----|-----|-----|-----|-----------|
| 89 | Female | 168 | 73  | 137 | 93  | No        |
| 92 | Female | 170 | 73  | 137 | 97  | Yes       |
| 94 | Female | 157 | 68  | 137 | 99  | No        |
| 93 | Female | 173 | 82  | 137 | 97  | Not Known |
| 87 | Female | 166 | 74  | 140 | 84  | Not Known |
| 87 | Female | 161 | 84  | 152 | 68  | Yes       |
| 87 | Female | 173 | 77  | 134 | 106 | Not Known |
| 90 | Female | 164 | 58  | 145 | 78  | Yes       |
| 84 | Female | 161 | 76  | 138 | 88  | Yes       |
| 88 | Male   | 168 | 101 | 131 | 105 | Not Known |
| 22 | Male   | 152 | 56  | 91  | 67  | No        |
| 22 | Female | 172 | 65  | 97  | 62  | No        |
| 52 | Female | 153 | 88  | 108 | 98  | Yes       |
| 65 | Female | 158 | 94  | 110 | 76  | Yes       |
| 65 | Female | 175 | 91  | 112 | 80  | Yes       |
| 61 | Female | 173 | 68  | 148 | 88  | Yes       |
| 64 | Male   | 179 | 88  | 132 | 87  | Yes       |
| 51 | Female | 177 | 69  | 119 | 86  | No        |
| 67 | Female | 176 | 81  | 130 | 83  | Yes       |
| 60 | Male   | 179 | 83  | 128 | 81  | Yes       |
| 66 | Male   | 178 | 85  | 127 | 89  | Yes       |
| 56 | Female | 179 | 76  | 124 | 88  | No        |
| 52 | Male   | 174 | 71  | 125 | 87  | Yes       |
| 49 | Female | 167 | 72  | 120 | 85  | Yes       |
| 60 | Male   | 168 | 77  | 121 | 90  | No        |
| 61 | Female | 156 | 66  | 105 | 71  | Yes       |
| 54 | Female | 159 | 54  | 109 | 70  | No        |
| 53 | Female | 180 | 58  | 112 | 95  | Yes       |
| 42 | Male   | 174 | 56  | 128 | 90  | Yes       |
| 67 | Female | 173 | 67  | 109 | 92  | Yes       |
| 58 | Male   | 156 | 65  | 132 | 88  | No        |
| 57 | Female | 154 | 68  | 130 | 87  | Yes       |
| 54 | Female | 154 | 69  | 138 | 78  | Yes       |
| 67 | Male   | 157 | 73  | 137 | 77  | Yes       |
| 46 | Male   | 159 | 77  | 139 | 75  | Yes       |
| 64 | Male   | 140 | 79  | 138 | 69  | Yes       |
| 60 | Female | 152 | 61  | 145 | 84  | Yes       |
| 58 | Male   | 155 | 55  | 152 | 81  | Yes       |
| 62 | Female | 145 | 54  | 106 | 85  | Yes       |
| 57 | Male   | 146 | 50  | 111 | 87  | No        |
| 61 | Male   | 165 | 51  | 125 | 98  | Yes       |
| 65 | Male   | 148 | 55  | 128 | 90  | Yes       |
| 56 | Male   | 153 | 52  | 129 | 89  | Yes       |
| 50 | Male   | 154 | 51  | 132 | 78  | No        |
| 56 | Male   | 165 | 65  | 135 | 90  | Yes       |
| 71 | Female | 173 | 67  | 138 | 86  | Yes       |
| 38 | Male   | 168 | 92  | 142 | 96  | No        |



|    |        |     |    |     |     |           |
|----|--------|-----|----|-----|-----|-----------|
| 40 | Male   | 169 | 88 | 141 | 100 | Not Known |
| 64 | Male   | 140 | 82 | 121 | 81  | No        |
| 57 | Female | 165 | 81 | 128 | 86  | Yes       |
| 47 | Female | 167 | 81 | 127 | 83  | Yes       |
| 44 | Male   | 156 | 84 | 129 | 92  | Yes       |
| 44 | Female | 155 | 67 | 132 | 91  | No        |
| 59 | Male   | 176 | 78 | 142 | 90  | Yes       |
| 51 | Female | 178 | 77 | 144 | 79  | Yes       |
| 54 | Female | 179 | 75 | 145 | 87  | Yes       |
| 51 | Female | 145 | 75 | 139 | 85  | Yes       |
| 42 | Male   | 146 | 67 | 137 | 91  | Yes       |
| 51 | Female | 165 | 65 | 131 | 90  | Yes       |
| 55 | Male   | 155 | 80 | 151 | 85  | Yes       |
| 60 | Female | 152 | 81 | 121 | 76  | Yes       |
| 67 | Female | 150 | 82 | 127 | 74  | No        |
| 45 | Female | 151 | 69 | 125 | 75  | Yes       |
| 53 | Male   | 145 | 65 | 129 | 78  | Yes       |
| 62 | Female | 149 | 62 | 132 | 85  | Yes       |
| 45 | Male   | 145 | 61 | 131 | 68  | No        |
| 43 | Female | 148 | 60 | 130 | 69  | Yes       |
| 64 | Male   | 152 | 65 | 138 | 74  | Yes       |
| 66 | Female | 157 | 61 | 135 | 72  | No        |
| 58 | Female | 156 | 62 | 139 | 73  | Yes       |
| 58 | Male   | 178 | 59 | 139 | 77  | No        |
| 41 | Female | 173 | 58 | 120 | 74  | Yes       |
| 68 | Male   | 168 | 81 | 121 | 88  | Yes       |
| 52 | Male   | 179 | 71 | 125 | 78  | Yes       |
| 61 | Male   | 180 | 72 | 128 | 75  | No        |
| 43 | Female | 177 | 68 | 129 | 86  | Yes       |
| 50 | Male   | 145 | 65 | 131 | 84  | Yes       |
| 71 | Female | 156 | 87 | 127 | 85  | Yes       |
| 59 | Male   | 176 | 88 | 121 | 85  | Yes       |
| 44 | Male   | 172 | 71 | 143 | 94  | Yes       |
| 52 | Male   | 143 | 75 | 143 | 95  | Yes       |
| 49 | Male   | 147 | 76 | 143 | 92  | Yes       |
| 59 | Male   | 149 | 77 | 144 | 96  | No        |
| 64 | Male   | 156 | 65 | 146 | 96  | Yes       |
| 60 | Female | 155 | 67 | 150 | 76  | Yes       |
| 53 | Male   | 154 | 71 | 106 | 80  | Yes       |
| 48 | Male   | 152 | 72 | 105 | 80  | No        |
| 47 | Male   | 151 | 77 | 120 | 92  | Yes       |
| 60 | Female | 153 | 79 | 121 | 91  | Yes       |
| 51 | Male   | 158 | 75 | 129 | 90  | No        |
| 58 | Male   | 175 | 56 | 129 | 93  | Yes       |
| 62 | Male   | 173 | 56 | 129 | 94  | No        |
| 51 | Male   | 179 | 74 | 129 | 95  | Yes       |
| 58 | Male   | 177 | 67 | 130 | 96  | Yes       |

|    |        |     |    |     |    |     |
|----|--------|-----|----|-----|----|-----|
| 64 | Female | 176 | 61 | 135 | 92 | Yes |
| 67 | Male   | 179 | 65 | 138 | 92 | No  |
| 53 | Female | 178 | 76 | 105 | 80 | Yes |
| 57 | Female | 179 | 49 | 120 | 88 | Yes |
| 67 | Female | 174 | 49 | 127 | 89 | Yes |
| 41 | Male   | 167 | 55 | 125 | 90 | Yes |
| 53 | Female | 168 | 51 | 130 | 92 | Yes |
| 61 | Female | 156 | 58 | 131 | 97 | Yes |
| 63 | Male   | 159 | 58 | 129 | 96 | Yes |
| 59 | Female | 180 | 56 | 139 | 78 | Yes |
| 55 | Male   | 174 | 71 | 128 | 92 | No  |
| 42 | Female | 173 | 77 | 145 | 81 | Yes |
| 58 | Male   | 156 | 76 | 101 | 84 | Yes |
| 58 | Female | 154 | 69 | 108 | 85 | Yes |
| 58 | Female | 154 | 66 | 115 | 80 | No  |
| 58 | Female | 157 | 72 | 120 | 68 | Yes |
| 55 | Female | 159 | 73 | 128 | 78 | Yes |
| 63 | Female | 140 | 76 | 127 | 90 | No  |
| 53 | Female | 152 | 79 | 129 | 94 | Yes |
| 59 | Female | 155 | 56 | 130 | 92 | Yes |
| 54 | Female | 145 | 56 | 138 | 83 | No  |
| 56 | Female | 146 | 51 | 134 | 91 | Yes |
| 67 | Female | 165 | 65 | 135 | 96 | Yes |
| 48 | Female | 148 | 65 | 134 | 95 | No  |
| 62 | Male   | 153 | 62 | 135 | 94 | Yes |
| 41 | Male   | 154 | 69 | 142 | 98 | Yes |
| 51 | Female | 165 | 70 | 144 | 72 | No  |
| 57 | Male   | 173 | 71 | 145 | 85 | No  |
| 35 | Male   | 162 | 81 | 143 | 88 | No  |
| 62 | Female | 169 | 83 | 147 | 78 | Yes |
| 46 | Female | 144 | 83 | 105 | 95 | No  |
| 66 | Male   | 165 | 84 | 101 | 80 | Yes |
| 62 | Female | 167 | 84 | 109 | 80 | Yes |
| 35 | Male   | 156 | 78 | 103 | 80 | No  |
| 58 | Male   | 155 | 77 | 121 | 92 | Yes |
| 60 | Female | 176 | 71 | 123 | 94 | No  |
| 54 | Female | 178 | 77 | 128 | 95 | No  |
| 52 | Female | 179 | 70 | 127 | 92 | No  |
| 46 | Male   | 145 | 66 | 127 | 94 | No  |
| 45 | Male   | 156 | 72 | 128 | 88 | No  |
| 65 | Female | 176 | 51 | 128 | 75 | Yes |
| 76 | Female | 181 | 55 | 129 | 68 | Yes |
| 62 | Male   | 175 | 52 | 129 | 69 | Yes |
| 51 | Female | 174 | 51 | 130 | 78 | No  |
| 64 | Male   | 160 | 65 | 133 | 77 | Yes |
| 59 | Male   | 164 | 67 | 135 | 71 | No  |
| 56 | Female | 165 | 92 | 137 | 72 | Yes |

|    |        |     |    |     |    |     |
|----|--------|-----|----|-----|----|-----|
| 64 | Male   | 176 | 88 | 138 | 74 | Yes |
| 61 | Male   | 178 | 82 | 140 | 76 | No  |
| 55 | Male   | 165 | 81 | 142 | 75 | No  |
| 63 | Female | 153 | 81 | 145 | 83 | Yes |
| 58 | Female | 153 | 84 | 148 | 75 | No  |
| 38 | Male   | 155 | 67 | 152 | 96 | Yes |
| 53 | Male   | 156 | 78 | 133 | 97 | No  |
| 50 | Male   | 157 | 77 | 98  | 68 | No  |
| 54 | Male   | 156 | 75 | 99  | 69 | Yes |
| 51 | Male   | 157 | 75 | 127 | 90 | Yes |
| 43 | Female | 158 | 67 | 128 | 92 | Yes |
| 49 | Female | 159 | 65 | 130 | 95 | No  |
| 67 | Male   | 161 | 80 | 131 | 94 | Yes |
| 65 | Female | 165 | 81 | 137 | 93 | Yes |
| 55 | Male   | 166 | 82 | 139 | 91 | No  |
| 70 | Female | 176 | 69 | 144 | 75 | Yes |
| 54 | Male   | 171 | 65 | 90  | 68 | Yes |
| 51 | Male   | 172 | 62 | 99  | 86 | Yes |
| 69 | Male   | 143 | 61 | 95  | 78 | No  |
| 57 | Male   | 147 | 60 | 120 | 91 | Yes |
| 61 | Female | 149 | 65 | 123 | 93 | No  |
| 60 | Female | 156 | 61 | 127 | 91 | Yes |
| 60 | Male   | 155 | 62 | 128 | 99 | Yes |
| 43 | Male   | 154 | 59 | 129 | 98 | Yes |
| 67 | Male   | 152 | 58 | 131 | 95 | No  |
| 64 | Male   | 151 | 81 | 132 | 96 | Yes |
| 35 | Male   | 153 | 71 | 132 | 92 | No  |
| 59 | Male   | 158 | 72 | 133 | 80 | Yes |
| 43 | Male   | 175 | 71 | 137 | 88 | No  |
| 54 | Male   | 173 | 70 | 142 | 87 | Yes |
| 41 | Male   | 181 | 87 | 152 | 85 | Yes |
| 51 | Female | 177 | 88 | 100 | 80 | Yes |
| 62 | Male   | 176 | 83 | 137 | 92 | Yes |
| 64 | Male   | 179 | 45 | 138 | 97 | Yes |
| 63 | Female | 178 | 56 | 139 | 79 | Yes |
| 43 | Female | 179 | 67 | 142 | 88 | No  |
| 58 | Female | 174 | 71 | 143 | 88 | Yes |
| 44 | Female | 167 | 71 | 143 | 78 | No  |
| 60 | Female | 168 | 75 | 143 | 89 | Yes |
| 58 | Male   | 156 | 67 | 144 | 96 | Yes |
| 54 | Male   | 159 | 87 | 146 | 96 | Yes |
| 54 | Male   | 180 | 69 | 150 | 96 | Yes |
| 55 | Male   | 174 | 67 | 106 | 80 | No  |
| 61 | Male   | 173 | 59 | 105 | 80 | Yes |
| 59 | Male   | 156 | 81 | 108 | 78 | No  |
| 57 | Male   | 154 | 65 | 120 | 95 | Yes |
| 48 | Male   | 154 | 68 | 120 | 92 | No  |

|    |        |     |    |     |    |     |
|----|--------|-----|----|-----|----|-----|
| 39 | Female | 157 | 61 | 121 | 91 | Yes |
| 62 | Male   | 159 | 60 | 129 | 90 | No  |
| 49 | Male   | 140 | 59 | 129 | 93 | No  |
| 57 | Male   | 152 | 54 | 129 | 94 | No  |
| 60 | Female | 155 | 51 | 129 | 95 | No  |
| 52 | Male   | 145 | 55 | 130 | 96 | Yes |
| 56 | Male   | 146 | 51 | 135 | 92 | Yes |
| 55 | Male   | 165 | 56 | 138 | 92 | Yes |
| 41 | Male   | 148 | 70 | 105 | 80 | No  |
| 71 | Female | 153 | 70 | 120 | 88 | No  |
| 60 | Female | 154 | 76 | 127 | 89 | Yes |
| 44 | Male   | 165 | 77 | 125 | 90 | Yes |
| 54 | Male   | 173 | 65 | 130 | 92 | Yes |
| 58 | Male   | 162 | 67 | 131 | 97 | No  |
| 64 | Male   | 169 | 71 | 129 | 96 | Yes |
| 49 | Female | 147 | 72 | 139 | 71 | Yes |
| 43 | Female | 165 | 77 | 128 | 92 | No  |
| 51 | Male   | 167 | 79 | 145 | 96 | Yes |
| 45 | Female | 156 | 75 | 101 | 84 | Yes |
| 56 | Male   | 155 | 56 | 108 | 85 | Yes |
| 66 | Female | 176 | 56 | 115 | 80 | Yes |
| 59 | Male   | 178 | 74 | 120 | 68 | Yes |
| 45 | Male   | 179 | 67 | 128 | 78 | Yes |
| 56 | Male   | 145 | 61 | 127 | 90 | Yes |
| 46 | Female | 146 | 65 | 129 | 94 | Yes |
| 57 | Female | 143 | 89 | 105 | 86 | Yes |
| 51 | Female | 147 | 88 | 120 | 84 | No  |
| 41 | Female | 149 | 70 | 132 | 90 | No  |
| 63 | Female | 156 | 94 | 145 | 99 | Yes |
| 57 | Male   | 155 | 79 | 152 | 97 | No  |
| 59 | Female | 154 | 81 | 122 | 92 | Yes |
| 44 | Female | 152 | 82 | 105 | 94 | No  |
| 57 | Female | 140 | 52 | 92  | 68 | Yes |
| 63 | Female | 152 | 55 | 120 | 75 | No  |
| 70 | Male   | 155 | 56 | 108 | 78 | Yes |
| 60 | Female | 145 | 60 | 102 | 84 | Yes |
| 57 | Male   | 146 | 60 | 101 | 80 | Yes |
| 50 | Female | 165 | 61 | 101 | 81 | No  |
| 57 | Male   | 148 | 80 | 142 | 90 | Yes |
| 58 | Male   | 153 | 57 | 121 | 91 | Yes |
| 62 | Male   | 154 | 58 | 148 | 91 | No  |
| 41 | Male   | 165 | 70 | 145 | 89 | No  |
| 45 | Female | 180 | 75 | 101 | 78 | Yes |
| 46 | Male   | 179 | 79 | 108 | 82 | Yes |
| 66 | Female | 142 | 83 | 132 | 81 | No  |
| 54 | Male   | 140 | 52 | 112 | 88 | Yes |
| 62 | Female | 165 | 65 | 120 | 75 | Yes |

|    |        |     |     |     |    |     |
|----|--------|-----|-----|-----|----|-----|
| 63 | Female | 167 | 67  | 102 | 95 | Yes |
| 60 | Male   | 156 | 60  | 121 | 74 | Yes |
| 61 | Female | 155 | 67  | 120 | 88 | No  |
| 60 | Female | 150 | 80  | 119 | 83 | Yes |
| 51 | Female | 178 | 81  | 123 | 88 | Yes |
| 49 | Female | 179 | 83  | 98  | 95 | Yes |
| 61 | Female | 145 | 60  | 142 | 90 | Yes |
| 43 | Female | 146 | 80  | 130 | 80 | No  |
| 57 | Female | 140 | 65  | 132 | 78 | Yes |
| 66 | Female | 140 | 59  | 96  | 89 | Yes |
| 39 | Female | 152 | 57  | 120 | 81 | No  |
| 36 | Female | 150 | 59  | 115 | 95 | Yes |
| 57 | Female | 151 | 55  | 135 | 71 | Yes |
| 70 | Male   | 145 | 50  | 98  | 66 | Yes |
| 48 | Female | 149 | 53  | 121 | 80 | No  |
| 39 | Female | 145 | 54  | 131 | 78 | Yes |
| 60 | Female | 148 | 59  | 101 | 95 | No  |
| 42 | Female | 152 | 76  | 135 | 88 | Yes |
| 39 | Male   | 157 | 71  | 148 | 94 | No  |
| 63 | Female | 156 | 68  | 145 | 72 | Yes |
| 52 | Male   | 150 | 79  | 109 | 94 | Yes |
| 55 | Female | 152 | 85  | 152 | 67 | Yes |
| 53 | Male   | 179 | 88  | 108 | 95 | No  |
| 57 | Female | 152 | 87  | 128 | 87 | Yes |
| 58 | Female | 152 | 84  | 121 | 80 | Yes |
| 63 | Female | 152 | 82  | 111 | 84 | No  |
| 62 | Female | 145 | 65  | 105 | 71 | Yes |
| 70 | Female | 156 | 68  | 122 | 95 | Yes |
| 44 | Male   | 176 | 76  | 149 | 78 | No  |
| 54 | Female | 180 | 87  | 110 | 75 | Yes |
| 63 | Female | 160 | 90  | 135 | 77 | Yes |
| 64 | Female | 150 | 79  | 150 | 69 | No  |
| 60 | Female | 152 | 78  | 145 | 81 | Yes |
| 63 | Female | 145 | 79  | 147 | 85 | Yes |
| 53 | Male   | 165 | 100 | 145 | 95 | Yes |
| 62 | Male   | 176 | 99  | 145 | 71 | Yes |
| 45 | Male   | 160 | 87  | 152 | 88 | No  |
| 54 | Female | 165 | 90  | 121 | 81 | Yes |
| 42 | Male   | 153 | 83  | 111 | 75 | Yes |
| 46 | Male   | 153 | 76  | 109 | 78 | No  |
| 42 | Male   | 155 | 80  | 102 | 68 | No  |
| 45 | Female | 156 | 76  | 101 | 81 | Yes |
| 55 | Female | 157 | 68  | 109 | 90 | Yes |
| 52 | Male   | 156 | 64  | 108 | 80 | Yes |
| 67 | Male   | 157 | 67  | 121 | 69 | No  |
| 58 | Male   | 158 | 63  | 118 | 88 | No  |
| 57 | Male   | 159 | 59  | 123 | 68 | Yes |

|    |        |     |    |     |    |     |
|----|--------|-----|----|-----|----|-----|
| 64 | Male   | 161 | 61 | 132 | 73 | No  |
| 61 | Male   | 165 | 76 | 134 | 85 | No  |
| 50 | Female | 166 | 72 | 151 | 88 | No  |
| 43 | Female | 176 | 89 | 120 | 97 | Yes |
| 63 | Female | 171 | 66 | 134 | 78 | No  |
| 41 | Female | 172 | 88 | 111 | 85 | No  |
| 48 | Male   | 143 | 68 | 108 | 66 | Yes |
| 66 | Female | 147 | 76 | 135 | 87 | Yes |
| 45 | Female | 149 | 59 | 110 | 75 | Yes |
| 76 | Female | 156 | 78 | 112 | 78 | Yes |
| 53 | Male   | 155 | 77 | 110 | 88 | No  |
| 48 | Male   | 154 | 67 | 95  | 80 | Yes |
| 52 | Female | 152 | 76 | 142 | 91 | No  |
| 57 | Female | 151 | 68 | 98  | 89 | No  |
| 41 | Male   | 153 | 69 | 132 | 78 | Yes |
| 58 | Female | 158 | 64 | 121 | 82 | No  |
| 37 | Male   | 179 | 70 | 102 | 81 | No  |
| 58 | Male   | 180 | 70 | 107 | 88 | Yes |
| 64 | Male   | 180 | 89 | 101 | 75 | Yes |
| 66 | Female | 175 | 70 | 101 | 95 | Yes |
| 42 | Male   | 176 | 79 | 120 | 74 | Yes |
| 55 | Female | 167 | 70 | 125 | 92 | Yes |
| 63 | Female | 178 | 79 | 110 | 83 | No  |
| 58 | Female | 179 | 81 | 134 | 88 | Yes |
| 45 | Male   | 174 | 70 | 148 | 95 | Yes |
| 35 | Male   | 167 | 70 | 141 | 92 | Yes |
| 67 | Male   | 168 | 70 | 129 | 80 | Yes |
| 58 | Female | 156 | 70 | 130 | 78 | Yes |
| 41 | Female | 159 | 73 | 145 | 87 | No  |
| 44 | Male   | 180 | 83 | 134 | 81 | Yes |
| 41 | Male   | 174 | 84 | 134 | 95 | Yes |
| 62 | Female | 173 | 82 | 128 | 71 | Yes |
| 53 | Female | 156 | 76 | 132 | 72 | No  |
| 62 | Female | 154 | 79 | 120 | 80 | Yes |
| 62 | Male   | 154 | 78 | 120 | 78 | Yes |
| 66 | Male   | 157 | 80 | 101 | 95 | Yes |
| 51 | Male   | 159 | 86 | 142 | 88 | No  |
| 70 | Male   | 140 | 67 | 120 | 94 | Yes |
| 46 | Male   | 152 | 66 | 140 | 88 | Yes |
| 51 | Male   | 155 | 63 | 120 | 88 | Yes |
| 39 | Male   | 145 | 58 | 104 | 82 | Yes |
| 57 | Male   | 146 | 56 | 142 | 71 | No  |
| 51 | Male   | 165 | 67 | 121 | 92 | Yes |
| 66 | Male   | 148 | 58 | 99  | 84 | Yes |
| 47 | Male   | 153 | 61 | 118 | 81 | Yes |
| 57 | Male   | 154 | 63 | 120 | 88 | Yes |
| 52 | Female | 165 | 67 | 148 | 94 | No  |

|    |        |     |    |     |    |     |
|----|--------|-----|----|-----|----|-----|
| 53 | Female | 180 | 78 | 119 | 75 | Yes |
| 60 | Female | 150 | 79 | 101 | 73 | Yes |
| 71 | Female | 145 | 92 | 139 | 81 | Yes |
| 68 | Female | 141 | 54 | 118 | 88 | Yes |
| 64 | Female | 165 | 55 | 105 | 78 | Yes |
| 53 | Male   | 155 | 59 | 121 | 81 | Yes |
| 34 | Male   | 156 | 61 | 149 | 85 | Yes |
| 59 | Male   | 155 | 61 | 114 | 71 | Yes |
| 54 | Male   | 176 | 89 | 114 | 92 | Yes |
| 59 | Male   | 178 | 89 | 101 | 75 | Yes |
| 60 | Male   | 179 | 90 | 145 | 89 | Yes |
| 52 | Female | 145 | 60 | 135 | 92 | No  |
| 63 | Female | 146 | 66 | 110 | 66 | No  |
| 59 | Female | 165 | 64 | 104 | 77 | Yes |
| 74 | Male   | 155 | 67 | 119 | 90 | Yes |
| 65 | Female | 152 | 61 | 152 | 89 | Yes |
| 52 | Male   | 150 | 62 | 117 | 84 | No  |
| 54 | Male   | 151 | 85 | 146 | 88 | No  |
| 49 | Male   | 145 | 62 | 138 | 82 | Yes |
| 40 | Male   | 149 | 82 | 101 | 66 | Yes |
| 53 | Female | 145 | 75 | 117 | 89 | Yes |
| 52 | Male   | 148 | 72 | 123 | 78 | No  |
| 62 | Male   | 152 | 70 | 135 | 82 | No  |
| 69 | Male   | 157 | 67 | 101 | 92 | Yes |
| 49 | Male   | 156 | 66 | 107 | 79 | Yes |
| 74 | Female | 145 | 79 | 123 | 80 | Yes |
| 61 | Male   | 160 | 89 | 148 | 86 | No  |
| 59 | Male   | 165 | 90 | 118 | 65 | No  |
| 60 | Male   | 180 | 65 | 132 | 71 | Yes |
| 67 | Female | 162 | 94 | 109 | 90 | Yes |
| 56 | Male   | 178 | 65 | 142 | 95 | No  |
| 49 | Female | 145 | 49 | 142 | 65 | Yes |
| 65 | Female | 156 | 65 | 104 | 80 | Yes |
| 46 | Male   | 176 | 65 | 105 | 85 | Yes |
| 44 | Female | 150 | 88 | 98  | 85 | No  |
| 69 | Male   | 179 | 65 | 121 | 75 | No  |
| 64 | Female | 155 | 91 | 145 | 76 | Yes |
| 41 | Male   | 165 | 65 | 149 | 88 | Yes |
| 51 | Female | 163 | 88 | 118 | 77 | No  |
| 64 | Male   | 165 | 65 | 152 | 68 | Yes |
| 59 | Female | 160 | 81 | 101 | 69 | Yes |
| 62 | Female | 178 | 65 | 132 | 71 | Yes |
| 54 | Male   | 165 | 85 | 152 | 83 | No  |
| 64 | Male   | 153 | 80 | 100 | 88 | No  |
| 62 | Female | 153 | 80 | 120 | 95 | Yes |
| 62 | Female | 155 | 65 | 151 | 92 | Yes |
| 42 | Male   | 156 | 80 | 121 | 80 | No  |

|    |        |     |    |     |    |     |
|----|--------|-----|----|-----|----|-----|
| 56 | Male   | 157 | 80 | 99  | 78 | Yes |
| 54 | Male   | 156 | 54 | 95  | 89 | Yes |
| 57 | Male   | 157 | 80 | 111 | 81 | Yes |
| 63 | Female | 158 | 56 | 108 | 95 | No  |
| 44 | Female | 159 | 67 | 121 | 71 | Yes |
| 54 | Male   | 161 | 80 | 102 | 74 | Yes |
| 57 | Male   | 165 | 68 | 152 | 80 | Yes |
| 54 | Male   | 166 | 80 | 121 | 78 | Yes |
| 51 | Male   | 165 | 73 | 142 | 95 | Yes |
| 39 | Male   | 150 | 77 | 131 | 88 | No  |
| 66 | Female | 150 | 79 | 148 | 80 | Yes |
| 59 | Male   | 143 | 61 | 142 | 72 | Yes |
| 57 | Male   | 147 | 85 | 129 | 94 | Yes |
| 48 | Female | 149 | 54 | 108 | 87 | Yes |
| 65 | Female | 156 | 50 | 135 | 95 | Yes |
| 64 | Male   | 155 | 85 | 120 | 87 | Yes |
| 64 | Male   | 154 | 85 | 140 | 80 | Yes |
| 55 | Female | 152 | 85 | 150 | 84 | No  |
| 51 | Female | 151 | 51 | 112 | 71 | No  |
| 60 | Female | 153 | 85 | 142 | 89 | Yes |
| 41 | Female | 158 | 55 | 148 | 78 | No  |
| 58 | Female | 150 | 92 | 114 | 75 | Yes |
| 68 | Female | 160 | 88 | 131 | 77 | Yes |
| 55 | Female | 165 | 82 | 142 | 90 | No  |
| 59 | Male   | 155 | 81 | 151 | 88 | No  |
| 56 | Male   | 176 | 81 | 132 | 85 | No  |
| 41 | Male   | 167 | 55 | 138 | 95 | No  |
| 48 | Male   | 178 | 55 | 101 | 71 | Yes |
| 61 | Male   | 179 | 78 | 110 | 88 | Yes |
| 54 | Male   | 174 | 77 | 108 | 81 | Yes |
| 67 | Female | 167 | 55 | 104 | 75 | Yes |
| 56 | Male   | 168 | 55 | 101 | 78 | Yes |
| 66 | Male   | 156 | 55 | 145 | 68 | No  |
| 50 | Female | 159 | 80 | 110 | 81 | No  |
| 64 | Female | 165 | 80 | 132 | 90 | Yes |
| 64 | Female | 165 | 81 | 132 | 80 | No  |
| 68 | Male   | 173 | 55 | 123 | 69 | Yes |
| 37 | Female | 156 | 85 | 129 | 88 | Yes |
| 63 | Female | 154 | 85 | 118 | 68 | Yes |
| 64 | Female | 154 | 55 | 142 | 73 | No  |
| 44 | Male   | 157 | 55 | 131 | 85 | No  |
| 54 | Female | 159 | 85 | 95  | 88 | Yes |
| 52 | Male   | 140 | 55 | 131 | 97 | Yes |
| 42 | Female | 152 | 85 | 142 | 78 | Yes |
| 51 | Female | 155 | 85 | 138 | 85 | Yes |
| 60 | Female | 145 | 85 | 105 | 66 | Yes |
| 43 | Female | 146 | 58 | 102 | 87 | No  |



|    |        |     |    |     |    |     |
|----|--------|-----|----|-----|----|-----|
| 43 | Female | 165 | 85 | 128 | 75 | No  |
| 59 | Female | 148 | 71 | 143 | 78 | Yes |
| 43 | Female | 153 | 72 | 122 | 88 | Yes |
| 41 | Male   | 154 | 83 | 104 | 80 | Yes |
| 62 | Female | 165 | 90 | 120 | 91 | Yes |
| 59 | Female | 170 | 87 | 108 | 89 | Yes |
| 57 | Female | 172 | 75 | 105 | 92 | No  |
| 57 | Female | 143 | 76 | 140 | 79 | Yes |
| 35 | Male   | 147 | 56 | 152 | 80 | No  |
| 58 | Male   | 149 | 89 | 145 | 86 | Yes |
| 57 | Male   | 156 | 89 | 100 | 78 | Yes |
| 48 | Male   | 155 | 65 | 122 | 80 | No  |
| 45 | Female | 154 | 65 | 102 | 88 | No  |
| 56 | Male   | 152 | 62 | 101 | 90 | No  |
| 62 | Female | 151 | 69 | 145 | 92 | No  |
| 71 | Female | 153 | 89 | 109 | 71 | Yes |
| 47 | Male   | 158 | 71 | 120 | 95 | No  |
| 57 | Male   | 175 | 81 | 125 | 90 | Yes |
| 59 | Male   | 180 | 83 | 142 | 85 | Yes |
| 58 | Male   | 170 | 83 | 97  | 88 | Yes |
| 35 | Male   | 174 | 84 | 128 | 89 | No  |
| 54 | Male   | 176 | 84 | 120 | 75 | No  |
| 38 | Male   | 167 | 78 | 97  | 77 | No  |
| 65 | Female | 178 | 77 | 123 | 90 | Yes |
| 71 | Female | 179 | 71 | 100 | 88 | No  |
| 57 | Female | 174 | 77 | 127 | 89 | Yes |
| 47 | Male   | 167 | 70 | 109 | 92 | No  |
| 42 | Female | 168 | 73 | 152 | 82 | No  |
| 59 | Male   | 156 | 69 | 118 | 87 | No  |
| 54 | Female | 159 | 66 | 142 | 81 | Yes |
| 50 | Female | 180 | 86 | 99  | 82 | Yes |
| 68 | Female | 174 | 81 | 98  | 95 | Yes |
| 56 | Male   | 173 | 83 | 102 | 98 | Yes |
| 55 | Female | 156 | 69 | 101 | 97 | No  |
| 46 | Male   | 154 | 78 | 100 | 95 | Yes |
| 57 | Female | 154 | 71 | 115 | 98 | Yes |
| 48 | Male   | 157 | 71 | 114 | 91 | No  |
| 45 | Male   | 159 | 67 | 120 | 80 | Yes |
| 34 | Male   | 140 | 68 | 123 | 78 | No  |
| 54 | Male   | 146 | 57 | 108 | 88 | Yes |
| 66 | Male   | 165 | 58 | 132 | 94 | Yes |
| 55 | Female | 155 | 70 | 142 | 72 | No  |
| 55 | Male   | 152 | 75 | 145 | 94 | Yes |
| 48 | Male   | 150 | 79 | 152 | 87 | Yes |
| 52 | Female | 151 | 83 | 132 | 95 | Yes |
| 47 | Female | 145 | 52 | 120 | 87 | No  |
| 52 | Female | 149 | 65 | 122 | 80 | Yes |

|    |        |     |     |     |    |           |
|----|--------|-----|-----|-----|----|-----------|
| 58 | Male   | 145 | 67  | 118 | 84 | Yes       |
| 45 | Male   | 148 | 60  | 105 | 71 | Yes       |
| 74 | Female | 152 | 67  | 120 | 95 | No        |
| 48 | Male   | 157 | 80  | 123 | 78 | Yes       |
| 41 | Female | 156 | 81  | 126 | 75 | Yes       |
| 54 | Female | 178 | 83  | 127 | 77 | Yes       |
| 51 | Female | 181 | 60  | 128 | 99 | No        |
| 53 | Male   | 160 | 61  | 120 | 88 | Yes       |
| 38 | Male   | 180 | 65  | 123 | 85 | Yes       |
| 60 | Male   | 177 | 59  | 124 | 95 | Yes       |
| 52 | Male   | 149 | 57  | 125 | 90 | No        |
| 41 | Female | 145 | 59  | 124 | 90 | Yes       |
| 49 | Female | 156 | 55  | 120 | 84 | Yes       |
| 43 | Female | 176 | 50  | 90  | 88 | Yes       |
| 56 | Female | 180 | 53  | 93  | 82 | No        |
| 58 | Female | 160 | 54  | 92  | 66 | Yes       |
| 67 | Female | 174 | 59  | 94  | 89 | Yes       |
| 44 | Female | 157 | 76  | 99  | 78 | Yes       |
| 54 | Female | 165 | 71  | 100 | 82 | No        |
| 35 | Female | 165 | 68  | 124 | 92 | Yes       |
| 42 | Female | 176 | 79  | 125 | 79 | Yes       |
| 57 | Female | 140 | 50  | 95  | 80 | Not Known |
| 63 | Female | 152 | 55  | 121 | 86 | Not Known |
| 70 | Female | 169 | 82  | 110 | 65 | Not Known |
| 60 | Female | 145 | 65  | 92  | 80 | Not Known |
| 57 | Male   | 162 | 85  | 111 | 88 | Yes       |
| 52 | Female | 165 | 61  | 108 | 90 | No        |
| 57 | Female | 148 | 72  | 102 | 92 | Yes       |
| 58 | Male   | 172 | 80  | 101 | 98 | Not Known |
| 62 | Male   | 172 | 90  | 101 | 95 | Not Known |
| 41 | Male   | 165 | 70  | 142 | 90 | No        |
| 45 | Female | 172 | 100 | 121 | 85 | No        |
| 46 | Male   | 178 | 65  | 148 | 88 | Yes       |
| 74 | Female | 162 | 85  | 145 | 89 | Not Known |
| 54 | Male   | 144 | 70  | 101 | 75 | No        |
| 62 | Female | 165 | 88  | 108 | 77 | Not Known |
| 63 | Female | 172 | 88  | 132 | 90 | Not Known |
| 60 | Male   | 180 | 100 | 112 | 88 | Yes       |
| 61 | Male   | 155 | 50  | 120 | 89 | Not Known |
| 60 | Female | 172 | 93  | 102 | 92 | Not Known |
| 51 | Female | 178 | 81  | 121 | 82 | No        |
| 49 | Male   | 179 | 85  | 120 | 87 | Not Known |
| 61 | Female | 145 | 74  | 119 | 81 | Yes       |
| 43 | Female | 146 | 62  | 123 | 82 | No        |
| 57 | Male   | 165 | 75  | 98  | 95 | Not Known |
| 66 | Female | 177 | 90  | 142 | 88 | Not Known |
| 39 | Female | 152 | 57  | 130 | 97 | Yes       |

|    |        |     |     |     |    |           |
|----|--------|-----|-----|-----|----|-----------|
| 42 | Male   | 150 | 46  | 132 | 95 | No        |
| 57 | Male   | 175 | 95  | 96  | 98 | Yes       |
| 70 | Female | 145 | 50  | 120 | 91 | No        |
| 48 | Female | 149 | 53  | 115 | 80 | Yes       |
| 39 | Female | 145 | 72  | 135 | 78 | Not Known |
| 60 | Female | 159 | 65  | 98  | 87 | No        |
| 42 | Female | 175 | 85  | 121 | 90 | Yes       |
| 39 | Male   | 157 | 55  | 131 | 95 | No        |
| 63 | Male   | 177 | 75  | 101 | 92 | No        |
| 52 | Female | 178 | 96  | 135 | 97 | No        |
| 55 | Female | 178 | 105 | 148 | 82 | Not Known |
| 53 | Female | 162 | 92  | 145 | 90 | No        |
| 57 | Female | 170 | 92  | 109 | 93 | No        |
| 58 | Female | 168 | 102 | 152 | 78 | No        |
| 63 | Male   | 156 | 101 | 108 | 87 | Not Known |
| 62 | Female | 145 | 71  | 128 | 95 | Yes       |
| 70 | Female | 156 | 75  | 121 | 87 | Yes       |
| 44 | Male   | 176 | 76  | 111 | 80 | Yes       |
| 54 | Female | 140 | 68  | 105 | 84 | No        |
| 63 | Female | 172 | 103 | 122 | 71 | Yes       |
| 64 | Male   | 174 | 93  | 149 | 95 | Not Known |
| 60 | Male   | 178 | 109 | 110 | 78 | Yes       |
| 63 | Male   | 180 | 104 | 135 | 75 | Not Known |
| 53 | Male   | 181 | 100 | 151 | 77 | Yes       |
| 62 | Male   | 176 | 95  | 145 | 99 | Not Known |
| 45 | Male   | 178 | 80  | 147 | 88 | Yes       |
| 54 | Female | 165 | 90  | 145 | 85 | Not Known |
| 42 | Female | 153 | 48  | 145 | 83 | Yes       |
| 46 | Female | 153 | 76  | 152 | 71 | Yes       |
| 42 | Male   | 155 | 80  | 121 | 88 | Not Known |
| 45 | Female | 156 | 58  | 111 | 81 | Not Known |
| 55 | Female | 157 | 60  | 109 | 75 | Yes       |
| 52 | Female | 156 | 50  | 102 | 78 | Not Known |
| 67 | Male   | 178 | 50  | 101 | 68 | Yes       |
| 58 | Female | 175 | 77  | 109 | 81 | Not Known |
| 57 | Female | 180 | 102 | 108 | 90 | Not Known |
| 64 | Male   | 177 | 75  | 121 | 80 | No        |
| 61 | Male   | 165 | 55  | 118 | 69 | No        |
| 50 | Male   | 175 | 70  | 123 | 88 | No        |
| 43 | Male   | 176 | 95  | 132 | 68 | Yes       |
| 63 | Female | 171 | 68  | 134 | 73 | No        |
| 41 | Male   | 172 | 89  | 151 | 85 | Yes       |
| 48 | Female | 143 | 68  | 120 | 88 | Yes       |
| 66 | Female | 147 | 76  | 134 | 97 | Yes       |
| 51 | Female | 149 | 73  | 111 | 78 | Yes       |
| 76 | Female | 156 | 73  | 108 | 85 | Yes       |
| 53 | Male   | 156 | 55  | 135 | 66 | Not Known |

|    |        |     |     |     |    |           |
|----|--------|-----|-----|-----|----|-----------|
| 48 | Male   | 154 | 77  | 110 | 87 | Not Known |
| 52 | Male   | 152 | 50  | 112 | 75 | Yes       |
| 41 | Female | 153 | 80  | 110 | 78 | Not Known |
| 58 | Male   | 179 | 64  | 95  | 88 | Yes       |
| 37 | Female | 176 | 75  | 142 | 80 | Yes       |
| 58 | Female | 156 | 77  | 98  | 87 | No        |
| 64 | Female | 174 | 104 | 132 | 84 | Yes       |
| 66 | Female | 164 | 83  | 121 | 90 | No        |
| 42 | Female | 176 | 82  | 102 | 82 | No        |
| 55 | Female | 178 | 75  | 107 | 74 | No        |
| 45 | Male   | 174 | 75  | 101 | 80 | Yes       |
| 35 | Female | 167 | 76  | 101 | 88 | No        |
| 67 | Female | 168 | 72  | 120 | 85 | No        |
| 41 | Female | 170 | 76  | 125 | 90 | Yes       |
| 44 | Female | 180 | 105 | 110 | 81 | No        |
| 41 | Female | 159 | 52  | 134 | 78 | Yes       |
| 62 | Female | 173 | 90  | 148 | 84 | Yes       |
| 53 | Female | 156 | 65  | 110 | 88 | No        |
| 62 | Male   | 154 | 65  | 95  | 75 | Not Known |
| 62 | Male   | 158 | 60  | 142 | 91 | No        |
| 66 | Male   | 178 | 103 | 98  | 85 | Not Known |
| 38 | Male   | 159 | 75  | 132 | 74 | No        |
| 70 | Male   | 140 | 67  | 121 | 75 | Not Known |
| 46 | Male   | 158 | 55  | 102 | 88 | No        |
| 51 | Male   | 155 | 58  | 107 | 91 | Not Known |
| 39 | Male   | 145 | 68  | 101 | 80 | Yes       |
| 51 | Male   | 165 | 86  | 101 | 78 | Yes       |
| 66 | Female | 170 | 73  | 120 | 81 | Not Known |
| 47 | Male   | 168 | 60  | 125 | 80 | Not Known |
| 28 | Female | 165 | 67  | 110 | 69 | No        |
| 53 | Female | 174 | 70  | 134 | 91 | Yes       |
| 60 | Female | 174 | 70  | 148 | 86 | Yes       |
| 71 | Female | 172 | 106 | 141 | 90 | Not Known |
| 68 | Female | 142 | 40  | 129 | 88 | Not Known |
| 64 | Female | 165 | 55  | 130 | 81 | No        |
| 31 | Male   | 167 | 75  | 145 | 65 | Not Known |
| 34 | Male   | 165 | 80  | 134 | 68 | Yes       |
| 59 | Female | 179 | 85  | 134 | 88 | Yes       |
| 54 | Male   | 176 | 98  | 128 | 88 | No        |
| 59 | Male   | 171 | 88  | 132 | 82 | No        |
| 60 | Male   | 179 | 74  | 120 | 71 | Not Known |
| 52 | Female | 148 | 51  | 120 | 92 | Yes       |
| 59 | Female | 165 | 71  | 101 | 84 | Not Known |
| 74 | Male   | 171 | 60  | 142 | 81 | No        |
| 65 | Male   | 152 | 71  | 120 | 88 | Yes       |
| 52 | Female | 150 | 74  | 140 | 90 | No        |
| 54 | Female | 151 | 74  | 120 | 75 | No        |

|    |        |     |     |     |    |           |
|----|--------|-----|-----|-----|----|-----------|
| 49 | Male   | 145 | 55  | 104 | 73 | Yes       |
| 40 | Male   | 149 | 55  | 142 | 81 | No        |
| 31 | Female | 145 | 42  | 121 | 88 | No        |
| 52 | Male   | 148 | 72  | 99  | 78 | Not Known |
| 62 | Male   | 180 | 70  | 118 | 81 | Not Known |
| 69 | Female | 179 | 80  | 120 | 85 | Not Known |
| 49 | Male   | 156 | 78  | 148 | 71 | Not Known |
| 74 | Female | 169 | 99  | 119 | 92 | Yes       |
| 61 | Male   | 179 | 107 | 101 | 75 | Not Known |
| 59 | Female | 159 | 99  | 139 | 89 | No        |
| 67 | Female | 170 | 100 | 118 | 92 | Not Known |
| 56 | Male   | 157 | 98  | 105 | 66 | No        |
| 49 | Female | 145 | 50  | 121 | 77 | No        |
| 65 | Female | 156 | 70  | 149 | 90 | Not Known |
| 46 | Male   | 176 | 76  | 114 | 90 | Yes       |
| 44 | Male   | 181 | 76  | 114 | 84 | Yes       |
| 69 | Male   | 181 | 100 | 101 | 88 | Yes       |
| 64 | Male   | 154 | 93  | 145 | 82 | Not Known |
| 41 | Male   | 154 | 68  | 135 | 66 | No        |
| 51 | Female | 154 | 107 | 110 | 89 | No        |
| 64 | Female | 165 | 69  | 104 | 78 | Not Known |
| 62 | Female | 178 | 77  | 119 | 82 | No        |
| 54 | Male   | 178 | 86  | 152 | 92 | No        |
| 64 | Male   | 148 | 76  | 117 | 79 | Yes       |
| 62 | Female | 153 | 73  | 150 | 80 | Not Known |
| 42 | Female | 156 | 77  | 138 | 86 | Yes       |
| 56 | Female | 157 | 76  | 101 | 72 | Yes       |
| 54 | Male   | 180 | 65  | 117 | 71 | No        |
| 44 | Female | 159 | 75  | 123 | 90 | No        |
| 51 | Male   | 176 | 96  | 135 | 95 | Not Known |
| 39 | Male   | 171 | 68  | 101 | 65 | No        |
| 66 | Female | 172 | 90  | 107 | 80 | Not Known |
| 48 | Female | 149 | 54  | 123 | 85 | No        |
| 65 | Female | 156 | 52  | 148 | 85 | Not Known |
| 64 | Female | 145 | 75  | 118 | 75 | Yes       |
| 55 | Female | 152 | 60  | 132 | 76 | Not Known |
| 51 | Female | 151 | 51  | 109 | 88 | No        |
| 41 | Female | 158 | 67  | 142 | 77 | No        |
| 68 | Female | 181 | 102 | 142 | 68 | Yes       |
| 55 | Female | 181 | 100 | 104 | 69 | No        |
| 56 | Female | 168 | 70  | 105 | 71 | Yes       |
| 41 | Female | 166 | 101 | 98  | 78 | No        |
| 48 | Male   | 178 | 67  | 121 | 84 | No        |
| 61 | Female | 179 | 86  | 145 | 78 | Not Known |
| 67 | Female | 154 | 62  | 149 | 88 | Yes       |
| 56 | Female | 178 | 85  | 118 | 95 | Not Known |
| 66 | Male   | 168 | 53  | 152 | 78 | No        |

|    |        |     |     |     |    |           |
|----|--------|-----|-----|-----|----|-----------|
| 50 | Female | 180 | 79  | 101 | 78 | Yes       |
| 68 | Male   | 173 | 69  | 132 | 78 | Not Known |
| 37 | Female | 156 | 78  | 152 | 66 | Not Known |
| 44 | Female | 157 | 50  | 100 | 88 | No        |
| 52 | Female | 140 | 45  | 120 | 66 | No        |
| 42 | Male   | 152 | 71  | 151 | 80 | No        |
| 51 | Male   | 155 | 73  | 121 | 80 | Yes       |
| 43 | Female | 146 | 75  | 99  | 98 | No        |
| 43 | Male   | 165 | 75  | 95  | 80 | Not Known |
| 43 | Female | 153 | 49  | 111 | 90 | No        |
| 41 | Male   | 178 | 62  | 108 | 88 | Yes       |
| 62 | Female | 177 | 69  | 121 | 67 | Yes       |
| 61 | Female | 165 | 85  | 102 | 98 | Yes       |
| 48 | Female | 167 | 88  | 152 | 80 | Yes       |
| 61 | Male   | 155 | 72  | 121 | 71 | Not Known |
| 51 | Female | 178 | 78  | 142 | 68 | Not Known |
| 55 | Female | 179 | 80  | 131 | 95 | Yes       |
| 77 | Female | 155 | 54  | 148 | 88 | No        |
| 44 | Female | 152 | 54  | 147 | 78 | No        |
| 44 | Male   | 150 | 65  | 129 | 64 | No        |
| 31 | Male   | 151 | 50  | 108 | 66 | Yes       |
| 69 | Male   | 169 | 65  | 135 | 84 | Not Known |
| 76 | Female | 169 | 74  | 120 | 81 | Not Known |
| 68 | Female | 178 | 102 | 140 | 71 | Yes       |
| 67 | Female | 177 | 88  | 150 | 81 | Not Known |
| 41 | Female | 154 | 76  | 112 | 92 | No        |
| 43 | Female | 173 | 72  | 142 | 80 | No        |
| 51 | Male   | 162 | 67  | 143 | 88 | Yes       |
| 51 | Female | 176 | 77  | 114 | 92 | No        |
| 70 | Male   | 175 | 105 | 131 | 76 | Not Known |
| 67 | Female | 162 | 98  | 142 | 86 | No        |
| 50 | Male   | 162 | 56  | 151 | 69 | No        |
| 47 | Female | 162 | 74  | 132 | 93 | Yes       |
| 55 | Male   | 165 | 70  | 138 | 90 | Yes       |
| 43 | Male   | 176 | 61  | 101 | 74 | Yes       |
| 65 | Female | 165 | 83  | 110 | 84 | Not Known |
| 67 | Female | 153 | 62  | 108 | 82 | Not Known |
| 35 | Female | 153 | 50  | 104 | 90 | No        |
| 76 | Male   | 181 | 75  | 101 | 82 | Not Known |
| 52 | Male   | 165 | 65  | 145 | 95 | Yes       |
| 77 | Female | 158 | 85  | 110 | 98 | Yes       |
| 56 | Female | 159 | 62  | 132 | 90 | No        |
| 45 | Female | 166 | 66  | 132 | 98 | No        |
| 32 | Male   | 176 | 85  | 123 | 80 | No        |
| 35 | Female | 147 | 45  | 129 | 95 | Yes       |
| 45 | Female | 154 | 56  | 118 | 99 | No        |
| 71 | Female | 153 | 74  | 142 | 80 | Yes       |

|    |        |     |     |     |    |           |
|----|--------|-----|-----|-----|----|-----------|
| 47 | Female | 158 | 78  | 131 | 80 | No        |
| 35 | Female | 180 | 110 | 95  | 83 | No        |
| 38 | Male   | 171 | 72  | 131 | 78 | Yes       |
| 65 | Female | 178 | 77  | 142 | 86 | Not Known |
| 71 | Male   | 179 | 71  | 138 | 88 | No        |
| 47 | Male   | 167 | 70  | 105 | 88 | Yes       |
| 42 | Female | 168 | 80  | 102 | 88 | No        |
| 50 | Female | 170 | 80  | 128 | 70 | Not Known |
| 68 | Female | 149 | 96  | 146 | 74 | No        |
| 46 | Male   | 162 | 78  | 122 | 92 | Not Known |
| 48 | Female | 157 | 56  | 104 | 87 | Yes       |
| 45 | Male   | 159 | 67  | 120 | 87 | No        |
| 34 | Male   | 140 | 45  | 108 | 66 | No        |
| 25 | Female | 155 | 53  | 99  | 66 | No        |
| 52 | Female | 145 | 48  | 105 | 80 | No        |
| 41 | Female | 146 | 43  | 124 | 80 | Yes       |
| 44 | Female | 153 | 51  | 112 | 74 | Yes       |
| 65 | Male   | 165 | 88  | 140 | 82 | Not Known |
| 45 | Female | 177 | 81  | 152 | 78 | Not Known |
| 44 | Female | 165 | 71  | 112 | 72 | Not Known |
| 38 | Male   | 178 | 105 | 114 | 90 | No        |
| 44 | Male   | 155 | 77  | 118 | 79 | Yes       |
| 43 | Female | 176 | 98  | 132 | 80 | Yes       |
| 48 | Female | 178 | 99  | 108 | 80 | Not Known |
| 35 | Female | 175 | 98  | 132 | 98 | Yes       |
| 49 | Female | 145 | 74  | 132 | 81 | No        |
| 48 | Female | 150 | 55  | 120 | 66 | No        |
| 47 | Male   | 145 | 47  | 135 | 95 | No        |
| 45 | Female | 148 | 62  | 123 | 77 | Yes       |
| 74 | Female | 149 | 55  | 101 | 87 | No        |
| 41 | Male   | 156 | 60  | 141 | 82 | Yes       |
| 51 | Male   | 181 | 63  | 142 | 92 | No        |
| 38 | Female | 156 | 65  | 132 | 88 | Yes       |
| 41 | Female | 145 | 78  | 147 | 66 | No        |
| 49 | Female | 156 | 55  | 128 | 89 | No        |
| 43 | Female | 176 | 62  | 118 | 78 | No        |
| 44 | Male   | 176 | 108 | 147 | 88 | Not Known |
| 35 | Female | 165 | 68  | 120 | 95 | No        |
| 37 | Female | 159 | 66  | 120 | 80 | Yes       |
| 39 | Female | 166 | 70  | 114 | 98 | Yes       |
| 49 | Male   | 143 | 67  | 149 | 91 | Yes       |
| 43 | Male   | 149 | 55  | 138 | 68 | No        |
| 38 | Female | 158 | 51  | 121 | 90 | No        |
| 43 | Male   | 152 | 50  | 131 | 70 | Yes       |
| 45 | Female | 179 | 65  | 138 | 75 | No        |
| 40 | Male   | 156 | 76  | 120 | 85 | Yes       |
| 71 | Male   | 159 | 62  | 121 | 69 | No        |

|    |        |     |     |     |    |           |
|----|--------|-----|-----|-----|----|-----------|
| 68 | Male   | 145 | 42  | 110 | 75 | Yes       |
| 65 | Female | 148 | 75  | 126 | 81 | Not Known |
| 47 | Female | 154 | 51  | 121 | 80 | yes       |
| 68 | Female | 162 | 76  | 114 | 77 | Not Known |
| 35 | Female | 154 | 62  | 129 | 92 | No        |
| 40 | Female | 140 | 62  | 130 | 82 | Yes       |
| 39 | Female | 165 | 60  | 101 | 78 | No        |
| 69 | Female | 162 | 99  | 105 | 82 | Yes       |
| 50 | Female | 165 | 85  | 138 | 86 | No        |
| 47 | Female | 151 | 92  | 152 | 81 | No        |
| 45 | Female | 173 | 85  | 145 | 87 | No        |
| 39 | Female | 174 | 68  | 100 | 72 | Yes       |
| 71 | Female | 145 | 68  | 122 | 79 | Yes       |
| 69 | Female | 158 | 60  | 102 | 83 | Not Known |
| 73 | Male   | 179 | 105 | 101 | 88 | Not Known |
| 38 | Male   | 180 | 75  | 145 | 66 | Yes       |
| 69 | Male   | 156 | 59  | 109 | 86 | No        |
| 73 | Female | 169 | 70  | 120 | 85 | No        |
| 46 | Female | 165 | 62  | 125 | 79 | No        |
| 70 | Female | 150 | 55  | 142 | 72 | No        |
| 39 | Male   | 145 | 52  | 97  | 77 | No        |
| 65 | Female | 152 | 71  | 128 | 78 | No        |
| 72 | Male   | 181 | 102 | 120 | 80 | No        |
| 34 | Male   | 170 | 60  | 97  | 87 | Yes       |
| 65 | Male   | 165 | 77  | 123 | 89 | Yes       |
| 73 | Female | 172 | 76  | 100 | 90 | Not Known |
| 68 | Male   | 171 | 109 | 127 | 76 | Yes       |
| 68 | Female | 157 | 54  | 109 | 79 | No        |
| 40 | Male   | 140 | 66  | 152 | 85 | Not Known |
| 35 | Male   | 178 | 85  | 118 | 74 | Yes       |
| 46 | Female | 146 | 65  | 142 | 90 | No        |
| 46 | Male   | 179 | 99  | 152 | 88 | Yes       |
| 40 | Female | 147 | 62  | 145 | 88 | No        |
| 39 | Female | 151 | 52  | 128 | 99 | No        |
| 46 | Female | 165 | 65  | 120 | 87 | No        |
| 46 | Female | 145 | 73  | 118 | 78 | Yes       |
| 77 | Female | 165 | 65  | 142 | 86 | Not Known |
| 25 | Male   | 177 | 75  | 92  | 65 | No        |
| 54 | Male   | 174 | 59  | 99  | 88 | Yes       |
| 59 | Male   | 168 | 82  | 98  | 94 | No        |
| 47 | Male   | 169 | 85  | 95  | 88 | Yes       |
| 77 | Male   | 165 | 67  | 99  | 88 | Yes       |
| 45 | Female | 176 | 76  | 94  | 82 | Yes       |
| 58 | Male   | 178 | 68  | 102 | 71 | No        |
| 46 | Male   | 165 | 69  | 108 | 92 | Yes       |
| 67 | Male   | 153 | 64  | 110 | 84 | Yes       |
| 69 | Female | 153 | 92  | 121 | 81 | Yes       |



|    |        |     |    |     |    |     |
|----|--------|-----|----|-----|----|-----|
| 49 | Female | 155 | 90 | 99  | 88 | No  |
| 58 | Female | 156 | 89 | 98  | 94 | Yes |
| 66 | Female | 157 | 88 | 92  | 75 | Yes |
| 52 | Female | 156 | 79 | 91  | 73 | Yes |
| 57 | Male   | 157 | 94 | 120 | 81 | Yes |
| 60 | Male   | 158 | 79 | 123 | 88 | No  |
| 41 | Male   | 159 | 81 | 101 | 78 | Yes |
| 46 | Female | 161 | 82 | 104 | 81 | Yes |
| 58 | Female | 165 | 76 | 115 | 85 | Yes |
| 43 | Female | 166 | 78 | 112 | 71 | No  |
| 71 | Female | 176 | 75 | 102 | 92 | Yes |
| 69 | Female | 171 | 73 | 105 | 75 | Yes |
| 59 | Female | 174 | 79 | 131 | 90 | No  |
| 41 | Male   | 167 | 92 | 123 | 95 | Yes |
| 41 | Male   | 168 | 54 | 125 | 65 | Yes |
| 46 | Male   | 156 | 55 | 128 | 80 | Yes |
| 68 | Male   | 159 | 59 | 124 | 85 | No  |
| 71 | Female | 180 | 61 | 129 | 85 | Yes |
| 62 | Female | 174 | 61 | 126 | 75 | Yes |
| 46 | Female | 173 | 89 | 110 | 76 | Yes |
| 70 | Male   | 156 | 89 | 100 | 88 | Yes |
| 41 | Male   | 154 | 90 | 102 | 77 | Yes |
| 40 | Female | 154 | 60 | 103 | 68 | No  |
| 62 | Female | 157 | 66 | 105 | 69 | No  |
| 35 | Male   | 159 | 64 | 108 | 81 | Yes |
| 44 | Male   | 140 | 67 | 107 | 83 | Yes |
| 60 | Male   | 152 | 61 | 106 | 88 | Yes |
| 58 | Male   | 155 | 62 | 104 | 95 | No  |
| 59 | Male   | 145 | 90 | 109 | 92 | Yes |
| 54 | Male   | 146 | 62 | 103 | 80 | Yes |
| 44 | Male   | 165 | 92 | 102 | 78 | Yes |
| 45 | Male   | 148 | 75 | 108 | 89 | Yes |
| 47 | Male   | 153 | 72 | 120 | 81 | Yes |
| 41 | Female | 154 | 70 | 111 | 95 | No  |
| 44 | Female | 165 | 67 | 102 | 71 | No  |
| 57 | Male   | 181 | 66 | 121 | 99 | Yes |
| 66 | Male   | 179 | 79 | 122 | 80 | Yes |
| 51 | Female | 179 | 89 | 135 | 78 | Yes |
| 54 | Male   | 143 | 90 | 145 | 95 | No  |
| 56 | Female | 165 | 93 | 152 | 88 | Yes |
| 57 | Male   | 167 | 94 | 135 | 94 | Yes |
| 54 | Male   | 156 | 87 | 137 | 72 | Yes |
| 40 | Male   | 155 | 49 | 138 | 94 | Yes |
| 67 | Male   | 176 | 58 | 129 | 87 | Yes |
| 43 | Male   | 178 | 84 | 90  | 95 | No  |
| 41 | Male   | 179 | 88 | 99  | 87 | No  |
| 58 | Female | 145 | 94 | 98  | 80 | Yes |

|    |        |     |    |     |    |     |
|----|--------|-----|----|-----|----|-----|
| 58 | Male   | 146 | 91 | 97  | 84 | Yes |
| 55 | Female | 165 | 68 | 90  | 71 | Yes |
| 34 | Male   | 155 | 88 | 95  | 95 | No  |
| 51 | Female | 152 | 69 | 96  | 78 | Yes |
| 57 | Female | 150 | 81 | 99  | 75 | Yes |
| 67 | Male   | 151 | 83 | 97  | 77 | Yes |
| 47 | Female | 145 | 85 | 93  | 99 | Yes |
| 58 | Female | 149 | 76 | 92  | 88 | Yes |
| 52 | Female | 145 | 71 | 100 | 85 | No  |
| 50 | Female | 148 | 72 | 110 | 95 | No  |
| 44 | Male   | 152 | 77 | 102 | 71 | Yes |
| 54 | Male   | 157 | 66 | 104 | 88 | Yes |
| 44 | Male   | 156 | 54 | 106 | 81 | Yes |
| 62 | Male   | 178 | 58 | 120 | 75 | No  |
| 57 | Male   | 181 | 56 | 121 | 78 | Yes |
| 54 | Female | 179 | 67 | 135 | 68 | Yes |
| 65 | Female | 181 | 65 | 142 | 81 | Yes |
| 45 | Female | 168 | 68 | 152 | 90 | Yes |
| 56 | Male   | 173 | 69 | 150 | 80 | Yes |
| 46 | Male   | 145 | 73 | 142 | 69 | No  |
| 54 | Female | 156 | 77 | 124 | 88 | No  |
| 63 | Female | 176 | 79 | 132 | 68 | Yes |
| 64 | Female | 181 | 61 | 134 | 73 | Yes |
| 76 | Female | 179 | 55 | 129 | 85 | Yes |
| 40 | Female | 174 | 54 | 127 | 88 | No  |
| 59 | Male   | 174 | 50 | 125 | 97 | Yes |
| 63 | Female | 172 | 51 | 102 | 78 | Yes |
| 55 | Female | 165 | 55 | 105 | 85 | Yes |
| 71 | Female | 176 | 52 | 123 | 66 | No  |
| 52 | Male   | 178 | 51 | 149 | 87 | No  |
| 56 | Male   | 165 | 65 | 138 | 75 | Yes |
| 54 | Female | 153 | 67 | 121 | 78 | Yes |
| 59 | Female | 153 | 92 | 131 | 88 | Yes |
| 46 | Female | 155 | 88 | 138 | 80 | No  |
| 55 | Female | 156 | 82 | 120 | 91 | Yes |
| 56 | Male   | 157 | 81 | 121 | 89 | Yes |
| 61 | Female | 156 | 81 | 110 | 78 | Yes |
| 40 | Male   | 157 | 84 | 126 | 82 | No  |
| 59 | Male   | 158 | 67 | 121 | 81 | No  |
| 60 | Male   | 159 | 78 | 114 | 88 | Yes |
| 58 | Male   | 161 | 77 | 129 | 75 | Yes |
| 59 | Female | 165 | 75 | 130 | 95 | Yes |
| 44 | Female | 166 | 75 | 101 | 74 | No  |
| 53 | Female | 176 | 67 | 105 | 92 | Yes |
| 57 | Male   | 171 | 65 | 138 | 83 | Yes |
| 58 | Female | 172 | 80 | 152 | 86 | Yes |
| 54 | Male   | 143 | 81 | 145 | 95 | No  |

|    |        |     |    |     |    |     |
|----|--------|-----|----|-----|----|-----|
| 62 | Male   | 147 | 82 | 100 | 92 | No  |
| 57 | Male   | 149 | 69 | 122 | 80 | Yes |
| 67 | Male   | 156 | 65 | 102 | 78 | Yes |
| 57 | Male   | 155 | 62 | 101 | 89 | Yes |
| 52 | Female | 154 | 61 | 145 | 81 | No  |
| 38 | Female | 152 | 60 | 109 | 88 | Yes |
| 52 | Male   | 151 | 65 | 120 | 95 | Yes |
| 44 | Male   | 153 | 61 | 125 | 92 | Yes |
| 50 | Male   | 158 | 62 | 142 | 80 | No  |
| 62 | Male   | 179 | 59 | 97  | 78 | No  |
| 58 | Female | 181 | 58 | 128 | 89 | Yes |
| 61 | Male   | 181 | 81 | 120 | 81 | Yes |
| 63 | Male   | 175 | 71 | 97  | 95 | Yes |
| 65 | Female | 176 | 72 | 123 | 71 | No  |
| 64 | Male   | 167 | 93 | 100 | 99 | Yes |
| 44 | Female | 178 | 96 | 127 | 80 | Yes |
| 57 | Female | 179 | 87 | 109 | 78 | Yes |
| 52 | Female | 174 | 88 | 152 | 87 | No  |
| 53 | Female | 167 | 83 | 118 | 88 | No  |
| 67 | Male   | 168 | 45 | 142 | 94 | Yes |
| 58 | Male   | 156 | 56 | 99  | 72 | Yes |
| 41 | Male   | 159 | 67 | 98  | 94 | No  |
| 50 | Male   | 180 | 71 | 102 | 87 | Yes |
| 41 | Male   | 174 | 71 | 101 | 95 | No  |
| 29 | Female | 173 | 75 | 100 | 87 | No  |
| 61 | Male   | 156 | 67 | 115 | 80 | No  |
| 45 | Female | 154 | 87 | 114 | 84 | No  |
| 59 | Male   | 154 | 69 | 120 | 71 | No  |
| 63 | Female | 157 | 67 | 123 | 95 | Yes |
| 58 | Female | 159 | 59 | 132 | 78 | Yes |
| 65 | Female | 140 | 81 | 111 | 75 | Yes |
| 66 | Female | 152 | 65 | 120 | 77 | Yes |
| 45 | Female | 155 | 68 | 151 | 99 | No  |
| 64 | Female | 145 | 61 | 142 | 82 | Yes |
| 62 | Female | 146 | 60 | 123 | 85 | Yes |
| 35 | Male   | 165 | 59 | 132 | 95 | No  |
| 53 | Male   | 148 | 54 | 128 | 90 | Yes |
| 59 | Female | 153 | 51 | 99  | 90 | No  |
| 35 | Male   | 154 | 55 | 135 | 84 | No  |
| 64 | Male   | 165 | 51 | 124 | 88 | Yes |
| 63 | Male   | 181 | 56 | 120 | 82 | Yes |
| 49 | Male   | 179 | 68 | 125 | 66 | Yes |
| 62 | Male   | 179 | 78 | 132 | 89 | Yes |
| 45 | Male   | 145 | 76 | 125 | 78 | Yes |
| 35 | Female | 165 | 77 | 128 | 82 | Yes |
| 53 | Female | 167 | 65 | 99  | 92 | Yes |
| 42 | Female | 156 | 67 | 98  | 79 | No  |

|    |        |     |    |     |    |     |
|----|--------|-----|----|-----|----|-----|
| 62 | Female | 155 | 71 | 99  | 80 | Yes |
| 55 | Male   | 176 | 72 | 99  | 86 | Yes |
| 61 | Male   | 178 | 77 | 102 | 80 | No  |
| 44 | Male   | 179 | 79 | 108 | 80 | Yes |
| 59 | Male   | 145 | 75 | 132 | 88 | Yes |
| 49 | Male   | 146 | 56 | 142 | 90 | Yes |
| 68 | Male   | 165 | 56 | 145 | 92 | No  |
| 65 | Female | 155 | 74 | 152 | 80 | Yes |
| 59 | Male   | 152 | 67 | 132 | 95 | Yes |
| 54 | Female | 150 | 61 | 120 | 90 | No  |
| 57 | Male   | 151 | 65 | 122 | 85 | Yes |
| 61 | Male   | 145 | 76 | 118 | 88 | Yes |
| 53 | Female | 149 | 49 | 105 | 89 | Yes |
| 29 | Male   | 145 | 49 | 120 | 75 | No  |
| 56 | Female | 148 | 55 | 123 | 77 | Yes |
| 52 | Male   | 152 | 51 | 126 | 90 | Yes |
| 70 | Male   | 157 | 58 | 127 | 88 | No  |
| 47 | Male   | 156 | 58 | 128 | 89 | Yes |
| 53 | Male   | 178 | 56 | 120 | 92 | Yes |
| 66 | Male   | 177 | 71 | 123 | 82 | Yes |
| 46 | Male   | 179 | 77 | 124 | 87 | No  |
| 56 | Male   | 181 | 76 | 125 | 81 | Yes |
| 57 | Male   | 169 | 69 | 124 | 82 | Yes |
| 62 | Male   | 176 | 66 | 120 | 95 | No  |
| 63 | Female | 145 | 72 | 90  | 98 | Yes |
| 62 | Female | 156 | 73 | 93  | 97 | Yes |
| 42 | Male   | 176 | 70 | 92  | 95 | Yes |
| 52 | Male   | 181 | 72 | 94  | 98 | No  |
| 45 | Male   | 179 | 56 | 99  | 91 | Yes |
| 44 | Male   | 174 | 56 | 100 | 80 | Yes |
| 52 | Male   | 177 | 51 | 124 | 78 | No  |
| 58 | Male   | 170 | 65 | 125 | 87 | Yes |
| 43 | Female | 165 | 65 | 95  | 90 | Yes |
| 53 | Male   | 176 | 62 | 121 | 95 | Yes |
| 52 | Male   | 178 | 69 | 110 | 92 | No  |
| 67 | Male   | 165 | 70 | 92  | 97 | Yes |
| 57 | Male   | 153 | 71 | 111 | 90 | Yes |
| 54 | Female | 153 | 81 | 108 | 97 | No  |
| 49 | Male   | 155 | 83 | 102 | 93 | Yes |
| 45 | Male   | 156 | 83 | 101 | 91 | Yes |
| 62 | Female | 157 | 84 | 101 | 95 | Yes |
| 60 | Male   | 156 | 73 | 142 | 80 | No  |
| 41 | Male   | 157 | 78 | 121 | 85 | Yes |
| 70 | Male   | 158 | 77 | 148 | 88 | Yes |
| 60 | Male   | 159 | 71 | 145 | 86 | No  |
| 42 | Male   | 161 | 77 | 101 | 87 | Yes |
| 54 | Male   | 165 | 75 | 108 | 89 | Yes |

|    |        |     |    |     |    |     |
|----|--------|-----|----|-----|----|-----|
| 53 | Female | 166 | 73 | 132 | 71 | Yes |
| 58 | Male   | 176 | 69 | 112 | 99 | No  |
| 29 | Male   | 171 | 66 | 120 | 80 | Yes |
| 62 | Male   | 172 | 86 | 102 | 78 | Yes |
| 66 | Female | 143 | 81 | 121 | 95 | No  |
| 54 | Female | 147 | 83 | 120 | 88 | Yes |
| 63 | Female | 149 | 69 | 119 | 94 | Yes |
| 57 | Male   | 156 | 76 | 123 | 72 | Yes |
| 62 | Female | 155 | 71 | 98  | 94 | No  |
| 53 | Female | 154 | 71 | 142 | 87 | Yes |
| 61 | Female | 152 | 67 | 130 | 95 | Yes |
| 62 | Male   | 151 | 68 | 132 | 87 | No  |
| 69 | Female | 153 | 66 | 96  | 80 | Yes |
| 55 | Female | 158 | 67 | 120 | 84 | Yes |
| 60 | Female | 179 | 60 | 115 | 71 | Yes |
| 67 | Female | 177 | 66 | 135 | 95 | No  |
| 49 | Female | 181 | 67 | 98  | 78 | Yes |
| 58 | Female | 168 | 64 | 121 | 75 | Yes |
| 54 | Female | 176 | 72 | 131 | 77 | No  |
| 58 | Male   | 167 | 73 | 101 | 99 | Yes |
| 58 | Female | 178 | 59 | 135 | 88 | Yes |
| 65 | Female | 179 | 81 | 148 | 84 | Yes |
| 67 | Male   | 174 | 82 | 145 | 95 | No  |
| 63 | Female | 167 | 85 | 109 | 90 | Yes |
| 48 | Male   | 168 | 66 | 152 | 90 | Yes |
| 58 | Female | 156 | 79 | 108 | 84 | No  |
| 45 | Male   | 159 | 52 | 128 | 88 | Yes |
| 59 | Female | 180 | 55 | 121 | 82 | Yes |
| 54 | Male   | 174 | 56 | 111 | 66 | Yes |
| 64 | Female | 173 | 60 | 105 | 89 | No  |
| 53 | Male   | 156 | 60 | 122 | 78 | Yes |
| 57 | Female | 154 | 61 | 149 | 82 | Yes |
| 56 | Female | 154 | 57 | 110 | 92 | No  |
| 42 | Male   | 157 | 57 | 135 | 79 | Yes |
| 71 | Female | 159 | 58 | 101 | 80 | Yes |
| 48 | Male   | 140 | 70 | 145 | 86 | Yes |
| 49 | Female | 152 | 75 | 147 | 78 | No  |
| 52 | Female | 155 | 79 | 145 | 80 | Yes |
| 62 | Female | 145 | 83 | 145 | 88 | Yes |
| 65 | Female | 146 | 52 | 152 | 75 | Yes |
| 56 | Female | 165 | 65 | 121 | 92 | Yes |
| 37 | Female | 148 | 67 | 111 | 98 | Yes |
| 64 | Male   | 153 | 60 | 109 | 95 | Yes |
| 63 | Female | 154 | 67 | 102 | 90 | Yes |
| 53 | Female | 165 | 80 | 101 | 85 | No  |
| 66 | Female | 177 | 81 | 109 | 88 | Yes |
| 69 | Male   | 179 | 83 | 108 | 89 | No  |

|    |        |     |    |     |    |     |
|----|--------|-----|----|-----|----|-----|
| 66 | Female | 179 | 60 | 121 | 75 | Yes |
| 41 | Male   | 148 | 61 | 118 | 77 | Yes |
| 59 | Female | 165 | 65 | 123 | 90 | Yes |
| 59 | Female | 167 | 59 | 132 | 88 | Yes |
| 56 | Female | 156 | 57 | 134 | 89 | No  |
| 55 | Male   | 155 | 59 | 151 | 92 | Yes |
| 52 | Female | 176 | 55 | 120 | 82 | Yes |
| 45 | Female | 178 | 50 | 134 | 87 | No  |
| 67 | Female | 179 | 53 | 111 | 81 | Yes |
| 45 | Male   | 145 | 54 | 108 | 82 | Yes |
| 51 | Male   | 146 | 59 | 135 | 95 | No  |
| 64 | Female | 165 | 76 | 110 | 98 | Yes |
| 35 | Male   | 155 | 71 | 112 | 97 | No  |
| 53 | Male   | 152 | 68 | 110 | 95 | Yes |
| 41 | Male   | 150 | 79 | 95  | 98 | Yes |
| 61 | Male   | 151 | 85 | 142 | 91 | Yes |
| 54 | Female | 145 | 88 | 98  | 80 | Yes |
| 66 | Male   | 149 | 87 | 132 | 78 | No  |
| 62 | Male   | 145 | 84 | 121 | 87 | Yes |
| 61 | Male   | 148 | 82 | 102 | 90 | Yes |
| 54 | Male   | 152 | 65 | 107 | 95 | No  |
| 58 | Male   | 157 | 68 | 101 | 92 | Yes |
| 54 | Male   | 156 | 76 | 101 | 97 | Yes |
| 63 | Male   | 178 | 87 | 120 | 90 | No  |
| 55 | Female | 177 | 90 | 125 | 97 | Yes |
| 48 | Male   | 179 | 79 | 110 | 93 | No  |
| 51 | Male   | 181 | 78 | 134 | 91 | Yes |
| 44 | Male   | 175 | 79 | 148 | 87 | Yes |
| 43 | Female | 169 | 80 | 110 | 95 | Yes |
| 67 | Male   | 145 | 65 | 95  | 87 | Yes |
| 58 | Male   | 156 | 87 | 142 | 80 | No  |
| 62 | Male   | 176 | 90 | 98  | 84 | Yes |
| 57 | Male   | 181 | 83 | 132 | 71 | Yes |
| 62 | Female | 169 | 76 | 121 | 95 | No  |
| 55 | Female | 174 | 80 | 102 | 78 | Yes |
| 43 | Male   | 178 | 76 | 107 | 75 | Yes |
| 34 | Female | 179 | 68 | 101 | 77 | No  |
| 61 | Male   | 165 | 64 | 101 | 99 | Yes |
| 51 | Female | 176 | 67 | 120 | 88 | No  |
| 42 | Male   | 178 | 63 | 125 | 85 | Yes |
| 57 | Female | 165 | 59 | 110 | 95 | Yes |
| 43 | Female | 153 | 61 | 134 | 71 | Yes |
| 62 | Female | 153 | 76 | 148 | 81 | Yes |
| 59 | Female | 155 | 72 | 141 | 81 | No  |
| 62 | Male   | 156 | 89 | 129 | 75 | Yes |
| 52 | Male   | 157 | 90 | 130 | 78 | Yes |
| 58 | Male   | 156 | 88 | 145 | 68 | No  |

|    |        |     |     |     |    |     |
|----|--------|-----|-----|-----|----|-----|
| 40 | Male   | 157 | 68  | 134 | 81 | Yes |
| 63 | Female | 158 | 76  | 134 | 90 | Yes |
| 60 | Female | 159 | 59  | 128 | 80 | No  |
| 61 | Male   | 161 | 69  | 132 | 69 | Yes |
| 45 | Male   | 165 | 68  | 120 | 88 | No  |
| 50 | Female | 166 | 67  | 120 | 68 | Yes |
| 41 | Male   | 176 | 76  | 101 | 73 | Yes |
| 59 | Male   | 171 | 68  | 142 | 85 | Yes |
| 41 | Female | 172 | 69  | 120 | 88 | Yes |
| 51 | Female | 143 | 64  | 140 | 88 | No  |
| 58 | Female | 147 | 92  | 120 | 78 | Yes |
| 59 | Male   | 149 | 90  | 104 | 85 | Yes |
| 59 | Female | 156 | 89  | 142 | 66 | No  |
| 57 | Female | 155 | 88  | 121 | 87 | Yes |
| 61 | Female | 154 | 79  | 99  | 75 | Yes |
| 56 | Male   | 152 | 94  | 118 | 78 | No  |
| 56 | Male   | 151 | 79  | 120 | 88 | Yes |
| 41 | Male   | 153 | 81  | 148 | 80 | No  |
| 60 | Male   | 158 | 82  | 119 | 87 | Yes |
| 51 | Male   | 169 | 76  | 101 | 84 | Yes |
| 61 | Male   | 177 | 78  | 139 | 90 | Yes |
| 57 | Male   | 178 | 75  | 118 | 82 | Yes |
| 60 | Female | 156 | 73  | 105 | 74 | Yes |
| 59 | Male   | 176 | 83  | 121 | 80 | No  |
| 55 | Male   | 167 | 84  | 149 | 88 | Yes |
| 62 | Male   | 178 | 82  | 114 | 85 | No  |
| 57 | Female | 179 | 76  | 114 | 90 | Yes |
| 43 | Female | 174 | 79  | 101 | 81 | Yes |
| 59 | Male   | 167 | 78  | 145 | 78 | Yes |
| 57 | Male   | 180 | 61  | 135 | 99 | Yes |
| 53 | Female | 156 | 70  | 110 | 88 | No  |
| 45 | Male   | 159 | 67  | 104 | 75 | No  |
| 41 | Female | 180 | 66  | 119 | 91 | Yes |
| 41 | Male   | 174 | 63  | 152 | 85 | No  |
| 57 | Male   | 173 | 58  | 117 | 74 | Yes |
| 37 | Female | 156 | 56  | 145 | 75 | No  |
| 41 | Male   | 154 | 67  | 138 | 88 | Yes |
| 59 | Female | 154 | 58  | 101 | 91 | Yes |
| 50 | Female | 157 | 61  | 117 | 80 | Yes |
| 65 | Female | 159 | 63  | 123 | 78 | Yes |
| 47 | Female | 140 | 67  | 135 | 81 | Yes |
| 46 | Male   | 172 | 85  | 101 | 80 | Yes |
| 69 | Female | 171 | 87  | 123 | 91 | Yes |
| 73 | Female | 164 | 100 | 118 | 90 | No  |
| 75 | Female | 148 | 55  | 132 | 88 | Yes |
| 72 | Female | 178 | 75  | 142 | 65 | Yes |
| 81 | Female | 146 | 68  | 105 | 88 | Yes |

|    |        |     |     |     |    |           |
|----|--------|-----|-----|-----|----|-----------|
| 50 | Female | 148 | 42  | 148 | 78 | No        |
| 75 | Female | 176 | 80  | 118 | 81 | Yes       |
| 35 | Female | 154 | 60  | 101 | 94 | No        |
| 50 | Female | 158 | 78  | 132 | 75 | Yes       |
| 25 | Female | 159 | 68  | 92  | 81 | Not Known |
| 35 | Female | 165 | 66  | 154 | 78 | Yes       |
| 26 | Female | 154 | 75  | 111 | 92 | No        |
| 69 | Male   | 153 | 77  | 108 | 75 | Yes       |
| 75 | Male   | 159 | 58  | 121 | 89 | No        |
| 37 | Male   | 148 | 45  | 102 | 92 | No        |
| 69 | Female | 160 | 85  | 152 | 78 | No        |
| 50 | Female | 166 | 67  | 131 | 90 | No        |
| 37 | Female | 156 | 82  | 148 | 77 | Not Known |
| 50 | Female | 141 | 63  | 140 | 82 | Yes       |
| 50 | Male   | 161 | 80  | 112 | 79 | Yes       |
| 26 | Male   | 176 | 75  | 142 | 80 | Yes       |
| 75 | Female | 159 | 105 | 114 | 71 | Not Known |
| 39 | Female | 178 | 68  | 142 | 90 | Yes       |
| 78 | Female | 156 | 75  | 132 | 65 | Yes       |
| 34 | Male   | 172 | 65  | 110 | 85 | No        |
| 35 | Female | 165 | 68  | 101 | 88 | Yes       |
| 78 | Male   | 178 | 96  | 132 | 69 | Not Known |
| 72 | Female | 149 | 58  | 123 | 78 | Yes       |
| 67 | Male   | 177 | 79  | 129 | 84 | No        |
| 26 | Male   | 153 | 60  | 142 | 88 | Yes       |
| 34 | Male   | 174 | 89  | 131 | 95 | Yes       |
| 34 | Male   | 178 | 72  | 95  | 78 | No        |
| 27 | Male   | 172 | 103 | 142 | 78 | Yes       |
| 38 | Female | 159 | 47  | 138 | 89 | Yes       |
| 27 | Male   | 178 | 105 | 105 | 88 | No        |
| 38 | Male   | 171 | 100 | 122 | 98 | No        |
| 37 | Female | 176 | 62  | 108 | 88 | No        |
| 37 | Male   | 176 | 95  | 144 | 67 | No        |
| 80 | Male   | 172 | 80  | 140 | 68 | Not Known |
| 80 | Female | 159 | 81  | 132 | 81 | Yes       |
| 80 | Female | 145 | 75  | 135 | 92 | No        |
| 23 | Female | 175 | 88  | 97  | 64 | Yes       |
| 34 | Female | 155 | 53  | 147 | 69 | No        |
| 81 | Female | 140 | 45  | 150 | 88 | Yes       |
| 23 | Female | 152 | 75  | 97  | 99 | Yes       |
| 34 | Female | 156 | 62  | 120 | 82 | No        |
| 82 | Male   | 172 | 65  | 149 | 82 | Not Known |
| 24 | Male   | 178 | 80  | 93  | 98 | Not Known |
| 81 | Female | 140 | 65  | 131 | 90 | Not Known |
| 81 | Female | 150 | 59  | 120 | 80 | No        |
| 81 | Female | 158 | 76  | 121 | 95 | Yes       |
| 76 | Female | 178 | 76  | 110 | 99 | Yes       |



|    |        |     |     |     |     |           |
|----|--------|-----|-----|-----|-----|-----------|
| 24 | Female | 172 | 97  | 90  | 99  | No        |
| 82 | Male   | 171 | 70  | 121 | 80  | Yes       |
| 30 | Male   | 172 | 87  | 101 | 88  | Yes       |
| 25 | Female | 166 | 70  | 91  | 95  | No        |
| 25 | Male   | 178 | 98  | 91  | 95  | Yes       |
| 25 | Female | 168 | 71  | 91  | 100 | No        |
| 25 | Male   | 149 | 72  | 95  | 90  | Yes       |
| 25 | Female | 158 | 70  | 97  | 78  | Not Known |
| 25 | Female | 159 | 78  | 92  | 92  | Yes       |
| 25 | Female | 158 | 75  | 123 | 80  | No        |
| 28 | Female | 165 | 69  | 118 | 95  | Yes       |
| 29 | Female | 154 | 72  | 142 | 77  | Not Known |
| 30 | Female | 154 | 58  | 118 | 66  | Not Known |
| 32 | Male   | 181 | 100 | 140 | 80  | Yes       |
| 33 | Male   | 175 | 103 | 125 | 98  | No        |
| 36 | Male   | 152 | 65  | 120 | 70  | No        |
| 79 | Female | 179 | 90  | 142 | 81  | Not Known |
| 79 | Female | 165 | 98  | 145 | 78  | Not Known |
| 23 | Female | 138 | 65  | 90  | 98  | No        |
| 36 | Female | 181 | 103 | 152 | 79  | No        |
| 55 | Female | 160 | 71  | 148 | 75  | No        |
| 56 | Female | 172 | 103 | 142 | 90  | No        |
| 57 | Female | 169 | 86  | 145 | 71  | Yes       |
| 57 | Female | 177 | 80  | 142 | 90  | Yes       |
| 58 | Female | 165 | 77  | 145 | 73  | Yes       |
| 59 | Female | 172 | 91  | 152 | 74  | Yes       |
| 59 | Female | 158 | 66  | 90  | 80  | Yes       |
| 60 | Male   | 165 | 69  | 120 | 95  | Yes       |
| 60 | Female | 167 | 72  | 118 | 88  | Yes       |
| 61 | Male   | 167 | 87  | 118 | 91  | Yes       |
| 61 | Female | 178 | 73  | 112 | 75  | Yes       |
| 62 | Male   | 156 | 48  | 129 | 98  | Yes       |
| 62 | Female | 179 | 92  | 152 | 71  | Yes       |
| 63 | Female | 181 | 98  | 110 | 75  | Yes       |
| 63 | Male   | 154 | 92  | 101 | 77  | Yes       |
| 63 | Male   | 161 | 89  | 125 | 88  | No        |
| 63 | Female | 179 | 86  | 129 | 92  | No        |
| 63 | Male   | 162 | 65  | 132 | 87  | Yes       |
| 63 | Female | 170 | 79  | 138 | 69  | Yes       |
| 63 | Female | 170 | 60  | 152 | 73  | No        |
| 64 | Male   | 163 | 73  | 101 | 80  | No        |
| 64 | Female | 170 | 89  | 133 | 92  | Not Known |
| 64 | Female | 179 | 116 | 144 | 90  | Not Known |
| 64 | Female | 172 | 107 | 139 | 90  | Yes       |
| 65 | Male   | 161 | 78  | 135 | 92  | Yes       |
| 65 | Female | 181 | 78  | 141 | 88  | Yes       |
| 66 | Female | 178 | 85  | 95  | 77  | No        |

|    |        |     |    |     |    |           |
|----|--------|-----|----|-----|----|-----------|
| 67 | Male   | 151 | 74 | 135 | 90 | Yes       |
| 67 | Female | 172 | 75 | 139 | 90 | Yes       |
| 67 | Female | 177 | 97 | 129 | 92 | No        |
| 68 | Female | 174 | 78 | 105 | 79 | Not Known |
| 68 | Female | 167 | 82 | 120 | 77 | Yes       |
| 68 | Male   | 162 | 74 | 142 | 91 | No        |
| 68 | Female | 165 | 77 | 148 | 71 | Not Known |
| 68 | Female | 179 | 95 | 145 | 75 | Yes       |
| 69 | Female | 168 | 82 | 132 | 90 | Not Known |
| 51 | Female | 159 | 51 | 120 | 91 | No        |
| 59 | Female | 152 | 65 | 121 | 78 | Yes       |
| 58 | Female | 146 | 70 | 123 | 88 | No        |
| 58 | Female | 165 | 71 | 98  | 75 | Yes       |
| 65 | Male   | 155 | 69 | 135 | 95 | Yes       |
| 59 | Male   | 176 | 66 | 148 | 71 | Yes       |
| 54 | Male   | 178 | 86 | 145 | 99 | Yes       |
| 65 | Female | 179 | 81 | 109 | 80 | Yes       |
| 41 | Female | 146 | 69 | 108 | 95 | Yes       |
| 64 | Male   | 152 | 89 | 111 | 72 | Yes       |
| 70 | Male   | 151 | 63 | 122 | 87 | Yes       |
| 51 | Female | 145 | 94 | 149 | 78 | Yes       |
| 59 | Male   | 149 | 79 | 110 | 87 | Yes       |
| 64 | Female | 157 | 78 | 147 | 81 | Yes       |
| 60 | Female | 178 | 84 | 121 | 91 | Yes       |
| 51 | Male   | 178 | 82 | 111 | 88 | No        |
| 42 | Male   | 177 | 76 | 109 | 85 | Yes       |
| 41 | Male   | 176 | 69 | 108 | 81 | Yes       |
| 68 | Female | 178 | 67 | 121 | 75 | Yes       |
| 62 | Male   | 169 | 66 | 118 | 78 | Yes       |
| 53 | Male   | 165 | 58 | 132 | 81 | No        |
| 44 | Male   | 168 | 56 | 134 | 90 | Yes       |
| 58 | Female | 165 | 67 | 151 | 80 | Yes       |
| 70 | Male   | 178 | 61 | 134 | 88 | Yes       |
| 43 | Male   | 153 | 78 | 135 | 85 | Yes       |
| 59 | Female | 156 | 92 | 112 | 97 | Yes       |
| 58 | Female | 156 | 55 | 95  | 85 | Yes       |
| 46 | Male   | 159 | 61 | 132 | 75 | Yes       |
| 34 | Male   | 165 | 89 | 102 | 88 | Yes       |
| 59 | Female | 176 | 60 | 101 | 91 | Yes       |
| 67 | Male   | 171 | 66 | 101 | 89 | Yes       |
| 54 | Female | 172 | 64 | 120 | 78 | Yes       |
| 59 | Male   | 147 | 61 | 110 | 81 | Yes       |
| 59 | Male   | 156 | 70 | 148 | 75 | No        |
| 59 | Male   | 155 | 62 | 141 | 95 | Yes       |
| 60 | Male   | 152 | 75 | 130 | 92 | No        |
| 48 | Male   | 153 | 70 | 134 | 88 | No        |
| 53 | Male   | 158 | 67 | 134 | 95 | Yes       |

|    |        |     |    |     |    |     |
|----|--------|-----|----|-----|----|-----|
| 60 | Male   | 178 | 89 | 120 | 78 | Yes |
| 70 | Female | 177 | 90 | 120 | 89 | Yes |
| 70 | Female | 176 | 93 | 101 | 81 | Yes |
| 52 | Female | 167 | 94 | 142 | 84 | No  |
| 62 | Female | 178 | 87 | 120 | 71 | Yes |
| 44 | Male   | 179 | 49 | 140 | 99 | Yes |
| 58 | Female | 174 | 58 | 120 | 80 | No  |
| 63 | Female | 167 | 84 | 104 | 78 | Yes |
| 42 | Female | 168 | 88 | 142 | 87 | Yes |
| 54 | Female | 156 | 94 | 121 | 88 | Yes |
| 52 | Female | 180 | 68 | 118 | 88 | Yes |
| 47 | Male   | 156 | 81 | 119 | 71 | Yes |
| 57 | Female | 154 | 83 | 101 | 92 | No  |
| 51 | Male   | 145 | 54 | 114 | 81 | Yes |
| 64 | Male   | 146 | 58 | 101 | 88 | Yes |
| 65 | Female | 165 | 56 | 145 | 78 | Yes |
| 52 | Female | 148 | 67 | 135 | 81 | Yes |
| 54 | Female | 177 | 73 | 152 | 75 | Yes |
| 29 | Female | 179 | 79 | 139 | 85 | Yes |
| 54 | Female | 176 | 55 | 101 | 88 | Yes |
| 57 | Female | 146 | 63 | 135 | 80 | No  |
| 64 | Female | 155 | 56 | 107 | 89 | No  |
| 44 | Male   | 151 | 61 | 118 | 79 | No  |
| 56 | Male   | 145 | 63 | 132 | 85 | No  |
| 61 | Male   | 149 | 67 | 109 | 74 | No  |
| 50 | Male   | 145 | 78 | 142 | 90 | Yes |
| 43 | Male   | 156 | 55 | 98  | 87 | Yes |
| 63 | Male   | 168 | 61 | 145 | 92 | Yes |
| 64 | Male   | 179 | 89 | 118 | 88 | Yes |
| 50 | Male   | 180 | 89 | 152 | 94 | Yes |
| 60 | Male   | 145 | 60 | 132 | 88 | No  |
| 52 | Male   | 156 | 66 | 152 | 82 | Yes |
| 63 | Male   | 177 | 61 | 151 | 84 | Yes |
| 44 | Female | 170 | 86 | 99  | 88 | Yes |
| 62 | Male   | 172 | 62 | 95  | 94 | Yes |
| 62 | Female | 168 | 58 | 145 | 90 | Yes |
| 48 | Male   | 159 | 54 | 142 | 68 | Yes |
| 61 | Female | 180 | 50 | 138 | 83 | Yes |
| 66 | Male   | 174 | 51 | 105 | 88 | Yes |
| 46 | Female | 154 | 51 | 133 | 80 | No  |
| 51 | Male   | 154 | 65 | 122 | 78 | Yes |
| 52 | Male   | 157 | 67 | 104 | 89 | Yes |
| 58 | Female | 159 | 92 | 120 | 81 | Yes |
| 41 | Male   | 140 | 88 | 108 | 95 | Yes |
| 43 | Female | 152 | 82 | 144 | 71 | Yes |
| 67 | Female | 155 | 81 | 105 | 99 | No  |
| 58 | Male   | 145 | 81 | 124 | 80 | Yes |

|    |        |     |    |     |    |     |
|----|--------|-----|----|-----|----|-----|
| 62 | Female | 146 | 84 | 112 | 78 | Yes |
| 44 | Male   | 165 | 67 | 140 | 95 | Yes |
| 60 | Male   | 148 | 78 | 152 | 88 | Yes |
| 60 | Male   | 153 | 77 | 112 | 94 | No  |
| 57 | Female | 154 | 75 | 114 | 72 | Yes |
| 53 | Male   | 165 | 75 | 118 | 94 | No  |
| 56 | Female | 168 | 67 | 132 | 87 | Yes |
| 62 | Male   | 177 | 65 | 108 | 95 | Yes |
| 61 | Male   | 179 | 80 | 132 | 87 | Yes |
| 62 | Female | 142 | 81 | 132 | 80 | Yes |
| 34 | Female | 165 | 82 | 120 | 84 | Yes |
| 48 | Female | 167 | 69 | 135 | 71 | No  |
| 65 | Female | 156 | 65 | 123 | 95 | Yes |
| 52 | Female | 155 | 62 | 101 | 78 | Yes |
| 56 | Female | 176 | 61 | 141 | 75 | Yes |
| 41 | Male   | 178 | 60 | 139 | 77 | Yes |
| 52 | Male   | 179 | 65 | 132 | 99 | No  |
| 54 | Male   | 145 | 61 | 147 | 88 | Yes |
| 43 | Male   | 146 | 62 | 134 | 85 | No  |
| 41 | Male   | 165 | 59 | 118 | 95 | Yes |
| 63 | Male   | 155 | 58 | 147 | 71 | Yes |
| 60 | Female | 152 | 81 | 120 | 88 | Yes |
| 41 | Male   | 150 | 71 | 120 | 81 | Yes |
| 59 | Male   | 151 | 72 | 114 | 75 | Yes |
| 41 | Female | 145 | 78 | 149 | 71 | No  |
| 57 | Female | 149 | 79 | 138 | 68 | Yes |
| 56 | Female | 145 | 87 | 121 | 81 | Yes |
| 57 | Male   | 148 | 88 | 131 | 90 | Yes |
| 60 | Male   | 152 | 83 | 138 | 80 | Yes |
| 61 | Female | 157 | 45 | 120 | 69 | No  |
| 42 | Female | 156 | 56 | 121 | 88 | Yes |
| 54 | Male   | 178 | 67 | 110 | 68 | No  |
| 49 | Male   | 168 | 71 | 126 | 73 | Yes |
| 54 | Male   | 177 | 71 | 121 | 85 | Yes |
| 69 | Female | 177 | 75 | 114 | 88 | Yes |
| 54 | Male   | 181 | 67 | 129 | 97 | Yes |
| 64 | Female | 177 | 87 | 130 | 78 | Yes |
| 70 | Female | 145 | 69 | 101 | 85 | No  |
| 47 | Male   | 156 | 67 | 105 | 66 | Yes |
| 57 | Female | 176 | 59 | 136 | 87 | Yes |
| 64 | Male   | 177 | 81 | 152 | 75 | Yes |
| 50 | Female | 177 | 65 | 145 | 78 | Yes |
| 40 | Female | 174 | 68 | 100 | 88 | No  |
| 57 | Female | 173 | 61 | 122 | 80 | Yes |
| 37 | Female | 174 | 60 | 102 | 91 | No  |
| 54 | Female | 165 | 59 | 101 | 89 | Yes |
| 49 | Female | 176 | 54 | 145 | 78 | Yes |

|    |        |     |    |     |    |     |
|----|--------|-----|----|-----|----|-----|
| 53 | Female | 178 | 51 | 109 | 82 | Yes |
| 34 | Female | 165 | 55 | 120 | 81 | Yes |
| 51 | Female | 153 | 51 | 125 | 88 | Yes |
| 55 | Male   | 153 | 56 | 142 | 75 | No  |
| 41 | Male   | 155 | 72 | 97  | 95 | Yes |
| 52 | Male   | 156 | 72 | 128 | 74 | Yes |
| 67 | Male   | 157 | 76 | 120 | 92 | Yes |
| 65 | Male   | 156 | 77 | 97  | 83 | Yes |
| 59 | Female | 157 | 65 | 123 | 88 | No  |
| 52 | Male   | 158 | 67 | 100 | 95 | Yes |
| 57 | Male   | 159 | 71 | 127 | 92 | No  |
| 53 | Male   | 161 | 72 | 109 | 80 | Yes |
| 62 | Male   | 165 | 77 | 152 | 78 | Yes |
| 49 | Male   | 166 | 79 | 118 | 89 | Yes |
| 58 | Male   | 176 | 75 | 142 | 81 | Yes |
| 63 | Female | 171 | 56 | 152 | 88 | Yes |
| 46 | Female | 172 | 56 | 145 | 95 | No  |
| 60 | Male   | 143 | 74 | 128 | 92 | Yes |
| 64 | Male   | 147 | 67 | 120 | 80 | Yes |
| 54 | Male   | 149 | 61 | 118 | 78 | Yes |
| 46 | Male   | 156 | 65 | 142 | 89 | Yes |
| 51 | Male   | 155 | 76 | 92  | 81 | No  |
| 57 | Male   | 154 | 49 | 99  | 95 | Yes |
| 58 | Female | 152 | 49 | 98  | 71 | No  |
| 57 | Male   | 151 | 55 | 95  | 99 | Yes |
| 61 | Male   | 153 | 51 | 138 | 80 | Yes |
| 35 | Male   | 158 | 58 | 137 | 78 | Yes |
| 50 | Male   | 177 | 58 | 130 | 95 | Yes |
| 50 | Male   | 168 | 56 | 131 | 88 | Yes |
| 69 | Female | 177 | 71 | 136 | 94 | No  |
| 35 | Female | 177 | 77 | 99  | 72 | Yes |
| 53 | Male   | 176 | 76 | 99  | 94 | Yes |
| 71 | Female | 177 | 69 | 98  | 87 | Yes |
| 49 | Male   | 178 | 66 | 92  | 95 | Yes |
| 39 | Male   | 179 | 72 | 91  | 87 | No  |
| 48 | Male   | 174 | 73 | 120 | 80 | Yes |
| 51 | Male   | 167 | 70 | 123 | 84 | No  |
| 29 | Female | 168 | 60 | 101 | 71 | Yes |
| 39 | Female | 156 | 56 | 104 | 95 | Yes |
| 52 | Female | 159 | 56 | 115 | 78 | Yes |
| 61 | Female | 180 | 51 | 112 | 75 | Yes |
| 67 | Female | 174 | 65 | 102 | 77 | Yes |
| 67 | Female | 173 | 65 | 105 | 99 | No  |
| 49 | Female | 156 | 62 | 108 | 88 | Yes |
| 45 | Male   | 154 | 69 | 107 | 85 | Yes |
| 41 | Male   | 154 | 70 | 106 | 95 | Yes |
| 59 | Male   | 157 | 71 | 109 | 90 | Yes |

|    |        |     |    |     |    |     |
|----|--------|-----|----|-----|----|-----|
| 57 | Male   | 159 | 81 | 111 | 90 | No  |
| 67 | Male   | 140 | 83 | 100 | 84 | Yes |
| 58 | Male   | 152 | 83 | 105 | 88 | No  |
| 34 | Male   | 155 | 84 | 120 | 82 | Yes |
| 57 | Female | 145 | 84 | 132 | 66 | Yes |
| 41 | Female | 146 | 78 | 125 | 89 | Yes |
| 41 | Male   | 165 | 77 | 124 | 78 | Yes |
| 56 | Female | 148 | 71 | 128 | 82 | Yes |
| 56 | Male   | 153 | 77 | 129 | 92 | No  |
| 65 | Female | 154 | 70 | 124 | 79 | Yes |
| 69 | Female | 165 | 73 | 126 | 80 | Yes |
| 53 | Female | 168 | 69 | 121 | 86 | Yes |
| 60 | Male   | 169 | 66 | 122 | 64 | Yes |
| 64 | Male   | 179 | 86 | 132 | 80 | No  |
| 61 | Male   | 149 | 81 | 130 | 88 | Yes |
| 58 | Male   | 165 | 83 | 131 | 90 | No  |
| 60 | Male   | 167 | 69 | 123 | 92 | Yes |
| 59 | Male   | 156 | 65 | 125 | 98 | Yes |
| 52 | Male   | 155 | 71 | 128 | 95 | Yes |
| 42 | Male   | 176 | 71 | 124 | 90 | Yes |
| 56 | Female | 178 | 67 | 129 | 85 | Yes |
| 41 | Female | 179 | 68 | 126 | 88 | No  |
| 60 | Male   | 145 | 66 | 110 | 89 | Yes |
| 67 | Male   | 146 | 67 | 100 | 75 | Yes |
| 65 | Female | 165 | 60 | 102 | 77 | Yes |
| 61 | Female | 155 | 66 | 103 | 90 | Yes |
| 55 | Male   | 152 | 67 | 105 | 88 | No  |
| 62 | Female | 150 | 64 | 108 | 89 | Yes |
| 64 | Male   | 151 | 72 | 107 | 92 | No  |
| 59 | Male   | 145 | 73 | 106 | 82 | Yes |
| 64 | Male   | 149 | 59 | 104 | 87 | Yes |
| 58 | Male   | 145 | 81 | 109 | 81 | Yes |
| 57 | Female | 148 | 82 | 103 | 82 | Yes |
| 52 | Female | 152 | 85 | 102 | 95 | Yes |
| 45 | Male   | 157 | 66 | 108 | 98 | No  |
| 44 | Female | 156 | 58 | 120 | 97 | Yes |
| 58 | Female | 178 | 51 | 111 | 95 | Yes |
| 59 | Female | 168 | 55 | 102 | 98 | Yes |
| 50 | Male   | 169 | 52 | 121 | 91 | Yes |
| 44 | Male   | 177 | 51 | 122 | 80 | No  |
| 66 | Male   | 179 | 65 | 135 | 78 | Yes |
| 66 | Male   | 177 | 67 | 145 | 87 | No  |
| 59 | Male   | 145 | 92 | 152 | 90 | Yes |
| 45 | Female | 156 | 88 | 135 | 95 | Yes |
| 64 | Female | 176 | 82 | 137 | 92 | Yes |
| 44 | Female | 177 | 81 | 138 | 97 | Yes |
| 55 | Male   | 177 | 81 | 129 | 90 | Yes |

|    |        |     |    |     |    |     |
|----|--------|-----|----|-----|----|-----|
| 50 | Female | 174 | 84 | 90  | 97 | No  |
| 58 | Female | 175 | 67 | 99  | 93 | Yes |
| 39 | Female | 176 | 78 | 98  | 91 | Yes |
| 45 | Male   | 165 | 77 | 97  | 95 | Yes |
| 52 | Male   | 176 | 75 | 90  | 80 | Yes |
| 41 | Male   | 178 | 75 | 95  | 85 | No  |
| 66 | Male   | 165 | 67 | 96  | 88 | Yes |
| 69 | Male   | 153 | 65 | 99  | 86 | No  |
| 40 | Male   | 153 | 80 | 97  | 87 | Yes |
| 49 | Female | 155 | 81 | 93  | 89 | Yes |
| 62 | Female | 156 | 82 | 92  | 71 | Yes |
| 60 | Male   | 157 | 69 | 100 | 99 | Yes |
| 61 | Female | 156 | 65 | 110 | 80 | Yes |
| 56 | Female | 157 | 62 | 102 | 78 | No  |
| 57 | Male   | 158 | 61 | 104 | 95 | Yes |
| 68 | Male   | 159 | 60 | 106 | 88 | Yes |
| 55 | Male   | 161 | 65 | 120 | 94 | Yes |
| 44 | Male   | 165 | 61 | 121 | 72 | Yes |
| 29 | Male   | 166 | 62 | 135 | 94 | No  |
| 63 | Male   | 176 | 59 | 142 | 87 | Yes |
| 40 | Male   | 171 | 58 | 152 | 95 | Yes |
| 64 | Female | 172 | 81 | 150 | 87 | Yes |
| 58 | Female | 143 | 71 | 142 | 80 | Yes |
| 55 | Male   | 147 | 72 | 124 | 84 | Yes |
| 59 | Male   | 149 | 59 | 132 | 71 | Yes |
| 59 | Male   | 156 | 56 | 134 | 95 | Yes |
| 50 | Male   | 155 | 87 | 129 | 78 | No  |
| 67 | Male   | 154 | 88 | 127 | 75 | Yes |
| 64 | Male   | 152 | 83 | 125 | 77 | Yes |
| 61 | Male   | 151 | 45 | 102 | 99 | Yes |
| 60 | Male   | 153 | 56 | 105 | 88 | Yes |
| 69 | Male   | 158 | 67 | 123 | 85 | No  |
| 57 | Female | 177 | 71 | 149 | 76 | Yes |
| 64 | Male   | 168 | 71 | 138 | 90 | No  |
| 54 | Female | 177 | 75 | 121 | 90 | Yes |
| 57 | Male   | 177 | 67 | 131 | 84 | Yes |
| 58 | Female | 176 | 87 | 138 | 88 | Yes |
| 55 | Male   | 177 | 69 | 120 | 82 | Yes |
| 45 | Female | 178 | 67 | 121 | 66 | Yes |
| 52 | Male   | 179 | 59 | 110 | 89 | No  |
| 51 | Female | 174 | 81 | 126 | 78 | Yes |
| 67 | Female | 167 | 65 | 121 | 82 | Yes |
| 51 | Female | 168 | 68 | 114 | 92 | Yes |
| 50 | Female | 156 | 61 | 129 | 79 | Yes |
| 63 | Female | 159 | 60 | 130 | 80 | No  |
| 57 | Male   | 180 | 59 | 101 | 86 | Yes |
| 44 | Male   | 174 | 54 | 105 | 69 | No  |

|    |        |     |     |     |    |     |
|----|--------|-----|-----|-----|----|-----|
| 54 | Female | 173 | 51  | 98  | 80 | Yes |
| 41 | Male   | 156 | 55  | 152 | 88 | Yes |
| 40 | Male   | 154 | 51  | 145 | 90 | Yes |
| 61 | Female | 154 | 56  | 100 | 92 | Yes |
| 57 | Female | 157 | 46  | 122 | 98 | Yes |
| 51 | Male   | 159 | 70  | 102 | 95 | No  |
| 55 | Female | 140 | 76  | 101 | 90 | Yes |
| 47 | Male   | 152 | 77  | 145 | 85 | Yes |
| 53 | Female | 155 | 65  | 109 | 88 | Yes |
| 63 | Female | 145 | 67  | 120 | 89 | Yes |
| 59 | Female | 146 | 71  | 125 | 75 | No  |
| 56 | Male   | 165 | 72  | 142 | 77 | Yes |
| 55 | Female | 148 | 77  | 97  | 90 | No  |
| 51 | Female | 153 | 79  | 128 | 88 | Yes |
| 57 | Male   | 154 | 75  | 120 | 89 | Yes |
| 64 | Male   | 165 | 56  | 97  | 92 | Yes |
| 34 | Male   | 168 | 56  | 123 | 82 | Yes |
| 46 | Female | 169 | 74  | 100 | 87 | Yes |
| 77 | Female | 179 | 67  | 127 | 81 | No  |
| 53 | Female | 148 | 61  | 109 | 82 | Yes |
| 55 | Female | 165 | 65  | 152 | 80 | Yes |
| 58 | Female | 167 | 76  | 118 | 98 | Yes |
| 57 | Female | 156 | 49  | 142 | 90 | Yes |
| 59 | Female | 155 | 49  | 99  | 95 | No  |
| 42 | Female | 176 | 55  | 98  | 98 | Yes |
| 47 | Female | 178 | 51  | 102 | 91 | No  |
| 56 | Male   | 179 | 58  | 101 | 80 | Yes |
| 66 | Female | 145 | 58  | 100 | 78 | Yes |
| 51 | Female | 146 | 56  | 115 | 87 | Yes |
| 57 | Male   | 165 | 71  | 114 | 90 | Yes |
| 64 | Male   | 155 | 77  | 120 | 95 | Yes |
| 65 | Female | 152 | 76  | 123 | 92 | No  |
| 54 | Female | 150 | 69  | 132 | 97 | Yes |
| 53 | Female | 151 | 66  | 111 | 90 | Yes |
| 66 | Female | 145 | 72  | 120 | 97 | Yes |
| 47 | Female | 149 | 73  | 154 | 88 | Yes |
| 52 | Male   | 145 | 110 | 142 | 91 | Yes |
| 64 | Male   | 148 | 82  | 123 | 87 | Yes |
| 57 | Female | 152 | 56  | 132 | 95 | No  |
| 49 | Male   | 157 | 56  | 128 | 87 | Yes |
| 61 | Female | 156 | 51  | 99  | 80 | Yes |
| 57 | Male   | 178 | 65  | 135 | 84 | Yes |
| 63 | Male   | 168 | 65  | 124 | 71 | Yes |
| 40 | Male   | 169 | 62  | 120 | 95 | Yes |
| 37 | Male   | 177 | 69  | 125 | 78 | No  |
| 48 | Male   | 174 | 70  | 132 | 75 | Yes |
| 60 | Male   | 177 | 71  | 125 | 77 | Yes |



|    |        |     |    |     |    |     |
|----|--------|-----|----|-----|----|-----|
| 66 | Male   | 145 | 81 | 128 | 70 | Yes |
| 56 | Male   | 156 | 83 | 99  | 88 | Yes |
| 44 | Male   | 176 | 83 | 98  | 85 | No  |
| 38 | Male   | 177 | 84 | 150 | 95 | Yes |
| 51 | Male   | 177 | 70 | 99  | 71 | No  |
| 64 | Male   | 174 | 78 | 102 | 88 | Yes |
| 45 | Male   | 178 | 77 | 108 | 81 | Yes |
| 57 | Male   | 177 | 71 | 132 | 75 | Yes |
| 58 | Male   | 165 | 77 | 142 | 78 | Yes |
| 71 | Male   | 176 | 68 | 145 | 68 | Yes |
| 66 | Male   | 178 | 73 | 152 | 81 | Yes |
| 61 | Male   | 165 | 69 | 108 | 90 | Yes |
| 65 | Male   | 153 | 66 | 110 | 80 | No  |
| 39 | Male   | 153 | 86 | 90  | 69 | Yes |
| 51 | Male   | 155 | 81 | 110 | 88 | No  |
| 41 | Male   | 156 | 83 | 110 | 68 | No  |
| 64 | Male   | 157 | 69 | 106 | 73 | Yes |
| 45 | Male   | 156 | 80 | 110 | 85 | No  |
| 58 | Male   | 157 | 52 | 114 | 88 | Yes |
| 35 | Female | 158 | 55 | 109 | 97 | No  |
| 57 | Male   | 159 | 56 | 115 | 78 | Yes |
| 49 | Male   | 161 | 60 | 95  | 85 | Yes |
| 51 | Male   | 165 | 60 | 105 | 66 | No  |
| 60 | Male   | 166 | 61 | 119 | 87 | Yes |
| 39 | Male   | 176 | 57 | 98  | 75 | No  |
| 56 | Male   | 171 | 57 | 104 | 78 | Yes |
| 44 | Male   | 172 | 58 | 117 | 88 | Yes |
| 57 | Female | 143 | 70 | 120 | 80 | Yes |
| 41 | Female | 147 | 75 | 115 | 87 | Yes |
| 54 | Male   | 149 | 79 | 121 | 84 | Yes |
| 44 | Male   | 156 | 83 | 120 | 90 | Yes |
| 50 | Female | 155 | 52 | 123 | 82 | No  |
| 53 | Male   | 154 | 65 | 123 | 74 | Yes |
| 61 | Female | 152 | 67 | 123 | 80 | No  |
| 59 | Male   | 151 | 60 | 122 | 88 | Yes |
| 58 | Male   | 153 | 67 | 124 | 85 | Yes |
| 42 | Female | 158 | 80 | 120 | 90 | No  |
| 64 | Male   | 166 | 81 | 120 | 81 | Yes |
| 60 | Male   | 168 | 83 | 120 | 78 | No  |
| 70 | Male   | 177 | 60 | 124 | 99 | Yes |
| 41 | Male   | 177 | 61 | 123 | 88 | Yes |
| 61 | Female | 176 | 65 | 124 | 75 | Yes |
| 51 | Male   | 177 | 59 | 124 | 91 | Yes |
| 58 | Male   | 178 | 57 | 125 | 85 | No  |
| 63 | Male   | 179 | 59 | 125 | 74 | Yes |
| 52 | Male   | 174 | 55 | 120 | 75 | Yes |
| 63 | Female | 167 | 50 | 125 | 88 | Yes |

|    |        |     |    |     |    |     |
|----|--------|-----|----|-----|----|-----|
| 42 | Male   | 168 | 53 | 126 | 91 | Yes |
| 47 | Male   | 156 | 54 | 126 | 80 | Yes |
| 74 | Female | 159 | 59 | 121 | 78 | Yes |
| 60 | Female | 180 | 76 | 127 | 81 | No  |
| 56 | Female | 174 | 71 | 120 | 80 | Yes |
| 56 | Female | 173 | 68 | 127 | 69 | No  |
| 70 | Male   | 156 | 79 | 127 | 91 | Yes |
| 60 | Female | 154 | 85 | 127 | 88 | Yes |
| 52 | Male   | 154 | 88 | 128 | 90 | No  |
| 41 | Male   | 157 | 87 | 128 | 88 | Yes |
| 59 | Male   | 159 | 84 | 128 | 81 | No  |
| 60 | Female | 140 | 82 | 128 | 65 | Yes |
| 54 | Male   | 152 | 65 | 129 | 68 | Yes |
| 58 | Male   | 155 | 68 | 129 | 88 | Yes |
| 66 | Female | 145 | 76 | 130 | 88 | Yes |
| 49 | Female | 146 | 87 | 142 | 82 | No  |
| 34 | Female | 165 | 90 | 130 | 71 | Yes |
| 41 | Female | 148 | 79 | 130 | 92 | Yes |
| 60 | Female | 153 | 78 | 130 | 84 | Yes |
| 63 | Male   | 154 | 79 | 130 | 81 | Yes |
| 47 | Male   | 165 | 78 | 133 | 88 | Yes |
| 71 | Female | 168 | 74 | 130 | 94 | Yes |
| 44 | Male   | 169 | 87 | 132 | 75 | No  |
| 55 | Female | 179 | 90 | 131 | 73 | Yes |
| 59 | Male   | 140 | 83 | 132 | 81 | No  |
| 64 | Male   | 165 | 76 | 131 | 88 | Yes |
| 52 | Male   | 167 | 80 | 131 | 78 | Yes |
| 64 | Male   | 156 | 76 | 132 | 81 | No  |
| 50 | Male   | 155 | 68 | 132 | 85 | Yes |
| 56 | Male   | 176 | 64 | 132 | 71 | No  |
| 41 | Male   | 178 | 67 | 133 | 92 | Yes |
| 66 | Female | 179 | 63 | 133 | 75 | Yes |
| 54 | Female | 145 | 59 | 133 | 89 | Yes |
| 56 | Male   | 146 | 61 | 133 | 92 | Yes |
| 71 | Female | 165 | 76 | 133 | 66 | No  |
| 59 | Male   | 155 | 72 | 134 | 77 | Yes |
| 52 | Female | 152 | 89 | 134 | 90 | Yes |
| 54 | Female | 150 | 90 | 134 | 90 | Yes |
| 51 | Female | 151 | 88 | 135 | 84 | Yes |
| 50 | Female | 145 | 68 | 135 | 88 | Yes |
| 49 | Male   | 149 | 76 | 135 | 82 | Yes |
| 74 | Male   | 145 | 59 | 142 | 66 | No  |
| 70 | Male   | 148 | 75 | 152 | 89 | Yes |
| 70 | Female | 152 | 76 | 100 | 78 | No  |
| 67 | Male   | 157 | 67 | 101 | 82 | Yes |
| 57 | Male   | 156 | 76 | 105 | 92 | Yes |
| 55 | Female | 178 | 68 | 105 | 79 | No  |

|    |        |     |    |     |    |     |
|----|--------|-----|----|-----|----|-----|
| 65 | Male   | 168 | 69 | 105 | 80 | Yes |
| 58 | Male   | 169 | 64 | 101 | 86 | No  |
| 44 | Male   | 180 | 92 | 108 | 77 | Yes |
| 62 | Male   | 172 | 90 | 104 | 71 | Yes |
| 46 | Male   | 177 | 89 | 108 | 90 | Yes |
| 60 | Female | 145 | 88 | 110 | 95 | Yes |
| 55 | Male   | 156 | 79 | 90  | 65 | No  |
| 65 | Female | 176 | 94 | 110 | 80 | Yes |
| 60 | Female | 180 | 79 | 110 | 85 | Yes |
| 51 | Female | 166 | 81 | 106 | 85 | Yes |
| 51 | Female | 174 | 82 | 110 | 75 | Yes |
| 65 | Male   | 179 | 76 | 114 | 76 | Yes |
| 60 | Female | 156 | 78 | 109 | 88 | Yes |
| 44 | Male   | 165 | 75 | 115 | 77 | No  |
| 45 | Female | 176 | 73 | 95  | 68 | Yes |
| 56 | Female | 178 | 83 | 105 | 69 | No  |
| 64 | Female | 165 | 84 | 119 | 72 | Yes |
| 55 | Female | 153 | 82 | 98  | 78 | Yes |
| 39 | Female | 153 | 76 | 104 | 84 | No  |
| 52 | Female | 155 | 79 | 117 | 78 | Yes |
| 42 | Male   | 156 | 78 | 120 | 88 | No  |
| 63 | Female | 157 | 77 | 115 | 95 | Yes |
| 35 | Female | 156 | 70 | 121 | 78 | Yes |
| 35 | Male   | 157 | 67 | 120 | 78 | Yes |
| 52 | Female | 158 | 66 | 123 | 78 | Yes |
| 67 | Male   | 159 | 63 | 123 | 89 | No  |
| 49 | Female | 161 | 58 | 123 | 88 | Yes |
| 45 | Female | 165 | 56 | 122 | 66 | Yes |
| 61 | Female | 166 | 67 | 124 | 80 | Yes |
| 70 | Male   | 176 | 58 | 120 | 80 | Yes |
| 42 | Female | 171 | 61 | 120 | 98 | Yes |
| 52 | Female | 172 | 63 | 120 | 80 | Yes |
| 78 | Female | 143 | 67 | 124 | 90 | No  |
| 63 | Female | 147 | 78 | 123 | 88 | Yes |
| 39 | Female | 149 | 79 | 124 | 67 | No  |
| 42 | Female | 156 | 92 | 124 | 98 | Yes |
| 60 | Female | 155 | 54 | 125 | 80 | Yes |
| 47 | Female | 154 | 55 | 125 | 71 | No  |
| 62 | Male   | 152 | 59 | 120 | 68 | Yes |
| 54 | Female | 151 | 61 | 125 | 95 | No  |
| 61 | Female | 153 | 61 | 126 | 95 | Yes |
| 53 | Male   | 158 | 89 | 126 | 78 | Yes |
| 58 | Male   | 166 | 89 | 121 | 74 | Yes |
| 58 | Male   | 169 | 90 | 127 | 66 | Yes |
| 50 | Male   | 180 | 60 | 120 | 84 | No  |
| 53 | Male   | 177 | 66 | 127 | 81 | Yes |
| 41 | Male   | 176 | 64 | 127 | 71 | Yes |

|    |        |     |    |     |    |     |
|----|--------|-----|----|-----|----|-----|
| 45 | Male   | 177 | 67 | 127 | 84 | Yes |
| 64 | Male   | 165 | 61 | 128 | 92 | Yes |
| 63 | Male   | 179 | 62 | 128 | 80 | Yes |
| 67 | Female | 174 | 72 | 128 | 88 | Yes |
| 74 | Male   | 167 | 62 | 128 | 92 | No  |
| 66 | Male   | 168 | 68 | 129 | 76 | Yes |
| 59 | Male   | 156 | 75 | 129 | 86 | No  |
| 45 | Male   | 168 | 72 | 130 | 69 | Yes |
| 51 | Male   | 180 | 70 | 142 | 93 | Yes |
| 50 | Male   | 174 | 67 | 130 | 90 | No  |
| 65 | Male   | 173 | 66 | 130 | 74 | Yes |
| 53 | Female | 156 | 79 | 130 | 84 | No  |
| 60 | Male   | 154 | 89 | 130 | 82 | Yes |
| 54 | Male   | 154 | 90 | 133 | 90 | Yes |
| 43 | Male   | 157 | 93 | 130 | 82 | Yes |
| 59 | Male   | 159 | 94 | 132 | 95 | Yes |
| 77 | Female | 169 | 87 | 131 | 98 | No  |
| 45 | Female | 176 | 49 | 132 | 90 | Yes |
| 42 | Male   | 168 | 58 | 131 | 98 | Yes |
| 59 | Male   | 176 | 84 | 131 | 80 | Yes |
| 70 | Female | 178 | 88 | 132 | 95 | Yes |
| 50 | Male   | 165 | 94 | 132 | 99 | Yes |
| 45 | Female | 153 | 91 | 132 | 80 | Yes |
| 62 | Male   | 153 | 68 | 133 | 80 | No  |
| 62 | Female | 155 | 88 | 133 | 83 | No  |
| 46 | Male   | 156 | 69 | 133 | 78 | No  |
| 62 | Female | 157 | 81 | 133 | 86 | Yes |
| 56 | Male   | 156 | 83 | 133 | 88 | Yes |
| 56 | Male   | 157 | 85 | 134 | 88 | No  |
| 58 | Male   | 158 | 76 | 134 | 88 | Yes |
| 55 | Female | 159 | 71 | 134 | 70 | No  |
| 63 | Male   | 161 | 72 | 135 | 74 | Yes |
| 62 | Male   | 165 | 77 | 135 | 92 | Yes |
| 60 | Male   | 166 | 66 | 135 | 87 | Yes |
| 51 | Male   | 176 | 54 | 136 | 87 | Yes |
| 57 | Male   | 171 | 58 | 136 | 66 | No  |
| 39 | Female | 172 | 56 | 137 | 66 | Yes |
| 59 | Male   | 143 | 67 | 137 | 80 | Yes |
| 42 | Female | 147 | 65 | 137 | 80 | Yes |
| 39 | Female | 149 | 68 | 137 | 92 | Yes |
| 46 | Female | 156 | 69 | 137 | 82 | Yes |
| 67 | Female | 155 | 73 | 137 | 78 | Yes |
| 60 | Male   | 154 | 77 | 137 | 70 | No  |
| 67 | Male   | 152 | 79 | 138 | 90 | Yes |
| 67 | Male   | 151 | 61 | 138 | 77 | No  |
| 77 | Female | 153 | 55 | 138 | 80 | Yes |
| 58 | Female | 158 | 54 | 138 | 80 | Yes |

|    |        |     |    |     |    |     |
|----|--------|-----|----|-----|----|-----|
| 71 | Female | 166 | 50 | 139 | 91 | Yes |
| 48 | Male   | 169 | 51 | 140 | 81 | Yes |
| 52 | Female | 180 | 55 | 140 | 66 | No  |
| 35 | Male   | 177 | 52 | 144 | 95 | Yes |
| 70 | Female | 176 | 51 | 140 | 77 | Yes |
| 77 | Female | 177 | 65 | 142 | 87 | Yes |
| 39 | Female | 178 | 67 | 142 | 82 | Yes |
| 62 | Female | 179 | 92 | 142 | 90 | Yes |
| 62 | Male   | 174 | 88 | 144 | 88 | Yes |
| 56 | Female | 167 | 82 | 144 | 66 | Yes |
| 63 | Female | 168 | 81 | 144 | 89 | Yes |
| 54 | Female | 156 | 81 | 145 | 78 | Yes |
| 59 | Male   | 159 | 84 | 145 | 88 | Yes |
| 60 | Female | 180 | 67 | 140 | 90 | Yes |
| 59 | Male   | 174 | 78 | 152 | 80 | No  |
| 69 | Male   | 173 | 77 | 147 | 98 | Yes |
| 41 | Male   | 156 | 75 | 147 | 91 | No  |
| 45 | Female | 154 | 75 | 140 | 68 | Yes |
| 55 | Male   | 154 | 67 | 152 | 90 | Yes |
| 51 | Female | 157 | 65 | 152 | 77 | No  |
| 64 | Female | 159 | 80 | 145 | 75 | Yes |
| 59 | Male   | 140 | 81 | 152 | 85 | No  |
| 35 | Female | 152 | 82 | 150 | 69 | Yes |
| 62 | Female | 155 | 69 | 90  | 75 | Yes |
| 43 | Male   | 145 | 65 | 99  | 81 | Yes |
| 59 | Male   | 146 | 62 | 95  | 80 | Yes |
| 57 | Male   | 165 | 61 | 91  | 77 | No  |
| 52 | Male   | 148 | 60 | 96  | 92 | Yes |
| 50 | Male   | 153 | 65 | 97  | 82 | Yes |
| 57 | Male   | 154 | 61 | 93  | 78 | Yes |
| 43 | Male   | 165 | 62 | 102 | 82 | Yes |
| 44 | Male   | 169 | 59 | 104 | 86 | Yes |
| 62 | Male   | 169 | 58 | 105 | 94 | Yes |
| 60 | Female | 179 | 81 | 120 | 92 | No  |
| 52 | Male   | 144 | 71 | 110 | 72 | Yes |
| 52 | Male   | 165 | 72 | 111 | 79 | No  |
| 52 | Male   | 167 | 69 | 110 | 83 | Yes |
| 41 | Male   | 156 | 56 | 103 | 88 | Yes |
| 34 | Male   | 155 | 87 | 106 | 66 | No  |
| 42 | Female | 176 | 88 | 101 | 86 | Yes |
| 51 | Female | 178 | 83 | 105 | 85 | No  |
| 42 | Female | 179 | 45 | 109 | 79 | Yes |
| 43 | Female | 145 | 56 | 111 | 72 | Yes |
| 37 | Female | 146 | 67 | 121 | 77 | Yes |
| 63 | Female | 165 | 71 | 122 | 78 | Yes |
| 44 | Female | 155 | 71 | 108 | 80 | No  |
| 47 | Male   | 152 | 75 | 110 | 87 | Yes |

|    |        |     |    |     |    |     |
|----|--------|-----|----|-----|----|-----|
| 63 | Male   | 150 | 67 | 112 | 89 | Yes |
| 38 | Male   | 151 | 87 | 148 | 90 | Yes |
| 52 | Male   | 145 | 69 | 132 | 76 | Yes |
| 65 | Female | 149 | 67 | 119 | 79 | Yes |
| 52 | Male   | 145 | 59 | 130 | 85 | Yes |
| 50 | Female | 148 | 81 | 128 | 74 | No  |
| 54 | Male   | 152 | 65 | 127 | 90 | Yes |
| 49 | Male   | 157 | 68 | 124 | 88 | No  |
| 39 | Female | 156 | 61 | 125 | 95 | Yes |
| 58 | Female | 178 | 60 | 120 | 99 | Yes |
| 61 | Female | 169 | 59 | 121 | 87 | No  |
| 62 | Female | 169 | 54 | 105 | 78 | Yes |
| 62 | Female | 180 | 51 | 109 | 92 | No  |
| 55 | Female | 176 | 55 | 112 | 65 | Yes |
| 41 | Female | 177 | 51 | 128 | 85 | Yes |
| 54 | Female | 145 | 56 | 109 | 81 | Yes |
| 43 | Female | 156 | 58 | 132 | 95 | Yes |
| 42 | Male   | 176 | 59 | 130 | 92 | No  |
| 47 | Female | 180 | 76 | 138 | 88 | Yes |
| 35 | Male   | 166 | 77 | 137 | 80 | Yes |
| 44 | Female | 174 | 65 | 139 | 66 | Yes |
| 48 | Male   | 175 | 67 | 138 | 69 | Yes |
| 47 | Male   | 174 | 71 | 145 | 92 | Yes |
| 49 | Female | 165 | 72 | 152 | 75 | Yes |
| 53 | Female | 176 | 77 | 106 | 95 | No  |
| 70 | Male   | 178 | 79 | 111 | 67 | Yes |
| 46 | Female | 179 | 75 | 123 | 66 | No  |
| 62 | Female | 145 | 65 | 148 | 68 | Yes |
| 53 | Male   | 146 | 67 | 118 | 78 | Yes |
| 59 | Male   | 165 | 92 | 132 | 82 | No  |
| 71 | Female | 155 | 88 | 109 | 92 | Yes |
| 49 | Male   | 152 | 82 | 142 | 79 | No  |
| 43 | Male   | 150 | 81 | 142 | 80 | Yes |
| 46 | Female | 151 | 81 | 104 | 86 | Yes |
| 41 | Male   | 145 | 84 | 105 | 86 | Yes |
| 57 | Male   | 149 | 67 | 98  | 71 | Yes |
| 66 | Male   | 145 | 78 | 121 | 90 | Yes |
| 55 | Male   | 148 | 76 | 145 | 95 | Yes |
| 43 | Male   | 152 | 75 | 134 | 65 | No  |
| 54 | Male   | 157 | 75 | 118 | 80 | Yes |
| 53 | Female | 156 | 67 | 152 | 85 | Yes |
| 57 | Female | 178 | 65 | 101 | 85 | No  |
| 35 | Female | 166 | 80 | 132 | 75 | Yes |
| 57 | Female | 178 | 81 | 152 | 76 | No  |
| 42 | Male   | 178 | 82 | 100 | 88 | Yes |
| 35 | Male   | 173 | 69 | 120 | 77 | Yes |
| 56 | Female | 177 | 65 | 151 | 68 | Yes |

|    |        |     |    |     |    |     |
|----|--------|-----|----|-----|----|-----|
| 39 | Male   | 145 | 62 | 121 | 69 | Yes |
| 35 | Male   | 156 | 61 | 99  | 81 | Yes |
| 45 | Male   | 176 | 60 | 95  | 83 | Yes |
| 57 | Male   | 178 | 65 | 111 | 88 | No  |
| 43 | Female | 169 | 61 | 108 | 95 | Yes |
| 47 | Female | 174 | 62 | 121 | 92 | Yes |
| 52 | Female | 178 | 59 | 102 | 80 | No  |
| 58 | Male   | 172 | 58 | 152 | 78 | Yes |
| 51 | Male   | 165 | 81 | 121 | 89 | No  |
| 39 | Male   | 176 | 71 | 142 | 81 | Yes |
| 29 | Male   | 178 | 72 | 131 | 95 | Yes |
| 67 | Female | 165 | 78 | 148 | 71 | Yes |
| 68 | Male   | 153 | 79 | 130 | 85 | Yes |
| 44 | Male   | 153 | 87 | 129 | 80 | Yes |
| 57 | Male   | 155 | 88 | 108 | 78 | Yes |
| 63 | Male   | 156 | 83 | 135 | 95 | No  |
| 60 | Male   | 157 | 45 | 120 | 88 | Yes |
| 56 | Female | 156 | 56 | 140 | 84 | Yes |
| 62 | Female | 157 | 67 | 150 | 72 | No  |
| 60 | Female | 158 | 71 | 112 | 94 | Yes |
| 45 | Female | 159 | 71 | 142 | 87 | No  |
| 52 | Male   | 161 | 75 | 138 | 95 | Yes |
| 59 | Male   | 165 | 67 | 114 | 87 | Yes |
| 44 | Male   | 166 | 87 | 131 | 80 | Yes |
| 58 | Male   | 176 | 69 | 142 | 84 | Yes |
| 60 | Male   | 171 | 67 | 151 | 71 | Yes |
| 57 | Female | 172 | 59 | 132 | 95 | Yes |
| 56 | Male   | 143 | 81 | 138 | 78 | No  |
| 70 | Male   | 147 | 65 | 101 | 75 | Yes |
| 57 | Male   | 149 | 68 | 110 | 77 | Yes |
| 59 | Male   | 156 | 61 | 108 | 99 | No  |
| 59 | Male   | 155 | 60 | 104 | 88 | Yes |
| 51 | Male   | 154 | 59 | 101 | 85 | No  |
| 52 | Male   | 152 | 54 | 145 | 95 | Yes |
| 51 | Female | 151 | 51 | 110 | 71 | Yes |
| 57 | Female | 153 | 55 | 132 | 88 | Yes |
| 46 | Male   | 158 | 51 | 132 | 81 | Yes |
| 38 | Male   | 169 | 56 | 123 | 75 | Yes |
| 43 | Female | 166 | 78 | 129 | 78 | Yes |
| 70 | Female | 178 | 66 | 118 | 68 | No  |
| 44 | Female | 177 | 76 | 142 | 81 | Yes |
| 68 | Female | 176 | 77 | 131 | 90 | Yes |
| 54 | Male   | 167 | 65 | 95  | 80 | No  |
| 61 | Male   | 178 | 67 | 131 | 69 | Yes |
| 60 | Male   | 179 | 71 | 142 | 88 | No  |
| 41 | Male   | 174 | 72 | 138 | 68 | Yes |
| 41 | Male   | 167 | 77 | 105 | 73 | Yes |

|    |        |     |    |     |    |     |
|----|--------|-----|----|-----|----|-----|
| 62 | Female | 168 | 79 | 102 | 85 | Yes |
| 70 | Female | 156 | 75 | 128 | 88 | Yes |
| 41 | Female | 159 | 56 | 130 | 97 | Yes |
| 49 | Female | 180 | 56 | 122 | 78 | Yes |
| 62 | Female | 174 | 74 | 104 | 85 | No  |
| 44 | Male   | 173 | 67 | 120 | 66 | Yes |
| 44 | Male   | 156 | 61 | 108 | 87 | Yes |
| 51 | Female | 154 | 65 | 144 | 75 | No  |
| 59 | Male   | 154 | 76 | 105 | 78 | Yes |
| 61 | Male   | 157 | 49 | 124 | 88 | No  |
| 58 | Male   | 159 | 49 | 112 | 80 | Yes |
| 41 | Female | 140 | 55 | 140 | 81 | Yes |
| 68 | Male   | 152 | 51 | 152 | 89 | Yes |
| 60 | Male   | 155 | 58 | 112 | 78 | Yes |
| 44 | Male   | 145 | 58 | 114 | 82 | Yes |
| 57 | Male   | 146 | 56 | 118 | 81 | Yes |
| 49 | Female | 165 | 71 | 132 | 88 | No  |
| 64 | Male   | 148 | 77 | 108 | 75 | Yes |
| 61 | Male   | 153 | 76 | 132 | 95 | Yes |
| 52 | Female | 154 | 69 | 145 | 74 | No  |
| 60 | Female | 165 | 66 | 149 | 75 | Yes |
| 66 | Male   | 166 | 72 | 99  | 83 | No  |
| 47 | Female | 178 | 73 | 90  | 88 | Yes |
| 61 | Female | 179 | 68 | 111 | 95 | Yes |
| 54 | Female | 144 | 69 | 134 | 92 | Yes |
| 41 | Male   | 165 | 56 | 104 | 80 | Yes |
| 64 | Male   | 167 | 56 | 149 | 78 | Yes |
| 43 | Female | 156 | 51 | 121 | 89 | Yes |
| 42 | Female | 155 | 65 | 107 | 81 | No  |
| 51 | Male   | 176 | 65 | 120 | 88 | Yes |
| 54 | Male   | 178 | 62 | 118 | 95 | Yes |
| 47 | Male   | 179 | 69 | 142 | 92 | No  |
| 48 | Male   | 145 | 70 | 121 | 80 | Yes |
| 62 | Male   | 146 | 71 | 140 | 78 | No  |
| 42 | Male   | 165 | 81 | 132 | 89 | Yes |
| 58 | Male   | 155 | 83 | 120 | 81 | Yes |
| 56 | Male   | 152 | 83 | 135 | 95 | Yes |
| 58 | Male   | 150 | 84 | 123 | 71 | Yes |
| 53 | Male   | 151 | 84 | 101 | 88 | Yes |
| 68 | Male   | 145 | 78 | 141 | 80 | Yes |
| 42 | Male   | 149 | 77 | 133 | 78 | No  |
| 59 | Male   | 145 | 71 | 132 | 95 | Yes |
| 41 | Male   | 148 | 77 | 147 | 88 | Yes |
| 41 | Male   | 152 | 70 | 137 | 94 | No  |
| 35 | Male   | 157 | 73 | 118 | 72 | Yes |
| 56 | Male   | 156 | 69 | 147 | 94 | No  |
| 47 | Female | 178 | 66 | 120 | 87 | Yes |



|    |        |     |    |     |    |     |
|----|--------|-----|----|-----|----|-----|
| 40 | Male   | 166 | 86 | 120 | 95 | Yes |
| 54 | Female | 178 | 81 | 114 | 87 | Yes |
| 59 | Male   | 178 | 83 | 149 | 80 | Yes |
| 60 | Female | 176 | 69 | 138 | 84 | Yes |
| 48 | Male   | 177 | 70 | 121 | 71 | Yes |
| 54 | Female | 145 | 71 | 131 | 95 | Yes |
| 58 | Female | 156 | 71 | 138 | 78 | Yes |
| 58 | Female | 176 | 67 | 120 | 75 | No  |
| 42 | Male   | 179 | 68 | 121 | 77 | Yes |
| 68 | Male   | 169 | 66 | 110 | 72 | Yes |
| 65 | Male   | 174 | 67 | 126 | 88 | Yes |
| 54 | Female | 171 | 60 | 121 | 85 | No  |
| 43 | Female | 169 | 66 | 114 | 95 | Yes |
| 62 | Female | 165 | 67 | 129 | 90 | Yes |
| 56 | Male   | 176 | 64 | 130 | 90 | Yes |
| 43 | Female | 178 | 72 | 101 | 84 | No  |
| 64 | Male   | 165 | 73 | 105 | 88 | Yes |
| 62 | Male   | 153 | 59 | 136 | 82 | Yes |
| 50 | Male   | 153 | 81 | 152 | 66 | Yes |
| 50 | Male   | 155 | 82 | 145 | 89 | No  |
| 57 | Female | 156 | 85 | 100 | 78 | Yes |
| 42 | Female | 157 | 66 | 122 | 82 | Yes |
| 67 | Female | 156 | 72 | 102 | 92 | Yes |
| 43 | Male   | 157 | 79 | 101 | 79 | No  |
| 66 | Male   | 158 | 74 | 145 | 80 | Yes |
| 44 | Male   | 159 | 76 | 109 | 86 | Yes |
| 58 | Male   | 161 | 87 | 120 | 81 | Yes |
| 67 | Male   | 165 | 90 | 125 | 80 | No  |
| 57 | Female | 166 | 83 | 142 | 88 | Yes |
| 56 | Male   | 176 | 76 | 97  | 90 | Yes |
| 58 | Male   | 171 | 80 | 128 | 92 | Yes |
| 39 | Male   | 172 | 76 | 120 | 98 | No  |
| 40 | Male   | 143 | 68 | 97  | 95 | Yes |
| 68 | Male   | 147 | 64 | 123 | 90 | Yes |
| 64 | Male   | 149 | 67 | 100 | 85 | Yes |
| 59 | Male   | 156 | 63 | 127 | 88 | Yes |
| 58 | Female | 155 | 59 | 109 | 89 | Yes |
| 29 | Male   | 154 | 61 | 152 | 75 | Yes |
| 71 | Female | 152 | 76 | 118 | 77 | No  |
| 60 | Male   | 151 | 72 | 142 | 90 | Yes |
| 50 | Male   | 153 | 89 | 99  | 88 | Yes |
| 53 | Female | 158 | 90 | 98  | 89 | No  |
| 59 | Male   | 169 | 88 | 102 | 92 | No  |
| 65 | Female | 166 | 68 | 101 | 82 | No  |
| 56 | Male   | 179 | 76 | 100 | 87 | Yes |
| 42 | Male   | 177 | 59 | 115 | 81 | Yes |
| 62 | Male   | 176 | 79 | 114 | 82 | No  |

|    |        |     |    |     |    |     |
|----|--------|-----|----|-----|----|-----|
| 50 | Male   | 167 | 80 | 120 | 95 | No  |
| 45 | Female | 178 | 67 | 123 | 89 | Yes |
| 58 | Male   | 179 | 76 | 132 | 97 | Yes |
| 76 | Female | 174 | 68 | 111 | 95 | No  |
| 59 | Male   | 167 | 69 | 120 | 80 | Yes |
| 62 | Female | 168 | 64 | 151 | 91 | No  |
| 53 | Male   | 156 | 92 | 142 | 80 | Yes |
| 42 | Female | 159 | 90 | 123 | 78 | Yes |
| 60 | Male   | 180 | 89 | 132 | 87 | Yes |
| 64 | Female | 174 | 88 | 128 | 90 | Yes |
| 61 | Male   | 173 | 79 | 99  | 95 | No  |
| 54 | Male   | 156 | 94 | 135 | 92 | Yes |
| 65 | Male   | 154 | 79 | 124 | 97 | Yes |
| 55 | Male   | 154 | 81 | 120 | 90 | Yes |
| 67 | Female | 157 | 82 | 125 | 97 | Yes |
| 58 | Male   | 159 | 76 | 132 | 93 | Yes |
| 46 | Female | 140 | 78 | 125 | 91 | Yes |
| 40 | Female | 152 | 75 | 128 | 95 | Yes |
| 57 | Female | 155 | 73 | 99  | 80 | Yes |
| 46 | Male   | 145 | 83 | 98  | 85 | No  |
| 62 | Female | 146 | 84 | 139 | 88 | Yes |
| 40 | Female | 165 | 82 | 99  | 86 | Yes |
| 44 | Male   | 148 | 76 | 102 | 87 | Yes |
| 42 | Female | 153 | 79 | 108 | 89 | Yes |
| 50 | Female | 154 | 78 | 132 | 71 | Yes |
| 60 | Female | 165 | 82 | 142 | 78 | Yes |
| 71 | Female | 166 | 84 | 145 | 80 | No  |
| 56 | Male   | 178 | 67 | 152 | 78 | Yes |
| 52 | Female | 179 | 66 | 132 | 95 | Yes |
| 58 | Female | 142 | 63 | 120 | 88 | No  |
| 52 | Female | 165 | 58 | 122 | 94 | Yes |
| 64 | Female | 167 | 56 | 118 | 72 | No  |
| 60 | Female | 156 | 67 | 105 | 94 | Yes |
| 59 | Female | 155 | 58 | 120 | 87 | Yes |
| 77 | Female | 176 | 61 | 123 | 95 | No  |
| 46 | Male   | 178 | 63 | 126 | 87 | Yes |
| 58 | Male   | 179 | 67 | 127 | 80 | No  |
| 60 | Female | 145 | 78 | 128 | 84 | Yes |
| 50 | Female | 146 | 79 | 120 | 71 | No  |
| 53 | Male   | 165 | 92 | 123 | 95 | No  |
| 58 | Male   | 155 | 54 | 124 | 78 | Yes |
| 58 | Male   | 152 | 55 | 125 | 75 | Yes |
| 57 | Male   | 150 | 59 | 124 | 77 | Yes |
| 50 | Male   | 151 | 61 | 120 | 82 | No  |
| 46 | Male   | 145 | 61 | 90  | 88 | No  |
| 54 | Male   | 149 | 89 | 93  | 85 | Yes |
| 66 | Male   | 145 | 89 | 92  | 95 | No  |

|    |        |     |    |     |    |     |
|----|--------|-----|----|-----|----|-----|
| 57 | Male   | 148 | 90 | 94  | 90 | Yes |
| 48 | Male   | 152 | 60 | 99  | 90 | No  |
| 60 | Male   | 157 | 66 | 100 | 84 | Yes |
| 55 | Male   | 156 | 64 | 124 | 88 | Yes |
| 59 | Male   | 178 | 67 | 125 | 82 | No  |
| 52 | Male   | 166 | 61 | 95  | 66 | No  |
| 51 | Male   | 177 | 62 | 121 | 89 | No  |
| 69 | Male   | 179 | 86 | 110 | 78 | Yes |
| 38 | Male   | 178 | 62 | 92  | 82 | Yes |
| 66 | Male   | 177 | 69 | 111 | 92 | No  |
| 35 | Female | 145 | 75 | 108 | 79 | No  |
| 42 | Female | 156 | 72 | 102 | 80 | No  |
| 60 | Male   | 176 | 70 | 101 | 86 | Yes |
| 59 | Male   | 179 | 67 | 101 | 74 | Yes |
| 60 | Female | 169 | 66 | 142 | 80 | No  |
| 74 | Male   | 174 | 79 | 121 | 88 | No  |
| 54 | Male   | 177 | 89 | 148 | 90 | Yes |
| 55 | Female | 166 | 90 | 145 | 80 | No  |
| 52 | Male   | 165 | 93 | 101 | 98 | Yes |
| 42 | Male   | 176 | 94 | 108 | 95 | Yes |
| 62 | Female | 178 | 87 | 132 | 90 | No  |
| 56 | Male   | 165 | 49 | 112 | 85 | Yes |
| 44 | Male   | 153 | 58 | 120 | 88 | Yes |
| 59 | Male   | 153 | 84 | 102 | 89 | No  |
| 59 | Male   | 155 | 88 | 121 | 75 | No  |
| 47 | Male   | 156 | 94 | 120 | 77 | No  |
| 56 | Male   | 157 | 91 | 119 | 90 | Yes |
| 67 | Female | 156 | 68 | 123 | 88 | Yes |
| 58 | Male   | 157 | 88 | 98  | 89 | Yes |
| 44 | Female | 158 | 69 | 142 | 82 | Yes |
| 58 | Male   | 159 | 81 | 130 | 82 | Yes |
| 56 | Male   | 161 | 83 | 132 | 87 | No  |
| 62 | Female | 165 | 85 | 96  | 81 | Yes |
| 67 | Male   | 166 | 76 | 120 | 82 | Yes |
| 58 | Female | 176 | 71 | 115 | 95 | Yes |
| 59 | Male   | 171 | 72 | 135 | 98 | No  |
| 54 | Female | 172 | 77 | 98  | 97 | Yes |
| 54 | Female | 143 | 66 | 121 | 95 | No  |
| 58 | Female | 147 | 54 | 131 | 85 | Yes |
| 52 | Female | 149 | 58 | 101 | 91 | No  |
| 60 | Female | 156 | 56 | 135 | 80 | No  |
| 57 | Female | 155 | 67 | 148 | 78 | No  |
| 49 | Female | 154 | 65 | 145 | 87 | Yes |
| 42 | Female | 152 | 68 | 109 | 90 | No  |
| 52 | Male   | 151 | 69 | 152 | 95 | No  |
| 41 | Male   | 153 | 73 | 108 | 92 | No  |
| 67 | Female | 158 | 77 | 128 | 97 | Yes |

|    |        |     |    |     |    |     |
|----|--------|-----|----|-----|----|-----|
| 48 | Male   | 177 | 79 | 121 | 90 | No  |
| 47 | Female | 166 | 61 | 111 | 97 | Yes |
| 58 | Female | 179 | 55 | 105 | 93 | Yes |
| 61 | Male   | 177 | 54 | 122 | 91 | Yes |
| 60 | Female | 176 | 50 | 149 | 77 | Yes |
| 46 | Male   | 167 | 51 | 110 | 95 | No  |
| 46 | Male   | 178 | 55 | 135 | 87 | No  |
| 66 | Female | 179 | 52 | 145 | 81 | Yes |
| 68 | Male   | 174 | 51 | 145 | 84 | Yes |
| 41 | Female | 167 | 65 | 147 | 71 | No  |
| 59 | Male   | 168 | 67 | 145 | 95 | Yes |
| 58 | Male   | 156 | 92 | 145 | 78 | No  |
| 57 | Male   | 159 | 88 | 152 | 75 | Yes |
| 55 | Male   | 180 | 82 | 121 | 77 | Yes |
| 57 | Male   | 174 | 81 | 111 | 99 | Yes |
| 51 | Male   | 173 | 81 | 109 | 88 | No  |
| 40 | Male   | 156 | 84 | 102 | 85 | No  |
| 42 | Female | 154 | 67 | 101 | 95 | No  |
| 49 | Female | 154 | 78 | 109 | 71 | No  |
| 49 | Female | 157 | 77 | 108 | 88 | No  |
| 56 | Male   | 159 | 75 | 121 | 81 | Yes |
| 58 | Female | 140 | 75 | 118 | 75 | No  |
| 69 | Male   | 152 | 67 | 123 | 78 | Yes |
| 59 | Male   | 155 | 65 | 132 | 68 | Yes |
| 48 | Male   | 145 | 80 | 134 | 81 | No  |
| 46 | Female | 146 | 81 | 151 | 90 | Yes |
| 41 | Male   | 165 | 82 | 120 | 80 | Yes |
| 56 | Male   | 148 | 69 | 134 | 69 | Yes |
| 60 | Female | 153 | 65 | 111 | 88 | Yes |
| 65 | Female | 154 | 62 | 108 | 68 | No  |
| 49 | Male   | 165 | 61 | 135 | 73 | Yes |
| 56 | Male   | 166 | 60 | 110 | 85 | Yes |
| 52 | Male   | 177 | 65 | 112 | 88 | No  |
| 59 | Male   | 179 | 61 | 110 | 97 | Yes |
| 61 | Female | 147 | 62 | 95  | 78 | No  |
| 52 | Male   | 165 | 59 | 142 | 85 | Yes |
| 48 | Male   | 167 | 58 | 98  | 66 | No  |
| 60 | Female | 156 | 81 | 132 | 87 | Yes |
| 53 | Female | 155 | 71 | 121 | 75 | No  |
| 58 | Female | 176 | 72 | 102 | 78 | Yes |
| 52 | Female | 178 | 70 | 107 | 88 | No  |
| 59 | Female | 179 | 72 | 101 | 80 | No  |
| 41 | Female | 145 | 87 | 101 | 87 | No  |
| 58 | Female | 146 | 88 | 120 | 84 | No  |
| 64 | Female | 165 | 83 | 125 | 90 | Yes |
| 54 | Female | 155 | 45 | 110 | 82 | Yes |
| 55 | Female | 152 | 56 | 134 | 74 | Yes |

|    |        |     |    |     |    |     |
|----|--------|-----|----|-----|----|-----|
| 68 | Female | 150 | 67 | 148 | 80 | No  |
| 59 | Female | 151 | 71 | 110 | 88 | No  |
| 67 | Female | 145 | 71 | 95  | 85 | No  |
| 54 | Male   | 149 | 75 | 142 | 90 | Yes |
| 42 | Male   | 145 | 67 | 98  | 81 | Yes |
| 70 | Female | 148 | 87 | 132 | 78 | No  |
| 34 | Female | 152 | 69 | 121 | 90 | No  |
| 52 | Male   | 157 | 67 | 102 | 88 | No  |
| 45 | Female | 156 | 59 | 107 | 75 | No  |
| 53 | Female | 178 | 81 | 101 | 91 | No  |
| 52 | Female | 166 | 65 | 101 | 85 | Yes |
| 44 | Female | 177 | 68 | 120 | 74 | Yes |
| 43 | Male   | 179 | 61 | 125 | 75 | No  |
| 58 | Male   | 179 | 60 | 110 | 88 | Yes |
| 39 | Male   | 177 | 59 | 134 | 91 | No  |
| 57 | Male   | 145 | 54 | 148 | 80 | No  |
| 58 | Male   | 156 | 51 | 141 | 78 | No  |
| 37 | Female | 176 | 55 | 129 | 81 | No  |
| 57 | Male   | 179 | 51 | 130 | 80 | No  |
| 69 | Male   | 177 | 56 | 145 | 69 | No  |
| 50 | Female | 174 | 77 | 134 | 91 | Yes |
| 53 | Male   | 155 | 76 | 134 | 88 | Yes |
| 57 | Male   | 154 | 76 | 128 | 90 | Yes |
| 46 | Male   | 165 | 77 | 132 | 88 | No  |
| 37 | Male   | 176 | 65 | 120 | 81 | No  |
| 54 | Male   | 178 | 67 | 120 | 65 | Yes |
| 60 | Male   | 165 | 71 | 101 | 68 | Yes |
| 48 | Male   | 153 | 72 | 142 | 88 | No  |
| 61 | Female | 153 | 77 | 120 | 88 | Yes |
| 46 | Male   | 155 | 79 | 140 | 82 | No  |
| 61 | Male   | 156 | 75 | 120 | 71 | No  |
| 68 | Male   | 157 | 56 | 104 | 92 | Yes |
| 47 | Male   | 156 | 56 | 142 | 84 | Yes |
| 67 | Male   | 157 | 74 | 121 | 81 | Yes |
| 53 | Female | 158 | 67 | 99  | 88 | Yes |
| 70 | Male   | 159 | 61 | 118 | 94 | Yes |
| 43 | Male   | 161 | 65 | 120 | 75 | No  |
| 48 | Male   | 165 | 76 | 148 | 73 | No  |
| 42 | Male   | 166 | 49 | 119 | 81 | No  |
| 42 | Male   | 176 | 49 | 101 | 88 | No  |
| 60 | Male   | 171 | 55 | 139 | 78 | Yes |
| 47 | Male   | 172 | 51 | 118 | 81 | No  |
| 65 | Female | 143 | 58 | 105 | 85 | No  |
| 62 | Female | 147 | 58 | 121 | 71 | No  |
| 62 | Female | 149 | 56 | 149 | 92 | Yes |
| 62 | Female | 156 | 71 | 114 | 75 | No  |
| 74 | Female | 155 | 77 | 114 | 89 | No  |

|    |        |     |    |     |    |     |
|----|--------|-----|----|-----|----|-----|
| 63 | Male   | 154 | 76 | 101 | 92 | Yes |
| 56 | Female | 152 | 69 | 145 | 66 | No  |
| 41 | Male   | 151 | 66 | 135 | 77 | Yes |
| 58 | Female | 153 | 72 | 110 | 90 | No  |
| 35 | Female | 158 | 73 | 104 | 90 | No  |
| 51 | Female | 177 | 79 | 119 | 84 | Yes |
| 64 | Female | 166 | 80 | 152 | 88 | Yes |
| 52 | Female | 179 | 56 | 117 | 82 | Yes |
| 48 | Male   | 177 | 56 | 140 | 66 | No  |
| 60 | Female | 176 | 51 | 138 | 89 | No  |
| 71 | Female | 177 | 65 | 101 | 78 | No  |
| 56 | Female | 152 | 65 | 117 | 82 | No  |
| 54 | Female | 179 | 62 | 123 | 92 | Yes |
| 52 | Male   | 174 | 69 | 135 | 79 | Yes |
| 62 | Female | 167 | 70 | 101 | 80 | No  |
| 38 | Male   | 168 | 71 | 107 | 86 | No  |
| 57 | Male   | 156 | 81 | 123 | 75 | Yes |
| 58 | Male   | 153 | 83 | 148 | 71 | No  |
| 43 | Male   | 180 | 83 | 118 | 90 | No  |
| 59 | Male   | 174 | 84 | 132 | 95 | No  |
| 63 | Male   | 173 | 82 | 109 | 65 | No  |
| 58 | Male   | 156 | 78 | 142 | 80 | Yes |
| 57 | Male   | 154 | 77 | 142 | 85 | Yes |
| 55 | Male   | 154 | 71 | 104 | 85 | Yes |
| 35 | Male   | 157 | 77 | 105 | 75 | Yes |
| 42 | Male   | 159 | 83 | 98  | 76 | Yes |
| 56 | Male   | 160 | 73 | 121 | 88 | No  |
| 63 | Male   | 162 | 69 | 145 | 77 | No  |
| 61 | Male   | 165 | 66 | 149 | 68 | Yes |
| 51 | Male   | 168 | 86 | 118 | 69 | No  |
| 44 | Male   | 167 | 81 | 152 | 74 | Yes |
| 51 | Male   | 169 | 83 | 101 | 78 | Yes |
| 39 | Male   | 140 | 69 | 132 | 84 | No  |
| 62 | Male   | 152 | 85 | 152 | 78 | Yes |
| 61 | Male   | 155 | 71 | 100 | 88 | Yes |
| 58 | Male   | 145 | 71 | 120 | 95 | Yes |
| 44 | Male   | 146 | 67 | 151 | 78 | No  |
| 66 | Female | 165 | 68 | 121 | 78 | No  |
| 52 | Male   | 148 | 66 | 99  | 78 | No  |
| 52 | Female | 153 | 67 | 95  | 89 | Yes |
| 56 | Male   | 154 | 60 | 111 | 88 | No  |
| 64 | Female | 165 | 66 | 108 | 66 | Yes |
| 70 | Female | 166 | 67 | 121 | 80 | Yes |
| 52 | Male   | 177 | 64 | 102 | 80 | Yes |
| 55 | Male   | 179 | 72 | 152 | 98 | No  |
| 56 | Male   | 145 | 73 | 121 | 80 | No  |
| 46 | Female | 165 | 59 | 142 | 90 | Yes |

|    |        |     |    |     |    |     |
|----|--------|-----|----|-----|----|-----|
| 42 | Female | 167 | 81 | 131 | 88 | No  |
| 37 | Female | 156 | 82 | 148 | 67 | No  |
| 50 | Female | 155 | 85 | 143 | 88 | Yes |
| 58 | Male   | 176 | 66 | 129 | 80 | No  |
| 57 | Male   | 178 | 86 | 108 | 71 | No  |
| 52 | Male   | 179 | 52 | 135 | 68 | Yes |
| 58 | Female | 145 | 55 | 120 | 95 | No  |
| 60 | Female | 146 | 56 | 140 | 85 | Yes |
| 65 | Female | 165 | 60 | 150 | 78 | No  |
| 50 | Female | 155 | 60 | 112 | 76 | Yes |
| 66 | Female | 152 | 61 | 142 | 66 | Yes |
| 67 | Male   | 150 | 57 | 147 | 84 | Yes |
| 48 | Female | 151 | 57 | 114 | 81 | No  |
| 58 | Male   | 145 | 58 | 131 | 71 | Yes |
| 54 | Male   | 149 | 70 | 142 | 84 | No  |
| 44 | Male   | 145 | 75 | 151 | 92 | No  |
| 65 | Female | 148 | 79 | 132 | 80 | Yes |
| 66 | Female | 152 | 83 | 138 | 88 | No  |
| 67 | Female | 157 | 52 | 101 | 92 | No  |
| 46 | Female | 156 | 65 | 110 | 76 | Yes |
| 49 | Male   | 178 | 67 | 108 | 86 | No  |
| 55 | Female | 166 | 60 | 104 | 69 | No  |
| 63 | Female | 177 | 67 | 101 | 93 | Yes |
| 40 | Female | 179 | 80 | 145 | 90 | Yes |
| 59 | Male   | 180 | 81 | 110 | 74 | No  |
| 43 | Male   | 177 | 83 | 132 | 84 | No  |
| 67 | Male   | 145 | 60 | 132 | 82 | No  |
| 69 | Female | 156 | 61 | 123 | 90 | No  |
| 55 | Male   | 176 | 65 | 129 | 82 | Yes |
| 43 | Male   | 179 | 59 | 118 | 95 | No  |
| 44 | Female | 177 | 57 | 142 | 89 | Yes |
| 52 | Male   | 174 | 59 | 131 | 90 | Yes |
| 57 | Female | 169 | 55 | 95  | 98 | No  |
| 57 | Female | 171 | 50 | 131 | 80 | No  |
| 58 | Male   | 165 | 53 | 142 | 95 | No  |
| 70 | Male   | 176 | 54 | 138 | 99 | No  |
| 35 | Female | 178 | 59 | 105 | 80 | Yes |
| 66 | Male   | 165 | 76 | 102 | 80 | Yes |
| 58 | Male   | 153 | 71 | 128 | 83 | No  |
| 64 | Female | 153 | 76 | 148 | 82 | Yes |
| 39 | Male   | 158 | 68 | 141 | 81 | No  |
| 67 | Male   | 177 | 64 | 129 | 66 | No  |
| 55 | Male   | 168 | 67 | 130 | 95 | No  |
| 41 | Female | 179 | 63 | 145 | 77 | No  |
| 46 | Female | 177 | 59 | 134 | 87 | Yes |
| 57 | Female | 176 | 61 | 134 | 82 | No  |
| 57 | Female | 177 | 76 | 128 | 92 | Yes |

|    |        |     |    |     |    |     |
|----|--------|-----|----|-----|----|-----|
| 55 | Female | 178 | 72 | 132 | 88 | No  |
| 60 | Female | 179 | 89 | 120 | 66 | Yes |
| 49 | Female | 174 | 90 | 120 | 89 | No  |
| 51 | Male   | 167 | 88 | 101 | 78 | No  |
| 57 | Male   | 168 | 68 | 142 | 88 | Yes |
| 61 | Male   | 156 | 76 | 120 | 95 | Yes |
| 55 | Female | 159 | 59 | 140 | 80 | No  |
| 66 | Male   | 180 | 80 | 120 | 98 | Yes |
| 56 | Male   | 174 | 81 | 104 | 91 | Yes |
| 48 | Male   | 173 | 67 | 142 | 68 | Yes |
| 56 | Male   | 156 | 76 | 121 | 90 | Yes |
| 63 | Male   | 154 | 68 | 99  | 70 | Yes |
| 55 | Female | 154 | 69 | 118 | 75 | No  |
| 51 | Female | 157 | 64 | 120 | 85 | No  |
| 59 | Female | 159 | 92 | 148 | 69 | No  |
| 52 | Female | 140 | 90 | 119 | 75 | No  |
| 64 | Male   | 152 | 89 | 101 | 81 | No  |
| 57 | Male   | 155 | 88 | 139 | 80 | Yes |
| 58 | Female | 145 | 79 | 118 | 77 | No  |
| 42 | Male   | 146 | 94 | 105 | 92 | No  |
| 67 | Male   | 165 | 79 | 121 | 82 | Yes |
| 58 | Male   | 148 | 81 | 149 | 78 | Yes |
| 69 | Male   | 153 | 82 | 114 | 82 | No  |
| 66 | Male   | 154 | 76 | 114 | 86 | Yes |
| 63 | Male   | 165 | 78 | 101 | 94 | Yes |
| 51 | Male   | 168 | 75 | 145 | 92 | Yes |
| 64 | Male   | 177 | 73 | 135 | 72 | No  |
| 57 | Male   | 179 | 83 | 110 | 79 | No  |
| 52 | Male   | 143 | 84 | 104 | 83 | Yes |
| 45 | Male   | 165 | 82 | 119 | 88 | Yes |
| 59 | Male   | 167 | 76 | 152 | 66 | Yes |
| 46 | Female | 156 | 79 | 117 | 86 | Yes |
| 46 | Female | 155 | 78 | 146 | 85 | No  |
| 41 | Female | 176 | 82 | 138 | 79 | No  |
| 57 | Male   | 146 | 60 | 101 | 80 | Yes |
| 50 | Female | 165 | 61 | 101 | 81 | No  |
| 57 | Male   | 148 | 80 | 142 | 90 | Yes |
| 58 | Male   | 153 | 57 | 121 | 91 | Yes |
| 62 | Male   | 154 | 58 | 148 | 91 | No  |
| 41 | Male   | 165 | 70 | 145 | 89 | No  |
| 46 | Male   | 179 | 79 | 108 | 82 | Yes |
| 61 | Female | 155 | 67 | 120 | 88 | No  |
| 51 | Female | 178 | 81 | 123 | 88 | Yes |
| 43 | Female | 146 | 80 | 130 | 80 | No  |
| 39 | Female | 152 | 57 | 120 | 81 | No  |
| 36 | Female | 150 | 59 | 115 | 95 | Yes |
| 70 | Male   | 145 | 50 | 98  | 66 | Yes |



|    |        |     |    |     |    |     |
|----|--------|-----|----|-----|----|-----|
| 48 | Female | 149 | 53 | 121 | 80 | No  |
| 39 | Female | 145 | 54 | 131 | 78 | Yes |
| 60 | Female | 148 | 59 | 101 | 95 | No  |
| 42 | Female | 152 | 76 | 135 | 88 | Yes |
| 39 | Male   | 157 | 71 | 148 | 94 | No  |
| 63 | Female | 156 | 68 | 145 | 72 | Yes |
| 52 | Male   | 150 | 79 | 109 | 94 | Yes |
| 55 | Female | 152 | 85 | 152 | 67 | Yes |
| 53 | Male   | 179 | 88 | 108 | 95 | No  |
| 44 | Male   | 176 | 76 | 149 | 78 | No  |
| 54 | Female | 180 | 87 | 110 | 75 | Yes |
| 42 | Male   | 153 | 83 | 111 | 75 | Yes |
| 42 | Male   | 155 | 80 | 102 | 68 | No  |
| 45 | Female | 156 | 76 | 101 | 81 | Yes |
| 55 | Female | 157 | 68 | 109 | 90 | Yes |
| 52 | Male   | 156 | 64 | 108 | 80 | Yes |
| 67 | Male   | 157 | 67 | 121 | 69 | No  |
| 58 | Male   | 158 | 63 | 118 | 88 | No  |
| 57 | Male   | 159 | 59 | 123 | 68 | Yes |
| 64 | Male   | 161 | 61 | 132 | 73 | No  |
| 61 | Male   | 165 | 76 | 134 | 85 | No  |
| 50 | Female | 166 | 72 | 151 | 88 | No  |
| 43 | Female | 176 | 89 | 120 | 97 | Yes |
| 63 | Female | 171 | 66 | 134 | 78 | No  |
| 41 | Female | 172 | 88 | 111 | 85 | No  |
| 48 | Male   | 143 | 68 | 108 | 66 | Yes |
| 66 | Female | 147 | 76 | 135 | 87 | Yes |
| 45 | Female | 149 | 59 | 110 | 75 | Yes |
| 76 | Female | 156 | 78 | 112 | 78 | Yes |
| 52 | Female | 152 | 76 | 142 | 91 | No  |
| 57 | Female | 151 | 68 | 98  | 89 | No  |
| 58 | Female | 158 | 64 | 121 | 82 | No  |
| 37 | Male   | 179 | 70 | 102 | 81 | No  |
| 58 | Male   | 180 | 70 | 107 | 88 | Yes |
| 66 | Female | 175 | 70 | 101 | 95 | Yes |
| 55 | Female | 167 | 70 | 125 | 92 | Yes |
| 45 | Male   | 174 | 70 | 148 | 95 | Yes |
| 67 | Male   | 168 | 70 | 129 | 80 | Yes |
| 58 | Female | 156 | 70 | 130 | 78 | Yes |
| 44 | Male   | 180 | 83 | 134 | 81 | Yes |
| 41 | Male   | 174 | 84 | 134 | 95 | Yes |
| 53 | Female | 156 | 76 | 132 | 72 | No  |
| 51 | Male   | 159 | 86 | 142 | 88 | No  |
| 46 | Male   | 152 | 66 | 140 | 88 | Yes |
| 51 | Male   | 155 | 63 | 120 | 88 | Yes |
| 47 | Male   | 153 | 61 | 118 | 81 | Yes |
| 52 | Female | 165 | 67 | 148 | 94 | No  |

|    |        |     |    |     |    |     |
|----|--------|-----|----|-----|----|-----|
| 53 | Female | 180 | 78 | 119 | 75 | Yes |
| 68 | Female | 141 | 54 | 118 | 88 | Yes |
| 64 | Female | 165 | 55 | 105 | 78 | Yes |
| 59 | Male   | 155 | 61 | 114 | 71 | Yes |
| 63 | Female | 146 | 66 | 110 | 66 | No  |
| 74 | Male   | 155 | 67 | 119 | 90 | Yes |
| 54 | Male   | 151 | 85 | 146 | 88 | No  |
| 40 | Male   | 149 | 82 | 101 | 66 | Yes |
| 53 | Female | 145 | 75 | 117 | 89 | Yes |
| 69 | Male   | 157 | 67 | 101 | 92 | Yes |
| 74 | Female | 145 | 79 | 123 | 80 | Yes |
| 61 | Male   | 160 | 89 | 148 | 86 | No  |
| 59 | Male   | 165 | 90 | 118 | 65 | No  |
| 60 | Male   | 180 | 65 | 132 | 71 | Yes |
| 67 | Female | 162 | 94 | 109 | 90 | Yes |
| 56 | Male   | 178 | 65 | 142 | 95 | No  |
| 49 | Female | 145 | 49 | 142 | 65 | Yes |
| 65 | Female | 156 | 65 | 104 | 80 | Yes |
| 46 | Male   | 176 | 65 | 105 | 85 | Yes |
| 44 | Female | 150 | 88 | 98  | 85 | No  |
| 69 | Male   | 179 | 65 | 121 | 75 | No  |
| 64 | Female | 155 | 91 | 145 | 76 | Yes |
| 41 | Male   | 165 | 65 | 149 | 88 | Yes |
| 51 | Female | 163 | 88 | 118 | 77 | No  |
| 64 | Male   | 165 | 65 | 152 | 68 | Yes |
| 59 | Female | 160 | 81 | 101 | 69 | Yes |
| 62 | Female | 178 | 65 | 132 | 71 | Yes |
| 54 | Male   | 165 | 85 | 152 | 83 | No  |
| 64 | Male   | 153 | 80 | 100 | 88 | No  |
| 62 | Female | 155 | 65 | 151 | 92 | Yes |
| 54 | Male   | 156 | 54 | 95  | 89 | Yes |
| 63 | Female | 158 | 56 | 108 | 95 | No  |
| 44 | Female | 159 | 67 | 121 | 71 | Yes |
| 57 | Male   | 165 | 68 | 152 | 80 | Yes |
| 48 | Female | 149 | 54 | 108 | 87 | Yes |
| 65 | Female | 156 | 50 | 135 | 95 | Yes |
| 51 | Female | 151 | 51 | 112 | 71 | No  |
| 41 | Female | 158 | 55 | 148 | 78 | No  |
| 41 | Male   | 167 | 55 | 138 | 95 | No  |
| 48 | Male   | 178 | 55 | 101 | 71 | Yes |
| 67 | Female | 167 | 55 | 104 | 75 | Yes |
| 56 | Male   | 168 | 55 | 101 | 78 | Yes |
| 66 | Male   | 156 | 55 | 145 | 68 | No  |
| 64 | Female | 165 | 81 | 132 | 80 | No  |
| 68 | Male   | 173 | 55 | 123 | 69 | Yes |
| 64 | Female | 154 | 55 | 142 | 73 | No  |
| 44 | Male   | 157 | 55 | 131 | 85 | No  |

|    |        |     |    |     |    |     |
|----|--------|-----|----|-----|----|-----|
| 52 | Male   | 140 | 55 | 131 | 97 | Yes |
| 43 | Female | 146 | 58 | 102 | 87 | No  |
| 43 | Female | 165 | 85 | 128 | 75 | No  |
| 43 | Female | 153 | 72 | 122 | 88 | Yes |
| 41 | Male   | 154 | 83 | 104 | 80 | Yes |
| 63 | Female | 179 | 83 | 105 | 82 | No  |
| 54 | Male   | 139 | 90 | 124 | 81 | Yes |
| 77 | Male   | 155 | 81 | 149 | 78 | Yes |
| 44 | Male   | 152 | 65 | 99  | 89 | No  |
| 54 | Male   | 152 | 55 | 107 | 89 | No  |
| 57 | Male   | 157 | 51 | 120 | 81 | No  |
| 66 | Female | 156 | 56 | 118 | 95 | Yes |
| 67 | Male   | 180 | 71 | 121 | 98 | Yes |
| 41 | Male   | 179 | 76 | 140 | 80 | Yes |
| 43 | Male   | 180 | 77 | 132 | 78 | Yes |
| 51 | Male   | 180 | 67 | 135 | 88 | No  |
| 50 | Male   | 155 | 56 | 149 | 80 | No  |
| 47 | Male   | 159 | 74 | 118 | 84 | Yes |
| 43 | Male   | 176 | 61 | 120 | 95 | Yes |
| 55 | Male   | 178 | 65 | 120 | 78 | Yes |
| 67 | Male   | 153 | 49 | 149 | 77 | No  |
| 35 | Male   | 153 | 49 | 138 | 92 | No  |
| 66 | Male   | 157 | 56 | 121 | 90 | Yes |
| 77 | Female | 158 | 71 | 110 | 84 | No  |
| 56 | Male   | 159 | 77 | 126 | 88 | No  |
| 56 | Male   | 161 | 76 | 121 | 82 | No  |
| 54 | Male   | 165 | 69 | 114 | 66 | Yes |
| 45 | Male   | 166 | 66 | 129 | 89 | No  |
| 59 | Male   | 171 | 73 | 101 | 82 | No  |
| 35 | Male   | 147 | 56 | 152 | 80 | No  |
| 48 | Male   | 155 | 65 | 122 | 80 | No  |
| 45 | Female | 154 | 65 | 102 | 88 | No  |
| 56 | Male   | 152 | 62 | 101 | 90 | No  |
| 62 | Female | 151 | 69 | 145 | 92 | No  |
| 47 | Male   | 158 | 71 | 120 | 95 | No  |
| 35 | Male   | 174 | 84 | 128 | 89 | No  |
| 38 | Male   | 167 | 78 | 97  | 77 | No  |
| 65 | Female | 178 | 77 | 123 | 90 | Yes |
| 71 | Female | 179 | 71 | 100 | 88 | No  |
| 57 | Female | 174 | 77 | 127 | 89 | Yes |
| 47 | Male   | 167 | 70 | 109 | 92 | No  |
| 42 | Female | 168 | 73 | 152 | 82 | No  |
| 54 | Female | 159 | 66 | 142 | 81 | Yes |
| 50 | Female | 180 | 86 | 99  | 82 | Yes |
| 55 | Female | 156 | 69 | 101 | 97 | No  |
| 46 | Male   | 154 | 78 | 100 | 95 | Yes |
| 48 | Male   | 157 | 71 | 114 | 91 | No  |

|    |        |     |     |     |    |           |
|----|--------|-----|-----|-----|----|-----------|
| 45 | Male   | 159 | 67  | 120 | 80 | Yes       |
| 34 | Male   | 140 | 68  | 123 | 78 | No        |
| 56 | Male   | 152 | 66  | 132 | 87 | No        |
| 53 | Male   | 155 | 67  | 111 | 90 | No        |
| 52 | Male   | 145 | 60  | 120 | 95 | Yes       |
| 41 | Male   | 146 | 66  | 151 | 92 | No        |
| 44 | Male   | 153 | 72  | 132 | 97 | Yes       |
| 45 | Female | 180 | 81  | 135 | 95 | Yes       |
| 66 | Male   | 139 | 66  | 125 | 88 | Yes       |
| 44 | Female | 165 | 80  | 132 | 86 | Yes       |
| 38 | Male   | 156 | 55  | 128 | 89 | No        |
| 54 | Male   | 146 | 57  | 108 | 88 | Yes       |
| 66 | Male   | 165 | 58  | 132 | 94 | Yes       |
| 55 | Female | 155 | 70  | 142 | 72 | No        |
| 48 | Male   | 150 | 79  | 152 | 87 | Yes       |
| 52 | Female | 151 | 83  | 132 | 95 | Yes       |
| 47 | Female | 145 | 52  | 120 | 87 | No        |
| 52 | Female | 149 | 65  | 122 | 80 | Yes       |
| 74 | Female | 152 | 67  | 120 | 95 | No        |
| 41 | Female | 156 | 81  | 126 | 75 | Yes       |
| 54 | Female | 178 | 83  | 127 | 77 | Yes       |
| 51 | Female | 181 | 60  | 128 | 99 | No        |
| 38 | Male   | 180 | 65  | 123 | 85 | Yes       |
| 52 | Male   | 149 | 57  | 125 | 90 | No        |
| 41 | Female | 145 | 59  | 124 | 90 | Yes       |
| 49 | Female | 156 | 55  | 120 | 84 | Yes       |
| 43 | Female | 176 | 50  | 90  | 88 | Yes       |
| 56 | Female | 180 | 53  | 93  | 82 | No        |
| 35 | Female | 165 | 68  | 124 | 92 | Yes       |
| 42 | Female | 176 | 79  | 125 | 79 | Yes       |
| 57 | Female | 140 | 50  | 95  | 80 | Not Known |
| 63 | Female | 152 | 55  | 121 | 86 | Not Known |
| 60 | Female | 145 | 65  | 92  | 80 | Not Known |
| 52 | Female | 165 | 61  | 108 | 90 | No        |
| 58 | Male   | 172 | 80  | 101 | 98 | Not Known |
| 62 | Male   | 172 | 90  | 101 | 95 | Not Known |
| 45 | Female | 172 | 100 | 121 | 85 | No        |
| 54 | Male   | 144 | 70  | 101 | 75 | No        |
| 62 | Female | 165 | 88  | 108 | 77 | Not Known |
| 61 | Male   | 155 | 50  | 120 | 89 | Not Known |
| 51 | Female | 178 | 81  | 121 | 82 | No        |
| 49 | Male   | 179 | 85  | 120 | 87 | Not Known |
| 43 | Female | 146 | 62  | 123 | 82 | No        |
| 57 | Male   | 165 | 75  | 98  | 95 | Not Known |
| 39 | Female | 152 | 57  | 130 | 97 | Yes       |
| 42 | Male   | 150 | 46  | 132 | 95 | No        |
| 57 | Male   | 175 | 95  | 96  | 98 | Yes       |

|    |        |     |     |     |    |           |
|----|--------|-----|-----|-----|----|-----------|
| 70 | Female | 145 | 50  | 120 | 91 | No        |
| 48 | Female | 149 | 53  | 115 | 80 | Yes       |
| 60 | Female | 159 | 65  | 98  | 87 | No        |
| 39 | Male   | 157 | 55  | 131 | 95 | No        |
| 63 | Male   | 177 | 75  | 101 | 92 | No        |
| 57 | Female | 170 | 92  | 109 | 93 | No        |
| 44 | Male   | 176 | 76  | 111 | 80 | Yes       |
| 54 | Female | 140 | 68  | 105 | 84 | No        |
| 63 | Female | 172 | 103 | 122 | 71 | Yes       |
| 63 | Male   | 180 | 104 | 135 | 75 | Not Known |
| 42 | Male   | 155 | 80  | 121 | 88 | Not Known |
| 45 | Female | 156 | 58  | 111 | 81 | Not Known |
| 55 | Female | 157 | 60  | 109 | 75 | Yes       |
| 52 | Female | 156 | 50  | 102 | 78 | Not Known |
| 58 | Female | 175 | 77  | 109 | 81 | Not Known |
| 64 | Male   | 177 | 75  | 121 | 80 | No        |
| 61 | Male   | 165 | 55  | 118 | 69 | No        |
| 50 | Male   | 175 | 70  | 123 | 88 | No        |
| 43 | Male   | 176 | 95  | 132 | 68 | Yes       |
| 63 | Female | 171 | 68  | 134 | 73 | No        |
| 51 | Female | 149 | 73  | 111 | 78 | Yes       |
| 53 | Male   | 156 | 55  | 135 | 66 | Not Known |
| 48 | Male   | 154 | 77  | 110 | 87 | Not Known |
| 52 | Male   | 152 | 50  | 112 | 75 | Yes       |
| 58 | Male   | 179 | 64  | 95  | 88 | Yes       |
| 58 | Female | 156 | 77  | 98  | 87 | No        |
| 66 | Female | 164 | 83  | 121 | 90 | No        |
| 42 | Female | 176 | 82  | 102 | 82 | No        |
| 55 | Female | 178 | 75  | 107 | 74 | No        |
| 45 | Male   | 174 | 75  | 101 | 80 | Yes       |
| 35 | Female | 167 | 76  | 101 | 88 | No        |
| 67 | Female | 168 | 72  | 120 | 85 | No        |
| 41 | Female | 170 | 76  | 125 | 90 | Yes       |
| 44 | Female | 180 | 105 | 110 | 81 | No        |
| 41 | Female | 159 | 52  | 134 | 78 | Yes       |
| 53 | Female | 156 | 65  | 110 | 88 | No        |
| 62 | Male   | 154 | 65  | 95  | 75 | Not Known |
| 38 | Male   | 159 | 75  | 132 | 74 | No        |
| 46 | Male   | 158 | 55  | 102 | 88 | No        |
| 39 | Male   | 145 | 68  | 101 | 80 | Yes       |
| 51 | Male   | 165 | 86  | 101 | 78 | Yes       |
| 66 | Female | 170 | 73  | 120 | 81 | Not Known |
| 47 | Male   | 168 | 60  | 125 | 80 | Not Known |
| 28 | Female | 165 | 67  | 110 | 69 | No        |
| 68 | Female | 142 | 40  | 129 | 88 | Not Known |
| 64 | Female | 165 | 55  | 130 | 81 | No        |
| 31 | Male   | 167 | 75  | 145 | 65 | Not Known |

|    |        |     |     |     |    |           |
|----|--------|-----|-----|-----|----|-----------|
| 59 | Female | 179 | 85  | 134 | 88 | Yes       |
| 59 | Male   | 171 | 88  | 132 | 82 | No        |
| 60 | Male   | 179 | 74  | 120 | 71 | Not Known |
| 59 | Female | 165 | 71  | 101 | 84 | Not Known |
| 74 | Male   | 171 | 60  | 142 | 81 | No        |
| 54 | Female | 151 | 74  | 120 | 75 | No        |
| 49 | Male   | 145 | 55  | 104 | 73 | Yes       |
| 40 | Male   | 149 | 55  | 142 | 81 | No        |
| 52 | Male   | 148 | 72  | 99  | 78 | Not Known |
| 62 | Male   | 180 | 70  | 118 | 81 | Not Known |
| 69 | Female | 179 | 80  | 120 | 85 | Not Known |
| 49 | Male   | 156 | 78  | 148 | 71 | Not Known |
| 56 | Male   | 157 | 98  | 105 | 66 | No        |
| 49 | Female | 145 | 50  | 121 | 77 | No        |
| 65 | Female | 156 | 70  | 149 | 90 | Not Known |
| 46 | Male   | 176 | 76  | 114 | 90 | Yes       |
| 41 | Male   | 154 | 68  | 135 | 66 | No        |
| 51 | Female | 154 | 107 | 110 | 89 | No        |
| 64 | Female | 165 | 69  | 104 | 78 | Not Known |
| 62 | Female | 178 | 77  | 119 | 82 | No        |
| 62 | Female | 153 | 73  | 150 | 80 | Not Known |
| 42 | Female | 156 | 77  | 138 | 86 | Yes       |
| 56 | Female | 157 | 76  | 101 | 72 | Yes       |
| 54 | Male   | 180 | 65  | 117 | 71 | No        |
| 39 | Male   | 171 | 68  | 101 | 65 | No        |
| 48 | Female | 149 | 54  | 123 | 85 | No        |
| 65 | Female | 156 | 52  | 148 | 85 | Not Known |
| 57 | Female | 140 | 50  | 95  | 68 | Not Known |
| 63 | Female | 152 | 55  | 121 | 88 | Not Known |
| 70 | Male   | 169 | 82  | 110 | 90 | Not Known |
| 60 | Female | 145 | 65  | 92  | 81 | Not Known |
| 57 | Male   | 162 | 85  | 111 | 68 | Yes       |
| 52 | Female | 165 | 61  | 108 | 75 | No        |
| 57 | Female | 148 | 72  | 102 | 78 | Yes       |
| 58 | Male   | 172 | 80  | 101 | 84 | Not Known |
| 62 | Male   | 172 | 90  | 101 | 80 | Not Known |
| 41 | Male   | 165 | 70  | 142 | 81 | No        |
| 45 | Female | 172 | 100 | 121 | 90 | No        |
| 46 | Male   | 178 | 65  | 148 | 91 | Yes       |
| 74 | Female | 162 | 85  | 145 | 91 | Not Known |
| 54 | Male   | 144 | 70  | 101 | 89 | No        |
| 62 | Female | 165 | 88  | 108 | 78 | Not Known |
| 63 | Female | 172 | 88  | 132 | 82 | Not Known |
| 60 | Male   | 180 | 100 | 112 | 81 | Yes       |
| 61 | Male   | 155 | 50  | 120 | 88 | Not Known |
| 60 | Female | 172 | 93  | 102 | 75 | Not Known |
| 51 | Female | 178 | 81  | 121 | 95 | No        |

|    |        |     |     |     |    |           |
|----|--------|-----|-----|-----|----|-----------|
| 49 | Male   | 179 | 85  | 120 | 74 | Not Known |
| 61 | Female | 145 | 74  | 119 | 92 | Yes       |
| 43 | Female | 146 | 62  | 123 | 83 | No        |
| 57 | Male   | 165 | 75  | 98  | 88 | Not Known |
| 66 | Male   | 177 | 90  | 142 | 95 | Not Known |
| 39 | Female | 152 | 57  | 130 | 92 | Yes       |
| 42 | Male   | 150 | 46  | 132 | 80 | No        |
| 57 | Male   | 175 | 95  | 96  | 78 | Yes       |
| 70 | Female | 145 | 50  | 120 | 89 | No        |
| 48 | Female | 149 | 53  | 115 | 81 | Yes       |
| 39 | Female | 145 | 72  | 135 | 95 | Not Known |
| 60 | Female | 159 | 65  | 98  | 71 | No        |
| 42 | Male   | 175 | 85  | 121 | 99 | Yes       |
| 39 | Male   | 157 | 55  | 131 | 80 | No        |
| 63 | Male   | 177 | 75  | 101 | 78 | No        |
| 52 | Male   | 178 | 96  | 135 | 95 | No        |
| 55 | Male   | 183 | 105 | 148 | 88 | Not Known |
| 53 | Female | 162 | 92  | 145 | 94 | No        |
| 57 | Female | 170 | 92  | 109 | 72 | No        |
| 58 | Female | 168 | 102 | 152 | 94 | No        |
| 63 | Male   | 182 | 101 | 108 | 87 | Not Known |
| 62 | Female | 145 | 71  | 128 | 95 | Yes       |
| 70 | Female | 156 | 75  | 121 | 87 | Yes       |
| 44 | Male   | 176 | 76  | 111 | 80 | Yes       |
| 54 | Female | 140 | 68  | 105 | 84 | No        |
| 63 | Female | 172 | 103 | 122 | 71 | Yes       |
| 64 | Male   | 174 | 93  | 149 | 95 | Not Known |
| 60 | Male   | 178 | 109 | 110 | 78 | Yes       |
| 63 | Male   | 180 | 104 | 135 | 75 | Not Known |
| 53 | Male   | 181 | 100 | 155 | 77 | Yes       |
| 62 | Male   | 176 | 95  | 145 | 99 | Not Known |
| 45 | Male   | 178 | 80  | 147 | 88 | Yes       |
| 54 | Female | 165 | 90  | 145 | 85 | Not Known |
| 42 | Female | 153 | 48  | 145 | 95 | Yes       |
| 46 | Female | 153 | 76  | 152 | 71 | Yes       |
| 42 | Male   | 155 | 80  | 121 | 88 | Not Known |
| 45 | Female | 156 | 58  | 111 | 81 | Not Known |
| 55 | Female | 157 | 60  | 109 | 75 | Yes       |
| 52 | Female | 156 | 50  | 102 | 78 | Not Known |
| 67 | Male   | 178 | 50  | 101 | 68 | Yes       |
| 58 | Female | 175 | 77  | 109 | 81 | Not Known |
| 57 | Female | 180 | 102 | 108 | 90 | Not Known |
| 64 | Male   | 177 | 75  | 121 | 80 | No        |
| 61 | Male   | 165 | 55  | 118 | 69 | No        |
| 50 | Male   | 175 | 70  | 123 | 88 | No        |
| 43 | Male   | 176 | 95  | 132 | 68 | Yes       |
| 63 | Female | 171 | 68  | 134 | 73 | No        |

|    |        |     |     |     |    |           |
|----|--------|-----|-----|-----|----|-----------|
| 41 | Male   | 172 | 89  | 151 | 85 | Yes       |
| 48 | Female | 143 | 68  | 120 | 88 | Yes       |
| 66 | Female | 147 | 76  | 134 | 97 | Yes       |
| 51 | Female | 149 | 73  | 111 | 78 | Yes       |
| 76 | Female | 156 | 73  | 108 | 85 | Yes       |
| 53 | Male   | 156 | 55  | 135 | 66 | Not Known |
| 48 | Male   | 154 | 77  | 110 | 87 | Not Known |
| 52 | Male   | 152 | 50  | 112 | 75 | Yes       |
| 41 | Female | 153 | 80  | 110 | 78 | Not Known |
| 58 | Male   | 179 | 64  | 95  | 88 | Yes       |
| 37 | Female | 176 | 75  | 142 | 80 | Yes       |
| 58 | Female | 156 | 77  | 98  | 87 | No        |
| 64 | Female | 174 | 104 | 132 | 84 | Yes       |
| 66 | Female | 164 | 83  | 121 | 90 | No        |
| 42 | Female | 176 | 82  | 102 | 82 | No        |
| 55 | Female | 178 | 75  | 107 | 74 | No        |
| 45 | Male   | 174 | 75  | 101 | 80 | Yes       |
| 35 | Male   | 167 | 76  | 101 | 88 | No        |
| 67 | Male   | 168 | 72  | 120 | 85 | No        |
| 41 | Male   | 170 | 76  | 125 | 90 | Yes       |
| 44 | Male   | 180 | 105 | 110 | 81 | No        |
| 41 | Female | 159 | 52  | 134 | 78 | Yes       |
| 62 | Female | 173 | 90  | 148 | 99 | Yes       |
| 53 | Female | 156 | 65  | 141 | 88 | No        |
| 62 | Male   | 154 | 65  | 129 | 75 | Not Known |
| 62 | Male   | 158 | 60  | 130 | 91 | No        |
| 66 | Male   | 178 | 103 | 145 | 85 | Not Known |
| 38 | Male   | 159 | 75  | 134 | 74 | No        |
| 70 | Male   | 140 | 67  | 134 | 75 | Not Known |
| 46 | Male   | 158 | 55  | 128 | 88 | No        |
| 51 | Male   | 155 | 58  | 132 | 91 | Not Known |
| 39 | Male   | 145 | 68  | 120 | 80 | Yes       |
| 51 | Male   | 165 | 86  | 120 | 78 | Yes       |
| 66 | Female | 170 | 73  | 101 | 81 | Not Known |
| 47 | Male   | 168 | 60  | 142 | 80 | Not Known |
| 28 | Female | 165 | 67  | 120 | 69 | No        |
| 53 | Female | 174 | 70  | 140 | 91 | Yes       |
| 60 | Female | 174 | 70  | 120 | 88 | Yes       |
| 71 | Female | 172 | 106 | 104 | 90 | Not Known |
| 68 | Female | 134 | 40  | 142 | 88 | Not Known |
| 64 | Female | 165 | 55  | 121 | 81 | No        |
| 31 | Male   | 167 | 75  | 99  | 65 | Not Known |
| 34 | Male   | 165 | 80  | 118 | 68 | Yes       |
| 59 | Female | 179 | 85  | 120 | 88 | Yes       |
| 54 | Male   | 176 | 98  | 148 | 88 | No        |
| 59 | Male   | 171 | 88  | 119 | 82 | No        |
| 60 | Male   | 179 | 74  | 101 | 71 | Not Known |



|    |        |     |     |     |    |           |
|----|--------|-----|-----|-----|----|-----------|
| 52 | Female | 148 | 51  | 139 | 92 | Yes       |
| 59 | Female | 165 | 71  | 118 | 84 | Not Known |
| 74 | Male   | 171 | 60  | 105 | 81 | No        |
| 65 | Male   | 152 | 71  | 121 | 88 | Yes       |
| 52 | Female | 150 | 74  | 149 | 94 | No        |
| 54 | Female | 151 | 74  | 114 | 75 | No        |
| 49 | Male   | 145 | 55  | 114 | 73 | Yes       |
| 40 | Male   | 149 | 55  | 101 | 81 | No        |
| 31 | Female | 145 | 42  | 145 | 88 | No        |
| 52 | Male   | 148 | 72  | 135 | 78 | Not Known |
| 62 | Male   | 180 | 70  | 110 | 81 | Not Known |
| 69 | Female | 179 | 80  | 104 | 85 | Not Known |
| 49 | Male   | 156 | 78  | 119 | 71 | Not Known |
| 74 | Female | 169 | 99  | 152 | 92 | Yes       |
| 61 | Male   | 183 | 107 | 117 | 75 | Not Known |
| 59 | Female | 159 | 99  | 155 | 89 | No        |
| 67 | Female | 170 | 100 | 138 | 92 | Not Known |
| 56 | Male   | 182 | 98  | 101 | 66 | No        |
| 49 | Female | 145 | 50  | 117 | 77 | No        |
| 65 | Female | 156 | 70  | 123 | 90 | Not Known |
| 46 | Male   | 176 | 76  | 135 | 90 | Yes       |
| 44 | Male   | 181 | 76  | 101 | 84 | Yes       |
| 69 | Male   | 181 | 100 | 107 | 88 | Yes       |
| 64 | Male   | 154 | 93  | 123 | 82 | Not Known |
| 41 | Male   | 154 | 68  | 148 | 66 | No        |
| 51 | Female | 154 | 107 | 118 | 89 | No        |
| 64 | Female | 165 | 69  | 132 | 78 | Not Known |
| 62 | Female | 178 | 77  | 109 | 82 | No        |
| 54 | Male   | 178 | 86  | 142 | 92 | No        |
| 64 | Male   | 148 | 76  | 142 | 79 | Yes       |
| 62 | Female | 153 | 73  | 104 | 80 | Not Known |
| 42 | Female | 156 | 77  | 105 | 86 | Yes       |
| 56 | Female | 157 | 76  | 98  | 62 | Yes       |
| 54 | Male   | 180 | 65  | 121 | 71 | No        |
| 44 | Female | 159 | 75  | 145 | 90 | No        |
| 51 | Male   | 176 | 96  | 155 | 95 | Not Known |
| 39 | Male   | 171 | 68  | 118 | 65 | No        |
| 66 | Female | 172 | 90  | 152 | 80 | Not Known |
| 48 | Female | 149 | 54  | 101 | 85 | No        |
| 65 | Female | 156 | 52  | 132 | 85 | Not Known |
| 64 | Female | 145 | 75  | 152 | 75 | Yes       |
| 55 | Male   | 152 | 60  | 100 | 76 | Not Known |
| 51 | Female | 151 | 51  | 120 | 88 | No        |
| 41 | Female | 158 | 67  | 151 | 77 | No        |
| 68 | Male   | 181 | 102 | 121 | 68 | Yes       |
| 55 | Female | 181 | 100 | 99  | 69 | No        |
| 56 | Female | 168 | 70  | 95  | 61 | Yes       |

|    |        |     |     |     |    |           |
|----|--------|-----|-----|-----|----|-----------|
| 41 | Female | 182 | 101 | 111 | 78 | No        |
| 48 | Male   | 178 | 67  | 108 | 84 | No        |
| 61 | Female | 179 | 86  | 121 | 78 | Not Known |
| 67 | Female | 154 | 62  | 102 | 88 | Yes       |
| 56 | Male   | 178 | 85  | 152 | 95 | Not Known |
| 66 | Male   | 168 | 53  | 121 | 78 | No        |
| 50 | Male   | 180 | 79  | 142 | 78 | Yes       |
| 68 | Male   | 173 | 69  | 131 | 78 | Not Known |
| 37 | Male   | 156 | 78  | 148 | 89 | Not Known |
| 44 | Male   | 157 | 50  | 157 | 88 | No        |
| 52 | Female | 140 | 45  | 129 | 66 | No        |
| 42 | Male   | 152 | 71  | 108 | 80 | No        |
| 51 | Male   | 155 | 73  | 135 | 80 | Yes       |
| 43 | Female | 146 | 75  | 120 | 98 | No        |
| 43 | Male   | 165 | 75  | 140 | 80 | Not Known |
| 43 | Female | 153 | 49  | 150 | 90 | No        |
| 41 | Male   | 178 | 62  | 112 | 88 | Yes       |
| 62 | Female | 177 | 69  | 142 | 67 | Yes       |
| 61 | Female | 165 | 85  | 158 | 98 | Yes       |
| 48 | Male   | 167 | 88  | 114 | 80 | Yes       |
| 61 | Male   | 155 | 72  | 131 | 71 | Not Known |
| 51 | Female | 178 | 78  | 142 | 68 | Not Known |
| 55 | Female | 179 | 80  | 151 | 95 | Yes       |
| 77 | Female | 155 | 54  | 132 | 95 | No        |
| 44 | Female | 152 | 54  | 138 | 78 | No        |
| 44 | Male   | 150 | 65  | 101 | 64 | No        |
| 31 | Male   | 151 | 50  | 110 | 66 | Yes       |
| 69 | Male   | 169 | 65  | 108 | 84 | Not Known |
| 76 | Male   | 169 | 74  | 104 | 81 | Not Known |
| 68 | Female | 178 | 102 | 101 | 71 | Yes       |
| 67 | Female | 177 | 88  | 145 | 84 | Not Known |
| 41 | Female | 154 | 76  | 110 | 92 | No        |
| 43 | Female | 173 | 72  | 132 | 80 | No        |
| 51 | Male   | 182 | 67  | 132 | 88 | Yes       |
| 51 | Female | 176 | 77  | 123 | 92 | No        |
| 70 | Male   | 175 | 105 | 129 | 76 | Not Known |
| 67 | Female | 162 | 98  | 118 | 86 | No        |
| 50 | Male   | 162 | 56  | 142 | 69 | No        |
| 47 | Female | 162 | 74  | 131 | 93 | Yes       |
| 55 | Male   | 165 | 70  | 95  | 90 | Yes       |
| 43 | Male   | 176 | 61  | 131 | 74 | Yes       |
| 65 | Male   | 165 | 83  | 142 | 84 | Not Known |
| 67 | Female | 153 | 62  | 138 | 82 | Not Known |
| 35 | Female | 153 | 50  | 105 | 90 | No        |
| 76 | Male   | 181 | 75  | 102 | 82 | Not Known |
| 52 | Male   | 165 | 65  | 128 | 95 | Yes       |
| 77 | Female | 158 | 85  | 155 | 98 | Yes       |

|    |        |     |     |     |    |           |
|----|--------|-----|-----|-----|----|-----------|
| 56 | Female | 159 | 62  | 122 | 90 | No        |
| 45 | Female | 166 | 66  | 104 | 98 | No        |
| 32 | Male   | 176 | 85  | 120 | 80 | No        |
| 35 | Female | 147 | 45  | 108 | 95 | Yes       |
| 45 | Female | 154 | 56  | 144 | 99 | No        |
| 71 | Female | 153 | 74  | 105 | 80 | Yes       |
| 47 | Male   | 158 | 78  | 124 | 80 | No        |
| 35 | Male   | 182 | 110 | 112 | 83 | No        |
| 38 | Male   | 171 | 72  | 140 | 78 | Yes       |
| 65 | Female | 178 | 77  | 152 | 86 | Not Known |
| 71 | Male   | 179 | 71  | 112 | 88 | No        |
| 47 | Male   | 167 | 70  | 114 | 88 | Yes       |
| 42 | Female | 168 | 80  | 118 | 88 | No        |
| 50 | Female | 170 | 80  | 132 | 70 | Not Known |
| 68 | Female | 149 | 96  | 108 | 74 | No        |
| 46 | Male   | 162 | 78  | 132 | 92 | Not Known |
| 48 | Female | 157 | 56  | 145 | 87 | Yes       |
| 45 | Male   | 159 | 67  | 149 | 87 | No        |
| 34 | Male   | 140 | 45  | 99  | 66 | No        |
| 25 | Male   | 155 | 53  | 90  | 66 | No        |
| 52 | Male   | 145 | 48  | 111 | 80 | No        |
| 41 | Female | 146 | 43  | 134 | 80 | Yes       |
| 44 | Male   | 153 | 51  | 104 | 61 | Yes       |
| 65 | Male   | 165 | 88  | 149 | 82 | Not Known |
| 45 | Female | 177 | 81  | 121 | 78 | Not Known |
| 44 | Female | 165 | 71  | 107 | 62 | Not Known |
| 38 | Male   | 182 | 105 | 120 | 90 | No        |
| 44 | Male   | 155 | 77  | 118 | 63 | Yes       |
| 43 | Female | 176 | 98  | 142 | 80 | Yes       |
| 48 | Female | 178 | 99  | 121 | 80 | Not Known |
| 35 | Female | 175 | 98  | 140 | 98 | Yes       |
| 49 | Male   | 145 | 74  | 132 | 81 | No        |
| 48 | Male   | 150 | 55  | 120 | 66 | No        |
| 47 | Male   | 145 | 47  | 135 | 95 | No        |
| 45 | Female | 148 | 62  | 123 | 77 | Yes       |
| 74 | Female | 149 | 55  | 101 | 87 | No        |
| 41 | Male   | 156 | 60  | 141 | 82 | Yes       |
| 51 | Male   | 181 | 63  | 158 | 92 | No        |
| 38 | Female | 156 | 65  | 132 | 88 | Yes       |
| 41 | Female | 145 | 78  | 147 | 66 | No        |
| 49 | Female | 156 | 55  | 157 | 89 | No        |
| 43 | Female | 176 | 62  | 118 | 78 | No        |
| 44 | Male   | 176 | 108 | 147 | 88 | Not Known |
| 35 | Female | 165 | 68  | 120 | 95 | No        |

| Healthy Diet  | Physical Activity | Alcohol Consumption | Smoking      | SocioEconomicLevel |
|---------------|-------------------|---------------------|--------------|--------------------|
| Following     | No Exercise       | Non Alcoholic       | Regular      | Poor               |
| Not Following | Regular Exercise  | Non Alcoholic       | Occasionally | High Class         |
| Following     | No Exercise       | Occasionally        | Regular      | Poor               |
| Following     | Occasionally      | Occasionally        | Non Smoker   | Poor               |
| Occasionally  | Occasionally      | Non Alcoholic       | Regular      | Middle Class       |
| Not Following | Regular Exercise  | Non Alcoholic       | Regular      | High Class         |
| Occasionally  | No Exercise       | Non Alcoholic       | Occasionally | High Class         |
| Occasionally  | No Exercise       | Non Alcoholic       | Regular      | Poor               |
| Not Following | Regular Exercise  | Non Alcoholic       | Occasionally | Poor               |
| Occasionally  | Regular Exercise  | Non Alcoholic       | Regular      | Poor               |
| Occasionally  | No Exercise       | Non Alcoholic       | Non Smoker   | Middle Class       |
| Occasionally  | Regular Exercise  | Non Alcoholic       | Occasionally | High Class         |
| Occasionally  | No Exercise       | Non Alcoholic       | Regular      | High Class         |
| Occasionally  | No Exercise       | Occasionally        | Regular      | High Class         |
| Occasionally  | No Exercise       | Non Alcoholic       | Regular      | Poor               |
| Occasionally  | Regular Exercise  | Occasionally        | Occasionally | Poor               |
| Occasionally  | Regular Exercise  | Occasionally        | Regular      | Poor               |
| Occasionally  | No Exercise       | Occasionally        | Regular      | High Class         |
| Following     | Regular Exercise  | Occasionally        | Regular      | Poor               |
| Following     | No Exercise       | Non Alcoholic       | Non Smoker   | Poor               |
| Not Following | Regular Exercise  | Non Alcoholic       | Occasionally | High Class         |
| Following     | No Exercise       | Non Alcoholic       | Regular      | Middle Class       |
| Occasionally  | Regular Exercise  | Non Alcoholic       | Regular      | Middle Class       |
| Occasionally  | Regular Exercise  | Occasionally        | Occasionally | High Class         |
| Occasionally  | Regular Exercise  | Non Alcoholic       | Regular      | High Class         |
| Occasionally  | No Exercise       | Non Alcoholic       | Occasionally | Poor               |
| Occasionally  | No Exercise       | Non Alcoholic       | Regular      | Poor               |
| Occasionally  | Occasionally      | Non Alcoholic       | Regular      | Poor               |
| Occasionally  | No Exercise       | Non Alcoholic       | Occasionally | Middle Class       |
| Occasionally  | No Exercise       | Non Alcoholic       | Regular      | High Class         |
| Following     | No Exercise       | Occasionally        | Regular      | High Class         |
| Occasionally  | Occasionally      | Non Alcoholic       | Regular      | Middle Class       |
| Occasionally  | No Exercise       | Non Alcoholic       | Occasionally | Middle Class       |
| Occasionally  | Regular Exercise  | Non Alcoholic       | Regular      | Middle Class       |
| Occasionally  | No Exercise       | Non Alcoholic       | Regular      | High Class         |
| Not Following | No Exercise       | Non Alcoholic       | Regular      | Poor               |
| Occasionally  | Regular Exercise  | Non Alcoholic       | Regular      | Middle Class       |
| Not Following | No Exercise       | Non Alcoholic       | Occasionally | Poor               |
| Not Following | No Exercise       | Occasionally        | Non Smoker   | Poor               |
| Not Following | No Exercise       | Non Alcoholic       | Regular      | Poor               |
| Not Following | Occasionally      | Non Alcoholic       | Occasionally | Poor               |
| Following     | No Exercise       | Non Alcoholic       | Regular      | Poor               |
| Occasionally  | Regular Exercise  | Non Alcoholic       | Occasionally | High Class         |
| Occasionally  | Regular Exercise  | Non Alcoholic       | Regular      | Middle Class       |
| Occasionally  | No Exercise       | Non Alcoholic       | Regular      | High Class         |

|               |                  |               |              |              |
|---------------|------------------|---------------|--------------|--------------|
| Not Following | No Exercise      | Non Alcoholic | Occasionally | Middle Class |
| Occasionally  | Regular Exercise | Non Alcoholic | Regular      | High Class   |
| Following     | No Exercise      | Occasionally  | Regular      | Poor         |
| Not Following | Regular Exercise | Occasionally  | Regular      | Middle Class |
| Not Following | No Exercise      | Non Alcoholic | Occasionally | Poor         |
| Not Following | Regular Exercise | Non Alcoholic | Regular      | Middle Class |
| Not Following | Occasionally     | Non Alcoholic | Regular      | Poor         |
| Not Following | Regular Exercise | Occasionally  | Regular      | Poor         |
| Not Following | No Exercise      | Occasionally  | Regular      | Poor         |
| Occasionally  | Regular Exercise | Occasionally  | Non Smoker   | High Class   |
| Occasionally  | No Exercise      | Occasionally  | Regular      | High Class   |
| Not Following | Regular Exercise | Occasionally  | Regular      | High Class   |
| Occasionally  | Regular Exercise | Occasionally  | Occasionally | High Class   |
| Not Following | Regular Exercise | Non Alcoholic | Regular      | High Class   |
| Occasionally  | Occasionally     | Non Alcoholic | Occasionally | Middle Class |
| Not Following | Regular Exercise | Non Alcoholic | Regular      | Poor         |
| Occasionally  | Regular Exercise | Non Alcoholic | Regular      | High Class   |
| Not Following | No Exercise      | Non Alcoholic | Occasionally | High Class   |
| Occasionally  | No Exercise      | Non Alcoholic | Regular      | Middle Class |
| Not Following | No Exercise      | Non Alcoholic | Regular      | High Class   |
| Following     | Regular Exercise | Non Alcoholic | Regular      | High Class   |
| Occasionally  | Regular Exercise | Non Alcoholic | Occasionally | Poor         |
| Not Following | Regular Exercise | Non Alcoholic | Regular      | Poor         |
| Occasionally  | Regular Exercise | Non Alcoholic | Regular      | Middle Class |
| Occasionally  | Occasionally     | Non Alcoholic | Regular      | Middle Class |
| Not Following | Regular Exercise | Non Alcoholic | Regular      | Middle Class |
| Occasionally  | Regular Exercise | Non Alcoholic | Non Smoker   | Middle Class |
| Occasionally  | No Exercise      | Non Alcoholic | Regular      | Middle Class |
| Not Following | No Exercise      | Non Alcoholic | Regular      | High Class   |
| Following     | No Exercise      | Occasionally  | Occasionally | High Class   |
| Following     | Occasionally     | Non Alcoholic | Regular      | Middle Class |
| Occasionally  | No Exercise      | Non Alcoholic | Occasionally | Middle Class |
| Occasionally  | No Exercise      | Non Alcoholic | Regular      | High Class   |
| Occasionally  | Regular Exercise | Non Alcoholic | Regular      | Poor         |
| Occasionally  | No Exercise      | Non Alcoholic | Occasionally | Poor         |
| Occasionally  | No Exercise      | Non Alcoholic | Regular      | High Class   |
| Following     | No Exercise      | Non Alcoholic | Regular      | High Class   |
| Occasionally  | No Exercise      | Non Alcoholic | Regular      | Poor         |
| Occasionally  | Occasionally     | Non Alcoholic | Occasionally | Middle Class |
| Occasionally  | No Exercise      | Non Alcoholic | Regular      | Poor         |
| Following     | No Exercise      | Non Alcoholic | Regular      | Poor         |
| Following     | Occasionally     | Non Alcoholic | Regular      | Middle Class |
| Not Following | No Exercise      | Non Alcoholic | Non Smoker   | Poor         |
| Following     | No Exercise      | Occasionally  | Occasionally | Middle Class |
| Following     | No Exercise      | Non Alcoholic | Regular      | Middle Class |
| Not Following | Regular Exercise | Non Alcoholic | Regular      | Poor         |
| Not Following | Regular Exercise | Non Alcoholic | Occasionally | Middle Class |

|               |                  |               |              |              |
|---------------|------------------|---------------|--------------|--------------|
| Occasionally  | Occasionally     | Non Alcoholic | Regular      | Poor         |
| Occasionally  | Regular Exercise | Non Alcoholic | Occasionally | Poor         |
| Not Following | Regular Exercise | Non Alcoholic | Regular      | High Class   |
| Not Following | No Exercise      | Non Alcoholic | Regular      | Poor         |
| Occasionally  | Occasionally     | Non Alcoholic | Occasionally | High Class   |
| Not Following | Regular Exercise | Occasionally  | Regular      | High Class   |
| Not Following | No Exercise      | Non Alcoholic | Regular      | High Class   |
| Not Following | Regular Exercise | Non Alcoholic | Regular      | Middle Class |
| Not Following | No Exercise      | Non Alcoholic | Occasionally | Middle Class |
| Occasionally  | Regular Exercise | Non Alcoholic | Regular      | Middle Class |
| Not Following | No Exercise      | Non Alcoholic | Regular      | Middle Class |
| Occasionally  | Regular Exercise | Non Alcoholic | Regular      | Middle Class |
| Not Following | No Exercise      | Non Alcoholic | Regular      | Poor         |
| Not Following | No Exercise      | Non Alcoholic | Occasionally | Poor         |
| Occasionally  | No Exercise      | Non Alcoholic | Regular      | High Class   |
| Following     | Regular Exercise | Non Alcoholic | Regular      | Poor         |
| Following     | Regular Exercise | Non Alcoholic | Occasionally | Middle Class |
| Following     | Regular Exercise | Non Alcoholic | Non Smoker   | Middle Class |
| Not Following | Occasionally     | Occasionally  | Occasionally | Poor         |
| Occasionally  | No Exercise      | Non Alcoholic | Regular      | Poor         |
| Occasionally  | No Exercise      | Non Alcoholic | Regular      | High Class   |
| Following     | Occasionally     | Non Alcoholic | Occasionally | Poor         |
| Following     | No Exercise      | Non Alcoholic | Regular      | Poor         |
| Following     | No Exercise      | Non Alcoholic | Regular      | Poor         |
| Following     | Occasionally     | Non Alcoholic | Regular      | Middle Class |
| Occasionally  | No Exercise      | Non Alcoholic | Occasionally | High Class   |
| Occasionally  | Occasionally     | Non Alcoholic | Regular      | Poor         |
| Following     | No Exercise      | Non Alcoholic | Regular      | High Class   |
| Not Following | Regular Exercise | Alcoholic     | Regular      | Middle Class |
| Following     | Regular Exercise | Non Alcoholic | Non Smoker   | Poor         |
| Following     | Regular Exercise | Non Alcoholic | Occasionally | High Class   |
| Not Following | Regular Exercise | Occasionally  | Regular      | Poor         |
| Following     | No Exercise      | Non Alcoholic | Regular      | High Class   |
| Not Following | Regular Exercise | Non Alcoholic | Occasionally | Poor         |
| Following     | No Exercise      | Occasionally  | Regular      | High Class   |
| Occasionally  | Regular Exercise | Non Alcoholic | Occasionally | Poor         |
| Following     | No Exercise      | Non Alcoholic | Regular      | Middle Class |
| Occasionally  | Regular Exercise | Non Alcoholic | Regular      | Middle Class |
| Following     | No Exercise      | Non Alcoholic | Occasionally | Middle Class |
| Following     | Regular Exercise | Non Alcoholic | Regular      | Middle Class |
| Following     | No Exercise      | Non Alcoholic | Regular      | Middle Class |
| Following     | Regular Exercise | Non Alcoholic | Regular      | Poor         |
| Following     | No Exercise      | Non Alcoholic | Occasionally | High Class   |
| Occasionally  | No Exercise      | Non Alcoholic | Regular      | Middle Class |
| Occasionally  | Regular Exercise | Non Alcoholic | Regular      | High Class   |
| Following     | No Exercise      | Non Alcoholic | Regular      | Poor         |
| Occasionally  | Regular Exercise | Non Alcoholic | Regular      | High Class   |

|              |                  |               |              |              |
|--------------|------------------|---------------|--------------|--------------|
| Following    | Regular Exercise | Non Alcoholic | Occasionally | High Class   |
| Following    | Regular Exercise | Occasionally  | Regular      | High Class   |
| Occasionally | No Exercise      | Occasionally  | Regular      | Poor         |
| Following    | Regular Exercise | Occasionally  | Occasionally | High Class   |
| Occasionally | Regular Exercise | Alcoholic     | Regular      | Poor         |
| Following    | No Exercise      | Occasionally  | Occasionally | Poor         |
| Occasionally | Regular Exercise | Occasionally  | Regular      | High Class   |
| Following    | No Exercise      | Non Alcoholic | Regular      | Poor         |
| Following    | Regular Exercise | Alcoholic     | Occasionally | Poor         |
| Following    | Occasionally     | Alcoholic     | Regular      | Middle Class |
| Following    | Regular Exercise | Alcoholic     | Regular      | High Class   |
| Occasionally | No Exercise      | Non Alcoholic | Regular      | Middle Class |
| Following    | Regular Exercise | Non Alcoholic | Occasionally | Poor         |
| Following    | No Exercise      | Non Alcoholic | Regular      | Poor         |
| Following    | No Exercise      | Non Alcoholic | Non Smoker   | High Class   |
| Occasionally | No Exercise      | Non Alcoholic | Regular      | High Class   |
| Following    | Regular Exercise | Non Alcoholic | Regular      | High Class   |
| Occasionally | No Exercise      | Non Alcoholic | Occasionally | High Class   |
| Following    | No Exercise      | Non Alcoholic | Regular      | High Class   |
| Following    | No Exercise      | Non Alcoholic | Regular      | High Class   |
| Occasionally | Occasionally     | Occasionally  | Occasionally | High Class   |
| Occasionally | No Exercise      | Non Alcoholic | Regular      | Poor         |
| Occasionally | No Exercise      | Non Alcoholic | Occasionally | Poor         |
| Occasionally | Regular Exercise | Alcoholic     | Regular      | Poor         |
| Occasionally | Regular Exercise | Non Alcoholic | Regular      | High Class   |
| Occasionally | Regular Exercise | Alcoholic     | Occasionally | High Class   |
| Occasionally | No Exercise      | Non Alcoholic | Regular      | Poor         |
| Occasionally | Regular Exercise | Non Alcoholic | Regular      | Poor         |
| Occasionally | No Exercise      | Non Alcoholic | Regular      | High Class   |
| Occasionally | Regular Exercise | Non Alcoholic | Non Smoker   | Poor         |
| Occasionally | Regular Exercise | Non Alcoholic | Regular      | High Class   |
| Following    | Regular Exercise | Non Alcoholic | Regular      | Poor         |
| Following    | Regular Exercise | Non Alcoholic | Non Smoker   | Poor         |
| Occasionally | Regular Exercise | Non Alcoholic | Regular      | High Class   |
| Occasionally | No Exercise      | Occasionally  | Occasionally | Middle Class |
| Occasionally | Regular Exercise | Non Alcoholic | Regular      | Poor         |
| Occasionally | No Exercise      | Non Alcoholic | Regular      | High Class   |
| Occasionally | Regular Exercise | Alcoholic     | Occasionally | High Class   |
| Following    | Regular Exercise | Non Alcoholic | Regular      | Poor         |
| Occasionally | No Exercise      | Alcoholic     | Occasionally | High Class   |
| Following    | Regular Exercise | Occasionally  | Regular      | Poor         |
| Following    | No Exercise      | Occasionally  | Non Smoker   | Poor         |
| Following    | Regular Exercise | Non Alcoholic | Occasionally | Poor         |
| Occasionally | Regular Exercise | Alcoholic     | Regular      | Poor         |
| Following    | Regular Exercise | Non Alcoholic | Regular      | Middle Class |
| Following    | No Exercise      | Non Alcoholic | Regular      | Middle Class |
| Occasionally | No Exercise      | Alcoholic     | Occasionally | Poor         |

|                        |                  |               |              |              |
|------------------------|------------------|---------------|--------------|--------------|
| Occasionally Following | No Exercise      | Alcoholic     | Regular      | High Class   |
| Following              | Regular Exercise | Non Alcoholic | Regular      | High Class   |
| Following              | Regular Exercise | Non Alcoholic | Regular      | Middle Class |
| Following              | Regular Exercise | Non Alcoholic | Regular      | High Class   |
| Occasionally Following | No Exercise      | Non Alcoholic | Occasionally | Poor         |
| Following              | No Exercise      | Non Alcoholic | Regular      | Poor         |
| Following              | Regular Exercise | Non Alcoholic | Regular      | Poor         |
| Following              | No Exercise      | Alcoholic     | Occasionally | Poor         |
| Occasionally           | Regular Exercise | Occasionally  | Regular      | Poor         |
| Not Following          | Regular Exercise | Non Alcoholic | Non Smoker   | High Class   |
| Occasionally           | Regular Exercise | Non Alcoholic | Regular      | Poor         |
| Occasionally           | No Exercise      | Alcoholic     | Regular      | Poor         |
| Occasionally           | No Exercise      | Non Alcoholic | Occasionally | Middle Class |
| Occasionally           | Occasionally     | Non Alcoholic | Regular      | Middle Class |
| Not Following          | No Exercise      | Alcoholic     | Regular      | High Class   |
| Occasionally           | Regular Exercise | Non Alcoholic | Regular      | Poor         |
| Not Following          | Regular Exercise | Non Alcoholic | Occasionally | Middle Class |
| Not Following          | Regular Exercise | Occasionally  | Regular      | High Class   |
| Occasionally           | No Exercise      | Non Alcoholic | Regular      | Poor         |
| Occasionally           | Occasionally     | Occasionally  | Regular      | High Class   |
| Not Following          | Regular Exercise | Occasionally  | Regular      | Middle Class |
| Occasionally           | Regular Exercise | Non Alcoholic | Occasionally | Middle Class |
| Occasionally           | No Exercise      | Non Alcoholic | Regular      | Middle Class |
| Occasionally           | Regular Exercise | Non Alcoholic | Regular      | High Class   |
| Not Following          | No Exercise      | Non Alcoholic | Occasionally | Poor         |
| Not Following          | Regular Exercise | Non Alcoholic | Regular      | High Class   |
| Not Following          | Regular Exercise | Non Alcoholic | Occasionally | High Class   |
| Occasionally           | No Exercise      | Non Alcoholic | Regular      | Middle Class |
| Occasionally           | Regular Exercise | Non Alcoholic | Regular      | High Class   |
| Occasionally           | No Exercise      | Non Alcoholic | Occasionally | High Class   |
| Occasionally           | Regular Exercise | Non Alcoholic | Regular      | High Class   |
| Occasionally           | No Exercise      | Non Alcoholic | Regular      | Middle Class |
| Not Following          | No Exercise      | Non Alcoholic | Regular      | High Class   |
| Occasionally           | Occasionally     | Non Alcoholic | Occasionally | Poor         |
| Not Following          | No Exercise      | Non Alcoholic | Regular      | Poor         |
| Not Following          | Regular Exercise | Non Alcoholic | Non Smoker   | Poor         |
| Occasionally           | Regular Exercise | Non Alcoholic | Regular      | High Class   |
| Occasionally           | Regular Exercise | Non Alcoholic | Regular      | Poor         |
| Following              | Regular Exercise | Non Alcoholic | Occasionally | Poor         |
| Occasionally           | No Exercise      | Non Alcoholic | Regular      | High Class   |
| Not Following          | No Exercise      | Alcoholic     | Non Smoker   | High Class   |
| Following              | Regular Exercise | Alcoholic     | Occasionally | Middle Class |
| Following              | No Exercise      | Alcoholic     | Regular      | High Class   |
| Not Following          | Regular Exercise | Occasionally  | Occasionally | High Class   |
| Following              | No Exercise      | Non Alcoholic | Regular      | Poor         |
| Not Following          | Regular Exercise | Non Alcoholic | Regular      | High Class   |
| Not Following          | Regular Exercise | Occasionally  | Occasionally | Middle Class |



|               |                  |               |              |              |
|---------------|------------------|---------------|--------------|--------------|
| Following     | Regular Exercise | Non Alcoholic | Regular      | High Class   |
| Not Following | No Exercise      | Non Alcoholic | Regular      | High Class   |
| Following     | Regular Exercise | Occasionally  | Regular      | Poor         |
| Following     | No Exercise      | Non Alcoholic | Occasionally | High Class   |
| Not Following | Regular Exercise | Non Alcoholic | Regular      | High Class   |
| Not Following | Regular Exercise | Non Alcoholic | Regular      | High Class   |
| Not Following | Regular Exercise | Non Alcoholic | Regular      | High Class   |
| Not Following | Regular Exercise | Non Alcoholic | Regular      | High Class   |
| Following     | No Exercise      | Non Alcoholic | Occasionally | Middle Class |
| Following     | Regular Exercise | Non Alcoholic | Regular      | Middle Class |
| Not Following | No Exercise      | Non Alcoholic | Occasionally | High Class   |
| Not Following | Regular Exercise | Non Alcoholic | Regular      | High Class   |
| Not Following | Regular Exercise | Non Alcoholic | Regular      | High Class   |
| Not Following | Regular Exercise | Non Alcoholic | Regular      | High Class   |
| Not Following | Regular Exercise | Alcoholic     | Occasionally | High Class   |
| Not Following | Regular Exercise | Non Alcoholic | Regular      | Poor         |
| Not Following | Regular Exercise | Occasionally  | Regular      | High Class   |
| Occasionally  | No Exercise      | Occasionally  | Regular      | Middle Class |
| Occasionally  | Regular Exercise | Non Alcoholic | Occasionally | Poor         |
| Occasionally  | Regular Exercise | Non Alcoholic | Non Smoker   | Poor         |
| Not Following | Regular Exercise | Non Alcoholic | Regular      | Poor         |
| Not Following | No Exercise      | Non Alcoholic | Regular      | Poor         |
| Not Following | Regular Exercise | Non Alcoholic | Regular      | Middle Class |
| Not Following | Regular Exercise | Non Alcoholic | Occasionally | Poor         |
| Occasionally  | Regular Exercise | Non Alcoholic | Regular      | High Class   |
| Occasionally  | Occasionally     | Non Alcoholic | Regular      | High Class   |
| Occasionally  | Regular Exercise | Occasionally  | Non Smoker   | Middle Class |
| Occasionally  | Regular Exercise | Non Alcoholic | Regular      | Middle Class |
| Occasionally  | Occasionally     | Non Alcoholic | Occasionally | Middle Class |
| Occasionally  | Regular Exercise | Non Alcoholic | Regular      | Middle Class |
| Not Following | Regular Exercise | Non Alcoholic | Regular      | Middle Class |
| Not Following | No Exercise      | Non Alcoholic | Occasionally | High Class   |
| Occasionally  | No Exercise      | Alcoholic     | Regular      | Middle Class |
| Not Following | Regular Exercise | Non Alcoholic | Regular      | Poor         |
| Not Following | Regular Exercise | Non Alcoholic | Regular      | High Class   |
| Occasionally  | Regular Exercise | Non Alcoholic | Occasionally | Poor         |
| Not Following | No Exercise      | Non Alcoholic | Regular      | Middle Class |
| Not Following | No Exercise      | Non Alcoholic | Regular      | High Class   |
| Occasionally  | Regular Exercise | Non Alcoholic | Regular      | Middle Class |
| Occasionally  | Regular Exercise | Occasionally  | Regular      | Poor         |
| Occasionally  | No Exercise      | Non Alcoholic | Occasionally | Poor         |
| Occasionally  | Regular Exercise | Non Alcoholic | Regular      | Middle Class |
| Occasionally  | No Exercise      | Non Alcoholic | Regular      | Middle Class |
| Occasionally  | Regular Exercise | Occasionally  | Occasionally | Middle Class |
| Not Following | No Exercise      | Alcoholic     | Regular      | High Class   |
| Not Following | Regular Exercise | Alcoholic     | Occasionally | High Class   |
| Not Following | No Exercise      | Non Alcoholic | Regular      | High Class   |
| Occasionally  | Regular Exercise | Non Alcoholic | Regular      | Middle Class |

|               |                  |               |              |              |
|---------------|------------------|---------------|--------------|--------------|
| Occasionally  | No Exercise      | Alcoholic     | Occasionally | Middle Class |
| Occasionally  | Regular Exercise | Occasionally  | Regular      | Middle Class |
| Not Following | No Exercise      | Occasionally  | Regular      | Middle Class |
| Occasionally  | Regular Exercise | Non Alcoholic | Non Smoker   | Poor         |
| Occasionally  | No Exercise      | Occasionally  | Occasionally | Poor         |
| Occasionally  | Occasionally     | Occasionally  | Regular      | Poor         |
| Occasionally  | Regular Exercise | Non Alcoholic | Regular      | High Class   |
| Not Following | Regular Exercise | Non Alcoholic | Regular      | High Class   |
| Not Following | Occasionally     | Non Alcoholic | Regular      | High Class   |
| Not Following | Regular Exercise | Non Alcoholic | Occasionally | High Class   |
| Not Following | Regular Exercise | Non Alcoholic | Regular      | Middle Class |
| Not Following | Regular Exercise | Occasionally  | Regular      | High Class   |
| Not Following | Regular Exercise | Non Alcoholic | Occasionally | Middle Class |
| Not Following | No Exercise      | Non Alcoholic | Regular      | High Class   |
| Not Following | Regular Exercise | Non Alcoholic | Occasionally | Middle Class |
| Not Following | Occasionally     | Non Alcoholic | Regular      | High Class   |
| Not Following | Regular Exercise | Non Alcoholic | Regular      | Poor         |
| Not Following | No Exercise      | Non Alcoholic | Occasionally | Poor         |
| Not Following | Regular Exercise | Non Alcoholic | Regular      | Middle Class |
| Not Following | Regular Exercise | Non Alcoholic | Regular      | Middle Class |
| Not Following | Occasionally     | Occasionally  | Regular      | Middle Class |
| Not Following | Regular Exercise | Non Alcoholic | Non Smoker   | Middle Class |
| Not Following | Regular Exercise | Alcoholic     | Regular      | High Class   |
| Not Following | Regular Exercise | Non Alcoholic | Regular      | High Class   |
| Not Following | No Exercise      | Non Alcoholic | Regular      | High Class   |
| Not Following | Regular Exercise | Non Alcoholic | Regular      | High Class   |
| Not Following | Occasionally     | Non Alcoholic | Occasionally | High Class   |
| Not Following | Regular Exercise | Non Alcoholic | Regular      | Middle Class |
| Occasionally  | Occasionally     | Alcoholic     | Occasionally | Poor         |
| Not Following | Occasionally     | Non Alcoholic | Occasionally | Middle Class |
| Not Following | No Exercise      | Occasionally  | Regular      | Middle Class |
| Following     | Regular Exercise | Occasionally  | Occasionally | High Class   |
| Following     | Regular Exercise | Occasionally  | Occasionally | Poor         |
| Following     | Regular Exercise | Non Alcoholic | Regular      | Middle Class |
| Not Following | Occasionally     | Occasionally  | Occasionally | High Class   |
| Occasionally  | Regular Exercise | Occasionally  | Regular      | Middle Class |
| Not Following | Occasionally     | Non Alcoholic | Regular      | High Class   |
| Not Following | No Exercise      | Non Alcoholic | Non Smoker   | Middle Class |
| Following     | Regular Exercise | Non Alcoholic | Non Smoker   | High Class   |
| Following     | Regular Exercise | Non Alcoholic | Occasionally | Middle Class |
| Following     | Regular Exercise | Non Alcoholic | Non Smoker   | High Class   |
| Following     | Regular Exercise | Non Alcoholic | Occasionally | Poor         |
| Following     | Regular Exercise | Occasionally  | Occasionally | Poor         |
| Occasionally  | No Exercise      | Non Alcoholic | Regular      | Poor         |
| Occasionally  | No Exercise      | Non Alcoholic | Regular      | Poor         |
| Occasionally  | No Exercise      | Non Alcoholic | Regular      | Middle Class |
| Following     | Occasionally     | Alcoholic     | Regular      | Middle Class |

|               |                  |               |              |              |
|---------------|------------------|---------------|--------------|--------------|
| Following     | No Exercise      | Non Alcoholic | Regular      | High Class   |
| Occasionally  | Regular Exercise | Occasionally  | Regular      | High Class   |
| Occasionally  | Occasionally     | Alcoholic     | Regular      | High Class   |
| Occasionally  | Occasionally     | Occasionally  | Regular      | Middle Class |
| Occasionally  | Regular Exercise | Non Alcoholic | Occasionally | Middle Class |
| Following     | Occasionally     | Alcoholic     | Regular      | Middle Class |
| Occasionally  | Regular Exercise | Occasionally  | Regular      | High Class   |
| Occasionally  | Regular Exercise | Non Alcoholic | Occasionally | High Class   |
| Occasionally  | Regular Exercise | Alcoholic     | Regular      | Poor         |
| Occasionally  | Regular Exercise | Non Alcoholic | Occasionally | Poor         |
| Occasionally  | Occasionally     | Occasionally  | Occasionally | Poor         |
| Occasionally  | No Exercise      | Non Alcoholic | Non Smoker   | High Class   |
| Occasionally  | Regular Exercise | Non Alcoholic | Occasionally | High Class   |
| Following     | Regular Exercise | Occasionally  | Regular      | High Class   |
| Following     | No Exercise      | Non Alcoholic | Regular      | Middle Class |
| Occasionally  | No Exercise      | Alcoholic     | Regular      | Middle Class |
| Following     | Regular Exercise | Non Alcoholic | Occasionally | Middle Class |
| Following     | Regular Exercise | Non Alcoholic | Non Smoker   | Middle Class |
| Following     | Regular Exercise | Non Alcoholic | Non Smoker   | Poor         |
| Occasionally  | No Exercise      | Alcoholic     | Regular      | Poor         |
| Following     | Regular Exercise | Non Alcoholic | Regular      | High Class   |
| Occasionally  | No Exercise      | Non Alcoholic | Occasionally | High Class   |
| Occasionally  | No Exercise      | Non Alcoholic | Regular      | High Class   |
| Occasionally  | Regular Exercise | Occasionally  | Regular      | Middle Class |
| Occasionally  | Regular Exercise | Non Alcoholic | Occasionally | Middle Class |
| Following     | Regular Exercise | Non Alcoholic | Non Smoker   | Middle Class |
| Occasionally  | No Exercise      | Non Alcoholic | Non Smoker   | Middle Class |
| Occasionally  | No Exercise      | Non Alcoholic | Non Smoker   | Middle Class |
| Occasionally  | Occasionally     | Alcoholic     | Regular      | Poor         |
| Following     | Occasionally     | Non Alcoholic | Non Smoker   | Poor         |
| Occasionally  | No Exercise      | Alcoholic     | Regular      | Poor         |
| Following     | Regular Exercise | Alcoholic     | Regular      | Poor         |
| Occasionally  | Occasionally     | Occasionally  | Occasionally | Poor         |
| Occasionally  | No Exercise      | Alcoholic     | Regular      | Middle Class |
| Not Following | Regular Exercise | Alcoholic     | Occasionally | Middle Class |
| Not Following | Regular Exercise | Non Alcoholic | Non Smoker   | Middle Class |
| Occasionally  | No Exercise      | Occasionally  | Non Smoker   | Middle Class |
| Occasionally  | No Exercise      | Alcoholic     | Regular      | Middle Class |
| Occasionally  | Regular Exercise | Occasionally  | Regular      | Middle Class |
| Not Following | No Exercise      | Occasionally  | Non Smoker   | High Class   |
| Not Following | No Exercise      | Non Alcoholic | Non Smoker   | High Class   |
| Not Following | No Exercise      | Alcoholic     | Occasionally | High Class   |
| Occasionally  | Occasionally     | Occasionally  | Occasionally | Poor         |
| Following     | Regular Exercise | Non Alcoholic | Occasionally | High Class   |
| Occasionally  | Regular Exercise | Alcoholic     | Regular      | Poor         |
| Occasionally  | Regular Exercise | Non Alcoholic | Non Smoker   | Poor         |
| Occasionally  | Regular Exercise | Non Alcoholic | Occasionally | Middle Class |

|               |                  |               |              |              |
|---------------|------------------|---------------|--------------|--------------|
| Occasionally  | Regular Exercise | Occasionally  | Regular      | High Class   |
| Not Following | Occasionally     | Non Alcoholic | Occasionally | High Class   |
| Not Following | Regular Exercise | Non Alcoholic | Regular      | Middle Class |
| Following     | Regular Exercise | Non Alcoholic | Non Smoker   | High Class   |
| Not Following | Regular Exercise | Alcoholic     | Regular      | High Class   |
| Following     | Regular Exercise | Non Alcoholic | Non Smoker   | High Class   |
| Not Following | Regular Exercise | Non Alcoholic | Non Smoker   | Middle Class |
| Occasionally  | Occasionally     | Occasionally  | Occasionally | High Class   |
| Occasionally  | Regular Exercise | Alcoholic     | Regular      | Poor         |
| Not Following | Regular Exercise | Occasionally  | Non Smoker   | High Class   |
| Occasionally  | Regular Exercise | Alcoholic     | Regular      | Poor         |
| Following     | Regular Exercise | Non Alcoholic | Regular      | Poor         |
| Following     | Regular Exercise | Non Alcoholic | Occasionally | High Class   |
| Following     | Regular Exercise | Alcoholic     | Regular      | Poor         |
| Following     | Regular Exercise | Non Alcoholic | Regular      | Poor         |
| Not Following | Regular Exercise | Non Alcoholic | Occasionally | High Class   |
| Following     | Regular Exercise | Occasionally  | Regular      | Middle Class |
| Not Following | Regular Exercise | Occasionally  | Regular      | High Class   |
| Not Following | Regular Exercise | Non Alcoholic | Regular      | Middle Class |
| Following     | Regular Exercise | Non Alcoholic | Regular      | Middle Class |
| Occasionally  | Occasionally     | Alcoholic     | Occasionally | High Class   |
| Occasionally  | Regular Exercise | Non Alcoholic | Non Smoker   | High Class   |
| Following     | Regular Exercise | Occasionally  | Regular      | Poor         |
| Following     | Regular Exercise | Non Alcoholic | Non Smoker   | Poor         |
| Following     | Occasionally     | Occasionally  | Occasionally | Poor         |
| Occasionally  | Regular Exercise | Occasionally  | Regular      | Middle Class |
| Occasionally  | Occasionally     | Alcoholic     | Occasionally | High Class   |
| Occasionally  | No Exercise      | Non Alcoholic | Non Smoker   | High Class   |
| Following     | Regular Exercise | Non Alcoholic | Regular      | High Class   |
| Not Following | No Exercise      | Alcoholic     | Occasionally | Poor         |
| Not Following | Occasionally     | Occasionally  | Regular      | Poor         |
| Occasionally  | Occasionally     | Non Alcoholic | Non Smoker   | Poor         |
| Not Following | Regular Exercise | Alcoholic     | Non Smoker   | High Class   |
| Not Following | Regular Exercise | Occasionally  | Non Smoker   | Poor         |
| Occasionally  | Occasionally     | Occasionally  | Occasionally | Poor         |
| Following     | Regular Exercise | Alcoholic     | Regular      | High Class   |
| Following     | Regular Exercise | Non Alcoholic | Occasionally | Middle Class |
| Occasionally  | No Exercise      | Alcoholic     | Non Smoker   | Middle Class |
| Following     | No Exercise      | Alcoholic     | Regular      | High Class   |
| Not Following | Occasionally     | Occasionally  | Occasionally | High Class   |
| Occasionally  | Occasionally     | Non Alcoholic | Regular      | Poor         |
| Occasionally  | Occasionally     | Non Alcoholic | Occasionally | Poor         |
| Following     | Regular Exercise | Alcoholic     | Regular      | Poor         |
| Following     | No Exercise      | Occasionally  | Non Smoker   | Middle Class |
| Following     | Regular Exercise | Alcoholic     | Occasionally | High Class   |
| Not Following | Occasionally     | Occasionally  | Regular      | High Class   |
| Occasionally  | No Exercise      | Non Alcoholic | Regular      | Middle Class |

|                        |                               |                        |              |              |
|------------------------|-------------------------------|------------------------|--------------|--------------|
| Occasionally Following | Occasionally Regular Exercise | Occasionally Alcoholic | Regular      | Middle Class |
| Following              | No Exercise                   | Alcoholic              | Regular      | Middle Class |
| Following              | Occasionally                  | Occasionally           | Non Smoker   | High Class   |
| Following              | Occasionally                  | Occasionally           | Occasionally | Poor         |
| Occasionally Following | Occasionally                  | Occasionally           | Non Smoker   | Middle Class |
| Following              | Occasionally                  | Alcoholic              | Occasionally | Poor         |
| Following              | Regular Exercise              | Non Alcoholic          | Regular      | Poor         |
| Occasionally           | Regular Exercise              | Alcoholic              | Occasionally | Poor         |
| Occasionally           | Regular Exercise              | Non Alcoholic          | Non Smoker   | Poor         |
| Occasionally           | Regular Exercise              | Alcoholic              | Occasionally | High Class   |
| Following              | Regular Exercise              | Occasionally           | Regular      | Middle Class |
| Following              | Regular Exercise              | Non Alcoholic          | Non Smoker   | High Class   |
| Following              | Occasionally                  | Alcoholic              | Occasionally | Middle Class |
| Occasionally           | Regular Exercise              | Occasionally           | Non Smoker   | High Class   |
| Not Following          | No Exercise                   | Occasionally           | Regular      | Poor         |
| Following              | Occasionally                  | Occasionally           | Occasionally | Middle Class |
| Not Following          | Regular Exercise              | Occasionally           | Non Smoker   | Poor         |
| Not Following          | Regular Exercise              | Occasionally           | Occasionally | Middle Class |
| Following              | Regular Exercise              | Non Alcoholic          | Non Smoker   | Poor         |
| Following              | Regular Exercise              | Non Alcoholic          | Occasionally | Poor         |
| Following              | Regular Exercise              | Occasionally           | Occasionally | Poor         |
| Occasionally           | Occasionally                  | Occasionally           | Non Smoker   | High Class   |
| Following              | Regular Exercise              | Alcoholic              | Regular      | High Class   |
| Occasionally           | Regular Exercise              | Occasionally           | Occasionally | High Class   |
| Not Following          | Occasionally                  | Alcoholic              | Regular      | High Class   |
| Following              | Occasionally                  | Occasionally           | Occasionally | High Class   |
| Following              | Occasionally                  | Non Alcoholic          | Regular      | Middle Class |
| Following              | Regular Exercise              | Alcoholic              | Occasionally | Poor         |
| Following              | Regular Exercise              | Non Alcoholic          | Non Smoker   | High Class   |
| Not Following          | Regular Exercise              | Occasionally           | Regular      | High Class   |
| Following              | Occasionally                  | Occasionally           | Regular      | Middle Class |
| Following              | Occasionally                  | Non Alcoholic          | Occasionally | High Class   |
| Following              | Regular Exercise              | Alcoholic              | Regular      | High Class   |
| Occasionally           | Occasionally                  | Occasionally           | Occasionally | Poor         |
| Not Following          | Regular Exercise              | Alcoholic              | Regular      | Poor         |
| Occasionally           | No Exercise                   | Occasionally           | Regular      | Middle Class |
| Following              | Occasionally                  | Alcoholic              | Regular      | Middle Class |
| Not Following          | Regular Exercise              | Alcoholic              | Regular      | Middle Class |
| Occasionally           | No Exercise                   | Non Alcoholic          | Regular      | Middle Class |
| Occasionally           | Regular Exercise              | Non Alcoholic          | Regular      | Middle Class |
| Occasionally           | Regular Exercise              | Non Alcoholic          | Regular      | High Class   |
| Following              | No Exercise                   | Alcoholic              | Occasionally | High Class   |
| Not Following          | Occasionally                  | Alcoholic              | Regular      | Middle Class |
| Following              | Regular Exercise              | Non Alcoholic          | Occasionally | Middle Class |
| Following              | Regular Exercise              | Non Alcoholic          | Non Smoker   | High Class   |
| Following              | Regular Exercise              | Non Alcoholic          | Non Smoker   | Poor         |

|                        |                  |               |              |              |
|------------------------|------------------|---------------|--------------|--------------|
| Occasionally Following | Regular Exercise | Occasionally  | Regular      | Poor         |
| Following              | Occasionally     | Occasionally  | Regular      | High Class   |
| Following              | Regular Exercise | Non Alcoholic | Non Smoker   | High Class   |
| Occasionally Following | Occasionally     | Occasionally  | Occasionally | Poor         |
| Following              | Regular Exercise | Non Alcoholic | Non Smoker   | Middle Class |
| Not Following          | No Exercise      | Alcoholic     | Non Smoker   | Poor         |
| Following              | Regular Exercise | Alcoholic     | Regular      | Poor         |
| Not Following          | Regular Exercise | Occasionally  | Regular      | Middle Class |
| Not Following          | Regular Exercise | Occasionally  | Regular      | Poor         |
| Not Following          | Occasionally     | Occasionally  | Occasionally | Middle Class |
| Following              | Regular Exercise | Alcoholic     | Regular      | Middle Class |
| Following              | No Exercise      | Occasionally  | Occasionally | Poor         |
| Following              | Regular Exercise | Occasionally  | Regular      | Middle Class |
| Following              | Regular Exercise | Occasionally  | Non Smoker   | Poor         |
| Following              | Occasionally     | Non Alcoholic | Non Smoker   | Poor         |
| Following              | Regular Exercise | Occasionally  | Occasionally | High Class   |
| Following              | Regular Exercise | Non Alcoholic | Regular      | Poor         |
| Occasionally           | Occasionally     | Alcoholic     | Regular      | High Class   |
| Not Following          | No Exercise      | Non Alcoholic | Regular      | High Class   |
| Occasionally           | Occasionally     | Non Alcoholic | Non Smoker   | High Class   |
| Not Following          | Regular Exercise | Occasionally  | Occasionally | Middle Class |
| Following              | Regular Exercise | Occasionally  | Regular      | Middle Class |
| Occasionally           | Occasionally     | Occasionally  | Regular      | Middle Class |
| Not Following          | No Exercise      | Non Alcoholic | Non Smoker   | Middle Class |
| Occasionally           | Regular Exercise | Non Alcoholic | Occasionally | Middle Class |
| Following              | Regular Exercise | Non Alcoholic | Non Smoker   | Poor         |
| Occasionally           | Occasionally     | Occasionally  | Occasionally | Poor         |
| Occasionally           | Occasionally     | Occasionally  | Occasionally | High Class   |
| Following              | No Exercise      | Occasionally  | Regular      | Poor         |
| Not Following          | No Exercise      | Alcoholic     | Regular      | Middle Class |
| Not Following          | Regular Exercise | Occasionally  | Regular      | Middle Class |
| Following              | Regular Exercise | Non Alcoholic | Regular      | Poor         |
| Not Following          | No Exercise      | Occasionally  | Occasionally | Poor         |
| Following              | Regular Exercise | Non Alcoholic | Non Smoker   | High Class   |
| Following              | Regular Exercise | Alcoholic     | Non Smoker   | Poor         |
| Not Following          | Occasionally     | Alcoholic     | Regular      | Poor         |
| Not Following          | Regular Exercise | Occasionally  | Non Smoker   | Poor         |
| Following              | Regular Exercise | Occasionally  | Non Smoker   | Middle Class |
| Following              | Regular Exercise | Non Alcoholic | Regular      | High Class   |
| Following              | Occasionally     | Occasionally  | Non Smoker   | Poor         |
| Not Following          | No Exercise      | Alcoholic     | Occasionally | High Class   |
| Following              | Occasionally     | Alcoholic     | Regular      | Middle Class |
| Not Following          | Regular Exercise | Alcoholic     | Regular      | Poor         |
| Following              | Regular Exercise | Non Alcoholic | Regular      | High Class   |
| Following              | No Exercise      | Non Alcoholic | Occasionally | Poor         |
| Occasionally           | No Exercise      | Non Alcoholic | Non Smoker   | High Class   |
| Occasionally           | Regular Exercise | Alcoholic     | Non Smoker   | Poor         |

|               |                  |               |              |              |
|---------------|------------------|---------------|--------------|--------------|
| Not Following | Occasionally     | Occasionally  | Regular      | High Class   |
| Not Following | Occasionally     | Non Alcoholic | Regular      | Poor         |
| Occasionally  | Regular Exercise | Non Alcoholic | Regular      | Middle Class |
| Not Following | No Exercise      | Alcoholic     | Regular      | Middle Class |
| Occasionally  | Regular Exercise | Occasionally  | Occasionally | Middle Class |
| Occasionally  | Regular Exercise | Non Alcoholic | Non Smoker   | Middle Class |
| Following     | Regular Exercise | Non Alcoholic | Non Smoker   | Middle Class |
| Occasionally  | No Exercise      | Occasionally  | Non Smoker   | Poor         |
| Occasionally  | Regular Exercise | Alcoholic     | Regular      | High Class   |
| Following     | Regular Exercise | Non Alcoholic | Occasionally | Middle Class |
| Following     | Occasionally     | Occasionally  | Occasionally | High Class   |
| Following     | Regular Exercise | Non Alcoholic | Occasionally | Poor         |
| Following     | No Exercise      | Alcoholic     | Occasionally | High Class   |
| Occasionally  | No Exercise      | Alcoholic     | Occasionally | High Class   |
| Occasionally  | No Exercise      | Alcoholic     | Regular      | High Class   |
| Not Following | Occasionally     | Non Alcoholic | Occasionally | Poor         |
| Occasionally  | Occasionally     | Alcoholic     | Regular      | High Class   |
| Not Following | No Exercise      | Alcoholic     | Regular      | Poor         |
| Following     | Occasionally     | Non Alcoholic | Regular      | Poor         |
| Not Following | Occasionally     | Alcoholic     | Regular      | High Class   |
| Not Following | Occasionally     | Non Alcoholic | Regular      | Poor         |
| Not Following | No Exercise      | Occasionally  | Regular      | Poor         |
| Following     | Occasionally     | Non Alcoholic | Regular      | Middle Class |
| Occasionally  | No Exercise      | Alcoholic     | Non Smoker   | High Class   |
| Occasionally  | Occasionally     | Alcoholic     | Regular      | Middle Class |
| Occasionally  | Occasionally     | Occasionally  | Occasionally | Poor         |
| Occasionally  | No Exercise      | Occasionally  | Regular      | Poor         |
| Not Following | Occasionally     | Non Alcoholic | Regular      | High Class   |
| Following     | Regular Exercise | Alcoholic     | Occasionally | High Class   |
| Following     | Regular Exercise | Occasionally  | Occasionally | High Class   |
| Following     | No Exercise      | Alcoholic     | Occasionally | High Class   |
| Following     | Occasionally     | Non Alcoholic | Occasionally | High Class   |
| Occasionally  | Occasionally     | Occasionally  | Occasionally | High Class   |
| Following     | Occasionally     | Occasionally  | Regular      | High Class   |
| Not Following | Occasionally     | Alcoholic     | Regular      | Poor         |
| Following     | Regular Exercise | Occasionally  | Occasionally | Poor         |
| Occasionally  | No Exercise      | Non Alcoholic | Non Smoker   | Poor         |
| Occasionally  | Regular Exercise | Non Alcoholic | Regular      | High Class   |
| Occasionally  | No Exercise      | Alcoholic     | Regular      | High Class   |
| Occasionally  | Occasionally     | Occasionally  | Occasionally | Poor         |
| Following     | Occasionally     | Occasionally  | Regular      | Poor         |
| Not Following | Occasionally     | Non Alcoholic | Regular      | High Class   |
| Following     | Occasionally     | Occasionally  | Regular      | Poor         |
| Not Following | Occasionally     | Occasionally  | Occasionally | High Class   |
| Not Following | Occasionally     | Alcoholic     | Occasionally | Poor         |
| Occasionally  | Occasionally     | Non Alcoholic | Non Smoker   | Poor         |
| Occasionally  | Regular Exercise | Occasionally  | Non Smoker   | High Class   |

|               |                  |               |              |              |
|---------------|------------------|---------------|--------------|--------------|
| Not Following | Occasionally     | Occasionally  | Occasionally | Middle Class |
| Following     | Regular Exercise | Non Alcoholic | Non Smoker   | Poor         |
| Not Following | Regular Exercise | Alcoholic     | Regular      | High Class   |
| Not Following | Regular Exercise | Occasionally  | Occasionally | High Class   |
| Occasionally  | Occasionally     | Occasionally  | Non Smoker   | Poor         |
| Following     | Occasionally     | Non Alcoholic | Non Smoker   | High Class   |
| Not Following | Occasionally     | Non Alcoholic | Regular      | Poor         |
| Following     | Occasionally     | Non Alcoholic | Non Smoker   | Poor         |
| Following     | Occasionally     | Non Alcoholic | Regular      | Poor         |
| Following     | Occasionally     | Alcoholic     | Regular      | Poor         |
| Following     | Regular Exercise | Alcoholic     | Regular      | Middle Class |
| Following     | Regular Exercise | Non Alcoholic | Non Smoker   | Middle Class |
| Following     | Regular Exercise | Non Alcoholic | Occasionally | Poor         |
| Following     | Occasionally     | Alcoholic     | Regular      | High Class   |
| Following     | Regular Exercise | Non Alcoholic | Non Smoker   | High Class   |
| Occasionally  | Occasionally     | Alcoholic     | Occasionally | Middle Class |
| Occasionally  | Occasionally     | Non Alcoholic | Non Smoker   | High Class   |
| Following     | Regular Exercise | Occasionally  | Regular      | Poor         |
| Occasionally  | Regular Exercise | Occasionally  | Occasionally | Poor         |
| Following     | Occasionally     | Occasionally  | Non Smoker   | Poor         |
| Occasionally  | Occasionally     | Occasionally  | Non Smoker   | Poor         |
| Following     | Regular Exercise | Non Alcoholic | Regular      | Poor         |
| Following     | No Exercise      | Occasionally  | Occasionally | High Class   |
| Not Following | Occasionally     | Non Alcoholic | Occasionally | Poor         |
| Not Following | Regular Exercise | Alcoholic     | Regular      | Poor         |
| Following     | Regular Exercise | Occasionally  | Regular      | Middle Class |
| Not Following | No Exercise      | Alcoholic     | Regular      | Middle Class |
| Following     | Regular Exercise | Non Alcoholic | Non Smoker   | High Class   |
| Following     | Regular Exercise | Alcoholic     | Occasionally | Poor         |
| Following     | Regular Exercise | Non Alcoholic | Regular      | Middle Class |
| Following     | Regular Exercise | Non Alcoholic | Non Smoker   | High Class   |
| Not Following | No Exercise      | Non Alcoholic | Occasionally | Poor         |
| Following     | Regular Exercise | Non Alcoholic | Occasionally | High Class   |
| Following     | No Exercise      | Non Alcoholic | Regular      | Middle Class |
| Following     | No Exercise      | Alcoholic     | Regular      | Middle Class |
| Occasionally  | Occasionally     | Occasionally  | Occasionally | Middle Class |
| Occasionally  | Occasionally     | Non Alcoholic | Occasionally | High Class   |
| Occasionally  | Regular Exercise | Non Alcoholic | Occasionally | Poor         |
| Not Following | No Exercise      | Occasionally  | Occasionally | High Class   |
| Occasionally  | Regular Exercise | Non Alcoholic | Non Smoker   | High Class   |
| Following     | Regular Exercise | Non Alcoholic | Non Smoker   | Middle Class |
| Following     | Occasionally     | Occasionally  | Regular      | High Class   |
| Not Following | No Exercise      | Non Alcoholic | Occasionally | High Class   |
| Occasionally  | No Exercise      | Alcoholic     | Non Smoker   | High Class   |
| Following     | Regular Exercise | Non Alcoholic | Occasionally | Middle Class |
| Following     | No Exercise      | Occasionally  | Regular      | High Class   |
| Following     | Regular Exercise | Non Alcoholic | Occasionally | Poor         |



|              |                  |               |              |              |
|--------------|------------------|---------------|--------------|--------------|
| Following    | No Exercise      | Occasionally  | Regular      | Poor         |
| Following    | Regular Exercise | Non Alcoholic | Regular      | Poor         |
| Following    | No Exercise      | Non Alcoholic | Regular      | High Class   |
| Following    | Regular Exercise | Non Alcoholic | Regular      | Poor         |
| Occasionally | Regular Exercise | Non Alcoholic | Occasionally | Poor         |
| Occasionally | No Exercise      | Non Alcoholic | Regular      | High Class   |
| Following    | Regular Exercise | Non Alcoholic | Regular      | High Class   |
| Following    | No Exercise      | Non Alcoholic | Occasionally | Middle Class |
| Occasionally | Regular Exercise | Non Alcoholic | Regular      | High Class   |
| Occasionally | No Exercise      | Non Alcoholic | Occasionally | High Class   |
| Occasionally | Regular Exercise | Non Alcoholic | Regular      | Poor         |
| Occasionally | Regular Exercise | Non Alcoholic | Regular      | High Class   |
| Occasionally | No Exercise      | Non Alcoholic | Occasionally | Middle Class |
| Occasionally | Regular Exercise | Non Alcoholic | Regular      | High Class   |
| Following    | No Exercise      | Non Alcoholic | Regular      | High Class   |
| Following    | Regular Exercise | Non Alcoholic | Regular      | Poor         |
| Following    | No Exercise      | Non Alcoholic | Occasionally | High Class   |
| Following    | Regular Exercise | Non Alcoholic | Regular      | High Class   |
| Following    | Regular Exercise | Non Alcoholic | Regular      | High Class   |
| Following    | Regular Exercise | Non Alcoholic | Regular      | High Class   |
| Following    | Regular Exercise | Non Alcoholic | Regular      | High Class   |
| Following    | No Exercise      | Non Alcoholic | Occasionally | Middle Class |
| Following    | Regular Exercise | Non Alcoholic | Regular      | Middle Class |
| Following    | Regular Exercise | Non Alcoholic | Regular      | Middle Class |
| Following    | No Exercise      | Occasionally  | Occasionally | Middle Class |
| Following    | Regular Exercise | Occasionally  | Non Smoker   | Middle Class |
| Following    | No Exercise      | Non Alcoholic | Occasionally | Middle Class |
| Following    | Regular Exercise | Non Alcoholic | Regular      | Poor         |
| Following    | Regular Exercise | Non Alcoholic | Regular      | Poor         |
| Following    | No Exercise      | Non Alcoholic | Occasionally | Poor         |
| Following    | Regular Exercise | Non Alcoholic | Regular      | Poor         |
| Following    | Regular Exercise | Non Alcoholic | Regular      | High Class   |
| Following    | No Exercise      | Non Alcoholic | Regular      | High Class   |
| Following    | Regular Exercise | Occasionally  | Occasionally | High Class   |
| Following    | No Exercise      | Non Alcoholic | Non Smoker   | Poor         |
| Following    | Regular Exercise | Non Alcoholic | Regular      | High Class   |
| Following    | Regular Exercise | Non Alcoholic | Regular      | Poor         |
| Following    | No Exercise      | Occasionally  | Regular      | Middle Class |
| Following    | Regular Exercise | Non Alcoholic | Occasionally | Middle Class |
| Following    | No Exercise      | Non Alcoholic | Regular      | Middle Class |
| Following    | Regular Exercise | Non Alcoholic | Regular      | Middle Class |
| Following    | Regular Exercise | Non Alcoholic | Occasionally | Middle Class |
| Following    | Regular Exercise | Occasionally  | Regular      | Middle Class |
| Following    | No Exercise      | Non Alcoholic | Occasionally | High Class   |
| Following    | Regular Exercise | Non Alcoholic | Regular      | High Class   |
| Following    | Regular Exercise | Non Alcoholic | Regular      | High Class   |
| Following    | No Exercise      | Non Alcoholic | Occasionally | High Class   |

|              |                  |               |              |              |
|--------------|------------------|---------------|--------------|--------------|
| Following    | Regular Exercise | Non Alcoholic | Regular      | Poor         |
| Following    | Regular Exercise | Non Alcoholic | Regular      | High Class   |
| Following    | No Exercise      | Non Alcoholic | Regular      | Middle Class |
| Following    | Regular Exercise | Non Alcoholic | Occasionally | Poor         |
| Following    | No Exercise      | Non Alcoholic | Regular      | Poor         |
| Following    | Regular Exercise | Non Alcoholic | Regular      | Poor         |
| Following    | Regular Exercise | Non Alcoholic | Regular      | Poor         |
| Following    | Regular Exercise | Occasionally  | Regular      | Middle Class |
| Following    | No Exercise      | Non Alcoholic | Occasionally | Poor         |
| Occasionally | Regular Exercise | Non Alcoholic | Regular      | High Class   |
| Occasionally | No Exercise      | Non Alcoholic | Regular      | High Class   |
| Occasionally | Regular Exercise | Occasionally  | Occasionally | Middle Class |
| Following    | No Exercise      | Non Alcoholic | Non Smoker   | Middle Class |
| Following    | Regular Exercise | Non Alcoholic | Occasionally | Middle Class |
| Following    | Occasionally     | Non Alcoholic | Regular      | Middle Class |
| Occasionally | Regular Exercise | Non Alcoholic | Regular      | Middle Class |
| Following    | No Exercise      | Occasionally  | Occasionally | High Class   |
| Occasionally | Regular Exercise | Non Alcoholic | Regular      | Middle Class |
| Following    | Regular Exercise | Non Alcoholic | Regular      | Poor         |
| Occasionally | No Exercise      | Non Alcoholic | Regular      | High Class   |
| Following    | Occasionally     | Non Alcoholic | Occasionally | Poor         |
| Following    | Regular Exercise | Non Alcoholic | Non Smoker   | Middle Class |
| Following    | No Exercise      | Alcoholic     | Regular      | High Class   |
| Following    | Regular Exercise | Occasionally  | Regular      | Middle Class |
| Following    | No Exercise      | Non Alcoholic | Regular      | Poor         |
| Following    | Regular Exercise | Non Alcoholic | Occasionally | Poor         |
| Following    | No Exercise      | Non Alcoholic | Regular      | Middle Class |
| Following    | Regular Exercise | Occasionally  | Regular      | Middle Class |
| Following    | Regular Exercise | Occasionally  | Regular      | Middle Class |
| Following    | No Exercise      | Non Alcoholic | Occasionally | Middle Class |
| Following    | No Exercise      | Non Alcoholic | Regular      | Middle Class |
| Following    | Regular Exercise | Occasionally  | Regular      | Middle Class |
| Following    | Regular Exercise | Non Alcoholic | Regular      | Poor         |
| Following    | No Exercise      | Non Alcoholic | Non Smoker   | Poor         |
| Following    | No Exercise      | Non Alcoholic | Regular      | Poor         |
| Following    | No Exercise      | Non Alcoholic | Regular      | High Class   |
| Following    | No Exercise      | Non Alcoholic | Regular      | High Class   |
| Following    | Regular Exercise | Non Alcoholic | Regular      | High Class   |
| Following    | No Exercise      | Non Alcoholic | Occasionally | High Class   |
| Following    | Regular Exercise | Non Alcoholic | Regular      | Middle Class |
| Following    | Occasionally     | Occasionally  | Regular      | High Class   |
| Following    | No Exercise      | Non Alcoholic | Occasionally | Middle Class |
| Following    | No Exercise      | Non Alcoholic | Non Smoker   | High Class   |

|              |                  |               |              |              |
|--------------|------------------|---------------|--------------|--------------|
| Following    | No Exercise      | Non Alcoholic | Occasionally | Middle Class |
| Occasionally | Regular Exercise | Non Alcoholic | Regular      | High Class   |
| Following    | No Exercise      | Non Alcoholic | Regular      | Poor         |
| Following    | Regular Exercise | Non Alcoholic | Occasionally | Poor         |
| Following    | No Exercise      | Non Alcoholic | Regular      | Middle Class |
| Following    | Regular Exercise | Non Alcoholic | Regular      | Middle Class |
| Following    | No Exercise      | Alcoholic     | Regular      | Middle Class |
| Following    | Regular Exercise | Non Alcoholic | Occasionally | Middle Class |
| Following    | No Exercise      | Non Alcoholic | Regular      | High Class   |
| Following    | Occasionally     | Non Alcoholic | Regular      | High Class   |
| Occasionally | Regular Exercise | Non Alcoholic | Regular      | Poor         |
| Occasionally | Regular Exercise | Non Alcoholic | Regular      | Poor         |
| Following    | Regular Exercise | Non Alcoholic | Occasionally | Middle Class |
| Occasionally | Regular Exercise | Non Alcoholic | Regular      | Middle Class |
| Following    | Regular Exercise | Non Alcoholic | Regular      | Middle Class |
| Following    | No Exercise      | Non Alcoholic | Non Smoker   | Middle Class |
| Following    | Regular Exercise | Non Alcoholic | Regular      | Middle Class |
| Following    | Regular Exercise | Occasionally  | Occasionally | High Class   |
| Following    | Regular Exercise | Non Alcoholic | Regular      | Middle Class |
| Occasionally | Regular Exercise | Non Alcoholic | Regular      | High Class   |
| Occasionally | Regular Exercise | Non Alcoholic | Occasionally | High Class   |
| Occasionally | Regular Exercise | Non Alcoholic | Regular      | High Class   |
| Occasionally | Regular Exercise | Non Alcoholic | Regular      | High Class   |
| Following    | No Exercise      | Alcoholic     | Non Smoker   | High Class   |
| Following    | No Exercise      | Non Alcoholic | Regular      | Poor         |
| Following    | No Exercise      | Alcoholic     | Regular      | Poor         |
| Following    | Regular Exercise | Non Alcoholic | Regular      | Poor         |
| Following    | No Exercise      | Non Alcoholic | Regular      | Middle Class |
| Following    | Regular Exercise | Non Alcoholic | Occasionally | High Class   |
| Following    | Regular Exercise | Non Alcoholic | Regular      | Poor         |
| Following    | Regular Exercise | Non Alcoholic | Regular      | Poor         |
| Following    | No Exercise      | Non Alcoholic | Occasionally | Poor         |
| Following    | No Exercise      | Non Alcoholic | Regular      | Poor         |
| Following    | Regular Exercise | Alcoholic     | Occasionally | Poor         |
| Following    | No Exercise      | Non Alcoholic | Regular      | Poor         |
| Following    | No Exercise      | Non Alcoholic | Regular      | Poor         |
| Following    | Regular Exercise | Non Alcoholic | Occasionally | Poor         |
| Following    | Regular Exercise | Non Alcoholic | Regular      | Middle Class |
| Following    | No Exercise      | Non Alcoholic | Regular      | High Class   |
| Occasionally | Regular Exercise | Non Alcoholic | Non Smoker   | Poor         |
| Following    | No Exercise      | Non Alcoholic | Occasionally | Middle Class |
| Following    | No Exercise      | Non Alcoholic | Regular      | Poor         |
| Following    | Regular Exercise | Non Alcoholic | Regular      | Poor         |
| Following    | No Exercise      | Non Alcoholic | Regular      | Poor         |
| Following    | Regular Exercise | Non Alcoholic | Regular      | High Class   |
| Following    | Regular Exercise | Occasionally  | Occasionally | High Class   |

|               |                  |               |              |              |
|---------------|------------------|---------------|--------------|--------------|
| Following     | No Exercise      | Occasionally  | Regular      | High Class   |
| Following     | No Exercise      | Non Alcoholic | Regular      | Poor         |
| Following     | No Exercise      | Non Alcoholic | Occasionally | Poor         |
| Not Following | Regular Exercise | Non Alcoholic | Regular      | Middle Class |
| Following     | Regular Exercise | Non Alcoholic | Occasionally | Middle Class |
| Not Following | Regular Exercise | Non Alcoholic | Regular      | High Class   |
| Following     | No Exercise      | Non Alcoholic | Regular      | Poor         |
| Following     | Regular Exercise | Non Alcoholic | Occasionally | High Class   |
| Following     | No Exercise      | Occasionally  | Regular      | Poor         |
| Not Following | Regular Exercise | Non Alcoholic | Regular      | Middle Class |
| Not Following | No Exercise      | Non Alcoholic | Regular      | Middle Class |
| Not Following | Regular Exercise | Non Alcoholic | Occasionally | High Class   |
| Following     | Regular Exercise | Non Alcoholic | Regular      | Poor         |
| Not Following | Regular Exercise | Non Alcoholic | Regular      | Poor         |
| Not Following | Regular Exercise | Occasionally  | Regular      | Poor         |
| Following     | Regular Exercise | Non Alcoholic | Regular      | High Class   |
| Not Following | Regular Exercise | Non Alcoholic | Occasionally | High Class   |
| Not Following | No Exercise      | Non Alcoholic | Regular      | High Class   |
| Not Following | Regular Exercise | Non Alcoholic | Non Smoker   | High Class   |
| Occasionally  | Regular Exercise | Non Alcoholic | Occasionally | High Class   |
| Not Following | Regular Exercise | Occasionally  | Regular      | Poor         |
| Following     | Regular Exercise | Non Alcoholic | Non Smoker   | Middle Class |
| Occasionally  | Occasionally     | Non Alcoholic | Regular      | High Class   |
| Occasionally  | Regular Exercise | Non Alcoholic | Regular      | High Class   |
| Occasionally  | Regular Exercise | Non Alcoholic | Occasionally | High Class   |
| Occasionally  | Occasionally     | Occasionally  | Regular      | High Class   |
| Following     | No Exercise      | Non Alcoholic | Regular      | High Class   |
| Following     | No Exercise      | Non Alcoholic | Regular      | High Class   |
| Occasionally  | Occasionally     | Non Alcoholic | Occasionally | High Class   |
| Occasionally  | Regular Exercise | Non Alcoholic | Regular      | High Class   |
| Not Following | No Exercise      | Non Alcoholic | Regular      | Middle Class |
| Not Following | Regular Exercise | Non Alcoholic | Regular      | Middle Class |
| Following     | Regular Exercise | Non Alcoholic | Regular      | Middle Class |
| Following     | Regular Exercise | Non Alcoholic | Occasionally | Poor         |
| Not Following | No Exercise      | Non Alcoholic | Regular      | Poor         |
| Following     | Regular Exercise | Occasionally  | Regular      | High Class   |
| Following     | No Exercise      | Non Alcoholic | Occasionally | Middle Class |
| Following     | Regular Exercise | Occasionally  | Regular      | High Class   |
| Not Following | No Exercise      | Non Alcoholic | Occasionally | Poor         |
| Not Following | Regular Exercise | Non Alcoholic | Regular      | Middle Class |
| Not Following | Regular Exercise | Non Alcoholic | Regular      | High Class   |
| Not Following | No Exercise      | Non Alcoholic | Occasionally | Poor         |
| Following     | Occasionally     | Non Alcoholic | Regular      | Middle Class |
| Not Following | Regular Exercise | Non Alcoholic | Regular      | High Class   |
| Following     | No Exercise      | Occasionally  | Regular      | Middle Class |
| Not Following | Regular Exercise | Non Alcoholic | Occasionally | Poor         |
| Following     | No Exercise      | Non Alcoholic | Non Smoker   | High Class   |

|               |                  |               |              |              |
|---------------|------------------|---------------|--------------|--------------|
| Following     | Regular Exercise | Non Alcoholic | Regular      | Middle Class |
| Following     | No Exercise      | Occasionally  | Regular      | Poor         |
| Following     | Regular Exercise | Non Alcoholic | Regular      | High Class   |
| Following     | No Exercise      | Non Alcoholic | Occasionally | Middle Class |
| Following     | Regular Exercise | Non Alcoholic | Regular      | High Class   |
| Not Following | No Exercise      | Non Alcoholic | Regular      | Middle Class |
| Following     | No Exercise      | Non Alcoholic | Occasionally | Poor         |
| Following     | Regular Exercise | Non Alcoholic | Regular      | Poor         |
| Not Following | Occasionally     | Non Alcoholic | Occasionally | Poor         |
| Not Following | No Exercise      | Occasionally  | Regular      | Poor         |
| Occasionally  | Regular Exercise | Non Alcoholic | Regular      | High Class   |
| Occasionally  | Regular Exercise | Non Alcoholic | Occasionally | High Class   |
| Occasionally  | No Exercise      | Non Alcoholic | Regular      | Poor         |
| Not Following | No Exercise      | Non Alcoholic | Regular      | High Class   |
| Occasionally  | No Exercise      | Non Alcoholic | Regular      | High Class   |
| Occasionally  | No Exercise      | Non Alcoholic | Occasionally | Middle Class |
| Occasionally  | Regular Exercise | Non Alcoholic | Regular      | High Class   |
| Not Following | No Exercise      | Non Alcoholic | Regular      | Middle Class |
| Not Following | Regular Exercise | Occasionally  | Regular      | High Class   |
| Not Following | Occasionally     | Non Alcoholic | Regular      | Poor         |
| Following     | No Exercise      | Non Alcoholic | Occasionally | Poor         |
| Following     | No Exercise      | Non Alcoholic | Regular      | Poor         |
| Following     | No Exercise      | Occasionally  | Regular      | Poor         |
| Following     | Regular Exercise | Non Alcoholic | Occasionally | Poor         |
| Not Following | No Exercise      | Non Alcoholic | Non Smoker   | High Class   |
| Not Following | Regular Exercise | Non Alcoholic | Occasionally | High Class   |
| Following     | No Exercise      | Non Alcoholic | Regular      | Poor         |
| Following     | Regular Exercise | Non Alcoholic | Regular      | Poor         |
| Not Following | No Exercise      | Non Alcoholic | Occasionally | High Class   |
| Occasionally  | Regular Exercise | Non Alcoholic | Regular      | Poor         |
| Not Following | No Exercise      | Non Alcoholic | Regular      | Middle Class |
| Not Following | Occasionally     | Occasionally  | Regular      | Middle Class |
| Not Following | Regular Exercise | Non Alcoholic | Occasionally | Middle Class |
| Occasionally  | Occasionally     | Non Alcoholic | Regular      | Poor         |
| Occasionally  | Regular Exercise | Non Alcoholic | Regular      | Poor         |
| Not Following | Regular Exercise | Non Alcoholic | Regular      | High Class   |
| Not Following | Occasionally     | Non Alcoholic | Regular      | Middle Class |
| Not Following | No Exercise      | Non Alcoholic | Occasionally | Poor         |
| Not Following | Regular Exercise | Non Alcoholic | Regular      | Poor         |
| Not Following | Regular Exercise | Non Alcoholic | Regular      | Middle Class |
| Occasionally  | Regular Exercise | Occasionally  | Occasionally | Middle Class |
| Not Following | No Exercise      | Non Alcoholic | Regular      | High Class   |
| Occasionally  | Regular Exercise | Non Alcoholic | Occasionally | High Class   |
| Following     | Regular Exercise | Non Alcoholic | Regular      | High Class   |
| Following     | Regular Exercise | Non Alcoholic | Regular      | Poor         |
| Not Following | Regular Exercise | Non Alcoholic | Occasionally | Poor         |
| Not Following | No Exercise      | Occasionally  | Non Smoker   | High Class   |

|               |                  |               |              |              |
|---------------|------------------|---------------|--------------|--------------|
| Not Following | Regular Exercise | Occasionally  | Regular      | Poor         |
| Following     | Regular Exercise | Non Alcoholic | Regular      | Poor         |
| Following     | Regular Exercise | Non Alcoholic | Regular      | Poor         |
| Not Following | No Exercise      | Alcoholic     | Regular      | Poor         |
| Following     | Occasionally     | Non Alcoholic | Occasionally | Poor         |
| Not Following | Regular Exercise | Non Alcoholic | Regular      | High Class   |
| Following     | No Exercise      | Non Alcoholic | Regular      | Poor         |
| Not Following | Regular Exercise | Occasionally  | Occasionally | High Class   |
| Following     | Occasionally     | Non Alcoholic | Regular      | Poor         |
| Following     | Regular Exercise | Non Alcoholic | Occasionally | Poor         |
| Not Following | No Exercise      | Non Alcoholic | Regular      | High Class   |
| Following     | Regular Exercise | Non Alcoholic | Regular      | Middle Class |
| Not Following | No Exercise      | Non Alcoholic | Occasionally | Middle Class |
| Not Following | No Exercise      | Alcoholic     | Regular      | Middle Class |
| Following     | Regular Exercise | Non Alcoholic | Regular      | Poor         |
| Not Following | Regular Exercise | Non Alcoholic | Regular      | High Class   |
| Following     | Regular Exercise | Non Alcoholic | Occasionally | Middle Class |
| Not Following | Regular Exercise | Non Alcoholic | Regular      | Poor         |
| Not Following | Regular Exercise | Occasionally  | Regular      | Poor         |
| Following     | No Exercise      | Non Alcoholic | Regular      | High Class   |
| Following     | Regular Exercise | Non Alcoholic | Regular      | Poor         |
| Following     | Regular Exercise | Non Alcoholic | Occasionally | Poor         |
| Not Following | Regular Exercise | Non Alcoholic | Regular      | Middle Class |
| Following     | No Exercise      | Occasionally  | Regular      | Poor         |
| Following     | Regular Exercise | Non Alcoholic | Occasionally | Poor         |
| Not Following | Regular Exercise | Non Alcoholic | Regular      | High Class   |
| Not Following | Regular Exercise | Occasionally  | Occasionally | High Class   |
| Following     | Regular Exercise | Non Alcoholic | Regular      | Poor         |
| Following     | No Exercise      | Non Alcoholic | Regular      | Poor         |
| Not Following | No Exercise      | Alcoholic     | Occasionally | Poor         |
| Not Following | No Exercise      | Non Alcoholic | Regular      | Poor         |
| Following     | Regular Exercise | Non Alcoholic | Regular      | Poor         |
| Not Following | No Exercise      | Non Alcoholic | Non Smoker   | High Class   |
| Not Following | No Exercise      | Occasionally  | Occasionally | High Class   |
| Not Following | No Exercise      | Non Alcoholic | Regular      | High Class   |
| Not Following | Regular Exercise | Non Alcoholic | Regular      | High Class   |
| Not Following | No Exercise      | Non Alcoholic | Regular      | High Class   |
| Following     | Regular Exercise | Non Alcoholic | Regular      | High Class   |
| Not Following | No Exercise      | Occasionally  | Occasionally | Middle Class |
| Following     | Regular Exercise | Non Alcoholic | Regular      | Middle Class |
| Not Following | Regular Exercise | Non Alcoholic | Regular      | Middle Class |
| Not Following | Regular Exercise | Non Alcoholic | Occasionally | Middle Class |
| Not Following | Regular Exercise | Non Alcoholic | Regular      | High Class   |
| Following     | No Exercise      | Non Alcoholic | Occasionally | High Class   |
| Not Following | Regular Exercise | Non Alcoholic | Regular      | High Class   |
| Following     | No Exercise      | Alcoholic     | Regular      | High Class   |
| Not Following | No Exercise      | Non Alcoholic | Occasionally | High Class   |

|               |                  |               |              |              |
|---------------|------------------|---------------|--------------|--------------|
| Following     | Regular Exercise | Non Alcoholic | Regular      | Middle Class |
| Following     | Occasionally     | Occasionally  | Regular      | Poor         |
| Following     | Occasionally     | Non Alcoholic | Regular      | Middle Class |
| Following     | No Exercise      | Non Alcoholic | Occasionally | Middle Class |
| Not Following | Occasionally     | Non Alcoholic | Regular      | High Class   |
| Following     | No Exercise      | Non Alcoholic | Regular      | Poor         |
| Following     | No Exercise      | Non Alcoholic | Regular      | Middle Class |
| Following     | No Exercise      | Non Alcoholic | Non Smoker   | High Class   |
| Following     | Regular Exercise | Non Alcoholic | Occasionally | Middle Class |
| Occasionally  | Regular Exercise | Non Alcoholic | Regular      | High Class   |
| Occasionally  | No Exercise      | Occasionally  | Non Smoker   | Middle Class |
| Occasionally  | Occasionally     | Occasionally  | Regular      | High Class   |
| Not Following | No Exercise      | Occasionally  | Regular      | High Class   |
| Not Following | Occasionally     | Non Alcoholic | Occasionally | High Class   |
| Not Following | No Exercise      | Non Alcoholic | Regular      | Middle Class |
| Occasionally  | No Exercise      | Non Alcoholic | Regular      | Middle Class |
| Occasionally  | Regular Exercise | Non Alcoholic | Regular      | Middle Class |
| Occasionally  | No Exercise      | Occasionally  | Occasionally | Middle Class |
| Not Following | No Exercise      | Non Alcoholic | Regular      | Poor         |
| Not Following | Regular Exercise | Non Alcoholic | Regular      | Poor         |
| Following     | No Exercise      | Non Alcoholic | Regular      | High Class   |
| Following     | No Exercise      | Non Alcoholic | Regular      | High Class   |
| Not Following | No Exercise      | Non Alcoholic | Occasionally | High Class   |
| Following     | No Exercise      | Non Alcoholic | Regular      | Middle Class |
| Not Following | No Exercise      | Occasionally  | Regular      | Middle Class |
| Not Following | Regular Exercise | Non Alcoholic | Occasionally | Middle Class |
| Not Following | Regular Exercise | Non Alcoholic | Regular      | Middle Class |
| Following     | Regular Exercise | Occasionally  | Occasionally | Middle Class |
| Occasionally  | Occasionally     | Occasionally  | Occasionally | Poor         |
| Occasionally  | Occasionally     | Non Alcoholic | Occasionally | Poor         |
| Following     | Regular Exercise | Non Alcoholic | Occasionally | Poor         |
| Occasionally  | No Exercise      | Occasionally  | Non Smoker   | Poor         |
| Following     | Regular Exercise | Non Alcoholic | Occasionally | Poor         |
| Following     | No Exercise      | Occasionally  | Occasionally | Middle Class |
| Occasionally  | Regular Exercise | Occasionally  | Occasionally | Middle Class |
| Occasionally  | Regular Exercise | Occasionally  | Occasionally | Middle Class |
| Following     | No Exercise      | Alcoholic     | Non Smoker   | Middle Class |
| Occasionally  | No Exercise      | Occasionally  | Regular      | Middle Class |
| Occasionally  | Occasionally     | Occasionally  | Regular      | Middle Class |
| Following     | Regular Exercise | Alcoholic     | Occasionally | High Class   |
| Occasionally  | Occasionally     | Alcoholic     | Occasionally | High Class   |
| Following     | No Exercise      | Non Alcoholic | Regular      | High Class   |
| Following     | Regular Exercise | Non Alcoholic | Regular      | Poor         |
| Following     | No Exercise      | Alcoholic     | Occasionally | High Class   |
| Occasionally  | No Exercise      | Non Alcoholic | Regular      | Poor         |
| Not Following | Regular Exercise | Occasionally  | Occasionally | Poor         |
| Following     | Regular Exercise | Alcoholic     | Regular      | Middle Class |

|               |                  |               |              |              |
|---------------|------------------|---------------|--------------|--------------|
| Not Following | No Exercise      | Occasionally  | Regular      | High Class   |
| Following     | Regular Exercise | Non Alcoholic | Non Smoker   | High Class   |
| Following     | Regular Exercise | Alcoholic     | Regular      | Middle Class |
| Following     | Regular Exercise | Non Alcoholic | Occasionally | High Class   |
| Not Following | Regular Exercise | Alcoholic     | Occasionally | High Class   |
| Not Following | No Exercise      | Alcoholic     | Regular      | High Class   |
| Not Following | No Exercise      | Occasionally  | Occasionally | Middle Class |
| Following     | No Exercise      | Occasionally  | Non Smoker   | High Class   |
| Not Following | Occasionally     | Alcoholic     | Regular      | Poor         |
| Not Following | No Exercise      | Alcoholic     | Non Smoker   | High Class   |
| Occasionally  | Regular Exercise | Non Alcoholic | Non Smoker   | Poor         |
| Occasionally  | Regular Exercise | Non Alcoholic | Non Smoker   | Poor         |
| Not Following | Occasionally     | Non Alcoholic | Regular      | High Class   |
| Following     | Regular Exercise | Non Alcoholic | Non Smoker   | Poor         |
| Occasionally  | Regular Exercise | Occasionally  | Regular      | Poor         |
| Following     | No Exercise      | Occasionally  | Regular      | High Class   |
| Occasionally  | Regular Exercise | Occasionally  | Occasionally | Middle Class |
| Not Following | Regular Exercise | Non Alcoholic | Regular      | High Class   |
| Following     | Regular Exercise | Occasionally  | Occasionally | Middle Class |
| Following     | Occasionally     | Occasionally  | Occasionally | Middle Class |
| Following     | No Exercise      | Alcoholic     | Occasionally | High Class   |
| Following     | No Exercise      | Non Alcoholic | Regular      | High Class   |
| Not Following | Regular Exercise | Alcoholic     | Regular      | Poor         |
| Following     | Occasionally     | Non Alcoholic | Regular      | Poor         |
| Occasionally  | Occasionally     | Non Alcoholic | Regular      | Poor         |
| Occasionally  | No Exercise      | Occasionally  | Occasionally | Middle Class |
| Occasionally  | Regular Exercise | Alcoholic     | Regular      | High Class   |
| Not Following | No Exercise      | Occasionally  | Occasionally | High Class   |
| Occasionally  | Regular Exercise | Non Alcoholic | Non Smoker   | High Class   |
| Not Following | No Exercise      | Non Alcoholic | Non Smoker   | Poor         |
| Not Following | No Exercise      | Alcoholic     | Occasionally | Poor         |
| Occasionally  | Occasionally     | Occasionally  | Occasionally | Poor         |
| Not Following | No Exercise      | Alcoholic     | Regular      | High Class   |
| Following     | Regular Exercise | Alcoholic     | Regular      | Poor         |
| Not Following | Regular Exercise | Occasionally  | Regular      | Poor         |
| Occasionally  | Occasionally     | Occasionally  | Occasionally | High Class   |
| Not Following | Occasionally     | Occasionally  | Regular      | Middle Class |
| Occasionally  | No Exercise      | Non Alcoholic | Non Smoker   | Middle Class |
| Not Following | No Exercise      | Non Alcoholic | Non Smoker   | High Class   |
| Not Following | Regular Exercise | Alcoholic     | Regular      | High Class   |
| Following     | No Exercise      | Non Alcoholic | Non Smoker   | Poor         |
| Not Following | No Exercise      | Non Alcoholic | Regular      | Poor         |
| Occasionally  | No Exercise      | Occasionally  | Regular      | Poor         |
| Not Following | Occasionally     | Occasionally  | Occasionally | Middle Class |
| Following     | Regular Exercise | Non Alcoholic | Non Smoker   | High Class   |
| Not Following | Occasionally     | Alcoholic     | Regular      | High Class   |
| Not Following | No Exercise      | Non Alcoholic | Occasionally | Middle Class |



|               |                  |               |              |              |
|---------------|------------------|---------------|--------------|--------------|
| Not Following | No Exercise      | Occasionally  | Regular      | Middle Class |
| Not Following | Regular Exercise | Occasionally  | Regular      | Middle Class |
| Following     | No Exercise      | Non Alcoholic | Occasionally | High Class   |
| Not Following | Occasionally     | Occasionally  | Occasionally | Poor         |
| Occasionally  | No Exercise      | Non Alcoholic | Non Smoker   | Middle Class |
| Occasionally  | Regular Exercise | Occasionally  | Occasionally | High Class   |
| Following     | No Exercise      | Alcoholic     | Regular      | Poor         |
| Not Following | No Exercise      | Non Alcoholic | Regular      | Poor         |
| Occasionally  | Regular Exercise | Non Alcoholic | Non Smoker   | Poor         |
| Following     | No Exercise      | Alcoholic     | Occasionally | Poor         |
| Following     | Regular Exercise | Non Alcoholic | Occasionally | High Class   |
| Following     | No Exercise      | Non Alcoholic | Non Smoker   | Middle Class |
| Occasionally  | No Exercise      | Non Alcoholic | Regular      | High Class   |
| Following     | Regular Exercise | Non Alcoholic | Occasionally | Middle Class |
| Occasionally  | Occasionally     | Non Alcoholic | Occasionally | High Class   |
| Following     | Occasionally     | Non Alcoholic | Occasionally | Poor         |
| Following     | Regular Exercise | Non Alcoholic | Non Smoker   | Middle Class |
| Occasionally  | Occasionally     | Occasionally  | Occasionally | Poor         |
| Following     | Occasionally     | Occasionally  | Occasionally | Middle Class |
| Following     | No Exercise      | Alcoholic     | Non Smoker   | Poor         |
| Following     | No Exercise      | Non Alcoholic | Regular      | Poor         |
| Occasionally  | No Exercise      | Occasionally  | Non Smoker   | Poor         |
| Not Following | No Exercise      | Non Alcoholic | Regular      | High Class   |
| Following     | Occasionally     | Alcoholic     | Regular      | High Class   |
| Not Following | Occasionally     | Occasionally  | Occasionally | High Class   |
| Following     | No Exercise      | Non Alcoholic | Non Smoker   | High Class   |
| Not Following | No Exercise      | Alcoholic     | Regular      | High Class   |
| Following     | Regular Exercise | Occasionally  | Occasionally | Middle Class |
| Following     | No Exercise      | Occasionally  | Regular      | Poor         |
| Not Following | Occasionally     | Non Alcoholic | Non Smoker   | High Class   |
| Occasionally  | No Exercise      | Non Alcoholic | Regular      | High Class   |
| Not Following | No Exercise      | Non Alcoholic | Non Smoker   | Middle Class |
| Occasionally  | Occasionally     | Occasionally  | Occasionally | High Class   |
| Occasionally  | Occasionally     | Alcoholic     | Non Smoker   | High Class   |
| Not Following | No Exercise      | Occasionally  | Occasionally | Poor         |
| Occasionally  | No Exercise      | Non Alcoholic | Occasionally | Poor         |
| Not Following | Occasionally     | Non Alcoholic | Non Smoker   | Middle Class |
| Occasionally  | Occasionally     | Non Alcoholic | Non Smoker   | Middle Class |
| Not Following | Regular Exercise | Alcoholic     | Regular      | Middle Class |
| Following     | Regular Exercise | Non Alcoholic | Regular      | Middle Class |
| Following     | No Exercise      | Non Alcoholic | Non Smoker   | Middle Class |
| Following     | Occasionally     | Non Alcoholic | Non Smoker   | High Class   |
| Occasionally  | Occasionally     | Non Alcoholic | Non Smoker   | High Class   |
| Not Following | No Exercise      | Non Alcoholic | Non Smoker   | Middle Class |
| Following     | No Exercise      | Alcoholic     | Non Smoker   | Middle Class |
| Not Following | No Exercise      | Non Alcoholic | Non Smoker   | High Class   |
| Following     | No Exercise      | Non Alcoholic | Non Smoker   | Poor         |

|               |                  |               |              |              |
|---------------|------------------|---------------|--------------|--------------|
| Following     | No Exercise      | Alcoholic     | Regular      | Poor         |
| Not Following | No Exercise      | Non Alcoholic | Non Smoker   | High Class   |
| Following     | Occasionally     | Occasionally  | Occasionally | High Class   |
| Not Following | No Exercise      | Alcoholic     | Regular      | Poor         |
| Not Following | No Exercise      | Non Alcoholic | Non Smoker   | Middle Class |
| Following     | Occasionally     | Occasionally  | Occasionally | Poor         |
| Following     | Regular Exercise | Non Alcoholic | Non Smoker   | Poor         |
| Following     | No Exercise      | Alcoholic     | Regular      | Middle Class |
| Following     | No Exercise      | Non Alcoholic | Occasionally | Poor         |
| Not Following | Occasionally     | Occasionally  | Regular      | Middle Class |
| Not Following | No Exercise      | Non Alcoholic | Non Smoker   | Middle Class |
| Not Following | No Exercise      | Occasionally  | Occasionally | Poor         |
| Not Following | No Exercise      | Non Alcoholic | Regular      | Middle Class |
| Not Following | No Exercise      | Alcoholic     | Regular      | Poor         |
| Not Following | Regular Exercise | Occasionally  | Non Smoker   | Poor         |
| Not Following | Occasionally     | Occasionally  | Non Smoker   | High Class   |
| Following     | Regular Exercise | Alcoholic     | Regular      | Poor         |
| Not Following | Regular Exercise | Non Alcoholic | Occasionally | High Class   |
| Following     | Regular Exercise | Occasionally  | Regular      | High Class   |
| Following     | Occasionally     | Non Alcoholic | Non Smoker   | High Class   |
| Following     | Regular Exercise | Alcoholic     | Regular      | Middle Class |
| Occasionally  | Occasionally     | Occasionally  | Occasionally | Middle Class |
| Following     | Regular Exercise | Non Alcoholic | Non Smoker   | Middle Class |
| Following     | No Exercise      | Occasionally  | Regular      | Middle Class |
| Occasionally  | No Exercise      | Non Alcoholic | Occasionally | Middle Class |
| Following     | Regular Exercise | Occasionally  | Occasionally | Poor         |
| Following     | No Exercise      | Alcoholic     | Regular      | Poor         |
| Occasionally  | No Exercise      | Occasionally  | Regular      | High Class   |
| Following     | Occasionally     | Non Alcoholic | Occasionally | Poor         |
| Following     | Occasionally     | Alcoholic     | Occasionally | Middle Class |
| Following     | Regular Exercise | Non Alcoholic | Non Smoker   | Middle Class |
| Occasionally  | No Exercise      | Non Alcoholic | Occasionally | Poor         |
| Not Following | No Exercise      | Non Alcoholic | Regular      | Poor         |
| Following     | Regular Exercise | Occasionally  | Regular      | High Class   |
| Following     | Regular Exercise | Non Alcoholic | Occasionally | Poor         |
| Occasionally  | No Exercise      | Non Alcoholic | Non Smoker   | Poor         |
| Following     | Regular Exercise | Occasionally  | Regular      | Poor         |
| Not Following | Regular Exercise | Occasionally  | Occasionally | Middle Class |
| Following     | Regular Exercise | Non Alcoholic | Non Smoker   | High Class   |
| Occasionally  | Occasionally     | Occasionally  | Occasionally | Poor         |
| Following     | Regular Exercise | Alcoholic     | Occasionally | High Class   |
| Following     | No Exercise      | Non Alcoholic | Regular      | Middle Class |
| Not Following | Regular Exercise | Alcoholic     | Non Smoker   | Poor         |
| Occasionally  | Regular Exercise | Non Alcoholic | Regular      | High Class   |
| Following     | No Exercise      | Non Alcoholic | Non Smoker   | Poor         |
| Following     | Regular Exercise | Occasionally  | Non Smoker   | High Class   |
| Following     | Regular Exercise | Alcoholic     | Occasionally | Poor         |

|               |                  |               |              |              |
|---------------|------------------|---------------|--------------|--------------|
| Following     | Regular Exercise | Alcoholic     | Regular      | High Class   |
| Following     | Occasionally     | Non Alcoholic | Non Smoker   | Poor         |
| Following     | No Exercise      | Alcoholic     | Occasionally | Middle Class |
| Following     | Occasionally     | Occasionally  | Occasionally | Middle Class |
| Occasionally  | Regular Exercise | Non Alcoholic | Regular      | Poor         |
| Occasionally  | No Exercise      | Non Alcoholic | Occasionally | Middle Class |
| Following     | Regular Exercise | Non Alcoholic | Non Smoker   | Middle Class |
| Following     | Regular Exercise | Non Alcoholic | Non Smoker   | Poor         |
| Following     | Occasionally     | Alcoholic     | Regular      | High Class   |
| Occasionally  | No Exercise      | Alcoholic     | Non Smoker   | Middle Class |
| Occasionally  | No Exercise      | Non Alcoholic | Regular      | High Class   |
| Following     | No Exercise      | Non Alcoholic | Non Smoker   | Poor         |
| Following     | No Exercise      | Occasionally  | Non Smoker   | High Class   |
| Occasionally  | Regular Exercise | Non Alcoholic | Occasionally | High Class   |
| Following     | Regular Exercise | Alcoholic     | Regular      | High Class   |
| Occasionally  | No Exercise      | Alcoholic     | Regular      | Poor         |
| Occasionally  | No Exercise      | Non Alcoholic | Non Smoker   | High Class   |
| Occasionally  | Regular Exercise | Occasionally  | Non Smoker   | Poor         |
| Following     | Occasionally     | Alcoholic     | Non Smoker   | Poor         |
| Occasionally  | No Exercise      | Occasionally  | Occasionally | High Class   |
| Not Following | Regular Exercise | Non Alcoholic | Non Smoker   | Poor         |
| Occasionally  | Occasionally     | Alcoholic     | Non Smoker   | Poor         |
| Following     | Regular Exercise | Alcoholic     | Non Smoker   | Middle Class |
| Following     | Regular Exercise | Alcoholic     | Regular      | High Class   |
| Following     | Regular Exercise | Alcoholic     | Non Smoker   | Middle Class |
| Occasionally  | Regular Exercise | Occasionally  | Regular      | Poor         |
| Occasionally  | Occasionally     | Occasionally  | Regular      | Poor         |
| Occasionally  | No Exercise      | Alcoholic     | Regular      | High Class   |
| Occasionally  | Regular Exercise | Non Alcoholic | Regular      | High Class   |
| Occasionally  | Regular Exercise | Non Alcoholic | Occasionally | High Class   |
| Occasionally  | Regular Exercise | Occasionally  | Non Smoker   | High Class   |
| Occasionally  | Regular Exercise | Alcoholic     | Regular      | High Class   |
| Occasionally  | Occasionally     | Alcoholic     | Occasionally | High Class   |
| Occasionally  | No Exercise      | Occasionally  | Occasionally | High Class   |
| Following     | Regular Exercise | Non Alcoholic | Non Smoker   | Poor         |
| Occasionally  | Regular Exercise | Alcoholic     | Non Smoker   | Poor         |
| Following     | Regular Exercise | Occasionally  | Non Smoker   | Poor         |
| Occasionally  | Occasionally     | Non Alcoholic | Regular      | High Class   |
| Occasionally  | Occasionally     | Non Alcoholic | Occasionally | High Class   |
| Occasionally  | Occasionally     | Non Alcoholic | Non Smoker   | Poor         |
| Occasionally  | No Exercise      | Non Alcoholic | Regular      | Poor         |
| Not Following | Regular Exercise | Alcoholic     | Non Smoker   | High Class   |
| Occasionally  | Regular Exercise | Alcoholic     | Occasionally | Poor         |
| Following     | Regular Exercise | Alcoholic     | Occasionally | High Class   |
| Following     | Regular Exercise | Alcoholic     | Occasionally | Poor         |
| Following     | Regular Exercise | Alcoholic     | Occasionally | Poor         |
| Not Following | Regular Exercise | Non Alcoholic | Occasionally | High Class   |

|               |                  |               |              |              |
|---------------|------------------|---------------|--------------|--------------|
| Occasionally  | Occasionally     | Non Alcoholic | Non Smoker   | Middle Class |
| Not Following | No Exercise      | Non Alcoholic | Regular      | Poor         |
| Occasionally  | Regular Exercise | Non Alcoholic | Regular      | High Class   |
| Not Following | Regular Exercise | Non Alcoholic | Occasionally | High Class   |
| Following     | Occasionally     | Alcoholic     | Non Smoker   | Poor         |
| Not Following | Regular Exercise | Non Alcoholic | Non Smoker   | High Class   |
| Occasionally  | Occasionally     | Alcoholic     | Occasionally | Poor         |
| Occasionally  | Regular Exercise | Occasionally  | Occasionally | Poor         |
| Occasionally  | Regular Exercise | Occasionally  | Regular      | Poor         |
| Following     | Regular Exercise | Alcoholic     | Occasionally | Poor         |
| Following     | Occasionally     | Alcoholic     | Regular      | Middle Class |
| Following     | No Exercise      | Non Alcoholic | Regular      | Middle Class |
| Not Following | Occasionally     | Occasionally  | Occasionally | Poor         |
| Occasionally  | Regular Exercise | Alcoholic     | Non Smoker   | High Class   |
| Following     | Regular Exercise | Non Alcoholic | Occasionally | High Class   |
| Not Following | No Exercise      | Alcoholic     | Regular      | Middle Class |
| Occasionally  | Regular Exercise | Occasionally  | Regular      | High Class   |
| Not Following | No Exercise      | Occasionally  | Occasionally | Poor         |
| Occasionally  | Regular Exercise | Alcoholic     | Regular      | Poor         |
| Occasionally  | Regular Exercise | Occasionally  | Non Smoker   | Poor         |
| Occasionally  | No Exercise      | Alcoholic     | Occasionally | Poor         |
| Not Following | Occasionally     | Non Alcoholic | Occasionally | Poor         |
| Occasionally  | No Exercise      | Alcoholic     | Occasionally | High Class   |
| Not Following | Regular Exercise | Non Alcoholic | Non Smoker   | Poor         |
| Occasionally  | Regular Exercise | Occasionally  | Non Smoker   | Poor         |
| Following     | Occasionally     | Occasionally  | Non Smoker   | Middle Class |
| Not Following | No Exercise      | Non Alcoholic | Regular      | Middle Class |
| Following     | No Exercise      | Non Alcoholic | Regular      | High Class   |
| Occasionally  | Occasionally     | Occasionally  | Regular      | Poor         |
| Occasionally  | Regular Exercise | Non Alcoholic | Occasionally | Middle Class |
| Occasionally  | Regular Exercise | Non Alcoholic | Regular      | High Class   |
| Not Following | Occasionally     | Alcoholic     | Non Smoker   | Poor         |
| Following     | Regular Exercise | Alcoholic     | Occasionally | High Class   |
| Occasionally  | Occasionally     | Alcoholic     | Regular      | Middle Class |
| Not Following | Occasionally     | Non Alcoholic | Non Smoker   | Middle Class |
| Occasionally  | Occasionally     | Alcoholic     | Non Smoker   | Middle Class |
| Not Following | Occasionally     | Alcoholic     | Non Smoker   | High Class   |
| Not Following | No Exercise      | Non Alcoholic | Regular      | Poor         |
| Following     | No Exercise      | Alcoholic     | Regular      | High Class   |
| Following     | No Exercise      | Occasionally  | Occasionally | High Class   |
| Occasionally  | No Exercise      | Occasionally  | Regular      | Middle Class |
| Following     | No Exercise      | Non Alcoholic | Occasionally | High Class   |
| Occasionally  | Regular Exercise | Non Alcoholic | Occasionally | High Class   |
| Occasionally  | Regular Exercise | Alcoholic     | Occasionally | High Class   |
| Following     | No Exercise      | Alcoholic     | Regular      | Middle Class |
| Following     | Occasionally     | Non Alcoholic | Regular      | High Class   |
| Following     | Occasionally     | Non Alcoholic | Regular      | Poor         |

|               |                  |               |              |              |
|---------------|------------------|---------------|--------------|--------------|
| Following     | No Exercise      | Non Alcoholic | Non Smoker   | Poor         |
| Occasionally  | Regular Exercise | Non Alcoholic | Non Smoker   | Poor         |
| Occasionally  | Regular Exercise | Occasionally  | Non Smoker   | High Class   |
| Following     | No Exercise      | Occasionally  | Non Smoker   | Poor         |
| Not Following | No Exercise      | Alcoholic     | Non Smoker   | Poor         |
| Occasionally  | Regular Exercise | Alcoholic     | Non Smoker   | High Class   |
| Not Following | Occasionally     | Alcoholic     | Non Smoker   | High Class   |
| Following     | Occasionally     | Occasionally  | Non Smoker   | Middle Class |
| Occasionally  | Regular Exercise | Occasionally  | Non Smoker   | High Class   |
| Following     | Regular Exercise | Alcoholic     | Non Smoker   | High Class   |
| Following     | Occasionally     | Non Alcoholic | Non Smoker   | Poor         |
| Not Following | Regular Exercise | Non Alcoholic | Regular      | High Class   |
| Occasionally  | No Exercise      | Occasionally  | Non Smoker   | Middle Class |
| Occasionally  | No Exercise      | Occasionally  | Non Smoker   | High Class   |
| Following     | Regular Exercise | Alcoholic     | Non Smoker   | High Class   |
| Not Following | No Exercise      | Alcoholic     | Occasionally | Poor         |
| Not Following | Regular Exercise | Alcoholic     | Non Smoker   | High Class   |
| Not Following | Occasionally     | Occasionally  | Non Smoker   | High Class   |
| Following     | Occasionally     | Alcoholic     | Non Smoker   | High Class   |
| Following     | Occasionally     | Non Alcoholic | Non Smoker   | High Class   |
| Following     | No Exercise      | Non Alcoholic | Regular      | High Class   |
| Following     | Occasionally     | Non Alcoholic | Non Smoker   | Middle Class |
| Following     | Regular Exercise | Occasionally  | Non Smoker   | Middle Class |
| Not Following | Regular Exercise | Occasionally  | Non Smoker   | Middle Class |
| Not Following | Occasionally     | Occasionally  | Non Smoker   | Middle Class |
| Not Following | Occasionally     | Alcoholic     | Non Smoker   | Middle Class |
| Occasionally  | No Exercise      | Alcoholic     | Regular      | Middle Class |
| Not Following | No Exercise      | Alcoholic     | Regular      | Poor         |
| Following     | Regular Exercise | Alcoholic     | Occasionally | Poor         |
| Occasionally  | Regular Exercise | Alcoholic     | Occasionally | Poor         |
| Occasionally  | Occasionally     | Non Alcoholic | Occasionally | Poor         |
| Not Following | No Exercise      | Non Alcoholic | Regular      | High Class   |
| Following     | No Exercise      | Non Alcoholic | Regular      | High Class   |
| Following     | Regular Exercise | Occasionally  | Regular      | High Class   |
| Not Following | Regular Exercise | Occasionally  | Occasionally | Poor         |
| Occasionally  | No Exercise      | Occasionally  | Occasionally | High Class   |
| Occasionally  | No Exercise      | Alcoholic     | Non Smoker   | Poor         |
| Following     | Occasionally     | Occasionally  | Non Smoker   | Middle Class |
| Not Following | Occasionally     | Occasionally  | Non Smoker   | Middle Class |
| Not Following | Regular Exercise | Non Alcoholic | Non Smoker   | Middle Class |
| Occasionally  | Occasionally     | Non Alcoholic | Occasionally | Middle Class |
| Following     | No Exercise      | Occasionally  | Occasionally | Middle Class |
| Following     | Regular Exercise | Occasionally  | Occasionally | Middle Class |
| Following     | Regular Exercise | Occasionally  | Regular      | Poor         |
| Not Following | No Exercise      | Non Alcoholic | Occasionally | High Class   |
| Following     | No Exercise      | Non Alcoholic | Regular      | Poor         |
| Occasionally  | Regular Exercise | Non Alcoholic | Occasionally | Middle Class |

|               |                  |               |              |              |
|---------------|------------------|---------------|--------------|--------------|
| Following     | Regular Exercise | Non Alcoholic | Regular      | High Class   |
| Occasionally  | Occasionally     | Non Alcoholic | Regular      | Middle Class |
| Not Following | No Exercise      | Occasionally  | Occasionally | Poor         |
| Following     | No Exercise      | Non Alcoholic | Regular      | Poor         |
| Not Following | No Exercise      | Non Alcoholic | Regular      | Middle Class |
| Following     | No Exercise      | Occasionally  | Regular      | Middle Class |
| Not Following | No Exercise      | Non Alcoholic | Occasionally | Middle Class |
| Following     | Regular Exercise | Non Alcoholic | Regular      | High Class   |
| Not Following | No Exercise      | Non Alcoholic | Regular      | High Class   |
| Following     | Regular Exercise | Occasionally  | Regular      | High Class   |
| Not Following | Occasionally     | Non Alcoholic | Regular      | Middle Class |
| Not Following | Occasionally     | Non Alcoholic | Occasionally | Middle Class |
| Not Following | Regular Exercise | Non Alcoholic | Regular      | Middle Class |
| Not Following | Regular Exercise | Non Alcoholic | Regular      | Middle Class |
| Not Following | No Exercise      | Occasionally  | Occasionally | Poor         |
| Following     | Regular Exercise | Non Alcoholic | Regular      | Poor         |
| Following     | No Exercise      | Non Alcoholic | Occasionally | Poor         |
| Following     | Regular Exercise | Non Alcoholic | Regular      | High Class   |
| Occasionally  | No Exercise      | Occasionally  | Regular      | High Class   |
| Occasionally  | Regular Exercise | Non Alcoholic | Occasionally | High Class   |
| Occasionally  | Occasionally     | Alcoholic     | Regular      | High Class   |
| Occasionally  | Regular Exercise | Alcoholic     | Regular      | Middle Class |
| Occasionally  | Occasionally     | Non Alcoholic | Regular      | High Class   |
| Occasionally  | Regular Exercise | Non Alcoholic | Occasionally | Middle Class |
| Occasionally  | Regular Exercise | Occasionally  | Regular      | High Class   |
| Occasionally  | Regular Exercise | Non Alcoholic | Regular      | Middle Class |
| Not Following | No Exercise      | Occasionally  | Regular      | High Class   |
| Occasionally  | No Exercise      | Non Alcoholic | Regular      | Poor         |
| Not Following | Occasionally     | Non Alcoholic | Occasionally | Poor         |
| Not Following | No Exercise      | Non Alcoholic | Regular      | Middle Class |
| Not Following | Regular Exercise | Non Alcoholic | Regular      | Middle Class |
| Following     | Occasionally     | Non Alcoholic | Occasionally | Middle Class |
| Occasionally  | No Exercise      | Non Alcoholic | Regular      | Middle Class |
| Not Following | Regular Exercise | Non Alcoholic | Occasionally | High Class   |
| Occasionally  | No Exercise      | Non Alcoholic | Regular      | High Class   |
| Not Following | No Exercise      | Non Alcoholic | Regular      | Poor         |
| Occasionally  | No Exercise      | Occasionally  | Occasionally | Poor         |
| Not Following | No Exercise      | Non Alcoholic | Regular      | Middle Class |
| Not Following | Regular Exercise | Non Alcoholic | Regular      | Middle Class |
| Following     | Regular Exercise | Alcoholic     | Regular      | Middle Class |
| Not Following | No Exercise      | Non Alcoholic | Occasionally | Middle Class |
| Following     | Regular Exercise | Alcoholic     | Regular      | Middle Class |
| Following     | Occasionally     | Alcoholic     | Regular      | High Class   |
| Following     | Regular Exercise | Non Alcoholic | Non Smoker   | Middle Class |
| Following     | No Exercise      | Non Alcoholic | Regular      | High Class   |
| Following     | Regular Exercise | Occasionally  | Occasionally | High Class   |
| Not Following | No Exercise      | Non Alcoholic | Regular      | High Class   |

|               |                  |               |              |              |
|---------------|------------------|---------------|--------------|--------------|
| Following     | Occasionally     | Non Alcoholic | Regular      | High Class   |
| Following     | Occasionally     | Occasionally  | Occasionally | High Class   |
| Following     | No Exercise      | Non Alcoholic | Regular      | High Class   |
| Following     | No Exercise      | Non Alcoholic | Occasionally | Poor         |
| Not Following | No Exercise      | Non Alcoholic | Regular      | Poor         |
| Following     | Occasionally     | Non Alcoholic | Regular      | Poor         |
| Occasionally  | Regular Exercise | Non Alcoholic | Occasionally | Middle Class |
| Following     | No Exercise      | Non Alcoholic | Regular      | High Class   |
| Following     | No Exercise      | Non Alcoholic | Regular      | Poor         |
| Occasionally  | Occasionally     | Non Alcoholic | Regular      | Poor         |
| Not Following | No Exercise      | Occasionally  | Occasionally | Poor         |
| Following     | No Exercise      | Non Alcoholic | Regular      | Poor         |
| Following     | No Exercise      | Non Alcoholic | Regular      | Poor         |
| Following     | Regular Exercise | Non Alcoholic | Regular      | Poor         |
| Occasionally  | Regular Exercise | Alcoholic     | Regular      | Poor         |
| Occasionally  | Regular Exercise | Occasionally  | Occasionally | Poor         |
| Not Following | No Exercise      | Non Alcoholic | Regular      | Middle Class |
| Occasionally  | No Exercise      | Non Alcoholic | Non Smoker   | High Class   |
| Not Following | Regular Exercise | Non Alcoholic | Occasionally | Poor         |
| Not Following | Regular Exercise | Alcoholic     | Regular      | Middle Class |
| Following     | Regular Exercise | Non Alcoholic | Occasionally | Poor         |
| Not Following | Regular Exercise | Non Alcoholic | Non Smoker   | Poor         |
| Following     | No Exercise      | Non Alcoholic | Regular      | Poor         |
| Not Following | Occasionally     | Non Alcoholic | Occasionally | High Class   |
| Not Following | Regular Exercise | Non Alcoholic | Regular      | High Class   |
| Not Following | Regular Exercise | Occasionally  | Regular      | High Class   |
| Following     | Regular Exercise | Non Alcoholic | Regular      | Poor         |
| Not Following | No Exercise      | Non Alcoholic | Occasionally | Poor         |
| Not Following | Regular Exercise | Non Alcoholic | Regular      | Middle Class |
| Not Following | Regular Exercise | Non Alcoholic | Regular      | Middle Class |
| Not Following | Occasionally     | Occasionally  | Regular      | High Class   |
| Not Following | No Exercise      | Non Alcoholic | Regular      | Poor         |
| Not Following | Regular Exercise | Occasionally  | Regular      | Middle Class |
| Not Following | Regular Exercise | Occasionally  | Regular      | Middle Class |
| Not Following | Regular Exercise | Non Alcoholic | Occasionally | Middle Class |
| Not Following | Occasionally     | Non Alcoholic | Regular      | Poor         |
| Occasionally  | Regular Exercise | Non Alcoholic | Regular      | Poor         |
| Occasionally  | Regular Exercise | Non Alcoholic | Regular      | High Class   |
| Occasionally  | Occasionally     | Occasionally  | Occasionally | Middle Class |
| Occasionally  | Regular Exercise | Non Alcoholic | Regular      | High Class   |
| Following     | Regular Exercise | Non Alcoholic | Regular      | Poor         |
| Not Following | Regular Exercise | Non Alcoholic | Regular      | Middle Class |
| Not Following | Regular Exercise | Non Alcoholic | Regular      | High Class   |
| Not Following | Regular Exercise | Non Alcoholic | Occasionally | Poor         |
| Not Following | Regular Exercise | Occasionally  | Non Smoker   | Middle Class |
| Not Following | Occasionally     | Non Alcoholic | Regular      | High Class   |
| Not Following | Regular Exercise | Non Alcoholic | Occasionally | Middle Class |

|               |                  |               |              |              |
|---------------|------------------|---------------|--------------|--------------|
| Following     | Regular Exercise | Occasionally  | Regular      | Poor         |
| Not Following | Occasionally     | Non Alcoholic | Occasionally | High Class   |
| Not Following | Regular Exercise | Non Alcoholic | Regular      | Middle Class |
| Not Following | Regular Exercise | Non Alcoholic | Regular      | Poor         |
| Not Following | Regular Exercise | Non Alcoholic | Occasionally | High Class   |
| Following     | No Exercise      | Non Alcoholic | Regular      | Middle Class |
| Following     | No Exercise      | Non Alcoholic | Regular      | High Class   |
| Not Following | No Exercise      | Occasionally  | Regular      | Middle Class |
| Not Following | No Exercise      | Non Alcoholic | Occasionally | Poor         |
| Following     | No Exercise      | Non Alcoholic | Regular      | Poor         |
| Not Following | Regular Exercise | Non Alcoholic | Regular      | Poor         |
| Following     | Regular Exercise | Non Alcoholic | Regular      | Poor         |
| Following     | Occasionally     | Occasionally  | Regular      | High Class   |
| Occasionally  | Regular Exercise | Non Alcoholic | Occasionally | High Class   |
| Not Following | No Exercise      | Non Alcoholic | Regular      | Poor         |
| Not Following | Regular Exercise | Non Alcoholic | Regular      | High Class   |
| Occasionally  | No Exercise      | Non Alcoholic | Occasionally | High Class   |
| Occasionally  | Regular Exercise | Non Alcoholic | Regular      | Middle Class |
| Occasionally  | No Exercise      | Occasionally  | Occasionally | High Class   |
| Occasionally  | Regular Exercise | Non Alcoholic | Regular      | Middle Class |
| Occasionally  | Regular Exercise | Non Alcoholic | Regular      | High Class   |
| Not Following | No Exercise      | Non Alcoholic | Occasionally | Poor         |
| Following     | Occasionally     | Non Alcoholic | Regular      | Poor         |
| Not Following | No Exercise      | Non Alcoholic | Regular      | Poor         |
| Occasionally  | No Exercise      | Occasionally  | Regular      | Poor         |
| Following     | Regular Exercise | Non Alcoholic | Occasionally | Poor         |
| Following     | Regular Exercise | Non Alcoholic | Non Smoker   | High Class   |
| Not Following | Regular Exercise | Non Alcoholic | Regular      | High Class   |
| Not Following | Regular Exercise | Non Alcoholic | Regular      | Poor         |
| Following     | Regular Exercise | Non Alcoholic | Regular      | Poor         |
| Not Following | Regular Exercise | Non Alcoholic | Occasionally | High Class   |
| Not Following | Occasionally     | Non Alcoholic | Regular      | Poor         |
| Following     | No Exercise      | Alcoholic     | Regular      | Middle Class |
| Occasionally  | Regular Exercise | Non Alcoholic | Occasionally | Middle Class |
| Not Following | Regular Exercise | Non Alcoholic | Regular      | Middle Class |
| Following     | Regular Exercise | Non Alcoholic | Occasionally | Poor         |
| Following     | No Exercise      | Non Alcoholic | Regular      | Poor         |
| Not Following | Regular Exercise | Non Alcoholic | Regular      | High Class   |
| Not Following | No Exercise      | Non Alcoholic | Occasionally | Middle Class |
| Not Following | Regular Exercise | Non Alcoholic | Regular      | Poor         |
| Not Following | Occasionally     | Non Alcoholic | Regular      | Poor         |
| Occasionally  | Regular Exercise | Non Alcoholic | Regular      | Middle Class |
| Following     | No Exercise      | Non Alcoholic | Occasionally | Middle Class |
| Occasionally  | Regular Exercise | Non Alcoholic | Regular      | High Class   |
| Following     | Occasionally     | Non Alcoholic | Regular      | High Class   |
| Occasionally  | Regular Exercise | Alcoholic     | Regular      | High Class   |
| Following     | No Exercise      | Non Alcoholic | Regular      | Poor         |



|               |                  |               |              |              |
|---------------|------------------|---------------|--------------|--------------|
| Occasionally  | Regular Exercise | Non Alcoholic | Non Smoker   | Poor         |
| Occasionally  | No Exercise      | Non Alcoholic | Regular      | High Class   |
| Following     | Occasionally     | Non Alcoholic | Regular      | Middle Class |
| Following     | No Exercise      | Non Alcoholic | Occasionally | High Class   |
| Occasionally  | Regular Exercise | Alcoholic     | Regular      | Middle Class |
| Occasionally  | Occasionally     | Non Alcoholic | Occasionally | High Class   |
| Occasionally  | Regular Exercise | Non Alcoholic | Regular      | High Class   |
| Not Following | Regular Exercise | Non Alcoholic | Regular      | High Class   |
| Not Following | Regular Exercise | Non Alcoholic | Occasionally | High Class   |
| Not Following | No Exercise      | Non Alcoholic | Regular      | High Class   |
| Not Following | Occasionally     | Non Alcoholic | Regular      | Poor         |
| Not Following | No Exercise      | Occasionally  | Regular      | High Class   |
| Following     | Occasionally     | Non Alcoholic | Occasionally | High Class   |
| Following     | No Exercise      | Non Alcoholic | Regular      | High Class   |
| Following     | No Exercise      | Non Alcoholic | Regular      | High Class   |
| Not Following | No Exercise      | Occasionally  | Regular      | High Class   |
| Following     | Occasionally     | Non Alcoholic | Regular      | Middle Class |
| Not Following | Regular Exercise | Non Alcoholic | Occasionally | High Class   |
| Following     | Occasionally     | Non Alcoholic | Regular      | Middle Class |
| Not Following | Regular Exercise | Non Alcoholic | Regular      | Poor         |
| Not Following | No Exercise      | Occasionally  | Occasionally | High Class   |
| Following     | No Exercise      | Non Alcoholic | Regular      | Middle Class |
| Following     | Regular Exercise | Non Alcoholic | Occasionally | Poor         |
| Not Following | No Exercise      | Occasionally  | Regular      | Poor         |
| Following     | Regular Exercise | Non Alcoholic | Regular      | Poor         |
| Following     | Regular Exercise | Occasionally  | Occasionally | Poor         |
| Following     | Regular Exercise | Occasionally  | Regular      | Poor         |
| Following     | Regular Exercise | Non Alcoholic | Regular      | High Class   |
| Not Following | Regular Exercise | Non Alcoholic | Regular      | Poor         |
| Not Following | Occasionally     | Non Alcoholic | Occasionally | High Class   |
| Not Following | No Exercise      | Non Alcoholic | Regular      | Poor         |
| Following     | No Exercise      | Non Alcoholic | Regular      | Poor         |
| Not Following | No Exercise      | Non Alcoholic | Regular      | High Class   |
| Following     | Regular Exercise | Non Alcoholic | Regular      | Middle Class |
| Following     | No Exercise      | Non Alcoholic | Occasionally | Middle Class |
| Not Following | No Exercise      | Non Alcoholic | Regular      | Middle Class |
| Not Following | No Exercise      | Non Alcoholic | Regular      | Poor         |
| Following     | Occasionally     | Non Alcoholic | Occasionally | High Class   |
| Not Following | Regular Exercise | Non Alcoholic | Regular      | Middle Class |
| Following     | Regular Exercise | Non Alcoholic | Occasionally | Poor         |
| Following     | Regular Exercise | Non Alcoholic | Regular      | Poor         |
| Not Following | Regular Exercise | Non Alcoholic | Regular      | High Class   |
| Not Following | Occasionally     | Non Alcoholic | Occasionally | Poor         |
| Not Following | Regular Exercise | Non Alcoholic | Regular      | Poor         |
| Not Following | Regular Exercise | Occasionally  | Regular      | Middle Class |
| Not Following | No Exercise      | Occasionally  | Regular      | Poor         |
| Not Following | Occasionally     | Non Alcoholic | Occasionally | Poor         |

|               |                  |               |              |              |
|---------------|------------------|---------------|--------------|--------------|
| Following     | No Exercise      | Non Alcoholic | Regular      | High Class   |
| Not Following | Occasionally     | Non Alcoholic | Regular      | High Class   |
| Not Following | No Exercise      | Non Alcoholic | Regular      | Poor         |
| Following     | No Exercise      | Non Alcoholic | Regular      | Poor         |
| Not Following | Regular Exercise | Non Alcoholic | Occasionally | Poor         |
| Not Following | Regular Exercise | Non Alcoholic | Regular      | Poor         |
| Following     | No Exercise      | Non Alcoholic | Regular      | Poor         |
| Not Following | Regular Exercise | Non Alcoholic | Non Smoker   | High Class   |
| Not Following | Regular Exercise | Occasionally  | Regular      | High Class   |
| Not Following | Regular Exercise | Non Alcoholic | Occasionally | High Class   |
| Not Following | Regular Exercise | Non Alcoholic | Regular      | Middle Class |
| Following     | Regular Exercise | Non Alcoholic | Regular      | High Class   |
| Following     | Regular Exercise | Non Alcoholic | Occasionally | Poor         |
| Following     | No Exercise      | Non Alcoholic | Regular      | Poor         |
| Following     | No Exercise      | Non Alcoholic | Regular      | Poor         |
| Following     | Regular Exercise | Non Alcoholic | Regular      | Poor         |
| Not Following | No Exercise      | Occasionally  | Occasionally | High Class   |
| Following     | Regular Exercise | Non Alcoholic | Regular      | High Class   |
| Not Following | No Exercise      | Non Alcoholic | Regular      | High Class   |
| Following     | No Exercise      | Non Alcoholic | Regular      | High Class   |
| Following     | No Exercise      | Non Alcoholic | Regular      | Middle Class |
| Occasionally  | Occasionally     | Non Alcoholic | Occasionally | Middle Class |
| Not Following | Regular Exercise | Non Alcoholic | Regular      | Middle Class |
| Not Following | Regular Exercise | Non Alcoholic | Regular      | Middle Class |
| Not Following | No Exercise      | Non Alcoholic | Occasionally | Middle Class |
| Occasionally  | Regular Exercise | Non Alcoholic | Regular      | High Class   |
| Occasionally  | No Exercise      | Occasionally  | Occasionally | High Class   |
| Not Following | Regular Exercise | Non Alcoholic | Regular      | High Class   |
| Occasionally  | No Exercise      | Non Alcoholic | Non Smoker   | Poor         |
| Not Following | Regular Exercise | Non Alcoholic | Occasionally | Poor         |
| Occasionally  | No Exercise      | Non Alcoholic | Regular      | Middle Class |
| Occasionally  | Regular Exercise | Non Alcoholic | Regular      | Poor         |
| Not Following | Regular Exercise | Non Alcoholic | Regular      | Middle Class |
| Not Following | Regular Exercise | Occasionally  | Occasionally | Poor         |
| Occasionally  | No Exercise      | Non Alcoholic | Regular      | Poor         |
| Following     | Regular Exercise | Non Alcoholic | Regular      | Middle Class |
| Following     | No Exercise      | Non Alcoholic | Regular      | Poor         |
| Following     | Regular Exercise | Non Alcoholic | Regular      | High Class   |
| Not Following | Regular Exercise | Non Alcoholic | Occasionally | High Class   |
| Not Following | Regular Exercise | Non Alcoholic | Regular      | High Class   |
| Not Following | Regular Exercise | Non Alcoholic | Regular      | Poor         |
| Occasionally  | Regular Exercise | Alcoholic     | Occasionally | Middle Class |
| Occasionally  | No Exercise      | Non Alcoholic | Regular      | High Class   |
| Following     | No Exercise      | Non Alcoholic | Occasionally | Poor         |
| Following     | No Exercise      | Non Alcoholic | Regular      | Poor         |
| Following     | No Exercise      | Non Alcoholic | Regular      | Poor         |
| Occasionally  | Regular Exercise | Non Alcoholic | Occasionally | Poor         |

|                        |                  |               |              |              |
|------------------------|------------------|---------------|--------------|--------------|
| Occasionally Following | No Exercise      | Non Alcoholic | Regular      | Poor         |
| Occasionally Following | Regular Exercise | Non Alcoholic | Regular      | Poor         |
| Occasionally           | No Exercise      | Non Alcoholic | Regular      | Middle Class |
| Occasionally           | Regular Exercise | Non Alcoholic | Occasionally | Middle Class |
| Occasionally           | No Exercise      | Non Alcoholic | Regular      | Middle Class |
| Occasionally           | Regular Exercise | Non Alcoholic | Regular      | High Class   |
| Occasionally           | No Exercise      | Non Alcoholic | Regular      | High Class   |
| Occasionally           | No Exercise      | Non Alcoholic | Regular      | High Class   |
| Occasionally           | Regular Exercise | Alcoholic     | Occasionally | High Class   |
| Occasionally           | No Exercise      | Non Alcoholic | Regular      | High Class   |
| Occasionally           | Regular Exercise | Non Alcoholic | Regular      | High Class   |
| Occasionally           | No Exercise      | Non Alcoholic | Occasionally | Middle Class |
| Occasionally Following | Regular Exercise | Non Alcoholic | Regular      | Poor         |
| Occasionally Following | Regular Exercise | Non Alcoholic | Occasionally | Poor         |
| Not Following          | No Exercise      | Non Alcoholic | Regular      | Poor         |
| Not Following          | Regular Exercise | Non Alcoholic | Regular      | Poor         |
| Not Following          | No Exercise      | Non Alcoholic | Occasionally | Middle Class |
| Following              | Regular Exercise | Non Alcoholic | Regular      | Middle Class |
| Not Following          | No Exercise      | Non Alcoholic | Regular      | Middle Class |
| Following              | Regular Exercise | Non Alcoholic | Regular      | Middle Class |
| Not Following          | No Exercise      | Non Alcoholic | Occasionally | Middle Class |
| Following              | Regular Exercise | Non Alcoholic | Regular      | Middle Class |
| Following              | Regular Exercise | Non Alcoholic | Regular      | High Class   |
| Not Following          | No Exercise      | Non Alcoholic | Regular      | High Class   |
| Not Following          | Regular Exercise | Non Alcoholic | Regular      | High Class   |
| Following              | Regular Exercise | Non Alcoholic | Occasionally | High Class   |
| Following              | No Exercise      | Non Alcoholic | Regular      | High Class   |
| Following              | Occasionally     | Non Alcoholic | Regular      | Poor         |
| Not Following          | Regular Exercise | Non Alcoholic | Regular      | Poor         |
| Not Following          | No Exercise      | Occasionally  | Regular      | Poor         |
| Not Following          | Regular Exercise | Occasionally  | Regular      | High Class   |
| Not Following          | No Exercise      | Occasionally  | Occasionally | High Class   |
| Following              | Regular Exercise | Non Alcoholic | Non Smoker   | High Class   |
| Following              | Occasionally     | Non Alcoholic | Regular      | High Class   |
| Following              | Regular Exercise | Occasionally  | Occasionally | High Class   |
| Not Following          | No Exercise      | Non Alcoholic | Regular      | Poor         |
| Following              | Regular Exercise | Non Alcoholic | Occasionally | Poor         |
| Not Following          | No Exercise      | Occasionally  | Regular      | High Class   |
| Following              | Occasionally     | Non Alcoholic | Regular      | High Class   |
| Not Following          | Regular Exercise | Non Alcoholic | Occasionally | High Class   |
| Not Following          | No Exercise      | Non Alcoholic | Regular      | High Class   |
| Following              | No Exercise      | Non Alcoholic | Regular      | Middle Class |
| Not Following          | Regular Exercise | Non Alcoholic | Regular      | Middle Class |
| Following              | Regular Exercise | Non Alcoholic | Occasionally | Middle Class |
| Not Following          | Regular Exercise | Non Alcoholic | Regular      | Middle Class |
| Not Following          | Regular Exercise | Non Alcoholic | Regular      | High Class   |
| Following              | Regular Exercise | Occasionally  | Regular      | Middle Class |

|               |                  |               |              |              |
|---------------|------------------|---------------|--------------|--------------|
| Not Following | Occasionally     | Non Alcoholic | Regular      | Middle Class |
| Following     | Occasionally     | Non Alcoholic | Occasionally | High Class   |
| Not Following | Occasionally     | Non Alcoholic | Regular      | Middle Class |
| Occasionally  | Regular Exercise | Non Alcoholic | Regular      | Middle Class |
| Occasionally  | Occasionally     | Non Alcoholic | Occasionally | Poor         |
| Following     | Occasionally     | Non Alcoholic | Regular      | Poor         |
| Occasionally  | Regular Exercise | Occasionally  | Non Smoker   | High Class   |
| Following     | No Exercise      | Non Alcoholic | Regular      | High Class   |
| Occasionally  | No Exercise      | Non Alcoholic | Regular      | High Class   |
| Following     | Regular Exercise | Non Alcoholic | Occasionally | High Class   |
| Occasionally  | Regular Exercise | Non Alcoholic | Regular      | Poor         |
| Following     | Regular Exercise | Alcoholic     | Regular      | Poor         |
| Not Following | Regular Exercise | Non Alcoholic | Regular      | Poor         |
| Not Following | Regular Exercise | Occasionally  | Occasionally | High Class   |
| Not Following | No Exercise      | Non Alcoholic | Regular      | High Class   |
| Not Following | Regular Exercise | Non Alcoholic | Regular      | High Class   |
| Not Following | No Exercise      | Non Alcoholic | Regular      | High Class   |
| Not Following | Regular Exercise | Non Alcoholic | Regular      | High Class   |
| Following     | Regular Exercise | Non Alcoholic | Occasionally | Poor         |
| Not Following | No Exercise      | Non Alcoholic | Regular      | High Class   |
| Following     | No Exercise      | Non Alcoholic | Regular      | Middle Class |
| Not Following | No Exercise      | Non Alcoholic | Occasionally | Middle Class |
| Not Following | Regular Exercise | Non Alcoholic | Regular      | Poor         |
| Not Following | No Exercise      | Occasionally  | Occasionally | Middle Class |
| Following     | Regular Exercise | Non Alcoholic | Regular      | Poor         |
| Following     | No Exercise      | Non Alcoholic | Regular      | Poor         |
| Occasionally  | Regular Exercise | Non Alcoholic | Occasionally | High Class   |
| Following     | No Exercise      | Non Alcoholic | Regular      | Poor         |
| Occasionally  | Regular Exercise | Non Alcoholic | Regular      | High Class   |
| Not Following | No Exercise      | Occasionally  | Regular      | Middle Class |
| Following     | Regular Exercise | Non Alcoholic | Occasionally | Poor         |
| Not Following | Regular Exercise | Non Alcoholic | Regular      | Poor         |
| Following     | Regular Exercise | Non Alcoholic | Regular      | High Class   |
| Following     | Regular Exercise | Non Alcoholic | Regular      | High Class   |
| Occasionally  | Regular Exercise | Non Alcoholic | Regular      | Middle Class |
| Occasionally  | Regular Exercise | Alcoholic     | Occasionally | High Class   |
| Occasionally  | No Exercise      | Non Alcoholic | Regular      | High Class   |
| Occasionally  | Regular Exercise | Non Alcoholic | Regular      | High Class   |
| Occasionally  | No Exercise      | Non Alcoholic | Occasionally | Poor         |
| Occasionally  | Regular Exercise | Non Alcoholic | Regular      | Middle Class |
| Occasionally  | No Exercise      | Non Alcoholic | Occasionally | Poor         |
| Occasionally  | Regular Exercise | Occasionally  | Regular      | Middle Class |
| Occasionally  | Regular Exercise | Non Alcoholic | Regular      | Poor         |
| Occasionally  | Regular Exercise | Non Alcoholic | Occasionally | Poor         |
| Occasionally  | Regular Exercise | Non Alcoholic | Regular      | Poor         |
| Occasionally  | No Exercise      | Non Alcoholic | Regular      | Middle Class |
| Not Following | No Exercise      | Non Alcoholic | Regular      | Middle Class |

|               |                  |               |              |              |
|---------------|------------------|---------------|--------------|--------------|
| Following     | No Exercise      | Alcoholic     | Occasionally | Middle Class |
| Not Following | Regular Exercise | Non Alcoholic | Regular      | Middle Class |
| Not Following | No Exercise      | Non Alcoholic | Regular      | High Class   |
| Following     | Regular Exercise | Non Alcoholic | Regular      | High Class   |
| Occasionally  | Regular Exercise | Non Alcoholic | Regular      | High Class   |
| Not Following | Regular Exercise | Non Alcoholic | Occasionally | High Class   |
| Not Following | No Exercise      | Non Alcoholic | Regular      | High Class   |
| Occasionally  | No Exercise      | Non Alcoholic | Regular      | High Class   |
| Occasionally  | Regular Exercise | Occasionally  | Occasionally | High Class   |
| Not Following | No Exercise      | Alcoholic     | Non Smoker   | Middle Class |
| Occasionally  | No Exercise      | Non Alcoholic | Occasionally | Middle Class |
| Following     | Regular Exercise | Non Alcoholic | Regular      | Middle Class |
| Following     | Regular Exercise | Non Alcoholic | Regular      | High Class   |
| Not Following | No Exercise      | Non Alcoholic | Occasionally | High Class   |
| Following     | No Exercise      | Non Alcoholic | Regular      | High Class   |
| Following     | Regular Exercise | Non Alcoholic | Regular      | High Class   |
| Following     | No Exercise      | Non Alcoholic | Regular      | High Class   |
| Following     | Regular Exercise | Occasionally  | Occasionally | High Class   |
| Following     | No Exercise      | Non Alcoholic | Regular      | High Class   |
| Following     | Regular Exercise | Non Alcoholic | Regular      | Middle Class |
| Following     | Regular Exercise | Non Alcoholic | Regular      | Middle Class |
| Following     | No Exercise      | Occasionally  | Regular      | Middle Class |
| Following     | No Exercise      | Non Alcoholic | Occasionally | High Class   |
| Following     | No Exercise      | Non Alcoholic | Regular      | High Class   |
| Following     | Regular Exercise | Non Alcoholic | Regular      | Middle Class |
| Not Following | No Exercise      | Non Alcoholic | Occasionally | High Class   |
| Not Following | Regular Exercise | Non Alcoholic | Regular      | Middle Class |
| Following     | No Exercise      | Non Alcoholic | Occasionally | High Class   |
| Not Following | Regular Exercise | Non Alcoholic | Regular      | Poor         |
| Following     | Occasionally     | Occasionally  | Regular      | Poor         |
| Following     | Regular Exercise | Non Alcoholic | Occasionally | Poor         |
| Following     | No Exercise      | Non Alcoholic | Regular      | Poor         |
| Not Following | No Exercise      | Non Alcoholic | Regular      | Poor         |
| Following     | Regular Exercise | Non Alcoholic | Regular      | Poor         |
| Not Following | Regular Exercise | Non Alcoholic | Occasionally | Middle Class |
| Following     | Regular Exercise | Non Alcoholic | Regular      | Middle Class |
| Following     | Regular Exercise | Occasionally  | Regular      | Middle Class |
| Not Following | Occasionally     | Non Alcoholic | Regular      | Middle Class |
| Not Following | No Exercise      | Occasionally  | Non Smoker   | High Class   |
| Not Following | Regular Exercise | Non Alcoholic | Occasionally | Poor         |
| Following     | Regular Exercise | Non Alcoholic | Regular      | Poor         |
| Following     | Regular Exercise | Non Alcoholic | Regular      | High Class   |
| Following     | No Exercise      | Non Alcoholic | Occasionally | Middle Class |
| Not Following | Regular Exercise | Non Alcoholic | Regular      | Middle Class |
| Not Following | Regular Exercise | Non Alcoholic | Occasionally | Middle Class |
| Following     | Regular Exercise | Non Alcoholic | Regular      | High Class   |
| Following     | Occasionally     | Non Alcoholic | Regular      | High Class   |

|               |                  |               |              |              |
|---------------|------------------|---------------|--------------|--------------|
| Not Following | No Exercise      | Alcoholic     | Occasionally | High Class   |
| Not Following | No Exercise      | Non Alcoholic | Regular      | Poor         |
| Not Following | No Exercise      | Non Alcoholic | Regular      | Poor         |
| Not Following | Regular Exercise | Non Alcoholic | Regular      | Poor         |
| Occasionally  | No Exercise      | Non Alcoholic | Occasionally | High Class   |
| Occasionally  | Regular Exercise | Non Alcoholic | Regular      | Poor         |
| Not Following | No Exercise      | Non Alcoholic | Regular      | Poor         |
| Not Following | Regular Exercise | Occasionally  | Regular      | Middle Class |
| Not Following | No Exercise      | Non Alcoholic | Regular      | High Class   |
| Occasionally  | Regular Exercise | Non Alcoholic | Occasionally | High Class   |
| Not Following | Occasionally     | Non Alcoholic | Regular      | Poor         |
| Not Following | Regular Exercise | Alcoholic     | Regular      | High Class   |
| Following     | No Exercise      | Non Alcoholic | Non Smoker   | High Class   |
| Following     | Regular Exercise | Non Alcoholic | Regular      | High Class   |
| Not Following | Regular Exercise | Non Alcoholic | Occasionally | Middle Class |
| Not Following | No Exercise      | Non Alcoholic | Regular      | High Class   |
| Following     | No Exercise      | Non Alcoholic | Regular      | Poor         |
| Not Following | Regular Exercise | Non Alcoholic | Occasionally | High Class   |
| Not Following | No Exercise      | Non Alcoholic | Regular      | Poor         |
| Not Following | Regular Exercise | Non Alcoholic | Regular      | Poor         |
| Following     | No Exercise      | Non Alcoholic | Regular      | High Class   |
| Following     | Regular Exercise | Non Alcoholic | Occasionally | Poor         |
| Following     | Regular Exercise | Non Alcoholic | Regular      | Poor         |
| Not Following | Regular Exercise | Occasionally  | Regular      | High Class   |
| Not Following | No Exercise      | Non Alcoholic | Regular      | Middle Class |
| Occasionally  | Regular Exercise | Non Alcoholic | Regular      | High Class   |
| Following     | No Exercise      | Non Alcoholic | Occasionally | Middle Class |
| Occasionally  | No Exercise      | Non Alcoholic | Regular      | Middle Class |
| Occasionally  | Regular Exercise | Non Alcoholic | Regular      | High Class   |
| Following     | No Exercise      | Non Alcoholic | Occasionally | High Class   |
| Not Following | No Exercise      | Non Alcoholic | Regular      | Poor         |
| Not Following | Regular Exercise | Non Alcoholic | Occasionally | Poor         |
| Following     | Regular Exercise | Non Alcoholic | Regular      | Poor         |
| Not Following | No Exercise      | Non Alcoholic | Regular      | Middle Class |
| Not Following | Regular Exercise | Non Alcoholic | Occasionally | High Class   |
| Not Following | Regular Exercise | Non Alcoholic | Regular      | High Class   |
| Not Following | No Exercise      | Non Alcoholic | Regular      | High Class   |
| Not Following | Regular Exercise | Non Alcoholic | Regular      | Poor         |
| Not Following | No Exercise      | Non Alcoholic | Occasionally | Poor         |
| Occasionally  | Regular Exercise | Non Alcoholic | Regular      | Poor         |
| Occasionally  | Regular Exercise | Non Alcoholic | Regular      | High Class   |
| Occasionally  | No Exercise      | Non Alcoholic | Regular      | Poor         |
| Occasionally  | Regular Exercise | Alcoholic     | Regular      | Poor         |
| Not Following | Regular Exercise | Non Alcoholic | Occasionally | High Class   |
| Not Following | Regular Exercise | Non Alcoholic | Regular      | Middle Class |
| Not Following | No Exercise      | Occasionally  | Regular      | Middle Class |
| Not Following | Regular Exercise | Occasionally  | Occasionally | High Class   |

|               |                  |               |              |              |
|---------------|------------------|---------------|--------------|--------------|
| Not Following | No Exercise      | Non Alcoholic | Regular      | High Class   |
| Occasionally  | Regular Exercise | Non Alcoholic | Occasionally | Poor         |
| Not Following | No Exercise      | Non Alcoholic | Regular      | Poor         |
| Following     | Regular Exercise | Non Alcoholic | Regular      | Poor         |
| Following     | No Exercise      | Non Alcoholic | Occasionally | Middle Class |
| Following     | Regular Exercise | Non Alcoholic | Regular      | High Class   |
| Following     | Regular Exercise | Non Alcoholic | Regular      | High Class   |
| Not Following | Regular Exercise | Non Alcoholic | Regular      | Middle Class |
| Occasionally  | Regular Exercise | Non Alcoholic | Occasionally | Middle Class |
| Following     | Occasionally     | Non Alcoholic | Regular      | Poor         |
| Following     | Regular Exercise | Occasionally  | Occasionally | High Class   |
| Not Following | No Exercise      | Non Alcoholic | Regular      | High Class   |
| Not Following | No Exercise      | Occasionally  | Regular      | High Class   |
| Not Following | Regular Exercise | Non Alcoholic | Occasionally | High Class   |
| Not Following | Regular Exercise | Non Alcoholic | Regular      | High Class   |
| Not Following | No Exercise      | Non Alcoholic | Occasionally | Middle Class |
| Following     | No Exercise      | Non Alcoholic | Regular      | Poor         |
| Following     | Occasionally     | Occasionally  | Regular      | High Class   |
| Following     | No Exercise      | Non Alcoholic | Occasionally | High Class   |
| Following     | Regular Exercise | Non Alcoholic | Regular      | Middle Class |
| Following     | No Exercise      | Non Alcoholic | Regular      | High Class   |
| Not Following | Regular Exercise | Non Alcoholic | Regular      | High Class   |
| Following     | Regular Exercise | Non Alcoholic | Occasionally | Poor         |
| Occasionally  | No Exercise      | Non Alcoholic | Regular      | Poor         |
| Occasionally  | Occasionally     | Non Alcoholic | Non Smoker   | Middle Class |
| Occasionally  | No Exercise      | Non Alcoholic | Regular      | Middle Class |
| Occasionally  | Regular Exercise | Non Alcoholic | Regular      | Middle Class |
| Not Following | No Exercise      | Non Alcoholic | Occasionally | Middle Class |
| Following     | Regular Exercise | Occasionally  | Regular      | Middle Class |
| Following     | No Exercise      | Non Alcoholic | Regular      | High Class   |
| Following     | Regular Exercise | Non Alcoholic | Occasionally | High Class   |
| Following     | Occasionally     | Non Alcoholic | Regular      | Middle Class |
| Not Following | Regular Exercise | Non Alcoholic | Occasionally | Middle Class |
| Not Following | Occasionally     | Non Alcoholic | Regular      | High Class   |
| Not Following | No Exercise      | Non Alcoholic | Regular      | Poor         |
| Following     | Regular Exercise | Non Alcoholic | Occasionally | Poor         |
| Following     | Regular Exercise | Non Alcoholic | Regular      | High Class   |
| Following     | Regular Exercise | Non Alcoholic | Regular      | High Class   |
| Not Following | Regular Exercise | Occasionally  | Regular      | Poor         |
| Following     | Occasionally     | Non Alcoholic | Occasionally | Middle Class |
| Following     | No Exercise      | Non Alcoholic | Regular      | Poor         |
| Following     | Regular Exercise | Non Alcoholic | Regular      | Poor         |
| Following     | Regular Exercise | Non Alcoholic | Regular      | Middle Class |
| Not Following | Regular Exercise | Non Alcoholic | Regular      | Poor         |
| Occasionally  | No Exercise      | Non Alcoholic | Occasionally | Middle Class |
| Not Following | Regular Exercise | Occasionally  | Non Smoker   | Middle Class |
| Not Following | Regular Exercise | Non Alcoholic | Regular      | Poor         |

|               |                  |               |              |              |
|---------------|------------------|---------------|--------------|--------------|
| Occasionally  | Occasionally     | Non Alcoholic | Occasionally | Middle Class |
| Occasionally  | Regular Exercise | Non Alcoholic | Regular      | Poor         |
| Following     | No Exercise      | Non Alcoholic | Occasionally | Poor         |
| Following     | No Exercise      | Non Alcoholic | Regular      | High Class   |
| Not Following | No Exercise      | Non Alcoholic | Regular      | Poor         |
| Occasionally  | Regular Exercise | Non Alcoholic | Occasionally | High Class   |
| Occasionally  | No Exercise      | Occasionally  | Regular      | High Class   |
| Following     | Occasionally     | Non Alcoholic | Regular      | High Class   |
| Occasionally  | Occasionally     | Non Alcoholic | Regular      | Middle Class |
| Following     | Regular Exercise | Non Alcoholic | Occasionally | Middle Class |
| Occasionally  | No Exercise      | Occasionally  | Regular      | Middle Class |
| Following     | Regular Exercise | Non Alcoholic | Regular      | Middle Class |
| Occasionally  | No Exercise      | Non Alcoholic | Regular      | Middle Class |
| Not Following | Regular Exercise | Non Alcoholic | Regular      | Poor         |
| Following     | Regular Exercise | Non Alcoholic | Occasionally | Poor         |
| Not Following | Regular Exercise | Non Alcoholic | Regular      | High Class   |
| Following     | Regular Exercise | Non Alcoholic | Regular      | Poor         |
| Following     | Regular Exercise | Occasionally  | Regular      | Poor         |
| Not Following | Regular Exercise | Non Alcoholic | Regular      | High Class   |
| Not Following | Regular Exercise | Non Alcoholic | Non Smoker   | High Class   |
| Following     | Regular Exercise | Non Alcoholic | Regular      | High Class   |
| Not Following | No Exercise      | Non Alcoholic | Regular      | Poor         |
| Not Following | Regular Exercise | Non Alcoholic | Occasionally | High Class   |
| Not Following | No Exercise      | Non Alcoholic | Non Smoker   | Poor         |
| Not Following | Regular Exercise | Non Alcoholic | Occasionally | Poor         |
| Occasionally  | No Exercise      | Non Alcoholic | Regular      | High Class   |
| Occasionally  | Regular Exercise | Non Alcoholic | Regular      | Poor         |
| Not Following | No Exercise      | Non Alcoholic | Occasionally | Poor         |
| Not Following | Regular Exercise | Non Alcoholic | Regular      | Middle Class |
| Occasionally  | No Exercise      | Occasionally  | Regular      | High Class   |
| Occasionally  | No Exercise      | Occasionally  | Regular      | Middle Class |
| Occasionally  | Regular Exercise | Non Alcoholic | Occasionally | Poor         |
| Occasionally  | Regular Exercise | Non Alcoholic | Regular      | Poor         |
| Occasionally  | No Exercise      | Non Alcoholic | Regular      | High Class   |
| Occasionally  | Regular Exercise | Non Alcoholic | Regular      | High Class   |
| Occasionally  | No Exercise      | Non Alcoholic | Regular      | High Class   |
| Occasionally  | No Exercise      | Non Alcoholic | Regular      | High Class   |
| Occasionally  | No Exercise      | Non Alcoholic | Occasionally | High Class   |
| Occasionally  | Regular Exercise | Non Alcoholic | Regular      | High Class   |
| Occasionally  | Regular Exercise | Non Alcoholic | Regular      | High Class   |
| Occasionally  | No Exercise      | Non Alcoholic | Occasionally | High Class   |
| Occasionally  | No Exercise      | Non Alcoholic | Regular      | Poor         |
| Occasionally  | Regular Exercise | Non Alcoholic | Occasionally | Poor         |
| Occasionally  | No Exercise      | Non Alcoholic | Regular      | Poor         |
| Occasionally  | Regular Exercise | Alcoholic     | Regular      | High Class   |
| Occasionally  | Occasionally     | Non Alcoholic | Occasionally | High Class   |
| Not Following | Regular Exercise | Non Alcoholic | Regular      | Poor         |
| Following     | No Exercise      | Non Alcoholic | Regular      | Poor         |



|               |                  |               |              |              |
|---------------|------------------|---------------|--------------|--------------|
| Following     | Regular Exercise | Non Alcoholic | Regular      | High Class   |
| Occasionally  | No Exercise      | Non Alcoholic | Occasionally | Poor         |
| Following     | Regular Exercise | Non Alcoholic | Regular      | High Class   |
| Following     | No Exercise      | Non Alcoholic | Regular      | Poor         |
| Not Following | Regular Exercise | Non Alcoholic | Regular      | Poor         |
| Not Following | Regular Exercise | Non Alcoholic | Regular      | High Class   |
| Following     | Occasionally     | Non Alcoholic | Occasionally | Middle Class |
| Not Following | Regular Exercise | Non Alcoholic | Regular      | Poor         |
| Not Following | Regular Exercise | Alcoholic     | Regular      | High Class   |
| Following     | Regular Exercise | Non Alcoholic | Occasionally | High Class   |
| Following     | No Exercise      | Non Alcoholic | Regular      | Poor         |
| Following     | Occasionally     | Non Alcoholic | Occasionally | High Class   |
| Following     | No Exercise      | Non Alcoholic | Regular      | Poor         |
| Not Following | Regular Exercise | Non Alcoholic | Regular      | Poor         |
| Following     | Regular Exercise | Non Alcoholic | Occasionally | Poor         |
| Following     | Regular Exercise | Non Alcoholic | Regular      | Poor         |
| Following     | Regular Exercise | Non Alcoholic | Regular      | Middle Class |
| Occasionally  | Occasionally     | Non Alcoholic | Regular      | Middle Class |
| Following     | Regular Exercise | Non Alcoholic | Occasionally | Poor         |
| Following     | Regular Exercise | Non Alcoholic | Regular      | High Class   |
| Occasionally  | No Exercise      | Occasionally  | Regular      | High Class   |
| Following     | Regular Exercise | Non Alcoholic | Regular      | Middle Class |
| Following     | No Exercise      | Non Alcoholic | Non Smoker   | High Class   |
| Occasionally  | Regular Exercise | Alcoholic     | Occasionally | Poor         |
| Following     | No Exercise      | Non Alcoholic | Regular      | Poor         |
| Following     | Regular Exercise | Non Alcoholic | Regular      | Poor         |
| Occasionally  | Regular Exercise | Non Alcoholic | Occasionally | Poor         |
| Not Following | No Exercise      | Non Alcoholic | Regular      | Poor         |
| Following     | Regular Exercise | Non Alcoholic | Occasionally | High Class   |
| Not Following | No Exercise      | Non Alcoholic | Regular      | Poor         |
| Not Following | Regular Exercise | Non Alcoholic | Regular      | Poor         |
| Following     | No Exercise      | Non Alcoholic | Occasionally | Middle Class |
| Occasionally  | No Exercise      | Non Alcoholic | Regular      | Middle Class |
| Not Following | No Exercise      | Non Alcoholic | Regular      | High Class   |
| Occasionally  | Regular Exercise | Non Alcoholic | Regular      | Poor         |
| Not Following | No Exercise      | Non Alcoholic | Occasionally | Middle Class |
| Not Following | Regular Exercise | Non Alcoholic | Regular      | High Class   |
| Not Following | No Exercise      | Non Alcoholic | Regular      | Poor         |
| Occasionally  | Regular Exercise | Occasionally  | Regular      | High Class   |
| Occasionally  | Regular Exercise | Occasionally  | Regular      | Middle Class |
| Following     | Regular Exercise | Non Alcoholic | Occasionally | Middle Class |
| Following     | Regular Exercise | Non Alcoholic | Regular      | Middle Class |
| Not Following | Regular Exercise | Non Alcoholic | Regular      | High Class   |
| Not Following | No Exercise      | Non Alcoholic | Occasionally | Poor         |
| Not Following | Regular Exercise | Non Alcoholic | Regular      | High Class   |
| Occasionally  | Regular Exercise | Non Alcoholic | Occasionally | High Class   |
| Not Following | No Exercise      | Non Alcoholic | Regular      | Middle Class |

|               |                  |               |              |              |
|---------------|------------------|---------------|--------------|--------------|
| Occasionally  | Regular Exercise | Non Alcoholic | Regular      | High Class   |
| Not Following | No Exercise      | Non Alcoholic | Occasionally | High Class   |
| Following     | Regular Exercise | Non Alcoholic | Regular      | High Class   |
| Not Following | No Exercise      | Non Alcoholic | Regular      | Middle Class |
| Following     | Regular Exercise | Non Alcoholic | Regular      | High Class   |
| Following     | No Exercise      | Non Alcoholic | Occasionally | Poor         |
| Following     | Regular Exercise | Non Alcoholic | Regular      | Poor         |
| Not Following | Regular Exercise | Non Alcoholic | Occasionally | Middle Class |
| Occasionally  | No Exercise      | Alcoholic     | Regular      | Poor         |
| Following     | Regular Exercise | Non Alcoholic | Regular      | Poor         |
| Not Following | No Exercise      | Non Alcoholic | Occasionally | Poor         |
| Not Following | Occasionally     | Non Alcoholic | Regular      | Poor         |
| Not Following | No Exercise      | Non Alcoholic | Regular      | High Class   |
| Not Following | No Exercise      | Non Alcoholic | Regular      | High Class   |
| Not Following | Regular Exercise | Non Alcoholic | Occasionally | High Class   |
| Following     | Regular Exercise | Non Alcoholic | Regular      | Poor         |
| Following     | Occasionally     | Alcoholic     | Regular      | High Class   |
| Following     | No Exercise      | Non Alcoholic | Regular      | Poor         |
| Following     | No Exercise      | Non Alcoholic | Regular      | Middle Class |
| Not Following | Regular Exercise | Non Alcoholic | Occasionally | Middle Class |
| Following     | No Exercise      | Occasionally  | Regular      | Middle Class |
| Following     | Regular Exercise | Non Alcoholic | Regular      | Middle Class |
| Not Following | No Exercise      | Non Alcoholic | Occasionally | Middle Class |
| Following     | Regular Exercise | Non Alcoholic | Regular      | Middle Class |
| Not Following | Regular Exercise | Non Alcoholic | Occasionally | High Class   |
| Occasionally  | Regular Exercise | Non Alcoholic | Regular      | High Class   |
| Occasionally  | Regular Exercise | Non Alcoholic | Regular      | High Class   |
| Occasionally  | Regular Exercise | Non Alcoholic | Occasionally | High Class   |
| Occasionally  | No Exercise      | Non Alcoholic | Regular      | Poor         |
| Occasionally  | No Exercise      | Non Alcoholic | Regular      | High Class   |
| Occasionally  | No Exercise      | Non Alcoholic | Regular      | Middle Class |
| Occasionally  | Regular Exercise | Occasionally  | Occasionally | Poor         |
| Occasionally  | No Exercise      | Non Alcoholic | Regular      | Poor         |
| Occasionally  | Regular Exercise | Non Alcoholic | Regular      | Poor         |
| Occasionally  | No Exercise      | Non Alcoholic | Regular      | Poor         |
| Occasionally  | Regular Exercise | Non Alcoholic | Regular      | Middle Class |
| Occasionally  | No Exercise      | Non Alcoholic | Occasionally | Poor         |
| Occasionally  | No Exercise      | Non Alcoholic | Regular      | High Class   |
| Following     | Regular Exercise | Non Alcoholic | Regular      | High Class   |
| Following     | Regular Exercise | Non Alcoholic | Occasionally | Middle Class |
| Occasionally  | Regular Exercise | Non Alcoholic | Regular      | Middle Class |
| Following     | No Exercise      | Non Alcoholic | Occasionally | Middle Class |
| Occasionally  | Regular Exercise | Non Alcoholic | Regular      | Middle Class |
| Occasionally  | No Exercise      | Occasionally  | Regular      | Middle Class |
| Occasionally  | Regular Exercise | Non Alcoholic | Occasionally | High Class   |
| Not Following | Regular Exercise | Non Alcoholic | Regular      | Middle Class |
| Not Following | No Exercise      | Non Alcoholic | Regular      | Poor         |

|               |                  |               |              |              |
|---------------|------------------|---------------|--------------|--------------|
| Following     | Regular Exercise | Non Alcoholic | Regular      | High Class   |
| Not Following | Regular Exercise | Non Alcoholic | Occasionally | Poor         |
| Following     | No Exercise      | Non Alcoholic | Regular      | Middle Class |
| Following     | Regular Exercise | Non Alcoholic | Non Smoker   | High Class   |
| Not Following | No Exercise      | Non Alcoholic | Regular      | Middle Class |
| Following     | Regular Exercise | Non Alcoholic | Regular      | Poor         |
| Not Following | Regular Exercise | Non Alcoholic | Occasionally | Poor         |
| Not Following | Regular Exercise | Non Alcoholic | Regular      | Middle Class |
| Not Following | Regular Exercise | Alcoholic     | Regular      | Middle Class |
| Following     | No Exercise      | Non Alcoholic | Occasionally | Middle Class |
| Not Following | Regular Exercise | Non Alcoholic | Regular      | High Class   |
| Following     | No Exercise      | Non Alcoholic | Occasionally | High Class   |
| Following     | Regular Exercise | Non Alcoholic | Regular      | High Class   |
| Not Following | Regular Exercise | Non Alcoholic | Regular      | Middle Class |
| Following     | No Exercise      | Non Alcoholic | Occasionally | Middle Class |
| Following     | Regular Exercise | Non Alcoholic | Regular      | Middle Class |
| Following     | No Exercise      | Non Alcoholic | Regular      | Middle Class |
| Not Following | Regular Exercise | Non Alcoholic | Regular      | Poor         |
| Occasionally  | Regular Exercise | Non Alcoholic | Occasionally | Poor         |
| Occasionally  | Occasionally     | Non Alcoholic | Regular      | Poor         |
| Following     | No Exercise      | Non Alcoholic | Regular      | High Class   |
| Following     | Occasionally     | Non Alcoholic | Regular      | High Class   |
| Occasionally  | No Exercise      | Alcoholic     | Regular      | High Class   |
| Occasionally  | Regular Exercise | Non Alcoholic | Occasionally | High Class   |
| Following     | Regular Exercise | Non Alcoholic | Regular      | Middle Class |
| Not Following | Regular Exercise | Non Alcoholic | Regular      | High Class   |
| Not Following | No Exercise      | Non Alcoholic | Occasionally | Middle Class |
| Not Following | No Exercise      | Non Alcoholic | Regular      | High Class   |
| Not Following | No Exercise      | Non Alcoholic | Occasionally | Middle Class |
| Following     | No Exercise      | Non Alcoholic | Regular      | High Class   |
| Not Following | Regular Exercise | Non Alcoholic | Regular      | Poor         |
| Following     | Regular Exercise | Non Alcoholic | Occasionally | Poor         |
| Following     | Regular Exercise | Non Alcoholic | Non Smoker   | Middle Class |
| Following     | No Exercise      | Non Alcoholic | Regular      | Middle Class |
| Following     | No Exercise      | Non Alcoholic | Regular      | Middle Class |
| Occasionally  | Regular Exercise | Occasionally  | Occasionally | Middle Class |
| Following     | Regular Exercise | Occasionally  | Regular      | High Class   |
| Following     | Occasionally     | Alcoholic     | Regular      | High Class   |
| Occasionally  | Regular Exercise | Non Alcoholic | Regular      | High Class   |
| Occasionally  | No Exercise      | Non Alcoholic | Regular      | High Class   |
| Following     | Regular Exercise | Non Alcoholic | Occasionally | High Class   |
| Not Following | Regular Exercise | Non Alcoholic | Regular      | Middle Class |
| Not Following | No Exercise      | Non Alcoholic | Regular      | Middle Class |
| Following     | Regular Exercise | Non Alcoholic | Occasionally | Poor         |
| Not Following | No Exercise      | Non Alcoholic | Regular      | Middle Class |
| Not Following | Regular Exercise | Non Alcoholic | Occasionally | Poor         |
| Not Following | No Exercise      | Occasionally  | Regular      | High Class   |

|               |                  |               |              |              |
|---------------|------------------|---------------|--------------|--------------|
| Not Following | Regular Exercise | Non Alcoholic | Regular      | High Class   |
| Following     | Regular Exercise | Non Alcoholic | Occasionally | Poor         |
| Not Following | No Exercise      | Non Alcoholic | Regular      | High Class   |
| Following     | Regular Exercise | Non Alcoholic | Regular      | High Class   |
| Not Following | Regular Exercise | Non Alcoholic | Regular      | High Class   |
| Following     | Regular Exercise | Non Alcoholic | Occasionally | High Class   |
| Following     | Regular Exercise | Non Alcoholic | Non Smoker   | High Class   |
| Not Following | No Exercise      | Non Alcoholic | Regular      | Poor         |
| Following     | No Exercise      | Non Alcoholic | Regular      | Middle Class |
| Following     | Regular Exercise | Non Alcoholic | Regular      | Middle Class |
| Not Following | No Exercise      | Non Alcoholic | Occasionally | Poor         |
| Following     | Regular Exercise | Non Alcoholic | Regular      | Poor         |
| Not Following | Regular Exercise | Non Alcoholic | Regular      | Poor         |
| Following     | Regular Exercise | Alcoholic     | Occasionally | Middle Class |
| Not Following | Regular Exercise | Non Alcoholic | Regular      | Poor         |
| Not Following | Regular Exercise | Non Alcoholic | Occasionally | Poor         |
| Not Following | No Exercise      | Non Alcoholic | Regular      | Poor         |
| Following     | Regular Exercise | Non Alcoholic | Regular      | Poor         |
| Not Following | No Exercise      | Non Alcoholic | Occasionally | Poor         |
| Not Following | Regular Exercise | Non Alcoholic | Regular      | High Class   |
| Following     | Regular Exercise | Non Alcoholic | Regular      | Middle Class |
| Following     | Regular Exercise | Non Alcoholic | Regular      | Middle Class |
| Not Following | Regular Exercise | Non Alcoholic | Occasionally | Middle Class |
| Following     | Regular Exercise | Non Alcoholic | Regular      | High Class   |
| Following     | Regular Exercise | Non Alcoholic | Regular      | High Class   |
| Following     | No Exercise      | Alcoholic     | Regular      | High Class   |
| Not Following | Regular Exercise | Non Alcoholic | Regular      | Middle Class |
| Following     | Regular Exercise | Non Alcoholic | Occasionally | Middle Class |
| Not Following | Regular Exercise | Non Alcoholic | Regular      | Middle Class |
| Following     | No Exercise      | Non Alcoholic | Regular      | Middle Class |
| Following     | No Exercise      | Non Alcoholic | Occasionally | Middle Class |
| Not Following | Regular Exercise | Non Alcoholic | Regular      | Middle Class |
| Not Following | Regular Exercise | Non Alcoholic | Occasionally | Poor         |
| Following     | Regular Exercise | Non Alcoholic | Regular      | Poor         |
| Not Following | No Exercise      | Non Alcoholic | Regular      | High Class   |
| Following     | No Exercise      | Non Alcoholic | Occasionally | High Class   |
| Not Following | Regular Exercise | Non Alcoholic | Regular      | High Class   |
| Not Following | Regular Exercise | Alcoholic     | Regular      | Poor         |
| Following     | Regular Exercise | Non Alcoholic | Regular      | Poor         |
| Not Following | Regular Exercise | Non Alcoholic | Occasionally | Poor         |
| Not Following | Regular Exercise | Non Alcoholic | Regular      | Poor         |
| Occasionally  | Regular Exercise | Alcoholic     | Regular      | Poor         |
| Not Following | Regular Exercise | Non Alcoholic | Regular      | High Class   |
| Not Following | No Exercise      | Non Alcoholic | Regular      | Middle Class |
| Not Following | Regular Exercise | Non Alcoholic | Occasionally | Middle Class |
| Occasionally  | No Exercise      | Non Alcoholic | Regular      | Middle Class |
| Occasionally  | Regular Exercise | Non Alcoholic | Regular      | Middle Class |

|               |                  |               |              |              |
|---------------|------------------|---------------|--------------|--------------|
| Occasionally  | Regular Exercise | Non Alcoholic | Occasionally | Middle Class |
| Not Following | Regular Exercise | Non Alcoholic | Regular      | Middle Class |
| Not Following | Regular Exercise | Non Alcoholic | Occasionally | Middle Class |
| Occasionally  | Regular Exercise | Non Alcoholic | Regular      | Middle Class |
| Not Following | No Exercise      | Non Alcoholic | Regular      | Middle Class |
| Not Following | Regular Exercise | Non Alcoholic | Occasionally | Middle Class |
| Occasionally  | Regular Exercise | Occasionally  | Regular      | Middle Class |
| Occasionally  | Regular Exercise | Non Alcoholic | Regular      | Middle Class |
| Not Following | No Exercise      | Non Alcoholic | Regular      | Middle Class |
| Not Following | Regular Exercise | Non Alcoholic | Non Smoker   | Poor         |
| Following     | Occasionally     | Alcoholic     | Regular      | Poor         |
| Following     | Regular Exercise | Non Alcoholic | Regular      | Poor         |
| Not Following | Regular Exercise | Non Alcoholic | Regular      | Poor         |
| Not Following | Occasionally     | Non Alcoholic | Regular      | Poor         |
| Not Following | Regular Exercise | Non Alcoholic | Occasionally | Poor         |
| Not Following | Regular Exercise | Non Alcoholic | Regular      | Poor         |
| Not Following | Regular Exercise | Non Alcoholic | Regular      | Poor         |
| Following     | Regular Exercise | Non Alcoholic | Occasionally | High Class   |
| Not Following | No Exercise      | Occasionally  | Regular      | High Class   |
| Following     | Regular Exercise | Non Alcoholic | Occasionally | High Class   |
| Not Following | Regular Exercise | Non Alcoholic | Regular      | High Class   |
| Following     | No Exercise      | Non Alcoholic | Regular      | High Class   |
| Following     | Occasionally     | Non Alcoholic | Occasionally | High Class   |
| Following     | Occasionally     | Non Alcoholic | Regular      | Middle Class |
| Not Following | No Exercise      | Non Alcoholic | Regular      | Middle Class |
| Following     | Occasionally     | Non Alcoholic | Regular      | Middle Class |
| Following     | Regular Exercise | Occasionally  | Occasionally | High Class   |
| Following     | No Exercise      | Non Alcoholic | Regular      | High Class   |
| Occasionally  | Regular Exercise | Non Alcoholic | Regular      | High Class   |
| Following     | No Exercise      | Non Alcoholic | Regular      | Poor         |
| Occasionally  | Regular Exercise | Alcoholic     | Regular      | Poor         |
| Following     | Regular Exercise | Non Alcoholic | Occasionally | Middle Class |
| Occasionally  | Regular Exercise | Non Alcoholic | Regular      | High Class   |
| Occasionally  | No Exercise      | Non Alcoholic | Regular      | Middle Class |
| Not Following | Regular Exercise | Non Alcoholic | Regular      | Middle Class |
| Not Following | Regular Exercise | Occasionally  | Regular      | Middle Class |
| Following     | Regular Exercise | Occasionally  | Occasionally | Middle Class |
| Not Following | Regular Exercise | Non Alcoholic | Regular      | High Class   |
| Not Following | Regular Exercise | Non Alcoholic | Regular      | High Class   |
| Not Following | No Exercise      | Non Alcoholic | Non Smoker   | High Class   |
| Occasionally  | Regular Exercise | Non Alcoholic | Occasionally | Poor         |
| Following     | Regular Exercise | Non Alcoholic | Regular      | Poor         |
| Following     | Regular Exercise | Non Alcoholic | Regular      | Middle Class |
| Following     | Regular Exercise | Occasionally  | Regular      | Poor         |
| Following     | No Exercise      | Occasionally  | Regular      | Middle Class |
| Not Following | Regular Exercise | Non Alcoholic | Occasionally | Poor         |
| Following     | No Exercise      | Non Alcoholic | Regular      | Poor         |

|               |                  |               |              |              |
|---------------|------------------|---------------|--------------|--------------|
| Not Following | Regular Exercise | Non Alcoholic | Regular      | Middle Class |
| Not Following | No Exercise      | Non Alcoholic | Occasionally | Poor         |
| Not Following | Regular Exercise | Non Alcoholic | Regular      | High Class   |
| Following     | Regular Exercise | Non Alcoholic | Occasionally | High Class   |
| Not Following | Regular Exercise | Non Alcoholic | Regular      | High Class   |
| Following     | Regular Exercise | Non Alcoholic | Regular      | Poor         |
| Not Following | Regular Exercise | Non Alcoholic | Occasionally | Middle Class |
| Following     | Regular Exercise | Non Alcoholic | Regular      | High Class   |
| Not Following | No Exercise      | Non Alcoholic | Regular      | Poor         |
| Not Following | Regular Exercise | Non Alcoholic | Regular      | Poor         |
| Following     | Regular Exercise | Non Alcoholic | Occasionally | Poor         |
| Not Following | Regular Exercise | Non Alcoholic | Regular      | Poor         |
| Following     | No Exercise      | Non Alcoholic | Regular      | Poor         |
| Following     | No Exercise      | Non Alcoholic | Regular      | Poor         |
| Not Following | Regular Exercise | Non Alcoholic | Regular      | Middle Class |
| Not Following | Regular Exercise | Occasionally  | Occasionally | Middle Class |
| Not Following | No Exercise      | Non Alcoholic | Regular      | Middle Class |
| Not Following | Regular Exercise | Occasionally  | Non Smoker   | High Class   |
| Not Following | No Exercise      | Non Alcoholic | Occasionally | High Class   |
| Not Following | Regular Exercise | Non Alcoholic | Regular      | High Class   |
| Not Following | No Exercise      | Non Alcoholic | Occasionally | High Class   |
| Following     | Regular Exercise | Non Alcoholic | Regular      | High Class   |
| Following     | Regular Exercise | Non Alcoholic | Regular      | High Class   |
| Not Following | Regular Exercise | Non Alcoholic | Occasionally | Middle Class |
| Not Following | No Exercise      | Non Alcoholic | Regular      | Poor         |
| Following     | No Exercise      | Non Alcoholic | Regular      | Poor         |
| Following     | No Exercise      | Non Alcoholic | Regular      | Poor         |
| Following     | Regular Exercise | Alcoholic     | Occasionally | Poor         |
| Following     | Regular Exercise | Non Alcoholic | Regular      | Middle Class |
| Following     | No Exercise      | Non Alcoholic | Regular      | Middle Class |
| Not Following | Regular Exercise | Non Alcoholic | Regular      | Middle Class |
| Not Following | Regular Exercise | Non Alcoholic | Regular      | Middle Class |
| Following     | Regular Exercise | Non Alcoholic | Occasionally | Middle Class |
| Not Following | No Exercise      | Non Alcoholic | Regular      | Middle Class |
| Not Following | No Exercise      | Alcoholic     | Regular      | High Class   |
| Not Following | Regular Exercise | Non Alcoholic | Occasionally | High Class   |
| Not Following | Regular Exercise | Non Alcoholic | Regular      | High Class   |
| Following     | Regular Exercise | Non Alcoholic | Occasionally | High Class   |
| Not Following | No Exercise      | Non Alcoholic | Regular      | High Class   |
| Following     | Occasionally     | Non Alcoholic | Regular      | High Class   |
| Not Following | No Exercise      | Non Alcoholic | Occasionally | High Class   |
| Not Following | No Exercise      | Non Alcoholic | Regular      | High Class   |
| Following     | No Exercise      | Non Alcoholic | Non Smoker   | Poor         |
| Occasionally  | Regular Exercise | Non Alcoholic | Regular      | Poor         |
| Occasionally  | Occasionally     | Non Alcoholic | Occasionally | Poor         |
| Not Following | Regular Exercise | Non Alcoholic | Regular      | Middle Class |
| Not Following | Regular Exercise | Occasionally  | Non Smoker   | Poor         |

|               |                  |               |              |              |
|---------------|------------------|---------------|--------------|--------------|
| Not Following | No Exercise      | Non Alcoholic | Regular      | Poor         |
| Occasionally  | Regular Exercise | Non Alcoholic | Regular      | High Class   |
| Not Following | Regular Exercise | Non Alcoholic | Occasionally | Poor         |
| Not Following | No Exercise      | Non Alcoholic | Regular      | Poor         |
| Occasionally  | Regular Exercise | Non Alcoholic | Regular      | Middle Class |
| Following     | No Exercise      | Non Alcoholic | Occasionally | Poor         |
| Following     | Regular Exercise | Non Alcoholic | Regular      | Poor         |
| Occasionally  | No Exercise      | Non Alcoholic | Occasionally | High Class   |
| Not Following | Regular Exercise | Non Alcoholic | Regular      | Poor         |
| Occasionally  | Occasionally     | Non Alcoholic | Regular      | Poor         |
| Occasionally  | Regular Exercise | Non Alcoholic | Occasionally | Middle Class |
| Occasionally  | Regular Exercise | Non Alcoholic | Regular      | Poor         |
| Occasionally  | Regular Exercise | Non Alcoholic | Regular      | Poor         |
| Following     | Regular Exercise | Non Alcoholic | Regular      | Middle Class |
| Occasionally  | Regular Exercise | Non Alcoholic | Occasionally | Poor         |
| Occasionally  | No Exercise      | Non Alcoholic | Regular      | Poor         |
| Following     | Occasionally     | Non Alcoholic | Regular      | Middle Class |
| Occasionally  | No Exercise      | Alcoholic     | Regular      | Middle Class |
| Not Following | No Exercise      | Non Alcoholic | Regular      | Middle Class |
| Not Following | Regular Exercise | Non Alcoholic | Occasionally | Middle Class |
| Not Following | Regular Exercise | Non Alcoholic | Non Smoker   | Poor         |
| Following     | No Exercise      | Non Alcoholic | Regular      | Poor         |
| Following     | Regular Exercise | Alcoholic     | Occasionally | Poor         |
| Following     | No Exercise      | Non Alcoholic | Regular      | High Class   |
| Following     | No Exercise      | Non Alcoholic | Occasionally | High Class   |
| Not Following | No Exercise      | Non Alcoholic | Regular      | High Class   |
| Following     | Occasionally     | Non Alcoholic | Regular      | High Class   |
| Occasionally  | Regular Exercise | Non Alcoholic | Occasionally | High Class   |
| Occasionally  | Regular Exercise | Non Alcoholic | Regular      | Poor         |
| Occasionally  | No Exercise      | Non Alcoholic | Regular      | Poor         |
| Following     | Regular Exercise | Alcoholic     | Regular      | High Class   |
| Not Following | No Exercise      | Non Alcoholic | Occasionally | High Class   |
| Not Following | Regular Exercise | Non Alcoholic | Regular      | High Class   |
| Following     | No Exercise      | Non Alcoholic | Regular      | High Class   |
| Following     | Regular Exercise | Non Alcoholic | Regular      | Middle Class |
| Following     | No Exercise      | Non Alcoholic | Regular      | Middle Class |
| Not Following | Occasionally     | Non Alcoholic | Occasionally | Middle Class |
| Following     | No Exercise      | Non Alcoholic | Regular      | Middle Class |
| Following     | No Exercise      | Non Alcoholic | Regular      | High Class   |
| Not Following | Occasionally     | Non Alcoholic | Occasionally | Middle Class |
| Not Following | No Exercise      | Non Alcoholic | Regular      | Middle Class |
| Not Following | Occasionally     | Occasionally  | Occasionally | High Class   |
| Following     | Regular Exercise | Non Alcoholic | Regular      | Middle Class |
| Following     | No Exercise      | Non Alcoholic | Regular      | Middle Class |
| Following     | No Exercise      | Non Alcoholic | Occasionally | Poor         |
| Not Following | Occasionally     | Non Alcoholic | Non Smoker   | Poor         |
| Following     | No Exercise      | Non Alcoholic | Regular      | High Class   |

|               |                  |               |              |              |
|---------------|------------------|---------------|--------------|--------------|
| Not Following | No Exercise      | Occasionally  | Regular      | High Class   |
| Not Following | Occasionally     | Non Alcoholic | Occasionally | High Class   |
| Not Following | Regular Exercise | Non Alcoholic | Regular      | High Class   |
| Following     | Regular Exercise | Non Alcoholic | Regular      | Poor         |
| Not Following | Regular Exercise | Non Alcoholic | Regular      | Poor         |
| Following     | No Exercise      | Non Alcoholic | Regular      | Poor         |
| Following     | No Exercise      | Non Alcoholic | Occasionally | High Class   |
| Following     | Regular Exercise | Non Alcoholic | Regular      | High Class   |
| Not Following | Regular Exercise | Non Alcoholic | Regular      | High Class   |
| Following     | Regular Exercise | Non Alcoholic | Occasionally | High Class   |
| Not Following | Regular Exercise | Non Alcoholic | Regular      | High Class   |
| Not Following | Occasionally     | Non Alcoholic | Occasionally | Poor         |
| Following     | Regular Exercise | Alcoholic     | Regular      | High Class   |
| Following     | Regular Exercise | Non Alcoholic | Regular      | Middle Class |
| Following     | Regular Exercise | Non Alcoholic | Occasionally | Middle Class |
| Following     | Regular Exercise | Non Alcoholic | Regular      | Poor         |
| Following     | No Exercise      | Non Alcoholic | Regular      | Middle Class |
| Following     | Regular Exercise | Non Alcoholic | Regular      | Poor         |
| Not Following | Regular Exercise | Non Alcoholic | Occasionally | Poor         |
| Following     | Occasionally     | Non Alcoholic | Regular      | High Class   |
| Following     | No Exercise      | Non Alcoholic | Regular      | Poor         |
| Following     | Regular Exercise | Non Alcoholic | Regular      | High Class   |
| Following     | Regular Exercise | Non Alcoholic | Regular      | Middle Class |
| Following     | No Exercise      | Non Alcoholic | Non Smoker   | Poor         |
| Following     | Regular Exercise | Non Alcoholic | Regular      | Poor         |
| Following     | No Exercise      | Non Alcoholic | Regular      | High Class   |
| Not Following | Regular Exercise | Non Alcoholic | Occasionally | High Class   |
| Not Following | No Exercise      | Non Alcoholic | Non Smoker   | Middle Class |
| Not Following | No Exercise      | Occasionally  | Occasionally | High Class   |
| Not Following | Regular Exercise | Non Alcoholic | Regular      | High Class   |
| Following     | Regular Exercise | Non Alcoholic | Regular      | High Class   |
| Following     | No Exercise      | Non Alcoholic | Occasionally | Poor         |
| Occasionally  | Occasionally     | Non Alcoholic | Regular      | Middle Class |
| Following     | No Exercise      | Non Alcoholic | Regular      | Poor         |
| Following     | Regular Exercise | Non Alcoholic | Regular      | Middle Class |
| Not Following | No Exercise      | Non Alcoholic | Occasionally | Poor         |
| Following     | Regular Exercise | Non Alcoholic | Regular      | Poor         |
| Following     | Occasionally     | Non Alcoholic | Regular      | Poor         |
| Following     | Regular Exercise | Occasionally  | Regular      | Middle Class |
| Not Following | Regular Exercise | Non Alcoholic | Regular      | Middle Class |
| Not Following | No Exercise      | Non Alcoholic | Occasionally | Middle Class |
| Following     | No Exercise      | Non Alcoholic | Regular      | Middle Class |
| Not Following | Regular Exercise | Non Alcoholic | Regular      | High Class   |
| Following     | No Exercise      | Non Alcoholic | Occasionally | High Class   |
| Not Following | Regular Exercise | Non Alcoholic | Regular      | High Class   |
| Following     | Regular Exercise | Non Alcoholic | Occasionally | High Class   |
| Not Following | Regular Exercise | Alcoholic     | Regular      | High Class   |



|               |                  |               |              |              |
|---------------|------------------|---------------|--------------|--------------|
| Following     | Regular Exercise | Non Alcoholic | Regular      | High Class   |
| Not Following | Regular Exercise | Non Alcoholic | Non Smoker   | High Class   |
| Following     | Regular Exercise | Non Alcoholic | Regular      | Middle Class |
| Occasionally  | Regular Exercise | Non Alcoholic | Regular      | Middle Class |
| Not Following | Regular Exercise | Non Alcoholic | Regular      | Middle Class |
| Occasionally  | Regular Exercise | Non Alcoholic | Occasionally | High Class   |
| Not Following | Regular Exercise | Non Alcoholic | Regular      | High Class   |
| Not Following | Regular Exercise | Non Alcoholic | Regular      | High Class   |
| Occasionally  | Regular Exercise | Non Alcoholic | Regular      | High Class   |
| Not Following | Regular Exercise | Non Alcoholic | Regular      | High Class   |
| Occasionally  | Regular Exercise | Non Alcoholic | Occasionally | High Class   |
| Not Following | Regular Exercise | Non Alcoholic | Regular      | High Class   |
| Not Following | Regular Exercise | Alcoholic     | Regular      | Middle Class |
| Occasionally  | Regular Exercise | Non Alcoholic | Occasionally | Middle Class |
| Not Following | Regular Exercise | Non Alcoholic | Regular      | Middle Class |
| Occasionally  | Regular Exercise | Non Alcoholic | Occasionally | High Class   |
| Not Following | Regular Exercise | Non Alcoholic | Regular      | High Class   |
| Occasionally  | No Exercise      | Non Alcoholic | Regular      | Middle Class |
| Occasionally  | Occasionally     | Non Alcoholic | Occasionally | High Class   |
| Not Following | No Exercise      | Alcoholic     | Regular      | Middle Class |
| Not Following | No Exercise      | Non Alcoholic | Regular      | High Class   |
| Occasionally  | Regular Exercise | Non Alcoholic | Regular      | Poor         |
| Occasionally  | Regular Exercise | Non Alcoholic | Occasionally | Poor         |
| Not Following | Regular Exercise | Non Alcoholic | Regular      | Poor         |
| Not Following | Regular Exercise | Alcoholic     | Regular      | Poor         |
| Not Following | Regular Exercise | Non Alcoholic | Regular      | Poor         |
| Not Following | No Exercise      | Non Alcoholic | Non Smoker   | Poor         |
| Not Following | Regular Exercise | Non Alcoholic | Occasionally | Middle Class |
| Not Following | No Exercise      | Non Alcoholic | Regular      | Middle Class |
| Following     | Regular Exercise | Non Alcoholic | Regular      | Middle Class |
| Following     | Occasionally     | Non Alcoholic | Occasionally | Middle Class |
| Following     | Regular Exercise | Non Alcoholic | Regular      | High Class   |
| Not Following | Regular Exercise | Non Alcoholic | Occasionally | Poor         |
| Not Following | No Exercise      | Alcoholic     | Regular      | Poor         |
| Following     | No Exercise      | Non Alcoholic | Regular      | High Class   |
| Following     | No Exercise      | Non Alcoholic | Occasionally | Middle Class |
| Not Following | No Exercise      | Alcoholic     | Regular      | Middle Class |
| Occasionally  | Regular Exercise | Alcoholic     | Regular      | Middle Class |
| Following     | Regular Exercise | Non Alcoholic | Regular      | High Class   |
| Occasionally  | Regular Exercise | Non Alcoholic | Occasionally | High Class   |
| Following     | No Exercise      | Non Alcoholic | Regular      | High Class   |
| Following     | Regular Exercise | Non Alcoholic | Regular      | Poor         |
| Following     | Regular Exercise | Non Alcoholic | Regular      | Poor         |
| Occasionally  | Regular Exercise | Non Alcoholic | Regular      | High Class   |
| Following     | No Exercise      | Non Alcoholic | Occasionally | Middle Class |
| Not Following | Regular Exercise | Non Alcoholic | Regular      | High Class   |
| Following     | Regular Exercise | Non Alcoholic | Regular      | Poor         |

|               |                  |               |              |              |
|---------------|------------------|---------------|--------------|--------------|
| Not Following | Regular Exercise | Non Alcoholic | Occasionally | High Class   |
| Not Following | No Exercise      | Non Alcoholic | Regular      | High Class   |
| Following     | Regular Exercise | Non Alcoholic | Regular      | High Class   |
| Following     | No Exercise      | Non Alcoholic | Regular      | High Class   |
| Not Following | No Exercise      | Non Alcoholic | Occasionally | High Class   |
| Not Following | No Exercise      | Non Alcoholic | Regular      | High Class   |
| Not Following | No Exercise      | Non Alcoholic | Regular      | High Class   |
| Following     | Regular Exercise | Non Alcoholic | Non Smoker   | Poor         |
| Not Following | Regular Exercise | Non Alcoholic | Regular      | Poor         |
| Following     | Regular Exercise | Non Alcoholic | Occasionally | Poor         |
| Following     | No Exercise      | Non Alcoholic | Regular      | Poor         |
| Not Following | No Exercise      | Non Alcoholic | Regular      | High Class   |
| Following     | Regular Exercise | Non Alcoholic | Occasionally | Poor         |
| Not Following | No Exercise      | Alcoholic     | Regular      | High Class   |
| Not Following | Regular Exercise | Non Alcoholic | Occasionally | High Class   |
| Following     | Regular Exercise | Non Alcoholic | Regular      | Poor         |
| Following     | Occasionally     | Non Alcoholic | Regular      | Poor         |
| Following     | Regular Exercise | Non Alcoholic | Occasionally | Poor         |
| Following     | Occasionally     | Non Alcoholic | Regular      | Middle Class |
| Occasionally  | No Exercise      | Non Alcoholic | Regular      | Poor         |
| Following     | No Exercise      | Non Alcoholic | Regular      | High Class   |
| Following     | No Exercise      | Non Alcoholic | Occasionally | High Class   |
| Occasionally  | No Exercise      | Occasionally  | Regular      | High Class   |
| Following     | Regular Exercise | Non Alcoholic | Regular      | Middle Class |
| Occasionally  | No Exercise      | Non Alcoholic | Regular      | Middle Class |
| Following     | No Exercise      | Non Alcoholic | Regular      | Poor         |
| Following     | No Exercise      | Non Alcoholic | Occasionally | Poor         |
| Not Following | Regular Exercise | Occasionally  | Regular      | Middle Class |
| Not Following | Regular Exercise | Occasionally  | Regular      | Middle Class |
| Following     | Regular Exercise | Non Alcoholic | Occasionally | Poor         |
| Not Following | Regular Exercise | Non Alcoholic | Regular      | High Class   |
| Not Following | Regular Exercise | Non Alcoholic | Occasionally | High Class   |
| Following     | Regular Exercise | Non Alcoholic | Non Smoker   | Poor         |
| Not Following | Regular Exercise | Non Alcoholic | Regular      | High Class   |
| Not Following | Regular Exercise | Non Alcoholic | Occasionally | High Class   |
| Not Following | Occasionally     | Non Alcoholic | Regular      | High Class   |
| Not Following | No Exercise      | Non Alcoholic | Regular      | Middle Class |
| Following     | Occasionally     | Alcoholic     | Regular      | Poor         |
| Occasionally  | No Exercise      | Non Alcoholic | Occasionally | Middle Class |
| Occasionally  | No Exercise      | Non Alcoholic | Regular      | High Class   |
| Occasionally  | Occasionally     | Non Alcoholic | Regular      | High Class   |
| Not Following | Regular Exercise | Non Alcoholic | Regular      | Middle Class |
| Not Following | Regular Exercise | Non Alcoholic | Regular      | High Class   |
| Not Following | No Exercise      | Non Alcoholic | Occasionally | High Class   |
| Occasionally  | Regular Exercise | Non Alcoholic | Regular      | High Class   |
| Not Following | Regular Exercise | Non Alcoholic | Regular      | Middle Class |
| Not Following | Regular Exercise | Non Alcoholic | Occasionally | High Class   |

|               |                  |               |              |              |
|---------------|------------------|---------------|--------------|--------------|
| Occasionally  | Regular Exercise | Non Alcoholic | Regular      | High Class   |
| Not Following | Regular Exercise | Non Alcoholic | Occasionally | Middle Class |
| Occasionally  | Regular Exercise | Non Alcoholic | Regular      | High Class   |
| Not Following | No Exercise      | Non Alcoholic | Regular      | High Class   |
| Following     | No Exercise      | Occasionally  | Occasionally | Poor         |
| Following     | Regular Exercise | Non Alcoholic | Regular      | Middle Class |
| Following     | No Exercise      | Non Alcoholic | Regular      | Middle Class |
| Following     | Regular Exercise | Non Alcoholic | Non Smoker   | Poor         |
| Not Following | No Exercise      | Non Alcoholic | Occasionally | Poor         |
| Following     | No Exercise      | Non Alcoholic | Regular      | Middle Class |
| Following     | No Exercise      | Non Alcoholic | Regular      | Poor         |
| Not Following | No Exercise      | Non Alcoholic | Regular      | Middle Class |
| Not Following | Regular Exercise | Non Alcoholic | Regular      | High Class   |
| Not Following | Regular Exercise | Non Alcoholic | Occasionally | High Class   |
| Following     | No Exercise      | Non Alcoholic | Regular      | High Class   |
| Not Following | Regular Exercise | Non Alcoholic | Regular      | High Class   |
| Occasionally  | No Exercise      | Non Alcoholic | Occasionally | High Class   |
| Not Following | Occasionally     | Alcoholic     | Regular      | High Class   |
| Not Following | No Exercise      | Non Alcoholic | Regular      | Middle Class |
| Following     | Regular Exercise | Non Alcoholic | Occasionally | Middle Class |
| Not Following | No Exercise      | Non Alcoholic | Regular      | Poor         |
| Following     | Regular Exercise | Non Alcoholic | Regular      | Middle Class |
| Following     | Regular Exercise | Non Alcoholic | Occasionally | Poor         |
| Not Following | No Exercise      | Non Alcoholic | Regular      | Middle Class |
| Not Following | Regular Exercise | Non Alcoholic | Occasionally | Poor         |
| Not Following | No Exercise      | Non Alcoholic | Regular      | Middle Class |
| Not Following | Regular Exercise | Non Alcoholic | Regular      | Poor         |
| Not Following | No Exercise      | Non Alcoholic | Occasionally | High Class   |
| Following     | Regular Exercise | Non Alcoholic | Regular      | Poor         |
| Not Following | No Exercise      | Non Alcoholic | Non Smoker   | High Class   |
| Following     | Regular Exercise | Non Alcoholic | Regular      | Poor         |
| Following     | Occasionally     | Non Alcoholic | Occasionally | High Class   |
| Not Following | No Exercise      | Alcoholic     | Regular      | Poor         |
| Not Following | Regular Exercise | Non Alcoholic | Regular      | High Class   |
| Following     | Regular Exercise | Non Alcoholic | Regular      | Poor         |
| Not Following | No Exercise      | Non Alcoholic | Regular      | Middle Class |
| Not Following | Regular Exercise | Non Alcoholic | Occasionally | High Class   |
| Not Following | No Exercise      | Alcoholic     | Regular      | Middle Class |
| Following     | Regular Exercise | Non Alcoholic | Regular      | High Class   |
| Following     | Regular Exercise | Non Alcoholic | Occasionally | Middle Class |
| Not Following | No Exercise      | Non Alcoholic | Regular      | High Class   |
| Following     | No Exercise      | Non Alcoholic | Occasionally | Middle Class |
| Following     | Regular Exercise | Non Alcoholic | Regular      | High Class   |
| Following     | Occasionally     | Non Alcoholic | Regular      | Poor         |
| Following     | Regular Exercise | Non Alcoholic | Occasionally | High Class   |
| Not Following | Occasionally     | Non Alcoholic | Regular      | Poor         |
| Following     | Regular Exercise | Alcoholic     | Regular      | High Class   |

|               |                  |               |              |              |
|---------------|------------------|---------------|--------------|--------------|
| Not Following | Regular Exercise | Non Alcoholic | Regular      | Poor         |
| Not Following | No Exercise      | Non Alcoholic | Occasionally | Middle Class |
| Not Following | Regular Exercise | Non Alcoholic | Regular      | Poor         |
| Following     | No Exercise      | Non Alcoholic | Regular      | Poor         |
| Following     | Regular Exercise | Non Alcoholic | Regular      | Poor         |
| Following     | No Exercise      | Non Alcoholic | Regular      | Poor         |
| Not Following | Regular Exercise | Non Alcoholic | Occasionally | High Class   |
| Not Following | No Exercise      | Non Alcoholic | Non Smoker   | Poor         |
| Not Following | Regular Exercise | Non Alcoholic | Regular      | High Class   |
| Following     | Regular Exercise | Non Alcoholic | Occasionally | Poor         |
| Following     | Occasionally     | Non Alcoholic | Regular      | Middle Class |
| Following     | Regular Exercise | Non Alcoholic | Occasionally | Poor         |
| Following     | Regular Exercise | Non Alcoholic | Regular      | Poor         |
| Not Following | No Exercise      | Non Alcoholic | Regular      | High Class   |
| Following     | Regular Exercise | Non Alcoholic | Non Smoker   | Poor         |
| Following     | No Exercise      | Non Alcoholic | Regular      | Poor         |
| Following     | Regular Exercise | Non Alcoholic | Regular      | Poor         |
| Following     | No Exercise      | Non Alcoholic | Regular      | Poor         |
| Occasionally  | Regular Exercise | Alcoholic     | Occasionally | High Class   |
| Occasionally  | No Exercise      | Non Alcoholic | Regular      | Middle Class |
| Occasionally  | Regular Exercise | Non Alcoholic | Regular      | High Class   |
| Following     | Occasionally     | Non Alcoholic | Regular      | Poor         |
| Following     | Occasionally     | Non Alcoholic | Regular      | Poor         |
| Following     | No Exercise      | Non Alcoholic | Occasionally | Poor         |
| Following     | Regular Exercise | Non Alcoholic | Regular      | Poor         |
| Following     | No Exercise      | Non Alcoholic | Regular      | Poor         |
| Occasionally  | Regular Exercise | Non Alcoholic | Occasionally | High Class   |
| Not Following | No Exercise      | Non Alcoholic | Regular      | High Class   |
| Occasionally  | Regular Exercise | Non Alcoholic | Occasionally | High Class   |
| Not Following | Regular Exercise | Non Alcoholic | Regular      | High Class   |
| Not Following | No Exercise      | Non Alcoholic | Regular      | High Class   |
| Occasionally  | No Exercise      | Occasionally  | Occasionally | Poor         |
| Not Following | Regular Exercise | Non Alcoholic | Non Smoker   | Poor         |
| Occasionally  | No Exercise      | Non Alcoholic | Regular      | Poor         |
| Occasionally  | Occasionally     | Non Alcoholic | Regular      | Poor         |
| Occasionally  | No Exercise      | Non Alcoholic | Occasionally | Poor         |
| Not Following | Regular Exercise | Non Alcoholic | Regular      | Middle Class |
| Not Following | No Exercise      | Non Alcoholic | Regular      | High Class   |
| Occasionally  | Regular Exercise | Non Alcoholic | Regular      | High Class   |
| Not Following | No Exercise      | Non Alcoholic | Regular      | High Class   |
| Not Following | Regular Exercise | Non Alcoholic | Occasionally | High Class   |
| Not Following | No Exercise      | Non Alcoholic | Regular      | High Class   |
| Not Following | No Exercise      | Occasionally  | Regular      | Middle Class |
| Following     | Regular Exercise | Non Alcoholic | Occasionally | Middle Class |
| Following     | No Exercise      | Non Alcoholic | Regular      | Middle Class |
| Following     | Occasionally     | Non Alcoholic | Occasionally | Poor         |
| Not Following | Regular Exercise | Non Alcoholic | Regular      | Poor         |

|               |                  |               |              |              |
|---------------|------------------|---------------|--------------|--------------|
| Not Following | Regular Exercise | Non Alcoholic | Regular      | Poor         |
| Not Following | No Exercise      | Non Alcoholic | Occasionally | Middle Class |
| Occasionally  | No Exercise      | Non Alcoholic | Regular      | Poor         |
| Not Following | No Exercise      | Non Alcoholic | Regular      | Middle Class |
| Occasionally  | No Exercise      | Non Alcoholic | Regular      | Middle Class |
| Occasionally  | Regular Exercise | Non Alcoholic | Occasionally | Poor         |
| Occasionally  | Occasionally     | Non Alcoholic | Regular      | Poor         |
| Not Following | Regular Exercise | Non Alcoholic | Regular      | Poor         |
| Following     | Regular Exercise | Non Alcoholic | Regular      | Middle Class |
| Not Following | No Exercise      | Non Alcoholic | Regular      | Middle Class |
| Not Following | No Exercise      | Alcoholic     | Non Smoker   | Middle Class |
| Following     | No Exercise      | Non Alcoholic | Regular      | Poor         |
| Not Following | Regular Exercise | Non Alcoholic | Regular      | High Class   |
| Not Following | No Exercise      | Non Alcoholic | Occasionally | High Class   |
| Not Following | Regular Exercise | Non Alcoholic | Regular      | High Class   |
| Following     | No Exercise      | Non Alcoholic | Occasionally | Poor         |
| Following     | Regular Exercise | Non Alcoholic | Regular      | Middle Class |
| Following     | No Exercise      | Non Alcoholic | Regular      | Poor         |
| Following     | Regular Exercise | Non Alcoholic | Occasionally | Middle Class |
| Following     | No Exercise      | Non Alcoholic | Regular      | Poor         |
| Occasionally  | No Exercise      | Non Alcoholic | Regular      | High Class   |
| Occasionally  | Regular Exercise | Non Alcoholic | Regular      | High Class   |
| Following     | Regular Exercise | Non Alcoholic | Regular      | Poor         |
| Occasionally  | Regular Exercise | Non Alcoholic | Regular      | High Class   |
| Following     | Regular Exercise | Non Alcoholic | Regular      | Middle Class |
| Occasionally  | Regular Exercise | Occasionally  | Regular      | Poor         |
| Following     | No Exercise      | Non Alcoholic | Regular      | High Class   |
| Not Following | Regular Exercise | Occasionally  | Occasionally | High Class   |
| Following     | Regular Exercise | Non Alcoholic | Regular      | High Class   |
| Not Following | Regular Exercise | Non Alcoholic | Regular      | High Class   |
| Not Following | No Exercise      | Non Alcoholic | Occasionally | High Class   |
| Not Following | Regular Exercise | Non Alcoholic | Regular      | High Class   |
| Following     | Regular Exercise | Alcoholic     | Occasionally | High Class   |
| Not Following | Regular Exercise | Non Alcoholic | Regular      | Middle Class |
| Not Following | Regular Exercise | Non Alcoholic | Regular      | High Class   |
| Following     | No Exercise      | Non Alcoholic | Non Smoker   | High Class   |
| Following     | No Exercise      | Non Alcoholic | Regular      | Poor         |
| Not Following | No Exercise      | Non Alcoholic | Regular      | High Class   |
| Following     | Regular Exercise | Non Alcoholic | Regular      | High Class   |
| Following     | No Exercise      | Non Alcoholic | Occasionally | Middle Class |
| Not Following | Regular Exercise | Non Alcoholic | Regular      | High Class   |
| Not Following | Occasionally     | Non Alcoholic | Regular      | Middle Class |
| Occasionally  | Regular Exercise | Occasionally  | Regular      | High Class   |
| Following     | No Exercise      | Non Alcoholic | Regular      | High Class   |
| Following     | No Exercise      | Non Alcoholic | Regular      | Poor         |
| Not Following | Regular Exercise | Non Alcoholic | Regular      | High Class   |
| Not Following | No Exercise      | Non Alcoholic | Regular      | High Class   |

|               |                  |               |              |              |
|---------------|------------------|---------------|--------------|--------------|
| Following     | No Exercise      | Non Alcoholic | Regular      | Poor         |
| Not Following | Regular Exercise | Non Alcoholic | Occasionally | High Class   |
| Not Following | Regular Exercise | Non Alcoholic | Regular      | High Class   |
| Following     | No Exercise      | Non Alcoholic | Regular      | Poor         |
| Not Following | No Exercise      | Non Alcoholic | Occasionally | Middle Class |
| Following     | No Exercise      | Non Alcoholic | Regular      | Poor         |
| Not Following | No Exercise      | Non Alcoholic | Occasionally | High Class   |
| Following     | Regular Exercise | Non Alcoholic | Regular      | Middle Class |
| Occasionally  | No Exercise      | Non Alcoholic | Regular      | High Class   |
| Following     | Regular Exercise | Non Alcoholic | Occasionally | Poor         |
| Occasionally  | Regular Exercise | Non Alcoholic | Regular      | Poor         |
| Following     | No Exercise      | Non Alcoholic | Regular      | Poor         |
| Not Following | No Exercise      | Non Alcoholic | Regular      | Poor         |
| Following     | No Exercise      | Non Alcoholic | Occasionally | Poor         |
| Following     | Regular Exercise | Non Alcoholic | Regular      | High Class   |
| Following     | No Exercise      | Non Alcoholic | Regular      | High Class   |
| Not Following | Regular Exercise | Non Alcoholic | Regular      | High Class   |
| Not Following | No Exercise      | Non Alcoholic | Regular      | High Class   |
| Not Following | Regular Exercise | Non Alcoholic | Regular      | High Class   |
| Not Following | No Exercise      | Non Alcoholic | Regular      | Poor         |
| Following     | Regular Exercise | Non Alcoholic | Regular      | Poor         |
| Not Following | No Exercise      | Non Alcoholic | Regular      | Poor         |
| Following     | No Exercise      | Non Alcoholic | Occasionally | Poor         |
| Not Following | Regular Exercise | Non Alcoholic | Regular      | Poor         |
| Not Following | Regular Exercise | Non Alcoholic | Regular      | Middle Class |
| Following     | Regular Exercise | Non Alcoholic | Occasionally | High Class   |
| Not Following | Regular Exercise | Non Alcoholic | Regular      | High Class   |
| Not Following | Regular Exercise | Occasionally  | Occasionally | High Class   |
| Following     | No Exercise      | Non Alcoholic | Regular      | High Class   |
| Following     | Regular Exercise | Non Alcoholic | Regular      | High Class   |
| Following     | Regular Exercise | Non Alcoholic | Occasionally | Middle Class |
| Following     | Regular Exercise | Non Alcoholic | Regular      | Middle Class |
| Following     | No Exercise      | Non Alcoholic | Regular      | Middle Class |
| Following     | Regular Exercise | Non Alcoholic | Regular      | Poor         |
| Not Following | Regular Exercise | Non Alcoholic | Occasionally | Poor         |
| Not Following | Regular Exercise | Non Alcoholic | Regular      | Poor         |
| Not Following | Regular Exercise | Non Alcoholic | Regular      | Middle Class |
| Following     | No Exercise      | Non Alcoholic | Regular      | Poor         |
| Not Following | No Exercise      | Non Alcoholic | Regular      | Middle Class |
| Not Following | No Exercise      | Non Alcoholic | Regular      | Middle Class |
| Following     | Regular Exercise | Non Alcoholic | Regular      | Poor         |
| Not Following | No Exercise      | Occasionally  | Regular      | Poor         |
| Not Following | Regular Exercise | Non Alcoholic | Regular      | Poor         |
| Following     | No Exercise      | Occasionally  | Occasionally | Middle Class |
| Not Following | Regular Exercise | Occasionally  | Regular      | Middle Class |
| Not Following | No Exercise      | Non Alcoholic | Non Smoker   | Middle Class |
| Following     | Regular Exercise | Non Alcoholic | Occasionally | Poor         |

|               |                  |               |              |              |
|---------------|------------------|---------------|--------------|--------------|
| Following     | No Exercise      | Non Alcoholic | Regular      | High Class   |
| Following     | Regular Exercise | Non Alcoholic | Occasionally | High Class   |
| Not Following | No Exercise      | Non Alcoholic | Regular      | High Class   |
| Not Following | Regular Exercise | Non Alcoholic | Regular      | Poor         |
| Not Following | Regular Exercise | Non Alcoholic | Occasionally | Middle Class |
| Following     | Occasionally     | Alcoholic     | Regular      | Poor         |
| Not Following | No Exercise      | Non Alcoholic | Regular      | Middle Class |
| Following     | Regular Exercise | Non Alcoholic | Regular      | Poor         |
| Following     | No Exercise      | Non Alcoholic | Occasionally | High Class   |
| Following     | Regular Exercise | Non Alcoholic | Regular      | High Class   |
| Not Following | No Exercise      | Non Alcoholic | Regular      | Poor         |
| Not Following | Regular Exercise | Non Alcoholic | Regular      | High Class   |
| Not Following | No Exercise      | Non Alcoholic | Regular      | Middle Class |
| Following     | Regular Exercise | Non Alcoholic | Regular      | Poor         |
| Not Following | No Exercise      | Non Alcoholic | Regular      | High Class   |
| Following     | Regular Exercise | Alcoholic     | Regular      | High Class   |
| Following     | No Exercise      | Non Alcoholic | Regular      | High Class   |
| Following     | Regular Exercise | Non Alcoholic | Occasionally | Poor         |
| Following     | Regular Exercise | Non Alcoholic | Regular      | Middle Class |
| Occasionally  | Regular Exercise | Non Alcoholic | Regular      | High Class   |
| Not Following | No Exercise      | Alcoholic     | Occasionally | High Class   |
| Not Following | No Exercise      | Alcoholic     | Regular      | High Class   |
| Occasionally  | Regular Exercise | Non Alcoholic | Occasionally | High Class   |
| Not Following | Regular Exercise | Non Alcoholic | Regular      | Middle Class |
| Occasionally  | Regular Exercise | Non Alcoholic | Regular      | Middle Class |
| Occasionally  | Regular Exercise | Non Alcoholic | Occasionally | Middle Class |
| Occasionally  | Regular Exercise | Non Alcoholic | Regular      | Middle Class |
| Occasionally  | No Exercise      | Non Alcoholic | Regular      | Middle Class |
| Occasionally  | Regular Exercise | Non Alcoholic | Regular      | Middle Class |
| Occasionally  | Regular Exercise | Non Alcoholic | Occasionally | Poor         |
| Not Following | Regular Exercise | Alcoholic     | Regular      | Poor         |
| Occasionally  | Regular Exercise | Non Alcoholic | Regular      | Poor         |
| Occasionally  | Regular Exercise | Non Alcoholic | Regular      | Poor         |
| Occasionally  | Regular Exercise | Non Alcoholic | Regular      | Poor         |
| Following     | Regular Exercise | Non Alcoholic | Regular      | Poor         |
| Following     | Regular Exercise | Non Alcoholic | Regular      | High Class   |
| Not Following | No Exercise      | Non Alcoholic | Regular      | Poor         |
| Not Following | No Exercise      | Non Alcoholic | Regular      | Poor         |
| Following     | No Exercise      | Occasionally  | Occasionally | Poor         |
| Following     | Regular Exercise | Non Alcoholic | Regular      | Poor         |
| Following     | No Exercise      | Non Alcoholic | Regular      | Poor         |
| Following     | Regular Exercise | Non Alcoholic | Occasionally | Poor         |
| Following     | No Exercise      | Non Alcoholic | Regular      | Poor         |
| Following     | Regular Exercise | Non Alcoholic | Occasionally | Poor         |
| Following     | Occasionally     | Non Alcoholic | Regular      | Poor         |
| Not Following | No Exercise      | Occasionally  | Regular      | High Class   |
| Following     | Regular Exercise | Non Alcoholic | Occasionally | High Class   |

|               |                  |               |              |              |
|---------------|------------------|---------------|--------------|--------------|
| Following     | No Exercise      | Non Alcoholic | Regular      | High Class   |
| Not Following | No Exercise      | Non Alcoholic | Regular      | High Class   |
| Not Following | Regular Exercise | Non Alcoholic | Regular      | Middle Class |
| Following     | Regular Exercise | Non Alcoholic | Occasionally | High Class   |
| Not Following | No Exercise      | Non Alcoholic | Regular      | Middle Class |
| Not Following | No Exercise      | Non Alcoholic | Regular      | Middle Class |
| Following     | Occasionally     | Occasionally  | Regular      | High Class   |
| Not Following | Regular Exercise | Alcoholic     | Non Smoker   | Middle Class |
| Following     | Regular Exercise | Non Alcoholic | Regular      | High Class   |
| Following     | Regular Exercise | Non Alcoholic | Regular      | Middle Class |
| Not Following | No Exercise      | Non Alcoholic | Occasionally | High Class   |
| Not Following | Regular Exercise | Non Alcoholic | Regular      | High Class   |
| Following     | Regular Exercise | Non Alcoholic | Regular      | Middle Class |
| Following     | Regular Exercise | Non Alcoholic | Occasionally | High Class   |
| Not Following | Regular Exercise | Non Alcoholic | Regular      | Middle Class |
| Following     | No Exercise      | Non Alcoholic | Occasionally | High Class   |
| Following     | No Exercise      | Occasionally  | Regular      | Middle Class |
| Not Following | No Exercise      | Non Alcoholic | Regular      | High Class   |
| Following     | Regular Exercise | Non Alcoholic | Occasionally | Middle Class |
| Following     | No Exercise      | Non Alcoholic | Regular      | High Class   |
| Following     | No Exercise      | Non Alcoholic | Regular      | High Class   |
| Not Following | No Exercise      | Non Alcoholic | Regular      | Poor         |
| Not Following | Regular Exercise | Non Alcoholic | Occasionally | Middle Class |
| Not Following | No Exercise      | Occasionally  | Regular      | Middle Class |
| Not Following | Regular Exercise | Non Alcoholic | Regular      | Poor         |
| Not Following | No Exercise      | Non Alcoholic | Regular      | High Class   |
| Not Following | Regular Exercise | Non Alcoholic | Regular      | High Class   |
| Following     | Regular Exercise | Non Alcoholic | Regular      | Poor         |
| Not Following | Regular Exercise | Non Alcoholic | Regular      | High Class   |
| Following     | Regular Exercise | Non Alcoholic | Regular      | Poor         |
| Following     | No Exercise      | Non Alcoholic | Regular      | Poor         |
| Not Following | Regular Exercise | Non Alcoholic | Occasionally | High Class   |
| Not Following | No Exercise      | Non Alcoholic | Regular      | High Class   |
| Following     | No Exercise      | Non Alcoholic | Regular      | Poor         |
| Not Following | Regular Exercise | Occasionally  | Occasionally | High Class   |
| Following     | No Exercise      | Non Alcoholic | Regular      | Poor         |
| Not Following | Regular Exercise | Non Alcoholic | Occasionally | High Class   |
| Occasionally  | No Exercise      | Non Alcoholic | Regular      | High Class   |
| Not Following | No Exercise      | Non Alcoholic | Regular      | High Class   |
| Not Following | No Exercise      | Non Alcoholic | Occasionally | High Class   |
| Occasionally  | No Exercise      | Non Alcoholic | Regular      | Middle Class |
| Not Following | No Exercise      | Non Alcoholic | Regular      | Middle Class |
| Occasionally  | Regular Exercise | Non Alcoholic | Regular      | Middle Class |
| Not Following | Regular Exercise | Non Alcoholic | Occasionally | Middle Class |
| Not Following | No Exercise      | Non Alcoholic | Regular      | Middle Class |
| Not Following | Regular Exercise | Alcoholic     | Regular      | Middle Class |
| Not Following | Regular Exercise | Non Alcoholic | Regular      | Middle Class |



|               |                  |               |              |              |
|---------------|------------------|---------------|--------------|--------------|
| Occasionally  | No Exercise      | Non Alcoholic | Regular      | Poor         |
| Occasionally  | Regular Exercise | Non Alcoholic | Regular      | Middle Class |
| Occasionally  | No Exercise      | Non Alcoholic | Regular      | Poor         |
| Occasionally  | No Exercise      | Non Alcoholic | Regular      | High Class   |
| Occasionally  | No Exercise      | Alcoholic     | Regular      | Poor         |
| Occasionally  | Regular Exercise | Non Alcoholic | Occasionally | High Class   |
| Occasionally  | Regular Exercise | Non Alcoholic | Regular      | Poor         |
| Not Following | No Exercise      | Non Alcoholic | Regular      | High Class   |
| Not Following | Regular Exercise | Alcoholic     | Occasionally | High Class   |
| Not Following | No Exercise      | Non Alcoholic | Regular      | Poor         |
| Occasionally  | Regular Exercise | Non Alcoholic | Occasionally | Poor         |
| Not Following | No Exercise      | Non Alcoholic | Regular      | High Class   |
| Occasionally  | Regular Exercise | Non Alcoholic | Regular      | Poor         |
| Not Following | Regular Exercise | Non Alcoholic | Occasionally | High Class   |
| Not Following | Regular Exercise | Non Alcoholic | Regular      | High Class   |
| Not Following | Regular Exercise | Non Alcoholic | Regular      | Poor         |
| Not Following | No Exercise      | Non Alcoholic | Regular      | Poor         |
| Not Following | Occasionally     | Non Alcoholic | Occasionally | Poor         |
| Occasionally  | No Exercise      | Non Alcoholic | Regular      | Poor         |
| Following     | No Exercise      | Non Alcoholic | Regular      | Poor         |
| Not Following | No Exercise      | Non Alcoholic | Regular      | Poor         |
| Occasionally  | No Exercise      | Alcoholic     | Regular      | Middle Class |
| Not Following | No Exercise      | Non Alcoholic | Regular      | Middle Class |
| Occasionally  | Regular Exercise | Non Alcoholic | Regular      | Middle Class |
| Not Following | No Exercise      | Non Alcoholic | Regular      | Middle Class |
| Not Following | Regular Exercise | Non Alcoholic | Regular      | Poor         |
| Following     | Regular Exercise | Non Alcoholic | Occasionally | Middle Class |
| Following     | No Exercise      | Non Alcoholic | Regular      | Poor         |
| Following     | Regular Exercise | Non Alcoholic | Regular      | Poor         |
| Not Following | No Exercise      | Non Alcoholic | Occasionally | Poor         |
| Following     | Regular Exercise | Non Alcoholic | Regular      | Middle Class |
| Following     | No Exercise      | Non Alcoholic | Occasionally | Middle Class |
| Not Following | Regular Exercise | Non Alcoholic | Regular      | Poor         |
| Not Following | Regular Exercise | Non Alcoholic | Regular      | Poor         |
| Not Following | No Exercise      | Non Alcoholic | Occasionally | Middle Class |
| Not Following | No Exercise      | Non Alcoholic | Regular      | Poor         |
| Following     | Regular Exercise | Occasionally  | Regular      | Poor         |
| Following     | No Exercise      | Non Alcoholic | Regular      | High Class   |
| Not Following | Regular Exercise | Non Alcoholic | Occasionally | Poor         |
| Not Following | No Exercise      | Non Alcoholic | Regular      | High Class   |
| Not Following | Regular Exercise | Non Alcoholic | Regular      | High Class   |
| Not Following | No Exercise      | Non Alcoholic | Regular      | High Class   |
| Following     | Regular Exercise | Non Alcoholic | Regular      | Middle Class |
| Not Following | No Exercise      | Non Alcoholic | Regular      | Poor         |
| Following     | Regular Exercise | Non Alcoholic | Regular      | High Class   |
| Not Following | No Exercise      | Non Alcoholic | Regular      | High Class   |
| Not Following | No Exercise      | Non Alcoholic | Regular      | High Class   |

|               |                  |               |              |              |
|---------------|------------------|---------------|--------------|--------------|
| Following     | Regular Exercise | Occasionally  | Occasionally | Poor         |
| Following     | Regular Exercise | Non Alcoholic | Regular      | Middle Class |
| Not Following | Regular Exercise | Non Alcoholic | Regular      | Poor         |
| Following     | Regular Exercise | Non Alcoholic | Occasionally | Middle Class |
| Not Following | Regular Exercise | Non Alcoholic | Regular      | Poor         |
| Following     | Regular Exercise | Non Alcoholic | Occasionally | Middle Class |
| Following     | No Exercise      | Non Alcoholic | Regular      | Poor         |
| Following     | No Exercise      | Non Alcoholic | Regular      | Middle Class |
| Not Following | Regular Exercise | Non Alcoholic | Occasionally | Poor         |
| Following     | Regular Exercise | Non Alcoholic | Regular      | Middle Class |
| Following     | Regular Exercise | Non Alcoholic | Regular      | Poor         |
| Not Following | Regular Exercise | Non Alcoholic | Regular      | High Class   |
| Not Following | Regular Exercise | Occasionally  | Occasionally | High Class   |
| Following     | Regular Exercise | Non Alcoholic | Non Smoker   | High Class   |
| Not Following | Regular Exercise | Non Alcoholic | Regular      | Middle Class |
| Following     | No Exercise      | Non Alcoholic | Regular      | High Class   |
| Not Following | No Exercise      | Non Alcoholic | Regular      | Middle Class |
| Not Following | Occasionally     | Occasionally  | Regular      | High Class   |
| Following     | No Exercise      | Non Alcoholic | Regular      | Poor         |
| Following     | Occasionally     | Non Alcoholic | Regular      | High Class   |
| Following     | No Exercise      | Non Alcoholic | Regular      | High Class   |
| Following     | Regular Exercise | Non Alcoholic | Occasionally | Poor         |
| Not Following | No Exercise      | Non Alcoholic | Regular      | High Class   |
| Not Following | No Exercise      | Non Alcoholic | Regular      | High Class   |
| Following     | Occasionally     | Non Alcoholic | Occasionally | High Class   |
| Not Following | No Exercise      | Non Alcoholic | Regular      | High Class   |
| Following     | No Exercise      | Occasionally  | Occasionally | Poor         |
| Following     | Occasionally     | Non Alcoholic | Regular      | Poor         |
| Following     | No Exercise      | Non Alcoholic | Regular      | Poor         |
| Occasionally  | No Exercise      | Non Alcoholic | Occasionally | Poor         |
| Following     | Occasionally     | Non Alcoholic | Regular      | High Class   |
| Not Following | No Exercise      | Non Alcoholic | Regular      | High Class   |
| Not Following | No Exercise      | Occasionally  | Regular      | Poor         |
| Following     | Regular Exercise | Non Alcoholic | Occasionally | High Class   |
| Not Following | Regular Exercise | Non Alcoholic | Regular      | Poor         |
| Following     | Regular Exercise | Non Alcoholic | Regular      | High Class   |
| Following     | Regular Exercise | Non Alcoholic | Regular      | Poor         |
| Following     | Regular Exercise | Non Alcoholic | Regular      | Poor         |
| Following     | No Exercise      | Non Alcoholic | Regular      | Poor         |
| Not Following | No Exercise      | Non Alcoholic | Regular      | Middle Class |
| Not Following | No Exercise      | Non Alcoholic | Regular      | High Class   |
| Following     | No Exercise      | Occasionally  | Regular      | Poor         |
| Not Following | Regular Exercise | Non Alcoholic | Occasionally | High Class   |
| Not Following | Regular Exercise | Non Alcoholic | Regular      | High Class   |
| Not Following | Regular Exercise | Non Alcoholic | Regular      | High Class   |
| Following     | Regular Exercise | Alcoholic     | Occasionally | Poor         |
| Not Following | No Exercise      | Non Alcoholic | Regular      | High Class   |



|               |                  |               |              |              |
|---------------|------------------|---------------|--------------|--------------|
| Not Following | Regular Exercise | Non Alcoholic | Regular      | Middle Class |
| Following     | No Exercise      | Non Alcoholic | Regular      | Poor         |
| Following     | Regular Exercise | Non Alcoholic | Occasionally | High Class   |
| Not Following | No Exercise      | Non Alcoholic | Regular      | Middle Class |
| Not Following | Regular Exercise | Non Alcoholic | Regular      | High Class   |
| Occasionally  | Regular Exercise | Non Alcoholic | Regular      | Middle Class |
| Not Following | No Exercise      | Non Alcoholic | Regular      | Poor         |
| Following     | Regular Exercise | Non Alcoholic | Regular      | High Class   |
| Not Following | No Exercise      | Occasionally  | Regular      | Middle Class |
| Following     | Regular Exercise | Non Alcoholic | Regular      | High Class   |
| Not Following | No Exercise      | Non Alcoholic | Regular      | High Class   |
| Following     | Regular Exercise | Non Alcoholic | Occasionally | High Class   |
| Not Following | No Exercise      | Non Alcoholic | Regular      | High Class   |
| Following     | Regular Exercise | Non Alcoholic | Regular      | Poor         |
| Following     | No Exercise      | Non Alcoholic | Occasionally | Poor         |
| Not Following | Regular Exercise | Non Alcoholic | Regular      | High Class   |
| Following     | Regular Exercise | Non Alcoholic | Occasionally | Poor         |
| Not Following | Regular Exercise | Non Alcoholic | Regular      | High Class   |
| Following     | No Exercise      | Non Alcoholic | Regular      | Poor         |
| Not Following | No Exercise      | Non Alcoholic | Occasionally | High Class   |
| Not Following | Regular Exercise | Non Alcoholic | Regular      | High Class   |
| Following     | Regular Exercise | Alcoholic     | Regular      | Poor         |
| Following     | Regular Exercise | Non Alcoholic | Regular      | High Class   |
| Following     | Regular Exercise | Non Alcoholic | Non Smoker   | High Class   |
| Following     | Regular Exercise | Non Alcoholic | Regular      | High Class   |
| Not Following | No Exercise      | Non Alcoholic | Regular      | Middle Class |
| Not Following | Regular Exercise | Non Alcoholic | Regular      | Middle Class |
| Following     | No Exercise      | Non Alcoholic | Regular      | Poor         |
| Not Following | Regular Exercise | Alcoholic     | Regular      | Middle Class |
| Not Following | Regular Exercise | Non Alcoholic | Regular      | Poor         |
| Following     | Regular Exercise | Non Alcoholic | Regular      | Poor         |
| Following     | Regular Exercise | Non Alcoholic | Regular      | Poor         |
| Following     | No Exercise      | Non Alcoholic | Occasionally | Middle Class |
| Occasionally  | No Exercise      | Non Alcoholic | Regular      | Middle Class |
| Following     | Regular Exercise | Non Alcoholic | Regular      | Poor         |
| Following     | Regular Exercise | Alcoholic     | Occasionally | Poor         |
| Occasionally  | No Exercise      | Non Alcoholic | Regular      | Middle Class |
| Following     | Regular Exercise | Non Alcoholic | Occasionally | Poor         |
| Following     | No Exercise      | Non Alcoholic | Regular      | Poor         |
| Occasionally  | Regular Exercise | Non Alcoholic | Regular      | Middle Class |
| Not Following | Regular Exercise | Non Alcoholic | Occasionally | Middle Class |
| Following     | No Exercise      | Non Alcoholic | Regular      | Poor         |
| Following     | Regular Exercise | Non Alcoholic | Regular      | Poor         |
| Not Following | No Exercise      | Alcoholic     | Regular      | High Class   |
| Not Following | Regular Exercise | Non Alcoholic | Occasionally | High Class   |
| Not Following | Regular Exercise | Non Alcoholic | Regular      | High Class   |
| Following     | No Exercise      | Non Alcoholic | Regular      | Poor         |

|               |                  |               |              |              |
|---------------|------------------|---------------|--------------|--------------|
| Following     | Occasionally     | Non Alcoholic | Regular      | Poor         |
| Following     | No Exercise      | Non Alcoholic | Regular      | Poor         |
| Not Following | Regular Exercise | Non Alcoholic | Regular      | High Class   |
| Following     | Regular Exercise | Non Alcoholic | Regular      | Middle Class |
| Occasionally  | Regular Exercise | Non Alcoholic | Regular      | Poor         |
| Not Following | Regular Exercise | Non Alcoholic | Regular      | Middle Class |
| Not Following | No Exercise      | Non Alcoholic | Occasionally | Middle Class |
| Following     | No Exercise      | Non Alcoholic | Regular      | Poor         |
| Following     | Regular Exercise | Non Alcoholic | Regular      | Poor         |
| Following     | No Exercise      | Alcoholic     | Occasionally | Poor         |
| Following     | Regular Exercise | Non Alcoholic | Regular      | Poor         |
| Following     | No Exercise      | Non Alcoholic | Occasionally | Poor         |
| Not Following | Regular Exercise | Non Alcoholic | Regular      | Middle Class |
| Following     | Regular Exercise | Non Alcoholic | Regular      | Middle Class |
| Not Following | Regular Exercise | Non Alcoholic | Occasionally | Poor         |
| Following     | No Exercise      | Non Alcoholic | Regular      | Poor         |
| Not Following | Regular Exercise | Non Alcoholic | Regular      | High Class   |
| Not Following | No Exercise      | Alcoholic     | Regular      | High Class   |
| Following     | Regular Exercise | Non Alcoholic | Occasionally | High Class   |
| Following     | Regular Exercise | Non Alcoholic | Regular      | Middle Class |
| Not Following | Regular Exercise | Non Alcoholic | Regular      | High Class   |
| Following     | Regular Exercise | Non Alcoholic | Regular      | Poor         |
| Not Following | Regular Exercise | Non Alcoholic | Regular      | High Class   |
| Occasionally  | Regular Exercise | Non Alcoholic | Regular      | Poor         |
| Not Following | Regular Exercise | Non Alcoholic | Regular      | High Class   |
| Not Following | Regular Exercise | Non Alcoholic | Regular      | High Class   |
| Not Following | Regular Exercise | Non Alcoholic | Regular      | Middle Class |
| Occasionally  | Regular Exercise | Non Alcoholic | Occasionally | High Class   |
| Not Following | No Exercise      | Non Alcoholic | Regular      | Poor         |
| Occasionally  | No Exercise      | Non Alcoholic | Regular      | High Class   |
| Occasionally  | Regular Exercise | Non Alcoholic | Occasionally | Poor         |
| Following     | Regular Exercise | Non Alcoholic | Regular      | High Class   |
| Not Following | Regular Exercise | Alcoholic     | Occasionally | High Class   |
| Not Following | No Exercise      | Alcoholic     | Regular      | High Class   |
| Occasionally  | Regular Exercise | Non Alcoholic | Non Smoker   | Poor         |
| Following     | Regular Exercise | Non Alcoholic | Non Smoker   | Poor         |
| Occasionally  | Regular Exercise | Non Alcoholic | Non Smoker   | Middle Class |
| Following     | Occasionally     | Alcoholic     | Regular      | Middle Class |
| Occasionally  | Regular Exercise | Alcoholic     | Regular      | Middle Class |
| Following     | Occasionally     | Alcoholic     | Regular      | Poor         |
| Occasionally  | Occasionally     | Alcoholic     | Regular      | Poor         |
| Occasionally  | Regular Exercise | Occasionally  | Non Smoker   | Poor         |
| Not Following | Regular Exercise | Occasionally  | Regular      | Poor         |
| Not Following | Occasionally     | Occasionally  | Regular      | High Class   |
| Following     | No Exercise      | Occasionally  | Occasionally | High Class   |
| Not Following | Regular Exercise | Occasionally  | Occasionally | Poor         |
| Following     | Regular Exercise | Occasionally  | Occasionally | Poor         |

|               |                  |               |              |              |
|---------------|------------------|---------------|--------------|--------------|
| Following     | Occasionally     | Non Alcoholic | Non Smoker   | Poor         |
| Occasionally  | Occasionally     | Non Alcoholic | Non Smoker   | Poor         |
| Occasionally  | Occasionally     | Non Alcoholic | Regular      | High Class   |
| Following     | Regular Exercise | Alcoholic     | Regular      | High Class   |
| Occasionally  | Regular Exercise | Alcoholic     | Regular      | Poor         |
| Occasionally  | No Exercise      | Alcoholic     | Non Smoker   | Middle Class |
| Following     | No Exercise      | Alcoholic     | Non Smoker   | Poor         |
| Following     | No Exercise      | Non Alcoholic | Occasionally | Poor         |
| Occasionally  | No Exercise      | Non Alcoholic | Occasionally | Middle Class |
| Not Following | No Exercise      | Non Alcoholic | Regular      | Middle Class |
| Occasionally  | No Exercise      | Non Alcoholic | Non Smoker   | Poor         |
| Occasionally  | Regular Exercise | Non Alcoholic | Regular      | Poor         |
| Following     | Regular Exercise | Non Alcoholic | Regular      | Poor         |
| Following     | Occasionally     | Alcoholic     | Non Smoker   | Middle Class |
| Not Following | Occasionally     | Alcoholic     | Non Smoker   | High Class   |
| Occasionally  | Regular Exercise | Occasionally  | Occasionally | Poor         |
| Occasionally  | No Exercise      | Alcoholic     | Occasionally | High Class   |
| Not Following | No Exercise      | Non Alcoholic | Non Smoker   | Middle Class |
| Occasionally  | Regular Exercise | Non Alcoholic | Non Smoker   | Poor         |
| Occasionally  | Regular Exercise | Non Alcoholic | Regular      | High Class   |
| Occasionally  | Regular Exercise | Non Alcoholic | Regular      | High Class   |
| Occasionally  | Regular Exercise | Non Alcoholic | Regular      | High Class   |
| Not Following | No Exercise      | Non Alcoholic | Regular      | Poor         |
| Occasionally  | No Exercise      | Occasionally  | Regular      | Poor         |
| Following     | Occasionally     | Occasionally  | Non Smoker   | Poor         |
| Following     | Occasionally     | Occasionally  | Non Smoker   | High Class   |
| Not Following | No Exercise      | Alcoholic     | Non Smoker   | Poor         |
| Not Following | Occasionally     | Alcoholic     | Non Smoker   | Poor         |
| Occasionally  | Regular Exercise | Alcoholic     | Occasionally | Poor         |
| Not Following | Regular Exercise | Occasionally  | Occasionally | High Class   |
| Occasionally  | Occasionally     | Occasionally  | Occasionally | Poor         |
| Not Following | Regular Exercise | Occasionally  | Occasionally | High Class   |
| Occasionally  | Regular Exercise | Alcoholic     | Non Smoker   | Poor         |
| Occasionally  | Regular Exercise | Alcoholic     | Non Smoker   | High Class   |
| Following     | Occasionally     | Non Alcoholic | Non Smoker   | High Class   |
| Following     | No Exercise      | Non Alcoholic | Regular      | Middle Class |
| Not Following | Regular Exercise | Occasionally  | Regular      | High Class   |
| Occasionally  | Occasionally     | Non Alcoholic | Occasionally | Middle Class |
| Occasionally  | No Exercise      | Occasionally  | Occasionally | High Class   |
| Not Following | No Exercise      | Alcoholic     | Regular      | Middle Class |
| Following     | Occasionally     | Alcoholic     | Regular      | Poor         |
| Following     | Regular Exercise | Alcoholic     | Occasionally | High Class   |
| Following     | Regular Exercise | Occasionally  | Occasionally | Middle Class |
| Following     | Regular Exercise | Alcoholic     | Non Smoker   | High Class   |
| Not Following | Regular Exercise | Alcoholic     | Non Smoker   | Middle Class |
| Following     | Regular Exercise | Alcoholic     | Non Smoker   | Poor         |
| Not Following | No Exercise      | Non Alcoholic | Non Smoker   | High Class   |

|               |                  |               |              |              |
|---------------|------------------|---------------|--------------|--------------|
| Following     | No Exercise      | Non Alcoholic | Regular      | Middle Class |
| Not Following | No Exercise      | Non Alcoholic | Non Smoker   | High Class   |
| Not Following | Occasionally     | Occasionally  | Occasionally | High Class   |
| Not Following | No Exercise      | Non Alcoholic | Occasionally | High Class   |
| Occasionally  | Regular Exercise | Alcoholic     | Occasionally | High Class   |
| Occasionally  | Occasionally     | Non Alcoholic | Occasionally | Poor         |
| Not Following | No Exercise      | Occasionally  | Occasionally | Poor         |
| Following     | Regular Exercise | Alcoholic     | Occasionally | High Class   |
| Following     | Regular Exercise | Non Alcoholic | Non Smoker   | Poor         |
| Occasionally  | No Exercise      | Occasionally  | Non Smoker   | High Class   |
| Occasionally  | Occasionally     | Alcoholic     | Non Smoker   | Poor         |
| Occasionally  | No Exercise      | Occasionally  | Regular      | High Class   |
| Following     | No Exercise      | Occasionally  | Regular      | High Class   |
| Occasionally  | Regular Exercise | Occasionally  | Regular      | Poor         |
| Not Following | Regular Exercise | Non Alcoholic | Regular      | High Class   |
| Following     | Occasionally     | Non Alcoholic | Regular      | High Class   |
| Occasionally  | Occasionally     | Non Alcoholic | Non Smoker   | High Class   |
| Not Following | No Exercise      | Non Alcoholic | Non Smoker   | Middle Class |
| Occasionally  | Occasionally     | Non Alcoholic | Non Smoker   | Middle Class |
| Occasionally  | Regular Exercise | Non Alcoholic | Non Smoker   | Poor         |
| Occasionally  | No Exercise      | Alcoholic     | Non Smoker   | Middle Class |
| Not Following | Occasionally     | Alcoholic     | Non Smoker   | Poor         |
| Not Following | Regular Exercise | Alcoholic     | Non Smoker   | Poor         |
| Following     | No Exercise      | Non Alcoholic | Occasionally | Poor         |
| Following     | Regular Exercise | Alcoholic     | Occasionally | Middle Class |
| Not Following | Occasionally     | Non Alcoholic | Occasionally | Middle Class |
| Occasionally  | No Exercise      | Occasionally  | Occasionally | Poor         |
| Not Following | Regular Exercise | Occasionally  | Non Smoker   | Poor         |
| Following     | Regular Exercise | Non Alcoholic | Non Smoker   | Poor         |
| Occasionally  | Occasionally     | Non Alcoholic | Non Smoker   | Middle Class |
| Occasionally  | Occasionally     | Non Alcoholic | Non Smoker   | Middle Class |
| Occasionally  | Occasionally     | Occasionally  | Regular      | Poor         |
| Not Following | Regular Exercise | Alcoholic     | Regular      | Poor         |
| Not Following | Regular Exercise | Alcoholic     | Regular      | High Class   |
| Following     | Regular Exercise | Alcoholic     | Regular      | High Class   |
| Following     | Regular Exercise | Alcoholic     | Regular      | High Class   |
| Not Following | Regular Exercise | Alcoholic     | Regular      | Middle Class |
| Occasionally  | No Exercise      | Non Alcoholic | Regular      | High Class   |
| Following     | No Exercise      | Non Alcoholic | Non Smoker   | Poor         |
| Not Following | Occasionally     | Alcoholic     | Non Smoker   | Poor         |
| Not Following | Occasionally     | Non Alcoholic | Regular      | Middle Class |
| Following     | Occasionally     | Non Alcoholic | Regular      | Middle Class |
| Following     | No Exercise      | Non Alcoholic | Non Smoker   | Poor         |
| Following     | No Exercise      | Non Alcoholic | Regular      | Poor         |
| Following     | No Exercise      | Occasionally  | Non Smoker   | High Class   |
| Occasionally  | No Exercise      | Occasionally  | Non Smoker   | High Class   |
| Occasionally  | Regular Exercise | Occasionally  | Non Smoker   | High Class   |

|               |                  |               |              |              |
|---------------|------------------|---------------|--------------|--------------|
| Following     | Regular Exercise | Non Alcoholic | Occasionally | High Class   |
| Following     | Occasionally     | Non Alcoholic | Occasionally | Middle Class |
| Not Following | No Exercise      | Non Alcoholic | Occasionally | High Class   |
| Not Following | No Exercise      | Alcoholic     | Non Smoker   | Middle Class |
| Not Following | No Exercise      | Alcoholic     | Non Smoker   | High Class   |
| Not Following | No Exercise      | Alcoholic     | Non Smoker   | Middle Class |
| Not Following | No Exercise      | Alcoholic     | Non Smoker   | High Class   |
| Occasionally  | No Exercise      | Alcoholic     | Non Smoker   | Middle Class |
| Not Following | No Exercise      | Alcoholic     | Occasionally | Poor         |
| Not Following | Regular Exercise | Alcoholic     | Occasionally | Middle Class |
| Following     | Regular Exercise | Alcoholic     | Occasionally | Poor         |
| Following     | No Exercise      | Alcoholic     | Non Smoker   | Poor         |
| Following     | No Exercise      | Occasionally  | Non Smoker   | Poor         |
| Occasionally  | Occasionally     | Occasionally  | Non Smoker   | High Class   |
| Occasionally  | Occasionally     | Occasionally  | Regular      | Poor         |
| Not Following | No Exercise      | Occasionally  | Regular      | High Class   |
| Not Following | Regular Exercise | Occasionally  | Regular      | Poor         |
| Not Following | No Exercise      | Occasionally  | Non Smoker   | High Class   |
| Occasionally  | Occasionally     | Non Alcoholic | Non Smoker   | High Class   |
| Occasionally  | No Exercise      | Non Alcoholic | Non Smoker   | Middle Class |
| Following     | Regular Exercise | Non Alcoholic | Non Smoker   | High Class   |
| Following     | Occasionally     | Non Alcoholic | Regular      | Middle Class |
| Following     | No Exercise      | Non Alcoholic | Regular      | High Class   |
| Not Following | Occasionally     | Non Alcoholic | Regular      | Middle Class |
| Occasionally  | Regular Exercise | Non Alcoholic | Occasionally | Poor         |
| Following     | No Exercise      | Non Alcoholic | Non Smoker   | High Class   |
| Following     | Regular Exercise | Non Alcoholic | Non Smoker   | Middle Class |
| Following     | Regular Exercise | Non Alcoholic | Non Smoker   | High Class   |
| Following     | No Exercise      | Non Alcoholic | Non Smoker   | Middle Class |
| Following     | No Exercise      | Occasionally  | Regular      | Poor         |
| Occasionally  | No Exercise      | Occasionally  | Regular      | High Class   |
| Occasionally  | No Exercise      | Occasionally  | Regular      | Middle Class |
| Following     | Regular Exercise | Occasionally  | Occasionally | High Class   |
| Not Following | Regular Exercise | Occasionally  | Occasionally | High Class   |
| Not Following | Occasionally     | Occasionally  | Occasionally | High Class   |
| Following     | Occasionally     | Alcoholic     | Regular      | High Class   |
| Following     | Regular Exercise | Alcoholic     | Regular      | Poor         |
| Occasionally  | No Exercise      | Alcoholic     | Non Smoker   | Poor         |
| Occasionally  | Regular Exercise | Non Alcoholic | Regular      | High Class   |
| Not Following | Regular Exercise | Non Alcoholic | Regular      | Poor         |
| Not Following | Occasionally     | Non Alcoholic | Non Smoker   | High Class   |
| Occasionally  | Occasionally     | Occasionally  | Non Smoker   | Poor         |
| Occasionally  | Regular Exercise | Occasionally  | Non Smoker   | High Class   |
| Occasionally  | Occasionally     | Non Alcoholic | Non Smoker   | High Class   |
| Occasionally  | Occasionally     | Occasionally  | Occasionally | Poor         |
| Occasionally  | Regular Exercise | Occasionally  | Occasionally | High Class   |
| Occasionally  | No Exercise      | Non Alcoholic | Regular      | High Class   |



|               |                  |               |              |              |
|---------------|------------------|---------------|--------------|--------------|
| Occasionally  | No Exercise      | Alcoholic     | Regular      | High Class   |
| Occasionally  | No Exercise      | Alcoholic     | Regular      | Middle Class |
| Occasionally  | No Exercise      | Non Alcoholic | Regular      | Middle Class |
| Occasionally  | No Exercise      | Occasionally  | Regular      | Poor         |
| Occasionally  | Occasionally     | Occasionally  | Non Smoker   | Middle Class |
| Occasionally  | Occasionally     | Alcoholic     | Non Smoker   | Poor         |
| Occasionally  | Regular Exercise | Non Alcoholic | Non Smoker   | Poor         |
| Occasionally  | Regular Exercise | Alcoholic     | Regular      | Poor         |
| Occasionally  | Regular Exercise | Non Alcoholic | Non Smoker   | Middle Class |
| Occasionally  | Regular Exercise | Non Alcoholic | Occasionally | Middle Class |
| Not Following | Regular Exercise | Non Alcoholic | Non Smoker   | Poor         |
| Occasionally  | Regular Exercise | Non Alcoholic | Non Smoker   | Poor         |
| Following     | Regular Exercise | Non Alcoholic | Non Smoker   | Middle Class |
| Not Following | Regular Exercise | Non Alcoholic | Non Smoker   | Poor         |
| Following     | Regular Exercise | Non Alcoholic | Non Smoker   | Poor         |
| Following     | Regular Exercise | Non Alcoholic | Non Smoker   | Middle Class |
| Following     | Regular Exercise | Non Alcoholic | Occasionally | Middle Class |
| Following     | No Exercise      | Alcoholic     | Non Smoker   | Poor         |
| Following     | No Exercise      | Non Alcoholic | Non Smoker   | Poor         |
| Following     | No Exercise      | Non Alcoholic | Regular      | High Class   |
| Following     | Regular Exercise | Alcoholic     | Regular      | High Class   |
| Following     | No Exercise      | Occasionally  | Regular      | High Class   |
| Following     | No Exercise      | Alcoholic     | Regular      | Poor         |
| Occasionally  | No Exercise      | Occasionally  | Regular      | Poor         |
| Not Following | Regular Exercise | Non Alcoholic | Occasionally | Poor         |
| Following     | Regular Exercise | Non Alcoholic | Regular      | High Class   |
| Not Following | No Exercise      | Occasionally  | Occasionally | Middle Class |
| Occasionally  | Regular Exercise | Non Alcoholic | Non Smoker   | Poor         |
| Following     | No Exercise      | Non Alcoholic | Non Smoker   | Middle Class |
| Occasionally  | No Exercise      | Non Alcoholic | Occasionally | Middle Class |
| Occasionally  | Occasionally     | Non Alcoholic | Occasionally | Poor         |
| Following     | Regular Exercise | Non Alcoholic | Regular      | Poor         |
| Occasionally  | Occasionally     | Non Alcoholic | Regular      | Poor         |
| Not Following | No Exercise      | Non Alcoholic | Occasionally | Poor         |
| Following     | Regular Exercise | Occasionally  | Occasionally | Poor         |
| Not Following | Occasionally     | Non Alcoholic | Regular      | Middle Class |
| Following     | Regular Exercise | Alcoholic     | Regular      | Middle Class |
| Not Following | Regular Exercise | Alcoholic     | Regular      | Poor         |
| Not Following | No Exercise      | Non Alcoholic | Non Smoker   | Poor         |
| Following     | Regular Exercise | Occasionally  | Non Smoker   | High Class   |
| Occasionally  | No Exercise      | Occasionally  | Regular      | High Class   |
| Not Following | Regular Exercise | Non Alcoholic | Regular      | High Class   |
| Occasionally  | No Exercise      | Non Alcoholic | Occasionally | Middle Class |
| Not Following | No Exercise      | Non Alcoholic | Non Smoker   | High Class   |
| Following     | No Exercise      | Non Alcoholic | Regular      | Poor         |
| Following     | Regular Exercise | Non Alcoholic | Non Smoker   | High Class   |
| Following     | No Exercise      | Non Alcoholic | Non Smoker   | Poor         |

|               |                  |               |              |              |
|---------------|------------------|---------------|--------------|--------------|
| Following     | No Exercise      | Non Alcoholic | Non Smoker   | High Class   |
| Following     | Regular Exercise | Non Alcoholic | Non Smoker   | High Class   |
| Following     | Regular Exercise | Non Alcoholic | Regular      | Middle Class |
| Occasionally  | No Exercise      | Alcoholic     | Regular      | High Class   |
| Following     | No Exercise      | Non Alcoholic | Non Smoker   | Poor         |
| Occasionally  | No Exercise      | Non Alcoholic | Non Smoker   | High Class   |
| Not Following | No Exercise      | Non Alcoholic | Occasionally | Poor         |
| Occasionally  | Occasionally     | Non Alcoholic | Non Smoker   | High Class   |
| Occasionally  | No Exercise      | Non Alcoholic | Non Smoker   | High Class   |
| Occasionally  | No Exercise      | Non Alcoholic | Non Smoker   | High Class   |
| Not Following | Regular Exercise | Occasionally  | Regular      | Poor         |
| Occasionally  | Occasionally     | Non Alcoholic | Non Smoker   | High Class   |
| Occasionally  | No Exercise      | Non Alcoholic | Non Smoker   | High Class   |
| Not Following | No Exercise      | Non Alcoholic | Occasionally | High Class   |
| Occasionally  | No Exercise      | Non Alcoholic | Non Smoker   | Middle Class |
| Occasionally  | No Exercise      | Non Alcoholic | Non Smoker   | Poor         |
| Not Following | No Exercise      | Occasionally  | Non Smoker   | Poor         |
| Not Following | No Exercise      | Alcoholic     | Regular      | High Class   |
| Occasionally  | Regular Exercise | Non Alcoholic | Non Smoker   | Poor         |
| Occasionally  | No Exercise      | Occasionally  | Non Smoker   | Middle Class |
| Occasionally  | No Exercise      | Non Alcoholic | Non Smoker   | Middle Class |
| Occasionally  | Occasionally     | Non Alcoholic | Occasionally | Poor         |
| Not Following | Regular Exercise | Non Alcoholic | Occasionally | Poor         |
| Occasionally  | No Exercise      | Occasionally  | Non Smoker   | High Class   |
| Occasionally  | Regular Exercise | Non Alcoholic | Occasionally | High Class   |
| Occasionally  | No Exercise      | Occasionally  | Non Smoker   | High Class   |
| Occasionally  | No Exercise      | Occasionally  | Non Smoker   | High Class   |
| Following     | No Exercise      | Non Alcoholic | Regular      | Middle Class |
| Following     | No Exercise      | Non Alcoholic | Non Smoker   | High Class   |
| Occasionally  | No Exercise      | Occasionally  | Non Smoker   | Middle Class |
| Not Following | Regular Exercise | Non Alcoholic | Non Smoker   | High Class   |
| Occasionally  | Occasionally     | Occasionally  | Non Smoker   | Middle Class |
| Following     | No Exercise      | Occasionally  | Non Smoker   | High Class   |
| Occasionally  | Occasionally     | Occasionally  | Non Smoker   | Middle Class |
| Occasionally  | Occasionally     | Non Alcoholic | Non Smoker   | Poor         |
| Occasionally  | No Exercise      | Non Alcoholic | Non Smoker   | Middle Class |
| Occasionally  | No Exercise      | Non Alcoholic | Non Smoker   | Poor         |
| Following     | Occasionally     | Non Alcoholic | Occasionally | Poor         |
| Not Following | No Exercise      | Alcoholic     | Occasionally | Poor         |
| Following     | No Exercise      | Non Alcoholic | Non Smoker   | High Class   |
| Not Following | No Exercise      | Occasionally  | Non Smoker   | Poor         |
| Following     | Occasionally     | Occasionally  | Non Smoker   | High Class   |
| Not Following | No Exercise      | Alcoholic     | Occasionally | Poor         |
| Occasionally  | No Exercise      | Occasionally  | Non Smoker   | High Class   |
| Not Following | No Exercise      | Non Alcoholic | Regular      | High Class   |
| Occasionally  | No Exercise      | Occasionally  | Non Smoker   | Middle Class |
| Occasionally  | Occasionally     | Non Alcoholic | Non Smoker   | High Class   |

|                            |                  |               |              |              |
|----------------------------|------------------|---------------|--------------|--------------|
| Occasionally Following     | No Exercise      | Non Alcoholic | Non Smoker   | Middle Class |
| Occasionally Following     | No Exercise      | Occasionally  | Non Smoker   | High Class   |
| Occasionally Following     | No Exercise      | Non Alcoholic | Non Smoker   | Middle Class |
| Occasionally Following     | Occasionally     | Non Alcoholic | Non Smoker   | Poor         |
| Occasionally Following     | No Exercise      | Non Alcoholic | Regular      | Middle Class |
| Occasionally Following     | No Exercise      | Non Alcoholic | Regular      | Middle Class |
| Occasionally Following     | No Exercise      | Non Alcoholic | Regular      | Poor         |
| Occasionally Not Following | Regular Exercise | Non Alcoholic | Non Smoker   | Middle Class |
| Occasionally Not Following | No Exercise      | Non Alcoholic | Non Smoker   | Poor         |
| Occasionally Not Following | Occasionally     | Non Alcoholic | Occasionally | Poor         |
| Occasionally Not Following | Regular Exercise | Occasionally  | Occasionally | Poor         |
| Occasionally Not Following | No Exercise      | Non Alcoholic | Non Smoker   | Middle Class |
| Occasionally Following     | Regular Exercise | Occasionally  | Occasionally | Middle Class |
| Occasionally Not Following | No Exercise      | Non Alcoholic | Regular      | Poor         |
| Occasionally Following     | Regular Exercise | Non Alcoholic | Occasionally | Poor         |
| Occasionally Following     | No Exercise      | Non Alcoholic | Regular      | Middle Class |
| Occasionally Following     | Regular Exercise | Non Alcoholic | Regular      | Poor         |
| Occasionally Not Following | Regular Exercise | Non Alcoholic | Occasionally | Poor         |
| Occasionally Following     | Regular Exercise | Non Alcoholic | Regular      | Middle Class |
| Occasionally Following     | No Exercise      | Non Alcoholic | Regular      | Middle Class |
| Occasionally Not Following | Regular Exercise | Non Alcoholic | Regular      | Poor         |
| Occasionally Following     | Regular Exercise | Non Alcoholic | Occasionally | Poor         |
| Occasionally Following     | Regular Exercise | Non Alcoholic | Regular      | Middle Class |
| Occasionally Following     | No Exercise      | Non Alcoholic | Regular      | Middle Class |
| Occasionally Not Following | Regular Exercise | Non Alcoholic | Regular      | Poor         |
| Occasionally Not Following | No Exercise      | Non Alcoholic | Regular      | Poor         |
| Occasionally Following     | Regular Exercise | Non Alcoholic | Regular      | Poor         |
| Occasionally Not Following | Regular Exercise | Non Alcoholic | Occasionally | Poor         |
| Occasionally Following     | No Exercise      | Non Alcoholic | Regular      | Poor         |
| Occasionally Following     | Regular Exercise | Non Alcoholic | Regular      | Poor         |
| Occasionally Not Following | No Exercise      | Non Alcoholic | Occasionally | Middle Class |
| Occasionally Following     | Regular Exercise | Non Alcoholic | Regular      | Middle Class |
| Occasionally Following     | Regular Exercise | Non Alcoholic | Regular      | Poor         |
| Occasionally Not Following | No Exercise      | Non Alcoholic | Regular      | Poor         |
| Occasionally Following     | Regular Exercise | Non Alcoholic | Occasionally | High Class   |
| Occasionally Following     | No Exercise      | Occasionally  | Regular      | High Class   |
| Occasionally Following     | Regular Exercise | Non Alcoholic | Regular      | High Class   |
| Occasionally Not Following | Regular Exercise | Non Alcoholic | Regular      | Middle Class |
| Occasionally Not Following | No Exercise      | Non Alcoholic | Regular      | High Class   |

|               |                  |               |              |              |
|---------------|------------------|---------------|--------------|--------------|
| Following     | Regular Exercise | Non Alcoholic | Regular      | Poor         |
| Occasionally  | No Exercise      | Non Alcoholic | Regular      | High Class   |
| Occasionally  | Regular Exercise | Non Alcoholic | Regular      | Poor         |
| Following     | No Exercise      | Non Alcoholic | Regular      | High Class   |
| Occasionally  | Regular Exercise | Non Alcoholic | Occasionally | High Class   |
| Not Following | No Exercise      | Alcoholic     | Regular      | Middle Class |
| Not Following | Regular Exercise | Non Alcoholic | Regular      | High Class   |
| Following     | Regular Exercise | Non Alcoholic | Occasionally | Poor         |
| Following     | Occasionally     | Non Alcoholic | Regular      | High Class   |
| Following     | Regular Exercise | Non Alcoholic | Occasionally | Poor         |
| Not Following | Regular Exercise | Non Alcoholic | Non Smoker   | High Class   |
| Not Following | No Exercise      | Non Alcoholic | Regular      | High Class   |
| Occasionally  | Regular Exercise | Non Alcoholic | Occasionally | High Class   |
| Not Following | No Exercise      | Non Alcoholic | Regular      | Poor         |
| Not Following | Regular Exercise | Non Alcoholic | Regular      | High Class   |
| Not Following | Regular Exercise | Alcoholic     | Regular      | High Class   |
| Occasionally  | Occasionally     | Non Alcoholic | Occasionally | High Class   |
| Occasionally  | No Exercise      | Non Alcoholic | Regular      | Middle Class |
| Occasionally  | Regular Exercise | Non Alcoholic | Regular      | Poor         |
| Not Following | No Exercise      | Non Alcoholic | Regular      | Poor         |
| Following     | Regular Exercise | Non Alcoholic | Regular      | High Class   |
| Following     | No Exercise      | Non Alcoholic | Regular      | Poor         |
| Following     | Regular Exercise | Non Alcoholic | Regular      | Middle Class |
| Following     | Regular Exercise | Non Alcoholic | Regular      | Middle Class |
| Following     | No Exercise      | Non Alcoholic | Regular      | Poor         |
| Occasionally  | Regular Exercise | Non Alcoholic | Occasionally | Poor         |
| Following     | No Exercise      | Alcoholic     | Regular      | High Class   |
| Not Following | Regular Exercise | Non Alcoholic | Regular      | High Class   |
| Following     | No Exercise      | Non Alcoholic | Occasionally | High Class   |
| Not Following | Regular Exercise | Non Alcoholic | Non Smoker   | High Class   |
| Not Following | Occasionally     | Non Alcoholic | Occasionally | Middle Class |
| Not Following | Regular Exercise | Non Alcoholic | Regular      | High Class   |
| Not Following | Regular Exercise | Non Alcoholic | Regular      | Middle Class |
| Following     | No Exercise      | Non Alcoholic | Regular      | Middle Class |
| Not Following | Regular Exercise | Occasionally  | Regular      | Middle Class |
| Following     | No Exercise      | Non Alcoholic | Occasionally | Middle Class |
| Following     | Regular Exercise | Non Alcoholic | Regular      | Middle Class |
| Not Following | No Exercise      | Non Alcoholic | Non Smoker   | Middle Class |
| Following     | Regular Exercise | Non Alcoholic | Regular      | Middle Class |
| Following     | No Exercise      | Non Alcoholic | Regular      | Middle Class |
| Not Following | Regular Exercise | Non Alcoholic | Regular      | Middle Class |
| Not Following | Occasionally     | Non Alcoholic | Regular      | Middle Class |
| Not Following | Occasionally     | Non Alcoholic | Regular      | Middle Class |
| Following     | Regular Exercise | Non Alcoholic | Regular      | Poor         |
| Following     | No Exercise      | Non Alcoholic | Occasionally | Poor         |
| Following     | No Exercise      | Non Alcoholic | Regular      | Poor         |
| Following     | Regular Exercise | Non Alcoholic | Regular      | Poor         |

|               |                  |               |              |              |
|---------------|------------------|---------------|--------------|--------------|
| Not Following | Regular Exercise | Non Alcoholic | Occasionally | High Class   |
| Following     | No Exercise      | Non Alcoholic | Regular      | High Class   |
| Following     | No Exercise      | Occasionally  | Occasionally | High Class   |
| Following     | No Exercise      | Non Alcoholic | Regular      | High Class   |
| Not Following | No Exercise      | Non Alcoholic | Regular      | High Class   |
| Not Following | Regular Exercise | Non Alcoholic | Occasionally | High Class   |
| Following     | No Exercise      | Non Alcoholic | Regular      | High Class   |
| Following     | Regular Exercise | Non Alcoholic | Regular      | High Class   |
| Not Following | Regular Exercise | Non Alcoholic | Regular      | High Class   |
| Following     | No Exercise      | Non Alcoholic | Occasionally | High Class   |
| Following     | Occasionally     | Non Alcoholic | Regular      | High Class   |
| Not Following | No Exercise      | Non Alcoholic | Regular      | High Class   |
| Following     | Regular Exercise | Non Alcoholic | Regular      | High Class   |
| Not Following | No Exercise      | Non Alcoholic | Regular      | High Class   |
| Following     | Regular Exercise | Non Alcoholic | Regular      | Poor         |
| Following     | Regular Exercise | Non Alcoholic | Regular      | Poor         |
| Not Following | Regular Exercise | Non Alcoholic | Regular      | Poor         |
| Following     | Regular Exercise | Non Alcoholic | Regular      | Poor         |
| Following     | Regular Exercise | Non Alcoholic | Occasionally | Poor         |
| Not Following | Regular Exercise | Non Alcoholic | Regular      | Middle Class |
| Occasionally  | Occasionally     | Non Alcoholic | Regular      | Poor         |
| Occasionally  | Regular Exercise | Non Alcoholic | Occasionally | Poor         |
| Occasionally  | Regular Exercise | Non Alcoholic | Regular      | Poor         |
| Not Following | Regular Exercise | Non Alcoholic | Occasionally | Middle Class |
| Occasionally  | Regular Exercise | Non Alcoholic | Regular      | Middle Class |
| Not Following | Regular Exercise | Non Alcoholic | Regular      | Middle Class |
| Occasionally  | Regular Exercise | Non Alcoholic | Occasionally | High Class   |
| Not Following | Regular Exercise | Non Alcoholic | Regular      | Poor         |
| Following     | Regular Exercise | Non Alcoholic | Regular      | Poor         |
| Not Following | Regular Exercise | Non Alcoholic | Regular      | Poor         |
| Not Following | Regular Exercise | Non Alcoholic | Occasionally | Middle Class |
| Following     | Regular Exercise | Non Alcoholic | Regular      | Poor         |
| Not Following | Regular Exercise | Non Alcoholic | Regular      | Middle Class |
| Occasionally  | Regular Exercise | Non Alcoholic | Regular      | Middle Class |
| Not Following | Regular Exercise | Non Alcoholic | Non Smoker   | Middle Class |
| Following     | No Exercise      | Non Alcoholic | Regular      | Poor         |
| Following     | No Exercise      | Non Alcoholic | Regular      | Poor         |
| Not Following | No Exercise      | Non Alcoholic | Regular      | Middle Class |
| Following     | No Exercise      | Non Alcoholic | Regular      | Poor         |
| Not Following | Regular Exercise | Non Alcoholic | Regular      | Poor         |
| Following     | Regular Exercise | Non Alcoholic | Occasionally | Poor         |
| Not Following | Regular Exercise | Non Alcoholic | Regular      | Middle Class |
| Not Following | No Exercise      | Non Alcoholic | Regular      | Middle Class |
| Not Following | Regular Exercise | Non Alcoholic | Occasionally | Middle Class |
| Following     | No Exercise      | Non Alcoholic | Regular      | Poor         |
| Not Following | Regular Exercise | Non Alcoholic | Non Smoker   | Poor         |
| Not Following | No Exercise      | Alcoholic     | Regular      | Poor         |

|               |                  |               |              |              |
|---------------|------------------|---------------|--------------|--------------|
| Not Following | Regular Exercise | Non Alcoholic | Regular      | Poor         |
| Following     | No Exercise      | Non Alcoholic | Occasionally | High Class   |
| Not Following | Regular Exercise | Non Alcoholic | Regular      | High Class   |
| Following     | Regular Exercise | Non Alcoholic | Regular      | Poor         |
| Not Following | Regular Exercise | Non Alcoholic | Regular      | Poor         |
| Not Following | Regular Exercise | Non Alcoholic | Occasionally | Poor         |
| Following     | Regular Exercise | Occasionally  | Regular      | Poor         |
| Not Following | Regular Exercise | Non Alcoholic | Regular      | High Class   |
| Following     | Regular Exercise | Non Alcoholic | Regular      | High Class   |
| Following     | Regular Exercise | Non Alcoholic | Regular      | Poor         |
| Occasionally  | Regular Exercise | Non Alcoholic | Regular      | Middle Class |
| Following     | Regular Exercise | Non Alcoholic | Regular      | Poor         |
| Following     | Regular Exercise | Non Alcoholic | Regular      | Poor         |
| Following     | Regular Exercise | Non Alcoholic | Regular      | Middle Class |
| Occasionally  | Regular Exercise | Non Alcoholic | Occasionally | Middle Class |
| Not Following | Regular Exercise | Non Alcoholic | Regular      | Poor         |
| Following     | Regular Exercise | Non Alcoholic | Regular      | Poor         |
| Occasionally  | No Exercise      | Non Alcoholic | Non Smoker   | Poor         |
| Not Following | Occasionally     | Non Alcoholic | Regular      | Middle Class |
| Following     | Occasionally     | Non Alcoholic | Occasionally | High Class   |
| Occasionally  | Regular Exercise | Non Alcoholic | Regular      | Poor         |
| Following     | No Exercise      | Non Alcoholic | Regular      | High Class   |
| Following     | Regular Exercise | Non Alcoholic | Occasionally | Middle Class |
| Not Following | No Exercise      | Non Alcoholic | Regular      | Poor         |
| Not Following | Regular Exercise | Alcoholic     | Regular      | High Class   |
| Not Following | No Exercise      | Non Alcoholic | Regular      | High Class   |
| Not Following | Regular Exercise | Non Alcoholic | Occasionally | High Class   |
| Following     | Occasionally     | Non Alcoholic | Regular      | Poor         |
| Following     | Regular Exercise | Non Alcoholic | Regular      | Poor         |
| Following     | Occasionally     | Non Alcoholic | Regular      | Poor         |
| Not Following | Regular Exercise | Non Alcoholic | Regular      | High Class   |
| Not Following | Regular Exercise | Non Alcoholic | Regular      | Poor         |
| Not Following | No Exercise      | Non Alcoholic | Regular      | Poor         |
| Following     | No Exercise      | Non Alcoholic | Regular      | Poor         |
| Not Following | Regular Exercise | Alcoholic     | Regular      | Poor         |
| Following     | No Exercise      | Non Alcoholic | Occasionally | High Class   |
| Not Following | Regular Exercise | Non Alcoholic | Regular      | High Class   |
| Following     | Occasionally     | Non Alcoholic | Regular      | Poor         |
| Following     | Regular Exercise | Non Alcoholic | Occasionally | Poor         |
| Not Following | Occasionally     | Non Alcoholic | Regular      | Poor         |
| Following     | Regular Exercise | Non Alcoholic | Occasionally | Poor         |
| Not Following | No Exercise      | Non Alcoholic | Regular      | High Class   |
| Not Following | Regular Exercise | Non Alcoholic | Regular      | High Class   |
| Following     | Occasionally     | Non Alcoholic | Occasionally | Poor         |
| Not Following | No Exercise      | Non Alcoholic | Regular      | Middle Class |
| Not Following | Regular Exercise | Non Alcoholic | Regular      | Poor         |
| Not Following | No Exercise      | Non Alcoholic | Regular      | Poor         |

|               |                  |               |              |              |
|---------------|------------------|---------------|--------------|--------------|
| Following     | No Exercise      | Alcoholic     | Occasionally | Middle Class |
| Not Following | Regular Exercise | Non Alcoholic | Non Smoker   | Middle Class |
| Following     | Regular Exercise | Non Alcoholic | Regular      | Poor         |
| Not Following | No Exercise      | Non Alcoholic | Regular      | Poor         |
| Not Following | Regular Exercise | Non Alcoholic | Regular      | Poor         |
| Occasionally  | Regular Exercise | Non Alcoholic | Regular      | Middle Class |
| Occasionally  | Occasionally     | Non Alcoholic | Regular      | High Class   |
| Not Following | Regular Exercise | Non Alcoholic | Regular      | Poor         |
| Occasionally  | No Exercise      | Non Alcoholic | Regular      | High Class   |
| Not Following | Regular Exercise | Non Alcoholic | Occasionally | Middle Class |
| Following     | Regular Exercise | Non Alcoholic | Regular      | Poor         |
| Not Following | Occasionally     | Alcoholic     | Regular      | Poor         |
| Following     | No Exercise      | Non Alcoholic | Occasionally | Poor         |
| Following     | No Exercise      | Non Alcoholic | Regular      | Poor         |
| Following     | Regular Exercise | Non Alcoholic | Occasionally | Poor         |
| Not Following | No Exercise      | Non Alcoholic | Regular      | Middle Class |
| Not Following | Regular Exercise | Non Alcoholic | Regular      | Middle Class |
| Not Following | Regular Exercise | Non Alcoholic | Occasionally | Middle Class |
| Following     | Regular Exercise | Non Alcoholic | Regular      | Middle Class |
| Not Following | No Exercise      | Non Alcoholic | Regular      | Middle Class |
| Following     | Regular Exercise | Non Alcoholic | Regular      | Middle Class |
| Following     | Regular Exercise | Occasionally  | Occasionally | Middle Class |
| Not Following | Regular Exercise | Non Alcoholic | Regular      | Middle Class |
| Following     | Regular Exercise | Non Alcoholic | Regular      | Poor         |
| Following     | Regular Exercise | Non Alcoholic | Regular      | Poor         |
| Following     | Regular Exercise | Non Alcoholic | Regular      | Poor         |
| Occasionally  | Occasionally     | Non Alcoholic | Regular      | Middle Class |
| Not Following | No Exercise      | Non Alcoholic | Occasionally | Middle Class |
| Occasionally  | Regular Exercise | Non Alcoholic | Regular      | Middle Class |
| Occasionally  | Regular Exercise | Non Alcoholic | Regular      | Middle Class |
| Following     | Regular Exercise | Non Alcoholic | Occasionally | Middle Class |
| Not Following | Regular Exercise | Occasionally  | Non Smoker   | Poor         |
| Following     | No Exercise      | Non Alcoholic | Regular      | Poor         |
| Not Following | Regular Exercise | Non Alcoholic | Occasionally | High Class   |
| Following     | No Exercise      | Occasionally  | Regular      | Poor         |
| Following     | Occasionally     | Occasionally  | Non Smoker   | Poor         |
| Occasionally  | Occasionally     | Non Alcoholic | Regular      | Middle Class |
| Not Following | Regular Exercise | Non Alcoholic | Regular      | High Class   |
| Occasionally  | No Exercise      | Non Alcoholic | Occasionally | High Class   |
| Occasionally  | Regular Exercise | Non Alcoholic | Regular      | Middle Class |
| Occasionally  | No Exercise      | Non Alcoholic | Regular      | High Class   |
| Occasionally  | Regular Exercise | Non Alcoholic | Non Smoker   | High Class   |
| Occasionally  | Regular Exercise | Non Alcoholic | Regular      | High Class   |
| Not Following | Regular Exercise | Alcoholic     | Occasionally | Middle Class |
| Not Following | Regular Exercise | Non Alcoholic | Regular      | High Class   |
| Following     | No Exercise      | Non Alcoholic | Regular      | Poor         |
| Not Following | Regular Exercise | Non Alcoholic | Occasionally | High Class   |

|               |                  |               |              |              |
|---------------|------------------|---------------|--------------|--------------|
| Following     | No Exercise      | Non Alcoholic | Regular      | Poor         |
| Occasionally  | No Exercise      | Non Alcoholic | Non Smoker   | Poor         |
| Occasionally  | Regular Exercise | Non Alcoholic | Regular      | High Class   |
| Occasionally  | No Exercise      | Non Alcoholic | Non Smoker   | Poor         |
| Occasionally  | Regular Exercise | Non Alcoholic | Regular      | Poor         |
| Occasionally  | No Exercise      | Alcoholic     | Regular      | High Class   |
| Occasionally  | Occasionally     | Non Alcoholic | Regular      | Middle Class |
| Following     | Occasionally     | Occasionally  | Regular      | High Class   |
| Occasionally  | No Exercise      | Occasionally  | Occasionally | Middle Class |
| Occasionally  | No Exercise      | Non Alcoholic | Regular      | Middle Class |
| Not Following | Regular Exercise | Non Alcoholic | Regular      | High Class   |
| Not Following | Regular Exercise | Occasionally  | Occasionally | High Class   |
| Occasionally  | No Exercise      | Non Alcoholic | Regular      | Poor         |
| Not Following | Regular Exercise | Non Alcoholic | Occasionally | Poor         |
| Occasionally  | Regular Exercise | Non Alcoholic | Regular      | Poor         |
| Occasionally  | No Exercise      | Non Alcoholic | Non Smoker   | Middle Class |
| Occasionally  | Regular Exercise | Non Alcoholic | Occasionally | High Class   |
| Occasionally  | No Exercise      | Non Alcoholic | Regular      | High Class   |
| Occasionally  | No Exercise      | Occasionally  | Regular      | High Class   |
| Occasionally  | No Exercise      | Non Alcoholic | Regular      | Poor         |
| Occasionally  | Regular Exercise | Occasionally  | Occasionally | Poor         |
| Occasionally  | Regular Exercise | Occasionally  | Regular      | Poor         |
| Occasionally  | No Exercise      | Occasionally  | Regular      | High Class   |
| Following     | Regular Exercise | Occasionally  | Regular      | Poor         |
| Following     | No Exercise      | Non Alcoholic | Non Smoker   | Poor         |
| Not Following | Regular Exercise | Non Alcoholic | Occasionally | High Class   |
| Following     | No Exercise      | Non Alcoholic | Regular      | Middle Class |
| Occasionally  | Regular Exercise | Non Alcoholic | Regular      | Middle Class |
| Occasionally  | Regular Exercise | Occasionally  | Occasionally | High Class   |
| Occasionally  | Regular Exercise | Non Alcoholic | Regular      | High Class   |
| Occasionally  | No Exercise      | Non Alcoholic | Occasionally | Poor         |
| Occasionally  | No Exercise      | Non Alcoholic | Regular      | Poor         |
| Occasionally  | Occasionally     | Non Alcoholic | Regular      | Poor         |
| Occasionally  | No Exercise      | Non Alcoholic | Occasionally | Middle Class |
| Occasionally  | No Exercise      | Non Alcoholic | Regular      | High Class   |
| Following     | No Exercise      | Occasionally  | Regular      | High Class   |
| Occasionally  | Occasionally     | Non Alcoholic | Regular      | Middle Class |
| Occasionally  | No Exercise      | Non Alcoholic | Occasionally | Middle Class |
| Occasionally  | Regular Exercise | Non Alcoholic | Regular      | Middle Class |
| Occasionally  | No Exercise      | Non Alcoholic | Regular      | High Class   |
| Not Following | No Exercise      | Non Alcoholic | Regular      | Poor         |
| Occasionally  | Regular Exercise | Non Alcoholic | Regular      | Middle Class |
| Not Following | No Exercise      | Non Alcoholic | Occasionally | Poor         |
| Not Following | No Exercise      | Occasionally  | Non Smoker   | Poor         |
| Not Following | No Exercise      | Non Alcoholic | Regular      | Poor         |
| Not Following | Occasionally     | Non Alcoholic | Occasionally | Poor         |
| Following     | No Exercise      | Non Alcoholic | Regular      | Poor         |



|               |                  |               |              |              |
|---------------|------------------|---------------|--------------|--------------|
| Occasionally  | Regular Exercise | Non Alcoholic | Occasionally | High Class   |
| Occasionally  | Regular Exercise | Non Alcoholic | Regular      | Middle Class |
| Occasionally  | No Exercise      | Non Alcoholic | Regular      | High Class   |
| Not Following | No Exercise      | Non Alcoholic | Occasionally | Middle Class |
| Occasionally  | Regular Exercise | Non Alcoholic | Regular      | High Class   |
| Following     | No Exercise      | Occasionally  | Regular      | Poor         |
| Not Following | Regular Exercise | Occasionally  | Regular      | Middle Class |
| Not Following | No Exercise      | Non Alcoholic | Occasionally | Poor         |
| Not Following | Regular Exercise | Non Alcoholic | Regular      | Middle Class |
| Not Following | Occasionally     | Non Alcoholic | Regular      | Poor         |
| Not Following | Regular Exercise | Occasionally  | Regular      | Poor         |
| Not Following | No Exercise      | Occasionally  | Regular      | Poor         |
| Occasionally  | Regular Exercise | Occasionally  | Non Smoker   | High Class   |
| Occasionally  | No Exercise      | Occasionally  | Regular      | High Class   |
| Not Following | Regular Exercise | Occasionally  | Regular      | High Class   |
| Occasionally  | Regular Exercise | Occasionally  | Occasionally | High Class   |
| Not Following | Regular Exercise | Non Alcoholic | Regular      | High Class   |
| Occasionally  | Occasionally     | Non Alcoholic | Occasionally | Middle Class |
| Not Following | Regular Exercise | Non Alcoholic | Regular      | Poor         |
| Occasionally  | Regular Exercise | Non Alcoholic | Regular      | High Class   |
| Not Following | No Exercise      | Non Alcoholic | Occasionally | High Class   |
| Occasionally  | No Exercise      | Non Alcoholic | Regular      | Middle Class |
| Not Following | No Exercise      | Non Alcoholic | Regular      | High Class   |
| Following     | Regular Exercise | Non Alcoholic | Regular      | High Class   |
| Occasionally  | Regular Exercise | Non Alcoholic | Occasionally | Poor         |
| Not Following | Regular Exercise | Non Alcoholic | Regular      | Poor         |
| Occasionally  | Regular Exercise | Non Alcoholic | Regular      | Middle Class |
| Occasionally  | Occasionally     | Non Alcoholic | Regular      | Middle Class |
| Not Following | Regular Exercise | Non Alcoholic | Regular      | Middle Class |
| Occasionally  | Regular Exercise | Non Alcoholic | Non Smoker   | Middle Class |
| Occasionally  | No Exercise      | Non Alcoholic | Regular      | Middle Class |
| Not Following | No Exercise      | Non Alcoholic | Regular      | High Class   |
| Following     | No Exercise      | Occasionally  | Occasionally | High Class   |
| Following     | Occasionally     | Non Alcoholic | Regular      | Middle Class |
| Occasionally  | No Exercise      | Non Alcoholic | Occasionally | Middle Class |
| Occasionally  | No Exercise      | Non Alcoholic | Regular      | High Class   |
| Occasionally  | Regular Exercise | Non Alcoholic | Regular      | Poor         |
| Occasionally  | No Exercise      | Non Alcoholic | Occasionally | Poor         |
| Occasionally  | No Exercise      | Non Alcoholic | Regular      | High Class   |
| Following     | No Exercise      | Non Alcoholic | Regular      | High Class   |
| Occasionally  | No Exercise      | Non Alcoholic | Regular      | Poor         |
| Occasionally  | Occasionally     | Non Alcoholic | Occasionally | Middle Class |
| Occasionally  | No Exercise      | Non Alcoholic | Regular      | Poor         |
| Following     | No Exercise      | Non Alcoholic | Regular      | Poor         |
| Following     | Occasionally     | Non Alcoholic | Regular      | Middle Class |
| Not Following | No Exercise      | Non Alcoholic | Non Smoker   | Poor         |
| Following     | No Exercise      | Occasionally  | Occasionally | Middle Class |

|               |                  |               |              |              |
|---------------|------------------|---------------|--------------|--------------|
| Following     | No Exercise      | Non Alcoholic | Regular      | Middle Class |
| Not Following | Regular Exercise | Non Alcoholic | Regular      | Poor         |
| Not Following | Regular Exercise | Non Alcoholic | Occasionally | Middle Class |
| Occasionally  | Occasionally     | Non Alcoholic | Regular      | Poor         |
| Occasionally  | Regular Exercise | Non Alcoholic | Occasionally | Poor         |
| Not Following | Regular Exercise | Non Alcoholic | Regular      | High Class   |
| Not Following | No Exercise      | Non Alcoholic | Regular      | Poor         |
| Occasionally  | Occasionally     | Non Alcoholic | Occasionally | High Class   |
| Not Following | Regular Exercise | Occasionally  | Regular      | High Class   |
| Not Following | No Exercise      | Non Alcoholic | Regular      | High Class   |
| Not Following | Regular Exercise | Non Alcoholic | Regular      | Middle Class |
| Not Following | No Exercise      | Non Alcoholic | Occasionally | Middle Class |
| Occasionally  | Regular Exercise | Non Alcoholic | Regular      | Middle Class |
| Not Following | No Exercise      | Non Alcoholic | Regular      | Middle Class |
| Occasionally  | Regular Exercise | Non Alcoholic | Regular      | Middle Class |
| Not Following | No Exercise      | Non Alcoholic | Regular      | Poor         |
| Not Following | No Exercise      | Non Alcoholic | Occasionally | Poor         |
| Occasionally  | No Exercise      | Non Alcoholic | Regular      | High Class   |
| Following     | Regular Exercise | Non Alcoholic | Regular      | Poor         |
| Following     | Regular Exercise | Non Alcoholic | Occasionally | Middle Class |
| Following     | Regular Exercise | Non Alcoholic | Non Smoker   | Middle Class |
| Not Following | Occasionally     | Occasionally  | Occasionally | Poor         |
| Occasionally  | No Exercise      | Non Alcoholic | Regular      | Poor         |
| Occasionally  | No Exercise      | Non Alcoholic | Regular      | High Class   |
| Following     | Occasionally     | Non Alcoholic | Occasionally | Poor         |
| Following     | No Exercise      | Non Alcoholic | Regular      | Poor         |
| Following     | No Exercise      | Non Alcoholic | Regular      | Poor         |
| Following     | Occasionally     | Non Alcoholic | Regular      | Middle Class |
| Occasionally  | No Exercise      | Non Alcoholic | Occasionally | High Class   |
| Occasionally  | Occasionally     | Non Alcoholic | Regular      | Poor         |
| Following     | No Exercise      | Non Alcoholic | Regular      | High Class   |
| Not Following | Regular Exercise | Alcoholic     | Regular      | Middle Class |
| Following     | Regular Exercise | Non Alcoholic | Non Smoker   | Poor         |
| Following     | Regular Exercise | Non Alcoholic | Occasionally | High Class   |
| Not Following | Regular Exercise | Occasionally  | Regular      | Poor         |
| Following     | No Exercise      | Non Alcoholic | Regular      | High Class   |
| Not Following | Regular Exercise | Non Alcoholic | Occasionally | Poor         |
| Following     | No Exercise      | Occasionally  | Regular      | High Class   |
| Occasionally  | Regular Exercise | Non Alcoholic | Occasionally | Poor         |
| Following     | No Exercise      | Non Alcoholic | Regular      | Middle Class |
| Occasionally  | Regular Exercise | Non Alcoholic | Regular      | Middle Class |
| Following     | No Exercise      | Non Alcoholic | Occasionally | Middle Class |
| Following     | Regular Exercise | Non Alcoholic | Regular      | Middle Class |
| Following     | No Exercise      | Non Alcoholic | Regular      | Middle Class |
| Following     | Regular Exercise | Non Alcoholic | Regular      | Poor         |
| Following     | No Exercise      | Non Alcoholic | Occasionally | High Class   |
| Occasionally  | No Exercise      | Non Alcoholic | Regular      | Middle Class |



|               |                  |               |              |              |
|---------------|------------------|---------------|--------------|--------------|
| Following     | Regular Exercise | Non Alcoholic | Regular      | Middle Class |
| Following     | No Exercise      | Non Alcoholic | Regular      | Middle Class |
| Occasionally  | No Exercise      | Alcoholic     | Occasionally | Poor         |
| Occasionally  | No Exercise      | Alcoholic     | Regular      | High Class   |
| Following     | Regular Exercise | Non Alcoholic | Regular      | High Class   |
| Following     | Regular Exercise | Non Alcoholic | Regular      | Middle Class |
| Not Following | Regular Exercise | Non Alcoholic | Regular      | Middle Class |
| Following     | Regular Exercise | Non Alcoholic | Occasionally | Middle Class |
| Not Following | No Exercise      | Occasionally  | Regular      | Poor         |
| Following     | No Exercise      | Alcoholic     | Regular      | Poor         |
| Following     | Regular Exercise | Non Alcoholic | Occasionally | Poor         |
| Following     | Regular Exercise | Occasionally  | Regular      | Poor         |
| Following     | Regular Exercise | Alcoholic     | Regular      | High Class   |
| Not Following | No Exercise      | Non Alcoholic | Regular      | High Class   |
| Not Following | Occasionally     | Occasionally  | Non Smoker   | High Class   |
| Not Following | No Exercise      | Alcoholic     | Regular      | Poor         |
| Not Following | Regular Exercise | Non Alcoholic | Regular      | High Class   |
| Not Following | Regular Exercise | Occasionally  | Regular      | Poor         |
| Not Following | Regular Exercise | Alcoholic     | Regular      | Middle Class |
| Not Following | Regular Exercise | Non Alcoholic | Occasionally | Middle Class |
| Not Following | Regular Exercise | Occasionally  | Regular      | Middle Class |
| Not Following | Regular Exercise | Alcoholic     | Regular      | Middle Class |
| Following     | No Exercise      | Non Alcoholic | Occasionally | Middle Class |
| Following     | Regular Exercise | Non Alcoholic | Regular      | Middle Class |
| Not Following | No Exercise      | Non Alcoholic | Occasionally | High Class   |
| Not Following | Regular Exercise | Non Alcoholic | Regular      | High Class   |
| Not Following | Regular Exercise | Non Alcoholic | Regular      | High Class   |
| Not Following | Regular Exercise | Non Alcoholic | Regular      | High Class   |
| Not Following | Regular Exercise | Alcoholic     | Occasionally | High Class   |
| Not Following | Regular Exercise | Non Alcoholic | Regular      | Poor         |
| Not Following | Regular Exercise | Occasionally  | Regular      | High Class   |
| Occasionally  | No Exercise      | Occasionally  | Regular      | Middle Class |
| Occasionally  | Regular Exercise | Non Alcoholic | Occasionally | Poor         |
| Occasionally  | Regular Exercise | Non Alcoholic | Non Smoker   | Poor         |
| Not Following | Regular Exercise | Non Alcoholic | Regular      | Poor         |
| Not Following | No Exercise      | Non Alcoholic | Regular      | Poor         |
| Not Following | Regular Exercise | Non Alcoholic | Regular      | Middle Class |
| Not Following | Regular Exercise | Non Alcoholic | Occasionally | Poor         |
| Occasionally  | Regular Exercise | Non Alcoholic | Regular      | High Class   |
| Occasionally  | Occasionally     | Non Alcoholic | Regular      | High Class   |
| Occasionally  | Regular Exercise | Non Alcoholic | Regular      | Middle Class |
| Occasionally  | No Exercise      | Alcoholic     | Occasionally | Middle Class |
| Occasionally  | Regular Exercise | Occasionally  | Regular      | Middle Class |
| Not Following | No Exercise      | Occasionally  | Regular      | Middle Class |
| Occasionally  | Regular Exercise | Non Alcoholic | Non Smoker   | Poor         |
| Occasionally  | No Exercise      | Occasionally  | Occasionally | Poor         |
| Occasionally  | Occasionally     | Occasionally  | Regular      | Poor         |
| Occasionally  | Regular Exercise | Non Alcoholic | Regular      | High Class   |

|               |                  |               |              |              |
|---------------|------------------|---------------|--------------|--------------|
| Not Following | Regular Exercise | Non Alcoholic | Regular      | High Class   |
| Not Following | Occasionally     | Non Alcoholic | Regular      | High Class   |
| Not Following | Regular Exercise | Non Alcoholic | Occasionally | High Class   |
| Not Following | Regular Exercise | Non Alcoholic | Regular      | Middle Class |
| Not Following | Regular Exercise | Occasionally  | Regular      | High Class   |
| Not Following | Regular Exercise | Non Alcoholic | Occasionally | Middle Class |
| Not Following | No Exercise      | Non Alcoholic | Regular      | High Class   |
| Not Following | Regular Exercise | Non Alcoholic | Occasionally | Middle Class |
| Not Following | Occasionally     | Non Alcoholic | Regular      | High Class   |
| Not Following | Regular Exercise | Non Alcoholic | Regular      | Poor         |
| Not Following | No Exercise      | Non Alcoholic | Occasionally | Poor         |
| Not Following | Regular Exercise | Non Alcoholic | Regular      | Middle Class |
| Not Following | Regular Exercise | Non Alcoholic | Regular      | Middle Class |
| Not Following | Occasionally     | Occasionally  | Regular      | Middle Class |
| Not Following | Regular Exercise | Non Alcoholic | Non Smoker   | Middle Class |
| Not Following | Regular Exercise | Alcoholic     | Regular      | High Class   |
| Not Following | Regular Exercise | Non Alcoholic | Regular      | High Class   |
| Not Following | No Exercise      | Non Alcoholic | Regular      | High Class   |
| Not Following | Regular Exercise | Non Alcoholic | Regular      | High Class   |
| Not Following | Occasionally     | Non Alcoholic | Occasionally | High Class   |
| Not Following | Regular Exercise | Non Alcoholic | Regular      | Middle Class |
| Occasionally  | Occasionally     | Alcoholic     | Occasionally | Poor         |
| Not Following | Occasionally     | Non Alcoholic | Occasionally | Middle Class |
| Not Following | No Exercise      | Occasionally  | Regular      | Middle Class |
| Following     | Regular Exercise | Occasionally  | Occasionally | High Class   |
| Following     | Regular Exercise | Occasionally  | Occasionally | Poor         |
| Following     | Regular Exercise | Non Alcoholic | Regular      | Middle Class |
| Not Following | Occasionally     | Occasionally  | Occasionally | High Class   |
| Occasionally  | Regular Exercise | Occasionally  | Regular      | Middle Class |
| Not Following | Occasionally     | Non Alcoholic | Regular      | High Class   |
| Not Following | No Exercise      | Non Alcoholic | Non Smoker   | Middle Class |
| Following     | Regular Exercise | Non Alcoholic | Non Smoker   | High Class   |
| Following     | Regular Exercise | Non Alcoholic | Occasionally | Middle Class |
| Following     | Regular Exercise | Non Alcoholic | Non Smoker   | High Class   |
| Following     | Regular Exercise | Non Alcoholic | Occasionally | Poor         |
| Following     | Regular Exercise | Occasionally  | Occasionally | Poor         |
| Occasionally  | No Exercise      | Non Alcoholic | Regular      | Poor         |
| Occasionally  | No Exercise      | Non Alcoholic | Regular      | Poor         |
| Occasionally  | No Exercise      | Non Alcoholic | Regular      | Middle Class |
| Following     | Occasionally     | Alcoholic     | Regular      | Middle Class |
| Following     | No Exercise      | Non Alcoholic | Regular      | High Class   |
| Occasionally  | Regular Exercise | Occasionally  | Regular      | High Class   |
| Occasionally  | Occasionally     | Alcoholic     | Regular      | High Class   |
| Occasionally  | Occasionally     | Occasionally  | Regular      | Middle Class |
| Occasionally  | Regular Exercise | Non Alcoholic | Occasionally | Middle Class |
| Following     | Occasionally     | Alcoholic     | Regular      | Middle Class |
| Occasionally  | Regular Exercise | Occasionally  | Regular      | High Class   |

|               |                  |               |              |              |
|---------------|------------------|---------------|--------------|--------------|
| Occasionally  | Regular Exercise | Non Alcoholic | Occasionally | High Class   |
| Occasionally  | Regular Exercise | Alcoholic     | Regular      | Poor         |
| Occasionally  | Regular Exercise | Non Alcoholic | Occasionally | Poor         |
| Occasionally  | Occasionally     | Occasionally  | Occasionally | Poor         |
| Occasionally  | No Exercise      | Non Alcoholic | Non Smoker   | High Class   |
| Occasionally  | Regular Exercise | Non Alcoholic | Occasionally | High Class   |
| Following     | Regular Exercise | Occasionally  | Regular      | High Class   |
| Following     | No Exercise      | Non Alcoholic | Regular      | Middle Class |
| Occasionally  | No Exercise      | Alcoholic     | Regular      | Middle Class |
| Following     | Regular Exercise | Non Alcoholic | Occasionally | Middle Class |
| Following     | Regular Exercise | Non Alcoholic | Non Smoker   | Middle Class |
| Following     | Regular Exercise | Non Alcoholic | Non Smoker   | Poor         |
| Occasionally  | No Exercise      | Alcoholic     | Regular      | Poor         |
| Following     | Regular Exercise | Non Alcoholic | Regular      | High Class   |
| Occasionally  | No Exercise      | Non Alcoholic | Occasionally | High Class   |
| Occasionally  | No Exercise      | Non Alcoholic | Regular      | High Class   |
| Occasionally  | Regular Exercise | Occasionally  | Regular      | Middle Class |
| Occasionally  | Regular Exercise | Non Alcoholic | Occasionally | Middle Class |
| Following     | Regular Exercise | Non Alcoholic | Non Smoker   | Middle Class |
| Occasionally  | No Exercise      | Non Alcoholic | Non Smoker   | Middle Class |
| Occasionally  | No Exercise      | Non Alcoholic | Non Smoker   | Middle Class |
| Occasionally  | Occasionally     | Alcoholic     | Regular      | Poor         |
| Following     | Occasionally     | Non Alcoholic | Non Smoker   | Poor         |
| Occasionally  | No Exercise      | Alcoholic     | Regular      | Poor         |
| Following     | Regular Exercise | Alcoholic     | Regular      | Poor         |
| Occasionally  | Occasionally     | Occasionally  | Occasionally | Poor         |
| Occasionally  | No Exercise      | Alcoholic     | Regular      | Middle Class |
| Not Following | Regular Exercise | Alcoholic     | Occasionally | Middle Class |
| Not Following | Regular Exercise | Non Alcoholic | Non Smoker   | Middle Class |
| Occasionally  | No Exercise      | Occasionally  | Non Smoker   | Middle Class |
| Occasionally  | No Exercise      | Alcoholic     | Regular      | Middle Class |
| Occasionally  | Regular Exercise | Occasionally  | Regular      | Middle Class |
| Not Following | No Exercise      | Occasionally  | Non Smoker   | High Class   |
| Not Following | No Exercise      | Non Alcoholic | Non Smoker   | High Class   |
| Not Following | No Exercise      | Alcoholic     | Occasionally | High Class   |
| Occasionally  | Occasionally     | Occasionally  | Occasionally | Poor         |
| Following     | Regular Exercise | Non Alcoholic | Occasionally | High Class   |
| Occasionally  | Regular Exercise | Alcoholic     | Regular      | Poor         |
| Occasionally  | Regular Exercise | Non Alcoholic | Non Smoker   | Poor         |
| Occasionally  | Regular Exercise | Non Alcoholic | Occasionally | Middle Class |
| Occasionally  | Regular Exercise | Occasionally  | Regular      | High Class   |
| Not Following | Occasionally     | Non Alcoholic | Occasionally | High Class   |
| Not Following | Regular Exercise | Non Alcoholic | Regular      | Middle Class |
| Following     | Regular Exercise | Non Alcoholic | Non Smoker   | High Class   |
| Not Following | Regular Exercise | Alcoholic     | Regular      | High Class   |
| Following     | Regular Exercise | Non Alcoholic | Non Smoker   | High Class   |
| Not Following | Regular Exercise | Non Alcoholic | Non Smoker   | Middle Class |

|               |                  |               |              |              |
|---------------|------------------|---------------|--------------|--------------|
| Occasionally  | Occasionally     | Occasionally  | Occasionally | High Class   |
| Occasionally  | Regular Exercise | Alcoholic     | Regular      | Poor         |
| Not Following | Regular Exercise | Occasionally  | Non Smoker   | High Class   |
| Occasionally  | Regular Exercise | Alcoholic     | Regular      | Poor         |
| Following     | Regular Exercise | Non Alcoholic | Regular      | Poor         |
| Following     | Regular Exercise | Non Alcoholic | Occasionally | High Class   |
| Following     | Regular Exercise | Alcoholic     | Regular      | Poor         |
| Following     | Regular Exercise | Non Alcoholic | Regular      | Poor         |
| Not Following | Regular Exercise | Non Alcoholic | Occasionally | High Class   |
| Following     | Regular Exercise | Occasionally  | Regular      | Middle Class |
| Not Following | Regular Exercise | Occasionally  | Regular      | High Class   |
| Not Following | Regular Exercise | Non Alcoholic | Regular      | Middle Class |
| Following     | Regular Exercise | Non Alcoholic | Regular      | Middle Class |
| Occasionally  | Occasionally     | Alcoholic     | Occasionally | High Class   |
| Occasionally  | Regular Exercise | Non Alcoholic | Non Smoker   | High Class   |
| Following     | Regular Exercise | Occasionally  | Regular      | Poor         |
| Following     | Regular Exercise | Non Alcoholic | Non Smoker   | Poor         |
| Following     | Occasionally     | Occasionally  | Occasionally | Poor         |
| Occasionally  | Regular Exercise | Occasionally  | Regular      | Middle Class |
| Occasionally  | Occasionally     | Alcoholic     | Occasionally | High Class   |
| Occasionally  | No Exercise      | Non Alcoholic | Non Smoker   | High Class   |
| Following     | Regular Exercise | Non Alcoholic | Regular      | High Class   |
| Not Following | No Exercise      | Alcoholic     | Occasionally | Poor         |
| Not Following | Occasionally     | Occasionally  | Regular      | Poor         |
| Occasionally  | Occasionally     | Non Alcoholic | Non Smoker   | Poor         |
| Not Following | Regular Exercise | Alcoholic     | Non Smoker   | High Class   |
| Not Following | Regular Exercise | Occasionally  | Non Smoker   | Poor         |
| Occasionally  | Occasionally     | Occasionally  | Occasionally | Poor         |
| Following     | Regular Exercise | Alcoholic     | Regular      | High Class   |
| Following     | Regular Exercise | Non Alcoholic | Occasionally | Middle Class |
| Occasionally  | No Exercise      | Alcoholic     | Non Smoker   | Middle Class |
| Following     | No Exercise      | Alcoholic     | Regular      | High Class   |
| Not Following | Occasionally     | Occasionally  | Occasionally | High Class   |
| Occasionally  | Occasionally     | Non Alcoholic | Regular      | Poor         |
| Occasionally  | Occasionally     | Non Alcoholic | Occasionally | Poor         |
| Following     | Regular Exercise | Alcoholic     | Regular      | Poor         |
| Following     | No Exercise      | Occasionally  | Non Smoker   | Middle Class |
| Following     | Regular Exercise | Alcoholic     | Occasionally | High Class   |
| Not Following | Occasionally     | Occasionally  | Regular      | High Class   |
| Occasionally  | No Exercise      | Non Alcoholic | Regular      | Middle Class |
| Occasionally  | Occasionally     | Occasionally  | Regular      | Middle Class |
| Following     | Regular Exercise | Alcoholic     | Regular      | Middle Class |
| Following     | No Exercise      | Alcoholic     | Non Smoker   | High Class   |
| Following     | Occasionally     | Occasionally  | Occasionally | Poor         |
| Following     | Occasionally     | Occasionally  | Non Smoker   | Middle Class |
| Occasionally  | Occasionally     | Occasionally  | Occasionally | Poor         |
| Following     | Occasionally     | Alcoholic     | Regular      | Poor         |

|               |                  |               |              |              |
|---------------|------------------|---------------|--------------|--------------|
| Following     | Regular Exercise | Non Alcoholic | Occasionally | Poor         |
| Occasionally  | Regular Exercise | Alcoholic     | Occasionally | Poor         |
| Occasionally  | Regular Exercise | Non Alcoholic | Non Smoker   | Poor         |
| Occasionally  | Regular Exercise | Alcoholic     | Occasionally | High Class   |
| Following     | Regular Exercise | Occasionally  | Regular      | Middle Class |
| Following     | Regular Exercise | Non Alcoholic | Non Smoker   | High Class   |
| Following     | Occasionally     | Alcoholic     | Occasionally | Middle Class |
| Occasionally  | Regular Exercise | Occasionally  | Non Smoker   | High Class   |
| Not Following | No Exercise      | Occasionally  | Regular      | Poor         |
| Following     | Occasionally     | Occasionally  | Occasionally | Middle Class |
| Not Following | Regular Exercise | Occasionally  | Non Smoker   | Poor         |
| Not Following | Regular Exercise | Occasionally  | Occasionally | Middle Class |
| Following     | Regular Exercise | Non Alcoholic | Non Smoker   | Poor         |
| Following     | Regular Exercise | Non Alcoholic | Occasionally | Poor         |
| Following     | Regular Exercise | Occasionally  | Occasionally | Poor         |
| Occasionally  | Occasionally     | Occasionally  | Non Smoker   | High Class   |
| Following     | Regular Exercise | Alcoholic     | Regular      | High Class   |
| Occasionally  | Regular Exercise | Occasionally  | Occasionally | High Class   |
| Not Following | Occasionally     | Alcoholic     | Regular      | High Class   |
| Following     | Occasionally     | Occasionally  | Occasionally | High Class   |
| Following     | Occasionally     | Non Alcoholic | Regular      | Middle Class |
| Following     | Regular Exercise | Alcoholic     | Occasionally | Poor         |
| Following     | Regular Exercise | Non Alcoholic | Non Smoker   | High Class   |
| Not Following | Regular Exercise | Occasionally  | Regular      | High Class   |
| Following     | Occasionally     | Occasionally  | Regular      | Middle Class |
| Following     | Occasionally     | Non Alcoholic | Occasionally | High Class   |
| Following     | Regular Exercise | Alcoholic     | Regular      | High Class   |
| Occasionally  | Occasionally     | Occasionally  | Occasionally | Poor         |
| Not Following | Regular Exercise | Alcoholic     | Regular      | Poor         |
| Occasionally  | No Exercise      | Occasionally  | Regular      | Middle Class |
| Following     | Occasionally     | Alcoholic     | Regular      | Middle Class |
| Not Following | Regular Exercise | Alcoholic     | Regular      | Middle Class |
| Occasionally  | No Exercise      | Non Alcoholic | Regular      | Middle Class |
| Occasionally  | Regular Exercise | Non Alcoholic | Regular      | Middle Class |
| Occasionally  | Regular Exercise | Non Alcoholic | Regular      | High Class   |
| Following     | No Exercise      | Alcoholic     | Occasionally | High Class   |
| Not Following | Occasionally     | Alcoholic     | Regular      | Middle Class |
| Following     | Regular Exercise | Non Alcoholic | Occasionally | Middle Class |
| Following     | Regular Exercise | Non Alcoholic | Non Smoker   | High Class   |
| Following     | Regular Exercise | Non Alcoholic | Non Smoker   | Poor         |
| Occasionally  | Regular Exercise | Occasionally  | Regular      | Poor         |
| Following     | Occasionally     | Occasionally  | Regular      | High Class   |
| Following     | Regular Exercise | Non Alcoholic | Non Smoker   | High Class   |
| Occasionally  | Occasionally     | Occasionally  | Occasionally | Poor         |
| Following     | Regular Exercise | Non Alcoholic | Non Smoker   | Middle Class |
| Not Following | No Exercise      | Alcoholic     | Non Smoker   | Poor         |
| Following     | Regular Exercise | Alcoholic     | Regular      | Poor         |



|               |                  |               |              |              |
|---------------|------------------|---------------|--------------|--------------|
| Not Following | Regular Exercise | Occasionally  | Regular      | Middle Class |
| Not Following | Regular Exercise | Occasionally  | Regular      | Poor         |
| Not Following | Occasionally     | Occasionally  | Occasionally | Middle Class |
| Following     | Regular Exercise | Alcoholic     | Regular      | Middle Class |
| Following     | No Exercise      | Occasionally  | Occasionally | Poor         |
| Following     | Regular Exercise | Occasionally  | Regular      | Middle Class |
| Following     | Regular Exercise | Occasionally  | Non Smoker   | Poor         |
| Following     | Occasionally     | Non Alcoholic | Non Smoker   | Poor         |
| Following     | Regular Exercise | Occasionally  | Occasionally | High Class   |
| Following     | Regular Exercise | Non Alcoholic | Regular      | Poor         |
| Occasionally  | Occasionally     | Alcoholic     | Regular      | High Class   |
| Not Following | No Exercise      | Non Alcoholic | Regular      | High Class   |
| Occasionally  | Occasionally     | Non Alcoholic | Non Smoker   | High Class   |
| Not Following | Regular Exercise | Occasionally  | Occasionally | Middle Class |
| Following     | Regular Exercise | Occasionally  | Regular      | Middle Class |
| Occasionally  | Occasionally     | Occasionally  | Regular      | Middle Class |
| Not Following | No Exercise      | Non Alcoholic | Non Smoker   | Middle Class |
| Occasionally  | Regular Exercise | Non Alcoholic | Occasionally | Middle Class |
| Following     | Regular Exercise | Non Alcoholic | Non Smoker   | Poor         |
| Occasionally  | Occasionally     | Occasionally  | Occasionally | Poor         |
| Occasionally  | Occasionally     | Occasionally  | Occasionally | High Class   |
| Following     | No Exercise      | Occasionally  | Regular      | Poor         |
| Not Following | No Exercise      | Alcoholic     | Regular      | Middle Class |
| Not Following | Regular Exercise | Occasionally  | Regular      | Middle Class |
| Following     | Regular Exercise | Non Alcoholic | Regular      | Poor         |
| Not Following | No Exercise      | Occasionally  | Occasionally | Poor         |
| Following     | Regular Exercise | Non Alcoholic | Non Smoker   | High Class   |
| Following     | Regular Exercise | Alcoholic     | Non Smoker   | Poor         |
| Not Following | Occasionally     | Alcoholic     | Regular      | Poor         |
| Not Following | Regular Exercise | Occasionally  | Non Smoker   | Poor         |
| Following     | Regular Exercise | Occasionally  | Non Smoker   | Middle Class |
| Following     | Regular Exercise | Non Alcoholic | Regular      | High Class   |
| Following     | Occasionally     | Occasionally  | Non Smoker   | Poor         |
| Not Following | No Exercise      | Alcoholic     | Occasionally | High Class   |
| Following     | Occasionally     | Alcoholic     | Regular      | Middle Class |
| Not Following | Regular Exercise | Alcoholic     | Regular      | Poor         |
| Following     | Regular Exercise | Non Alcoholic | Regular      | High Class   |
| Following     | No Exercise      | Non Alcoholic | Occasionally | Poor         |
| Occasionally  | No Exercise      | Non Alcoholic | Non Smoker   | High Class   |
| Occasionally  | Regular Exercise | Alcoholic     | Non Smoker   | Poor         |
| Not Following | Occasionally     | Occasionally  | Regular      | High Class   |
| Not Following | Occasionally     | Non Alcoholic | Regular      | Poor         |
| Occasionally  | Regular Exercise | Non Alcoholic | Regular      | Middle Class |
| Not Following | No Exercise      | Alcoholic     | Regular      | Middle Class |
| Occasionally  | Regular Exercise | Occasionally  | Occasionally | Middle Class |
| Occasionally  | Regular Exercise | Non Alcoholic | Non Smoker   | Middle Class |
| Following     | Regular Exercise | Non Alcoholic | Non Smoker   | Middle Class |

|               |                  |               |              |              |
|---------------|------------------|---------------|--------------|--------------|
| Occasionally  | No Exercise      | Occasionally  | Non Smoker   | Poor         |
| Occasionally  | Regular Exercise | Alcoholic     | Regular      | High Class   |
| Following     | Regular Exercise | Non Alcoholic | Occasionally | Middle Class |
| Following     | Occasionally     | Occasionally  | Occasionally | High Class   |
| Following     | Regular Exercise | Non Alcoholic | Occasionally | Poor         |
| Following     | No Exercise      | Alcoholic     | Occasionally | High Class   |
| Occasionally  | No Exercise      | Alcoholic     | Occasionally | High Class   |
| Occasionally  | No Exercise      | Alcoholic     | Regular      | High Class   |
| Not Following | Occasionally     | Non Alcoholic | Occasionally | Poor         |
| Occasionally  | Occasionally     | Alcoholic     | Regular      | High Class   |
| Not Following | No Exercise      | Alcoholic     | Regular      | Poor         |
| Following     | Occasionally     | Non Alcoholic | Regular      | Poor         |
| Not Following | Occasionally     | Alcoholic     | Regular      | High Class   |
| Not Following | Occasionally     | Non Alcoholic | Regular      | Poor         |
| Not Following | No Exercise      | Occasionally  | Regular      | Poor         |
| Following     | Occasionally     | Non Alcoholic | Regular      | Middle Class |
| Occasionally  | No Exercise      | Alcoholic     | Non Smoker   | High Class   |
| Occasionally  | Occasionally     | Alcoholic     | Regular      | Middle Class |
| Occasionally  | Occasionally     | Occasionally  | Occasionally | Poor         |
| Occasionally  | No Exercise      | Occasionally  | Regular      | Poor         |
| Not Following | Occasionally     | Non Alcoholic | Regular      | High Class   |
| Following     | Regular Exercise | Alcoholic     | Occasionally | High Class   |
| Following     | Regular Exercise | Occasionally  | Occasionally | High Class   |
| Following     | No Exercise      | Alcoholic     | Occasionally | High Class   |
| Following     | Occasionally     | Non Alcoholic | Occasionally | High Class   |
| Occasionally  | Occasionally     | Occasionally  | Occasionally | High Class   |
| Following     | Occasionally     | Occasionally  | Regular      | High Class   |
| Not Following | Occasionally     | Alcoholic     | Regular      | Poor         |
| Following     | Regular Exercise | Occasionally  | Occasionally | Poor         |
| Occasionally  | No Exercise      | Non Alcoholic | Non Smoker   | Poor         |
| Occasionally  | Regular Exercise | Non Alcoholic | Regular      | High Class   |
| Occasionally  | No Exercise      | Alcoholic     | Regular      | High Class   |
| Occasionally  | Occasionally     | Occasionally  | Occasionally | Poor         |
| Following     | Occasionally     | Occasionally  | Regular      | Poor         |
| Not Following | Occasionally     | Non Alcoholic | Regular      | High Class   |
| Following     | Occasionally     | Occasionally  | Regular      | Poor         |
| Not Following | Occasionally     | Occasionally  | Occasionally | High Class   |
| Not Following | Occasionally     | Alcoholic     | Occasionally | Poor         |
| Occasionally  | Occasionally     | Non Alcoholic | Non Smoker   | Poor         |
| Occasionally  | Regular Exercise | Occasionally  | Non Smoker   | High Class   |
| Not Following | Occasionally     | Occasionally  | Occasionally | Middle Class |
| Following     | Regular Exercise | Non Alcoholic | Non Smoker   | Poor         |
| Not Following | Regular Exercise | Alcoholic     | Regular      | High Class   |
| Not Following | Regular Exercise | Occasionally  | Occasionally | High Class   |
| Occasionally  | Occasionally     | Occasionally  | Non Smoker   | Poor         |
| Following     | Occasionally     | Non Alcoholic | Non Smoker   | High Class   |
| Not Following | Occasionally     | Non Alcoholic | Regular      | Poor         |

|               |                  |               |              |              |
|---------------|------------------|---------------|--------------|--------------|
| Following     | Occasionally     | Non Alcoholic | Non Smoker   | Poor         |
| Following     | Occasionally     | Non Alcoholic | Regular      | Poor         |
| Following     | Occasionally     | Alcoholic     | Regular      | Poor         |
| Following     | Regular Exercise | Alcoholic     | Regular      | Middle Class |
| Following     | Regular Exercise | Non Alcoholic | Non Smoker   | Middle Class |
| Following     | Regular Exercise | Non Alcoholic | Occasionally | Poor         |
| Following     | Occasionally     | Alcoholic     | Regular      | High Class   |
| Following     | Regular Exercise | Non Alcoholic | Non Smoker   | High Class   |
| Occasionally  | Occasionally     | Alcoholic     | Occasionally | Middle Class |
| Occasionally  | Occasionally     | Non Alcoholic | Non Smoker   | High Class   |
| Following     | Regular Exercise | Occasionally  | Regular      | Poor         |
| Occasionally  | Regular Exercise | Occasionally  | Occasionally | Poor         |
| Following     | Occasionally     | Occasionally  | Non Smoker   | Poor         |
| Occasionally  | Occasionally     | Occasionally  | Non Smoker   | Poor         |
| Following     | Regular Exercise | Non Alcoholic | Regular      | Poor         |
| Following     | No Exercise      | Occasionally  | Occasionally | High Class   |
| Not Following | Occasionally     | Non Alcoholic | Occasionally | Poor         |
| Not Following | Regular Exercise | Alcoholic     | Regular      | Poor         |
| Following     | Regular Exercise | Occasionally  | Regular      | Middle Class |
| Not Following | No Exercise      | Alcoholic     | Regular      | Middle Class |
| Following     | Regular Exercise | Non Alcoholic | Non Smoker   | High Class   |
| Following     | Regular Exercise | Alcoholic     | Occasionally | Poor         |
| Following     | Regular Exercise | Non Alcoholic | Regular      | Middle Class |
| Following     | Regular Exercise | Non Alcoholic | Non Smoker   | High Class   |
| Not Following | No Exercise      | Non Alcoholic | Occasionally | Poor         |
| Following     | Regular Exercise | Non Alcoholic | Occasionally | High Class   |
| Following     | No Exercise      | Non Alcoholic | Regular      | Middle Class |
| Following     | No Exercise      | Alcoholic     | Regular      | Middle Class |
| Occasionally  | Occasionally     | Occasionally  | Occasionally | Middle Class |
| Occasionally  | Occasionally     | Non Alcoholic | Occasionally | High Class   |
| Occasionally  | Regular Exercise | Non Alcoholic | Occasionally | Poor         |
| Not Following | No Exercise      | Occasionally  | Occasionally | High Class   |
| Occasionally  | Regular Exercise | Non Alcoholic | Non Smoker   | High Class   |
| Following     | Regular Exercise | Non Alcoholic | Non Smoker   | Middle Class |
| Following     | Occasionally     | Occasionally  | Regular      | High Class   |
| Not Following | No Exercise      | Non Alcoholic | Occasionally | High Class   |
| Occasionally  | No Exercise      | Alcoholic     | Non Smoker   | High Class   |
| Following     | Regular Exercise | Non Alcoholic | Occasionally | Middle Class |
| Following     | No Exercise      | Occasionally  | Regular      | High Class   |
| Following     | Regular Exercise | Non Alcoholic | Occasionally | Poor         |
| Following     | No Exercise      | Occasionally  | Regular      | Poor         |
| Following     | Regular Exercise | Non Alcoholic | Regular      | Poor         |
| Following     | No Exercise      | Non Alcoholic | Regular      | High Class   |
| Following     | Regular Exercise | Non Alcoholic | Regular      | Poor         |
| Occasionally  | Regular Exercise | Non Alcoholic | Occasionally | Poor         |
| Occasionally  | No Exercise      | Non Alcoholic | Regular      | High Class   |
| Following     | Regular Exercise | Non Alcoholic | Regular      | High Class   |

|              |                  |               |              |              |
|--------------|------------------|---------------|--------------|--------------|
| Following    | No Exercise      | Non Alcoholic | Occasionally | Middle Class |
| Occasionally | Regular Exercise | Non Alcoholic | Regular      | High Class   |
| Occasionally | No Exercise      | Non Alcoholic | Occasionally | High Class   |
| Occasionally | Regular Exercise | Non Alcoholic | Regular      | Poor         |
| Occasionally | Regular Exercise | Non Alcoholic | Regular      | High Class   |
| Occasionally | No Exercise      | Non Alcoholic | Occasionally | Middle Class |
| Occasionally | Regular Exercise | Non Alcoholic | Regular      | High Class   |
| Following    | No Exercise      | Non Alcoholic | Regular      | High Class   |
| Following    | Regular Exercise | Non Alcoholic | Regular      | Poor         |
| Following    | No Exercise      | Non Alcoholic | Occasionally | High Class   |
| Following    | Regular Exercise | Non Alcoholic | Regular      | High Class   |
| Following    | Regular Exercise | Non Alcoholic | Regular      | High Class   |
| Following    | Regular Exercise | Non Alcoholic | Occasionally | Middle Class |
| Following    | No Exercise      | Non Alcoholic | Regular      | Middle Class |
| Following    | Regular Exercise | Non Alcoholic | Regular      | Middle Class |
| Following    | Regular Exercise | Non Alcoholic | Occasionally | Middle Class |
| Following    | Regular Exercise | Occasionally  | Regular      | Middle Class |
| Following    | No Exercise      | Non Alcoholic | Occasionally | High Class   |
| Following    | Regular Exercise | Non Alcoholic | Regular      | High Class   |
| Following    | Regular Exercise | Non Alcoholic | Regular      | High Class   |
| Following    | No Exercise      | Non Alcoholic | Occasionally | High Class   |
| Following    | Regular Exercise | Non Alcoholic | Regular      | Poor         |
| Following    | Regular Exercise | Non Alcoholic | Regular      | High Class   |
| Following    | No Exercise      | Non Alcoholic | Regular      | Middle Class |
| Following    | Regular Exercise | Non Alcoholic | Occasionally | Poor         |
| Following    | No Exercise      | Non Alcoholic | Regular      | Poor         |
| Following    | Regular Exercise | Non Alcoholic | Regular      | Poor         |
| Following    | Regular Exercise | Non Alcoholic | Regular      | Poor         |
| Following    | Regular Exercise | Occasionally  | Regular      | Middle Class |
| Following    | No Exercise      | Non Alcoholic | Occasionally | Poor         |
| Occasionally | Regular Exercise | Non Alcoholic | Regular      | High Class   |
| Occasionally | No Exercise      | Non Alcoholic | Regular      | High Class   |
| Occasionally | Regular Exercise | Occasionally  | Occasionally | Middle Class |
| Following    | No Exercise      | Non Alcoholic | Non Smoker   | Middle Class |
| Following    | Regular Exercise | Non Alcoholic | Occasionally | Middle Class |
| Following    | Occasionally     | Non Alcoholic | Regular      | Middle Class |
| Occasionally | Regular Exercise | Non Alcoholic | Regular      | Middle Class |
| Following    | No Exercise      | Occasionally  | Occasionally | High Class   |
| Occasionally | Regular Exercise | Non Alcoholic | Regular      | Middle Class |
| Following    | Regular Exercise | Non Alcoholic | Regular      | Poor         |
| Occasionally | No Exercise      | Non Alcoholic | Regular      | High Class   |
| Following    | Occasionally     | Non Alcoholic | Occasionally | Poor         |
| Following    | Regular Exercise | Non Alcoholic | Non Smoker   | Middle Class |
| Following    | No Exercise      | Alcoholic     | Regular      | High Class   |
| Following    | Regular Exercise | Occasionally  | Regular      | Middle Class |
| Following    | No Exercise      | Non Alcoholic | Regular      | Poor         |
| Following    | Regular Exercise | Non Alcoholic | Occasionally | Poor         |

|              |                  |               |              |              |
|--------------|------------------|---------------|--------------|--------------|
| Following    | No Exercise      | Non Alcoholic | Regular      | Middle Class |
| Following    | Regular Exercise | Occasionally  | Regular      | Middle Class |
| Following    | No Exercise      | Non Alcoholic | Occasionally | Middle Class |
| Following    | Regular Exercise | Non Alcoholic | Regular      | High Class   |
| Following    | No Exercise      | Non Alcoholic | Occasionally | High Class   |
| Following    | Occasionally     | Non Alcoholic | Regular      | High Class   |
| Following    | Regular Exercise | Non Alcoholic | Regular      | Middle Class |
| Following    | No Exercise      | Non Alcoholic | Occasionally | Middle Class |
| Following    | No Exercise      | Non Alcoholic | Regular      | Middle Class |
| Following    | Regular Exercise | Occasionally  | Regular      | Middle Class |
| Following    | Regular Exercise | Non Alcoholic | Regular      | Poor         |
| Following    | No Exercise      | Non Alcoholic | Non Smoker   | Poor         |
| Following    | No Exercise      | Non Alcoholic | Regular      | Poor         |
| Following    | No Exercise      | Non Alcoholic | Regular      | High Class   |
| Following    | No Exercise      | Non Alcoholic | Regular      | High Class   |
| Following    | Regular Exercise | Non Alcoholic | Regular      | High Class   |
| Following    | No Exercise      | Non Alcoholic | Occasionally | High Class   |
| Following    | Regular Exercise | Non Alcoholic | Regular      | Middle Class |
| Following    | Occasionally     | Occasionally  | Regular      | High Class   |
| Following    | No Exercise      | Non Alcoholic | Occasionally | Middle Class |
| Following    | No Exercise      | Non Alcoholic | Non Smoker   | High Class   |
| Following    | No Exercise      | Non Alcoholic | Occasionally | Middle Class |
| Occasionally | Regular Exercise | Non Alcoholic | Regular      | High Class   |
| Following    | No Exercise      | Non Alcoholic | Regular      | Poor         |
| Following    | Regular Exercise | Non Alcoholic | Occasionally | Poor         |
| Following    | No Exercise      | Non Alcoholic | Regular      | Middle Class |
| Following    | Regular Exercise | Non Alcoholic | Regular      | Middle Class |
| Following    | No Exercise      | Alcoholic     | Regular      | Middle Class |
| Following    | Regular Exercise | Non Alcoholic | Occasionally | Middle Class |
| Following    | No Exercise      | Non Alcoholic | Regular      | High Class   |
| Following    | Occasionally     | Non Alcoholic | Regular      | High Class   |
| Occasionally | Regular Exercise | Non Alcoholic | Regular      | Poor         |
| Occasionally | Regular Exercise | Non Alcoholic | Regular      | Poor         |
| Following    | Regular Exercise | Non Alcoholic | Occasionally | Middle Class |
| Occasionally | Regular Exercise | Non Alcoholic | Regular      | Middle Class |
| Following    | Regular Exercise | Non Alcoholic | Regular      | Middle Class |
| Following    | No Exercise      | Non Alcoholic | Non Smoker   | Middle Class |
| Following    | Regular Exercise | Non Alcoholic | Regular      | Middle Class |
| Following    | Regular Exercise | Occasionally  | Occasionally | High Class   |
| Following    | Regular Exercise | Non Alcoholic | Regular      | Middle Class |
| Occasionally | Regular Exercise | Non Alcoholic | Regular      | High Class   |
| Occasionally | Regular Exercise | Non Alcoholic | Occasionally | High Class   |
| Occasionally | Regular Exercise | Non Alcoholic | Regular      | High Class   |
| Occasionally | Regular Exercise | Non Alcoholic | Regular      | High Class   |
| Occasionally | Regular Exercise | Non Alcoholic | Regular      | High Class   |
| Following    | No Exercise      | Alcoholic     | Non Smoker   | High Class   |
| Following    | No Exercise      | Non Alcoholic | Regular      | Poor         |

|               |                  |               |              |              |
|---------------|------------------|---------------|--------------|--------------|
| Following     | No Exercise      | Alcoholic     | Regular      | Poor         |
| Following     | Regular Exercise | Non Alcoholic | Regular      | Poor         |
| Following     | No Exercise      | Non Alcoholic | Regular      | Middle Class |
| Following     | Regular Exercise | Non Alcoholic | Occasionally | High Class   |
| Following     | Regular Exercise | Non Alcoholic | Regular      | Poor         |
| Following     | Regular Exercise | Non Alcoholic | Regular      | Poor         |
| Following     | No Exercise      | Non Alcoholic | Occasionally | Poor         |
| Following     | No Exercise      | Non Alcoholic | Regular      | Poor         |
| Following     | Regular Exercise | Alcoholic     | Occasionally | Poor         |
| Following     | No Exercise      | Non Alcoholic | Regular      | Poor         |
| Following     | No Exercise      | Non Alcoholic | Regular      | Poor         |
| Following     | Regular Exercise | Non Alcoholic | Occasionally | Poor         |
| Following     | Regular Exercise | Non Alcoholic | Regular      | Middle Class |
| Following     | No Exercise      | Non Alcoholic | Regular      | High Class   |
| Occasionally  | Regular Exercise | Non Alcoholic | Non Smoker   | Poor         |
| Following     | No Exercise      | Non Alcoholic | Occasionally | Middle Class |
| Following     | No Exercise      | Non Alcoholic | Regular      | Poor         |
| Following     | Regular Exercise | Non Alcoholic | Regular      | Poor         |
| Following     | No Exercise      | Non Alcoholic | Regular      | Poor         |
| Following     | Regular Exercise | Non Alcoholic | Regular      | High Class   |
| Following     | Regular Exercise | Occasionally  | Occasionally | High Class   |
| Following     | No Exercise      | Occasionally  | Regular      | High Class   |
| Following     | No Exercise      | Non Alcoholic | Regular      | Poor         |
| Following     | No Exercise      | Non Alcoholic | Occasionally | Poor         |
| Not Following | Regular Exercise | Non Alcoholic | Regular      | Middle Class |
| Following     | Regular Exercise | Non Alcoholic | Occasionally | Middle Class |
| Not Following | Regular Exercise | Non Alcoholic | Regular      | High Class   |
| Following     | No Exercise      | Non Alcoholic | Regular      | Poor         |
| Following     | Regular Exercise | Non Alcoholic | Occasionally | High Class   |
| Following     | No Exercise      | Occasionally  | Regular      | Poor         |
| Not Following | Regular Exercise | Non Alcoholic | Regular      | Middle Class |
| Not Following | No Exercise      | Non Alcoholic | Regular      | Middle Class |
| Not Following | Regular Exercise | Non Alcoholic | Occasionally | High Class   |
| Following     | Regular Exercise | Non Alcoholic | Regular      | Poor         |
| Not Following | Regular Exercise | Non Alcoholic | Regular      | Poor         |
| Not Following | Regular Exercise | Occasionally  | Regular      | Poor         |
| Following     | Regular Exercise | Non Alcoholic | Regular      | High Class   |
| Not Following | Regular Exercise | Non Alcoholic | Occasionally | High Class   |
| Not Following | No Exercise      | Non Alcoholic | Regular      | High Class   |
| Not Following | Regular Exercise | Non Alcoholic | Non Smoker   | High Class   |
| Occasionally  | Regular Exercise | Non Alcoholic | Occasionally | High Class   |
| Not Following | Regular Exercise | Occasionally  | Regular      | Poor         |
| Following     | Regular Exercise | Non Alcoholic | Non Smoker   | Middle Class |
| Occasionally  | Occasionally     | Non Alcoholic | Regular      | High Class   |
| Occasionally  | Regular Exercise | Non Alcoholic | Regular      | High Class   |
| Occasionally  | Regular Exercise | Non Alcoholic | Occasionally | High Class   |
| Occasionally  | Occasionally     | Occasionally  | Regular      | High Class   |

|               |                  |               |              |              |
|---------------|------------------|---------------|--------------|--------------|
| Following     | No Exercise      | Non Alcoholic | Regular      | High Class   |
| Following     | No Exercise      | Non Alcoholic | Regular      | High Class   |
| Occasionally  | Occasionally     | Non Alcoholic | Occasionally | High Class   |
| Occasionally  | Regular Exercise | Non Alcoholic | Regular      | High Class   |
| Not Following | No Exercise      | Non Alcoholic | Regular      | Middle Class |
| Not Following | Regular Exercise | Non Alcoholic | Regular      | Middle Class |
| Following     | Regular Exercise | Non Alcoholic | Regular      | Middle Class |
| Following     | Regular Exercise | Non Alcoholic | Occasionally | Poor         |
| Not Following | No Exercise      | Non Alcoholic | Regular      | Poor         |
| Following     | Regular Exercise | Occasionally  | Regular      | High Class   |
| Following     | No Exercise      | Non Alcoholic | Occasionally | Middle Class |
| Following     | Regular Exercise | Occasionally  | Regular      | High Class   |
| Not Following | No Exercise      | Non Alcoholic | Occasionally | Poor         |
| Not Following | Regular Exercise | Non Alcoholic | Regular      | Middle Class |
| Not Following | Regular Exercise | Non Alcoholic | Regular      | High Class   |
| Not Following | No Exercise      | Non Alcoholic | Occasionally | Poor         |
| Following     | Occasionally     | Non Alcoholic | Regular      | Middle Class |
| Not Following | Regular Exercise | Non Alcoholic | Regular      | High Class   |
| Following     | No Exercise      | Occasionally  | Regular      | Middle Class |
| Not Following | Regular Exercise | Non Alcoholic | Occasionally | Poor         |
| Following     | No Exercise      | Non Alcoholic | Non Smoker   | High Class   |
| Following     | Regular Exercise | Non Alcoholic | Regular      | Middle Class |
| Following     | No Exercise      | Occasionally  | Regular      | Poor         |
| Following     | Regular Exercise | Non Alcoholic | Regular      | High Class   |
| Following     | No Exercise      | Non Alcoholic | Occasionally | Middle Class |
| Following     | Regular Exercise | Non Alcoholic | Regular      | High Class   |
| Not Following | No Exercise      | Non Alcoholic | Regular      | Middle Class |
| Following     | No Exercise      | Non Alcoholic | Occasionally | Poor         |
| Following     | Regular Exercise | Non Alcoholic | Regular      | Poor         |
| Not Following | Occasionally     | Non Alcoholic | Occasionally | Poor         |
| Not Following | No Exercise      | Occasionally  | Regular      | Poor         |
| Occasionally  | Regular Exercise | Non Alcoholic | Regular      | High Class   |
| Occasionally  | Regular Exercise | Non Alcoholic | Occasionally | High Class   |
| Occasionally  | No Exercise      | Non Alcoholic | Regular      | Poor         |
| Not Following | No Exercise      | Non Alcoholic | Regular      | High Class   |
| Occasionally  | No Exercise      | Non Alcoholic | Regular      | High Class   |
| Occasionally  | No Exercise      | Non Alcoholic | Occasionally | Middle Class |
| Occasionally  | Regular Exercise | Non Alcoholic | Regular      | High Class   |
| Not Following | No Exercise      | Non Alcoholic | Regular      | Middle Class |
| Not Following | Regular Exercise | Occasionally  | Regular      | High Class   |
| Not Following | Occasionally     | Non Alcoholic | Regular      | Poor         |
| Following     | No Exercise      | Non Alcoholic | Occasionally | Poor         |
| Following     | No Exercise      | Non Alcoholic | Regular      | Poor         |
| Following     | No Exercise      | Occasionally  | Regular      | Poor         |
| Following     | Regular Exercise | Non Alcoholic | Occasionally | Poor         |
| Not Following | No Exercise      | Non Alcoholic | Non Smoker   | High Class   |
| Not Following | Regular Exercise | Non Alcoholic | Occasionally | High Class   |

|               |                  |               |              |              |
|---------------|------------------|---------------|--------------|--------------|
| Following     | No Exercise      | Non Alcoholic | Regular      | Poor         |
| Following     | Regular Exercise | Non Alcoholic | Regular      | Poor         |
| Not Following | No Exercise      | Non Alcoholic | Occasionally | High Class   |
| Occasionally  | Regular Exercise | Non Alcoholic | Regular      | Poor         |
| Not Following | No Exercise      | Non Alcoholic | Regular      | Middle Class |
| Not Following | Occasionally     | Occasionally  | Regular      | Middle Class |
| Not Following | Regular Exercise | Non Alcoholic | Occasionally | Middle Class |
| Occasionally  | Occasionally     | Non Alcoholic | Regular      | Poor         |
| Occasionally  | Regular Exercise | Non Alcoholic | Regular      | Poor         |
| Not Following | Regular Exercise | Non Alcoholic | Regular      | High Class   |
| Not Following | Occasionally     | Non Alcoholic | Regular      | Middle Class |
| Not Following | No Exercise      | Non Alcoholic | Occasionally | Poor         |
| Not Following | Regular Exercise | Non Alcoholic | Regular      | Poor         |
| Not Following | Regular Exercise | Non Alcoholic | Regular      | Middle Class |
| Occasionally  | Regular Exercise | Occasionally  | Occasionally | Middle Class |
| Not Following | No Exercise      | Non Alcoholic | Regular      | High Class   |
| Occasionally  | Regular Exercise | Non Alcoholic | Occasionally | High Class   |
| Following     | Regular Exercise | Non Alcoholic | Regular      | High Class   |
| Following     | Regular Exercise | Non Alcoholic | Regular      | Poor         |
| Not Following | Regular Exercise | Non Alcoholic | Occasionally | Poor         |
| Not Following | No Exercise      | Occasionally  | Non Smoker   | High Class   |
| Following     | Occasionally     | Non Alcoholic | Regular      | Middle Class |
| Occasionally  | No Exercise      | Non Alcoholic | Regular      | High Class   |
| Following     | Regular Exercise | Non Alcoholic | Non Smoker   | Middle Class |
| Occasionally  | No Exercise      | Occasionally  | Regular      | High Class   |
| Following     | Regular Exercise | Non Alcoholic | Regular      | High Class   |
| Following     | No Exercise      | Non Alcoholic | Regular      | High Class   |
| Occasionally  | Regular Exercise | Non Alcoholic | Regular      | High Class   |
| Occasionally  | No Exercise      | Non Alcoholic | Occasionally | High Class   |
| Following     | Occasionally     | Non Alcoholic | Regular      | Poor         |
| Occasionally  | Regular Exercise | Occasionally  | Regular      | High Class   |
| Occasionally  | No Exercise      | Non Alcoholic | Occasionally | High Class   |
| Following     | No Exercise      | Non Alcoholic | Regular      | High Class   |
| Occasionally  | Occasionally     | Non Alcoholic | Occasionally | High Class   |
| Not Following | Regular Exercise | Non Alcoholic | Regular      | High Class   |
| Not Following | No Exercise      | Occasionally  | Regular      | Middle Class |
| Following     | No Exercise      | Occasionally  | Occasionally | High Class   |
| Following     | No Exercise      | Non Alcoholic | Regular      | Middle Class |
| Not Following | No Exercise      | Non Alcoholic | Regular      | Poor         |
| Following     | Regular Exercise | Non Alcoholic | Regular      | High Class   |
| Following     | No Exercise      | Occasionally  | Occasionally | Middle Class |
| Not Following | Regular Exercise | Occasionally  | Regular      | Poor         |
| Following     | Regular Exercise | Non Alcoholic | Regular      | Poor         |
| Following     | Regular Exercise | Non Alcoholic | Regular      | Poor         |
| Not Following | No Exercise      | Alcoholic     | Regular      | Poor         |
| Following     | Occasionally     | Non Alcoholic | Occasionally | Poor         |
| Not Following | Regular Exercise | Non Alcoholic | Regular      | High Class   |



|               |                  |               |              |              |
|---------------|------------------|---------------|--------------|--------------|
| Following     | No Exercise      | Non Alcoholic | Regular      | Poor         |
| Not Following | Regular Exercise | Occasionally  | Occasionally | High Class   |
| Following     | Occasionally     | Non Alcoholic | Regular      | Poor         |
| Following     | Regular Exercise | Non Alcoholic | Occasionally | Poor         |
| Not Following | No Exercise      | Non Alcoholic | Regular      | High Class   |
| Following     | Regular Exercise | Non Alcoholic | Regular      | Middle Class |
| Not Following | No Exercise      | Non Alcoholic | Occasionally | Middle Class |
| Not Following | No Exercise      | Alcoholic     | Regular      | Middle Class |
| Following     | Regular Exercise | Non Alcoholic | Regular      | Poor         |
| Not Following | Regular Exercise | Non Alcoholic | Regular      | High Class   |
| Following     | Regular Exercise | Non Alcoholic | Occasionally | Middle Class |
| Not Following | Regular Exercise | Non Alcoholic | Regular      | Poor         |
| Not Following | Regular Exercise | Occasionally  | Regular      | Poor         |
| Following     | No Exercise      | Non Alcoholic | Regular      | High Class   |
| Following     | Regular Exercise | Non Alcoholic | Regular      | Poor         |
| Following     | Regular Exercise | Non Alcoholic | Occasionally | Poor         |
| Not Following | Regular Exercise | Non Alcoholic | Regular      | Middle Class |
| Following     | No Exercise      | Occasionally  | Regular      | Poor         |
| Following     | Regular Exercise | Non Alcoholic | Occasionally | Poor         |
| Not Following | Regular Exercise | Non Alcoholic | Regular      | High Class   |
| Not Following | Regular Exercise | Occasionally  | Occasionally | High Class   |
| Following     | Regular Exercise | Non Alcoholic | Regular      | Poor         |
| Following     | No Exercise      | Non Alcoholic | Regular      | Poor         |
| Not Following | No Exercise      | Alcoholic     | Occasionally | Poor         |
| Not Following | No Exercise      | Non Alcoholic | Regular      | Poor         |
| Following     | Regular Exercise | Non Alcoholic | Regular      | Poor         |
| Not Following | No Exercise      | Non Alcoholic | Non Smoker   | High Class   |
| Not Following | No Exercise      | Occasionally  | Occasionally | High Class   |
| Not Following | No Exercise      | Non Alcoholic | Regular      | High Class   |
| Not Following | Regular Exercise | Non Alcoholic | Regular      | High Class   |
| Not Following | No Exercise      | Non Alcoholic | Regular      | High Class   |
| Following     | Regular Exercise | Non Alcoholic | Regular      | High Class   |
| Not Following | No Exercise      | Occasionally  | Occasionally | Middle Class |
| Following     | Regular Exercise | Non Alcoholic | Regular      | Middle Class |
| Not Following | Regular Exercise | Non Alcoholic | Regular      | Middle Class |
| Not Following | Regular Exercise | Non Alcoholic | Occasionally | Middle Class |
| Not Following | Regular Exercise | Non Alcoholic | Regular      | High Class   |
| Following     | No Exercise      | Non Alcoholic | Occasionally | High Class   |
| Not Following | Regular Exercise | Non Alcoholic | Regular      | High Class   |
| Following     | No Exercise      | Alcoholic     | Regular      | High Class   |
| Not Following | No Exercise      | Non Alcoholic | Occasionally | High Class   |
| Following     | Regular Exercise | Non Alcoholic | Regular      | Middle Class |
| Following     | Occasionally     | Occasionally  | Regular      | Poor         |
| Following     | Occasionally     | Non Alcoholic | Regular      | Middle Class |
| Following     | No Exercise      | Non Alcoholic | Occasionally | Middle Class |
| Not Following | Occasionally     | Non Alcoholic | Regular      | High Class   |
| Following     | No Exercise      | Non Alcoholic | Regular      | Poor         |

|               |                  |               |              |              |
|---------------|------------------|---------------|--------------|--------------|
| Following     | No Exercise      | Non Alcoholic | Regular      | Middle Class |
| Following     | No Exercise      | Non Alcoholic | Non Smoker   | High Class   |
| Following     | Regular Exercise | Non Alcoholic | Occasionally | Middle Class |
| Occasionally  | Regular Exercise | Non Alcoholic | Regular      | High Class   |
| Occasionally  | No Exercise      | Occasionally  | Non Smoker   | Middle Class |
| Occasionally  | Regular Exercise | Occasionally  | Occasionally | High Class   |
| Occasionally  | Regular Exercise | Non Alcoholic | Regular      | Middle Class |
| Occasionally  | Occasionally     | Non Alcoholic | Occasionally | High Class   |
| Following     | Regular Exercise | Non Alcoholic | Regular      | Poor         |
| Occasionally  | No Exercise      | Non Alcoholic | Regular      | Poor         |
| Following     | No Exercise      | Non Alcoholic | Occasionally | Poor         |
| Not Following | No Exercise      | Non Alcoholic | Regular      | Poor         |
| Following     | Regular Exercise | Non Alcoholic | Regular      | Middle Class |
| Not Following | Regular Exercise | Non Alcoholic | Regular      | Middle Class |
| Following     | No Exercise      | Occasionally  | Occasionally | High Class   |
| Not Following | Regular Exercise | Non Alcoholic | Regular      | High Class   |
| Following     | Occasionally     | Non Alcoholic | Regular      | High Class   |
| Following     | Regular Exercise | Non Alcoholic | Regular      | Middle Class |
| Occasionally  | No Exercise      | Non Alcoholic | Regular      | Middle Class |
| Occasionally  | Regular Exercise | Non Alcoholic | Occasionally | Middle Class |
| Not Following | Occasionally     | Non Alcoholic | Regular      | High Class   |
| Occasionally  | Regular Exercise | Non Alcoholic | Regular      | High Class   |
| Not Following | No Exercise      | Non Alcoholic | Occasionally | Poor         |
| Not Following | Occasionally     | Non Alcoholic | Regular      | Poor         |
| Not Following | No Exercise      | Non Alcoholic | Occasionally | Poor         |
| Occasionally  | Occasionally     | Occasionally  | Regular      | High Class   |
| Not Following | No Exercise      | Occasionally  | Regular      | High Class   |
| Not Following | Occasionally     | Non Alcoholic | Occasionally | High Class   |
| Not Following | No Exercise      | Non Alcoholic | Regular      | Middle Class |
| Occasionally  | No Exercise      | Non Alcoholic | Regular      | Middle Class |
| Occasionally  | Regular Exercise | Non Alcoholic | Regular      | Middle Class |
| Occasionally  | No Exercise      | Occasionally  | Occasionally | Middle Class |
| Not Following | No Exercise      | Non Alcoholic | Regular      | Poor         |
| Not Following | Regular Exercise | Non Alcoholic | Regular      | Poor         |
| Following     | No Exercise      | Non Alcoholic | Regular      | High Class   |
| Following     | No Exercise      | Non Alcoholic | Regular      | High Class   |
| Not Following | No Exercise      | Non Alcoholic | Occasionally | High Class   |
| Following     | No Exercise      | Non Alcoholic | Regular      | Middle Class |
| Not Following | No Exercise      | Occasionally  | Regular      | Middle Class |
| Not Following | Regular Exercise | Non Alcoholic | Occasionally | Middle Class |
| Not Following | Regular Exercise | Non Alcoholic | Regular      | Middle Class |
| Following     | Regular Exercise | Occasionally  | Occasionally | Middle Class |
| Occasionally  | Occasionally     | Non Alcoholic | Occasionally | Poor         |
| Occasionally  | No Exercise      | Occasionally  | Non Smoker   | Poor         |
| Following     | Regular Exercise | Non Alcoholic | Occasionally | Poor         |
| Occasionally  | Regular Exercise | Occasionally  | Occasionally | Middle Class |
| Occasionally  | No Exercise      | Occasionally  | Regular      | Middle Class |

|               |                  |               |              |              |
|---------------|------------------|---------------|--------------|--------------|
| Following     | No Exercise      | Non Alcoholic | Regular      | High Class   |
| Following     | Regular Exercise | Non Alcoholic | Regular      | Poor         |
| Occasionally  | No Exercise      | Non Alcoholic | Regular      | Poor         |
| Not Following | Regular Exercise | Occasionally  | Occasionally | Poor         |
| Not Following | No Exercise      | Occasionally  | Regular      | High Class   |
| Following     | Regular Exercise | Alcoholic     | Regular      | Middle Class |
| Not Following | No Exercise      | Occasionally  | Occasionally | Middle Class |
| Following     | No Exercise      | Occasionally  | Non Smoker   | High Class   |
| Not Following | Occasionally     | Alcoholic     | Regular      | Poor         |
| Not Following | No Exercise      | Alcoholic     | Non Smoker   | High Class   |
| Occasionally  | Regular Exercise | Non Alcoholic | Non Smoker   | Poor         |
| Following     | Regular Exercise | Non Alcoholic | Non Smoker   | Poor         |
| Occasionally  | Regular Exercise | Occasionally  | Regular      | Poor         |
| Following     | No Exercise      | Alcoholic     | Occasionally | High Class   |
| Not Following | Regular Exercise | Alcoholic     | Regular      | Poor         |
| Following     | Occasionally     | Non Alcoholic | Regular      | Poor         |
| Occasionally  | No Exercise      | Occasionally  | Occasionally | Middle Class |
| Not Following | No Exercise      | Occasionally  | Occasionally | High Class   |
| Not Following | No Exercise      | Non Alcoholic | Non Smoker   | Poor         |
| Not Following | No Exercise      | Alcoholic     | Regular      | High Class   |
| Occasionally  | Occasionally     | Occasionally  | Occasionally | High Class   |
| Not Following | No Exercise      | Non Alcoholic | Non Smoker   | High Class   |
| Following     | No Exercise      | Non Alcoholic | Non Smoker   | Poor         |
| Not Following | No Exercise      | Non Alcoholic | Regular      | Poor         |
| Not Following | Occasionally     | Occasionally  | Occasionally | Middle Class |
| Following     | Regular Exercise | Non Alcoholic | Non Smoker   | High Class   |
| Not Following | Occasionally     | Alcoholic     | Regular      | High Class   |
| Not Following | No Exercise      | Occasionally  | Regular      | Middle Class |
| Not Following | Regular Exercise | Occasionally  | Regular      | Middle Class |
| Following     | No Exercise      | Non Alcoholic | Occasionally | High Class   |
| Following     | No Exercise      | Alcoholic     | Regular      | Poor         |
| Following     | No Exercise      | Alcoholic     | Occasionally | Poor         |
| Following     | Regular Exercise | Non Alcoholic | Occasionally | High Class   |
| Occasionally  | Occasionally     | Non Alcoholic | Occasionally | High Class   |
| Occasionally  | No Exercise      | Occasionally  | Non Smoker   | Poor         |
| Not Following | Occasionally     | Occasionally  | Occasionally | High Class   |
| Not Following | No Exercise      | Alcoholic     | Regular      | High Class   |
| Occasionally  | No Exercise      | Non Alcoholic | Regular      | High Class   |
| Not Following | No Exercise      | Non Alcoholic | Non Smoker   | Middle Class |
| Not Following | No Exercise      | Occasionally  | Occasionally | Poor         |
| Occasionally  | No Exercise      | Non Alcoholic | Occasionally | Poor         |
| Occasionally  | Occasionally     | Non Alcoholic | Non Smoker   | Middle Class |
| Following     | Regular Exercise | Non Alcoholic | Regular      | Middle Class |
| Following     | No Exercise      | Non Alcoholic | Non Smoker   | Middle Class |
| Occasionally  | Occasionally     | Non Alcoholic | Non Smoker   | High Class   |
| Not Following | No Exercise      | Non Alcoholic | Non Smoker   | Middle Class |
| Following     | No Exercise      | Alcoholic     | Non Smoker   | Middle Class |

|               |                  |               |              |              |
|---------------|------------------|---------------|--------------|--------------|
| Not Following | No Exercise      | Non Alcoholic | Non Smoker   | High Class   |
| Following     | No Exercise      | Non Alcoholic | Non Smoker   | Poor         |
| Not Following | No Exercise      | Alcoholic     | Regular      | Poor         |
| Following     | No Exercise      | Non Alcoholic | Occasionally | Poor         |
| Not Following | No Exercise      | Occasionally  | Occasionally | Poor         |
| Not Following | No Exercise      | Non Alcoholic | Regular      | Middle Class |
| Following     | Regular Exercise | Alcoholic     | Regular      | Poor         |
| Not Following | Regular Exercise | Non Alcoholic | Occasionally | High Class   |
| Following     | Occasionally     | Non Alcoholic | Non Smoker   | High Class   |
| Occasionally  | Occasionally     | Occasionally  | Occasionally | Middle Class |
| Following     | No Exercise      | Alcoholic     | Regular      | Poor         |
| Occasionally  | No Exercise      | Occasionally  | Regular      | High Class   |
| Not Following | No Exercise      | Non Alcoholic | Regular      | Poor         |
| Not Following | Regular Exercise | Occasionally  | Occasionally | Middle Class |
| Following     | Regular Exercise | Non Alcoholic | Non Smoker   | High Class   |
| Not Following | Regular Exercise | Alcoholic     | Non Smoker   | Poor         |
| Following     | Regular Exercise | Alcoholic     | Regular      | High Class   |
| Following     | Occasionally     | Non Alcoholic | Non Smoker   | Poor         |
| Following     | Occasionally     | Occasionally  | Occasionally | Middle Class |
| Following     | Regular Exercise | Non Alcoholic | Non Smoker   | Poor         |
| Occasionally  | Regular Exercise | Non Alcoholic | Regular      | High Class   |
| Occasionally  | Regular Exercise | Alcoholic     | Regular      | High Class   |
| Occasionally  | No Exercise      | Occasionally  | Occasionally | High Class   |
| Occasionally  | Regular Exercise | Alcoholic     | Non Smoker   | Poor         |
| Occasionally  | Occasionally     | Non Alcoholic | Non Smoker   | Poor         |
| Occasionally  | No Exercise      | Non Alcoholic | Regular      | Poor         |
| Occasionally  | Regular Exercise | Alcoholic     | Occasionally | Poor         |
| Occasionally  | Occasionally     | Non Alcoholic | Non Smoker   | Middle Class |
| Occasionally  | Regular Exercise | Non Alcoholic | Regular      | High Class   |
| Occasionally  | Occasionally     | Alcoholic     | Occasionally | Poor         |
| Occasionally  | Regular Exercise | Occasionally  | Occasionally | Poor         |
| Occasionally  | Regular Exercise | Alcoholic     | Non Smoker   | High Class   |
| Occasionally  | Regular Exercise | Alcoholic     | Regular      | Poor         |
| Occasionally  | Regular Exercise | Occasionally  | Non Smoker   | Poor         |
| Occasionally  | No Exercise      | Alcoholic     | Occasionally | Poor         |
| Occasionally  | No Exercise      | Alcoholic     | Occasionally | High Class   |
| Occasionally  | Regular Exercise | Occasionally  | Non Smoker   | Poor         |
| Not Following | No Exercise      | Non Alcoholic | Regular      | Middle Class |
| Occasionally  | Regular Exercise | Non Alcoholic | Regular      | High Class   |
| Occasionally  | Occasionally     | Alcoholic     | Regular      | Middle Class |
| Occasionally  | Occasionally     | Alcoholic     | Non Smoker   | Middle Class |
| Occasionally  | No Exercise      | Occasionally  | Regular      | Middle Class |
| Following     | No Exercise      | Alcoholic     | Regular      | Middle Class |
| Following     | Occasionally     | Non Alcoholic | Regular      | Poor         |
| Not Following | Occasionally     | Alcoholic     | Non Smoker   | High Class   |
| Following     | Regular Exercise | Alcoholic     | Non Smoker   | High Class   |
| Not Following | Regular Exercise | Non Alcoholic | Regular      | High Class   |

|               |                  |               |              |              |
|---------------|------------------|---------------|--------------|--------------|
| Not Following | Occasionally     | Alcoholic     | Non Smoker   | Middle Class |
| Occasionally  | No Exercise      | Alcoholic     | Regular      | Middle Class |
| Not Following | No Exercise      | Alcoholic     | Regular      | Poor         |
| Following     | No Exercise      | Non Alcoholic | Regular      | High Class   |
| Following     | Regular Exercise | Occasionally  | Regular      | High Class   |
| Not Following | Occasionally     | Occasionally  | Non Smoker   | Middle Class |
| Occasionally  | Occasionally     | Non Alcoholic | Occasionally | Middle Class |
| Following     | No Exercise      | Occasionally  | Occasionally | Middle Class |
| Occasionally  | No Exercise      | Alcoholic     | Occasionally | High Class   |
| Following     | No Exercise      | Non Alcoholic | Occasionally | High Class   |
| Occasionally  | Regular Exercise | Non Alcoholic | Regular      | High Class   |
| Occasionally  | No Exercise      | Alcoholic     | Occasionally | Poor         |
| Occasionally  | Occasionally     | Non Alcoholic | Regular      | Poor         |
| Not Following | Occasionally     | Non Alcoholic | Regular      | Middle Class |
| Following     | Regular Exercise | Occasionally  | Regular      | Poor         |
| Not Following | No Exercise      | Non Alcoholic | Occasionally | High Class   |
| Following     | No Exercise      | Non Alcoholic | Regular      | Poor         |
| Following     | Regular Exercise | Non Alcoholic | Regular      | High Class   |
| Following     | No Exercise      | Non Alcoholic | Regular      | Poor         |
| Following     | No Exercise      | Occasionally  | Regular      | Middle Class |
| Not Following | No Exercise      | Non Alcoholic | Occasionally | Middle Class |
| Following     | Regular Exercise | Non Alcoholic | Regular      | High Class   |
| Not Following | Occasionally     | Non Alcoholic | Occasionally | Middle Class |
| Following     | Regular Exercise | Non Alcoholic | Regular      | Poor         |
| Following     | No Exercise      | Non Alcoholic | Occasionally | Poor         |
| Following     | Regular Exercise | Non Alcoholic | Regular      | High Class   |
| Occasionally  | Regular Exercise | Alcoholic     | Regular      | Middle Class |
| Occasionally  | Occasionally     | Non Alcoholic | Regular      | High Class   |
| Occasionally  | Regular Exercise | Non Alcoholic | Occasionally | Middle Class |
| Occasionally  | Regular Exercise | Non Alcoholic | Regular      | Middle Class |
| Not Following | No Exercise      | Occasionally  | Regular      | High Class   |
| Occasionally  | No Exercise      | Non Alcoholic | Regular      | Poor         |
| Not Following | No Exercise      | Non Alcoholic | Regular      | Middle Class |
| Occasionally  | No Exercise      | Non Alcoholic | Regular      | Middle Class |
| Occasionally  | No Exercise      | Non Alcoholic | Regular      | High Class   |
| Occasionally  | No Exercise      | Occasionally  | Occasionally | Poor         |
| Following     | Regular Exercise | Alcoholic     | Regular      | Middle Class |
| Following     | Regular Exercise | Alcoholic     | Regular      | Middle Class |
| Following     | Regular Exercise | Non Alcoholic | Non Smoker   | Middle Class |
| Following     | No Exercise      | Non Alcoholic | Regular      | High Class   |
| Following     | Regular Exercise | Occasionally  | Occasionally | High Class   |
| Following     | Occasionally     | Non Alcoholic | Regular      | High Class   |
| Following     | No Exercise      | Non Alcoholic | Regular      | High Class   |
| Following     | No Exercise      | Non Alcoholic | Occasionally | Poor         |
| Following     | Occasionally     | Non Alcoholic | Regular      | Poor         |
| Following     | No Exercise      | Non Alcoholic | Regular      | High Class   |
| Following     | No Exercise      | Non Alcoholic | Regular      | Poor         |

|               |                  |               |              |              |
|---------------|------------------|---------------|--------------|--------------|
| Following     | No Exercise      | Non Alcoholic | Regular      | Poor         |
| Following     | No Exercise      | Non Alcoholic | Regular      | Poor         |
| Following     | Regular Exercise | Non Alcoholic | Regular      | Poor         |
| Occasionally  | Regular Exercise | Alcoholic     | Regular      | Poor         |
| Occasionally  | Regular Exercise | Occasionally  | Occasionally | Poor         |
| Not Following | No Exercise      | Non Alcoholic | Regular      | Middle Class |
| Occasionally  | No Exercise      | Non Alcoholic | Non Smoker   | High Class   |
| Not Following | Regular Exercise | Non Alcoholic | Occasionally | Poor         |
| Not Following | Regular Exercise | Alcoholic     | Regular      | Middle Class |
| Following     | Regular Exercise | Non Alcoholic | Occasionally | Poor         |
| Following     | No Exercise      | Non Alcoholic | Regular      | Poor         |
| Not Following | Regular Exercise | Occasionally  | Regular      | High Class   |
| Following     | Regular Exercise | Non Alcoholic | Regular      | Poor         |
| Following     | Occasionally     | Occasionally  | Regular      | Poor         |
| Following     | Regular Exercise | Non Alcoholic | Regular      | Middle Class |
| Following     | Regular Exercise | Non Alcoholic | Occasionally | Middle Class |
| Following     | No Exercise      | Non Alcoholic | Regular      | High Class   |
| Following     | Regular Exercise | Non Alcoholic | Occasionally | High Class   |
| Following     | No Exercise      | Occasionally  | Regular      | High Class   |
| Following     | No Exercise      | Non Alcoholic | Regular      | High Class   |
| Occasionally  | No Exercise      | Occasionally  | Regular      | Middle Class |
| Occasionally  | Regular Exercise | Non Alcoholic | Regular      | Poor         |
| Occasionally  | No Exercise      | Non Alcoholic | Regular      | High Class   |
| Occasionally  | No Exercise      | Non Alcoholic | Occasionally | High Class   |
| Occasionally  | Regular Exercise | Non Alcoholic | Regular      | High Class   |
| Occasionally  | Regular Exercise | Non Alcoholic | Regular      | High Class   |
| Occasionally  | No Exercise      | Non Alcoholic | Regular      | Poor         |
| Occasionally  | Occasionally     | Non Alcoholic | Occasionally | High Class   |
| Following     | No Exercise      | Non Alcoholic | Regular      | Poor         |
| Following     | Regular Exercise | Non Alcoholic | Regular      | High Class   |
| Following     | Regular Exercise | Non Alcoholic | Regular      | High Class   |
| Following     | No Exercise      | Non Alcoholic | Regular      | Poor         |
| Following     | Occasionally     | Non Alcoholic | Occasionally | Middle Class |
| Not Following | Regular Exercise | Alcoholic     | Regular      | High Class   |
| Following     | Regular Exercise | Non Alcoholic | Occasionally | High Class   |
| Following     | Regular Exercise | Non Alcoholic | Occasionally | Middle Class |
| Following     | Regular Exercise | Non Alcoholic | Regular      | High Class   |
| Following     | No Exercise      | Non Alcoholic | Occasionally | Poor         |
| Following     | Regular Exercise | Non Alcoholic | Regular      | Poor         |
| Not Following | Regular Exercise | Occasionally  | Regular      | Poor         |
| Not Following | Regular Exercise | Non Alcoholic | Occasionally | Poor         |
| Not Following | Regular Exercise | Non Alcoholic | Regular      | High Class   |
| Following     | No Exercise      | Non Alcoholic | Regular      | High Class   |
| Not Following | No Exercise      | Non Alcoholic | Occasionally | Middle Class |
| Not Following | Regular Exercise | Non Alcoholic | Regular      | High Class   |
| Not Following | No Exercise      | Non Alcoholic | Occasionally | High Class   |
| Following     | No Exercise      | Non Alcoholic | Regular      | Poor         |

|               |                  |               |              |              |
|---------------|------------------|---------------|--------------|--------------|
| Not Following | Regular Exercise | Non Alcoholic | Regular      | High Class   |
| Following     | No Exercise      | Non Alcoholic | Occasionally | Middle Class |
| Following     | No Exercise      | Non Alcoholic | Regular      | High Class   |
| Following     | Regular Exercise | Non Alcoholic | Regular      | High Class   |
| Not Following | Regular Exercise | Non Alcoholic | Regular      | Poor         |
| Following     | Regular Exercise | Non Alcoholic | Occasionally | High Class   |
| Not Following | Regular Exercise | Non Alcoholic | Regular      | High Class   |
| Following     | Regular Exercise | Non Alcoholic | Regular      | High Class   |
| Following     | No Exercise      | Non Alcoholic | Non Smoker   | High Class   |
| Not Following | Occasionally     | Non Alcoholic | Regular      | High Class   |
| Following     | No Exercise      | Non Alcoholic | Occasionally | Middle Class |
| Not Following | Occasionally     | Non Alcoholic | Regular      | Middle Class |
| Occasionally  | No Exercise      | Non Alcoholic | Non Smoker   | Middle Class |
| Not Following | Regular Exercise | Non Alcoholic | Occasionally | Middle Class |
| Not Following | No Exercise      | Non Alcoholic | Regular      | Middle Class |
| Not Following | Regular Exercise | Non Alcoholic | Occasionally | Middle Class |
| Occasionally  | No Exercise      | Alcoholic     | Regular      | Poor         |
| Following     | Regular Exercise | Non Alcoholic | Regular      | Poor         |
| Not Following | No Exercise      | Non Alcoholic | Occasionally | Poor         |
| Not Following | Occasionally     | Non Alcoholic | Regular      | Poor         |
| Not Following | No Exercise      | Non Alcoholic | Regular      | High Class   |
| Not Following | No Exercise      | Non Alcoholic | Regular      | High Class   |
| Not Following | Regular Exercise | Non Alcoholic | Occasionally | High Class   |
| Following     | Regular Exercise | Non Alcoholic | Regular      | Poor         |
| Following     | Occasionally     | Alcoholic     | Regular      | High Class   |
| Following     | No Exercise      | Non Alcoholic | Regular      | Poor         |
| Following     | No Exercise      | Non Alcoholic | Regular      | Middle Class |
| Not Following | Regular Exercise | Non Alcoholic | Occasionally | Middle Class |
| Following     | No Exercise      | Occasionally  | Regular      | Middle Class |
| Following     | Regular Exercise | Non Alcoholic | Regular      | Middle Class |
| Not Following | No Exercise      | Non Alcoholic | Occasionally | Middle Class |
| Following     | Regular Exercise | Non Alcoholic | Regular      | Middle Class |
| Not Following | Regular Exercise | Non Alcoholic | Occasionally | High Class   |
| Occasionally  | Regular Exercise | Non Alcoholic | Regular      | High Class   |
| Occasionally  | Regular Exercise | Non Alcoholic | Regular      | High Class   |
| Occasionally  | Regular Exercise | Non Alcoholic | Occasionally | High Class   |
| Occasionally  | No Exercise      | Non Alcoholic | Regular      | Poor         |
| Occasionally  | No Exercise      | Non Alcoholic | Regular      | High Class   |
| Occasionally  | No Exercise      | Non Alcoholic | Regular      | Middle Class |
| Occasionally  | Regular Exercise | Occasionally  | Occasionally | Poor         |
| Occasionally  | No Exercise      | Non Alcoholic | Regular      | Poor         |
| Occasionally  | Regular Exercise | Non Alcoholic | Regular      | Poor         |
| Occasionally  | No Exercise      | Non Alcoholic | Regular      | Poor         |
| Occasionally  | Regular Exercise | Non Alcoholic | Regular      | Middle Class |
| Occasionally  | No Exercise      | Non Alcoholic | Occasionally | Poor         |
| Occasionally  | No Exercise      | Non Alcoholic | Regular      | High Class   |
| Following     | Regular Exercise | Non Alcoholic | Regular      | High Class   |

|               |                  |               |              |              |
|---------------|------------------|---------------|--------------|--------------|
| Following     | Regular Exercise | Non Alcoholic | Occasionally | Middle Class |
| Occasionally  | Regular Exercise | Non Alcoholic | Regular      | Middle Class |
| Following     | No Exercise      | Non Alcoholic | Occasionally | Middle Class |
| Occasionally  | Regular Exercise | Non Alcoholic | Regular      | Middle Class |
| Occasionally  | No Exercise      | Occasionally  | Regular      | Middle Class |
| Occasionally  | Regular Exercise | Non Alcoholic | Occasionally | High Class   |
| Not Following | Regular Exercise | Non Alcoholic | Regular      | Middle Class |
| Not Following | No Exercise      | Non Alcoholic | Regular      | Poor         |
| Following     | Regular Exercise | Non Alcoholic | Regular      | High Class   |
| Not Following | Regular Exercise | Non Alcoholic | Occasionally | Poor         |
| Following     | No Exercise      | Non Alcoholic | Regular      | Middle Class |
| Following     | Regular Exercise | Non Alcoholic | Non Smoker   | High Class   |
| Not Following | No Exercise      | Non Alcoholic | Regular      | Middle Class |
| Following     | Regular Exercise | Non Alcoholic | Regular      | Poor         |
| Not Following | Regular Exercise | Non Alcoholic | Occasionally | Poor         |
| Not Following | Regular Exercise | Non Alcoholic | Regular      | Middle Class |
| Not Following | Regular Exercise | Alcoholic     | Regular      | Middle Class |
| Following     | No Exercise      | Non Alcoholic | Occasionally | Middle Class |
| Not Following | Regular Exercise | Non Alcoholic | Regular      | High Class   |
| Following     | No Exercise      | Non Alcoholic | Occasionally | High Class   |
| Following     | Regular Exercise | Non Alcoholic | Regular      | High Class   |
| Not Following | Regular Exercise | Non Alcoholic | Regular      | Middle Class |
| Following     | No Exercise      | Non Alcoholic | Occasionally | Middle Class |
| Following     | Regular Exercise | Non Alcoholic | Regular      | Middle Class |
| Following     | No Exercise      | Non Alcoholic | Regular      | Middle Class |
| Not Following | Regular Exercise | Non Alcoholic | Regular      | Poor         |
| Occasionally  | Regular Exercise | Non Alcoholic | Occasionally | Poor         |
| Occasionally  | Occasionally     | Non Alcoholic | Regular      | Poor         |
| Following     | No Exercise      | Non Alcoholic | Regular      | High Class   |
| Following     | Occasionally     | Non Alcoholic | Regular      | High Class   |
| Occasionally  | No Exercise      | Alcoholic     | Regular      | High Class   |
| Occasionally  | Regular Exercise | Non Alcoholic | Occasionally | High Class   |
| Following     | Regular Exercise | Non Alcoholic | Regular      | Middle Class |
| Not Following | Regular Exercise | Non Alcoholic | Regular      | High Class   |
| Not Following | No Exercise      | Non Alcoholic | Occasionally | Middle Class |
| Not Following | No Exercise      | Non Alcoholic | Regular      | High Class   |
| Not Following | No Exercise      | Non Alcoholic | Occasionally | Middle Class |
| Following     | No Exercise      | Non Alcoholic | Regular      | High Class   |
| Not Following | Regular Exercise | Non Alcoholic | Regular      | Poor         |
| Following     | Regular Exercise | Non Alcoholic | Occasionally | Poor         |
| Following     | Regular Exercise | Non Alcoholic | Non Smoker   | Middle Class |
| Following     | No Exercise      | Non Alcoholic | Regular      | Middle Class |
| Following     | No Exercise      | Non Alcoholic | Regular      | Middle Class |
| Occasionally  | Regular Exercise | Occasionally  | Occasionally | Middle Class |
| Following     | Regular Exercise | Occasionally  | Regular      | High Class   |
| Following     | Occasionally     | Alcoholic     | Regular      | High Class   |
| Occasionally  | Regular Exercise | Non Alcoholic | Regular      | High Class   |



|                        |                  |               |              |              |
|------------------------|------------------|---------------|--------------|--------------|
| Occasionally Following | No Exercise      | Non Alcoholic | Regular      | High Class   |
| Not Following          | Regular Exercise | Non Alcoholic | Occasionally | High Class   |
| Not Following          | Regular Exercise | Non Alcoholic | Regular      | Middle Class |
| Following              | No Exercise      | Non Alcoholic | Regular      | Middle Class |
| Not Following          | Regular Exercise | Non Alcoholic | Occasionally | Poor         |
| Not Following          | No Exercise      | Non Alcoholic | Regular      | Middle Class |
| Not Following          | Regular Exercise | Non Alcoholic | Occasionally | Poor         |
| Not Following          | No Exercise      | Occasionally  | Regular      | High Class   |
| Following              | Regular Exercise | Non Alcoholic | Regular      | High Class   |
| Not Following          | Regular Exercise | Non Alcoholic | Occasionally | Poor         |
| Following              | No Exercise      | Non Alcoholic | Regular      | High Class   |
| Following              | Regular Exercise | Non Alcoholic | Regular      | High Class   |
| Not Following          | Regular Exercise | Non Alcoholic | Regular      | High Class   |
| Following              | Regular Exercise | Non Alcoholic | Occasionally | High Class   |
| Following              | Regular Exercise | Non Alcoholic | Non Smoker   | High Class   |
| Not Following          | No Exercise      | Non Alcoholic | Regular      | Poor         |
| Following              | No Exercise      | Non Alcoholic | Regular      | Middle Class |
| Following              | Regular Exercise | Non Alcoholic | Regular      | Middle Class |
| Not Following          | No Exercise      | Non Alcoholic | Occasionally | Poor         |
| Following              | Regular Exercise | Non Alcoholic | Regular      | Poor         |
| Not Following          | Regular Exercise | Non Alcoholic | Regular      | Poor         |
| Following              | Regular Exercise | Alcoholic     | Occasionally | Middle Class |
| Not Following          | Regular Exercise | Non Alcoholic | Regular      | Poor         |
| Not Following          | Regular Exercise | Non Alcoholic | Occasionally | Poor         |
| Not Following          | No Exercise      | Non Alcoholic | Regular      | Poor         |
| Following              | Regular Exercise | Non Alcoholic | Regular      | Poor         |
| Not Following          | No Exercise      | Non Alcoholic | Occasionally | Poor         |
| Not Following          | Regular Exercise | Non Alcoholic | Regular      | High Class   |
| Following              | Regular Exercise | Non Alcoholic | Regular      | Middle Class |
| Following              | Regular Exercise | Non Alcoholic | Regular      | Middle Class |
| Not Following          | Regular Exercise | Non Alcoholic | Occasionally | Middle Class |
| Following              | Regular Exercise | Non Alcoholic | Regular      | High Class   |
| Following              | Regular Exercise | Non Alcoholic | Regular      | High Class   |
| Following              | No Exercise      | Alcoholic     | Regular      | High Class   |
| Not Following          | Regular Exercise | Non Alcoholic | Regular      | Middle Class |
| Following              | Regular Exercise | Non Alcoholic | Occasionally | Middle Class |
| Not Following          | Regular Exercise | Non Alcoholic | Regular      | Middle Class |
| Following              | No Exercise      | Non Alcoholic | Regular      | Middle Class |
| Following              | No Exercise      | Non Alcoholic | Occasionally | Middle Class |
| Not Following          | Regular Exercise | Non Alcoholic | Regular      | Middle Class |
| Not Following          | Regular Exercise | Non Alcoholic | Occasionally | Poor         |
| Following              | Regular Exercise | Non Alcoholic | Regular      | Poor         |
| Not Following          | No Exercise      | Non Alcoholic | Regular      | High Class   |
| Following              | No Exercise      | Non Alcoholic | Occasionally | High Class   |
| Not Following          | Regular Exercise | Non Alcoholic | Regular      | High Class   |
| Not Following          | Regular Exercise | Alcoholic     | Regular      | Poor         |
| Following              | Regular Exercise | Non Alcoholic | Regular      | Poor         |

|               |                  |               |              |              |
|---------------|------------------|---------------|--------------|--------------|
| Not Following | Regular Exercise | Non Alcoholic | Occasionally | Poor         |
| Not Following | Regular Exercise | Non Alcoholic | Regular      | Poor         |
| Occasionally  | Regular Exercise | Alcoholic     | Regular      | Poor         |
| Not Following | Regular Exercise | Non Alcoholic | Regular      | High Class   |
| Not Following | No Exercise      | Non Alcoholic | Regular      | Middle Class |
| Not Following | Regular Exercise | Non Alcoholic | Occasionally | Middle Class |
| Occasionally  | No Exercise      | Non Alcoholic | Regular      | Middle Class |
| Occasionally  | Regular Exercise | Non Alcoholic | Regular      | Middle Class |
| Occasionally  | Regular Exercise | Non Alcoholic | Occasionally | Middle Class |
| Not Following | Regular Exercise | Non Alcoholic | Regular      | Middle Class |
| Not Following | Regular Exercise | Non Alcoholic | Occasionally | Middle Class |
| Occasionally  | Regular Exercise | Non Alcoholic | Regular      | Middle Class |
| Not Following | No Exercise      | Non Alcoholic | Regular      | Middle Class |
| Not Following | Regular Exercise | Non Alcoholic | Regular      | Middle Class |
| Not Following | Regular Exercise | Non Alcoholic | Occasionally | Middle Class |
| Occasionally  | Regular Exercise | Occasionally  | Regular      | Middle Class |
| Occasionally  | Regular Exercise | Non Alcoholic | Regular      | Middle Class |
| Not Following | No Exercise      | Non Alcoholic | Regular      | Middle Class |
| Not Following | Regular Exercise | Non Alcoholic | Non Smoker   | Poor         |
| Following     | Occasionally     | Alcoholic     | Regular      | Poor         |
| Following     | Regular Exercise | Non Alcoholic | Regular      | Poor         |
| Not Following | Regular Exercise | Non Alcoholic | Regular      | Poor         |
| Not Following | Occasionally     | Non Alcoholic | Regular      | Poor         |
| Not Following | Regular Exercise | Non Alcoholic | Occasionally | Poor         |
| Not Following | Regular Exercise | Non Alcoholic | Regular      | Poor         |
| Not Following | Regular Exercise | Non Alcoholic | Regular      | Poor         |
| Following     | Regular Exercise | Non Alcoholic | Occasionally | High Class   |
| Not Following | No Exercise      | Occasionally  | Regular      | High Class   |
| Following     | Regular Exercise | Non Alcoholic | Occasionally | High Class   |
| Not Following | Regular Exercise | Non Alcoholic | Regular      | High Class   |
| Following     | No Exercise      | Non Alcoholic | Regular      | High Class   |
| Following     | Occasionally     | Non Alcoholic | Occasionally | High Class   |
| Following     | Occasionally     | Non Alcoholic | Regular      | Middle Class |
| Not Following | No Exercise      | Non Alcoholic | Regular      | Middle Class |
| Following     | Occasionally     | Non Alcoholic | Regular      | Middle Class |
| Following     | Regular Exercise | Occasionally  | Occasionally | High Class   |
| Following     | No Exercise      | Non Alcoholic | Regular      | High Class   |
| Occasionally  | Regular Exercise | Non Alcoholic | Regular      | High Class   |
| Following     | No Exercise      | Non Alcoholic | Regular      | Poor         |
| Occasionally  | Regular Exercise | Alcoholic     | Regular      | Poor         |
| Following     | Regular Exercise | Non Alcoholic | Occasionally | Middle Class |
| Occasionally  | Regular Exercise | Non Alcoholic | Regular      | High Class   |
| Occasionally  | No Exercise      | Non Alcoholic | Regular      | Middle Class |
| Not Following | Regular Exercise | Non Alcoholic | Occasionally | Poor         |
| Following     | No Exercise      | Non Alcoholic | Regular      | Poor         |
| Not Following | Regular Exercise | Non Alcoholic | Occasionally | Poor         |
| Following     | No Exercise      | Non Alcoholic | Regular      | Poor         |
| Following     | Regular Exercise | Non Alcoholic | Non Smoker   | Poor         |

|               |                  |               |              |              |
|---------------|------------------|---------------|--------------|--------------|
| Not Following | Occasionally     | Non Alcoholic | Occasionally | Poor         |
| Not Following | Regular Exercise | Non Alcoholic | Regular      | Poor         |
| Following     | Regular Exercise | Non Alcoholic | Regular      | High Class   |
| Occasionally  | Regular Exercise | Non Alcoholic | Regular      | Middle Class |
| Following     | Regular Exercise | Non Alcoholic | Occasionally | High Class   |
| Occasionally  | Occasionally     | Non Alcoholic | Regular      | Poor         |
| Occasionally  | Regular Exercise | Non Alcoholic | Regular      | Poor         |
| Occasionally  | Regular Exercise | Occasionally  | Regular      | Poor         |
| Following     | Regular Exercise | Non Alcoholic | Regular      | Poor         |
| Not Following | Occasionally     | Non Alcoholic | Occasionally | High Class   |
| Following     | Regular Exercise | Non Alcoholic | Regular      | High Class   |
| Not Following | Regular Exercise | Non Alcoholic | Regular      | High Class   |
| Not Following | Regular Exercise | Non Alcoholic | Occasionally | High Class   |
| Not Following | No Exercise      | Non Alcoholic | Regular      | Middle Class |
| Not Following | Regular Exercise | Non Alcoholic | Occasionally | Middle Class |
| Not Following | Regular Exercise | Non Alcoholic | Regular      | Middle Class |
| Not Following | Regular Exercise | Occasionally  | Regular      | Middle Class |
| Following     | Regular Exercise | Occasionally  | Occasionally | Middle Class |
| Not Following | Regular Exercise | Non Alcoholic | Regular      | High Class   |
| Not Following | Regular Exercise | Non Alcoholic | Regular      | High Class   |
| Not Following | No Exercise      | Non Alcoholic | Non Smoker   | High Class   |
| Occasionally  | Regular Exercise | Non Alcoholic | Occasionally | Poor         |
| Following     | Regular Exercise | Non Alcoholic | Regular      | Poor         |
| Following     | Regular Exercise | Non Alcoholic | Regular      | Middle Class |
| Following     | Regular Exercise | Occasionally  | Regular      | Poor         |
| Following     | No Exercise      | Occasionally  | Regular      | Middle Class |
| Not Following | Regular Exercise | Non Alcoholic | Occasionally | Poor         |
| Following     | No Exercise      | Non Alcoholic | Regular      | Poor         |
| Not Following | Regular Exercise | Non Alcoholic | Regular      | Middle Class |
| Not Following | No Exercise      | Non Alcoholic | Occasionally | Poor         |
| Not Following | Regular Exercise | Non Alcoholic | Regular      | High Class   |
| Following     | Regular Exercise | Non Alcoholic | Occasionally | High Class   |
| Not Following | Regular Exercise | Non Alcoholic | Regular      | High Class   |
| Following     | Regular Exercise | Non Alcoholic | Regular      | Poor         |
| Not Following | Regular Exercise | Non Alcoholic | Occasionally | Middle Class |
| Following     | Regular Exercise | Non Alcoholic | Regular      | High Class   |
| Not Following | No Exercise      | Non Alcoholic | Regular      | Poor         |
| Not Following | Regular Exercise | Non Alcoholic | Regular      | Poor         |
| Following     | Regular Exercise | Non Alcoholic | Occasionally | Poor         |
| Not Following | Regular Exercise | Non Alcoholic | Regular      | Poor         |
| Following     | No Exercise      | Non Alcoholic | Regular      | Poor         |
| Following     | No Exercise      | Non Alcoholic | Regular      | Poor         |
| Not Following | Regular Exercise | Non Alcoholic | Regular      | Middle Class |
| Not Following | Regular Exercise | Occasionally  | Occasionally | Middle Class |
| Not Following | No Exercise      | Non Alcoholic | Regular      | Middle Class |
| Not Following | Regular Exercise | Occasionally  | Non Smoker   | High Class   |
| Not Following | No Exercise      | Non Alcoholic | Occasionally | High Class   |

|               |                  |               |              |              |
|---------------|------------------|---------------|--------------|--------------|
| Not Following | Regular Exercise | Non Alcoholic | Regular      | High Class   |
| Not Following | No Exercise      | Non Alcoholic | Occasionally | High Class   |
| Following     | Regular Exercise | Non Alcoholic | Regular      | High Class   |
| Following     | Regular Exercise | Non Alcoholic | Regular      | High Class   |
| Not Following | Regular Exercise | Non Alcoholic | Occasionally | Middle Class |
| Not Following | No Exercise      | Non Alcoholic | Regular      | Poor         |
| Following     | No Exercise      | Non Alcoholic | Regular      | Poor         |
| Following     | No Exercise      | Non Alcoholic | Regular      | Poor         |
| Following     | Regular Exercise | Alcoholic     | Occasionally | Poor         |
| Following     | Regular Exercise | Non Alcoholic | Regular      | Middle Class |
| Following     | No Exercise      | Non Alcoholic | Regular      | Middle Class |
| Not Following | Regular Exercise | Non Alcoholic | Regular      | Middle Class |
| Not Following | Regular Exercise | Non Alcoholic | Regular      | Middle Class |
| Following     | Regular Exercise | Non Alcoholic | Occasionally | Middle Class |
| Not Following | No Exercise      | Non Alcoholic | Regular      | Middle Class |
| Not Following | No Exercise      | Alcoholic     | Regular      | High Class   |
| Not Following | Regular Exercise | Non Alcoholic | Occasionally | High Class   |
| Not Following | Regular Exercise | Non Alcoholic | Regular      | High Class   |
| Following     | Regular Exercise | Non Alcoholic | Occasionally | High Class   |
| Not Following | No Exercise      | Non Alcoholic | Regular      | High Class   |
| Following     | Occasionally     | Non Alcoholic | Regular      | High Class   |
| Not Following | No Exercise      | Non Alcoholic | Occasionally | High Class   |
| Not Following | No Exercise      | Non Alcoholic | Regular      | High Class   |
| Following     | No Exercise      | Non Alcoholic | Non Smoker   | Poor         |
| Occasionally  | Regular Exercise | Non Alcoholic | Regular      | Poor         |
| Occasionally  | Occasionally     | Non Alcoholic | Occasionally | Poor         |
| Not Following | Regular Exercise | Non Alcoholic | Regular      | Middle Class |
| Not Following | Regular Exercise | Occasionally  | Non Smoker   | Poor         |
| Not Following | No Exercise      | Non Alcoholic | Regular      | Poor         |
| Occasionally  | Regular Exercise | Non Alcoholic | Regular      | High Class   |
| Not Following | Regular Exercise | Non Alcoholic | Occasionally | Poor         |
| Not Following | No Exercise      | Non Alcoholic | Regular      | Poor         |
| Occasionally  | Regular Exercise | Non Alcoholic | Regular      | Middle Class |
| Following     | No Exercise      | Non Alcoholic | Occasionally | Poor         |
| Following     | Regular Exercise | Non Alcoholic | Regular      | Poor         |
| Occasionally  | No Exercise      | Non Alcoholic | Occasionally | High Class   |
| Not Following | Regular Exercise | Non Alcoholic | Regular      | Poor         |
| Occasionally  | Occasionally     | Non Alcoholic | Regular      | Poor         |
| Occasionally  | Regular Exercise | Non Alcoholic | Occasionally | Middle Class |
| Occasionally  | Regular Exercise | Non Alcoholic | Regular      | Poor         |
| Occasionally  | Regular Exercise | Non Alcoholic | Regular      | Poor         |
| Following     | Regular Exercise | Non Alcoholic | Regular      | Middle Class |
| Occasionally  | Regular Exercise | Non Alcoholic | Occasionally | Poor         |
| Occasionally  | No Exercise      | Non Alcoholic | Regular      | Poor         |
| Following     | Occasionally     | Non Alcoholic | Regular      | Middle Class |
| Occasionally  | No Exercise      | Alcoholic     | Regular      | Middle Class |
| Not Following | No Exercise      | Non Alcoholic | Regular      | Middle Class |

|               |                  |               |              |              |
|---------------|------------------|---------------|--------------|--------------|
| Not Following | Regular Exercise | Non Alcoholic | Occasionally | Middle Class |
| Not Following | Regular Exercise | Non Alcoholic | Non Smoker   | Poor         |
| Following     | No Exercise      | Non Alcoholic | Regular      | Poor         |
| Following     | Regular Exercise | Alcoholic     | Occasionally | Poor         |
| Following     | No Exercise      | Non Alcoholic | Regular      | High Class   |
| Following     | No Exercise      | Non Alcoholic | Occasionally | High Class   |
| Not Following | No Exercise      | Non Alcoholic | Regular      | High Class   |
| Following     | Occasionally     | Non Alcoholic | Regular      | High Class   |
| Occasionally  | Regular Exercise | Non Alcoholic | Occasionally | High Class   |
| Occasionally  | Regular Exercise | Non Alcoholic | Regular      | Poor         |
| Occasionally  | No Exercise      | Non Alcoholic | Regular      | Poor         |
| Following     | Regular Exercise | Alcoholic     | Regular      | High Class   |
| Not Following | No Exercise      | Non Alcoholic | Occasionally | High Class   |
| Not Following | Regular Exercise | Non Alcoholic | Regular      | High Class   |
| Following     | No Exercise      | Non Alcoholic | Regular      | High Class   |
| Following     | Regular Exercise | Non Alcoholic | Regular      | Middle Class |
| Following     | No Exercise      | Non Alcoholic | Regular      | Middle Class |
| Not Following | Occasionally     | Non Alcoholic | Occasionally | Middle Class |
| Following     | No Exercise      | Non Alcoholic | Regular      | Middle Class |
| Following     | No Exercise      | Non Alcoholic | Regular      | High Class   |
| Not Following | Occasionally     | Non Alcoholic | Occasionally | Middle Class |
| Not Following | No Exercise      | Non Alcoholic | Regular      | Middle Class |
| Not Following | Occasionally     | Occasionally  | Occasionally | High Class   |
| Following     | Regular Exercise | Non Alcoholic | Regular      | Middle Class |
| Following     | No Exercise      | Non Alcoholic | Regular      | Middle Class |
| Following     | No Exercise      | Non Alcoholic | Occasionally | Poor         |
| Not Following | Occasionally     | Non Alcoholic | Non Smoker   | Poor         |
| Following     | No Exercise      | Non Alcoholic | Regular      | High Class   |
| Not Following | No Exercise      | Occasionally  | Regular      | High Class   |
| Not Following | Occasionally     | Non Alcoholic | Occasionally | High Class   |
| Not Following | Regular Exercise | Non Alcoholic | Regular      | High Class   |
| Following     | Regular Exercise | Non Alcoholic | Regular      | Poor         |
| Not Following | Regular Exercise | Non Alcoholic | Regular      | Poor         |
| Following     | No Exercise      | Non Alcoholic | Regular      | Poor         |
| Following     | No Exercise      | Non Alcoholic | Occasionally | High Class   |
| Following     | Regular Exercise | Non Alcoholic | Regular      | High Class   |
| Not Following | Regular Exercise | Non Alcoholic | Regular      | High Class   |
| Following     | Regular Exercise | Non Alcoholic | Occasionally | High Class   |
| Not Following | Regular Exercise | Non Alcoholic | Regular      | High Class   |
| Not Following | Occasionally     | Non Alcoholic | Occasionally | Poor         |
| Following     | Regular Exercise | Alcoholic     | Regular      | High Class   |
| Following     | Regular Exercise | Non Alcoholic | Regular      | Middle Class |
| Following     | Regular Exercise | Non Alcoholic | Occasionally | Middle Class |
| Following     | Regular Exercise | Non Alcoholic | Regular      | Poor         |
| Following     | No Exercise      | Non Alcoholic | Regular      | Middle Class |
| Following     | Regular Exercise | Non Alcoholic | Regular      | Poor         |
| Not Following | Regular Exercise | Non Alcoholic | Occasionally | Poor         |

|               |                  |               |              |              |
|---------------|------------------|---------------|--------------|--------------|
| Following     | Occasionally     | Non Alcoholic | Regular      | High Class   |
| Following     | No Exercise      | Non Alcoholic | Regular      | Poor         |
| Following     | Regular Exercise | Non Alcoholic | Regular      | High Class   |
| Following     | Regular Exercise | Non Alcoholic | Regular      | Middle Class |
| Following     | No Exercise      | Non Alcoholic | Non Smoker   | Poor         |
| Following     | Regular Exercise | Non Alcoholic | Regular      | Poor         |
| Following     | No Exercise      | Non Alcoholic | Regular      | High Class   |
| Not Following | Regular Exercise | Non Alcoholic | Occasionally | High Class   |
| Not Following | No Exercise      | Non Alcoholic | Non Smoker   | Middle Class |
| Not Following | No Exercise      | Occasionally  | Occasionally | High Class   |
| Not Following | Regular Exercise | Non Alcoholic | Regular      | High Class   |
| Following     | Regular Exercise | Non Alcoholic | Regular      | High Class   |
| Following     | No Exercise      | Non Alcoholic | Occasionally | Poor         |
| Occasionally  | Occasionally     | Non Alcoholic | Regular      | Middle Class |
| Following     | No Exercise      | Non Alcoholic | Regular      | Poor         |
| Following     | Regular Exercise | Non Alcoholic | Regular      | Middle Class |
| Not Following | No Exercise      | Non Alcoholic | Occasionally | Poor         |
| Following     | Regular Exercise | Non Alcoholic | Regular      | Poor         |
| Following     | Occasionally     | Non Alcoholic | Regular      | Poor         |
| Following     | Regular Exercise | Occasionally  | Regular      | Middle Class |
| Not Following | Regular Exercise | Non Alcoholic | Regular      | Middle Class |
| Not Following | No Exercise      | Non Alcoholic | Occasionally | Middle Class |
| Following     | No Exercise      | Non Alcoholic | Regular      | Middle Class |
| Not Following | Regular Exercise | Non Alcoholic | Regular      | High Class   |
| Following     | No Exercise      | Non Alcoholic | Occasionally | High Class   |
| Not Following | Regular Exercise | Non Alcoholic | Regular      | High Class   |
| Following     | Regular Exercise | Non Alcoholic | Occasionally | High Class   |
| Not Following | Regular Exercise | Alcoholic     | Regular      | High Class   |
| Following     | Regular Exercise | Non Alcoholic | Regular      | High Class   |
| Not Following | Regular Exercise | Non Alcoholic | Non Smoker   | High Class   |
| Following     | Regular Exercise | Non Alcoholic | Regular      | Middle Class |
| Occasionally  | Regular Exercise | Non Alcoholic | Regular      | Middle Class |
| Not Following | Regular Exercise | Non Alcoholic | Regular      | Middle Class |
| Occasionally  | Regular Exercise | Non Alcoholic | Occasionally | High Class   |
| Not Following | Regular Exercise | Non Alcoholic | Regular      | High Class   |
| Not Following | Regular Exercise | Non Alcoholic | Regular      | High Class   |
| Occasionally  | Regular Exercise | Non Alcoholic | Regular      | High Class   |
| Not Following | Regular Exercise | Non Alcoholic | Regular      | High Class   |
| Occasionally  | Regular Exercise | Non Alcoholic | Occasionally | High Class   |
| Not Following | Regular Exercise | Non Alcoholic | Regular      | High Class   |
| Occasionally  | Regular Exercise | Non Alcoholic | Occasionally | Middle Class |
| Not Following | Regular Exercise | Non Alcoholic | Regular      | Middle Class |
| Occasionally  | Regular Exercise | Non Alcoholic | Occasionally | High Class   |
| Not Following | Regular Exercise | Non Alcoholic | Regular      | High Class   |
| Occasionally  | No Exercise      | Non Alcoholic | Regular      | Middle Class |
| Occasionally  | Occasionally     | Non Alcoholic | Occasionally | High Class   |

|               |                  |               |              |              |
|---------------|------------------|---------------|--------------|--------------|
| Not Following | No Exercise      | Alcoholic     | Regular      | Middle Class |
| Not Following | No Exercise      | Non Alcoholic | Regular      | High Class   |
| Occasionally  | Regular Exercise | Non Alcoholic | Regular      | Poor         |
| Occasionally  | Regular Exercise | Non Alcoholic | Occasionally | Poor         |
| Not Following | Regular Exercise | Non Alcoholic | Regular      | Poor         |
| Not Following | Regular Exercise | Alcoholic     | Regular      | Poor         |
| Not Following | Regular Exercise | Non Alcoholic | Regular      | Poor         |
| Not Following | No Exercise      | Non Alcoholic | Non Smoker   | Poor         |
| Not Following | Regular Exercise | Non Alcoholic | Occasionally | Middle Class |
| Not Following | No Exercise      | Non Alcoholic | Regular      | Middle Class |
| Following     | Regular Exercise | Non Alcoholic | Regular      | Middle Class |
| Following     | Occasionally     | Non Alcoholic | Occasionally | Middle Class |
| Following     | Regular Exercise | Non Alcoholic | Regular      | High Class   |
| Not Following | Regular Exercise | Non Alcoholic | Occasionally | Poor         |
| Not Following | No Exercise      | Alcoholic     | Regular      | Poor         |
| Following     | No Exercise      | Non Alcoholic | Regular      | High Class   |
| Following     | No Exercise      | Non Alcoholic | Occasionally | Middle Class |
| Not Following | No Exercise      | Alcoholic     | Regular      | Middle Class |
| Occasionally  | Regular Exercise | Alcoholic     | Regular      | Middle Class |
| Following     | Regular Exercise | Non Alcoholic | Regular      | High Class   |
| Occasionally  | Regular Exercise | Non Alcoholic | Occasionally | High Class   |
| Following     | No Exercise      | Non Alcoholic | Regular      | High Class   |
| Following     | Regular Exercise | Non Alcoholic | Regular      | Poor         |
| Following     | Regular Exercise | Non Alcoholic | Regular      | Poor         |
| Occasionally  | Regular Exercise | Non Alcoholic | Regular      | High Class   |
| Following     | No Exercise      | Non Alcoholic | Occasionally | Middle Class |
| Not Following | Regular Exercise | Non Alcoholic | Regular      | High Class   |
| Following     | Regular Exercise | Non Alcoholic | Regular      | Poor         |
| Not Following | Regular Exercise | Non Alcoholic | Occasionally | High Class   |
| Not Following | No Exercise      | Non Alcoholic | Regular      | High Class   |
| Not Following | Regular Exercise | Alcoholic     | Occasionally | High Class   |
| Not Following | No Exercise      | Non Alcoholic | Regular      | High Class   |
| Following     | Regular Exercise | Non Alcoholic | Non Smoker   | Poor         |
| Not Following | No Exercise      | Non Alcoholic | Occasionally | High Class   |
| Not Following | Regular Exercise | Non Alcoholic | Regular      | High Class   |
| Following     | No Exercise      | Non Alcoholic | Regular      | Poor         |
| Not Following | Regular Exercise | Non Alcoholic | Non Smoker   | High Class   |
| Following     | No Exercise      | Non Alcoholic | Occasionally | Poor         |
| Not Following | Regular Exercise | Non Alcoholic | Regular      | Middle Class |
| Following     | No Exercise      | Alcoholic     | Regular      | Poor         |
| Not Following | Regular Exercise | Alcoholic     | Regular      | Middle Class |
| Not Following | No Exercise      | Non Alcoholic | Regular      | Middle Class |
| Following     | Regular Exercise | Non Alcoholic | Occasionally | Poor         |
| Following     | No Exercise      | Non Alcoholic | Regular      | Poor         |
| Not Following | Regular Exercise | Non Alcoholic | Regular      | Middle Class |
| Following     | No Exercise      | Non Alcoholic | Occasionally | Middle Class |
| Following     | Regular Exercise | Non Alcoholic | Regular      | Middle Class |

|               |                  |               |              |              |
|---------------|------------------|---------------|--------------|--------------|
| Not Following | Regular Exercise | Non Alcoholic | Occasionally | Middle Class |
| Not Following | Regular Exercise | Non Alcoholic | Regular      | Middle Class |
| Following     | No Exercise      | Non Alcoholic | Regular      | Poor         |
| Not Following | No Exercise      | Alcoholic     | Occasionally | Middle Class |
| Following     | No Exercise      | Non Alcoholic | Regular      | Middle Class |
| Following     | Regular Exercise | Non Alcoholic | Regular      | High Class   |
| Following     | No Exercise      | Non Alcoholic | Regular      | High Class   |
| Not Following | No Exercise      | Non Alcoholic | Occasionally | High Class   |
| Not Following | No Exercise      | Non Alcoholic | Regular      | High Class   |
| Not Following | No Exercise      | Non Alcoholic | Regular      | High Class   |
| Following     | Regular Exercise | Non Alcoholic | Non Smoker   | Poor         |
| Not Following | Regular Exercise | Non Alcoholic | Regular      | Poor         |
| Following     | Regular Exercise | Non Alcoholic | Occasionally | Poor         |
| Following     | No Exercise      | Non Alcoholic | Regular      | Poor         |
| Not Following | No Exercise      | Non Alcoholic | Regular      | High Class   |
| Following     | Regular Exercise | Non Alcoholic | Occasionally | Poor         |
| Not Following | No Exercise      | Alcoholic     | Regular      | High Class   |
| Not Following | Regular Exercise | Non Alcoholic | Occasionally | High Class   |
| Following     | Regular Exercise | Non Alcoholic | Regular      | Poor         |
| Following     | Occasionally     | Non Alcoholic | Regular      | Poor         |
| Following     | Regular Exercise | Non Alcoholic | Occasionally | Poor         |
| Following     | Occasionally     | Non Alcoholic | Regular      | Middle Class |
| Occasionally  | No Exercise      | Non Alcoholic | Regular      | Poor         |
| Following     | No Exercise      | Non Alcoholic | Regular      | High Class   |
| Following     | No Exercise      | Non Alcoholic | Occasionally | High Class   |
| Occasionally  | No Exercise      | Occasionally  | Regular      | High Class   |
| Following     | Regular Exercise | Non Alcoholic | Regular      | Middle Class |
| Occasionally  | No Exercise      | Non Alcoholic | Regular      | Middle Class |
| Following     | No Exercise      | Non Alcoholic | Regular      | Poor         |
| Following     | No Exercise      | Non Alcoholic | Occasionally | Poor         |
| Not Following | Regular Exercise | Occasionally  | Regular      | Middle Class |
| Not Following | Regular Exercise | Occasionally  | Regular      | Middle Class |
| Following     | Regular Exercise | Non Alcoholic | Occasionally | Poor         |
| Not Following | Regular Exercise | Non Alcoholic | Regular      | High Class   |
| Not Following | Regular Exercise | Non Alcoholic | Occasionally | High Class   |
| Following     | Regular Exercise | Non Alcoholic | Non Smoker   | Poor         |
| Not Following | Regular Exercise | Non Alcoholic | Regular      | High Class   |
| Not Following | Regular Exercise | Non Alcoholic | Occasionally | High Class   |
| Not Following | Occasionally     | Non Alcoholic | Regular      | High Class   |
| Not Following | No Exercise      | Non Alcoholic | Regular      | Middle Class |
| Following     | Occasionally     | Alcoholic     | Regular      | Poor         |
| Occasionally  | No Exercise      | Non Alcoholic | Occasionally | Middle Class |
| Occasionally  | No Exercise      | Non Alcoholic | Regular      | High Class   |
| Occasionally  | Occasionally     | Non Alcoholic | Regular      | High Class   |
| Not Following | Regular Exercise | Non Alcoholic | Regular      | Middle Class |
| Not Following | Regular Exercise | Non Alcoholic | Regular      | High Class   |
| Not Following | No Exercise      | Non Alcoholic | Occasionally | High Class   |



|               |                  |               |              |              |
|---------------|------------------|---------------|--------------|--------------|
| Occasionally  | Regular Exercise | Non Alcoholic | Regular      | High Class   |
| Not Following | Regular Exercise | Non Alcoholic | Regular      | Middle Class |
| Not Following | Regular Exercise | Non Alcoholic | Occasionally | High Class   |
| Occasionally  | Regular Exercise | Non Alcoholic | Regular      | High Class   |
| Not Following | Regular Exercise | Non Alcoholic | Occasionally | Middle Class |
| Occasionally  | Regular Exercise | Non Alcoholic | Regular      | High Class   |
| Not Following | No Exercise      | Non Alcoholic | Regular      | High Class   |
| Following     | No Exercise      | Occasionally  | Occasionally | Poor         |
| Following     | Regular Exercise | Non Alcoholic | Regular      | Middle Class |
| Following     | No Exercise      | Non Alcoholic | Regular      | Middle Class |
| Following     | Regular Exercise | Non Alcoholic | Non Smoker   | Poor         |
| Not Following | No Exercise      | Non Alcoholic | Occasionally | Poor         |
| Following     | No Exercise      | Non Alcoholic | Regular      | Middle Class |
| Following     | No Exercise      | Non Alcoholic | Regular      | Poor         |
| Not Following | No Exercise      | Non Alcoholic | Regular      | Middle Class |
| Not Following | Regular Exercise | Non Alcoholic | Regular      | High Class   |
| Not Following | Regular Exercise | Non Alcoholic | Occasionally | High Class   |
| Following     | No Exercise      | Non Alcoholic | Regular      | High Class   |
| Not Following | Regular Exercise | Non Alcoholic | Regular      | High Class   |
| Occasionally  | No Exercise      | Non Alcoholic | Occasionally | High Class   |
| Not Following | Occasionally     | Alcoholic     | Regular      | High Class   |
| Not Following | No Exercise      | Non Alcoholic | Occasionally | High Class   |
| Not Following | Regular Exercise | Non Alcoholic | Regular      | High Class   |
| Not Following | No Exercise      | Non Alcoholic | Regular      | High Class   |
| Occasionally  | Regular Exercise | Non Alcoholic | Occasionally | High Class   |
| Not Following | Regular Exercise | Non Alcoholic | Regular      | High Class   |
| Not Following | Regular Exercise | Occasionally  | Regular      | High Class   |
| Following     | No Exercise      | Non Alcoholic | Regular      | High Class   |
| Not Following | No Exercise      | Non Alcoholic | Occasionally | High Class   |
| Following     | Regular Exercise | Non Alcoholic | Regular      | High Class   |
| Following     | No Exercise      | Non Alcoholic | Occasionally | High Class   |
| Not Following | Regular Exercise | Occasionally  | Regular      | Middle Class |
| Not Following | Regular Exercise | Occasionally  | Regular      | Middle Class |
| Not Following | Regular Exercise | Non Alcoholic | Occasionally | Middle Class |
| Not Following | Occasionally     | Non Alcoholic | Regular      | Poor         |
| Occasionally  | Regular Exercise | Non Alcoholic | Regular      | Poor         |
| Occasionally  | Regular Exercise | Non Alcoholic | Regular      | High Class   |
| Occasionally  | Occasionally     | Occasionally  | Occasionally | Middle Class |
| Occasionally  | Regular Exercise | Non Alcoholic | Regular      | High Class   |
| Following     | Regular Exercise | Non Alcoholic | Regular      | Poor         |
| Not Following | Regular Exercise | Non Alcoholic | Regular      | Middle Class |
| Not Following | Regular Exercise | Non Alcoholic | Regular      | High Class   |
| Not Following | Regular Exercise | Non Alcoholic | Occasionally | Poor         |
| Not Following | Regular Exercise | Occasionally  | Non Smoker   | Middle Class |
| Not Following | Occasionally     | Non Alcoholic | Regular      | High Class   |
| Not Following | Regular Exercise | Non Alcoholic | Occasionally | Middle Class |
| Following     | Regular Exercise | Occasionally  | Regular      | Poor         |

|               |                  |               |              |              |
|---------------|------------------|---------------|--------------|--------------|
| Not Following | Occasionally     | Non Alcoholic | Occasionally | High Class   |
| Not Following | Regular Exercise | Non Alcoholic | Regular      | Middle Class |
| Not Following | Regular Exercise | Non Alcoholic | Regular      | Poor         |
| Not Following | Regular Exercise | Non Alcoholic | Occasionally | High Class   |
| Following     | No Exercise      | Non Alcoholic | Regular      | Middle Class |
| Following     | No Exercise      | Non Alcoholic | Regular      | High Class   |
| Not Following | No Exercise      | Occasionally  | Regular      | Middle Class |
| Not Following | No Exercise      | Non Alcoholic | Occasionally | Poor         |
| Following     | No Exercise      | Non Alcoholic | Regular      | Poor         |
| Not Following | Regular Exercise | Non Alcoholic | Regular      | Poor         |
| Following     | Regular Exercise | Non Alcoholic | Regular      | Poor         |
| Following     | Occasionally     | Occasionally  | Regular      | High Class   |
| Occasionally  | Regular Exercise | Non Alcoholic | Occasionally | High Class   |
| Not Following | No Exercise      | Non Alcoholic | Regular      | Poor         |
| Not Following | Regular Exercise | Non Alcoholic | Regular      | High Class   |
| Occasionally  | No Exercise      | Non Alcoholic | Occasionally | High Class   |
| Occasionally  | Regular Exercise | Non Alcoholic | Regular      | Middle Class |
| Occasionally  | No Exercise      | Occasionally  | Occasionally | High Class   |
| Occasionally  | Regular Exercise | Non Alcoholic | Regular      | Middle Class |
| Occasionally  | Regular Exercise | Non Alcoholic | Regular      | High Class   |
| Not Following | No Exercise      | Non Alcoholic | Occasionally | Poor         |
| Following     | Occasionally     | Non Alcoholic | Regular      | Poor         |
| Not Following | No Exercise      | Non Alcoholic | Regular      | Poor         |
| Occasionally  | No Exercise      | Occasionally  | Regular      | Poor         |
| Following     | Regular Exercise | Non Alcoholic | Occasionally | Poor         |
| Following     | Regular Exercise | Non Alcoholic | Non Smoker   | High Class   |
| Not Following | Regular Exercise | Non Alcoholic | Regular      | High Class   |
| Not Following | Regular Exercise | Non Alcoholic | Regular      | Poor         |
| Following     | Regular Exercise | Non Alcoholic | Regular      | Poor         |
| Not Following | Regular Exercise | Non Alcoholic | Occasionally | High Class   |
| Not Following | Occasionally     | Non Alcoholic | Regular      | Poor         |
| Following     | No Exercise      | Alcoholic     | Regular      | Middle Class |
| Occasionally  | Regular Exercise | Non Alcoholic | Occasionally | Middle Class |
| Not Following | Regular Exercise | Non Alcoholic | Regular      | Middle Class |
| Following     | Regular Exercise | Non Alcoholic | Occasionally | Poor         |
| Following     | No Exercise      | Non Alcoholic | Regular      | Poor         |
| Not Following | Regular Exercise | Non Alcoholic | Regular      | High Class   |
| Not Following | No Exercise      | Non Alcoholic | Occasionally | Middle Class |
| Not Following | Regular Exercise | Non Alcoholic | Regular      | Poor         |
| Not Following | Occasionally     | Non Alcoholic | Regular      | Poor         |
| Occasionally  | Regular Exercise | Non Alcoholic | Regular      | Middle Class |
| Following     | No Exercise      | Non Alcoholic | Occasionally | Middle Class |
| Occasionally  | Regular Exercise | Non Alcoholic | Regular      | High Class   |
| Following     | Occasionally     | Non Alcoholic | Regular      | High Class   |
| Occasionally  | Regular Exercise | Alcoholic     | Regular      | High Class   |
| Following     | No Exercise      | Non Alcoholic | Regular      | Poor         |
| Occasionally  | Regular Exercise | Non Alcoholic | Non Smoker   | Poor         |

|                        |                  |               |              |              |
|------------------------|------------------|---------------|--------------|--------------|
| Occasionally Following | No Exercise      | Non Alcoholic | Regular      | High Class   |
| Occasionally Following | Occasionally     | Non Alcoholic | Regular      | Middle Class |
| Occasionally Following | No Exercise      | Non Alcoholic | Occasionally | High Class   |
| Occasionally           | Regular Exercise | Alcoholic     | Regular      | Middle Class |
| Occasionally           | Occasionally     | Non Alcoholic | Occasionally | High Class   |
| Occasionally           | Regular Exercise | Non Alcoholic | Regular      | High Class   |
| Not Following          | Regular Exercise | Non Alcoholic | Regular      | High Class   |
| Not Following          | Regular Exercise | Non Alcoholic | Occasionally | High Class   |
| Not Following          | No Exercise      | Non Alcoholic | Regular      | High Class   |
| Not Following          | Occasionally     | Non Alcoholic | Regular      | Poor         |
| Not Following          | No Exercise      | Occasionally  | Regular      | High Class   |
| Following              | Occasionally     | Non Alcoholic | Occasionally | High Class   |
| Following              | No Exercise      | Non Alcoholic | Regular      | High Class   |
| Following              | No Exercise      | Non Alcoholic | Regular      | High Class   |
| Not Following          | No Exercise      | Occasionally  | Regular      | High Class   |
| Following              | Occasionally     | Non Alcoholic | Regular      | Middle Class |
| Not Following          | Regular Exercise | Non Alcoholic | Occasionally | High Class   |
| Following              | Occasionally     | Non Alcoholic | Regular      | Middle Class |
| Not Following          | Regular Exercise | Non Alcoholic | Regular      | Poor         |
| Not Following          | No Exercise      | Occasionally  | Occasionally | High Class   |
| Following              | No Exercise      | Non Alcoholic | Regular      | Middle Class |
| Following              | Regular Exercise | Non Alcoholic | Occasionally | Poor         |
| Not Following          | No Exercise      | Occasionally  | Regular      | Poor         |
| Following              | Regular Exercise | Non Alcoholic | Regular      | Poor         |
| Following              | Regular Exercise | Occasionally  | Occasionally | Poor         |
| Following              | Regular Exercise | Occasionally  | Regular      | Poor         |
| Following              | Regular Exercise | Non Alcoholic | Regular      | High Class   |
| Not Following          | Regular Exercise | Non Alcoholic | Regular      | Poor         |
| Not Following          | Occasionally     | Non Alcoholic | Occasionally | High Class   |
| Not Following          | No Exercise      | Non Alcoholic | Regular      | Poor         |
| Following              | No Exercise      | Non Alcoholic | Regular      | Poor         |
| Not Following          | No Exercise      | Non Alcoholic | Regular      | High Class   |
| Following              | Regular Exercise | Non Alcoholic | Regular      | Middle Class |
| Following              | No Exercise      | Non Alcoholic | Occasionally | Middle Class |
| Not Following          | No Exercise      | Non Alcoholic | Regular      | Middle Class |
| Not Following          | No Exercise      | Non Alcoholic | Regular      | Poor         |
| Following              | Occasionally     | Non Alcoholic | Occasionally | High Class   |
| Not Following          | Regular Exercise | Non Alcoholic | Regular      | Middle Class |
| Following              | Regular Exercise | Non Alcoholic | Occasionally | Poor         |
| Following              | Regular Exercise | Non Alcoholic | Regular      | Poor         |
| Not Following          | Regular Exercise | Non Alcoholic | Regular      | High Class   |
| Not Following          | Occasionally     | Non Alcoholic | Occasionally | Poor         |
| Not Following          | Regular Exercise | Non Alcoholic | Regular      | Poor         |
| Not Following          | Regular Exercise | Occasionally  | Regular      | Middle Class |
| Not Following          | No Exercise      | Occasionally  | Regular      | Poor         |
| Not Following          | Occasionally     | Non Alcoholic | Occasionally | Poor         |
| Following              | No Exercise      | Non Alcoholic | Regular      | High Class   |

|               |                  |               |              |              |
|---------------|------------------|---------------|--------------|--------------|
| Not Following | Occasionally     | Non Alcoholic | Regular      | High Class   |
| Not Following | No Exercise      | Non Alcoholic | Regular      | Poor         |
| Following     | No Exercise      | Non Alcoholic | Regular      | Poor         |
| Not Following | Regular Exercise | Non Alcoholic | Occasionally | Poor         |
| Not Following | Regular Exercise | Non Alcoholic | Regular      | Poor         |
| Following     | No Exercise      | Non Alcoholic | Regular      | Poor         |
| Not Following | Regular Exercise | Non Alcoholic | Non Smoker   | High Class   |
| Not Following | Regular Exercise | Occasionally  | Regular      | High Class   |
| Not Following | Regular Exercise | Non Alcoholic | Occasionally | High Class   |
| Not Following | Regular Exercise | Non Alcoholic | Regular      | Middle Class |
| Following     | Regular Exercise | Non Alcoholic | Regular      | High Class   |
| Following     | Regular Exercise | Non Alcoholic | Occasionally | Poor         |
| Following     | No Exercise      | Non Alcoholic | Regular      | Poor         |
| Following     | No Exercise      | Non Alcoholic | Regular      | Poor         |
| Following     | Regular Exercise | Non Alcoholic | Regular      | Poor         |
| Not Following | No Exercise      | Occasionally  | Occasionally | High Class   |
| Following     | Regular Exercise | Non Alcoholic | Regular      | High Class   |
| Not Following | No Exercise      | Non Alcoholic | Regular      | High Class   |
| Following     | No Exercise      | Non Alcoholic | Regular      | High Class   |
| Following     | No Exercise      | Non Alcoholic | Regular      | Middle Class |
| Occasionally  | Occasionally     | Non Alcoholic | Occasionally | Middle Class |
| Not Following | Regular Exercise | Non Alcoholic | Regular      | Middle Class |
| Not Following | Regular Exercise | Non Alcoholic | Regular      | Middle Class |
| Not Following | No Exercise      | Non Alcoholic | Occasionally | Middle Class |
| Occasionally  | Regular Exercise | Non Alcoholic | Regular      | High Class   |
| Occasionally  | No Exercise      | Occasionally  | Occasionally | High Class   |
| Not Following | Regular Exercise | Non Alcoholic | Regular      | High Class   |
| Occasionally  | No Exercise      | Non Alcoholic | Non Smoker   | Poor         |
| Not Following | Regular Exercise | Non Alcoholic | Occasionally | Poor         |
| Occasionally  | No Exercise      | Non Alcoholic | Regular      | Middle Class |
| Occasionally  | Regular Exercise | Non Alcoholic | Regular      | Poor         |
| Not Following | Regular Exercise | Non Alcoholic | Regular      | Middle Class |
| Not Following | Regular Exercise | Occasionally  | Occasionally | Poor         |
| Occasionally  | No Exercise      | Non Alcoholic | Regular      | Poor         |
| Following     | Regular Exercise | Non Alcoholic | Regular      | Middle Class |
| Following     | No Exercise      | Non Alcoholic | Regular      | Poor         |
| Following     | Regular Exercise | Non Alcoholic | Regular      | High Class   |
| Not Following | Regular Exercise | Non Alcoholic | Occasionally | High Class   |
| Not Following | Regular Exercise | Non Alcoholic | Regular      | High Class   |
| Not Following | Regular Exercise | Non Alcoholic | Regular      | Poor         |
| Occasionally  | Regular Exercise | Alcoholic     | Occasionally | Middle Class |
| Occasionally  | No Exercise      | Non Alcoholic | Regular      | High Class   |
| Following     | No Exercise      | Non Alcoholic | Occasionally | Poor         |
| Following     | No Exercise      | Non Alcoholic | Regular      | Poor         |
| Following     | No Exercise      | Non Alcoholic | Regular      | Poor         |
| Occasionally  | Regular Exercise | Non Alcoholic | Occasionally | Poor         |
| Occasionally  | No Exercise      | Non Alcoholic | Regular      | Poor         |

|               |                  |               |              |              |
|---------------|------------------|---------------|--------------|--------------|
| Following     | Regular Exercise | Non Alcoholic | Regular      | Poor         |
| Occasionally  | No Exercise      | Non Alcoholic | Regular      | Middle Class |
| Occasionally  | Regular Exercise | Non Alcoholic | Occasionally | Middle Class |
| Occasionally  | No Exercise      | Non Alcoholic | Regular      | Middle Class |
| Occasionally  | Regular Exercise | Non Alcoholic | Regular      | High Class   |
| Occasionally  | No Exercise      | Non Alcoholic | Regular      | High Class   |
| Occasionally  | No Exercise      | Non Alcoholic | Regular      | High Class   |
| Occasionally  | Regular Exercise | Alcoholic     | Occasionally | High Class   |
| Occasionally  | No Exercise      | Non Alcoholic | Regular      | High Class   |
| Occasionally  | Regular Exercise | Non Alcoholic | Regular      | High Class   |
| Occasionally  | No Exercise      | Non Alcoholic | Occasionally | Middle Class |
| Occasionally  | Regular Exercise | Non Alcoholic | Regular      | Poor         |
| Following     | Regular Exercise | Non Alcoholic | Occasionally | Poor         |
| Not Following | No Exercise      | Non Alcoholic | Regular      | Poor         |
| Not Following | Regular Exercise | Non Alcoholic | Regular      | Poor         |
| Not Following | No Exercise      | Non Alcoholic | Occasionally | Middle Class |
| Following     | Regular Exercise | Non Alcoholic | Regular      | Middle Class |
| Not Following | No Exercise      | Non Alcoholic | Regular      | Middle Class |
| Following     | Regular Exercise | Non Alcoholic | Regular      | Middle Class |
| Not Following | No Exercise      | Non Alcoholic | Occasionally | Middle Class |
| Following     | Regular Exercise | Non Alcoholic | Regular      | Middle Class |
| Following     | Regular Exercise | Non Alcoholic | Regular      | High Class   |
| Not Following | No Exercise      | Non Alcoholic | Regular      | High Class   |
| Not Following | Regular Exercise | Non Alcoholic | Regular      | High Class   |
| Following     | Regular Exercise | Non Alcoholic | Occasionally | High Class   |
| Following     | No Exercise      | Non Alcoholic | Regular      | High Class   |
| Not Following | Regular Exercise | Non Alcoholic | Regular      | High Class   |
| Following     | No Exercise      | Non Alcoholic | Occasionally | High Class   |
| Not Following | Regular Exercise | Occasionally  | Regular      | High Class   |
| Not Following | Regular Exercise | Non Alcoholic | Occasionally | Poor         |
| Following     | No Exercise      | Non Alcoholic | Non Smoker   | Poor         |
| Not Following | No Exercise      | Non Alcoholic | Regular      | Poor         |
| Following     | Regular Exercise | Non Alcoholic | Occasionally | Middle Class |
| Following     | No Exercise      | Non Alcoholic | Regular      | Poor         |
| Not Following | Regular Exercise | Non Alcoholic | Regular      | Poor         |
| Not Following | No Exercise      | Occasionally  | Regular      | High Class   |
| Not Following | Regular Exercise | Non Alcoholic | Occasionally | Poor         |
| Following     | Regular Exercise | Non Alcoholic | Regular      | Poor         |
| Not Following | No Exercise      | Occasionally  | Regular      | Middle Class |
| Following     | Regular Exercise | Non Alcoholic | Regular      | Poor         |
| Occasionally  | No Exercise      | Non Alcoholic | Regular      | Poor         |
| Not Following | Regular Exercise | Non Alcoholic | Occasionally | High Class   |
| Following     | No Exercise      | Non Alcoholic | Regular      | Poor         |
| Not Following | Regular Exercise | Occasionally  | Regular      | Poor         |
| Not Following | No Exercise      | Occasionally  | Occasionally | Middle Class |
| Following     | Occasionally     | Occasionally  | Regular      | Poor         |
| Not Following | Regular Exercise | Non Alcoholic | Occasionally | Poor         |

|               |                  |               |              |              |
|---------------|------------------|---------------|--------------|--------------|
| Following     | No Exercise      | Non Alcoholic | Regular      | Middle Class |
| Not Following | Regular Exercise | Non Alcoholic | Regular      | Poor         |
| Following     | Regular Exercise | Non Alcoholic | Occasionally | Poor         |
| Not Following | No Exercise      | Non Alcoholic | Regular      | Middle Class |
| Not Following | Regular Exercise | Non Alcoholic | Regular      | Middle Class |
| Not Following | No Exercise      | Alcoholic     | Regular      | Middle Class |
| Not Following | Regular Exercise | Non Alcoholic | Occasionally | Middle Class |
| Following     | Occasionally     | Non Alcoholic | Regular      | Poor         |
| Not Following | Regular Exercise | Non Alcoholic | Regular      | Poor         |
| Not Following | No Exercise      | Occasionally  | Regular      | Poor         |
| Not Following | Regular Exercise | Occasionally  | Regular      | High Class   |
| Not Following | No Exercise      | Occasionally  | Occasionally | High Class   |
| Following     | Regular Exercise | Non Alcoholic | Non Smoker   | High Class   |
| Following     | Occasionally     | Non Alcoholic | Regular      | High Class   |
| Following     | Regular Exercise | Occasionally  | Occasionally | High Class   |
| Not Following | No Exercise      | Non Alcoholic | Regular      | Poor         |
| Following     | Regular Exercise | Non Alcoholic | Occasionally | Poor         |
| Not Following | No Exercise      | Occasionally  | Regular      | High Class   |
| Following     | Occasionally     | Non Alcoholic | Regular      | High Class   |
| Not Following | Regular Exercise | Non Alcoholic | Occasionally | High Class   |
| Not Following | No Exercise      | Non Alcoholic | Regular      | High Class   |
| Following     | No Exercise      | Non Alcoholic | Regular      | Middle Class |
| Not Following | Regular Exercise | Non Alcoholic | Regular      | Middle Class |
| Following     | Regular Exercise | Non Alcoholic | Occasionally | Middle Class |
| Not Following | Regular Exercise | Non Alcoholic | Regular      | Middle Class |
| Not Following | Regular Exercise | Non Alcoholic | Regular      | High Class   |
| Following     | Regular Exercise | Occasionally  | Regular      | Middle Class |
| Not Following | Occasionally     | Non Alcoholic | Regular      | Middle Class |
| Following     | Occasionally     | Non Alcoholic | Occasionally | High Class   |
| Not Following | Occasionally     | Non Alcoholic | Regular      | Middle Class |
| Occasionally  | Regular Exercise | Non Alcoholic | Regular      | Middle Class |
| Occasionally  | Occasionally     | Non Alcoholic | Occasionally | Poor         |
| Following     | Occasionally     | Non Alcoholic | Regular      | Poor         |
| Occasionally  | Regular Exercise | Occasionally  | Non Smoker   | High Class   |
| Following     | No Exercise      | Non Alcoholic | Regular      | High Class   |
| Occasionally  | No Exercise      | Non Alcoholic | Regular      | High Class   |
| Following     | Regular Exercise | Non Alcoholic | Occasionally | High Class   |
| Occasionally  | Regular Exercise | Non Alcoholic | Regular      | Poor         |
| Following     | Regular Exercise | Alcoholic     | Regular      | Poor         |
| Not Following | Regular Exercise | Non Alcoholic | Regular      | Poor         |
| Not Following | Regular Exercise | Occasionally  | Occasionally | High Class   |
| Not Following | No Exercise      | Non Alcoholic | Regular      | High Class   |
| Not Following | Regular Exercise | Non Alcoholic | Regular      | High Class   |
| Not Following | No Exercise      | Non Alcoholic | Regular      | High Class   |
| Not Following | Regular Exercise | Non Alcoholic | Regular      | High Class   |
| Following     | Regular Exercise | Non Alcoholic | Occasionally | Poor         |
| Not Following | No Exercise      | Non Alcoholic | Regular      | High Class   |

|               |                  |               |              |              |
|---------------|------------------|---------------|--------------|--------------|
| Following     | No Exercise      | Non Alcoholic | Regular      | Middle Class |
| Not Following | No Exercise      | Non Alcoholic | Occasionally | Middle Class |
| Not Following | Regular Exercise | Non Alcoholic | Regular      | Poor         |
| Not Following | No Exercise      | Occasionally  | Occasionally | Middle Class |
| Following     | Regular Exercise | Non Alcoholic | Regular      | Poor         |
| Following     | No Exercise      | Non Alcoholic | Regular      | Poor         |
| Occasionally  | Regular Exercise | Non Alcoholic | Occasionally | High Class   |
| Following     | No Exercise      | Non Alcoholic | Regular      | Poor         |
| Occasionally  | Regular Exercise | Non Alcoholic | Regular      | High Class   |
| Not Following | No Exercise      | Occasionally  | Regular      | Middle Class |
| Following     | Regular Exercise | Non Alcoholic | Occasionally | Poor         |
| Not Following | Regular Exercise | Non Alcoholic | Regular      | Poor         |
| Following     | Regular Exercise | Non Alcoholic | Regular      | High Class   |
| Following     | Regular Exercise | Non Alcoholic | Regular      | High Class   |
| Occasionally  | Regular Exercise | Non Alcoholic | Regular      | Middle Class |
| Occasionally  | Regular Exercise | Alcoholic     | Occasionally | High Class   |
| Occasionally  | No Exercise      | Non Alcoholic | Regular      | High Class   |
| Occasionally  | Regular Exercise | Non Alcoholic | Regular      | High Class   |
| Occasionally  | No Exercise      | Non Alcoholic | Occasionally | Poor         |
| Occasionally  | Regular Exercise | Non Alcoholic | Regular      | Middle Class |
| Occasionally  | No Exercise      | Non Alcoholic | Occasionally | Poor         |
| Occasionally  | Regular Exercise | Occasionally  | Regular      | Middle Class |
| Occasionally  | Regular Exercise | Non Alcoholic | Regular      | Poor         |
| Occasionally  | Regular Exercise | Non Alcoholic | Occasionally | Poor         |
| Occasionally  | Regular Exercise | Non Alcoholic | Regular      | Poor         |
| Occasionally  | No Exercise      | Non Alcoholic | Regular      | Middle Class |
| Not Following | No Exercise      | Non Alcoholic | Regular      | Middle Class |
| Following     | No Exercise      | Alcoholic     | Occasionally | Middle Class |
| Not Following | Regular Exercise | Non Alcoholic | Regular      | Middle Class |
| Not Following | No Exercise      | Non Alcoholic | Regular      | High Class   |
| Following     | Regular Exercise | Non Alcoholic | Regular      | High Class   |
| Occasionally  | Regular Exercise | Non Alcoholic | Regular      | High Class   |
| Not Following | Regular Exercise | Non Alcoholic | Occasionally | High Class   |
| Not Following | No Exercise      | Non Alcoholic | Regular      | High Class   |
| Occasionally  | No Exercise      | Non Alcoholic | Regular      | High Class   |
| Occasionally  | Regular Exercise | Occasionally  | Occasionally | High Class   |
| Not Following | No Exercise      | Alcoholic     | Non Smoker   | Middle Class |
| Occasionally  | No Exercise      | Non Alcoholic | Occasionally | Middle Class |
| Following     | Regular Exercise | Non Alcoholic | Regular      | Middle Class |
| Following     | Regular Exercise | Non Alcoholic | Regular      | High Class   |
| Not Following | No Exercise      | Non Alcoholic | Occasionally | High Class   |
| Following     | No Exercise      | Non Alcoholic | Regular      | High Class   |
| Following     | Regular Exercise | Non Alcoholic | Regular      | High Class   |
| Following     | No Exercise      | Non Alcoholic | Regular      | High Class   |
| Following     | Regular Exercise | Occasionally  | Occasionally | High Class   |
| Following     | No Exercise      | Non Alcoholic | Regular      | High Class   |
| Following     | Regular Exercise | Non Alcoholic | Regular      | Middle Class |

|               |                  |               |              |              |
|---------------|------------------|---------------|--------------|--------------|
| Following     | Regular Exercise | Non Alcoholic | Regular      | Middle Class |
| Following     | No Exercise      | Occasionally  | Regular      | Middle Class |
| Following     | No Exercise      | Non Alcoholic | Occasionally | High Class   |
| Following     | No Exercise      | Non Alcoholic | Regular      | High Class   |
| Following     | Regular Exercise | Non Alcoholic | Regular      | Middle Class |
| Not Following | No Exercise      | Non Alcoholic | Occasionally | High Class   |
| Not Following | Regular Exercise | Non Alcoholic | Regular      | Middle Class |
| Following     | No Exercise      | Non Alcoholic | Occasionally | High Class   |
| Not Following | Regular Exercise | Non Alcoholic | Regular      | Poor         |
| Following     | Occasionally     | Occasionally  | Regular      | Poor         |
| Following     | Regular Exercise | Non Alcoholic | Occasionally | Poor         |
| Following     | No Exercise      | Non Alcoholic | Regular      | Poor         |
| Not Following | No Exercise      | Non Alcoholic | Regular      | Poor         |
| Following     | Regular Exercise | Non Alcoholic | Regular      | Poor         |
| Not Following | Regular Exercise | Non Alcoholic | Occasionally | Middle Class |
| Following     | Regular Exercise | Non Alcoholic | Regular      | Middle Class |
| Following     | Regular Exercise | Occasionally  | Regular      | Middle Class |
| Not Following | Occasionally     | Non Alcoholic | Regular      | Middle Class |
| Not Following | No Exercise      | Occasionally  | Non Smoker   | High Class   |
| Not Following | Regular Exercise | Non Alcoholic | Occasionally | Poor         |
| Following     | Regular Exercise | Non Alcoholic | Regular      | Poor         |
| Following     | Regular Exercise | Non Alcoholic | Regular      | High Class   |
| Following     | No Exercise      | Non Alcoholic | Occasionally | Middle Class |
| Not Following | Regular Exercise | Non Alcoholic | Regular      | Middle Class |
| Not Following | Regular Exercise | Non Alcoholic | Occasionally | Middle Class |
| Following     | Regular Exercise | Non Alcoholic | Regular      | High Class   |
| Following     | Occasionally     | Non Alcoholic | Regular      | High Class   |
| Not Following | No Exercise      | Alcoholic     | Occasionally | High Class   |
| Not Following | No Exercise      | Non Alcoholic | Regular      | Poor         |
| Not Following | No Exercise      | Non Alcoholic | Regular      | Poor         |
| Not Following | Regular Exercise | Non Alcoholic | Regular      | Poor         |
| Occasionally  | No Exercise      | Non Alcoholic | Occasionally | High Class   |
| Occasionally  | Regular Exercise | Non Alcoholic | Regular      | Poor         |
| Not Following | No Exercise      | Non Alcoholic | Regular      | Poor         |
| Not Following | Regular Exercise | Occasionally  | Regular      | Middle Class |
| Not Following | No Exercise      | Non Alcoholic | Regular      | High Class   |
| Occasionally  | Regular Exercise | Non Alcoholic | Occasionally | High Class   |
| Not Following | Occasionally     | Non Alcoholic | Regular      | Poor         |
| Not Following | Regular Exercise | Alcoholic     | Regular      | High Class   |
| Following     | No Exercise      | Non Alcoholic | Non Smoker   | High Class   |
| Following     | Regular Exercise | Non Alcoholic | Regular      | High Class   |
| Not Following | Regular Exercise | Non Alcoholic | Occasionally | Middle Class |
| Not Following | No Exercise      | Non Alcoholic | Regular      | High Class   |
| Following     | No Exercise      | Non Alcoholic | Regular      | Poor         |
| Not Following | Regular Exercise | Non Alcoholic | Occasionally | High Class   |
| Not Following | No Exercise      | Non Alcoholic | Regular      | Poor         |
| Not Following | Regular Exercise | Non Alcoholic | Regular      | Poor         |



|               |                  |               |              |              |
|---------------|------------------|---------------|--------------|--------------|
| Following     | No Exercise      | Non Alcoholic | Regular      | High Class   |
| Following     | Regular Exercise | Non Alcoholic | Occasionally | Poor         |
| Following     | Regular Exercise | Non Alcoholic | Regular      | Poor         |
| Not Following | Regular Exercise | Occasionally  | Regular      | High Class   |
| Not Following | No Exercise      | Non Alcoholic | Regular      | Middle Class |
| Occasionally  | Regular Exercise | Non Alcoholic | Regular      | High Class   |
| Following     | No Exercise      | Non Alcoholic | Occasionally | Middle Class |
| Occasionally  | No Exercise      | Non Alcoholic | Regular      | Middle Class |
| Occasionally  | Regular Exercise | Non Alcoholic | Regular      | High Class   |
| Following     | No Exercise      | Non Alcoholic | Occasionally | High Class   |
| Not Following | No Exercise      | Non Alcoholic | Regular      | Poor         |
| Not Following | Regular Exercise | Non Alcoholic | Occasionally | Poor         |
| Following     | Regular Exercise | Non Alcoholic | Regular      | Poor         |
| Not Following | No Exercise      | Non Alcoholic | Regular      | Middle Class |
| Not Following | Regular Exercise | Non Alcoholic | Occasionally | High Class   |
| Not Following | Regular Exercise | Non Alcoholic | Regular      | High Class   |
| Not Following | No Exercise      | Non Alcoholic | Regular      | High Class   |
| Not Following | Regular Exercise | Non Alcoholic | Regular      | Poor         |
| Not Following | No Exercise      | Non Alcoholic | Occasionally | Poor         |
| Occasionally  | Regular Exercise | Non Alcoholic | Regular      | Poor         |
| Occasionally  | Regular Exercise | Non Alcoholic | Regular      | High Class   |
| Occasionally  | No Exercise      | Non Alcoholic | Regular      | Poor         |
| Occasionally  | Regular Exercise | Alcoholic     | Regular      | Poor         |
| Not Following | Regular Exercise | Non Alcoholic | Occasionally | High Class   |
| Not Following | Regular Exercise | Non Alcoholic | Regular      | Middle Class |
| Not Following | No Exercise      | Occasionally  | Regular      | Middle Class |
| Not Following | Regular Exercise | Occasionally  | Occasionally | High Class   |
| Not Following | No Exercise      | Non Alcoholic | Regular      | High Class   |
| Occasionally  | Regular Exercise | Non Alcoholic | Occasionally | Poor         |
| Not Following | No Exercise      | Non Alcoholic | Regular      | Poor         |
| Following     | Regular Exercise | Non Alcoholic | Regular      | Poor         |
| Following     | No Exercise      | Non Alcoholic | Occasionally | Middle Class |
| Following     | Regular Exercise | Non Alcoholic | Regular      | High Class   |
| Following     | Regular Exercise | Non Alcoholic | Regular      | High Class   |
| Not Following | Regular Exercise | Non Alcoholic | Regular      | Middle Class |
| Occasionally  | Regular Exercise | Non Alcoholic | Occasionally | Middle Class |
| Occasionally  | Regular Exercise | Non Alcoholic | Regular      | Middle Class |
| Occasionally  | Regular Exercise | Non Alcoholic | Regular      | High Class   |
| Occasionally  | No Exercise      | Alcoholic     | Regular      | Poor         |
| Following     | Regular Exercise | Non Alcoholic | Regular      | Middle Class |
| Not Following | Regular Exercise | Non Alcoholic | Occasionally | Poor         |
| Following     | Regular Exercise | Non Alcoholic | Regular      | Poor         |
| Following     | No Exercise      | Non Alcoholic | Non Smoker   | Poor         |
| Not Following | Regular Exercise | Non Alcoholic | Occasionally | Poor         |
| Not Following | Regular Exercise | Non Alcoholic | Regular      | Poor         |
| Not Following | Regular Exercise | Non Alcoholic | Occasionally | High Class   |
| Not Following | Regular Exercise | Occasionally  | Regular      | Middle Class |

|               |                  |               |              |              |
|---------------|------------------|---------------|--------------|--------------|
| Not Following | No Exercise      | Non Alcoholic | Regular      | High Class   |
| Not Following | No Exercise      | Non Alcoholic | Occasionally | Middle Class |
| Not Following | No Exercise      | Non Alcoholic | Regular      | High Class   |
| Not Following | Regular Exercise | Non Alcoholic | Regular      | Poor         |
| Following     | No Exercise      | Non Alcoholic | Regular      | Middle Class |
| Following     | Regular Exercise | Non Alcoholic | Occasionally | Poor         |
| Following     | No Exercise      | Non Alcoholic | Regular      | Middle Class |
| Following     | Regular Exercise | Non Alcoholic | Regular      | Poor         |
| Not Following | No Exercise      | Non Alcoholic | Regular      | Poor         |
| Following     | Occasionally     | Non Alcoholic | Regular      | Poor         |
| Following     | Regular Exercise | Occasionally  | Occasionally | High Class   |
| Not Following | No Exercise      | Non Alcoholic | Regular      | High Class   |
| Not Following | No Exercise      | Occasionally  | Regular      | High Class   |
| Not Following | Regular Exercise | Non Alcoholic | Occasionally | High Class   |
| Not Following | Regular Exercise | Non Alcoholic | Regular      | High Class   |
| Not Following | No Exercise      | Non Alcoholic | Occasionally | Middle Class |
| Following     | No Exercise      | Non Alcoholic | Regular      | Poor         |
| Following     | Occasionally     | Occasionally  | Regular      | High Class   |
| Following     | No Exercise      | Non Alcoholic | Occasionally | High Class   |
| Following     | Regular Exercise | Non Alcoholic | Regular      | Middle Class |
| Following     | No Exercise      | Non Alcoholic | Regular      | High Class   |
| Not Following | Regular Exercise | Non Alcoholic | Regular      | High Class   |
| Following     | Regular Exercise | Non Alcoholic | Occasionally | Poor         |
| Occasionally  | No Exercise      | Non Alcoholic | Regular      | Poor         |
| Occasionally  | Occasionally     | Non Alcoholic | Non Smoker   | Middle Class |
| Occasionally  | No Exercise      | Non Alcoholic | Regular      | Middle Class |
| Occasionally  | Regular Exercise | Non Alcoholic | Regular      | Middle Class |
| Not Following | No Exercise      | Non Alcoholic | Occasionally | Middle Class |
| Following     | Regular Exercise | Occasionally  | Regular      | Middle Class |
| Following     | No Exercise      | Non Alcoholic | Regular      | High Class   |
| Following     | Regular Exercise | Non Alcoholic | Occasionally | High Class   |
| Following     | Occasionally     | Non Alcoholic | Regular      | Middle Class |
| Not Following | Regular Exercise | Non Alcoholic | Occasionally | Middle Class |
| Not Following | Occasionally     | Non Alcoholic | Regular      | High Class   |
| Not Following | No Exercise      | Non Alcoholic | Regular      | Poor         |
| Following     | Regular Exercise | Non Alcoholic | Occasionally | Poor         |
| Following     | Regular Exercise | Non Alcoholic | Regular      | High Class   |
| Following     | Regular Exercise | Non Alcoholic | Regular      | High Class   |
| Not Following | Regular Exercise | Occasionally  | Regular      | Poor         |
| Following     | Regular Exercise | Non Alcoholic | Occasionally | Poor         |
| Not Following | Regular Exercise | Non Alcoholic | Regular      | High Class   |
| Following     | Regular Exercise | Non Alcoholic | Regular      | Poor         |
| Following     | No Exercise      | Occasionally  | Occasionally | Middle Class |
| Not Following | Regular Exercise | Non Alcoholic | Regular      | Middle Class |
| Following     | No Exercise      | Non Alcoholic | Occasionally | Poor         |
| Following     | No Exercise      | Non Alcoholic | Regular      | Poor         |
| Following     | Regular Exercise | Non Alcoholic | Regular      | High Class   |

|               |                  |               |              |              |
|---------------|------------------|---------------|--------------|--------------|
| Not Following | No Exercise      | Non Alcoholic | Occasionally | Poor         |
| Following     | Regular Exercise | Non Alcoholic | Regular      | Poor         |
| Not Following | No Exercise      | Non Alcoholic | Regular      | Poor         |
| Not Following | No Exercise      | Non Alcoholic | Regular      | Middle Class |
| Following     | Regular Exercise | Non Alcoholic | Occasionally | High Class   |
| Following     | Regular Exercise | Non Alcoholic | Regular      | Poor         |
| Not Following | No Exercise      | Occasionally  | Regular      | High Class   |
| Following     | Regular Exercise | Non Alcoholic | Regular      | Middle Class |
| Not Following | Regular Exercise | Non Alcoholic | Regular      | Poor         |
| Not Following | No Exercise      | Non Alcoholic | Occasionally | High Class   |
| Following     | Regular Exercise | Non Alcoholic | Regular      | Poor         |
| Following     | Regular Exercise | Non Alcoholic | Regular      | High Class   |
| Not Following | No Exercise      | Non Alcoholic | Occasionally | Poor         |
| Following     | Regular Exercise | Occasionally  | Regular      | High Class   |
| Following     | No Exercise      | Non Alcoholic | Occasionally | Poor         |
| Following     | Regular Exercise | Non Alcoholic | Regular      | Middle Class |
| Following     | Regular Exercise | Non Alcoholic | Regular      | Middle Class |
| Following     | Regular Exercise | Non Alcoholic | Occasionally | Middle Class |
| Following     | Regular Exercise | Non Alcoholic | Regular      | Middle Class |
| Not Following | No Exercise      | Occasionally  | Regular      | Middle Class |
| Following     | Regular Exercise | Non Alcoholic | Regular      | Poor         |
| Not Following | No Exercise      | Non Alcoholic | Occasionally | High Class   |
| Not Following | Regular Exercise | Non Alcoholic | Regular      | Middle Class |
| Following     | No Exercise      | Non Alcoholic | Regular      | High Class   |
| Following     | Regular Exercise | Occasionally  | Regular      | Poor         |
| Not Following | Regular Exercise | Non Alcoholic | Regular      | High Class   |
| Not Following | Regular Exercise | Non Alcoholic | Non Smoker   | High Class   |
| Following     | Regular Exercise | Non Alcoholic | Regular      | High Class   |
| Not Following | No Exercise      | Non Alcoholic | Regular      | Poor         |
| Not Following | Regular Exercise | Non Alcoholic | Occasionally | High Class   |
| Not Following | No Exercise      | Non Alcoholic | Non Smoker   | Poor         |
| Not Following | Regular Exercise | Non Alcoholic | Occasionally | Poor         |
| Occasionally  | No Exercise      | Non Alcoholic | Regular      | High Class   |
| Occasionally  | Regular Exercise | Non Alcoholic | Regular      | Poor         |
| Occasionally  | Occasionally     | Non Alcoholic | Regular      | Middle Class |
| Not Following | Regular Exercise | Non Alcoholic | Regular      | High Class   |
| Occasionally  | No Exercise      | Non Alcoholic | Occasionally | High Class   |
| Occasionally  | Regular Exercise | Non Alcoholic | Regular      | Middle Class |
| Occasionally  | No Exercise      | Non Alcoholic | Regular      | High Class   |
| Occasionally  | Regular Exercise | Non Alcoholic | Non Smoker   | High Class   |
| Not Following | Regular Exercise | Alcoholic     | Occasionally | Middle Class |
| Occasionally  | Regular Exercise | Non Alcoholic | Regular      | High Class   |
| Occasionally  | Regular Exercise | Non Alcoholic | Regular      | Poor         |
| Following     | Occasionally     | Occasionally  | Regular      | High Class   |
| Not Following | Regular Exercise | Non Alcoholic | Regular      | High Class   |
| Not Following | Regular Exercise | Occasionally  | Occasionally | High Class   |
| Not Following | Regular Exercise | Non Alcoholic | Occasionally | Poor         |

|               |                  |               |              |              |
|---------------|------------------|---------------|--------------|--------------|
| Occasionally  | Regular Exercise | Non Alcoholic | Regular      | Poor         |
| Occasionally  | No Exercise      | Non Alcoholic | Non Smoker   | Middle Class |
| Occasionally  | Regular Exercise | Non Alcoholic | Occasionally | High Class   |
| Occasionally  | No Exercise      | Non Alcoholic | Regular      | High Class   |
| Occasionally  | No Exercise      | Occasionally  | Regular      | High Class   |
| Occasionally  | No Exercise      | Non Alcoholic | Regular      | Poor         |
| Occasionally  | Regular Exercise | Occasionally  | Occasionally | Poor         |
| Occasionally  | Regular Exercise | Occasionally  | Regular      | Poor         |
| Occasionally  | No Exercise      | Occasionally  | Regular      | High Class   |
| Occasionally  | Regular Exercise | Occasionally  | Occasionally | High Class   |
| Occasionally  | Regular Exercise | Non Alcoholic | Regular      | High Class   |
| Occasionally  | Regular Exercise | Non Alcoholic | Regular      | Middle Class |
| Not Following | No Exercise      | Non Alcoholic | Regular      | Poor         |
| Occasionally  | Regular Exercise | Non Alcoholic | Regular      | Middle Class |
| Not Following | No Exercise      | Non Alcoholic | Occasionally | Poor         |
| Not Following | No Exercise      | Occasionally  | Non Smoker   | Poor         |
| Not Following | No Exercise      | Non Alcoholic | Regular      | Poor         |
| Not Following | Occasionally     | Non Alcoholic | Occasionally | Poor         |
| Following     | No Exercise      | Non Alcoholic | Regular      | Poor         |
| Occasionally  | Regular Exercise | Non Alcoholic | Occasionally | High Class   |
| Occasionally  | Regular Exercise | Non Alcoholic | Regular      | Middle Class |
| Occasionally  | No Exercise      | Non Alcoholic | Regular      | High Class   |
| Not Following | No Exercise      | Non Alcoholic | Occasionally | Middle Class |
| Occasionally  | Regular Exercise | Non Alcoholic | Regular      | High Class   |
| Following     | No Exercise      | Occasionally  | Regular      | Poor         |
| Not Following | Regular Exercise | Occasionally  | Regular      | Middle Class |
| Not Following | No Exercise      | Non Alcoholic | Occasionally | Poor         |
| Not Following | Regular Exercise | Non Alcoholic | Regular      | Middle Class |
| Not Following | Occasionally     | Non Alcoholic | Regular      | Poor         |
| Occasionally  | Regular Exercise | Occasionally  | Non Smoker   | High Class   |
| Occasionally  | No Exercise      | Occasionally  | Regular      | High Class   |
| Occasionally  | Regular Exercise | Occasionally  | Occasionally | High Class   |
| Not Following | Regular Exercise | Non Alcoholic | Regular      | High Class   |
| Occasionally  | Occasionally     | Non Alcoholic | Occasionally | Middle Class |
| Occasionally  | Regular Exercise | Non Alcoholic | Regular      | High Class   |
| Occasionally  | No Exercise      | Non Alcoholic | Regular      | Middle Class |
| Occasionally  | Regular Exercise | Non Alcoholic | Occasionally | Poor         |
| Occasionally  | Regular Exercise | Non Alcoholic | Regular      | Middle Class |
| Occasionally  | Occasionally     | Non Alcoholic | Regular      | Middle Class |
| Occasionally  | Regular Exercise | Non Alcoholic | Non Smoker   | Middle Class |
| Occasionally  | No Exercise      | Non Alcoholic | Regular      | Middle Class |
| Following     | No Exercise      | Occasionally  | Occasionally | High Class   |
| Occasionally  | Regular Exercise | Non Alcoholic | Regular      | Poor         |
| Occasionally  | No Exercise      | Non Alcoholic | Regular      | High Class   |
| Following     | No Exercise      | Non Alcoholic | Regular      | High Class   |
| Following     | Occasionally     | Non Alcoholic | Regular      | Middle Class |
| Following     | No Exercise      | Occasionally  | Occasionally | Middle Class |

|               |                  |               |              |              |
|---------------|------------------|---------------|--------------|--------------|
| Following     | No Exercise      | Non Alcoholic | Regular      | Middle Class |
| Occasionally  | Occasionally     | Non Alcoholic | Regular      | Poor         |
| Occasionally  | Regular Exercise | Non Alcoholic | Occasionally | Poor         |
| Occasionally  | Occasionally     | Non Alcoholic | Occasionally | High Class   |
| Occasionally  | Regular Exercise | Non Alcoholic | Regular      | Middle Class |
| Occasionally  | Regular Exercise | Non Alcoholic | Regular      | Middle Class |
| Occasionally  | No Exercise      | Non Alcoholic | Regular      | High Class   |
| Following     | Regular Exercise | Non Alcoholic | Occasionally | Middle Class |
| Following     | Regular Exercise | Non Alcoholic | Non Smoker   | Middle Class |
| Occasionally  | No Exercise      | Non Alcoholic | Regular      | High Class   |
| Following     | No Exercise      | Non Alcoholic | Regular      | Poor         |
| Following     | No Exercise      | Non Alcoholic | Regular      | Poor         |
| Following     | Occasionally     | Non Alcoholic | Regular      | Middle Class |
| Occasionally  | No Exercise      | Non Alcoholic | Occasionally | High Class   |
| Occasionally  | Occasionally     | Non Alcoholic | Regular      | Poor         |
| Following     | No Exercise      | Non Alcoholic | Regular      | High Class   |
| Not Following | Regular Exercise | Alcoholic     | Regular      | Middle Class |
| Following     | Regular Exercise | Non Alcoholic | Non Smoker   | Poor         |
| Following     | Regular Exercise | Non Alcoholic | Occasionally | High Class   |
| Not Following | Regular Exercise | Occasionally  | Regular      | Poor         |
| Following     | No Exercise      | Non Alcoholic | Regular      | High Class   |
| Not Following | Regular Exercise | Non Alcoholic | Occasionally | Poor         |
| Following     | No Exercise      | Occasionally  | Regular      | High Class   |
| Occasionally  | Regular Exercise | Non Alcoholic | Occasionally | Poor         |
| Following     | No Exercise      | Non Alcoholic | Regular      | Middle Class |
| Occasionally  | Regular Exercise | Non Alcoholic | Regular      | Middle Class |
| Following     | No Exercise      | Non Alcoholic | Occasionally | Middle Class |
| Following     | Regular Exercise | Non Alcoholic | Regular      | Middle Class |
| Following     | No Exercise      | Non Alcoholic | Regular      | Middle Class |
| Following     | No Exercise      | Non Alcoholic | Occasionally | High Class   |
| Following     | No Exercise      | Non Alcoholic | Regular      | Poor         |
| Following     | Regular Exercise | Non Alcoholic | Occasionally | High Class   |
| Following     | Regular Exercise | Occasionally  | Regular      | High Class   |
| Following     | Regular Exercise | Occasionally  | Occasionally | High Class   |
| Following     | Regular Exercise | Alcoholic     | Regular      | High Class   |
| Occasionally  | No Exercise      | Non Alcoholic | Regular      | Middle Class |
| Occasionally  | No Exercise      | Non Alcoholic | Regular      | High Class   |
| Occasionally  | No Exercise      | Non Alcoholic | Occasionally | High Class   |
| Occasionally  | Regular Exercise | Alcoholic     | Regular      | Poor         |
| Occasionally  | Regular Exercise | Non Alcoholic | Regular      | High Class   |
| Occasionally  | Regular Exercise | Non Alcoholic | Regular      | Poor         |
| Occasionally  | No Exercise      | Non Alcoholic | Regular      | High Class   |
| Occasionally  | Regular Exercise | Non Alcoholic | Non Smoker   | Poor         |
| Following     | Regular Exercise | Non Alcoholic | Non Smoker   | Poor         |
| Occasionally  | Regular Exercise | Non Alcoholic | Regular      | High Class   |
| Occasionally  | No Exercise      | Non Alcoholic | Regular      | High Class   |
| Occasionally  | Regular Exercise | Alcoholic     | Occasionally | High Class   |

|               |                  |               |              |              |
|---------------|------------------|---------------|--------------|--------------|
| Occasionally  | No Exercise      | Alcoholic     | Occasionally | High Class   |
| Occasionally  | Regular Exercise | Alcoholic     | Regular      | Poor         |
| Following     | Regular Exercise | Non Alcoholic | Regular      | Middle Class |
| Occasionally  | No Exercise      | Alcoholic     | Occasionally | Poor         |
| Occasionally  | No Exercise      | Alcoholic     | Regular      | High Class   |
| Occasionally  | No Exercise      | Non Alcoholic | Occasionally | Poor         |
| Following     | No Exercise      | Non Alcoholic | Regular      | Poor         |
| Not Following | Regular Exercise | Non Alcoholic | Occasionally | Middle Class |
| Not Following | Regular Exercise | Occasionally  | Regular      | High Class   |
| Not Following | No Exercise      | Non Alcoholic | Occasionally | Poor         |
| Not Following | Regular Exercise | Non Alcoholic | Regular      | High Class   |
| Not Following | Regular Exercise | Non Alcoholic | Occasionally | High Class   |
| Occasionally  | Regular Exercise | Non Alcoholic | Regular      | High Class   |
| Occasionally  | No Exercise      | Non Alcoholic | Occasionally | High Class   |
| Occasionally  | Regular Exercise | Non Alcoholic | Regular      | High Class   |
| Not Following | No Exercise      | Non Alcoholic | Regular      | High Class   |
| Occasionally  | No Exercise      | Non Alcoholic | Regular      | High Class   |
| Not Following | No Exercise      | Alcoholic     | Non Smoker   | High Class   |
| Following     | No Exercise      | Alcoholic     | Regular      | High Class   |
| Not Following | Regular Exercise | Occasionally  | Occasionally | High Class   |
| Not Following | Regular Exercise | Non Alcoholic | Regular      | High Class   |
| Not Following | Regular Exercise | Occasionally  | Occasionally | Middle Class |
| Not Following | Regular Exercise | Non Alcoholic | Regular      | High Class   |
| Not Following | Regular Exercise | Non Alcoholic | Regular      | High Class   |
| Not Following | Regular Exercise | Non Alcoholic | Regular      | High Class   |
| Not Following | Regular Exercise | Non Alcoholic | Regular      | High Class   |
| Not Following | Occasionally     | Non Alcoholic | Occasionally | Middle Class |
| Not Following | Regular Exercise | Alcoholic     | Regular      | Middle Class |
| Not Following | No Exercise      | Non Alcoholic | Occasionally | Middle Class |
| Not Following | No Exercise      | Occasionally  | Regular      | Poor         |
| Following     | Regular Exercise | Occasionally  | Regular      | Poor         |
| Following     | Regular Exercise | Alcoholic     | Regular      | High Class   |
| Not Following | No Exercise      | Non Alcoholic | Regular      | High Class   |
| Not Following | Occasionally     | Occasionally  | Non Smoker   | High Class   |
| Not Following | Regular Exercise | Non Alcoholic | Regular      | High Class   |
| Not Following | Regular Exercise | Occasionally  | Regular      | Middle Class |
| Following     | No Exercise      | Non Alcoholic | Occasionally | Middle Class |
| Following     | Regular Exercise | Non Alcoholic | Regular      | Middle Class |
| Not Following | No Exercise      | Non Alcoholic | Occasionally | High Class   |
| Not Following | Regular Exercise | Non Alcoholic | Regular      | High Class   |
| Not Following | Regular Exercise | Non Alcoholic | Regular      | High Class   |
| Not Following | Regular Exercise | Non Alcoholic | Regular      | High Class   |
| Not Following | Regular Exercise | Alcoholic     | Occasionally | High Class   |
| Not Following | Regular Exercise | Occasionally  | Regular      | High Class   |
| Occasionally  | No Exercise      | Occasionally  | Regular      | Middle Class |
| Not Following | Regular Exercise | Non Alcoholic | Regular      | Poor         |
| Not Following | No Exercise      | Non Alcoholic | Regular      | Poor         |
| Not Following | Regular Exercise | Non Alcoholic | Occasionally | Poor         |

|               |                  |               |              |              |
|---------------|------------------|---------------|--------------|--------------|
| Occasionally  | Regular Exercise | Non Alcoholic | Regular      | High Class   |
| Occasionally  | Occasionally     | Non Alcoholic | Regular      | High Class   |
| Occasionally  | Regular Exercise | Occasionally  | Non Smoker   | Middle Class |
| Occasionally  | Regular Exercise | Non Alcoholic | Regular      | Middle Class |
| Occasionally  | Occasionally     | Non Alcoholic | Occasionally | Middle Class |
| Occasionally  | Regular Exercise | Non Alcoholic | Regular      | Middle Class |
| Occasionally  | No Exercise      | Alcoholic     | Regular      | Middle Class |
| Occasionally  | Regular Exercise | Non Alcoholic | Occasionally | Poor         |
| Occasionally  | Regular Exercise | Non Alcoholic | Regular      | Middle Class |
| Occasionally  | Regular Exercise | Occasionally  | Regular      | Poor         |
| Occasionally  | Regular Exercise | Non Alcoholic | Regular      | Middle Class |
| Occasionally  | Regular Exercise | Non Alcoholic | Regular      | Middle Class |
| Occasionally  | No Exercise      | Alcoholic     | Occasionally | Middle Class |
| Occasionally  | Regular Exercise | Occasionally  | Regular      | Middle Class |
| Occasionally  | Regular Exercise | Non Alcoholic | Non Smoker   | Poor         |
| Occasionally  | No Exercise      | Occasionally  | Occasionally | Poor         |
| Occasionally  | Occasionally     | Occasionally  | Regular      | Poor         |
| Occasionally  | Regular Exercise | Non Alcoholic | Regular      | High Class   |
| Not Following | Regular Exercise | Non Alcoholic | Occasionally | High Class   |
| Not Following | Regular Exercise | Occasionally  | Regular      | High Class   |
| Not Following | Regular Exercise | Non Alcoholic | Occasionally | Middle Class |
| Not Following | No Exercise      | Non Alcoholic | Regular      | High Class   |
| Not Following | Occasionally     | Non Alcoholic | Regular      | High Class   |
| Not Following | No Exercise      | Non Alcoholic | Occasionally | Poor         |
| Not Following | Regular Exercise | Non Alcoholic | Regular      | Middle Class |
| Not Following | Regular Exercise | Non Alcoholic | Regular      | Middle Class |
| Not Following | Occasionally     | Occasionally  | Regular      | Middle Class |
| Not Following | Regular Exercise | Non Alcoholic | Non Smoker   | Middle Class |
| Not Following | Occasionally     | Non Alcoholic | Occasionally | High Class   |
| Not Following | Regular Exercise | Non Alcoholic | Regular      | Middle Class |
| Occasionally  | Occasionally     | Alcoholic     | Occasionally | Poor         |
| Not Following | Occasionally     | Non Alcoholic | Occasionally | Middle Class |
| Following     | Regular Exercise | Occasionally  | Occasionally | High Class   |
| Following     | Regular Exercise | Non Alcoholic | Regular      | Middle Class |
| Occasionally  | Regular Exercise | Occasionally  | Regular      | Middle Class |
| Not Following | Occasionally     | Non Alcoholic | Regular      | High Class   |
| Following     | Regular Exercise | Non Alcoholic | Non Smoker   | High Class   |
| Following     | Regular Exercise | Non Alcoholic | Occasionally | Poor         |
| Following     | Regular Exercise | Occasionally  | Occasionally | Poor         |
| Occasionally  | No Exercise      | Non Alcoholic | Regular      | Middle Class |
| Following     | No Exercise      | Non Alcoholic | Regular      | High Class   |
| Occasionally  | Regular Exercise | Occasionally  | Regular      | High Class   |
| Occasionally  | Occasionally     | Occasionally  | Regular      | Middle Class |
| Occasionally  | Regular Exercise | Non Alcoholic | Occasionally | Middle Class |
| Occasionally  | Regular Exercise | Occasionally  | Regular      | High Class   |
| Occasionally  | Regular Exercise | Non Alcoholic | Occasionally | High Class   |
| Occasionally  | Regular Exercise | Alcoholic     | Regular      | Poor         |

|               |                  |               |              |              |
|---------------|------------------|---------------|--------------|--------------|
| Occasionally  | Regular Exercise | Non Alcoholic | Occasionally | Poor         |
| Occasionally  | Occasionally     | Occasionally  | Occasionally | Poor         |
| Occasionally  | Regular Exercise | Non Alcoholic | Occasionally | High Class   |
| Following     | No Exercise      | Non Alcoholic | Regular      | Middle Class |
| Occasionally  | No Exercise      | Alcoholic     | Regular      | Middle Class |
| Occasionally  | No Exercise      | Alcoholic     | Regular      | Poor         |
| Occasionally  | Regular Exercise | Non Alcoholic | Occasionally | Middle Class |
| Following     | Regular Exercise | Non Alcoholic | Non Smoker   | Middle Class |
| Occasionally  | No Exercise      | Non Alcoholic | Non Smoker   | Middle Class |
| Following     | Occasionally     | Non Alcoholic | Non Smoker   | Poor         |
| Occasionally  | No Exercise      | Occasionally  | Non Smoker   | Middle Class |
| Occasionally  | No Exercise      | Alcoholic     | Regular      | Middle Class |
| Occasionally  | Regular Exercise | Occasionally  | Regular      | Middle Class |
| Not Following | No Exercise      | Occasionally  | Non Smoker   | High Class   |
| Not Following | No Exercise      | Alcoholic     | Occasionally | High Class   |
| Following     | Regular Exercise | Non Alcoholic | Occasionally | High Class   |
| Occasionally  | Regular Exercise | Alcoholic     | Regular      | Poor         |
| Occasionally  | Regular Exercise | Non Alcoholic | Non Smoker   | Poor         |
| Occasionally  | Regular Exercise | Non Alcoholic | Occasionally | Middle Class |
| Occasionally  | Regular Exercise | Occasionally  | Regular      | High Class   |
| Not Following | Regular Exercise | Alcoholic     | Regular      | High Class   |
| Not Following | Regular Exercise | Non Alcoholic | Non Smoker   | Middle Class |
| Occasionally  | Occasionally     | Occasionally  | Occasionally | High Class   |
| Occasionally  | Regular Exercise | Alcoholic     | Regular      | Poor         |
| Occasionally  | Regular Exercise | Alcoholic     | Regular      | Poor         |
| Following     | Regular Exercise | Non Alcoholic | Occasionally | High Class   |
| Following     | Regular Exercise | Non Alcoholic | Regular      | Poor         |
| Not Following | Regular Exercise | Non Alcoholic | Occasionally | High Class   |
| Following     | Regular Exercise | Occasionally  | Regular      | Middle Class |
| Not Following | Regular Exercise | Occasionally  | Regular      | High Class   |
| Not Following | Regular Exercise | Non Alcoholic | Regular      | Middle Class |
| Following     | Regular Exercise | Non Alcoholic | Regular      | Middle Class |
| Occasionally  | Occasionally     | Alcoholic     | Occasionally | High Class   |
| Occasionally  | Regular Exercise | Non Alcoholic | Non Smoker   | High Class   |
| Following     | Regular Exercise | Occasionally  | Regular      | Poor         |
| Following     | Occasionally     | Occasionally  | Occasionally | Poor         |
| Occasionally  | Regular Exercise | Occasionally  | Regular      | Middle Class |
| Following     | Regular Exercise | Non Alcoholic | Regular      | High Class   |
| Not Following | Occasionally     | Occasionally  | Regular      | Poor         |
| Not Following | Regular Exercise | Alcoholic     | Non Smoker   | High Class   |
| Not Following | Regular Exercise | Occasionally  | Non Smoker   | Poor         |
| Occasionally  | Occasionally     | Occasionally  | Occasionally | Poor         |
| Following     | Regular Exercise | Alcoholic     | Regular      | High Class   |
| Following     | Regular Exercise | Non Alcoholic | Occasionally | Middle Class |
| Occasionally  | Occasionally     | Non Alcoholic | Regular      | Poor         |
| Occasionally  | Occasionally     | Non Alcoholic | Occasionally | Poor         |
| Following     | Regular Exercise | Alcoholic     | Regular      | Poor         |



|               |                  |               |              |              |
|---------------|------------------|---------------|--------------|--------------|
| Following     | Regular Exercise | Alcoholic     | Occasionally | High Class   |
| Occasionally  | No Exercise      | Non Alcoholic | Regular      | Middle Class |
| Occasionally  | Occasionally     | Occasionally  | Regular      | Middle Class |
| Following     | No Exercise      | Alcoholic     | Non Smoker   | High Class   |
| Following     | Occasionally     | Occasionally  | Occasionally | Poor         |
| Following     | Occasionally     | Alcoholic     | Regular      | Poor         |
| Following     | Regular Exercise | Non Alcoholic | Occasionally | Poor         |
| Occasionally  | Regular Exercise | Alcoholic     | Occasionally | Poor         |
| Occasionally  | Regular Exercise | Alcoholic     | Occasionally | High Class   |
| Following     | Regular Exercise | Occasionally  | Regular      | Middle Class |
| Following     | Regular Exercise | Non Alcoholic | Non Smoker   | High Class   |
| Following     | Occasionally     | Alcoholic     | Occasionally | Middle Class |
| Not Following | Regular Exercise | Occasionally  | Occasionally | Middle Class |
| Following     | Regular Exercise | Non Alcoholic | Non Smoker   | Poor         |
| Following     | Regular Exercise | Non Alcoholic | Occasionally | Poor         |
| Following     | Regular Exercise | Occasionally  | Occasionally | Poor         |
| Not Following | Occasionally     | Alcoholic     | Regular      | High Class   |
| Following     | Occasionally     | Occasionally  | Occasionally | High Class   |
| Following     | Occasionally     | Non Alcoholic | Regular      | Middle Class |
| Following     | Regular Exercise | Alcoholic     | Occasionally | Poor         |
| Following     | Occasionally     | Occasionally  | Regular      | Middle Class |
| Following     | Occasionally     | Non Alcoholic | Occasionally | High Class   |
| Following     | Regular Exercise | Alcoholic     | Regular      | High Class   |
| Occasionally  | Occasionally     | Occasionally  | Occasionally | Poor         |
| Following     | Occasionally     | Alcoholic     | Regular      | Middle Class |
| Occasionally  | No Exercise      | Non Alcoholic | Regular      | Middle Class |
| Occasionally  | Regular Exercise | Non Alcoholic | Regular      | Middle Class |
| Occasionally  | Occasionally     | Alcoholic     | Occasionally | Middle Class |
| Not Following | Occasionally     | Non Alcoholic | Occasionally | Middle Class |
| Not Following | No Exercise      | Occasionally  | Regular      | High Class   |
| Following     | Regular Exercise | Occasionally  | Occasionally | Middle Class |
| Following     | Regular Exercise | Occasionally  | Occasionally | Middle Class |
| Following     | Regular Exercise | Non Alcoholic | Regular      | Poor         |
| Not Following | Occasionally     | Occasionally  | Occasionally | Poor         |
| Occasionally  | Regular Exercise | Occasionally  | Regular      | High Class   |
| Not Following | Occasionally     | Non Alcoholic | Regular      | High Class   |
| Not Following | No Exercise      | Non Alcoholic | Non Smoker   | High Class   |
| Following     | Regular Exercise | Non Alcoholic | Non Smoker   | High Class   |
| Following     | Regular Exercise | Non Alcoholic | Occasionally | Poor         |
| Following     | Regular Exercise | Non Alcoholic | Non Smoker   | Poor         |
| Following     | Regular Exercise | Non Alcoholic | Occasionally | Poor         |
| Following     | Regular Exercise | Occasionally  | Occasionally | High Class   |
| Not Following | No Exercise      | Non Alcoholic | Regular      | High Class   |
| Not Following | No Exercise      | Non Alcoholic | Regular      | High Class   |
| Following     | No Exercise      | Non Alcoholic | Regular      | High Class   |
| Following     | Occasionally     | Alcoholic     | Regular      | High Class   |
| Following     | No Exercise      | Non Alcoholic | Regular      | Poor         |

|               |                  |               |              |              |
|---------------|------------------|---------------|--------------|--------------|
| Following     | Regular Exercise | Occasionally  | Regular      | High Class   |
| Not Following | Occasionally     | Alcoholic     | Regular      | Middle Class |
| Not Following | Occasionally     | Occasionally  | Regular      | Middle Class |
| Following     | Regular Exercise | Non Alcoholic | Occasionally | Poor         |
| Following     | Occasionally     | Alcoholic     | Regular      | Middle Class |
| Not Following | Regular Exercise | Occasionally  | Regular      | Poor         |
| Following     | Regular Exercise | Non Alcoholic | Occasionally | Poor         |
| Following     | Regular Exercise | Alcoholic     | Regular      | High Class   |
| Following     | Regular Exercise | Non Alcoholic | Occasionally | Poor         |
| Occasionally  | Occasionally     | Occasionally  | Occasionally | High Class   |
| Not Following | No Exercise      | Non Alcoholic | Non Smoker   | Middle Class |
| Following     | Regular Exercise | Non Alcoholic | Occasionally | Poor         |
| Following     | Regular Exercise | Occasionally  | Regular      | Poor         |
| Following     | No Exercise      | Non Alcoholic | Regular      | High Class   |
| Not Following | No Exercise      | Alcoholic     | Regular      | High Class   |
| Following     | Regular Exercise | Non Alcoholic | Occasionally | Middle Class |
| Following     | Regular Exercise | Non Alcoholic | Non Smoker   | High Class   |
| Following     | Regular Exercise | Non Alcoholic | Non Smoker   | High Class   |
| Occasionally  | No Exercise      | Alcoholic     | Regular      | High Class   |
| Following     | Regular Exercise | Non Alcoholic | Regular      | Poor         |
| Following     | No Exercise      | Non Alcoholic | Occasionally | Middle Class |
| Occasionally  | No Exercise      | Non Alcoholic | Regular      | Poor         |
| Following     | Regular Exercise | Occasionally  | Regular      | Middle Class |
| Following     | Regular Exercise | Non Alcoholic | Occasionally | Poor         |
| Following     | Regular Exercise | Non Alcoholic | Non Smoker   | Poor         |
| Not Following | No Exercise      | Non Alcoholic | Non Smoker   | Poor         |
| Not Following | No Exercise      | Non Alcoholic | Non Smoker   | Middle Class |
| Not Following | Occasionally     | Alcoholic     | Regular      | Middle Class |
| Following     | Occasionally     | Non Alcoholic | Non Smoker   | Middle Class |
| Occasionally  | No Exercise      | Alcoholic     | Regular      | Middle Class |
| Following     | Regular Exercise | Alcoholic     | Regular      | High Class   |
| Following     | Occasionally     | Occasionally  | Occasionally | High Class   |
| Occasionally  | No Exercise      | Alcoholic     | Regular      | High Class   |
| Not Following | Regular Exercise | Alcoholic     | Occasionally | High Class   |
| Following     | Regular Exercise | Non Alcoholic | Non Smoker   | High Class   |
| Occasionally  | No Exercise      | Occasionally  | Non Smoker   | High Class   |
| Occasionally  | No Exercise      | Alcoholic     | Regular      | High Class   |
| Occasionally  | Regular Exercise | Occasionally  | Regular      | Middle Class |
| Not Following | No Exercise      | Occasionally  | Non Smoker   | Middle Class |
| Not Following | No Exercise      | Non Alcoholic | Non Smoker   | Middle Class |
| Not Following | No Exercise      | Alcoholic     | Occasionally | High Class   |
| Occasionally  | Occasionally     | Occasionally  | Occasionally | High Class   |
| Following     | Regular Exercise | Non Alcoholic | Occasionally | High Class   |
| Following     | Regular Exercise | Alcoholic     | Regular      | High Class   |
| Following     | Regular Exercise | Non Alcoholic | Non Smoker   | High Class   |
| Following     | Regular Exercise | Non Alcoholic | Occasionally | High Class   |
| Following     | Regular Exercise | Occasionally  | Regular      | High Class   |

|               |                  |               |              |              |
|---------------|------------------|---------------|--------------|--------------|
| Following     | Occasionally     | Non Alcoholic | Occasionally | Middle Class |
| Not Following | Regular Exercise | Non Alcoholic | Regular      | Middle Class |
| Following     | Regular Exercise | Non Alcoholic | Non Smoker   | Middle Class |
| Not Following | Regular Exercise | Alcoholic     | Regular      | High Class   |
| Following     | Regular Exercise | Non Alcoholic | Non Smoker   | High Class   |
| Not Following | Regular Exercise | Non Alcoholic | Non Smoker   | Middle Class |
| Following     | Occasionally     | Occasionally  | Occasionally | High Class   |
| Following     | Regular Exercise | Alcoholic     | Regular      | Middle Class |
| Not Following | Regular Exercise | Occasionally  | Non Smoker   | High Class   |
| Following     | Regular Exercise | Alcoholic     | Regular      | Poor         |
| Following     | Regular Exercise | Non Alcoholic | Regular      | Poor         |
| Following     | Regular Exercise | Non Alcoholic | Occasionally | Poor         |
| Following     | Regular Exercise | Alcoholic     | Regular      | Poor         |
| Following     | Regular Exercise | Non Alcoholic | Regular      | Poor         |
| Not Following | Regular Exercise | Non Alcoholic | Occasionally | Poor         |
| Following     | Regular Exercise | Occasionally  | Regular      | Middle Class |
| Not Following | Regular Exercise | Occasionally  | Regular      | Middle Class |
| Not Following | Regular Exercise | Non Alcoholic | Regular      | Middle Class |
| Following     | Regular Exercise | Non Alcoholic | Regular      | Middle Class |
| Occasionally  | Occasionally     | Alcoholic     | Occasionally | High Class   |
| Not Following | Regular Exercise | Non Alcoholic | Non Smoker   | Poor         |
| Following     | Regular Exercise | Occasionally  | Regular      | Poor         |
| Following     | Regular Exercise | Non Alcoholic | Non Smoker   | High Class   |
| Following     | Occasionally     | Occasionally  | Occasionally | Middle Class |
| Not Following | Regular Exercise | Occasionally  | Regular      | Middle Class |
| Occasionally  | Occasionally     | Alcoholic     | Occasionally | Middle Class |
| Not Following | No Exercise      | Non Alcoholic | Non Smoker   | High Class   |
| Following     | Regular Exercise | Non Alcoholic | Regular      | High Class   |
| Not Following | No Exercise      | Alcoholic     | Occasionally | High Class   |
| Not Following | Occasionally     | Occasionally  | Regular      | Poor         |
| Occasionally  | Occasionally     | Non Alcoholic | Non Smoker   | Poor         |
| Not Following | Regular Exercise | Alcoholic     | Non Smoker   | Poor         |
| Not Following | Regular Exercise | Occasionally  | Non Smoker   | High Class   |
| Occasionally  | Occasionally     | Occasionally  | Occasionally | Poor         |
| Following     | Regular Exercise | Alcoholic     | Regular      | Poor         |
| Following     | Regular Exercise | Non Alcoholic | Occasionally | Middle Class |
| Occasionally  | No Exercise      | Alcoholic     | Non Smoker   | High Class   |
| Following     | No Exercise      | Alcoholic     | Regular      | High Class   |
| Not Following | Occasionally     | Occasionally  | Occasionally | Poor         |
| Occasionally  | Occasionally     | Non Alcoholic | Regular      | High Class   |
| Occasionally  | Occasionally     | Non Alcoholic | Occasionally | High Class   |
| Following     | Regular Exercise | Alcoholic     | Regular      | High Class   |
| Following     | No Exercise      | Occasionally  | Non Smoker   | Middle Class |
| Following     | Regular Exercise | Alcoholic     | Occasionally | High Class   |
| Not Following | Occasionally     | Occasionally  | Regular      | Poor         |
| Occasionally  | Occasionally     | Non Alcoholic | Regular      | High Class   |
| Occasionally  | Occasionally     | Non Alcoholic | Occasionally | High Class   |
| Following     | Regular Exercise | Alcoholic     | Regular      | High Class   |
| Following     | No Exercise      | Occasionally  | Non Smoker   | Middle Class |
| Following     | Regular Exercise | Alcoholic     | Occasionally | High Class   |
| Not Following | Occasionally     | Occasionally  | Regular      | Poor         |
| Occasionally  | No Exercise      | Non Alcoholic | Regular      | High Class   |
| Occasionally  | Occasionally     | Occasionally  | Regular      | Poor         |

|               |                  |               |              |              |
|---------------|------------------|---------------|--------------|--------------|
| Following     | Regular Exercise | Alcoholic     | Regular      | Poor         |
| Following     | No Exercise      | Alcoholic     | Non Smoker   | High Class   |
| Following     | Occasionally     | Occasionally  | Occasionally | Poor         |
| Following     | Occasionally     | Occasionally  | Non Smoker   | Poor         |
| Occasionally  | Occasionally     | Occasionally  | Occasionally | High Class   |
| Following     | Occasionally     | Alcoholic     | Regular      | Middle Class |
| Following     | Regular Exercise | Non Alcoholic | Occasionally | High Class   |
| Following     | Regular Exercise | Alcoholic     | Occasionally | Middle Class |
| Following     | Regular Exercise | Non Alcoholic | Non Smoker   | Middle Class |
| Following     | Regular Exercise | Alcoholic     | Occasionally | High Class   |
| Following     | Regular Exercise | Occasionally  | Regular      | High Class   |
| Following     | Regular Exercise | Non Alcoholic | Non Smoker   | Poor         |
| Following     | Occasionally     | Alcoholic     | Occasionally | Poor         |
| Occasionally  | Regular Exercise | Occasionally  | Non Smoker   | Poor         |
| Not Following | No Exercise      | Occasionally  | Regular      | Middle Class |
| Following     | Occasionally     | Occasionally  | Occasionally | High Class   |
| Not Following | Regular Exercise | Occasionally  | Non Smoker   | High Class   |
| Not Following | Regular Exercise | Occasionally  | Occasionally | High Class   |
| Following     | Regular Exercise | Non Alcoholic | Non Smoker   | Poor         |
| Following     | Regular Exercise | Non Alcoholic | Occasionally | Poor         |
| Following     | Regular Exercise | Occasionally  | Occasionally | Poor         |
| Occasionally  | Occasionally     | Occasionally  | Non Smoker   | High Class   |
| Following     | Regular Exercise | Alcoholic     | Regular      | Poor         |
| Occasionally  | Regular Exercise | Occasionally  | Occasionally | Poor         |
| Not Following | Occasionally     | Alcoholic     | Regular      | High Class   |
| Following     | Occasionally     | Occasionally  | Occasionally | Middle Class |
| Following     | Occasionally     | Non Alcoholic | Regular      | Middle Class |
| Following     | Regular Exercise | Alcoholic     | Occasionally | High Class   |
| Following     | Regular Exercise | Non Alcoholic | Non Smoker   | High Class   |
| Not Following | Regular Exercise | Occasionally  | Regular      | Poor         |
| Following     | Occasionally     | Occasionally  | Regular      | Poor         |
| Following     | Occasionally     | Non Alcoholic | Occasionally | Poor         |
| Following     | Regular Exercise | Alcoholic     | Regular      | Middle Class |
| Occasionally  | Occasionally     | Occasionally  | Occasionally | High Class   |
| Not Following | Regular Exercise | Alcoholic     | Regular      | High Class   |
| Occasionally  | No Exercise      | Occasionally  | Regular      | Middle Class |
| Following     | Occasionally     | Alcoholic     | Regular      | Middle Class |
| Not Following | Regular Exercise | Alcoholic     | Regular      | Middle Class |
| Occasionally  | No Exercise      | Non Alcoholic | Regular      | High Class   |
| Occasionally  | Regular Exercise | Non Alcoholic | Regular      | Poor         |
| Occasionally  | Regular Exercise | Non Alcoholic | Regular      | Middle Class |
| Following     | No Exercise      | Alcoholic     | Occasionally | Poor         |
| Not Following | Occasionally     | Alcoholic     | Regular      | Poor         |
| Following     | Regular Exercise | Non Alcoholic | Occasionally | Poor         |
| Following     | Regular Exercise | Non Alcoholic | Non Smoker   | Poor         |
| Following     | Regular Exercise | Non Alcoholic | Non Smoker   | Poor         |
| Occasionally  | Regular Exercise | Occasionally  | Regular      | High Class   |

|               |                  |               |              |              |
|---------------|------------------|---------------|--------------|--------------|
| Following     | Occasionally     | Occasionally  | Regular      | Middle Class |
| Following     | Regular Exercise | Non Alcoholic | Non Smoker   | High Class   |
| Occasionally  | Occasionally     | Occasionally  | Occasionally | Middle Class |
| Following     | Regular Exercise | Non Alcoholic | Non Smoker   | High Class   |
| Not Following | No Exercise      | Alcoholic     | Non Smoker   | Poor         |
| Following     | Regular Exercise | Alcoholic     | Regular      | Middle Class |
| Not Following | Regular Exercise | Occasionally  | Regular      | Poor         |
| Not Following | Regular Exercise | Occasionally  | Regular      | Middle Class |
| Not Following | Occasionally     | Occasionally  | Occasionally | Poor         |
| Following     | Regular Exercise | Alcoholic     | Regular      | Poor         |
| Following     | No Exercise      | Occasionally  | Occasionally | Poor         |
| Following     | Regular Exercise | Occasionally  | Regular      | High Class   |
| Following     | Regular Exercise | Occasionally  | Non Smoker   | High Class   |
| Following     | Occasionally     | Non Alcoholic | Non Smoker   | High Class   |
| Following     | Regular Exercise | Occasionally  | Occasionally | High Class   |
| Following     | Regular Exercise | Non Alcoholic | Regular      | High Class   |
| Occasionally  | Occasionally     | Alcoholic     | Regular      | Middle Class |
| Not Following | No Exercise      | Non Alcoholic | Regular      | Poor         |
| Occasionally  | Occasionally     | Non Alcoholic | Non Smoker   | High Class   |
| Not Following | Regular Exercise | Occasionally  | Occasionally | High Class   |
| Following     | Regular Exercise | Occasionally  | Regular      | Middle Class |
| Occasionally  | Occasionally     | Occasionally  | Regular      | High Class   |
| Not Following | No Exercise      | Non Alcoholic | Non Smoker   | High Class   |
| Occasionally  | Regular Exercise | Non Alcoholic | Occasionally | Poor         |
| Following     | Regular Exercise | Non Alcoholic | Non Smoker   | Poor         |
| Occasionally  | Occasionally     | Occasionally  | Occasionally | Middle Class |
| Occasionally  | Occasionally     | Occasionally  | Occasionally | Middle Class |
| Following     | No Exercise      | Occasionally  | Regular      | Middle Class |
| Not Following | No Exercise      | Alcoholic     | Regular      | Middle Class |
| Not Following | Regular Exercise | Occasionally  | Regular      | Middle Class |
| Following     | Regular Exercise | Non Alcoholic | Regular      | High Class   |
| Not Following | No Exercise      | Occasionally  | Occasionally | High Class   |
| Following     | Regular Exercise | Non Alcoholic | Non Smoker   | Middle Class |
| Following     | Regular Exercise | Alcoholic     | Non Smoker   | Middle Class |
| Not Following | Occasionally     | Alcoholic     | Regular      | High Class   |
| Not Following | Regular Exercise | Occasionally  | Non Smoker   | Poor         |
| Following     | Regular Exercise | Occasionally  | Non Smoker   | Poor         |
| Following     | Regular Exercise | Non Alcoholic | Regular      | High Class   |
| Following     | Occasionally     | Occasionally  | Non Smoker   | High Class   |
| Not Following | No Exercise      | Alcoholic     | Occasionally | Poor         |
| Following     | Occasionally     | Alcoholic     | Regular      | Poor         |
| Not Following | Regular Exercise | Alcoholic     | Regular      | High Class   |
| Following     | Regular Exercise | Non Alcoholic | Regular      | Poor         |
| Following     | No Exercise      | Non Alcoholic | Occasionally | Middle Class |
| Following     | No Exercise      | Non Alcoholic | Non Smoker   | Middle Class |
| Occasionally  | Regular Exercise | Alcoholic     | Non Smoker   | Poor         |
| Not Following | Occasionally     | Occasionally  | Regular      | Poor         |

|               |                  |               |              |              |
|---------------|------------------|---------------|--------------|--------------|
| Not Following | Occasionally     | Non Alcoholic | Regular      | High Class   |
| Following     | Regular Exercise | Non Alcoholic | Regular      | Poor         |
| Not Following | No Exercise      | Alcoholic     | Regular      | Poor         |
| Following     | Regular Exercise | Occasionally  | Occasionally | Poor         |
| Not Following | Regular Exercise | Non Alcoholic | Non Smoker   | Middle Class |
| Following     | Regular Exercise | Non Alcoholic | Non Smoker   | High Class   |
| Not Following | No Exercise      | Occasionally  | Non Smoker   | Poor         |
| Not Following | Regular Exercise | Alcoholic     | Regular      | High Class   |
| Following     | Regular Exercise | Non Alcoholic | Occasionally | Middle Class |
| Following     | Occasionally     | Occasionally  | Occasionally | Poor         |
| Following     | Regular Exercise | Non Alcoholic | Occasionally | High Class   |
| Following     | No Exercise      | Alcoholic     | Occasionally | Poor         |
| Not Following | No Exercise      | Alcoholic     | Occasionally | High Class   |
| Occasionally  | No Exercise      | Alcoholic     | Regular      | Poor         |
| Not Following | Occasionally     | Non Alcoholic | Occasionally | High Class   |
| Occasionally  | Occasionally     | Alcoholic     | Regular      | Poor         |
| Not Following | No Exercise      | Alcoholic     | Regular      | Middle Class |
| Following     | Occasionally     | Non Alcoholic | Regular      | Middle Class |
| Not Following | Occasionally     | Alcoholic     | Regular      | Middle Class |
| Not Following | Occasionally     | Non Alcoholic | Regular      | Middle Class |
| Not Following | No Exercise      | Occasionally  | Regular      | Middle Class |
| Following     | Occasionally     | Non Alcoholic | Regular      | Poor         |
| Occasionally  | No Exercise      | Alcoholic     | Non Smoker   | High Class   |
| Occasionally  | Occasionally     | Alcoholic     | Regular      | Middle Class |
| Occasionally  | Occasionally     | Occasionally  | Occasionally | High Class   |
| Not Following | No Exercise      | Occasionally  | Regular      | Poor         |
| Not Following | Occasionally     | Non Alcoholic | Regular      | High Class   |
| Following     | Regular Exercise | Alcoholic     | Occasionally | High Class   |
| Following     | Regular Exercise | Occasionally  | Occasionally | High Class   |
| Following     | No Exercise      | Alcoholic     | Occasionally | Poor         |
| Following     | Occasionally     | Non Alcoholic | Occasionally | High Class   |
| Not Following | Occasionally     | Occasionally  | Occasionally | Poor         |
| Following     | Occasionally     | Occasionally  | Regular      | Poor         |
| Not Following | Occasionally     | Alcoholic     | Regular      | High Class   |
| Following     | Regular Exercise | Occasionally  | Occasionally | Poor         |
| Not Following | No Exercise      | Non Alcoholic | Non Smoker   | Middle Class |
| Not Following | Regular Exercise | Non Alcoholic | Regular      | High Class   |
| Occasionally  | No Exercise      | Alcoholic     | Regular      | High Class   |
| Occasionally  | Occasionally     | Occasionally  | Occasionally | Middle Class |
| Following     | Occasionally     | Occasionally  | Regular      | High Class   |
| Not Following | Occasionally     | Non Alcoholic | Regular      | High Class   |
| Following     | Occasionally     | Occasionally  | Regular      | Middle Class |
| Not Following | Occasionally     | Occasionally  | Occasionally | High Class   |
| Not Following | Occasionally     | Alcoholic     | Occasionally | Poor         |

Diagnosed

Yes

No

Yes

Yes

No

No

No

Yes

No

No

No

No

No

No

No

No

No

Yes

Yes

Yes

Yes

Yes

Yes

No

No

Yes

Yes

Yes

Yes

Yes

Yes

Yes

Yes

No

Yes

No

No  
No  
No  
No  
No  
No  
No  
Yes  
Yes  
No  
No  
Yes  
No  
No  
No  
Yes  
No  
Yes  
No  
Yes  
No  
No  
Yes  
No  
No  
Yes  
No  
Yes  
No  
No  
Yes  
Yes  
Yes  
No  
Yes  
No  
Yes  
Yes



No  
No  
Yes  
Yes  
No  
Yes  
Yes  
Yes  
Yes  
No  
Yes  
No  
Yes  
Yes  
No  
Yes  
No  
No  
Yes  
Yes  
No  
Yes  
No  
Yes  
No  
Yes  
Yes  
No  
Yes

No  
No  
Yes  
No  
Yes  
Yes  
Yes  
Yes  
Yes  
Yes  
No  
No  
Yes  
Yes  
Yes  
No  
Yes  
No  
Yes  
Yes  
Yes  
Yes  
No  
No  
Yes  
Yes  
No  
No  
No  
Yes  
Yes  
No  
No  
Yes  
No  
Yes  
Yes  
Yes  
No  
No  
Yes  
No

No  
Yes  
Yes  
Yes  
No  
No  
Yes  
Yes  
Yes  
Yes  
Yes  
Yes  
Yes  
Yes  
Yes  
No  
No  
Yes  
Yes  
Yes  
Yes  
Yes  
Yes  
No  
No  
No  
Yes  
No  
No  
No  
Yes  
No  
Yes  
Yes  
Yes  
Yes  
Yes  
Yes  
Yes  
No  
No  
Yes  
No  
No  
Yes  
No  
No

Yes  
Yes  
Yes  
Yes  
No  
No  
No  
No  
No  
No  
No  
No  
No  
Yes  
No  
No  
Yes  
Yes  
No  
No  
Yes  
No  
No  
No  
No  
No  
No  
No  
Yes  
Yes  
No  
Yes  
Yes  
Yes  
No  
Yes  
No  
Yes  
Yes  
Yes  
Yes  
Yes  
Yes  
Yes  
No

No  
No  
Yes  
No  
No  
No  
No  
Yes  
Yes  
No  
Yes  
No  
No  
No  
No  
Yes  
Yes  
No  
No  
No  
No  
No  
Yes  
Yes  
Yes  
No  
No  
No  
No  
Yes  
No  
Yes  
Yes  
No  
No  
Yes  
Yes  
No  
No  
Yes  
Yes  
No  
Yes

No  
No  
Yes  
No  
No  
Yes  
No  
No  
No  
No  
No  
Yes  
No  
Yes  
No  
Yes  
Yes  
Yes  
No  
Yes  
Yes  
Yes  
Yes  
Yes  
No  
No  
No  
No  
Yes  
Yes  
No  
Yes  
Yes  
Yes  
Yes  
Yes  
No  
No  
No  
No  
Yes  
No  
Yes  
No  
No  
No  
No

No  
Yes  
Yes  
Yes  
No  
Yes  
No  
No  
No  
Yes  
No  
Yes  
No  
Yes  
No  
No  
Yes  
Yes  
No  
Yes  
No  
No  
No  
No  
No  
Yes  
Yes  
Yes  
No  
No  
No  
Yes  
No  
Yes  
No

No  
Yes  
No  
No  
Yes  
Yes  
No  
No  
No  
Yes  
No  
No  
No  
No  
Yes  
Yes  
Yes  
Yes  
No  
No  
No  
No  
Yes  
Yes  
No  
No  
No  
No  
Yes  
Yes  
No  
No  
No  
No  
Yes  
Yes  
No  
No  
Yes  
Yes  
No  
Yes  
Yes  
No





Yes  
No  
Yes  
No  
No  
Yes  
Yes  
yes  
Yes  
No  
No  
No  
No  
Yes  
No  
No  
No  
No  
Yes  
Yes  
No  
No  
No  
No  
No  
Yes  
No  
No  
Yes  
Yes  
Yes  
No  
Yes  
No  
No  
No  
No  
Yes  
Yes  
No  
Yes  
No  
Yes  
Yes  
No  
Yes

Yes  
Yes  
No  
No  
No  
No  
No  
Yes  
Yes  
No  
No  
No  
Yes  
No  
Yes  
Yes  
Yes  
Yes  
No  
No  
No  
Yes  
Yes  
No  
Yes  
Yes  
No  
No  
No  
No  
No  
No  
Yes  
No  
Yes  
Yes  
Yes  
No  
No  
Yes  
Yes  
No  
Yes  
No



No  
No  
No  
No  
No  
Yes  
Yes  
Yes  
No  
No  
Yes  
Yes  
No  
No  
No  
Yes  
No  
Yes  
No  
Yes  
No  
No  
Yes  
Yes  
No  
No  
Yes  
Yes  
No  
No  
Yes  
Yes  
No  
No  
Yes  
No  
Yes  
No  
No  
Yes  
No  
No  
Yes  
No  
No  
Yes  
No  
No  
No

Yes  
Yes  
Yes  
No  
No  
No  
Yes  
No  
No  
No  
Yes  
Yes  
No  
Yes  
No  
No  
No  
No  
Yes  
Yes  
Yes  
Yes  
No  
Yes  
No  
No  
No  
Yes  
No  
Yes  
Yes  
No  
Yes  
No  
Yes  
Yes  
Yes  
Yes  
No

No  
No  
No  
No  
No  
No  
No  
No  
No  
No  
No  
No  
Yes  
No  
No  
No  
No  
No  
No  
Yes  
No  
Yes  
No  
No  
No  
No  
Yes  
Yes  
No  
Yes  
Yes  
Yes  
Yes  
Yes  
Yes  
Yes  
Yes  
No  
Yes  
Yes  
No  
No  
No  
No  
Yes  
No  
No  
No  
Yes  
No  
No  
No  
Yes

Yes  
Yes  
Yes  
Yes  
Yes  
No  
Yes  
Yes  
No  
No  
Yes  
Yes  
Yes  
No  
No  
No  
No  
No  
Yes  
Yes  
No  
Yes  
Yes  
No  
No  
Yes  
Yes  
Yes  
No  
No  
Yes  
Yes  
Yes  
No  
No  
Yes  
Yes  
Yes  
No  
Yes  
No  
Yes  
Yes  
No  
No  
No



No  
Yes  
Yes  
No  
Yes  
No  
Yes  
No  
Yes  
Yes  
No  
Yes  
No  
No  
Yes  
Yes  
Yes  
No  
No  
Yes  
No  
Yes  
No  
Yes  
No  
Yes  
Yes  
No  
No  
Yes  
No  
No  
Yes  
No  
No  
Yes

Yes  
Yes  
Yes  
Yes  
No  
Yes  
No  
Yes  
No  
Yes  
No  
No  
No  
Yes  
Yes  
Yes  
No  
Yes  
Yes  
Yes  
Yes  
Yes  
No  
Yes  
No  
No  
No  
Yes  
No  
Yes  
Yes  
No  
No  
No  
Yes  
No  
No  
No  
Yes  
Yes  
No  
Yes  
Yes  
No

Yes  
No  
Yes  
No  
No  
No  
Yes  
Yes  
Yes  
Yes  
Yes  
No  
No  
Yes  
Yes  
No  
No  
No  
No  
No  
Yes  
No  
Yes  
Yes  
No  
No  
No  
Yes  
No  
No  
Yes  
No  
No  
Yes  
No  
No  
Yes  
No  
Yes  
Yes  
No  
Yes  
Yes  
Yes  
No  
Yes  
Yes  
Yes  
No

Yes  
Yes  
Yes  
No  
No  
No  
Yes  
No  
No  
No  
Yes  
No  
No  
No  
No  
No  
No  
Yes  
No  
No  
Yes  
No  
Yes  
No  
No  
Yes  
Yes  
No  
Yes  
No  
Yes  
Yes  
No  
Yes  
Yes  
Yes  
Yes  
Yes  
Yes  
Yes

No  
No  
No  
Yes  
No  
No  
No  
No  
No  
Yes  
No  
No  
Yes  
Yes  
No  
No  
No  
No  
Yes  
Yes  
No  
No  
No  
No  
No  
Yes  
No  
No  
No  
No  
Yes  
Yes  
No  
No  
No  
No  
Yes  
Yes  
No  
No  
No  
Yes  
No  
No  
No  
No

Yes  
Yes  
No  
Yes  
No  
No  
No  
Yes  
No  
Yes  
No  
No  
Yes  
No  
No  
Yes  
No  
No  
No  
Yes  
Yes  
No  
Yes  
No  
No  
No  
No

Yes  
No  
Yes  
No  
No  
No  
Yes  
Yes  
No  
No  
No  
No  
No  
Yes  
No  
No  
No  
No  
Yes  
Yes  
Yes  
No  
Yes  
No  
Yes  
No  
No  
No  
Yes  
No  
Yes

No  
No  
No  
No  
No  
No  
Yes  
No  
No  
Yes  
No  
Yes  
No  
Yes  
Yes  
Yes  
No  
No  
No  
No  
No  
No  
Yes  
No  
Yes  
Yes  
No  
Yes  
Yes  
Yes  
Yes  
No  
Yes  
Yes  
Yes  
No



Yes  
No  
No  
Yes  
No  
Yes  
Yes  
Yes  
No  
No  
No  
Yes  
No  
No  
No  
Yes  
Yes  
Yes  
Yes  
No  
Yes  
Yes  
Yes  
Yes  
No  
No  
Yes  
No  
No  
Yes  
No  
No  
Yes  
No  
No  
Yes  
No  
Yes  
Yes  
Yes  
Yes  
No

Yes  
No  
Yes  
Yes  
No  
Yes  
No  
Yes  
Yes  
No  
No  
Yes  
No  
Yes  
No  
No  
Yes  
Yes  
No  
Yes  
Yes  
Yes  
Yes  
No  
No  
No  
No  
No  
No  
No

Yes  
No  
No  
No  
No  
Yes  
Yes  
No  
No  
Yes  
Yes  
Yes  
Yes  
Yes  
No  
No  
No  
Yes  
Yes  
Yes  
Yes  
Yes  
No  
No  
No  
No  
No  
No  
Yes  
No  
No  
No  
No  
No  
Yes  
No  
No  
No  
No

No  
No  
Yes  
Yes  
No  
No  
No  
No  
Yes  
No  
No  
No  
Yes  
Yes  
Yes  
No  
Yes  
No  
Yes  
No  
Yes  
Yes  
No  
Yes  
No  
No  
Yes  
Yes  
No  
No  
Yes  
No  
No  
Yes  
No  
Yes  
Yes  
No  
No  
Yes  
Yes  
No  
No  
Yes

Yes  
No  
No  
Yes  
No  
No  
Yes  
Yes  
No  
No  
No  
Yes  
No  
Yes  
Yes  
Yes  
No  
No  
No  
Yes  
Yes  
Yes  
No  
Yes  
No  
Yes  
Yes  
No  
No  
Yes  
Yes  
Yes  
No  
No  
Yes  
No  
No  
Yes  
No  
Yes  
No

No  
Yes  
No  
Yes  
No  
Yes  
No  
Yes  
No  
No  
Yes  
Yes  
Yes  
Yes  
No  
No  
Yes  
No  
No  
Yes  
Yes  
Yes  
No  
No  
Yes  
No  
No  
Yes  
Yes  
Yes  
No  
Yes  
Yes  
Yes  
No  
No  
Yes  
No  
Yes  
No  
No  
Yes

No  
Yes  
Yes  
No  
No  
Yes  
Yes  
Yes  
No  
Yes  
No  
No  
No  
No  
Yes  
Yes  
Yes  
No  
Yes  
No  
No  
Yes  
No  
Yes  
No  
No  
No  
No  
No  
Yes  
Yes  
Yes  
Yes  
Yes  
Yes  
No  
No

Yes  
No  
No  
Yes  
Yes  
No  
No  
Yes  
Yes  
No  
Yes  
No  
Yes  
No  
No  
Yes  
No  
Yes  
Yes  
Yes  
No  
Yes  
Yes  
Yes  
No  
No  
Yes  
No  
No  
Yes  
No  
Yes  
No  
No  
Yes  
No  
No  
Yes  
No  
No  
Yes  
No  
No  
Yes  
Yes



Yes  
No  
Yes  
No  
Yes  
Yes  
No  
No  
No  
No  
No  
No  
No  
Yes  
No  
No  
No  
No  
No  
No  
No  
Yes  
Yes  
Yes  
Yes  
No  
No  
No  
No  
No  
No  
No  
No  
No  
Yes  
No  
No  
No  
No  
No  
No  
Yes  
Yes  
Yes  
Yes  
No  
No  
No  
No

No  
Yes  
No  
Yes  
Yes  
No  
Yes  
No  
No  
Yes  
Yes  
Yes  
No  
No  
Yes  
Yes  
Yes  
Yes  
Yes  
Yes  
No  
No  
Yes  
No  
No  
No  
No  
No  
No  
No  
No  
Yes  
Yes  
No  
No  
No  
Yes  
Yes  
Yes  
Yes  
No  
Yes  
Yes  
Yes  
No  
No  
No  
No  
No

No  
No  
No  
No  
No  
No  
No  
No  
No  
No  
No  
No  
No  
No  
No  
No  
No  
No  
No  
Yes  
Yes  
No  
No  
No  
No  
No  
No  
No  
Yes  
Yes  
No  
No  
No  
Yes  
No  
Yes  
No  
No  
Yes  
Yes  
Yes  
Yes  
Yes  
No  
No  
No  
Yes  
No  
Yes  
No  
Yes

Yes  
No  
Yes  
Yes  
No  
No  
Yes  
No  
Yes  
Yes  
No  
Yes  
No  
Yes  
No  
Yes  
Yes  
No  
Yes  
No  
No  
No  
Yes  
Yes  
Yes  
Yes  
No  
No  
No  
No  
Yes  
No  
Yes  
No  
No  
No  
No  
No  
No

No  
No  
No  
No  
Yes  
Yes  
Yes  
No  
No  
Yes  
No  
Yes  
No  
No  
No  
Yes  
Yes  
Yes  
Yes  
No  
No  
Yes  
Yes  
Yes  
Yes  
No  
Yes  
Yes  
Yes  
Yes  
No  
Yes  
Yes  
Yes  
No  
No  
No  
No  
No  
No

Yes  
No  
Yes  
Yes  
No  
No  
Yes  
No  
No  
Yes  
Yes  
Yes  
Yes  
Yes  
No  
Yes  
No  
No  
No  
No  
Yes  
No  
No  
No  
No  
Yes  
No  
Yes  
Yes  
Yes  
Yes  
No  
Yes  
Yes  
No  
No  
Yes  
No  
No  
Yes  
No  
No  
No

No  
Yes  
Yes  
Yes  
Yes  
No  
Yes  
No  
No  
Yes  
Yes  
No  
No  
No  
Yes  
No  
No  
No  
Yes  
No  
No  
Yes  
Yes  
No  
Yes  
No  
No  
No  
Yes  
Yes  
No  
No  
No  
No  
Yes  
Yes  
No  
No  
Yes  
Yes

Yes  
No  
No  
Yes  
No  
No  
Yes  
Yes  
No  
No  
Yes  
Yes  
Yes  
No  
No  
No  
Yes  
No  
Yes  
Yes  
Yes  
Yes  
Yes  
No  
No  
No  
No  
Yes  
No  
No  
No  
No  
Yes  
No  
No  
Yes  
Yes  
Yes  
Yes  
Yes  
Yes  
No  
Yes



No  
No  
No  
Yes  
Yes  
Yes  
Yes  
Yes  
Yes  
No  
Yes  
No  
Yes  
Yes  
No  
Yes  
Yes  
Yes  
Yes  
No  
No  
Yes  
No  
No  
No  
No  
Yes  
No  
Yes  
No  
No  
Yes  
Yes  
Yes  
No  
No

No  
Yes  
No  
No  
Yes  
No  
Yes  
Yes  
No  
Yes  
Yes  
No  
Yes  
No  
No  
Yes  
No  
No  
No  
No  
Yes  
No  
Yes  
No  
No  
Yes  
No  
No  
No  
Yes  
No  
No  
Yes  
Yes  
Yes  
No  
Yes  
Yes  
No  
No  
Yes  
No  
Yes  
No  
No





No  
Yes  
Yes  
Yes  
Yes  
Yes  
No  
Yes  
No  
Yes  
Yes  
No  
Yes  
Yes  
Yes  
Yes  
No  
Yes  
Yes  
No  
No  
No  
Yes  
Yes  
No  
No  
Yes  
No  
No  
Yes  
No  
No  
Yes  
No  
Yes  
Yes  
Yes  
Yes  
No  
No  
Yes  
Yes  
No  
No

Yes  
Yes  
Yes  
No  
Yes  
Yes  
Yes  
Yes  
No  
Yes  
Yes  
Yes  
No  
Yes  
No  
Yes  
No  
No  
Yes  
No  
No  
Yes  
No  
Yes  
Yes  
No  
No  
No  
Yes  
Yes  
No  
Yes  
Yes  
Yes  
No  
Yes

No  
No  
Yes  
No  
Yes  
Yes  
No  
Yes  
No  
No  
No  
Yes  
Yes  
Yes  
Yes  
Yes  
No  
No  
Yes  
No  
No  
No  
No  
No  
No  
No  
No  
Yes  
Yes  
No

Yes  
No  
Yes  
Yes  
Yes  
Yes  
Yes  
Yes  
Yes  
Yes  
No  
Yes  
No  
No  
No  
No  
Yes  
Yes  
No  
Yes  
No  
No  
Yes  
No  
Yes  
No  
Yes  
No  
Yes  
No  
No  
No  
Yes  
Yes  
Yes  
Yes  
Yes  
Yes  
No  
No  
No  
No  
No  
Yes  
Yes  
No  
No



Yes  
No  
No  
Yes  
No  
Yes  
No  
Yes  
Yes  
No  
Yes  
No  
Yes  
No  
Yes  
No  
No  
Yes  
No  
No  
Yes  
No  
Yes  
Yes

Yes  
Yes  
Yes  
Yes  
Yes  
No  
Yes  
Yes  
Yes  
Yes  
No  
Yes  
Yes  
No  
Yes  
No  
No  
No  
Yes  
No  
No  
No  
Yes  
No  
No  
Yes  
No  
Yes  
Yes  
Yes  
Yes  
Yes  
No  
No  
Yes  
Yes  
Yes  
No  
Yes  
Yes  
No  
Yes

No  
No  
No  
Yes  
No  
No  
Yes  
Yes  
Yes  
Yes  
No  
No  
Yes  
Yes  
Yes  
Yes  
Yes  
No  
Yes  
No  
Yes  
No  
No  
Yes  
Yes  
Yes  
No  
Yes  
Yes  
Yes  
Yes  
Yes  
No  
No  
No  
Yes  
No  
Yes  
Yes  
No  
Yes  
No  
Yes  
Yes  
Yes  
Yes

Yes  
Yes  
No  
Yes  
Yes  
Yes  
No  
Yes  
No  
Yes  
Yes  
No  
Yes  
No  
No  
No  
Yes  
No  
Yes  
Yes  
Yes  
No  
No  
No  
Yes  
No  
Yes  
Yes  
Yes  
No  
No  
Yes  
Yes  
No  
No  
Yes  
Yes  
No  
Yes  
No  
No  
Yes  
No  
Yes  
No  
No



No  
Yes  
No  
No  
Yes  
No  
Yes  
Yes  
Yes  
No  
Yes

No  
Yes  
Yes  
Yes  
Yes  
No  
Yes  
Yes  
Yes  
Yes  
No  
Yes  
No  
Yes  
Yes  
No  
No  
Yes  
Yes  
Yes  
No  
No  
Yes  
No  
No  
No  
No  
No  
No  
No





No  
Yes  
No  
No  
No  
Yes  
Yes  
No  
No  
No  
No  
Yes  
No  
No  
No  
No  
No  
Yes  
No  
No  
No  
No  
No  
Yes  
No  
No  
No  
No  
No  
Yes  
Yes  
Yes  
No  
No  
Yes  
Yes  
No  
No  
Yes  
Yes  
No  
No  
No



Yes  
No  
No  
Yes  
No  
Yes  
Yes  
Yes  
Yes  
Yes  
Yes  
No  
Yes  
No  
No  
No  
Yes  
No  
Yes  
No  
No  
Yes  
Yes  
Yes  
No  
Yes  
No  
No  
No  
No  
Yes  
Yes  
Yes  
Yes  
No  
Yes  
No  
Yes  
Yes  
Yes

Yes  
Yes  
Yes  
Yes  
No  
Yes  
Yes  
Yes  
Yes  
Yes  
No  
No  
Yes  
Yes  
Yes  
Yes  
Yes  
No  
No  
Yes  
Yes  
No  
No  
Yes  
No  
No  
Yes  
Yes  
No  
Yes  
Yes  
No  
Yes  
Yes  
No  
Yes  
No  
No  
Yes  
No  
No





Yes  
Yes  
Yes  
Yes  
No  
No  
Yes  
Yes  
Yes  
Yes  
Yes  
Yes  
Yes  
Yes  
Yes  
No  
Yes  
Yes  
Yes  
No  
Yes  
No  
Yes  
Yes  
Yes  
Yes  
Yes  
Yes  
No  
Yes  
No  
Yes  
No  
Yes  
Yes  
Yes  
Yes  
Yes  
Yes  
Yes  
Yes  
Yes  
No  
No  
Yes  
No  
Yes  
Yes  
Yes  
Yes







No  
Yes  
Yes  
No  
Yes  
Yes  
Yes  
Yes  
Yes  
No  
Yes  
No  
No  
Yes  
Yes  
Yes  
Yes  
Yes  
Yes  
No  
Yes  
Yes  
Yes  
Yes  
Yes  
Yes  
No  
Yes  
No  
No  
Yes  
Yes  
Yes  
No  
No  
Yes  
Yes  
Yes  
No  
Yes  
No  
Yes  
Yes  
Yes

Yes  
Yes  
No  
Yes  
No  
Yes  
Yes  
No  
Yes  
Yes  
No  
No  
Yes  
No  
Yes  
No  
No  
Yes  
No  
Yes  
Yes  
Yes  
Yes  
Yes  
Yes  
No  
Yes  
Yes  
No  
Yes  
Yes  
Yes  
Yes  
Yes

No  
No  
No  
Yes  
No  
No  
Yes  
Yes  
Yes  
Yes  
Yes  
No  
No  
Yes  
No  
No  
No  
Yes  
No  
Yes  
No  
Yes  
No  
No  
Yes  
No  
No  
Yes  
No  
Yes  
Yes  
Yes  
No  
Yes  
No  
No  
Yes  
Yes  
Yes  
Yes  
Yes  
No  
Yes  
No  
Yes  
Yes  
Yes  
No  
Yes  
No

No  
Yes  
Yes  
No  
No  
Yes  
Yes  
No  
Yes  
Yes  
Yes  
No  
Yes  
No  
Yes  
Yes  
No  
Yes  
No  
No  
Yes  
Yes  
Yes  
No  
No  
Yes  
Yes  
Yes  
No  
No  
Yes  
No  
Yes  
No  
Yes  
No  
Yes  
Yes  
Yes  
No  
Yes

Yes  
No  
Yes  
No  
No  
Yes  
No  
Yes  
Yes  
Yes  
Yes  
Yes  
No  
No  
Yes  
Yes  
Yes  
No  
Yes  
Yes  
Yes  
No  
No  
Yes  
Yes  
No  
No  
No  
Yes  
Yes  
Yes  
No  
No  
Yes  
No  
Yes  
Yes  
Yes  
No

No  
Yes  
No  
No  
Yes  
Yes  
Yes  
Yes  
No  
Yes  
Yes  
No  
No  
No  
No  
Yes  
No  
Yes  
Yes  
No  
Yes  
No  
No  
No  
No  
No  
No  
No  
No  
Yes  
No  
No  
Yes  
No  
No  
No  
No  
No  
No  
Yes  
No  
No  
No  
No

Yes  
Yes  
No  
Yes  
No  
No  
No  
Yes  
No  
Yes  
No  
No  
No  
No  
No  
Yes  
Yes  
Yes  
Yes  
No  
No  
No  
No  
Yes  
No  
Yes  
No  
Yes  
No  
No  
Yes  
Yes  
No  
No  
Yes  
Yes  
No  
No  
No  
Yes  
No  
No  
Yes  
No  
No  
Yes  
No



No  
No  
No  
No  
Yes  
No  
Yes  
No  
No  
Yes  
Yes  
Yes  
No  
Yes  
Yes  
Yes  
No  
No  
No  
Yes  
Yes  
No  
Yes  
Yes  
Yes  
Yes  
Yes  
Yes  
No  
No  
No  
No  
No  
Yes  
No  
Yes  
No  
No  
No  
No  
No  
Yes  
Yes  
Yes  
No  
Yes  
No

No  
No  
Yes  
No  
Yes  
No  
Yes  
No  
Yes  
No  
No  
Yes  
Yes  
No  
No  
Yes  
No  
No  
No  
No  
No  
Yes  
Yes  
Yes  
No  
No  
No  
Yes  
No  
No  
Yes  
No  
No  
Yes  
No  
No  
Yes  
Yes  
No

No  
No  
Yes  
No  
No  
No  
No  
Yes  
Yes  
Yes  
Yes  
No  
No  
No  
No  
No  
Yes  
Yes  
Yes  
No  
No  
No  
No  
Yes  
Yes  
No  
Yes  
No  
No  
No  
No  
No  
No  
No  
No  
No  
Yes  
No

Yes  
No  
Yes  
Yes  
No  
No  
No  
Yes  
No  
Yes  
Yes  
Yes  
No  
No  
Yes  
Yes  
Yes  
No  
No  
No  
No  
No  
Yes  
Yes  
No  
Yes  
Yes  
No  
No  
Yes  
Yes  
No  
Yes  
No  
No  
Yes  
Yes  
Yes

yes  
Yes  
No  
No  
No  
No  
Yes  
No  
No  
No  
Yes  
Yes  
No  
No  
No  
No  
Yes  
No  
No  
Yes  
Yes  
Yes  
No  
Yes  
No  
No  
Yes  
Yes  
No  
No  
Yes  
Yes  
No  
Yes  
Yes  
Yes  
No  
No  
No  
No  
No

Yes  
Yes  
No  
No  
No  
Yes  
No  
Yes  
Yes  
Yes  
Yes  
No  
No  
No  
Yes  
Yes  
No  
Yes  
No  
Yes  
No  
No  
No  
No  
No  
No  
Yes  
No  
Yes  
Yes  
Yes  
No  
No  
Yes  
Yes  
Yes  
No  
No  
Yes  
Yes  
No  
No  
Yes  
Yes  
No



Yes  
No  
No  
Yes  
Yes  
No  
Yes  
Yes  
No  
No  
Yes  
No  
Yes  
No  
Yes  
No  
No  
Yes  
Yes  
Yes  
No  
No  
No  
Yes  
No  
No  
No  
Yes  
Yes  
No  
Yes  
No  
No  
No  
Yes  
Yes  
Yes  
No  
Yes  
Yes



Yes  
Yes  
Yes  
No  
Yes  
No  
No  
No  
Yes  
No  
Yes  
Yes  
No  
No  
Yes  
No  
Yes  
Yes  
Yes  
No  
Yes  
No  
No  
No  
No  
No  
No  
Yes  
No  
Yes  
No  
No  
No  
No



Yes  
Yes  
No  
Yes  
No  
No  
Yes  
Yes  
Yes  
No  
No  
Yes  
Yes  
No  
Yes  
No  
No  
No  
Yes  
No  
Yes  
No  
No  
No  
Yes  
No  
No  
Yes  
No  
Yes  
Yes  
No  
Yes  
No  
Yes  
No  
Yes  
No  
Yes  
No  
Yes  
No  
Yes  
No

Yes  
No  
Yes  
Yes  
No  
Yes  
No  
No  
Yes  
Yes  
Yes  
No  
No  
Yes  
No  
No  
Yes  
Yes  
Yes  
Yes  
Yes  
Yes  
Yes  
Yes  
Yes  
No  
Yes  
No  
Yes  
No  
No  
Yes  
No  
No  
Yes  
No  
Yes  
Yes  
Yes  
Yes  
Yes  
Yes  
No  
Yes

No  
Yes  
No  
Yes  
No  
No  
No  
Yes  
Yes  
Yes  
Yes  
No  
Yes  
Yes  
Yes  
Yes  
Yes  
Yes  
Yes  
Yes  
Yes  
No  
Yes  
Yes  
No  
No  
No  
Yes  
Yes  
Yes  
No  
Yes  
Yes  
Yes  
Yes  
Yes  
No  
Yes  
No  
No  
Yes  
Yes  
Yes  
Yes









Yes  
Yes  
Yes  
Yes  
Yes  
Yes  
Yes  
Yes  
Yes  
Yes  
Yes  
Yes  
Yes  
Yes  
Yes  
Yes  
Yes  
Yes  
Yes  
Yes  
Yes  
Yes  
Yes  
Yes  
Yes  
Yes  
Yes  
Yes  
Yes  
Yes  
Yes  
Yes  
Yes  
Yes  
Yes  
Yes  
Yes  
Yes  
Yes  
Yes  
Yes  
No  
No  
Yes  
Yes  
Yes  
No  
No  
Yes

No  
Yes  
Yes  
Yes  
No  
Yes  
No  
Yes  
Yes  
No  
Yes  
No  
No  
No  
No  
No  
No  
Yes  
No  
Yes  
No  
No  
No  
No  
Yes  
Yes  
Yes  
Yes  
No  
Yes  
No  
No  
No  
No  
No  
Yes  
Yes  
Yes  
Yes  
No  
Yes  
Yes  
No  
Yes  
Yes

Yes  
No  
Yes  
No  
No  
No  
No  
No  
Yes  
No  
Yes  
Yes  
No  
No  
Yes  
No  
No  
Yes  
Yes  
Yes  
Yes  
Yes  
Yes  
Yes  
No  
Yes  
No  
No  
No  
No  
Yes  
No  
No  
Yes  
No  
No  
No  
No  
Yes  
No  
Yes  
Yes  
Yes  
Yes  
No  
Yes  
Yes  
No



No  
No  
Yes  
Yes  
No  
No  
Yes  
Yes  
Yes  
No  
No  
Yes  
No  
No  
Yes  
Yes  
Yes  
No  
No  
No  
No  
Yes  
No  
Yes  
Yes  
Yes  
Yes  
No  
Yes  
Yes  
Yes  
No  
No  
No  
Yes  
No  
No  
No  
No  
No  
No  
Yes  
No

No  
Yes  
Yes  
No  
Yes  
No  
Yes  
No  
Yes  
No  
No  
No  
Yes  
No  
No  
No  
Yes  
No  
No  
Yes  
Yes  
Yes  
Yes  
Yes  
Yes  
Yes  
No  
Yes  
No  
No  
No  
Yes  
Yes  
Yes  
Yes  
Yes  
Yes  
No  
Yes  
No  
Yes  
Yes  
No  
No  
No  
No

No  
No  
No  
No  
No  
Yes  
Yes  
Yes  
Yes  
Yes  
No  
No  
Yes  
No  
No  
No  
No  
Yes  
No  
Yes  
No  
No  
No  
Yes  
No  
No  
No  
Yes  
No  
No  
Yes  
No  
Yes  
Yes  
Yes  
No  
Yes  
Yes  
Yes  
No  
Yes  
No  
No  
Yes  
No  
No

No  
No  
Yes  
No  
Yes  
No  
No  
Yes  
No  
No  
No  
Yes  
No  
No  
Yes  
No  
No  
Yes  
Yes  
Yes  
No  
Yes  
Yes  
Yes  
No  
No  
No  
Yes  
No  
Yes  
No  
No  
No  
No  
No  
Yes  
Yes  
No  
Yes  
Yes  
No



Yes  
Yes  
Yes  
Yes  
Yes  
No  
No  
Yes  
No  
No  
Yes  
Yes  
No  
Yes  
No  
Yes  
No  
Yes  
Yes  
Yes  
Yes  
No  
No  
Yes  
No  
Yes  
No  
Yes  
Yes

No  
No  
Yes  
Yes  
No  
No  
No  
No  
Yes  
No  
Yes  
No  
Yes  
Yes  
Yes  
Yes  
Yes  
Yes  
Yes  
Yes  
Yes  
No  
No  
No  
No  
Yes  
No  
Yes  
No  
No  
Yes  
Yes  
Yes  
Yes  
No  
Yes  
No  
Yes  
No  
No  
Yes  
Yes  
No  
Yes  
Yes

Yes  
Yes  
Yes  
Yes  
No  
Yes  
Yes  
Yes  
Yes  
No  
Yes  
No  
Yes  
Yes  
No  
Yes  
Yes  
Yes  
Yes  
No  
Yes  
Yes  
Yes  
Yes  
No  
No  
No  
Yes  
Yes  
No  
No  
No  
Yes  
No  
No  
Yes  
No  
Yes  
Yes  
Yes  
Yes  
No  
No

Yes  
Yes  
No  
Yes  
Yes  
Yes  
No  
Yes  
Yes  
Yes  
Yes  
No  
Yes  
Yes  
No  
Yes  
No  
Yes  
No  
Yes  
No  
No  
Yes  
No  
Yes  
Yes  
Yes  
Yes  
No  
No  
No  
No  
No  
Yes  
Yes  
Yes  
Yes  
No  
No  
No  
No  
No  
No  
No  
Yes



No  
No  
Yes  
No  
No  
No  
No  
Yes  
No  
No  
No  
Yes  
Yes  
Yes  
No  
Yes  
No  
Yes  
Yes  
No  
No  
No  
Yes  
Yes  
No  
No  
No  
Yes  
Yes  
No  
No  
Yes  
No  
No  
Yes  
Yes  
No  
Yes  
Yes  
No  
No  
Yes  
Yes

No  
No  
Yes  
No  
No  
Yes  
Yes  
No  
No  
No  
Yes  
Yes  
Yes  
Yes  
No  
No  
No  
Yes  
Yes  
Yes  
No  
Yes  
No  
Yes  
Yes  
Yes  
No  
No  
Yes  
Yes  
Yes  
Yes  
No  
No  
Yes  
Yes  
Yes  
Yes  
No  
No  
Yes  
No  
Yes  
No  
No

Yes  
No  
Yes  
No  
Yes  
No  
Yes  
No  
No  
Yes  
Yes  
Yes  
Yes  
Yes  
No  
No  
Yes  
No  
Yes  
No  
Yes  
No  
Yes  
No  
No  
Yes  
Yes  
Yes  
No  
No  
No  
Yes  
Yes  
Yes  
Yes  
No  
Yes  
No  
No  
Yes  
No  
No



Yes  
No  
Yes  
No  
No  
No  
No  
Yes  
No  
No  
Yes  
No  
Yes  
Yes  
Yes  
No  
Yes  
Yes  
Yes  
No  
No  
No  
Yes  
No  
No  
Yes  
No  
Yes  
No  
Yes  
No  
No  
No  
No  
Yes  
Yes  
Yes  
No  
Yes  
No  
Yes  
No  
No  
No  
No  
Yes  
Yes  
Yes  
No

Yes  
No  
Yes  
No  
Yes  
Yes  
Yes  
Yes  
Yes  
No  
Yes  
No  
Yes  
Yes  
No  
No  
No  
No  
No  
Yes  
Yes  
Yes  
Yes  
Yes  
Yes  
No  
No  
Yes  
No  
No  
Yes  
Yes  
No  
No  
No  
Yes  
No  
Yes  
No  
No  
Yes  
No  
Yes  
No  
Yes

Yes  
Yes  
No  
Yes  
Yes  
No  
No  
Yes  
No  
Yes  
Yes  
Yes  
No  
Yes  
No  
Yes  
Yes  
No  
No  
No  
Yes  
No  
Yes  
Yes  
Yes  
No  
Yes  
No  
Yes  
Yes  
No  
No  
No  
No  
No  
No  
No  
No  
Yes  
No  
No  
No  
No  
No  
No

Yes  
Yes  
Yes  
Yes  
No  
No  
No  
No  
No  
No  
No  
Yes  
No  
No  
No  
No  
No  
No  
Yes  
Yes  
Yes  
Yes  
No  
No  
No  
No  
No  
Yes  
No  
Yes  
Yes  
No  
Yes  
No  
No  
No  
No  
No  
Yes  
No  
Yes  
Yes  
No  
Yes  
No  
Yes

No  
No  
Yes  
No  
No  
Yes  
Yes  
Yes  
No  
Yes  
Yes  
Yes  
No  
No  
Yes  
Yes  
Yes  
Yes  
Yes  
Yes  
No  
No  
Yes  
No  
No  
No  
No  
No  
No  
No  
No  
Yes  
Yes  
No  
No















No  
No  
No  
No  
No  
No  
No  
No  
No  
No  
No  
No  
No  
No  
No  
No  
No  
No  
No  
No  
No  
No  
No  
No  
No  
No  
No  
No  
No  
No  
No  
No  
No  
No  
No  
No  
No  
No  
No  
No  
No  
No  
No  
No  
No  
No  
No  
No  
No  
No  
No  
Yes  
No  
Yes  
No  
Yes  
No  
No  
No  
No  
Yes  
Yes  
Yes  
Yes  
Yes  
No  
Yes  
Yes  
No  
Yes  
Yes

No  
Yes  
No  
No  
Yes  
No  
No  
No  
No  
No  
Yes  
No  
Yes  
No  
No  
Yes  
Yes  
Yes  
No  
Yes  
Yes  
Yes  
Yes  
Yes  
No  
No  
No  
No  
Yes  
Yes  
No  
Yes  
No  
No  
No  
No  
Yes  
No  
No  
No  
No  
No  
No

Yes

Yes

Yes

No

Yes

No

No

No

No

Yes

No

Yes

No

Yes

No

No

Yes

Yes

No

Yes

No

Yes

No

No

No

No

No

No

Yes

Yes

Yes

No

No

No

Yes

No

Yes

No

No

Yes  
No  
No  
Yes  
Yes  
No  
No  
No  
No  
Yes  
No  
No  
No  
No  
Yes  
Yes  
Yes  
Yes  
No  
No  
No  
No  
Yes  
Yes  
No  
No  
No  
No  
Yes  
Yes  
No  
Yes  
No  
No  
Yes  
Yes  
No  
Yes  
Yes  
No  
Yes  
Yes  
No  
Yes  
No  
No

No  
No  
No  
No  
Yes  
No  
Yes  
No  
Yes  
Yes  
No  
No  
No  
Yes  
No  
Yes  
No  
Yes  
Yes  
Yes  
No  
No  
No  
No  
Yes  
Yes  
Yes  
Yes  
No  
No  
No  
No  
No  
No  
Yes  
No  
No  
Yes  
Yes  
No  
No  
Yes  
Yes  
Yes





|    |        |     |    |     |    |     |                       |             |
|----|--------|-----|----|-----|----|-----|-----------------------|-------------|
| 58 | Male   | 153 | 57 | 121 | 91 | Yes | Occasional Regular Ex | Yes         |
| 62 | Male   | 154 | 58 | 148 | 91 | No  | Occasional No Exercis | No          |
| 41 | Male   | 165 | 70 | 145 | 89 | No  | Occasional Regular Ex | Yes         |
| 45 | Female | 180 | 75 | 101 | 78 | Yes | Occasional Regular Ex | Yes         |
| 46 | Male   | 179 | 79 | 108 | 82 | Yes | Not Follow Regular Ex | Yes         |
| 66 | Female | 142 | 83 | 132 | 81 | No  | Not Follow Regular Ex | Yes         |
| 54 | Male   | 140 | 52 | 112 | 88 | Yes | Following No Exercis  | Yes         |
| 62 | Female | 165 | 65 | 120 | 75 | Yes | Not Follow Regular Ex | No          |
| 63 | Female | 167 | 67 | 102 | 95 | Yes | Following No Exercis  | Yes         |
| 60 | Male   | 156 | 60 | 121 | 74 | Yes | Occasional No Exercis | Yes         |
| 61 | Female | 155 | 67 | 120 | 88 | No  | Occasional Regular Ex | Yes         |
| 60 | Female | 150 | 80 | 119 | 83 | Yes | Occasional No Exercis | No          |
| 51 | Female | 178 | 81 | 123 | 88 | Yes | Occasional Regular Ex | Yes         |
| 49 | Female | 179 | 83 | 98  | 95 | Yes | Occasional No Exercis | Yes         |
| 61 | Female | 145 | 60 | 142 | 90 | Yes | Occasional Occasional | Yes         |
| 43 | Female | 146 | 80 | 130 | 80 | No  | Following Occasional  | Yes         |
| 57 | Female | 140 | 65 | 132 | 78 | Yes | Occasional No Exercis | Yes         |
| 66 | Female | 140 | 59 | 96  | 89 | Yes | Occasional No Exercis | No          |
| 39 | Female | 152 | 57 | 120 | 81 | No  | Not Follow Regular Ex | Yes         |
| 36 | Female | 150 | 59 | 115 | 95 | Yes | Not Follow Regular Ex | During Pre; |
| 54 | Male   | 165 | 69 | 114 | 66 | Yes | Not Follow Occasional | Yes         |
| 45 | Male   | 166 | 66 | 129 | 89 | No  | Not Follow Regular Ex | Yes         |
| 53 | Male   | 175 | 90 | 130 | 78 | Yes | Following No Exercis  | Yes         |
| 59 | Male   | 171 | 73 | 101 | 82 | No  | Not Follow No Exercis | Yes         |
| 57 | Female | 172 | 75 | 105 | 92 | No  | Not Follow Regular Ex | Yes         |
| 57 | Female | 143 | 76 | 140 | 79 | Yes | Following Regular Ex  | No          |
| 35 | Male   | 147 | 56 | 152 | 80 | No  | Not Follow No Exercis | Yes         |
| 58 | Male   | 149 | 89 | 145 | 86 | Yes | Following No Exercis  | Yes         |
| 57 | Male   | 156 | 89 | 100 | 78 | Yes | Following Regular Ex  | Yes         |
| 48 | Male   | 155 | 65 | 122 | 80 | No  | Following Regular Ex  | No          |
| 45 | Female | 154 | 65 | 102 | 88 | No  | Following Regular Ex  | Yes         |
| 56 | Male   | 152 | 62 | 101 | 90 | No  | Not Follow No Exercis | Yes         |
| 62 | Female | 151 | 69 | 145 | 92 | No  | Not Follow Occasional | Yes         |
| 71 | Female | 153 | 89 | 109 | 71 | Yes | Not Follow No Exercis | Yes         |
| 47 | Male   | 158 | 71 | 120 | 95 | No  | Not Follow Regular Ex | Yes         |
| 57 | Male   | 175 | 81 | 125 | 90 | Yes | Not Follow Regular Ex | No          |
| 59 | Male   | 180 | 83 | 142 | 85 | Yes | Not Follow Regular Ex | Yes         |
| 58 | Male   | 170 | 83 | 97  | 88 | Yes | Not Follow Regular Ex | No          |
| 35 | Male   | 174 | 84 | 128 | 89 | No  | Not Follow Regular Ex | Yes         |
| 54 | Male   | 176 | 84 | 120 | 75 | No  | Not Follow Regular Ex | Yes         |
| 65 | Female | 179 | 81 | 148 | 84 | Yes | Following Occasional  | Yes         |
| 67 | Male   | 174 | 82 | 145 | 95 | No  | Occasional No Exercis | No          |
| 63 | Female | 167 | 85 | 109 | 90 | Yes | Following Regular Ex  | Yes         |
| 48 | Male   | 168 | 66 | 152 | 90 | Yes | Occasional No Exercis | Yes         |
| 58 | Female | 156 | 79 | 108 | 84 | No  | Following Regular Ex  | Yes         |
| 45 | Male   | 159 | 52 | 128 | 88 | Yes | Following No Exercis  | Yes         |

|    |        |     |    |     |    |     |                       |     |
|----|--------|-----|----|-----|----|-----|-----------------------|-----|
| 59 | Female | 180 | 55 | 121 | 82 | Yes | Occasional Regular Ex | Yes |
| 54 | Male   | 174 | 56 | 111 | 66 | Yes | Occasional No Exercis | No  |
| 64 | Female | 173 | 60 | 105 | 89 | No  | Following Occasional  | Yes |
| 53 | Male   | 156 | 60 | 122 | 78 | Yes | Occasional Regular Ex | Yes |
| 57 | Female | 154 | 61 | 149 | 82 | Yes | Occasional No Exercis | Yes |
| 56 | Female | 154 | 57 | 110 | 92 | No  | Following No Exercis  | No  |
| 42 | Male   | 157 | 57 | 135 | 79 | Yes | Occasional Occasional | Yes |
| 71 | Female | 159 | 58 | 101 | 80 | Yes | Not Follow Regular Ex | Yes |
| 48 | Male   | 140 | 70 | 145 | 86 | Yes | Not Follow No Exercis | Yes |
| 49 | Female | 152 | 75 | 147 | 78 | No  | Following No Exercis  | Yes |
| 52 | Female | 155 | 79 | 145 | 80 | Yes | Following No Exercis  | Yes |
| 62 | Female | 145 | 83 | 145 | 88 | Yes | Not Follow No Exercis | No  |
| 65 | Female | 146 | 52 | 152 | 75 | Yes | Following Regular Ex  | Yes |
| 56 | Female | 165 | 65 | 121 | 92 | Yes | Following No Exercis  | No  |
| 44 | Male   | 146 | 67 | 151 | 78 | No  | Occasional Regular Ex | No  |
| 66 | Female | 165 | 68 | 121 | 78 | No  | Occasional Regular Ex | Yes |
| 52 | Male   | 148 | 66 | 99  | 78 | No  | Occasional No Exercis | Yes |
| 52 | Female | 153 | 67 | 95  | 89 | Yes | Following Regular Ex  | Yes |
| 56 | Male   | 154 | 60 | 111 | 88 | No  | Not Follow Regular Ex | No  |
| 64 | Female | 165 | 66 | 108 | 66 | Yes | Following Regular Ex  | Yes |
| 70 | Female | 166 | 67 | 121 | 80 | Yes | Following No Exercis  | Yes |
| 52 | Male   | 177 | 64 | 102 | 80 | Yes | Not Follow Regular Ex | No  |
| 55 | Male   | 179 | 72 | 152 | 98 | No  | Not Follow Regular Ex | Yes |
| 56 | Male   | 145 | 73 | 121 | 80 | No  | Not Follow Regular Ex | Yes |
| 46 | Female | 165 | 59 | 142 | 90 | Yes | Not Follow Regular Ex | Yes |
| 42 | Female | 167 | 81 | 131 | 88 | No  | Not Follow No Exercis | No  |
| 37 | Female | 156 | 82 | 148 | 67 | No  | Not Follow No Exercis | Yes |
| 50 | Female | 155 | 85 | 143 | 88 | Yes | Not Follow No Exercis | Yes |
| 58 | Male   | 176 | 66 | 129 | 80 | No  | Not Follow Regular Ex | No  |
| 57 | Male   | 178 | 86 | 108 | 71 | No  | Following No Exercis  | Yes |
| 52 | Male   | 179 | 52 | 135 | 68 | Yes | Following Regular Ex  | Yes |
| 58 | Female | 145 | 55 | 120 | 95 | No  | Following No Exercis  | Yes |
| 60 | Female | 146 | 56 | 140 | 85 | Yes | Following Regular Ex  | No  |
| 65 | Female | 165 | 60 | 150 | 78 | No  | Not Follow No Exercis | Yes |
| 51 | Male   | 155 | 50 | 93  | 74 | Yes | Not Follow Occasional | No  |
| 56 | Female | 176 | 53 | 92  | 89 | No  | Following Regular Ex  | Yes |
| 59 | Male   | 178 | 54 | 100 | 78 | Yes | Not Follow No Exercis | Yes |
| 62 | Male   | 179 | 59 | 110 | 68 | Yes | Not Follow Regular Ex | No  |
| 71 | Female | 145 | 76 | 102 | 99 | Yes | Following Regular Ex  | Yes |
| 59 | Female | 146 | 71 | 104 | 88 | No  | Following No Exercis  | Yes |
| 66 | Female | 165 | 68 | 106 | 77 | Yes | Not Follow No Exercis | No  |
| 51 | Male   | 155 | 79 | 120 | 80 | No  | Occasional No Exercis | No  |
| 62 | Female | 152 | 85 | 121 | 94 | Yes | Following Regular Ex  | Yes |
| 61 | Female | 150 | 88 | 135 | 90 | Yes | Not Follow No Exercis | Yes |
| 64 | Male   | 151 | 87 | 142 | 78 | Yes | Following Regular Ex  | No  |
| 51 | Male   | 145 | 84 | 152 | 80 | Yes | Not Follow No Exercis | Yes |
| 44 | Male   | 149 | 82 | 150 | 90 | Yes | Not Follow Regular Ex | Yes |

|    |        |     |    |     |     |           |               |                  |             |
|----|--------|-----|----|-----|-----|-----------|---------------|------------------|-------------|
| 68 | Female | 145 | 65 | 142 | 67  | Yes       | Following     | No Exercise      | No          |
| 62 | Female | 148 | 68 | 124 | 80  | Yes       | Following     | Regular Exercise | Yes         |
| 41 | Male   | 152 | 76 | 132 | 92  | No        | Not Following | No Exercise      | Yes         |
| 53 | Male   | 157 | 87 | 134 | 95  | Yes       | Not Following | No Exercise      | No          |
| 67 | Female | 156 | 90 | 129 | 99  | Yes       | Following     | Regular Exercise | Yes         |
| 69 | Female | 178 | 79 | 120 | 92  | Yes       | Following     | Regular Exercise | Yes         |
| 37 | Female | 169 | 78 | 121 | 85  | No        | Not Following | Regular Exercise | No          |
| 68 | Female | 168 | 79 | 130 | 101 | Yes       | Not Following | Regular Exercise | No          |
| 58 | Female | 179 | 80 | 131 | 88  | No        | Not Following | Regular Exercise | Yes         |
| 46 | Male   | 172 | 82 | 129 | 85  | Yes       | Following     | No Exercise      | Yes         |
| 78 | Female | 168 | 61 | 98  | 94  | Yes       | Not Following | Occasional       | Yes         |
| 78 | Female | 175 | 93 | 99  | 94  | Not Known | Occasional    | Occasional       | No          |
| 78 | Female | 175 | 86 | 127 | 92  | Not Known | Not Following | No Exercise      | No          |
| 78 | Female | 167 | 85 | 128 | 93  | Yes       | Following     | Regular Exercise | No          |
| 78 | Female | 169 | 80 | 130 | 91  | Not Known | Occasional    | No Exercise      | Yes         |
| 78 | Female | 162 | 67 | 131 | 96  | No        | Not Following | Occasional       | No          |
| 78 | Female | 173 | 83 | 137 | 95  | Not Known | Following     | No Exercise      | Yes         |
| 78 | Female | 152 | 60 | 139 | 94  | Yes       | Following     | Regular Exercise | No          |
| 78 | Female | 181 | 75 | 141 | 75  | Not Known | Not Following | No Exercise      | Yes         |
| 78 | Female | 164 | 75 | 90  | 99  | No        | Following     | Occasional       | No          |
| 78 | Female | 177 | 90 | 99  | 85  | Not Known | Not Following | Regular Exercise | No          |
| 78 | Female | 180 | 78 | 95  | 88  | No        | Occasional    | No Exercise      | Yes         |
| 78 | Female | 169 | 82 | 120 | 94  | Not Known | Occasional    | Occasional       | Yes         |
| 79 | Female | 173 | 74 | 123 | 95  | No        | Not Following | No Exercise      | No          |
| 79 | Female | 170 | 87 | 127 | 80  | No        | Following     | No Exercise      | No          |
| 79 | Female | 170 | 90 | 128 | 80  | Yes       | Following     | No Exercise      | No          |
| 79 | Female | 179 | 77 | 129 | 80  | No        | Occasional    | No Exercise      | Yes         |
| 79 | Female | 162 | 55 | 131 | 92  | Not Known | Not Following | Regular Exercise | Yes         |
| 79 | Male   | 155 | 76 | 132 | 94  | Not Known | Occasional    | Regular Exercise | Yes         |
| 79 | Female | 171 | 96 | 132 | 95  | Yes       | Occasional    | Occasional       | Yes         |
| 35 | Female | 145 | 73 | 125 | 91  | No        | Not Following | Regular Exercise | Yes         |
| 61 | Female | 146 | 69 | 129 | 88  | No        | Following     | No Exercise      | Yes         |
| 59 | Male   | 165 | 66 | 132 | 84  | No        | Following     | Regular Exercise | No          |
| 63 | Female | 155 | 86 | 142 | 78  | No        | Following     | No Exercise      | Yes         |
| 57 | Male   | 152 | 81 | 145 | 90  | Yes       | Not Following | Regular Exercise | Yes         |
| 61 | Male   | 150 | 83 | 102 | 74  | No        | Occasional    | No Exercise      | No          |
| 60 | Female | 151 | 69 | 110 | 77  | Yes       | Occasional    | Regular Exercise | Yes         |
| 39 | Male   | 145 | 77 | 108 | 75  | No        | Occasional    | Regular Exercise | Yes         |
| 67 | Male   | 149 | 71 | 128 | 85  | Yes       | Following     | No Exercise      | Yes         |
| 44 | Female | 145 | 71 | 129 | 87  | No        | Occasional    | No Exercise      | During Pre; |
| 57 | Female | 148 | 67 | 135 | 91  | Yes       | Occasional    | Regular Exercise | Yes         |
| 55 | Female | 152 | 68 | 138 | 85  | Yes       | Following     | Regular Exercise | Yes         |
| 60 | Male   | 157 | 67 | 140 | 94  | Yes       | Following     | No Exercise      | No          |
| 45 | Female | 156 | 64 | 142 | 95  | Yes       | Occasional    | No Exercise      | Yes         |
| 88 | Female | 178 | 72 | 148 | 83  | No        | Following     | No Exercise      | Yes         |
| 45 | Male   | 173 | 73 | 120 | 92  | No        | Not Following | No Exercise      | Yes         |
| 71 | Female | 162 | 59 | 110 | 88  | Yes       | Following     | Regular Exercise | No          |

|    |        |     |     |     |    |     |            |                  |     |
|----|--------|-----|-----|-----|----|-----|------------|------------------|-----|
| 53 | Male   | 181 | 81  | 120 | 90 | No  | Not Follow | No Exercise      | Yes |
| 50 | Male   | 181 | 82  | 123 | 94 | No  | Not Follow | Regular Exercise | Yes |
| 43 | Male   | 177 | 85  | 125 | 90 | No  | Following  | Regular Exercise | No  |
| 66 | Female | 170 | 88  | 144 | 78 | No  | Following  | Regular Exercise | Yes |
| 63 | Female | 179 | 83  | 105 | 82 | No  | Occasional | No Exercise      | Yes |
| 54 | Male   | 139 | 90  | 124 | 81 | Yes | Following  | No Exercise      | Yes |
| 61 | Female | 165 | 90  | 112 | 88 | Yes | Following  | Regular Exercise | Yes |
| 48 | Male   | 167 | 90  | 140 | 75 | Yes | Following  | No Exercise      | No  |
| 58 | Male   | 156 | 90  | 152 | 95 | Yes | Occasional | Regular Exercise | Yes |
| 61 | Male   | 155 | 90  | 112 | 74 | Yes | Not Follow | Regular Exercise | No  |
| 63 | Female | 160 | 90  | 114 | 92 | No  | Occasional | Regular Exercise | Yes |
| 51 | Male   | 178 | 67  | 118 | 83 | No  | Occasional | No Exercise      | Yes |
| 55 | Female | 179 | 87  | 132 | 88 | Yes | Occasional | No Exercise      | No  |
| 58 | Male   | 145 | 120 | 108 | 95 | Yes | Occasional | Occasional       | Yes |
| 57 | Male   | 146 | 67  | 132 | 92 | Yes | Not Follow | No Exercise      | Yes |
| 64 | Female | 165 | 120 | 145 | 80 | Yes | Occasional | Regular Exercise | Yes |
| 77 | Male   | 155 | 81  | 149 | 78 | Yes | Not Follow | Regular Exercise | Yes |
| 44 | Male   | 152 | 65  | 99  | 89 | No  | Not Follow | Regular Exercise | Yes |
| 44 | Male   | 150 | 120 | 90  | 81 | No  | Occasional | No Exercise      | No  |
| 53 | Male   | 151 | 120 | 111 | 88 | Yes | Occasional | Occasional       | Yes |
| 69 | Male   | 145 | 60  | 134 | 95 | Yes | Not Follow | Regular Exercise | Yes |
| 62 | Female | 149 | 120 | 104 | 92 | Yes | Occasional | Regular Exercise | Yes |
| 58 | Male   | 145 | 54  | 149 | 80 | Yes | Occasional | No Exercise      | No  |
| 76 | Female | 148 | 51  | 121 | 78 | Yes | Occasional | Regular Exercise | Yes |
| 54 | Male   | 152 | 55  | 107 | 89 | No  | Not Follow | No Exercise      | Yes |
| 57 | Male   | 157 | 51  | 120 | 81 | No  | Not Follow | Regular Exercise | Yes |
| 66 | Female | 156 | 56  | 118 | 95 | Yes | Not Follow | Regular Exercise | Yes |
| 68 | Male   | 170 | 78  | 142 | 71 | Yes | Occasional | No Exercise      | Yes |
| 67 | Male   | 180 | 71  | 121 | 98 | Yes | Occasional | Regular Exercise | No  |
| 41 | Male   | 179 | 76  | 140 | 80 | Yes | Occasional | No Exercise      | Yes |
| 43 | Male   | 180 | 77  | 132 | 78 | Yes | Occasional | Regular Exercise | No  |
| 58 | Male   | 174 | 65  | 120 | 95 | No  | Occasional | No Exercise      | Yes |
| 51 | Male   | 180 | 67  | 135 | 88 | No  | Not Follow | No Exercise      | Yes |
| 54 | Male   | 145 | 71  | 123 | 94 | Yes | Occasional | Occasional       | No  |
| 66 | Female | 156 | 72  | 101 | 72 | Yes | Not Follow | No Exercise      | Yes |
| 51 | Female | 176 | 77  | 141 | 90 | Yes | Not Follow | Regular Exercise | Yes |
| 70 | Male   | 170 | 79  | 147 | 87 | Yes | Occasional | Regular Exercise | Yes |
| 67 | Male   | 179 | 75  | 132 | 95 | Yes | Occasional | Regular Exercise | Yes |
| 54 | Female | 170 | 90  | 147 | 87 | No  | Following  | Regular Exercise | Yes |
| 50 | Male   | 155 | 56  | 149 | 80 | No  | Occasional | No Exercise      | No  |
| 47 | Male   | 159 | 74  | 118 | 84 | Yes | Not Follow | No Exercise      | Yes |
| 55 | Female | 165 | 90  | 147 | 71 | Yes | Following  | Regular Exercise | Yes |
| 43 | Male   | 176 | 61  | 120 | 95 | Yes | Following  | No Exercise      | Yes |
| 55 | Male   | 178 | 65  | 120 | 78 | Yes | Not Follow | Regular Exercise | No  |
| 65 | Female | 165 | 90  | 114 | 75 | Yes | Following  | No Exercise      | Yes |
| 67 | Male   | 153 | 49  | 149 | 77 | No  | Not Follow | Regular Exercise | Yes |
| 35 | Male   | 153 | 49  | 138 | 92 | No  | Not Follow | Regular Exercise | Yes |

|    |        |     |    |     |    |     |            |            |     |
|----|--------|-----|----|-----|----|-----|------------|------------|-----|
| 76 | Female | 155 | 90 | 121 | 88 | Yes | Following  | Regular Ex | Yes |
| 58 | Male   | 156 | 51 | 131 | 85 | Yes | Not Follow | No Exercis | Yes |
| 52 | Female | 157 | 90 | 138 | 82 | Yes | Following  | Regular Ex | No  |
| 60 | Female | 156 | 90 | 120 | 90 | Yes | Following  | No Exercis | Yes |
| 66 | Male   | 157 | 56 | 121 | 90 | Yes | Not Follow | Regular Ex | No  |
| 77 | Female | 158 | 71 | 110 | 84 | No  | Not Follow | Regular Ex | Yes |
| 56 | Male   | 159 | 77 | 126 | 88 | No  | Not Follow | Regular Ex | Yes |
| 56 | Male   | 161 | 76 | 121 | 82 | No  | Not Follow | Regular Ex | No  |
| 54 | Male   | 165 | 69 | 114 | 66 | Yes | Not Follow | Occasional | Yes |
| 45 | Male   | 166 | 66 | 129 | 89 | No  | Not Follow | Regular Ex | Yes |
| 53 | Male   | 175 | 90 | 130 | 78 | Yes | Following  | No Exercis | Yes |
| 59 | Male   | 171 | 73 | 101 | 82 | No  | Not Follow | No Exercis | Yes |
| 56 | Female | 153 | 68 | 142 | 78 | Yes | Following  | Occasional | Yes |
| 58 | Female | 155 | 79 | 122 | 86 | Yes | Following  | No Exercis | Yes |
| 64 | Female | 156 | 85 | 104 | 88 | Yes | Following  | Regular Ex | Yes |
| 67 | Female | 157 | 88 | 120 | 88 | No  | Following  | Regular Ex | No  |
| 64 | Male   | 156 | 87 | 108 | 88 | No  | Not Follow | Regular Ex | Yes |
| 56 | Male   | 157 | 84 | 144 | 70 | No  | Occasional | No Exercis | Yes |
| 59 | Male   | 158 | 82 | 105 | 74 | No  | Not Follow | Regular Ex | No  |
| 65 | Male   | 159 | 65 | 124 | 92 | No  | Not Follow | Regular Ex | Yes |
| 56 | Male   | 161 | 68 | 112 | 87 | Yes | Occasional | Occasional | Yes |
| 56 | Female | 165 | 76 | 140 | 87 | Yes | Occasional | Regular Ex | Yes |
| 63 | Male   | 166 | 87 | 152 | 66 | No  | Following  | No Exercis | No  |
| 56 | Male   | 176 | 90 | 112 | 66 | Yes | Following  | No Exercis | Yes |
| 58 | Female | 171 | 79 | 114 | 80 | Yes | Not Follow | No Exercis | Yes |
| 63 | Female | 172 | 78 | 118 | 80 | No  | Occasional | Regular Ex | No  |
| 60 | Male   | 143 | 79 | 132 | 89 | No  | Occasional | No Exercis | Yes |
| 59 | Male   | 147 | 77 | 108 | 82 | Yes | Following  | Occasional | Yes |
| 49 | Male   | 149 | 85 | 132 | 78 | No  | Occasional | Occasional | Yes |
| 64 | Female | 156 | 87 | 132 | 80 | Yes | Following  | Regular Ex | No  |
| 61 | Female | 155 | 90 | 120 | 90 | No  | Occasional | No Exercis | Yes |
| 47 | Male   | 154 | 83 | 125 | 82 | Yes | Following  | Regular Ex | Yes |
| 44 | Female | 152 | 76 | 110 | 80 | Yes | Occasional | No Exercis | No  |
| 41 | Male   | 151 | 80 | 134 | 80 | Yes | Not Follow | Regular Ex | Yes |
| 50 | Female | 166 | 67 | 120 | 68 | Yes | Occasional | Regular Ex | Yes |
| 41 | Male   | 176 | 76 | 101 | 73 | Yes | Occasional | Regular Ex | Yes |
| 59 | Male   | 171 | 68 | 142 | 85 | Yes | Occasional | Occasional | No  |
| 41 | Female | 172 | 69 | 120 | 88 | Yes | Following  | Regular Ex | Yes |
| 51 | Female | 143 | 64 | 140 | 88 | No  | Occasional | No Exercis | No  |
| 58 | Female | 147 | 92 | 120 | 78 | Yes | Following  | No Exercis | Yes |
| 59 | Male   | 149 | 90 | 104 | 85 | Yes | Not Follow | No Exercis | Yes |
| 59 | Female | 156 | 89 | 142 | 66 | No  | Following  | Regular Ex | No  |
| 57 | Female | 155 | 88 | 121 | 87 | Yes | Not Follow | Regular Ex | Yes |
| 61 | Female | 154 | 79 | 99  | 75 | Yes | Following  | No Exercis | Yes |
| 56 | Male   | 152 | 94 | 118 | 78 | No  | Not Follow | Regular Ex | Yes |
| 56 | Male   | 151 | 79 | 120 | 88 | Yes | Following  | Occasional | Yes |
| 41 | Male   | 153 | 81 | 148 | 80 | No  | Following  | Regular Ex | Yes |

|    |        |     |    |     |    |           |                             |     |
|----|--------|-----|----|-----|----|-----------|-----------------------------|-----|
| 60 | Male   | 158 | 82 | 119 | 87 | Yes       | Occasional No Exercise      | No  |
| 51 | Male   | 169 | 76 | 101 | 84 | Yes       | Occasional Regular Exercise | Yes |
| 61 | Male   | 177 | 78 | 139 | 90 | Yes       | Not Follow Occasional       | Yes |
| 57 | Male   | 178 | 75 | 118 | 82 | Yes       | Occasional Regular Exercise | Yes |
| 60 | Female | 156 | 73 | 105 | 74 | Yes       | Not Follow No Exercise      | No  |
| 59 | Male   | 176 | 83 | 121 | 80 | No        | Not Follow Occasional       | Yes |
| 55 | Male   | 167 | 84 | 149 | 88 | Yes       | Not Follow No Exercise      | Yes |
| 68 | Female | 166 | 81 | 108 | 81 | No        | Occasional Occasional       | Yes |
| 69 | Female | 168 | 82 | 132 | 90 | Not Known | Occasional No Exercise      | No  |
| 45 | Male   | 157 | 56 | 112 | 91 | Yes       | Not Follow No Exercise      | No  |
| 51 | Female | 159 | 51 | 120 | 91 | No        | Following No Exercise       | Yes |
| 48 | Male   | 140 | 65 | 102 | 89 | Yes       | Not Follow Regular Exercise | Yes |
| 59 | Female | 152 | 65 | 121 | 78 | Yes       | Occasional Regular Exercise | No  |
| 47 | Male   | 155 | 62 | 120 | 82 | No        | Not Follow No Exercise      | Yes |
| 46 | Male   | 145 | 69 | 119 | 81 | Yes       | Not Follow Regular Exercise | Yes |
| 58 | Female | 146 | 70 | 123 | 88 | No        | Occasional No Exercise      | No  |
| 58 | Female | 165 | 71 | 98  | 75 | Yes       | Occasional Occasional       | Yes |
| 61 | Male   | 148 | 81 | 142 | 95 | Yes       | Following No Exercise       | No  |
| 56 | Female | 153 | 83 | 130 | 74 | Yes       | Following Occasional        | Yes |
| 66 | Female | 154 | 83 | 132 | 92 | Yes       | Following Regular Exercise  | Yes |
| 52 | Female | 165 | 84 | 96  | 83 | Yes       | Following Regular Exercise  | No  |
| 62 | Female | 177 | 77 | 120 | 88 | Yes       | Following No Exercise       | Yes |
| 58 | Male   | 178 | 78 | 115 | 95 | No        | Not Follow No Exercise      | Yes |
| 39 | Male   | 179 | 77 | 135 | 92 | Yes       | Not Follow No Exercise      | No  |
| 59 | Female | 139 | 71 | 98  | 80 | Yes       | Following Regular Exercise  | Yes |
| 64 | Male   | 165 | 77 | 121 | 78 | No        | Not Follow Regular Exercise | No  |
| 51 | Female | 167 | 75 | 131 | 89 | Yes       | Following No Exercise       | Yes |
| 66 | Male   | 156 | 73 | 101 | 81 | No        | Not Follow Regular Exercise | Yes |
| 65 | Male   | 155 | 69 | 135 | 95 | Yes       | Not Follow Occasional       | No  |
| 44 | Male   | 155 | 66 | 114 | 73 | Yes       | Not Follow Regular Exercise | Yes |
| 51 | Male   | 145 | 54 | 114 | 81 | Yes       | Following Occasional        | No  |
| 64 | Male   | 146 | 58 | 101 | 88 | Yes       | Following Regular Exercise  | Yes |
| 65 | Female | 165 | 56 | 145 | 78 | Yes       | Following Regular Exercise  | Yes |
| 52 | Female | 148 | 67 | 135 | 81 | Yes       | Following No Exercise       | No  |
| 71 | Male   | 153 | 65 | 110 | 85 | Yes       | Not Follow Occasional       | Yes |
| 65 | Female | 154 | 68 | 104 | 71 | No        | Not Follow No Exercise      | Yes |
| 67 | Male   | 165 | 69 | 119 | 92 | Yes       | Not Follow No Exercise      | No  |
| 54 | Female | 177 | 73 | 152 | 75 | Yes       | Following Regular Exercise  | Yes |
| 41 | Male   | 178 | 77 | 117 | 89 | No        | Not Follow Regular Exercise | No  |
| 29 | Female | 179 | 79 | 139 | 85 | Yes       | Following No Exercise       | Yes |
| 44 | Male   | 138 | 74 | 138 | 66 | No        | Not Follow Regular Exercise | Yes |
| 53 | Female | 165 | 55 | 101 | 77 | Yes       | Not Follow Occasional       | Yes |
| 61 | Male   | 167 | 54 | 117 | 90 | Yes       | Not Follow Regular Exercise | Yes |
| 59 | Male   | 156 | 50 | 123 | 90 | Yes       | Not Follow No Exercise      | Yes |
| 65 | Female | 155 | 51 | 135 | 84 | Yes       | Not Follow Occasional       | Yes |
| 54 | Female | 176 | 55 | 101 | 88 | Yes       | Following No Exercise       | Yes |
| 45 | Male   | 178 | 52 | 107 | 82 | Yes       | Following Regular Exercise  | No  |

|    |        |     |    |     |    |     |                       |     |
|----|--------|-----|----|-----|----|-----|-----------------------|-----|
| 46 | Female | 179 | 75 | 123 | 66 | No  | Not Follow Regular Ex | Yes |
| 62 | Female | 145 | 65 | 148 | 68 | Yes | Following No Exercis  | Yes |
| 53 | Male   | 146 | 67 | 118 | 78 | Yes | Not Follow No Exercis | No  |
| 59 | Male   | 165 | 92 | 132 | 82 | No  | Following Regular Ex  | Yes |
| 71 | Female | 155 | 88 | 109 | 92 | Yes | Following No Exercis  | Yes |
| 71 | Female | 166 | 84 | 145 | 80 | No  | Not Follow Regular Ex | Yes |
| 56 | Male   | 178 | 67 | 152 | 78 | Yes | Following No Exercis  | Yes |
| 52 | Female | 179 | 66 | 132 | 95 | Yes | Not Follow Regular Ex | No  |
| 58 | Female | 142 | 63 | 120 | 88 | No  | Not Follow Regular Ex | Yes |
| 52 | Female | 165 | 58 | 122 | 94 | Yes | Following No Exercis  | No  |
| 64 | Female | 167 | 56 | 118 | 72 | No  | Not Follow No Exercis | Yes |
| 60 | Female | 156 | 67 | 105 | 94 | Yes | Following Regular Ex  | Yes |
| 59 | Female | 155 | 58 | 120 | 87 | Yes | Following No Exercis  | Yes |
| 77 | Female | 176 | 61 | 123 | 95 | No  | Not Follow Regular Ex | No  |
| 46 | Male   | 178 | 63 | 126 | 87 | Yes | Not Follow No Exercis | Yes |
| 58 | Male   | 179 | 67 | 127 | 80 | No  | Not Follow Regular Ex | Yes |
| 60 | Female | 145 | 78 | 128 | 84 | Yes | Following Regular Ex  | No  |
| 50 | Female | 146 | 79 | 120 | 71 | No  | Not Follow No Exercis | Yes |
| 53 | Male   | 165 | 92 | 123 | 95 | No  | Following Regular Ex  | Yes |
| 58 | Male   | 155 | 54 | 124 | 78 | Yes | Occasional No Exercis | Yes |
| 58 | Male   | 152 | 55 | 125 | 75 | Yes | Not Follow Regular Ex | No  |
| 57 | Male   | 150 | 59 | 124 | 77 | Yes | Following No Exercis  | Yes |
| 50 | Male   | 151 | 61 | 120 | 82 | No  | Not Follow Regular Ex | No  |
| 46 | Male   | 145 | 61 | 90  | 88 | No  | Not Follow No Exercis | Yes |
| 54 | Male   | 149 | 89 | 93  | 85 | Yes | Following Occasional  | Yes |
| 66 | Male   | 145 | 89 | 92  | 95 | No  | Not Follow Regular Ex | Yes |
| 57 | Male   | 148 | 90 | 94  | 90 | Yes | Following No Exercis  | No  |
| 48 | Male   | 152 | 60 | 99  | 90 | No  | Not Follow Regular Ex | Yes |
| 60 | Male   | 157 | 66 | 100 | 84 | Yes | Following Regular Ex  | Yes |
| 55 | Male   | 156 | 64 | 124 | 88 | Yes | Not Follow No Exercis | No  |
| 59 | Male   | 178 | 67 | 125 | 82 | No  | Not Follow Regular Ex | Yes |
| 52 | Male   | 166 | 61 | 95  | 66 | No  | Not Follow No Exercis | Yes |
| 51 | Male   | 177 | 62 | 121 | 89 | No  | Not Follow Regular Ex | Yes |
| 55 | Male   | 168 | 67 | 130 | 95 | No  | Following No Exercis  | Yes |
| 41 | Female | 179 | 63 | 145 | 77 | No  | Not Follow Regular Ex | Yes |
| 46 | Female | 177 | 59 | 134 | 87 | Yes | Following No Exercis  | No  |
| 57 | Female | 176 | 61 | 134 | 82 | No  | Following No Exercis  | Yes |
| 57 | Female | 177 | 76 | 128 | 92 | Yes | Following Regular Ex  | Yes |
| 55 | Female | 178 | 72 | 132 | 88 | No  | Not Follow No Exercis | Yes |
| 60 | Female | 179 | 89 | 120 | 66 | Yes | Following Regular Ex  | No  |
| 49 | Female | 174 | 90 | 120 | 89 | No  | Not Follow No Exercis | Yes |
| 51 | Male   | 167 | 88 | 101 | 78 | No  | Not Follow No Exercis | Yes |
| 57 | Male   | 168 | 68 | 142 | 88 | Yes | Following Regular Ex  | No  |
| 61 | Male   | 156 | 76 | 120 | 95 | Yes | Following Regular Ex  | Yes |
| 55 | Female | 159 | 59 | 140 | 80 | No  | Not Follow No Exercis | Yes |
| 66 | Male   | 180 | 80 | 120 | 98 | Yes | Following Regular Ex  | Yes |
| 56 | Male   | 174 | 81 | 104 | 91 | Yes | Not Follow Regular Ex | No  |



|    |        |     |    |     |    |     |            |                  |     |
|----|--------|-----|----|-----|----|-----|------------|------------------|-----|
| 48 | Male   | 173 | 67 | 142 | 68 | Yes | Not Follow | No Exercise      | Yes |
| 56 | Male   | 156 | 76 | 121 | 90 | Yes | Following  | Regular Exercise | Yes |
| 63 | Male   | 154 | 68 | 99  | 70 | Yes | Following  | Regular Exercise | No  |
| 55 | Female | 154 | 69 | 118 | 75 | No  | Not Follow | No Exercise      | Yes |
| 51 | Female | 157 | 64 | 120 | 85 | No  | Following  | Regular Exercise | Yes |
| 59 | Female | 159 | 92 | 148 | 69 | No  | Following  | No Exercise      | Yes |
| 52 | Female | 140 | 90 | 119 | 75 | No  | Following  | Regular Exercise | No  |
| 64 | Male   | 152 | 89 | 101 | 81 | No  | Following  | Regular Exercise | Yes |
| 57 | Male   | 155 | 88 | 139 | 80 | Yes | Following  | Regular Exercise | Yes |
| 58 | Female | 145 | 79 | 118 | 77 | No  | Following  | Regular Exercise | No  |
| 42 | Male   | 146 | 94 | 105 | 92 | No  | Not Follow | No Exercise      | Yes |
| 67 | Male   | 165 | 79 | 121 | 82 | Yes | Following  | Regular Exercise | Yes |
| 58 | Male   | 148 | 81 | 149 | 78 | Yes | Not Follow | No Exercise      | Yes |
| 69 | Male   | 153 | 82 | 114 | 82 | No  | Not Follow | Regular Exercise | No  |
| 66 | Male   | 154 | 76 | 114 | 86 | Yes | Following  | No Exercise      | Yes |
| 65 | Female | 173 | 55 | 102 | 95 | No  | Not Follow | No Exercise      | Yes |
| 51 | Female | 156 | 52 | 128 | 92 | Yes | Not Follow | Regular Exercise | Yes |
| 46 | Female | 154 | 51 | 133 | 80 | No  | Not Follow | Regular Exercise | Yes |
| 51 | Male   | 154 | 65 | 122 | 78 | Yes | Not Follow | Regular Exercise | Yes |
| 52 | Male   | 157 | 67 | 104 | 89 | Yes | Not Follow | Regular Exercise | Yes |
| 58 | Female | 159 | 92 | 120 | 81 | Yes | Following  | No Exercise      | Yes |
| 41 | Male   | 140 | 88 | 108 | 95 | Yes | Not Follow | No Exercise      | No  |
| 43 | Female | 152 | 82 | 144 | 71 | Yes | Not Follow | Regular Exercise | Yes |
| 67 | Female | 155 | 81 | 105 | 99 | No  | Not Follow | No Exercise      | No  |
| 58 | Male   | 145 | 81 | 124 | 80 | Yes | Following  | No Exercise      | Yes |
| 62 | Female | 146 | 84 | 112 | 78 | Yes | Not Follow | Regular Exercise | Yes |
| 44 | Male   | 165 | 67 | 140 | 95 | Yes | Following  | No Exercise      | No  |
| 60 | Male   | 148 | 78 | 152 | 88 | Yes | Following  | No Exercise      | No  |
| 60 | Male   | 153 | 77 | 112 | 94 | No  | Following  | Regular Exercise | Yes |
| 57 | Female | 154 | 75 | 114 | 72 | Yes | Not Follow | Regular Exercise | Yes |
| 53 | Male   | 165 | 75 | 118 | 94 | No  | Following  | Regular Exercise | Yes |
| 56 | Female | 168 | 67 | 132 | 87 | Yes | Not Follow | Regular Exercise | Yes |
| 62 | Male   | 177 | 65 | 108 | 95 | Yes | Following  | Regular Exercise | Yes |
| 61 | Male   | 179 | 80 | 132 | 87 | Yes | Following  | No Exercise      | Yes |
| 62 | Female | 142 | 81 | 132 | 80 | Yes | Not Follow | Occasional       | Yes |
| 34 | Female | 165 | 82 | 120 | 84 | Yes | Following  | No Exercise      | No  |
| 48 | Female | 167 | 69 | 135 | 71 | No  | Not Follow | Occasional       | Yes |
| 65 | Female | 156 | 65 | 123 | 95 | Yes | Occasional | No Exercise      | No  |
| 52 | Female | 155 | 62 | 101 | 78 | Yes | Not Follow | Regular Exercise | Yes |
| 56 | Female | 176 | 61 | 141 | 75 | Yes | Not Follow | No Exercise      | Yes |
| 51 | Female | 168 | 68 | 114 | 92 | Yes | Not Follow | Regular Exercise | Yes |
| 50 | Female | 156 | 61 | 129 | 79 | Yes | Following  | No Exercise      | Yes |
| 63 | Female | 159 | 60 | 130 | 80 | No  | Not Follow | Regular Exercise | No  |
| 57 | Male   | 180 | 59 | 101 | 86 | Yes | Following  | No Exercise      | Yes |
| 44 | Male   | 174 | 54 | 105 | 69 | No  | Following  | Regular Exercise | No  |
| 54 | Female | 173 | 51 | 98  | 80 | Yes | Not Follow | Occasional       | Yes |
| 41 | Male   | 156 | 55 | 152 | 88 | Yes | Not Follow | Regular Exercise | Yes |

|    |        |     |    |     |    |     |            |            |     |
|----|--------|-----|----|-----|----|-----|------------|------------|-----|
| 40 | Male   | 154 | 51 | 145 | 90 | Yes | Following  | Regular Ex | No  |
| 61 | Female | 154 | 56 | 100 | 92 | Yes | Occasional | Regular Ex | Yes |
| 57 | Female | 157 | 46 | 122 | 98 | Yes | Following  | Regular Ex | No  |
| 51 | Male   | 159 | 70 | 102 | 95 | No  | Occasional | Occasional | Yes |
| 55 | Female | 140 | 76 | 101 | 90 | Yes | Occasional | Regular Ex | Yes |
| 47 | Male   | 152 | 77 | 145 | 85 | Yes | Occasional | Regular Ex | No  |
| 53 | Female | 155 | 65 | 109 | 88 | Yes | Following  | Regular Ex | Yes |
| 63 | Female | 145 | 67 | 120 | 89 | Yes | Not Follow | Occasional | No  |
| 59 | Female | 146 | 71 | 125 | 75 | No  | Following  | Regular Ex | Yes |
| 56 | Male   | 165 | 72 | 142 | 77 | Yes | Not Follow | Regular Ex | Yes |
| 55 | Female | 148 | 77 | 97  | 90 | No  | Not Follow | Regular Ex | No  |
| 51 | Female | 153 | 79 | 128 | 88 | Yes | Not Follow | No Exercis | Yes |
| 57 | Male   | 154 | 75 | 120 | 89 | Yes | Not Follow | Regular Ex | No  |
| 55 | Female | 159 | 71 | 134 | 70 | No  | Not Follow | Regular Ex | No  |
| 63 | Male   | 161 | 72 | 135 | 74 | Yes | Not Follow | No Exercis | No  |
| 62 | Male   | 165 | 77 | 135 | 92 | Yes | Following  | Regular Ex | Yes |
| 60 | Male   | 166 | 66 | 135 | 87 | Yes | Not Follow | No Exercis | Yes |
| 51 | Male   | 176 | 54 | 136 | 87 | Yes | Not Follow | Regular Ex | Yes |
| 57 | Male   | 171 | 58 | 136 | 66 | No  | Following  | No Exercis | Yes |
| 39 | Female | 172 | 56 | 137 | 66 | Yes | Not Follow | Regular Ex | Yes |
| 59 | Male   | 143 | 67 | 137 | 80 | Yes | Following  | No Exercis | No  |
| 42 | Female | 147 | 65 | 137 | 80 | Yes | Not Follow | Regular Ex | Yes |
| 39 | Female | 149 | 68 | 137 | 92 | Yes | Following  | No Exercis | Yes |
| 46 | Female | 156 | 69 | 137 | 82 | Yes | Not Follow | Regular Ex | Yes |
| 67 | Female | 155 | 73 | 137 | 78 | Yes | Not Follow | No Exercis | Yes |
| 60 | Male   | 154 | 77 | 137 | 70 | No  | Following  | Regular Ex | Yes |
| 67 | Male   | 152 | 79 | 138 | 90 | Yes | Following  | No Exercis | No  |
| 67 | Male   | 151 | 61 | 138 | 77 | No  | Not Follow | Regular Ex | No  |
| 77 | Female | 153 | 55 | 138 | 80 | Yes | Following  | No Exercis | Yes |
| 58 | Female | 158 | 54 | 138 | 80 | Yes | Following  | Regular Ex | Yes |
| 71 | Female | 166 | 50 | 139 | 91 | Yes | Not Follow | Regular Ex | Yes |
| 48 | Male   | 169 | 51 | 140 | 81 | Yes | Not Follow | Regular Ex | Yes |
| 52 | Female | 180 | 55 | 140 | 66 | No  | Following  | No Exercis | Yes |
| 35 | Male   | 177 | 52 | 144 | 95 | Yes | Not Follow | No Exercis | No  |
| 70 | Female | 176 | 51 | 140 | 77 | Yes | Following  | No Exercis | Yes |
| 48 | Male   | 175 | 67 | 138 | 69 | Yes | Not Follow | No Exercis | No  |
| 47 | Male   | 174 | 71 | 145 | 92 | Yes | Not Follow | Regular Ex | Yes |
| 49 | Female | 165 | 72 | 152 | 75 | Yes | Not Follow | No Exercis | Yes |
| 53 | Female | 176 | 77 | 106 | 95 | No  | Occasional | Regular Ex | Yes |
| 70 | Male   | 178 | 79 | 111 | 67 | Yes | Not Follow | Regular Ex | No  |
| 59 | Male   | 165 | 75 | 125 | 88 | No  | Occasional | Regular Ex | Yes |
| 64 | Male   | 153 | 56 | 128 | 68 | Yes | Not Follow | No Exercis | No  |
| 45 | Female | 153 | 56 | 129 | 71 | Yes | Not Follow | Regular Ex | No  |
| 51 | Female | 155 | 74 | 132 | 73 | No  | Not Follow | Occasional | Yes |
| 56 | Male   | 156 | 67 | 135 | 91 | Yes | Occasional | Regular Ex | Yes |
| 59 | Male   | 157 | 61 | 138 | 75 | No  | Occasional | Regular Ex | Yes |
| 60 | Male   | 156 | 65 | 142 | 79 | Yes | Not Follow | Regular Ex | Yes |

|    |        |     |    |     |    |           |            |            |             |
|----|--------|-----|----|-----|----|-----------|------------|------------|-------------|
| 63 | Male   | 157 | 76 | 141 | 80 | Yes       | Following  | Regular Ex | Yes         |
| 41 | Male   | 158 | 49 | 121 | 88 | Yes       | Occasional | Occasional | No          |
| 66 | Female | 159 | 49 | 128 | 90 | Yes       | Occasional | No Exercis | Yes         |
| 54 | Male   | 161 | 55 | 127 | 92 | No        | Occasional | No Exercis | Yes         |
| 43 | Male   | 165 | 51 | 129 | 98 | Yes       | Not Follow | No Exercis | Yes         |
| 52 | Male   | 166 | 58 | 132 | 95 | Yes       | Following  | No Exercis | Yes         |
| 63 | Female | 176 | 58 | 142 | 90 | Yes       | Not Follow | Regular Ex | Yes         |
| 50 | Male   | 171 | 56 | 144 | 85 | Yes       | Following  | No Exercis | No          |
| 42 | Male   | 172 | 71 | 145 | 88 | Yes       | Not Follow | Regular Ex | No          |
| 61 | Male   | 143 | 77 | 139 | 89 | Yes       | Following  | No Exercis | Yes         |
| 53 | Male   | 147 | 76 | 137 | 75 | No        | Following  | Regular Ex | Yes         |
| 55 | Female | 149 | 69 | 131 | 77 | Yes       | Not Follow | No Exercis | Yes         |
| 48 | Male   | 156 | 66 | 151 | 90 | No        | Following  | Regular Ex | Yes         |
| 67 | Male   | 155 | 72 | 121 | 88 | Yes       | Following  | No Exercis | Yes         |
| 60 | Female | 154 | 73 | 127 | 89 | Yes       | Following  | No Exercis | No          |
| 64 | Female | 152 | 52 | 125 | 92 | No        | Following  | Regular Ex | Yes         |
| 34 | Male   | 166 | 77 | 106 | 99 | Yes       | Not Follow | No Exercis | No          |
| 59 | Female | 176 | 71 | 109 | 98 | Yes       | Following  | Regular Ex | Yes         |
| 52 | Male   | 171 | 77 | 111 | 95 | Not Known | Not Follow | Occasional | Yes         |
| 57 | Female | 172 | 76 | 100 | 96 | No        | Occasional | No Exercis | No          |
| 66 | Male   | 143 | 73 | 105 | 92 | Yes       | Not Follow | Regular Ex | Yes         |
| 56 | Male   | 147 | 69 | 120 | 80 | Yes       | Not Follow | Regular Ex | Yes         |
| 54 | Female | 149 | 66 | 132 | 88 | Yes       | Occasional | Regular Ex | No          |
| 54 | Female | 156 | 86 | 125 | 87 | No        | Occasional | No Exercis | Yes         |
| 66 | Female | 155 | 81 | 124 | 85 | Yes       | Following  | Regular Ex | Yes         |
| 50 | Male   | 154 | 83 | 128 | 80 | No        | Not Follow | No Exercis | No          |
| 41 | Male   | 152 | 69 | 129 | 80 | Yes       | Not Follow | Regular Ex | Yes         |
| 63 | Female | 151 | 79 | 124 | 78 | Yes       | Following  | Regular Ex | Yes         |
| 57 | Male   | 153 | 71 | 126 | 80 | Yes       | Following  | Occasional | No          |
| 43 | Female | 158 | 71 | 121 | 78 | Yes       | Occasional | Regular Ex | During Pre; |
| 55 | Male   | 166 | 67 | 122 | 69 | Yes       | Following  | No Exercis | Yes         |
| 66 | Male   | 169 | 68 | 132 | 75 | Yes       | Following  | No Exercis | Yes         |
| 64 | Female | 179 | 66 | 130 | 81 | Yes       | Occasional | No Exercis | No          |
| 53 | Female | 177 | 67 | 131 | 80 | No        | Following  | Regular Ex | Yes         |
| 68 | Female | 176 | 60 | 123 | 77 | Yes       | Following  | No Exercis | Yes         |
| 45 | Female | 177 | 66 | 125 | 92 | Yes       | Occasional | Regular Ex | During Pre; |
| 59 | Female | 177 | 67 | 128 | 82 | Yes       | Following  | Regular Ex | Yes         |
| 71 | Female | 172 | 92 | 95  | 90 | No        | Occasional | No Exercis | No          |
| 56 | Female | 143 | 88 | 105 | 78 | No        | Not Follow | Regular Ex | No          |
| 45 | Female | 147 | 82 | 119 | 80 | No        | Occasional | No Exercis | Yes         |
| 60 | Female | 149 | 81 | 98  | 90 | Yes       | Following  | Regular Ex | Yes         |
| 49 | Male   | 156 | 81 | 104 | 67 | Yes       | Following  | No Exercis | No          |
| 65 | Male   | 155 | 84 | 117 | 80 | Yes       | Following  | Regular Ex | Yes         |
| 64 | Male   | 154 | 67 | 120 | 92 | No        | Not Follow | No Exercis | Yes         |
| 51 | Male   | 152 | 78 | 115 | 95 | No        | Occasional | Regular Ex | No          |
| 35 | Male   | 151 | 77 | 121 | 99 | Yes       | Following  | No Exercis | Yes         |
| 70 | Female | 153 | 75 | 120 | 92 | No        | Not Follow | No Exercis | Yes         |

|    |        |     |     |     |     |           |               |                  |     |
|----|--------|-----|-----|-----|-----|-----------|---------------|------------------|-----|
| 71 | Female | 158 | 75  | 123 | 85  | No        | Occasional    | No Exercise      | No  |
| 46 | Male   | 166 | 67  | 123 | 101 | No        | Occasional    | Regular Exercise | Yes |
| 41 | Male   | 173 | 65  | 123 | 88  | No        | Occasional    | Regular Exercise | Yes |
| 59 | Female | 179 | 80  | 122 | 85  | Yes       | Following     | Regular Exercise | No  |
| 66 | Female | 177 | 81  | 124 | 97  | Yes       | Following     | Regular Exercise | No  |
| 52 | Male   | 176 | 82  | 120 | 100 | No        | Not Following | No Exercise      | Yes |
| 50 | Female | 179 | 69  | 120 | 92  | Yes       | Following     | Occasional       | Yes |
| 45 | Male   | 178 | 65  | 120 | 101 | No        | Occasional    | No Exercise      | No  |
| 41 | Female | 179 | 62  | 124 | 106 | No        | Not Following | No Exercise      | Yes |
| 41 | Female | 174 | 61  | 123 | 98  | No        | Following     | Regular Exercise | Yes |
| 56 | Female | 167 | 60  | 124 | 104 | No        | Not Following | Occasional       | No  |
| 70 | Male   | 150 | 69  | 135 | 78  | Yes       | Occasional    | No Exercise      | Yes |
| 41 | Male   | 151 | 65  | 138 | 90  | Yes       | Not Following | No Exercise      | No  |
| 42 | Male   | 145 | 62  | 142 | 74  | Yes       | Not Following | Regular Exercise | Yes |
| 54 | Male   | 149 | 61  | 141 | 77  | Yes       | Not Following | Regular Exercise | Yes |
| 48 | Male   | 145 | 60  | 121 | 75  | No        | Occasional    | Regular Exercise | No  |
| 64 | Male   | 148 | 65  | 128 | 85  | No        | Occasional    | Regular Exercise | Yes |
| 77 | Male   | 152 | 61  | 127 | 87  | Yes       | Occasional    | Regular Exercise | Yes |
| 48 | Male   | 157 | 62  | 129 | 91  | Yes       | Not Following | Regular Exercise | Yes |
| 64 | Female | 156 | 59  | 132 | 85  | Yes       | Occasional    | No Exercise      | No  |
| 50 | Female | 178 | 58  | 142 | 84  | Yes       | Following     | Regular Exercise | Yes |
| 57 | Female | 173 | 81  | 144 | 79  | Yes       | Following     | No Exercise      | Yes |
| 68 | Female | 168 | 71  | 145 | 87  | Yes       | Following     | Regular Exercise | No  |
| 44 | Male   | 179 | 72  | 139 | 92  | Yes       | Not Following | Regular Exercise | Yes |
| 54 | Female | 179 | 86  | 137 | 92  | No        | Following     | Regular Exercise | Yes |
| 49 | Male   | 177 | 85  | 131 | 90  | Yes       | Not Following | Regular Exercise | No  |
| 50 | Female | 145 | 87  | 151 | 71  | Yes       | Not Following | Regular Exercise | Yes |
| 65 | Male   | 156 | 88  | 121 | 90  | Yes       | Following     | No Exercise      | Yes |
| 61 | Male   | 176 | 83  | 127 | 94  | Yes       | Occasional    | Regular Exercise | Yes |
| 53 | Male   | 179 | 45  | 125 | 88  | Yes       | Following     | Regular Exercise | No  |
| 51 | Male   | 166 | 56  | 129 | 75  | Yes       | Following     | Regular Exercise | Yes |
| 35 | Male   | 174 | 67  | 132 | 68  | No        | Occasional    | No Exercise      | Yes |
| 54 | Female | 156 | 71  | 131 | 69  | No        | Following     | Regular Exercise | No  |
| 70 | Female | 159 | 71  | 130 | 78  | Yes       | Following     | Regular Exercise | Yes |
| 54 | Female | 165 | 75  | 138 | 77  | Yes       | Occasional    | Regular Exercise | Yes |
| 66 | Female | 176 | 67  | 135 | 71  | Yes       | Following     | Regular Exercise | No  |
| 69 | Male   | 167 | 68  | 139 | 72  | Not Known | Occasional    | No Exercise      | No  |
| 69 | Male   | 152 | 68  | 139 | 74  | No        | Occasional    | No Exercise      | No  |
| 69 | Male   | 155 | 94  | 120 | 76  | No        | Following     | No Exercise      | Yes |
| 75 | Male   | 164 | 70  | 132 | 95  | Yes       | Occasional    | Occasional       | Yes |
| 75 | Male   | 166 | 70  | 142 | 92  | Not Known | Following     | Regular Exercise | Yes |
| 75 | Female | 175 | 93  | 145 | 84  | Not Known | Not Following | No Exercise      | No  |
| 75 | Female | 177 | 83  | 102 | 88  | No        | Occasional    | Occasional       | No  |
| 75 | Female | 170 | 81  | 110 | 84  | Not Known | Not Following | Regular Exercise | No  |
| 75 | Female | 167 | 104 | 108 | 78  | Not Known | Following     | No Exercise      | No  |
| 76 | Female | 169 | 54  | 128 | 90  | No        | Not Following | Regular Exercise | Yes |
| 76 | Male   | 150 | 55  | 129 | 74  | Yes       | Following     | Regular Exercise | Yes |

|    |        |     |     |     |     |           |            |                  |     |
|----|--------|-----|-----|-----|-----|-----------|------------|------------------|-----|
| 76 | Female | 175 | 85  | 135 | 77  | Not Known | Not Follow | No Exercise      | Yes |
| 76 | Male   | 174 | 80  | 138 | 75  | Not Known | Not Follow | No Exercise      | Yes |
| 76 | Female | 180 | 83  | 140 | 85  | Yes       | Following  | Occasional       | No  |
| 76 | Male   | 175 | 62  | 142 | 87  | Not Known | Occasional | Occasional       | No  |
| 76 | Female | 174 | 81  | 148 | 77  | Not Known | Occasional | Regular Exercise | No  |
| 76 | Male   | 160 | 89  | 120 | 85  | No        | Not Follow | No Exercise      | No  |
| 76 | Male   | 170 | 91  | 110 | 94  | Not Known | Not Follow | Occasional       | No  |
| 76 | Female | 180 | 80  | 120 | 95  | Not Known | Not Follow | No Exercise      | Yes |
| 76 | Female | 150 | 47  | 123 | 92  | Not Known | Not Follow | Regular Exercise | Yes |
| 76 | Female | 173 | 88  | 125 | 92  | No        | Occasional | Occasional       | No  |
| 76 | Female | 172 | 75  | 127 | 88  | Not Known | Occasional | No Exercise      | No  |
| 77 | Male   | 152 | 59  | 128 | 68  | No        | Occasional | No Exercise      | No  |
| 77 | Male   | 155 | 82  | 128 | 78  | Yes       | Occasional | No Exercise      | No  |
| 77 | Male   | 160 | 65  | 129 | 67  | No        | Not Follow | No Exercise      | No  |
| 86 | Female | 173 | 86  | 137 | 87  | No        | Occasional | No Exercise      | Yes |
| 87 | Female | 152 | 68  | 137 | 100 | Yes       | Following  | No Exercise      | Yes |
| 87 | Female | 176 | 81  | 138 | 90  | Not Known | Following  | No Exercise      | No  |
| 97 | Female | 159 | 75  | 138 | 84  | Not Known | Occasional | Occasional       | Yes |
| 88 | Female | 175 | 94  | 138 | 90  | No        | Not Follow | No Exercise      | No  |
| 93 | Male   | 160 | 112 | 138 | 96  | Yes       | Not Follow | Occasional       | No  |
| 87 | Female | 178 | 75  | 139 | 82  | No        | Following  | No Exercise      | No  |
| 85 | Female | 167 | 67  | 140 | 87  | Not Known | Not Follow | Occasional       | No  |
| 91 | Female | 177 | 70  | 140 | 79  | Yes       | Following  | Occasional       | No  |
| 91 | Female | 180 | 97  | 144 | 76  | No        | Not Follow | Occasional       | No  |
| 93 | Male   | 168 | 69  | 140 | 102 | Yes       | Following  | No Exercise      | No  |
| 84 | Female | 181 | 91  | 142 | 90  | Not Known | Following  | No Exercise      | No  |
| 88 | Female | 175 | 81  | 142 | 89  | Not Known | Not Follow | No Exercise      | Yes |
| 85 | Female | 181 | 92  | 142 | 84  | No        | Not Follow | Occasional       | Yes |
| 89 | Male   | 173 | 95  | 144 | 102 | Not Known | Not Follow | No Exercise      | Yes |
| 85 | Male   | 166 | 69  | 144 | 102 | Not Known | Not Follow | Occasional       | No  |
| 96 | Female | 170 | 64  | 144 | 78  | Not Known | Following  | No Exercise      | No  |
| 99 | Female | 174 | 85  | 145 | 72  | Yes       | Following  | No Exercise      | No  |
| 92 | Female | 160 | 59  | 145 | 75  | No        | Following  | No Exercise      | Yes |
| 92 | Female | 167 | 64  | 140 | 82  | No        | Not Follow | No Exercise      | Yes |
| 93 | Female | 167 | 82  | 152 | 87  | Not Known | Following  | No Exercise      | No  |
| 88 | Female | 168 | 81  | 147 | 88  | Not Known | Not Follow | Occasional       | No  |
| 92 | Female | 181 | 84  | 147 | 76  | Not Known | Not Follow | No Exercise      | No  |
| 62 | Male   | 179 | 83  | 120 | 90  | Yes       | Following  | Regular Exercise | Yes |
| 61 | Male   | 175 | 45  | 129 | 90  | Yes       | Following  | No Exercise      | No  |
| 64 | Male   | 174 | 56  | 131 | 90  | Yes       | Not Follow | Regular Exercise | Yes |
| 68 | Male   | 158 | 67  | 135 | 91  | Yes       | Following  | Regular Exercise | Yes |
| 51 | Male   | 158 | 71  | 134 | 95  | No        | Not Follow | No Exercise      | No  |
| 53 | Male   | 165 | 71  | 145 | 95  | Yes       | Not Follow | Regular Exercise | Yes |
| 50 | Male   | 176 | 75  | 142 | 98  | Yes       | Following  | No Exercise      | Yes |
| 58 | Male   | 178 | 67  | 111 | 83  | Yes       | Following  | Regular Exercise | Yes |
| 65 | Male   | 165 | 87  | 110 | 81  | No        | Following  | Occasional       | No  |
| 69 | Male   | 153 | 69  | 103 | 90  | Yes       | Following  | Regular Exercise | Yes |

|    |        |     |    |     |    |           |            |                              |     |
|----|--------|-----|----|-----|----|-----------|------------|------------------------------|-----|
| 60 | Male   | 153 | 67 | 102 | 90 | Yes       | Not Follow | No Exercise                  | Yes |
| 51 | Male   | 155 | 59 | 120 | 91 | No        | Not Follow | Regular Exercise             | No  |
| 64 | Male   | 156 | 81 | 125 | 90 | Yes       | Following  | No Exercise                  | Yes |
| 61 | Male   | 157 | 65 | 127 | 94 | No        | Following  | Regular Exercise             | Yes |
| 60 | Male   | 156 | 68 | 129 | 95 | Yes       | Not Follow | No Exercise                  | Yes |
| 51 | Female | 157 | 61 | 129 | 92 | Yes       | Occasional | Regular Exercise             | No  |
| 55 | Male   | 158 | 60 | 130 | 93 | Yes       | Not Follow | No Exercise                  | Yes |
| 41 | Male   | 159 | 59 | 131 | 95 | No        | Following  | Regular Exercise             | Yes |
| 56 | Male   | 161 | 54 | 134 | 95 | Yes       | Not Follow | No Exercise                  | No  |
| 57 | Female | 165 | 51 | 137 | 98 | Yes       | Not Follow | Regular Exercise             | Yes |
| 61 | Male   | 166 | 55 | 138 | 97 | Yes       | Following  | Regular Exercise             | Yes |
| 56 | Female | 176 | 51 | 139 | 86 | Yes       | Not Follow | Occasional                   | Yes |
| 42 | Female | 171 | 56 | 142 | 98 | Yes       | Occasional | Occasional During Pre;       |     |
| 60 | Female | 165 | 76 | 130 | 92 | Yes       | Following  | Regular Exercise             | Yes |
| 51 | Female | 155 | 49 | 138 | 93 | No        | Occasional | Regular Exercise             | Yes |
| 47 | Female | 152 | 49 | 134 | 91 | Yes       | Following  | Regular Exercise During Pre; |     |
| 44 | Female | 150 | 55 | 135 | 96 | Yes       | Occasional | No Exercise                  | Yes |
| 42 | Male   | 151 | 51 | 134 | 95 | No        | Occasional | Regular Exercise             | Yes |
| 53 | Female | 145 | 58 | 135 | 94 | No        | Occasional | Regular Exercise             | Yes |
| 54 | Male   | 149 | 58 | 142 | 98 | Yes       | Occasional | Regular Exercise             | No  |
| 66 | Female | 145 | 56 | 144 | 74 | No        | Following  | No Exercise                  | Yes |
| 40 | Male   | 148 | 71 | 145 | 85 | No        | Occasional | Regular Exercise             | Yes |
| 62 | Female | 152 | 77 | 143 | 88 | No        | Following  | Regular Exercise             | No  |
| 64 | Female | 157 | 76 | 147 | 71 | Not Known | Following  | Regular Exercise             | Yes |
| 49 | Female | 156 | 69 | 105 | 95 | No        | Occasional | Regular Exercise             | Yes |
| 67 | Female | 178 | 66 | 101 | 80 | Yes       | Following  | Regular Exercise             | Yes |
| 61 | Female | 173 | 72 | 109 | 80 | No        | Following  | No Exercise                  | No  |
| 44 | Female | 162 | 73 | 103 | 80 | No        | Occasional | Regular Exercise             | Yes |
| 44 | Female | 181 | 70 | 121 | 92 | No        | Following  | Regular Exercise             | Yes |
| 46 | Female | 174 | 70 | 123 | 94 | Yes       | Occasional | No Exercise During Pre;      |     |
| 50 | Female | 177 | 56 | 128 | 95 | Yes       | Following  | Regular Exercise             | Yes |
| 64 | Female | 145 | 56 | 127 | 92 | Yes       | Following  | No Exercise                  | Yes |
| 64 | Female | 156 | 51 | 125 | 91 | Yes       | Following  | Regular Exercise             | Yes |
| 62 | Female | 176 | 65 | 129 | 88 | Yes       | Following  | No Exercise                  | No  |
| 55 | Female | 181 | 65 | 132 | 84 | Yes       | Occasional | Regular Exercise             | Yes |
| 50 | Female | 175 | 62 | 142 | 78 | Yes       | Following  | Regular Exercise             | Yes |
| 57 | Male   | 174 | 69 | 145 | 90 | Yes       | Not Follow | No Exercise                  | No  |
| 48 | Male   | 168 | 70 | 102 | 74 | Yes       | Not Follow | Regular Exercise             | Yes |
| 60 | Female | 166 | 71 | 110 | 77 | Yes       | Following  | Regular Exercise             | Yes |
| 64 | Female | 165 | 81 | 108 | 75 | Yes       | Not Follow | Regular Exercise             | Yes |
| 66 | Female | 176 | 83 | 128 | 85 | Yes       | Following  | No Exercise                  | No  |
| 59 | Female | 178 | 83 | 129 | 87 | No        | Not Follow | Occasional                   | Yes |
| 63 | Female | 165 | 84 | 135 | 91 | No        | Occasional | No Exercise                  | Yes |
| 59 | Male   | 153 | 70 | 138 | 85 | No        | Not Follow | Regular Exercise             | No  |
| 58 | Female | 153 | 78 | 140 | 94 | Yes       | Not Follow | Regular Exercise             | Yes |
| 65 | Male   | 155 | 77 | 142 | 95 | Yes       | Not Follow | No Exercise                  | Yes |
| 58 | Female | 156 | 71 | 148 | 77 | No        | Occasional | Regular Exercise             | Yes |

|    |        |     |    |     |    |           |            |            |             |
|----|--------|-----|----|-----|----|-----------|------------|------------|-------------|
| 41 | Female | 157 | 77 | 120 | 92 | No        | Following  | Regular Ex | During Pre; |
| 50 | Female | 156 | 70 | 110 | 88 | No        | Not Follow | Regular Ex | Yes         |
| 45 | Male   | 157 | 73 | 99  | 68 | No        | Not Follow | Regular Ex | Yes         |
| 53 | Female | 158 | 69 | 95  | 64 | Yes       | Following  | Regular Ex | No          |
| 58 | Female | 159 | 66 | 93  | 67 | No        | Not Follow | Regular Ex | Yes         |
| 41 | Male   | 161 | 86 | 97  | 69 | Yes       | Not Follow | Regular Ex | Yes         |
| 65 | Female | 165 | 81 | 91  | 78 | Yes       | Following  | Regular Ex | Yes         |
| 61 | Male   | 166 | 83 | 96  | 88 | Not Known | Not Follow | No Exercis | No          |
| 54 | Female | 176 | 69 | 94  | 80 | Yes       | Following  | Regular Ex | Yes         |
| 44 | Male   | 171 | 70 | 90  | 83 | Yes       | Not Follow | Regular Ex | Yes         |
| 41 | Male   | 172 | 90 | 100 | 85 | No        | Not Follow | Regular Ex | No          |
| 56 | Male   | 152 | 66 | 132 | 87 | No        | Occasional | Regular Ex | Yes         |
| 53 | Male   | 155 | 67 | 111 | 90 | No        | Occasional | Regular Ex | No          |
| 52 | Male   | 145 | 60 | 120 | 95 | Yes       | Occasional | Occasional | Yes         |
| 41 | Male   | 146 | 66 | 151 | 92 | No        | Occasional | Regular Ex | Yes         |
| 63 | Male   | 165 | 67 | 142 | 97 | Yes       | Not Follow | Regular Ex | Yes         |
| 59 | Female | 148 | 64 | 123 | 90 | Yes       | Not Follow | No Exercis | Yes         |
| 44 | Male   | 153 | 72 | 132 | 97 | Yes       | Occasional | No Exercis | Yes         |
| 54 | Female | 154 | 73 | 128 | 93 | No        | Not Follow | Regular Ex | No          |
| 65 | Female | 165 | 59 | 99  | 91 | Yes       | Not Follow | Regular Ex | Yes         |
| 45 | Female | 180 | 81 | 135 | 95 | Yes       | Occasional | Regular Ex | No          |
| 64 | Female | 175 | 82 | 124 | 80 | Yes       | Not Follow | No Exercis | Yes         |
| 61 | Female | 160 | 85 | 120 | 85 | Yes       | Not Follow | No Exercis | Yes         |
| 66 | Male   | 139 | 66 | 125 | 88 | Yes       | Occasional | Regular Ex | Yes         |
| 44 | Female | 165 | 80 | 132 | 86 | Yes       | Occasional | Regular Ex | Yes         |
| 60 | Female | 167 | 52 | 125 | 87 | Yes       | Occasional | No Exercis | Yes         |
| 38 | Male   | 156 | 55 | 128 | 89 | No        | Occasional | Regular Ex | No          |
| 44 | Female | 155 | 56 | 99  | 71 | Yes       | Occasional | No Exercis | Yes         |
| 43 | Male   | 176 | 60 | 98  | 99 | Yes       | Occasional | Regular Ex | No          |
| 48 | Male   | 178 | 60 | 99  | 80 | Yes       | Not Follow | No Exercis | Yes         |
| 35 | Female | 179 | 61 | 99  | 78 | No        | Not Follow | Regular Ex | Yes         |
| 49 | Male   | 145 | 57 | 102 | 95 | Yes       | Not Follow | No Exercis | Yes         |
| 56 | Female | 172 | 83 | 108 | 89 | Yes       | Following  | Regular Ex | No          |
| 47 | Female | 143 | 84 | 107 | 92 | No        | Following  | Regular Ex | Yes         |
| 41 | Male   | 147 | 82 | 106 | 66 | Yes       | Following  | No Exercis | Yes         |
| 51 | Male   | 149 | 76 | 109 | 77 | Yes       | Following  | Regular Ex | No          |
| 47 | Female | 156 | 79 | 111 | 90 | Yes       | Following  | Regular Ex | Yes         |
| 47 | Male   | 155 | 78 | 100 | 90 | Yes       | Following  | No Exercis | Yes         |
| 54 | Female | 154 | 86 | 105 | 84 | Yes       | Following  | Regular Ex | No          |
| 67 | Female | 152 | 89 | 120 | 88 | No        | Following  | No Exercis | Yes         |
| 56 | Male   | 151 | 67 | 132 | 82 | No        | Following  | Regular Ex | No          |
| 57 | Female | 153 | 66 | 125 | 66 | Yes       | Following  | Regular Ex | Yes         |
| 43 | Male   | 158 | 63 | 124 | 89 | Yes       | Following  | No Exercis | Yes         |
| 59 | Male   | 179 | 58 | 128 | 78 | Yes       | Following  | Regular Ex | Yes         |
| 55 | Female | 181 | 56 | 129 | 82 | No        | Following  | Regular Ex | Yes         |
| 55 | Male   | 181 | 67 | 124 | 92 | Yes       | Following  | No Exercis | Yes         |
| 52 | Male   | 174 | 58 | 126 | 79 | Yes       | Following  | Regular Ex | Yes         |

|    |        |     |    |     |    |     |               |                  |     |
|----|--------|-----|----|-----|----|-----|---------------|------------------|-----|
| 53 | Male   | 176 | 61 | 121 | 80 | Yes | Following     | No Exercise      | Yes |
| 58 | Male   | 167 | 63 | 122 | 86 | Yes | Following     | Regular Exercise | No  |
| 29 | Male   | 178 | 67 | 132 | 85 | Yes | Following     | Regular Exercise | Yes |
| 71 | Female | 179 | 78 | 130 | 71 | No  | Following     | No Exercise      | Yes |
| 62 | Female | 176 | 75 | 108 | 73 | Yes | Following     | Occasional       | Yes |
| 68 | Female | 178 | 72 | 121 | 81 | Yes | Following     | No Exercise      | Yes |
| 41 | Male   | 165 | 70 | 102 | 88 | Yes | Not Following | Regular Exercise | No  |
| 57 | Female | 153 | 67 | 152 | 78 | Yes | Following     | Regular Exercise | Yes |
| 64 | Female | 153 | 66 | 121 | 81 | No  | Following     | Regular Exercise | Yes |
| 57 | Female | 155 | 79 | 142 | 85 | Yes | Following     | Regular Exercise | Yes |
| 49 | Female | 156 | 89 | 131 | 71 | No  | Occasional    | Occasional       | No  |
| 52 | Female | 157 | 90 | 148 | 84 | Yes | Following     | Regular Exercise | Yes |
| 54 | Female | 156 | 93 | 148 | 75 | Yes | Following     | Regular Exercise | Yes |
| 41 | Female | 157 | 94 | 129 | 89 | Yes | Occasional    | No Exercise      | No  |
| 62 | Female | 158 | 87 | 108 | 92 | Yes | Following     | Regular Exercise | Yes |
| 59 | Male   | 159 | 49 | 135 | 66 | Yes | Following     | No Exercise      | Yes |
| 58 | Male   | 161 | 58 | 120 | 77 | No  | Occasional    | Regular Exercise | Yes |
| 58 | Female | 165 | 84 | 140 | 80 | Yes | Following     | No Exercise      | No  |
| 50 | Female | 166 | 88 | 150 | 74 | Yes | Following     | Regular Exercise | Yes |
| 62 | Female | 176 | 94 | 112 | 84 | Yes | Occasional    | Regular Exercise | Yes |
| 45 | Male   | 171 | 91 | 142 | 88 | Yes | Not Following | No Exercise      | No  |
| 74 | Female | 172 | 68 | 130 | 82 | No  | Following     | Regular Exercise | Yes |
| 55 | Male   | 143 | 88 | 114 | 66 | Yes | Not Following | No Exercise      | Yes |
| 48 | Male   | 147 | 69 | 131 | 89 | No  | Not Following | Regular Exercise | Yes |
| 53 | Female | 149 | 81 | 142 | 78 | Yes | Following     | No Exercise      | No  |
| 60 | Female | 156 | 83 | 151 | 82 | Yes | Occasional    | No Exercise      | Yes |
| 40 | Male   | 155 | 85 | 132 | 92 | Yes | Not Following | No Exercise      | Yes |
| 63 | Male   | 154 | 76 | 138 | 79 | Yes | Occasional    | Regular Exercise | No  |
| 52 | Male   | 152 | 71 | 101 | 80 | Yes | Not Following | No Exercise      | Yes |
| 44 | Male   | 151 | 72 | 110 | 86 | No  | Not Following | Regular Exercise | No  |
| 61 | Male   | 153 | 77 | 108 | 66 | Yes | Not Following | No Exercise      | Yes |
| 48 | Female | 158 | 66 | 104 | 71 | Yes | Occasional    | Regular Exercise | Yes |



|                    |             |              |     |
|--------------------|-------------|--------------|-----|
| Non Alcoholic Low  | Regular     | Middle Class | No  |
| Non Alcoholic Low  | Regular     | High Class   | No  |
| Non Alcoholic High | Non Smoking | High Class   | No  |
| Non Alcoholic Low  | Regular     | High Class   | Yes |
| Alcoholic Low      | Occasional  | Middle Class | No  |
| Non Alcoholic High | Regular     | High Class   | Yes |
| Non Alcoholic High | Regular     | Poor         | Yes |
| Non Alcoholic Low  | Occasional  | High Class   | Yes |
| Non Alcoholic High | Regular     | Poor         | Yes |
| Non Alcoholic High | Non Smoking | Poor         | Yes |
| Non Alcoholic Low  | Regular     | High Class   | No  |
| Non Alcoholic High | Non Smoking | Poor         | Yes |
| Non Alcoholic High | Regular     | Poor         | No  |
| Alcoholic High     | Regular     | High Class   | Yes |
| Non Alcoholic High | Regular     | Middle Class | Yes |
| Occasional High    | Regular     | High Class   | No  |
| Occasional High    | Occasional  | Middle Class | Yes |
| Non Alcoholic Low  | Regular     | Middle Class | Yes |
| Non Alcoholic High | Regular     | High Class   | No  |
| Occasional High    | Occasional  | High Class   | No  |
| Non Alcoholic High | Occasional  | Middle Class | No  |
| Alcoholic Low      | Regular     | Middle Class | No  |
| Alcoholic High     | Regular     | Middle Class | Yes |
| Non Alcoholic High | Occasional  | Middle Class | No  |
| Non Alcoholic Low  | Regular     | Middle Class | Yes |
| Non Alcoholic High | Occasional  | Middle Class | Yes |
| Occasional High    | Regular     | Poor         | No  |
| Alcoholic High     | Regular     | Poor         | Yes |
| Non Alcoholic High | Occasional  | Poor         | Yes |
| Occasional High    | Regular     | Poor         | No  |
| Alcoholic High     | Regular     | High Class   | No  |
| Non Alcoholic High | Regular     | High Class   | No  |
| Occasional High    | Non Smoking | High Class   | No  |
| Alcoholic Low      | Regular     | Poor         | Yes |
| Non Alcoholic High | Regular     | High Class   | No  |
| Occasional High    | Regular     | Poor         | Yes |
| Alcoholic High     | Regular     | Middle Class | Yes |
| Non Alcoholic High | Occasional  | Middle Class | Yes |
| Occasional Low     | Regular     | Middle Class | No  |
| Alcoholic High     | Regular     | Middle Class | Yes |
| Non Alcoholic High | Regular     | Middle Class | Yes |
| Non Alcoholic High | Regular     | High Class   | No  |
| Non Alcoholic High | Non Smoking | Middle Class | Yes |
| Occasional High    | Regular     | High Class   | No  |
| Non Alcoholic High | Regular     | High Class   | No  |
| Non Alcoholic Low  | Regular     | High Class   | No  |

|                        |             |              |     |
|------------------------|-------------|--------------|-----|
| Non Alcoholic High     | Regular     | High Class   | Yes |
| Non Alcoholic Low      | Occasional  | High Class   | No  |
| Non Alcoholic High     | Regular     | Poor         | Yes |
| Occasional Low         | Regular     | High Class   | No  |
| Non Alcoholic High     | Occasional  | High Class   | Yes |
| Non Alcoholic Low      | Regular     | High Class   | Yes |
| Non Alcoholic Low      | Occasional  | High Class   | No  |
| Non Alcoholic High     | Regular     | High Class   | No  |
| Occasional Low         | Regular     | Middle Class | Yes |
| Occasional Low         | Occasional  | High Class   | No  |
| Non Alcoholic High     | Regular     | Middle Class | Yes |
| Non Alcoholic Low      | Regular     | Poor         | No  |
| Non Alcoholic High     | Regular     | High Class   | Yes |
| Occasional Low         | Occasional  | Middle Class | Yes |
| Non Alcoholic High     | Regular     | Middle Class | No  |
| Non Alcoholic High     | Regular     | High Class   | No  |
| Alcoholic High         | Regular     | Poor         | No  |
| Non Alcoholic High     | Regular     | Middle Class | Yes |
| Non Alcoholic Moderate | Occasional  | Poor         | No  |
| Non Alcoholic High     | Regular     | Poor         | Yes |
| Non Alcoholic High     | Non Smoking | Poor         | Yes |
| Non Alcoholic High     | Occasional  | Poor         | No  |
| Non Alcoholic High     | Regular     | Poor         | Yes |
| Non Alcoholic High     | Occasional  | High Class   | No  |
| Occasional High        | Regular     | Middle Class | Yes |
| Non Alcoholic Moderate | Regular     | High Class   | No  |
| Non Alcoholic Moderate | Occasional  | Middle Class | No  |
| Non Alcoholic High     | Regular     | High Class   | Yes |
| Non Alcoholic High     | Regular     | Poor         | No  |
| Non Alcoholic High     | Regular     | Middle Class | No  |
| Non Alcoholic Low      | Occasional  | Poor         | Yes |
| Non Alcoholic High     | Regular     | Middle Class | Yes |
| Non Alcoholic High     | Regular     | Poor         | Yes |
| Non Alcoholic Moderate | Regular     | Poor         | No  |
| Non Alcoholic High     | Regular     | Middle Class | No  |
| Non Alcoholic High     | Regular     | High Class   | No  |
| Non Alcoholic Moderate | Regular     | High Class   | No  |
| Non Alcoholic Low      | Regular     | Middle Class | No  |
| Non Alcoholic High     | Regular     | High Class   | Yes |
| Non Alcoholic High     | Occasional  | Middle Class | Yes |
| Non Alcoholic Moderate | Regular     | High Class   | No  |
| Non Alcoholic Low      | Regular     | Middle Class | Yes |
| Non Alcoholic High     | Occasional  | High Class   | Yes |
| Non Alcoholic High     | Regular     | Middle Class | No  |
| Non Alcoholic High     | Occasional  | High Class   | Yes |
| Non Alcoholic High     | Regular     | High Class   | No  |
| Alcoholic Moderate     | Regular     | Poor         | Yes |

|                        |            |              |     |
|------------------------|------------|--------------|-----|
| Non Alcoholic Low      | Occasional | Middle Class | Yes |
| Non Alcoholic High     | Regular    | Middle Class | Yes |
| Non Alcoholic High     | Regular    | Poor         | No  |
| Non Alcoholic Moderate | Regular    | High Class   | Yes |
| Non Alcoholic Low      | Occasional | High Class   | Yes |
| Non Alcoholic High     | Regular    | High Class   | Yes |
| Non Alcoholic High     | Regular    | High Class   | Yes |
| Non Alcoholic Moderate | Regular    | Middle Class | Yes |
| Non Alcoholic Low      | Regular    | High Class   | No  |
| Non Alcoholic High     | Regular    | Middle Class | No  |
| Occasional High        | Non Smoker | High Class   | No  |
| Non Alcoholic High     | Non Smoker | Poor         | Yes |
| Occasional High        | Occasional | High Class   | Yes |
| Non Alcoholic High     | Occasional | High Class   | No  |
| Occasional Low         | Non Smoker | Middle Class | No  |
| Alcoholic Low          | Regular    | High Class   | No  |
| Alcoholic Low          | Regular    | Poor         | No  |
| Alcoholic Low          | Regular    | High Class   | No  |
| Alcoholic Low          | Non Smoker | Poor         | Yes |
| Alcoholic Low          | Occasional | High Class   | Yes |
| Alcoholic Low          | Non Smoker | High Class   | Yes |
| Non Alcoholic Moderate | Regular    | High Class   | No  |
| Non Alcoholic Moderate | Occasional | Poor         | Yes |
| Non Alcoholic Low      | Non Smoker | High Class   | Yes |
| Non Alcoholic Low      | Non Smoker | High Class   | No  |
| Non Alcoholic Low      | Non Smoker | High Class   | Yes |
| Non Alcoholic Low      | Regular    | Middle Class | Yes |
| Alcoholic Moderate     | Regular    | Poor         | No  |
| Alcoholic Moderate     | Regular    | Poor         | No  |
| Alcoholic Moderate     | Non Smoker | High Class   | Yes |
| Alcoholic High         | Regular    | Poor         | Yes |
| Non Alcoholic High     | Occasional | Poor         | Yes |
| Non Alcoholic High     | Regular    | Poor         | No  |
| Non Alcoholic High     | Regular    | Poor         | Yes |
| Non Alcoholic Low      | Occasional | Middle Class | Yes |
| Non Alcoholic High     | Regular    | Poor         | Yes |
| Non Alcoholic High     | Occasional | Poor         | Yes |
| Non Alcoholic High     | Regular    | Middle Class | No  |
| Non Alcoholic Low      | Regular    | Poor         | Yes |
| Non Alcoholic High     | Occasional | Poor         | Yes |
| Non Alcoholic High     | Regular    | Poor         | Yes |
| Alcoholic High         | Regular    | Poor         | Yes |
| Non Alcoholic High     | Regular    | Poor         | Yes |
| Non Alcoholic Low      | Occasional | Middle Class | No  |
| Non Alcoholic High     | Regular    | Poor         | Yes |
| Non Alcoholic High     | Regular    | Poor         | Yes |
| Non Alcoholic High     | Regular    | Middle Class | Yes |

|                    |            |              |     |
|--------------------|------------|--------------|-----|
| Non Alcoholic Low  | Regular    | Poor         | Yes |
| Non Alcoholic High | Regular    | Middle Class | No  |
| Non Alcoholic High | Regular    | Poor         | Yes |
| Non Alcoholic High | Regular    | High Class   | Yes |
| Non Alcoholic High | Occasional | Poor         | No  |
| Non Alcoholic High | Regular    | Poor         | No  |
| Non Alcoholic High | Regular    | Poor         | Yes |
| Alcoholic High     | Occasional | Poor         | Yes |
| Occasional High    | Regular    | Poor         | Yes |
| Non Alcoholic High | Non Smoker | High Class   | Yes |
| Non Alcoholic High | Regular    | Poor         | Yes |
| Alcoholic High     | Regular    | Poor         | Yes |
| Non Alcoholic High | Occasional | Middle Class | Yes |
| Non Alcoholic High | Regular    | Middle Class | Yes |
| Alcoholic Low      | Regular    | High Class   | Yes |
| Non Alcoholic High | Regular    | Poor         | Yes |
| Non Alcoholic High | Occasional | Middle Class | No  |
| Occasional High    | Regular    | High Class   | No  |
| Non Alcoholic High | Regular    | Poor         | Yes |
| Occasional High    | Regular    | High Class   | Yes |
| Occasional High    | Regular    | Middle Class | Yes |
| Non Alcoholic High | Occasional | Middle Class | Yes |
| Non Alcoholic High | Regular    | Middle Class | Yes |
| Non Alcoholic High | Regular    | High Class   | Yes |
| Non Alcoholic High | Occasional | Poor         | No  |
| Non Alcoholic High | Regular    | High Class   | No  |
| Non Alcoholic High | Occasional | High Class   | No  |
| Non Alcoholic High | Regular    | Middle Class | Yes |
| Non Alcoholic High | Regular    | High Class   | No  |
| Non Alcoholic High | Occasional | Poor         | Yes |
| Non Alcoholic High | Regular    | Poor         | Yes |
| Non Alcoholic Low  | Non Smoker | Poor         | Yes |
| Non Alcoholic High | Regular    | High Class   | Yes |
| Non Alcoholic High | Regular    | Poor         | Yes |
| Non Alcoholic High | Occasional | Poor         | Yes |
| Non Alcoholic High | Regular    | High Class   | No  |
| Alcoholic High     | Non Smoker | High Class   | No  |
| Alcoholic High     | Occasional | Middle Class | Yes |
| Alcoholic High     | Regular    | High Class   | No  |
| Occasional High    | Occasional | High Class   | No  |
| Non Alcoholic Low  | Regular    | Poor         | Yes |
| Non Alcoholic High | Regular    | High Class   | No  |
| Occasional High    | Occasional | Middle Class | No  |

|                        |             |              |     |
|------------------------|-------------|--------------|-----|
| Non Alcoholic High     | Regular     | High Class   | Yes |
| Non Alcoholic High     | Regular     | High Class   | Yes |
| Occasional High        | Regular     | Poor         | Yes |
| Non Alcoholic High     | Occasional  | High Class   | Yes |
| Non Alcoholic High     | Regular     | High Class   | No  |
| Non Alcoholic High     | Regular     | High Class   | No  |
| Non Alcoholic High     | Regular     | High Class   | No  |
| Non Alcoholic High     | Regular     | High Class   | No  |
| Non Alcoholic High     | Occasional  | Middle Class | No  |
| Alcoholic Low          | Regular     | Middle Class | No  |
| Alcoholic High         | Regular     | Middle Class | Yes |
| Non Alcoholic High     | Occasional  | Middle Class | No  |
| Non Alcoholic High     | Occasional  | Middle Class | Yes |
| Non Alcoholic High     | Regular     | Poor         | Yes |
| Non Alcoholic High     | Regular     | Poor         | Yes |
| Non Alcoholic Low      | Regular     | Middle Class | Yes |
| Non Alcoholic Low      | Regular     | Poor         | Yes |
| Non Alcoholic Low      | Occasional  | Middle Class | Yes |
| Occasional Low         | Non Smoking | Middle Class | Yes |
| Non Alcoholic Low      | Regular     | Poor         | Yes |
| Non Alcoholic High     | Occasional  | Middle Class | Yes |
| Non Alcoholic High     | Regular     | Poor         | Yes |
| Non Alcoholic Moderate | Occasional  | Poor         | Yes |
| Non Alcoholic High     | Regular     | High Class   | Yes |
| Non Alcoholic High     | Regular     | Poor         | No  |
| Non Alcoholic High     | Occasional  | High Class   | No  |
| Occasional High        | Regular     | High Class   | No  |
| Non Alcoholic High     | Regular     | High Class   | Yes |
| Non Alcoholic High     | Regular     | Middle Class | No  |
| Non Alcoholic High     | Occasional  | Middle Class | No  |
| Occasional High        | Regular     | Middle Class | No  |
| Non Alcoholic High     | Regular     | Middle Class | No  |
| Non Alcoholic High     | Regular     | Middle Class | No  |
| Non Alcoholic High     | Regular     | Poor         | No  |
| Occasional High        | Occasional  | High Class   | No  |
| Non Alcoholic High     | Regular     | Middle Class | No  |
| Non Alcoholic High     | Occasional  | High Class   | Yes |
| Non Alcoholic Low      | Regular     | Poor         | Yes |
| Non Alcoholic Low      | Regular     | Poor         | No  |
| Non Alcoholic Low      | Occasional  | Poor         | No  |
| Non Alcoholic Low      | Regular     | Poor         | No  |
| Non Alcoholic High     | Regular     | Middle Class | No  |
| Non Alcoholic High     | Regular     | Middle Class | No  |
| Occasional High        | Occasional  | High Class   | No  |
| Non Alcoholic High     | Regular     | High Class   | No  |
| Non Alcoholic High     | Regular     | High Class   | No  |
| Non Alcoholic High     | Regular     | Middle Class | No  |

|                    |            |            |     |
|--------------------|------------|------------|-----|
| Non Alcoholic High | Regular    | Middle Cla | No  |
| Non Alcoholic High | Occasional | Middle Cla | No  |
| Non Alcoholic Low  | Regular    | High Class | Yes |
| Non Alcoholic High | Regular    | High Class | Yes |
| Non Alcoholic High | Occasional | Poor       | Yes |
| Non Alcoholic Low  | Regular    | Poor       | No  |
| Non Alcoholic High | Occasional | Poor       | Yes |
| Non Alcoholic Low  | Regular    | High Class | No  |
| Alcoholic Moderate | Occasional | High Class | Yes |
| Occasional High    | Regular    | High Class | No  |
| Non Alcoholic Low  | Occasional | High Class | Yes |
| Non Alcoholic Low  | Regular    | Poor       | No  |
| Non Alcoholic Low  | Regular    | High Class | Yes |
| Non Alcoholic Low  | Occasional | Middle Cla | No  |
| Non Alcoholic Low  | Regular    | Poor       | No  |
| Alcoholic Low      | Occasional | Poor       | Yes |
| Non Alcoholic Low  | Regular    | Poor       | Yes |
| Occasional High    | Regular    | Poor       | Yes |
| Non Alcoholic High | Occasional | Middle Cla | Yes |
| Non Alcoholic High | Regular    | Poor       | Yes |
| Non Alcoholic High | Regular    | High Class | Yes |
| Non Alcoholic High | Regular    | High Class | Yes |
| Non Alcoholic High | Non Smoker | Middle Cla | No  |
| Occasional High    | Regular    | Middle Cla | Yes |
| Non Alcoholic High | Regular    | Middle Cla | Yes |
| Non Alcoholic High | Regular    | Middle Cla | No  |
| Non Alcoholic High | Regular    | Middle Cla | Yes |
| Non Alcoholic Low  | Occasional | High Class | No  |
| Non Alcoholic Low  | Regular    | Middle Cla | Yes |
| Non Alcoholic High | Occasional | High Class | No  |
| Occasional High    | Regular    | Poor       | Yes |
| Non Alcoholic High | Regular    | Middle Cla | Yes |
| Non Alcoholic Low  | Occasional | Middle Cla | Yes |
| Non Alcoholic Low  | Regular    | High Class | Yes |
| Non Alcoholic High | Occasional | Poor       | No  |
| Non Alcoholic High | Regular    | Poor       | No  |
| Non Alcoholic Low  | Regular    | Poor       | No  |
| Non Alcoholic Low  | Occasional | High Class | Yes |
| Occasional Low     | Regular    | High Class | No  |
| Occasional High    | Regular    | High Class | Yes |
| Non Alcoholic High | Regular    | High Class | No  |
| Occasional High    | Occasional | High Class | No  |
| Non Alcoholic High | Regular    | Poor       | No  |
| Non Alcoholic High | Regular    | Middle Cla | No  |
| Non Alcoholic Low  | Regular    | High Class | No  |
| Non Alcoholic High | Regular    | High Class | Yes |
| Occasional Low     | Occasional | High Class | No  |

|                        |            |              |     |
|------------------------|------------|--------------|-----|
| Occasional Low         | Regular    | High Class   | Yes |
| Non Alcoholic High     | Regular    | High Class   | Yes |
| Non Alcoholic Low      | Occasional | High Class   | No  |
| Non Alcoholic High     | Regular    | High Class   | No  |
| Non Alcoholic High     | Occasional | High Class   | Yes |
| Non Alcoholic Low      | Regular    | High Class   | No  |
| Non Alcoholic High     | Occasional | High Class   | Yes |
| Occasional High        | Regular    | High Class   | Yes |
| Non Alcoholic Low      | Occasional | Poor         | No  |
| Non Alcoholic High     | Non Smoker | Poor         | Yes |
| Non Alcoholic High     | Regular    | Poor         | No  |
| Non Alcoholic High     | Occasional | Middle Class | Yes |
| Non Alcoholic High     | Regular    | Poor         | Yes |
| Non Alcoholic Low      | Regular    | Poor         | No  |
| Occasional High        | Regular    | High Class   | No  |
| Non Alcoholic Low      | Occasional | Poor         | No  |
| Non Alcoholic High     | Regular    | Poor         | Yes |
| Occasional Low         | Regular    | Middle Class | Yes |
| Non Alcoholic Low      | Regular    | Poor         | Yes |
| Non Alcoholic High     | Regular    | Poor         | Yes |
| Non Alcoholic High     | Occasional | High Class   | No  |
| Non Alcoholic High     | Regular    | Poor         | Yes |
| Occasional Low         | Regular    | Poor         | No  |
| Occasional Low         | Occasional | Middle Class | No  |
| Occasional High        | Regular    | Poor         | Yes |
| Non Alcoholic Low      | Occasional | Poor         | No  |
| Non Alcoholic High     | Regular    | Middle Class | Yes |
| Non Alcoholic Low      | Regular    | Poor         | No  |
| Non Alcoholic High     | Occasional | Poor         | Yes |
| Non Alcoholic High     | Regular    | Middle Class | No  |
| Non Alcoholic High     | Regular    | Middle Class | No  |
| Alcoholic High         | Regular    | Middle Class | No  |
| Non Alcoholic High     | Occasional | Middle Class | No  |
| Occasional Moderate    | Occasional | Middle Class | No  |
| Non Alcoholic Moderate | Regular    | Middle Class | No  |
| Non Alcoholic High     | Occasional | Poor         | Yes |
| Non Alcoholic Moderate | Regular    | Poor         | No  |
| Non Alcoholic High     | Regular    | High Class   | Yes |
| Non Alcoholic High     | Occasional | Poor         | No  |
| Non Alcoholic High     | Regular    | Poor         | Yes |
| Non Alcoholic High     | Regular    | Poor         | No  |
| Non Alcoholic High     | Regular    | Middle Class | No  |
| Non Alcoholic High     | Occasional | High Class   | Yes |
| Non Alcoholic High     | Regular    | Poor         | Yes |
| Occasional High        | Regular    | High Class   | No  |
| Non Alcoholic High     | Regular    | Middle Class | Yes |
| Non Alcoholic High     | Regular    | Poor         | No  |

|            |          |            |            |     |
|------------|----------|------------|------------|-----|
| Non Alcoh  | High     | Occasional | High Class | No  |
| Non Alcoh  | High     | Regular    | Poor       | Yes |
| Non Alcoh  | High     | Regular    | High Class | Yes |
| Non Alcoh  | High     | Occasional | Poor       | Yes |
| Occasional | High     | Regular    | High Class | No  |
| Non Alcoh  | High     | Occasional | Poor       | Yes |
| Non Alcoh  | High     | Regular    | Middle Cla | No  |
| Non Alcoh  | High     | Regular    | Middle Cla | No  |
| Non Alcoh  | High     | Occasional | Middle Cla | Yes |
| Non Alcoh  | Moderate | Regular    | Middle Cla | No  |
| Occasional | Moderate | Regular    | Middle Cla | No  |
| Non Alcoh  | High     | Regular    | Poor       | Yes |
| Non Alcoh  | High     | Occasional | High Class | No  |
| Non Alcoh  | Moderate | Regular    | Middle Cla | No  |
| Non Alcoh  | High     | Regular    | High Class | Yes |
| Non Alcoh  | High     | Regular    | Poor       | No  |
| Non Alcoh  | High     | Regular    | High Class | No  |
| Occasional | High     | Regular    | Poor       | No  |
| Non Alcoh  | Low      | Occasional | Poor       | No  |
| Non Alcoh  | High     | Regular    | High Class | Yes |
| Non Alcoh  | High     | Regular    | High Class | Yes |
| Non Alcoh  | High     | Occasional | Middle Cla | Yes |
| Non Alcoh  | High     | Regular    | High Class | No  |
| Non Alcoh  | High     | Occasional | High Class | No  |
| Non Alcoh  | High     | Regular    | Poor       | Yes |
| Non Alcoh  | High     | Regular    | High Class | No  |
| Non Alcoh  | High     | Occasional | Middle Cla | Yes |
| Non Alcoh  | Low      | Regular    | High Class | Yes |
| Non Alcoh  | High     | Regular    | High Class | Yes |
| Non Alcoh  | High     | Regular    | Poor       | No  |
| Non Alcoh  | High     | Occasional | High Class | Yes |
| Non Alcoh  | High     | Regular    | High Class | No  |
| Non Alcoh  | High     | Regular    | High Class | Yes |
| Non Alcoh  | High     | Non Smoke  | High Class | Yes |
| Non Alcoh  | High     | Regular    | High Class | No  |
| Non Alcoh  | High     | Occasional | Middle Cla | Yes |
| Non Alcoh  | High     | Regular    | Middle Cla | No  |
| Non Alcoh  | Moderate | Non Smoke  | Middle Cla | No  |
| Non Alcoh  | Low      | Occasional | Middle Cla | No  |
| Non Alcoh  | Moderate | Regular    | Middle Cla | No  |
| Non Alcoh  | High     | Occasional | Poor       | No  |
| Non Alcoh  | High     | Regular    | Poor       | No  |
| Non Alcoh  | High     | Occasional | Poor       | No  |
| Non Alcoh  | High     | Regular    | Poor       | Yes |
| Non Alcoh  | High     | Non Smoke  | Poor       | No  |
| Non Alcoh  | Moderate | Occasional | Poor       | No  |
| Non Alcoh  | Moderate | Regular    | Poor       | Yes |



|                        |             |              |     |
|------------------------|-------------|--------------|-----|
| Non Alcoholic High     | Regular     | High Class   | Yes |
| Non Alcoholic Moderate | Regular     | Middle Class | No  |
| Non Alcoholic High     | Occasional  | High Class   | Yes |
| Non Alcoholic High     | Regular     | Poor         | No  |
| Non Alcoholic High     | Regular     | Poor         | Yes |
| Occasional High        | Regular     | Poor         | No  |
| Non Alcoholic High     | Regular     | Poor         | Yes |
| Non Alcoholic Moderate | Occasional  | High Class   | No  |
| Non Alcoholic High     | Regular     | High Class   | No  |
| Non Alcoholic Moderate | Regular     | High Class   | No  |
| Non Alcoholic Moderate | Occasional  | High Class   | Yes |
| Non Alcoholic High     | Regular     | Middle Class | No  |
| Non Alcoholic High     | Occasional  | Middle Class | No  |
| Alcoholic High         | Occasional  | High Class   | No  |
| Non Alcoholic Low      | Regular     | High Class   | No  |
| Non Alcoholic High     | Non Smoking | Poor         | Yes |
| Non Alcoholic High     | Occasional  | High Class   | Yes |
| Non Alcoholic High     | Regular     | High Class   | Yes |
| Non Alcoholic High     | Regular     | Poor         | Yes |
| Non Alcoholic Low      | Non Smoking | High Class   | No  |
| Non Alcoholic High     | Occasional  | Poor         | Yes |
| Non Alcoholic Low      | Regular     | Middle Class | No  |
| Alcoholic High         | Regular     | Poor         | Yes |
| Alcoholic Low          | Regular     | Middle Class | No  |
| Non Alcoholic Low      | Regular     | Middle Class | No  |
| Non Alcoholic High     | Occasional  | Poor         | Yes |
| Non Alcoholic High     | Regular     | Poor         | Yes |
| Non Alcoholic High     | Regular     | Middle Class | No  |
| Non Alcoholic High     | Occasional  | Middle Class | Yes |
| Non Alcoholic High     | Regular     | Middle Class | Yes |
| Non Alcoholic High     | Occasional  | Middle Class | Yes |
| Non Alcoholic High     | Regular     | Middle Class | Yes |
| Non Alcoholic High     | Regular     | Poor         | Yes |
| Alcoholic Low          | Occasional  | Middle Class | Yes |
| Non Alcoholic Low      | Regular     | Middle Class | No  |
| Non Alcoholic High     | Occasional  | High Class   | No  |
| Non Alcoholic Low      | Regular     | High Class   | Yes |
| Non Alcoholic Low      | Regular     | High Class   | No  |
| Non Alcoholic High     | Occasional  | High Class   | Yes |
| Non Alcoholic High     | Regular     | High Class   | Yes |
| Non Alcoholic Low      | Regular     | Middle Class | Yes |
| Non Alcoholic Low      | Regular     | High Class   | No  |
| Occasional High        | Occasional  | Middle Class | Yes |
| Non Alcoholic High     | Regular     | Poor         | No  |
| Non Alcoholic Low      | Regular     | High Class   | Yes |
| Non Alcoholic Low      | Regular     | Middle Class | Yes |
| Non Alcoholic High     | Regular     | High Class   | No  |

|                    |                          |     |
|--------------------|--------------------------|-----|
| Non Alcoholic High | Occasional Middle Class  | Yes |
| Non Alcoholic High | Regular High Class       | Yes |
| Non Alcoholic High | Non Smoking Middle Class | No  |
| Non Alcoholic Low  | Occasional High Class    | Yes |
| Non Alcoholic Low  | Regular Middle Class     | No  |
| Occasional High    | Occasional High Class    | Yes |
| Non Alcoholic High | Regular Poor             | Yes |
| Non Alcoholic High | Regular Poor             | Yes |
| Non Alcoholic High | Occasional High Class    | Yes |
| Non Alcoholic High | Regular High Class       | Yes |
| Non Alcoholic High | Regular Poor             | Yes |
| Non Alcoholic High | Regular Poor             | No  |
| Non Alcoholic High | Occasional Poor          | Yes |
| Non Alcoholic High | Regular Poor             | Yes |
| Occasional High    | Regular Poor             | Yes |
| Non Alcoholic High | Regular Poor             | No  |
| Non Alcoholic High | Occasional High Class    | No  |
| Non Alcoholic High | Regular High Class       | Yes |
| Non Alcoholic High | Regular High Class       | No  |
| Non Alcoholic High | Occasional High Class    | Yes |
| Non Alcoholic Low  | Regular Middle Class     | No  |
| Non Alcoholic High | Occasional High Class    | No  |
| Non Alcoholic Low  | Regular High Class       | Yes |
| Non Alcoholic Low  | Regular Poor             | Yes |
| Non Alcoholic High | Occasional High Class    | Yes |
| Non Alcoholic High | Regular High Class       | No  |
| Alcoholic Low      | Regular Middle Class     | No  |
| Non Alcoholic Low  | Regular High Class       | Yes |
| Non Alcoholic High | Occasional Middle Class  | Yes |
| Alcoholic High     | Regular High Class       | No  |
| Non Alcoholic Low  | Regular High Class       | Yes |
| Non Alcoholic Low  | Regular Poor             | Yes |
| Non Alcoholic High | Regular High Class       | No  |
| Non Alcoholic High | Regular High Class       | No  |
| Non Alcoholic Low  | Regular Poor             | Yes |
| Non Alcoholic Low  | Regular High Class       | No  |
| Non Alcoholic High | Regular High Class       | Yes |
| Non Alcoholic Low  | Regular Poor             | No  |
| Non Alcoholic High | Regular High Class       | Yes |
| Non Alcoholic High | Regular High Class       | No  |
| Non Alcoholic High | Occasional High Class    | Yes |
| Occasional Low     | Regular High Class       | Yes |
| Non Alcoholic Low  | Regular Poor             | Yes |
| Non Alcoholic High | Occasional Poor          | Yes |
| Non Alcoholic High | Regular High Class       | No  |
| Non Alcoholic High | Occasional High Class    | Yes |
| Non Alcoholic Low  | Regular High Class       | Yes |

|                        |            |              |     |
|------------------------|------------|--------------|-----|
| Non Alcoholic High     | Regular    | High Class   | No  |
| Non Alcoholic High     | Occasional | High Class   | Yes |
| Occasional High        | Regular    | High Class   | No  |
| Non Alcoholic Low      | Regular    | Poor         | Yes |
| Non Alcoholic High     | Regular    | Poor         | Yes |
| Non Alcoholic High     | Occasional | High Class   | No  |
| Non Alcoholic High     | Regular    | Poor         | Yes |
| Non Alcoholic Low      | Regular    | High Class   | No  |
| Non Alcoholic High     | Regular    | High Class   | No  |
| Non Alcoholic High     | Regular    | High Class   | Yes |
| Non Alcoholic Low      | Regular    | Middle Class | No  |
| Non Alcoholic High     | Regular    | Poor         | Yes |
| Non Alcoholic High     | Occasional | High Class   | Yes |
| Occasional High        | Regular    | High Class   | No  |
| Non Alcoholic High     | Regular    | High Class   | No  |
| Non Alcoholic High     | Regular    | High Class   | Yes |
| Non Alcoholic Low      | Regular    | Middle Class | Yes |
| Non Alcoholic High     | Regular    | Poor         | Yes |
| Non Alcoholic High     | Occasional | Poor         | Yes |
| Non Alcoholic High     | Regular    | Poor         | Yes |
| Non Alcoholic High     | Regular    | High Class   | No  |
| Non Alcoholic High     | Regular    | Poor         | Yes |
| Non Alcoholic High     | Regular    | Middle Class | Yes |
| Non Alcoholic High     | Regular    | Middle Class | Yes |
| Non Alcoholic Low      | Regular    | Poor         | Yes |
| Non Alcoholic High     | Regular    | Poor         | Yes |
| Non Alcoholic High     | Regular    | High Class   | Yes |
| Non Alcoholic High     | Occasional | High Class   | No  |
| Non Alcoholic High     | Regular    | High Class   | Yes |
| Non Alcoholic High     | Regular    | High Class   | Yes |
| Non Alcoholic Low      | Occasional | Middle Class | Yes |
| Non Alcoholic High     | Regular    | High Class   | No  |
| Non Alcoholic High     | Occasional | Middle Class | Yes |
| Non Alcoholic High     | Regular    | High Class   | No  |
| Non Alcoholic High     | Regular    | Middle Class | No  |
| Non Alcoholic Low      | Occasional | High Class   | Yes |
| Non Alcoholic High     | Regular    | Middle Class | No  |
| Occasional High        | Regular    | Poor         | Yes |
| Alcoholic Moderate     | Occasional | Middle Class | No  |
| Alcoholic Moderate     | Occasional | Poor         | No  |
| Alcoholic Low          | Occasional | Poor         | No  |
| Alcoholic Moderate     | Occasional | Poor         | No  |
| Non Alcoholic Moderate | Occasional | Middle Class | No  |
| Occasional Low         | Non Smoker | Poor         | Yes |
| Alcoholic Low          | Regular    | Poor         | Yes |
| Non Alcoholic Low      | Regular    | Middle Class | Yes |
| Occasional Low         | Regular    | Middle Class | Yes |
| Alcoholic Low          | Non Smoker | Poor         | Yes |
| Alcoholic Low          | Non Smoker | Poor         | No  |

|               |          |            |              |     |
|---------------|----------|------------|--------------|-----|
| Alcoholic     | Low      | Non Smoke  | High Class   | Yes |
| Non Alcoholic | Low      | Regular    | High Class   | No  |
| Non Alcoholic | Moderate | Regular    | High Class   | No  |
| Non Alcoholic | Moderate | Regular    | Poor         | No  |
| Non Alcoholic | Moderate | Regular    | Poor         | Yes |
| Non Alcoholic | Moderate | Regular    | Poor         | No  |
| Occasional    | Low      | Regular    | High Class   | No  |
| Occasional    | Low      | Regular    | Middle Class | Yes |
| Occasional    | Low      | Regular    | Poor         | Yes |
| Non Alcoholic | Low      | Regular    | Middle Class | Yes |
| Alcoholic     | Low      | Regular    | Middle Class | Yes |
| Occasional    | Low      | Occasional | Poor         | No  |
| Occasional    | Low      | Occasional | Poor         | No  |
| Occasional    | Low      | Regular    | Poor         | No  |
| Alcoholic     | High     | Non Smoke  | High Class   | Yes |
| Alcoholic     | Low      | Regular    | Middle Class | Yes |
| Non Alcoholic | Low      | Regular    | High Class   | Yes |
| Non Alcoholic | Low      | Regular    | Middle Class | Yes |
| Non Alcoholic | Low      | Non Smoke  | Poor         | Yes |
| Non Alcoholic | High     | Non Smoke  | High Class   | Yes |
| Non Alcoholic | Low      | Regular    | Middle Class | Yes |
| Alcoholic     | Low      | Regular    | High Class   | Yes |
| Occasional    | Moderate | Non Smoke  | High Class   | Yes |
| Occasional    | Low      | Occasional | High Class   | Yes |
| Non Alcoholic | High     | Non Smoke  | High Class   | Yes |
| Non Alcoholic | Low      | Non Smoke  | Poor         | Yes |
| Non Alcoholic | Low      | Occasional | Poor         | Yes |
| Alcoholic     | Low      | Regular    | High Class   | Yes |
| Non Alcoholic | Low      | Non Smoke  | Poor         | Yes |
| Alcoholic     | Low      | Regular    | High Class   | Yes |
| Non Alcoholic | High     | Non Smoke  | Poor         | Yes |
| Non Alcoholic | Low      | Non Smoke  | High Class   | Yes |
| Occasional    | Low      | Occasional | High Class   | Yes |
| Occasional    | Moderate | Occasional | Poor         | Yes |
| Non Alcoholic | High     | Non Smoke  | High Class   | Yes |
| Non Alcoholic | Low      | Occasional | High Class   | Yes |
| Occasional    | Moderate | Non Smoke  | High Class   | Yes |
| Non Alcoholic | High     | Regular    | Middle Class | Yes |
| Non Alcoholic | High     | Occasional | High Class   | Yes |
| Non Alcoholic | High     | Regular    | Middle Class | Yes |
| Non Alcoholic | Low      | Regular    | High Class   | Yes |
| Non Alcoholic | High     | Regular    | Middle Class | No  |
| Non Alcoholic | High     | Occasional | Poor         | Yes |
| Occasional    | High     | Regular    | Middle Class | Yes |
| Non Alcoholic | High     | Regular    | Poor         | Yes |
| Non Alcoholic | Low      | Regular    | Poor         | No  |
| Non Alcoholic | High     | Regular    | Poor         | Yes |

|                        |            |              |     |
|------------------------|------------|--------------|-----|
| Non Alcoholic High     | Regular    | Poor         | No  |
| Alcoholic High         | Regular    | Poor         | No  |
| Non Alcoholic Low      | Regular    | Poor         | Yes |
| Non Alcoholic High     | Regular    | Middle Class | Yes |
| Non Alcoholic High     | Occasional | Middle Class | Yes |
| Non Alcoholic High     | Regular    | Middle Class | No  |
| Non Alcoholic High     | Regular    | Middle Class | Yes |
| Non Alcoholic Low      | Occasional | Middle Class | Yes |
| Non Alcoholic High     | Regular    | Middle Class | Yes |
| Non Alcoholic High     | Occasional | Middle Class | Yes |
| Non Alcoholic High     | Regular    | Middle Class | Yes |
| Non Alcoholic Low      | Regular    | Middle Class | Yes |
| Non Alcoholic High     | Occasional | Middle Class | No  |
| Non Alcoholic High     | Regular    | Poor         | Yes |
| Non Alcoholic Moderate | Regular    | Poor         | No  |
| Non Alcoholic Low      | Regular    | Poor         | Yes |
| Non Alcoholic High     | Regular    | Middle Class | No  |
| Non Alcoholic Moderate | Regular    | Middle Class | No  |
| Non Alcoholic High     | Occasional | Middle Class | No  |
| Alcoholic Low          | Regular    | Middle Class | No  |
| Non Alcoholic High     | Regular    | Poor         | Yes |
| Non Alcoholic High     | Occasional | Poor         | No  |
| Non Alcoholic High     | Regular    | Poor         | Yes |
| Non Alcoholic Moderate | Occasional | Poor         | Yes |
| Non Alcoholic Low      | Regular    | Poor         | No  |
| Non Alcoholic High     | Regular    | Middle Class | Yes |
| Non Alcoholic Moderate | Occasional | Middle Class | No  |
| Non Alcoholic High     | Regular    | Poor         | Yes |
| Non Alcoholic Low      | Regular    | Middle Class | Yes |
| Non Alcoholic High     | Regular    | Poor         | No  |
| Alcoholic High         | Occasional | Poor         | Yes |
| Non Alcoholic High     | Regular    | Poor         | Yes |
| Non Alcoholic Low      | Regular    | Poor         | Yes |
| Non Alcoholic Low      | Non Smoker | Poor         | Yes |
| Non Alcoholic High     | Regular    | Poor         | No  |
| Non Alcoholic Moderate | Regular    | Poor         | Yes |
| Non Alcoholic High     | Regular    | High Class   | Yes |
| Non Alcoholic Low      | Regular    | High Class   | No  |
| Non Alcoholic High     | Regular    | Poor         | Yes |
| Non Alcoholic High     | Non Smoker | Poor         | Yes |
| Non Alcoholic High     | Regular    | Poor         | Yes |
| Non Alcoholic Moderate | Regular    | Poor         | Yes |
| Non Alcoholic Low      | Occasional | High Class   | Yes |
| Occasional High        | Regular    | High Class   | No  |
| Non Alcoholic Moderate | Occasional | Poor         | Yes |
| Non Alcoholic High     | Regular    | Middle Class | Yes |
| Non Alcoholic Low      | Regular    | Poor         | Yes |

|                        |             |              |     |
|------------------------|-------------|--------------|-----|
| Non Alcoholic High     | Occasional  | Poor         | Yes |
| Non Alcoholic High     | Regular     | Middle Class | Yes |
| Non Alcoholic High     | Regular     | Middle Class | No  |
| Non Alcoholic Moderate | Regular     | Poor         | Yes |
| Non Alcoholic Moderate | Occasional  | Poor         | Yes |
| Occasional High        | Regular     | Poor         | No  |
| Non Alcoholic High     | Regular     | Middle Class | Yes |
| Non Alcoholic High     | Regular     | High Class   | No  |
| Non Alcoholic High     | Regular     | Poor         | Yes |
| Non Alcoholic High     | Regular     | High Class   | No  |
| Non Alcoholic High     | Regular     | Middle Class | No  |
| Occasional High        | Non Smoking | Middle Class | No  |
| Non Alcoholic High     | Regular     | Middle Class | No  |
| Non Alcoholic High     | Occasional  | Middle Class | No  |
| Non Alcoholic High     | Regular     | Middle Class | No  |
| Non Alcoholic High     | Regular     | Middle Class | Yes |
| Non Alcoholic High     | Occasional  | High Class   | Yes |
| Alcoholic High         | Regular     | Middle Class | No  |
| Non Alcoholic High     | Regular     | Poor         | Yes |
| Non Alcoholic High     | Regular     | High Class   | Yes |
| Non Alcoholic High     | Occasional  | Poor         | No  |
| Non Alcoholic High     | Regular     | Middle Class | Yes |
| Non Alcoholic High     | Regular     | High Class   | Yes |
| Non Alcoholic High     | Regular     | Middle Class | No  |
| Occasional High        | Regular     | Poor         | No  |
| Non Alcoholic High     | Occasional  | Poor         | Yes |
| Non Alcoholic High     | Regular     | Middle Class | No  |
| Non Alcoholic High     | Regular     | Middle Class | Yes |
| Occasional High        | Occasional  | Middle Class | Yes |
| Alcoholic High         | Regular     | High Class   | Yes |
| Alcoholic High         | Occasional  | High Class   | Yes |
| Non Alcoholic High     | Regular     | High Class   | Yes |
| Non Alcoholic High     | Regular     | High Class   | No  |
| Non Alcoholic High     | Regular     | High Class   | Yes |
| Non Alcoholic High     | Occasional  | Middle Class | No  |
| Non Alcoholic High     | Regular     | Middle Class | No  |
| Non Alcoholic High     | Regular     | Middle Class | Yes |
| Occasional High        | Occasional  | Middle Class | No  |
| Occasional High        | Non Smoking | Middle Class | Yes |
| Non Alcoholic High     | Occasional  | Middle Class | Yes |
| Non Alcoholic High     | Regular     | Poor         | No  |
| Non Alcoholic High     | Regular     | Poor         | Yes |
| Non Alcoholic High     | Occasional  | Poor         | No  |
| Non Alcoholic High     | Regular     | Poor         | Yes |
| Non Alcoholic High     | Regular     | High Class   | No  |
| Non Alcoholic High     | Regular     | High Class   | No  |
| Occasional Low         | Occasional  | High Class   | No  |

|                        |            |              |     |
|------------------------|------------|--------------|-----|
| Non Alcoholic High     | Non Smoker | Poor         | No  |
| Non Alcoholic High     | Regular    | High Class   | Yes |
| Non Alcoholic High     | Regular    | Poor         | No  |
| Occasional High        | Regular    | Middle Class | No  |
| Non Alcoholic High     | Occasional | High Class   | Yes |
| Non Alcoholic Moderate | Regular    | Poor         | Yes |
| Non Alcoholic Moderate | Regular    | Poor         | No  |
| Non Alcoholic Moderate | Occasional | Poor         | Yes |
| Non Alcoholic High     | Regular    | Poor         | No  |
| Non Alcoholic High     | Regular    | Middle Class | Yes |
| Non Alcoholic High     | Regular    | Middle Class | No  |
| Non Alcoholic High     | Occasional | Poor         | Yes |
| Non Alcoholic High     | Regular    | High Class   | Yes |
| Occasional High        | Regular    | High Class   | No  |
| Non Alcoholic Low      | Regular    | Middle Class | Yes |
| Non Alcoholic High     | Non Smoker | High Class   | No  |
| Alcoholic High         | Occasional | Poor         | No  |
| Non Alcoholic Low      | Regular    | Poor         | Yes |
| Non Alcoholic High     | Regular    | Poor         | Yes |
| Non Alcoholic High     | Occasional | Poor         | No  |
| Non Alcoholic Moderate | Regular    | Poor         | Yes |
| Non Alcoholic High     | Occasional | High Class   | No  |
| Non Alcoholic High     | Regular    | Poor         | No  |
| Non Alcoholic High     | Regular    | Poor         | No  |
| Non Alcoholic High     | Occasional | Middle Class | Yes |
| Non Alcoholic High     | Regular    | Middle Class | Yes |
| Non Alcoholic Moderate | Regular    | High Class   | Yes |
| Non Alcoholic High     | Regular    | Poor         | Yes |
| Non Alcoholic Moderate | Occasional | Middle Class | No  |
| Non Alcoholic High     | Regular    | High Class   | No  |
| Non Alcoholic Moderate | Regular    | Poor         | No  |
| Occasional High        | Regular    | High Class   | Yes |

|    |        |     |    |     |    |           |            |            |            |
|----|--------|-----|----|-----|----|-----------|------------|------------|------------|
| 73 | Male   | 176 | 70 | 107 | 69 | Yes       | Occasional | Occasional | No         |
| 25 | Female | 174 | 70 | 91  | 78 | No        | Following  | Regular Ex | No         |
| 35 | Female | 159 | 78 | 109 | 81 | No        | Following  | No Exercis | During Pre |
| 40 | Female | 154 | 50 | 142 | 68 | Yes       | Occasional | Regular Ex | During Pre |
| 40 | Male   | 155 | 56 | 104 | 88 | No        | Following  | No Exercis | Yes        |
| 76 | Female | 162 | 78 | 98  | 82 | No        | Occasional | Occasional | Yes        |
| 40 | Female | 174 | 60 | 121 | 71 | Yes       | Following  | Regular Ex | During Pre |
| 40 | Male   | 172 | 61 | 145 | 92 | No        | Occasional | Occasional | No         |
| 38 | Female | 152 | 45 | 152 | 88 | Yes       | Following  | No Exercis | Yes        |
| 50 | Male   | 180 | 80 | 152 | 73 | No        | Following  | Regular Ex | Yes        |
| 35 | Male   | 165 | 88 | 120 | 88 | No        | Following  | Regular Ex | No         |
| 26 | Male   | 145 | 49 | 121 | 81 | Yes       | Following  | Regular Ex | No         |
| 72 | Male   | 179 | 70 | 99  | 85 | Not Known | Not Follow | Regular Ex | No         |
| 72 | Female | 152 | 77 | 95  | 71 | No        | Not Follow | No Exercis | Yes        |
| 35 | Male   | 155 | 54 | 121 | 77 | Yes       | Occasional | Regular Ex | Yes        |
| 26 | Female | 159 | 68 | 142 | 90 | No        | Not Follow | Occasional | No         |
| 50 | Female | 157 | 51 | 149 | 88 | No        | Following  | No Exercis | No         |
| 50 | Male   | 146 | 41 | 129 | 82 | Not Known | Occasional | Regular Ex | Yes        |
| 24 | Female | 143 | 55 | 96  | 61 | No        | Not Follow | Regular Ex | No         |
| 69 | Female | 162 | 50 | 135 | 89 | Yes       | Following  | Regular Ex | Yes        |
| 35 | Male   | 157 | 53 | 120 | 78 | No        | Following  | Occasional | Yes        |
| 29 | Male   | 156 | 59 | 150 | 92 | No        | Following  | No Exercis | No         |
| 50 | Female | 142 | 60 | 135 | 86 | No        | Occasional | Occasional | No         |
| 50 | Male   | 167 | 62 | 131 | 71 | Yes       | Occasional | Regular Ex | Yes        |
| 23 | Female | 168 | 70 | 92  | 66 | No        | Occasional | Regular Ex | No         |
| 74 | Female | 170 | 78 | 138 | 80 | Yes       | Not Follow | No Exercis | Yes        |
| 39 | Female | 155 | 75 | 101 | 85 | No        | Occasional | Occasional | No         |
| 39 | Male   | 177 | 60 | 108 | 75 | Not Known | Following  | Regular Ex | Yes        |
| 23 | Female | 143 | 50 | 91  | 65 | Not Known | Not Follow | Regular Ex | No         |
| 37 | Female | 180 | 66 | 145 | 77 | No        | Not Follow | Occasional | Yes        |
| 78 | Female | 148 | 54 | 110 | 68 | Not Known | Occasional | No Exercis | Yes        |
| 26 | Male   | 172 | 72 | 132 | 77 | No        | Not Follow | Regular Ex | Yes        |
| 37 | Female | 145 | 48 | 118 | 78 | Yes       | Occasional | No Exercis | No         |
| 79 | Male   | 153 | 57 | 131 | 78 | No        | Not Follow | No Exercis | No         |
| 27 | Male   | 154 | 49 | 102 | 66 | No        | Not Follow | Occasional | No         |
| 82 | Female | 152 | 55 | 128 | 80 | No        | Occasional | No Exercis | No         |
| 23 | Male   | 176 | 85 | 93  | 72 | Yes       | Occasional | Regular Ex | No         |
| 31 | Male   | 174 | 72 | 104 | 80 | No        | Not Follow | No Exercis | No         |
| 34 | Female | 152 | 48 | 120 | 90 | No        | Occasional | Regular Ex | No         |
| 80 | Female | 155 | 52 | 105 | 98 | Not Known | Following  | No Exercis | No         |
| 38 | Female | 168 | 71 | 124 | 80 | Not Known | Occasional | No Exercis | Yes        |
| 37 | Male   | 156 | 62 | 112 | 71 | Yes       | Following  | Regular Ex | No         |
| 26 | Female | 162 | 83 | 152 | 95 | Yes       | Following  | Occasional | Yes        |
| 26 | Female | 160 | 55 | 112 | 95 | No        | Following  | Regular Ex | Yes        |
| 28 | Male   | 164 | 87 | 114 | 78 | Yes       | Occasional | Occasional | No         |
| 34 | Female | 155 | 59 | 118 | 70 | Not Known | Following  | Occasional | No         |
| 28 | Female | 162 | 84 | 132 | 66 | No        | Following  | No Exercis | Yes        |



|    |        |     |     |     |    |           |               |                  |             |
|----|--------|-----|-----|-----|----|-----------|---------------|------------------|-------------|
| 34 | Female | 168 | 56  | 108 | 84 | No        | Following     | No Exercise      | No          |
| 34 | Female | 165 | 87  | 132 | 71 | Yes       | Not Following | No Exercise      | Yes         |
| 22 | Female | 143 | 52  | 93  | 64 | No        | Following     | Occasional       | No          |
| 80 | Male   | 167 | 62  | 123 | 80 | Not Known | Following     | No Exercise      | No          |
| 24 | Female | 153 | 74  | 91  | 77 | Not Known | Following     | Regular Exercise | No          |
| 24 | Male   | 178 | 88  | 99  | 76 | No        | Following     | No Exercise      | No          |
| 34 | Female | 153 | 56  | 132 | 86 | Yes       | Not Following | Occasional       | Yes         |
| 34 | Female | 154 | 58  | 118 | 90 | No        | Occasional    | Occasional       | Yes         |
| 24 | Female | 146 | 62  | 90  | 90 | No        | Occasional    | Occasional       | During Pre; |
| 82 | Female | 174 | 60  | 114 | 90 | Not Known | Not Following | Occasional       | Yes         |
| 24 | Male   | 168 | 60  | 92  | 80 | Yes       | Not Following | Regular Exercise | No          |
| 81 | Female | 150 | 55  | 138 | 98 | Not Known | Following     | Occasional       | No          |
| 28 | Male   | 166 | 70  | 114 | 83 | Not Known | Following     | No Exercise      | No          |
| 29 | Male   | 173 | 90  | 129 | 78 | No        | Not Following | No Exercise      | Yes         |
| 29 | Male   | 175 | 67  | 130 | 86 | Yes       | Following     | Occasional       | No          |
| 30 | Male   | 166 | 90  | 105 | 88 | No        | Not Following | No Exercise      | No          |
| 30 | Male   | 168 | 68  | 154 | 88 | No        | Following     | Occasional       | Yes         |
| 29 | Female | 152 | 51  | 152 | 70 | Yes       | Following     | Regular Exercise | Yes         |
| 25 | Male   | 174 | 86  | 94  | 74 | Yes       | Following     | No Exercise      | No          |
| 25 | Male   | 158 | 62  | 92  | 82 | Yes       | Not Following | Occasional       | No          |
| 25 | Female | 172 | 71  | 93  | 84 | No        | Not Following | No Exercise      | During Pre; |
| 25 | Male   | 176 | 90  | 92  | 80 | No        | Not Following | No Exercise      | Yes         |
| 25 | Female | 167 | 65  | 100 | 80 | No        | Not Following | Regular Exercise | During Pre; |
| 25 | Male   | 165 | 64  | 93  | 83 | No        | Not Following | Occasional       | Yes         |
| 25 | Female | 157 | 61  | 94  | 87 | No        | Following     | Regular Exercise | During Pre; |
| 25 | Female | 155 | 62  | 97  | 82 | No        | Following     | Regular Exercise | No          |
| 27 | Female | 170 | 68  | 100 | 80 | No        | Following     | Regular Exercise | Yes         |
| 27 | Female | 176 | 88  | 127 | 98 | Not Known | Following     | No Exercise      | No          |
| 27 | Female | 153 | 52  | 109 | 81 | No        | Occasional    | No Exercise      | No          |
| 25 | Female | 157 | 71  | 152 | 66 | Yes       | Following     | Regular Exercise | No          |
| 29 | Female | 152 | 75  | 152 | 87 | No        | Following     | Occasional       | Yes         |
| 29 | Female | 158 | 60  | 145 | 82 | No        | Following     | Occasional       | No          |
| 29 | Female | 152 | 58  | 128 | 92 | Yes       | Following     | Regular Exercise | No          |
| 30 | Female | 153 | 52  | 120 | 88 | No        | Occasional    | No Exercise      | No          |
| 30 | Female | 158 | 55  | 142 | 89 | Yes       | Following     | Regular Exercise | During Pre; |
| 25 | Female | 148 | 53  | 92  | 78 | Yes       | Following     | Regular Exercise | Yes         |
| 32 | Male   | 170 | 75  | 118 | 88 | Not Known | Occasional    | No Exercise      | No          |
| 32 | Male   | 176 | 101 | 106 | 95 | No        | Following     | Regular Exercise | Yes         |
| 33 | Female | 165 | 72  | 114 | 91 | Yes       | Occasional    | Occasional       | During Pre; |
| 33 | Male   | 180 | 85  | 118 | 68 | No        | Following     | Regular Exercise | Yes         |
| 33 | Male   | 152 | 55  | 110 | 90 | No        | Following     | No Exercise      | Yes         |
| 36 | Female | 158 | 75  | 128 | 75 | Yes       | Occasional    | Regular Exercise | Yes         |
| 36 | Male   | 180 | 105 | 128 | 85 | Not Known | Following     | No Exercise      | No          |
| 33 | Male   | 180 | 102 | 99  | 69 | Yes       | Following     | Regular Exercise | No          |
| 36 | Female | 174 | 98  | 130 | 75 | No        | Following     | Regular Exercise | Yes         |
| 75 | Female | 180 | 64  | 109 | 77 | Not Known | Following     | No Exercise      | No          |
| 23 | Male   | 179 | 100 | 94  | 67 | Not Known | Occasional    | Regular Exercise | No          |

|    |        |     |     |     |    |           |            |                  |             |
|----|--------|-----|-----|-----|----|-----------|------------|------------------|-------------|
| 23 | Female | 148 | 62  | 95  | 71 | No        | Occasional | No Exercise      | Yes         |
| 34 | Female | 171 | 94  | 122 | 82 | Yes       | Following  | Regular Exercise | During Pre; |
| 43 | Female | 175 | 90  | 120 | 94 | No        | Following  | Occasional       | During Pre; |
| 43 | Male   | 156 | 74  | 118 | 92 | Yes       | Occasional | No Exercise      | Yes         |
| 44 | Male   | 170 | 73  | 152 | 72 | Yes       | Occasional | No Exercise      | No          |
| 45 | Female | 178 | 98  | 134 | 79 | No        | Following  | No Exercise      | During Pre; |
| 47 | Female | 178 | 101 | 137 | 83 | No        | Following  | No Exercise      | During Pre; |
| 47 | Female | 181 | 91  | 141 | 88 | No        | Occasional | Regular Exercise | During Pre; |
| 49 | Male   | 157 | 94  | 122 | 66 | No        | Following  | Regular Exercise | No          |
| 49 | Female | 180 | 101 | 132 | 86 | No        | Occasional | No Exercise      | Yes         |
| 50 | Male   | 178 | 94  | 121 | 85 | No        | Occasional | No Exercise      | No          |
| 50 | Female | 172 | 60  | 142 | 79 | No        | Occasional | Regular Exercise | Yes         |
| 50 | Female | 170 | 94  | 138 | 72 | No        | Following  | Occasional       | No          |
| 52 | Female | 176 | 97  | 125 | 77 | Yes       | Occasional | No Exercise      | No          |
| 52 | Female | 175 | 102 | 128 | 78 | No        | Not Follow | Regular Exercise | During Pre; |
| 52 | Male   | 173 | 93  | 121 | 80 | Yes       | Occasional | Occasional       | No          |
| 52 | Female | 174 | 91  | 104 | 87 | No        | Following  | Regular Exercise | No          |
| 54 | Female | 181 | 93  | 132 | 89 | No        | Following  | Regular Exercise | No          |
| 55 | Female | 177 | 102 | 132 | 90 | No        | Following  | Regular Exercise | No          |
| 55 | Female | 166 | 84  | 128 | 76 | Not Known | Occasional | Regular Exercise | No          |
| 55 | Female | 160 | 67  | 108 | 79 | Yes       | Occasional | Occasional       | Yes         |
| 55 | Male   | 164 | 88  | 102 | 85 | No        | Occasional | No Exercise      | No          |
| 56 | Male   | 170 | 94  | 121 | 90 | No        | Occasional | Regular Exercise | Yes         |
| 56 | Male   | 155 | 81  | 137 | 88 | No        | Occasional | Regular Exercise | No          |
| 57 | Female | 170 | 65  | 99  | 99 | No        | Occasional | Occasional       | No          |
| 57 | Male   | 175 | 58  | 129 | 78 | No        | Following  | Regular Exercise | Yes         |
| 57 | Female | 167 | 90  | 129 | 65 | No        | Following  | Regular Exercise | No          |
| 58 | Female | 178 | 95  | 132 | 85 | No        | Occasional | Occasional       | No          |
| 58 | Female | 178 | 91  | 123 | 81 | No        | Occasional | Occasional       | No          |
| 59 | Male   | 158 | 49  | 108 | 88 | No        | Not Follow | Regular Exercise | No          |
| 59 | Female | 180 | 105 | 99  | 66 | No        | Following  | Regular Exercise | No          |
| 59 | Male   | 168 | 88  | 114 | 69 | No        | Following  | Regular Exercise | No          |
| 59 | Male   | 161 | 70  | 117 | 92 | No        | Following  | Regular Exercise | No          |
| 60 | Male   | 164 | 67  | 120 | 77 | No        | Not Follow | Regular Exercise | No          |
| 60 | Male   | 160 | 101 | 113 | 67 | No        | Not Follow | No Exercise      | No          |
| 60 | Male   | 178 | 104 | 120 | 68 | No        | Not Follow | Regular Exercise | No          |
| 61 | Male   | 145 | 85  | 120 | 71 | No        | Following  | Occasional       | No          |
| 61 | Male   | 165 | 79  | 109 | 73 | No        | Not Follow | Regular Exercise | No          |
| 61 | Male   | 167 | 98  | 116 | 79 | No        | Occasional | Regular Exercise | Yes         |
| 62 | Male   | 174 | 83  | 120 | 80 | No        | Following  | Regular Exercise | No          |
| 62 | Female | 152 | 59  | 110 | 88 | No        | Following  | Occasional       | Yes         |
| 62 | Male   | 156 | 73  | 101 | 90 | No        | Following  | No Exercise      | No          |
| 62 | Male   | 178 | 89  | 123 | 92 | No        | Not Follow | Occasional       | Yes         |
| 62 | Male   | 161 | 81  | 130 | 95 | No        | Following  | Regular Exercise | No          |
| 62 | Male   | 178 | 79  | 131 | 90 | No        | Not Follow | No Exercise      | No          |
| 62 | Male   | 162 | 70  | 142 | 85 | No        | Occasional | Regular Exercise | Yes         |
| 62 | Female | 169 | 119 | 145 | 88 | No        | Not Follow | No Exercise      | Yes         |

|    |        |     |     |     |    |           |                            |
|----|--------|-----|-----|-----|----|-----------|----------------------------|
| 63 | Male   | 160 | 86  | 121 | 90 | No        | Not Follow Occasional No   |
| 63 | Female | 172 | 76  | 128 | 89 | Yes       | Not Follow Regular Exi No  |
| 63 | Male   | 165 | 126 | 129 | 82 | No        | Following Occasional No    |
| 63 | Female | 160 | 52  | 145 | 81 | No        | Following No Exercisi No   |
| 63 | Female | 155 | 61  | 132 | 82 | Yes       | Occasional Occasional Yes  |
| 63 | Female | 180 | 86  | 133 | 95 | No        | Occasional Regular Exi Yes |
| 63 | Female | 180 | 100 | 136 | 97 | No        | Not Follow Occasional No   |
| 63 | Female | 180 | 92  | 139 | 95 | Yes       | Following Regular Exi No   |
| 64 | Female | 161 | 97  | 102 | 91 | Yes       | Not Follow Occasional Yes  |
| 64 | Female | 164 | 60  | 121 | 78 | No        | Not Follow Occasional No   |
| 64 | Male   | 157 | 64  | 120 | 87 | Yes       | Not Follow No Exercisi No  |
| 64 | Female | 175 | 78  | 130 | 90 | Not Known | Following No Exercisi Yes  |
| 64 | Male   | 157 | 97  | 131 | 95 | No        | Following No Exercisi Yes  |
| 64 | Male   | 163 | 81  | 137 | 97 | No        | Following No Exercisi No   |
| 64 | Female | 177 | 102 | 129 | 90 | Not Known | Occasional Regular Exi Yes |
| 64 | Female | 160 | 73  | 132 | 97 | Yes       | Occasional Regular Exi Yes |
| 64 | Male   | 176 | 84  | 142 | 91 | No        | Following Occasional No    |
| 65 | Male   | 153 | 83  | 101 | 80 | Yes       | Following No Exercisi No   |
| 65 | Male   | 178 | 80  | 110 | 85 | No        | Occasional Regular Exi Yes |
| 65 | Male   | 157 | 99  | 112 | 88 | Yes       | Occasional Regular Exi No  |
| 65 | Male   | 167 | 77  | 124 | 86 | No        | Following No Exercisi Yes  |
| 65 | Female | 172 | 98  | 120 | 87 | No        | Not Follow No Exercisi No  |
| 65 | Female | 179 | 100 | 118 | 89 | No        | Occasional Regular Exi No  |
| 65 | Male   | 164 | 79  | 138 | 95 | No        | Following Occasional No    |
| 65 | Female | 174 | 88  | 140 | 97 | No        | Occasional Regular Exi No  |
| 66 | Female | 175 | 64  | 99  | 68 | No        | Following Occasional No    |
| 66 | Male   | 175 | 99  | 105 | 95 | Not Known | Occasional No Exercisi Yes |
| 66 | Female | 180 | 94  | 130 | 76 | Not Known | Occasional No Exercisi No  |
| 66 | Female | 179 | 86  | 132 | 79 | No        | Following Regular Exi No   |
| 66 | Male   | 170 | 79  | 134 | 73 | No        | Not Follow No Exercisi Yes |
| 66 | Female | 181 | 78  | 128 | 71 | Yes       | Not Follow Regular Exi No  |
| 66 | Male   | 167 | 80  | 129 | 75 | Not Known | Not Follow Occasional Yes  |
| 66 | Female | 171 | 86  | 130 | 82 | No        | Following Occasional No    |
| 66 | Male   | 167 | 68  | 145 | 80 | Not Known | Following Occasional No    |
| 67 | Male   | 155 | 66  | 118 | 85 | No        | Following No Exercisi Yes  |
| 67 | Female | 170 | 80  | 117 | 75 | No        | Following Occasional Yes   |
| 67 | Male   | 158 | 59  | 116 | 74 | Yes       | Following Regular Exi No   |
| 67 | Male   | 161 | 78  | 109 | 73 | No        | Not Follow Regular Exi No  |
| 67 | Female | 177 | 121 | 132 | 71 | No        | Not Follow Occasional Yes  |
| 68 | Female | 160 | 97  | 101 | 68 | No        | Following Regular Exi No   |
| 68 | Male   | 157 | 77  | 102 | 75 | No        | Occasional Regular Exi No  |
| 68 | Female | 165 | 65  | 110 | 71 | No        | Occasional Occasional No   |
| 68 | Female | 176 | 97  | 108 | 72 | Yes       | Not Follow No Exercisi No  |
| 68 | Male   | 167 | 58  | 121 | 85 | No        | Not Follow Regular Exi No  |
| 68 | Male   | 160 | 75  | 102 | 88 | No        | Occasional No Exercisi No  |
| 68 | Male   | 157 | 62  | 101 | 95 | Not Known | Occasional No Exercisi Yes |
| 68 | Male   | 158 | 87  | 101 | 92 | Not Known | Following Occasional Yes   |

|    |        |     |     |     |    |           |                       |            |
|----|--------|-----|-----|-----|----|-----------|-----------------------|------------|
| 68 | Female | 177 | 78  | 121 | 97 | No        | Not Follow Regular Ex | No         |
| 68 | Female | 180 | 105 | 101 | 97 | Not Known | Following Regular Ex  | Yes        |
| 68 | Female | 166 | 81  | 108 | 81 | No        | Occasional Occasional | Yes        |
| 45 | Male   | 157 | 56  | 112 | 91 | Yes       | Not Follow No Exercis | No         |
| 48 | Male   | 140 | 65  | 102 | 89 | Yes       | Not Follow Regular Ex | Yes        |
| 47 | Male   | 155 | 62  | 120 | 82 | No        | Not Follow No Exercis | Yes        |
| 46 | Male   | 145 | 69  | 119 | 81 | Yes       | Not Follow Regular Ex | Yes        |
| 61 | Male   | 148 | 81  | 142 | 95 | Yes       | Following No Exercis  | No         |
| 56 | Female | 153 | 83  | 130 | 74 | Yes       | Following Occasional  | Yes        |
| 66 | Female | 154 | 83  | 132 | 92 | Yes       | Following Regular Ex  | Yes        |
| 52 | Female | 165 | 84  | 96  | 83 | Yes       | Following Regular Ex  | No         |
| 62 | Female | 177 | 77  | 120 | 88 | Yes       | Following No Exercis  | Yes        |
| 58 | Male   | 178 | 78  | 115 | 95 | No        | Not Follow No Exercis | Yes        |
| 39 | Male   | 179 | 77  | 135 | 92 | Yes       | Not Follow No Exercis | No         |
| 59 | Female | 139 | 71  | 98  | 80 | Yes       | Following Regular Ex  | Yes        |
| 64 | Male   | 165 | 77  | 121 | 78 | No        | Not Follow Regular Ex | No         |
| 51 | Female | 167 | 75  | 131 | 89 | Yes       | Following No Exercis  | Yes        |
| 66 | Male   | 156 | 73  | 101 | 81 | No        | Not Follow Regular Ex | Yes        |
| 43 | Female | 145 | 83  | 152 | 78 | Yes       | Occasional Regular Ex | Yes        |
| 42 | Female | 165 | 80  | 128 | 88 | No        | Occasional Occasional | Yes        |
| 59 | Male   | 155 | 90  | 121 | 94 | Yes       | Not Follow No Exercis | Yes        |
| 58 | Male   | 150 | 88  | 105 | 94 | No        | Not Follow No Exercis | Yes        |
| 37 | Female | 145 | 81  | 135 | 80 | Yes       | Not Follow No Exercis | During Pre |
| 54 | Male   | 148 | 82  | 134 | 84 | Yes       | Following Regular Ex  | Yes        |
| 57 | Female | 152 | 76  | 145 | 71 | Yes       | Not Follow Occasional | Yes        |
| 47 | Male   | 156 | 65  | 145 | 78 | Yes       | Not Follow Regular Ex | Yes        |
| 44 | Male   | 178 | 73  | 145 | 75 | No        | Not Follow Regular Ex | Yes        |
| 48 | Male   | 177 | 83  | 152 | 77 | Yes       | Not Follow No Exercis | No         |
| 65 | Male   | 177 | 79  | 102 | 95 | No        | Occasional No Exercis | Yes        |
| 35 | Male   | 145 | 78  | 101 | 71 | Yes       | Occasional Regular Ex | No         |
| 41 | Female | 156 | 69  | 109 | 88 | Yes       | Occasional Occasional | Yes        |
| 58 | Male   | 174 | 63  | 123 | 68 | Yes       | Occasional Regular Ex | No         |
| 62 | Male   | 176 | 58  | 120 | 69 | No        | Not Follow Occasional | Yes        |
| 65 | Female | 165 | 63  | 111 | 68 | No        | Not Follow Regular Ex | Yes        |
| 34 | Female | 153 | 67  | 108 | 73 | Yes       | Following Occasional  | Yes        |
| 49 | Male   | 155 | 79  | 110 | 88 | Yes       | Not Follow Regular Ex | Yes        |
| 60 | Male   | 157 | 54  | 110 | 78 | Yes       | Not Follow No Exercis | No         |
| 43 | Female | 157 | 59  | 142 | 66 | No        | Not Follow No Exercis | Yes        |
| 55 | Female | 158 | 61  | 98  | 87 | Yes       | Not Follow Regular Ex | No         |
| 58 | Female | 161 | 89  | 121 | 78 | No        | Not Follow No Exercis | No         |
| 44 | Male   | 166 | 90  | 107 | 80 | No        | Following Occasional  | Yes        |
| 41 | Female | 143 | 67  | 125 | 82 | Yes       | Not Follow No Exercis | Yes        |
| 54 | Male   | 149 | 62  | 134 | 88 | Yes       | Following Occasional  | No         |
| 57 | Male   | 154 | 71  | 129 | 74 | Yes       | Not Follow No Exercis | No         |
| 60 | Female | 151 | 72  | 145 | 83 | Yes       | Occasional Regular Ex | Yes        |
| 59 | Male   | 169 | 66  | 128 | 92 | Yes       | Occasional Occasional | No         |
| 48 | Male   | 177 | 79  | 132 | 80 | Yes       | Not Follow No Exercis | Yes        |

|    |        |     |    |     |    |     |                                  |     |
|----|--------|-----|----|-----|----|-----|----------------------------------|-----|
| 34 | Female | 159 | 91 | 99  | 94 | Yes | Not Follow Regular Ex            | Yes |
| 44 | Female | 174 | 88 | 120 | 88 | Yes | Not Follow Occasional During Pre |     |
| 62 | Female | 173 | 69 | 148 | 82 | Yes | Not Follow Regular Ex            | Yes |
| 41 | Female | 154 | 85 | 139 | 84 | Yes | Not Follow No Exercis            | Yes |
| 56 | Female | 157 | 76 | 118 | 81 | Yes | Not Follow Regular Ex            | Yes |
| 41 | Female | 159 | 71 | 105 | 88 | No  | Not Follow Regular Ex            | Yes |
| 50 | Female | 140 | 72 | 121 | 94 | Yes | Not Follow Occasional            | Yes |
| 38 | Female | 152 | 77 | 149 | 75 | No  | Not Follow No Exercis            | Yes |
| 44 | Male   | 155 | 66 | 114 | 73 | Yes | Not Follow Regular Ex            | Yes |
| 71 | Male   | 153 | 65 | 110 | 85 | Yes | Not Follow Occasional            | Yes |
| 65 | Female | 154 | 68 | 104 | 71 | No  | Not Follow No Exercis            | Yes |
| 67 | Male   | 165 | 69 | 119 | 92 | Yes | Not Follow No Exercis            | No  |
| 41 | Male   | 178 | 77 | 117 | 89 | No  | Not Follow Regular Ex            | No  |
| 44 | Male   | 138 | 74 | 138 | 66 | No  | Not Follow Regular Ex            | Yes |
| 53 | Female | 165 | 55 | 101 | 77 | Yes | Not Follow Occasional            | Yes |
| 61 | Male   | 167 | 54 | 117 | 90 | Yes | Not Follow Regular Ex            | Yes |
| 59 | Male   | 156 | 50 | 123 | 90 | Yes | Not Follow No Exercis            | Yes |
| 65 | Female | 155 | 51 | 135 | 84 | Yes | Not Follow Occasional            | Yes |
| 45 | Male   | 178 | 52 | 107 | 82 | Yes | Following Regular Ex             | No  |
| 51 | Female | 178 | 83 | 101 | 72 | No  | Not Follow No Exercis            | Yes |
| 43 | Female | 179 | 67 | 117 | 77 | Yes | Not Follow Regular Ex            | Yes |
| 49 | Female | 145 | 66 | 123 | 78 | No  | Occasional No Exercis            | No  |
| 56 | Female | 165 | 58 | 101 | 87 | Yes | Occasional Regular Ex            | Yes |
| 42 | Male   | 152 | 67 | 123 | 90 | No  | Occasional No Exercis            | Yes |
| 41 | Male   | 150 | 58 | 148 | 76 | Yes | Occasional Regular Ex            | Yes |
| 58 | Male   | 148 | 79 | 142 | 88 | No  | Occasional No Exercis            | No  |
| 42 | Male   | 152 | 92 | 104 | 95 | No  | Occasional No Exercis            | Yes |
| 59 | Male   | 157 | 54 | 105 | 99 | Yes | Occasional Regular Ex            | Yes |
| 52 | Male   | 178 | 59 | 121 | 78 | No  | Occasional Regular Ex            | No  |
| 35 | Male   | 177 | 61 | 149 | 65 | No  | Not Follow Regular Ex            | Yes |
| 57 | Female | 177 | 90 | 101 | 88 | Yes | Occasional No Exercis            | Yes |
| 41 | Male   | 176 | 64 | 100 | 71 | No  | Not Follow Regular Ex            | Yes |
| 46 | Male   | 179 | 67 | 120 | 92 | Yes | Not Follow Regular Ex            | Yes |
| 45 | Male   | 174 | 62 | 121 | 81 | Yes | Not Follow Regular Ex            | Yes |
| 58 | Male   | 165 | 88 | 111 | 75 | No  | Following No Exercis             | No  |
| 66 | Male   | 177 | 54 | 101 | 90 | Yes | Occasional Regular Ex            | No  |
| 63 | Female | 179 | 56 | 110 | 65 | No  | Following Regular Ex             | Yes |
| 64 | Male   | 177 | 67 | 132 | 80 | Yes | Not Follow Regular Ex            | Yes |
| 64 | Male   | 176 | 65 | 132 | 85 | No  | Not Follow No Exercis            | No  |
| 41 | Male   | 177 | 68 | 123 | 85 | Yes | Not Follow Regular Ex            | Yes |
| 46 | Female | 178 | 69 | 129 | 75 | Yes | Occasional Regular Ex            | Yes |
| 57 | Male   | 179 | 73 | 118 | 76 | Yes | Not Follow No Exercis            | No  |
| 48 | Male   | 174 | 77 | 142 | 88 | Yes | Occasional Regular Ex            | Yes |
| 55 | Male   | 167 | 79 | 131 | 77 | Yes | Not Follow No Exercis            | No  |
| 44 | Male   | 168 | 61 | 95  | 68 | No  | Following Regular Ex             | Yes |
| 55 | Male   | 156 | 55 | 131 | 69 | Yes | Not Follow No Exercis            | Yes |
| 65 | Female | 173 | 55 | 102 | 95 | No  | Not Follow No Exercis            | Yes |

|    |        |     |    |     |    |     |                            |
|----|--------|-----|----|-----|----|-----|----------------------------|
| 51 | Female | 156 | 52 | 128 | 92 | Yes | Not Follow Regular Exi Yes |
|----|--------|-----|----|-----|----|-----|----------------------------|

|                        |                         |    |
|------------------------|-------------------------|----|
| Occasional Moderate    | Occasional Poor         | No |
| Non Alcoholic Low      | Occasional Poor         | No |
| Occasional Moderate    | Occasional Middle Class | No |
| Occasional Low         | Occasional Middle Class | No |
| Alcoholic Moderate     | Non Smoker Middle Class | No |
| Occasional Moderate    | Regular Middle Class    | No |
| Alcoholic Moderate     | Occasional High Class   | No |
| Alcoholic High         | Occasional High Class   | No |
| Alcoholic High         | Occasional High Class   | No |
| Alcoholic High         | Regular Middle Class    | No |
| Non Alcoholic Low      | Non Smoker High Class   | No |
| Non Alcoholic High     | Occasional High Class   | No |
| Alcoholic Moderate     | Occasional High Class   | No |
| Alcoholic Moderate     | Regular High Class      | No |
| Non Alcoholic Low      | Non Smoker Poor         | No |
| Non Alcoholic High     | Regular High Class      | No |
| Occasional High        | Regular High Class      | No |
| Occasional Low         | Occasional Middle Class | No |
| Non Alcoholic High     | Regular High Class      | No |
| Occasional Moderate    | Occasional Middle Class | No |
| Occasional Moderate    | Occasional Middle Class | No |
| Non Alcoholic High     | Regular High Class      | No |
| Non Alcoholic Moderate | Regular Poor            | No |
| Alcoholic High         | Regular High Class      | No |
| Non Alcoholic Moderate | Non Smoker High Class   | No |
| Alcoholic Low          | Occasional Poor         | No |
| Occasional Moderate    | Occasional Poor         | No |
| Alcoholic High         | Regular Poor            | No |
| Occasional High        | Regular Poor            | No |
| Occasional Moderate    | Regular Middle Class    | No |
| Non Alcoholic Moderate | Non Smoker Middle Class | No |
| Alcoholic Moderate     | Regular High Class      | No |
| Occasional High        | Regular Poor            | No |
| Non Alcoholic High     | Occasional Middle Class | No |
| Occasional High        | Occasional Poor         | No |
| Non Alcoholic Low      | Non Smoker Middle Class | No |
| Occasional Moderate    | Occasional High Class   | No |
| Non Alcoholic Moderate | Regular Poor            | No |
| Non Alcoholic Low      | Non Smoker Poor         | No |
| Non Alcoholic Moderate | Non Smoker Middle Class | No |
| Non Alcoholic High     | Regular High Class      | No |
| Non Alcoholic Moderate | Occasional Middle Class | No |
| Non Alcoholic Moderate | Occasional Poor         | No |
| Non Alcoholic Moderate | Non Smoker Middle Class | No |
| Occasional Low         | Occasional Poor         | No |
| Occasional High        | Occasional Middle Class | No |
| Alcoholic Moderate     | Non Smoker Poor         | No |

|                        |             |              |    |
|------------------------|-------------|--------------|----|
| Non Alcoholic Moderate | Regular     | Poor         | No |
| Non Alcoholic High     | Regular     | High Class   | No |
| Alcoholic High         | Regular     | High Class   | No |
| Non Alcoholic Moderate | Non Smoking | High Class   | No |
| Occasional Moderate    | Occasional  | Middle Class | No |
| Occasional High        | Regular     | Poor         | No |
| Non Alcoholic Low      | Non Smoking | High Class   | No |
| Occasional Low         | Occasional  | High Class   | No |
| Alcoholic Low          | Non Smoking | High Class   | No |
| Non Alcoholic Low      | Non Smoking | Middle Class | No |
| Alcoholic High         | Regular     | Middle Class | No |
| Non Alcoholic Moderate | Non Smoking | High Class   | No |
| Alcoholic High         | Regular     | Poor         | No |
| Non Alcoholic Low      | Non Smoking | High Class   | No |
| Occasional Moderate    | Occasional  | High Class   | No |
| Non Alcoholic Low      | Non Smoking | Middle Class | No |
| Occasional Moderate    | Occasional  | Poor         | No |
| Non Alcoholic Low      | Non Smoking | Poor         | No |
| Alcoholic High         | Regular     | Middle Class | No |
| Occasional Moderate    | Regular     | Middle Class | No |
| Non Alcoholic High     | Non Smoking | Middle Class | No |
| Alcoholic High         | Regular     | Poor         | No |
| Occasional High        | Non Smoking | Poor         | No |
| Occasional Moderate    | Non Smoking | High Class   | No |
| Occasional High        | Regular     | High Class   | No |
| Alcoholic High         | Regular     | Middle Class | No |
| Non Alcoholic Low      | Non Smoking | Middle Class | No |
| Occasional High        | Regular     | Middle Class | No |
| Non Alcoholic High     | Occasional  | Middle Class | No |
| Occasional Moderate    | Occasional  | Poor         | No |
| Non Alcoholic High     | Occasional  | Poor         | No |
| Alcoholic Moderate     | Occasional  | Middle Class | No |
| Non Alcoholic Low      | Non Smoking | Middle Class | No |
| Non Alcoholic Low      | Occasional  | Poor         | No |
| Occasional Moderate    | Regular     | High Class   | No |
| Non Alcoholic Moderate | Occasional  | Poor         | No |
| Non Alcoholic High     | Non Smoking | Poor         | No |
| Occasional High        | Regular     | Poor         | No |
| Occasional Moderate    | Occasional  | Poor         | No |
| Alcoholic Moderate     | Occasional  | High Class   | No |
| Non Alcoholic Moderate | Regular     | Middle Class | No |
| Non Alcoholic Moderate | Regular     | High Class   | No |
| Non Alcoholic Low      | Non Smoking | Poor         | No |
| Occasional Low         | Non Smoking | High Class   | No |
| Alcoholic High         | Occasional  | Poor         | No |
| Alcoholic Moderate     | Occasional  | Middle Class | No |
| Non Alcoholic Low      | Regular     | Poor         | No |



|                        |                          |    |
|------------------------|--------------------------|----|
| Non Alcoholic Moderate | Occasional Middle Class  | No |
| Non Alcoholic Low      | Non Smoking Middle Class | No |
| Alcoholic High         | Regular High Class       | No |
| Alcoholic Low          | Non Smoking Middle Class | No |
| Non Alcoholic High     | Regular High Class       | No |
| Non Alcoholic Low      | Non Smoking Poor         | No |
| Occasional Low         | Non Smoking High Class   | No |
| Non Alcoholic Low      | Occasional High Class    | No |
| Alcoholic High         | Regular High Class       | No |
| Alcoholic Low          | Regular Poor             | No |
| Non Alcoholic Low      | Non Smoking High Class   | No |
| Occasional Low         | Non Smoking Poor         | No |
| Alcoholic Low          | Non Smoking Poor         | No |
| Occasional High        | Occasional High Class    | No |
| Non Alcoholic Moderate | Non Smoking Poor         | No |
| Alcoholic Low          | Non Smoking Poor         | No |
| Alcoholic Low          | Non Smoking Middle Class | No |
| Alcoholic Low          | Regular High Class       | No |
| Alcoholic Low          | Non Smoking Middle Class | No |
| Occasional Low         | Regular Poor             | No |
| Occasional Low         | Regular Poor             | No |
| Alcoholic Low          | Regular High Class       | No |
| Non Alcoholic Moderate | Occasional High Class    | No |
| Occasional Low         | Non Smoking High Class   | No |
| Alcoholic Low          | Occasional High Class    | No |
| Non Alcoholic Moderate | Non Smoking Poor         | No |
| Occasional High        | Non Smoking Poor         | No |
| Non Alcoholic Moderate | Regular High Class       | No |
| Non Alcoholic Low      | Occasional High Class    | No |
| Alcoholic Low          | Non Smoking High Class   | No |
| Alcoholic Low          | Occasional High Class    | No |
| Alcoholic Low          | Occasional Poor          | No |
| Alcoholic Low          | Occasional Poor          | No |
| Non Alcoholic Low      | Occasional High Class    | No |
| Non Alcoholic Low      | Regular Poor             | No |
| Non Alcoholic Low      | Occasional High Class    | No |
| Alcoholic Low          | Non Smoking Poor         | No |
| Non Alcoholic Low      | Non Smoking High Class   | No |
| Occasional Moderate    | Regular Poor             | No |
| Alcoholic Low          | Occasional Poor          | No |
| Alcoholic Moderate     | Regular Middle Class     | No |
| Non Alcoholic Low      | Regular Middle Class     | No |
| Occasional Low         | Occasional Poor          | No |
| Non Alcoholic Low      | Occasional High Class    | No |
| Alcoholic Low          | Regular Middle Class     | No |
| Occasional Low         | Regular High Class       | No |
| Occasional Low         | Occasional Poor          | No |

|                        |                          |    |
|------------------------|--------------------------|----|
| Non Alcoholic Low      | Occasional Poor          | No |
| Non Alcoholic Moderate | Non Smoking Poor         | No |
| Occasional High        | Non Smoking Middle Class | No |
| Non Alcoholic Moderate | Regular High Class       | No |
| Occasional High        | Regular Poor             | No |
| Non Alcoholic Low      | Occasional Middle Class  | No |
| Alcoholic Moderate     | Non Smoking Poor         | No |
| Alcoholic Low          | Occasional High Class    | No |
| Non Alcoholic Moderate | Non Smoking Middle Class | No |
| Alcoholic Low          | Non Smoking High Class   | No |
| Non Alcoholic Low      | Regular Poor             | No |
| Alcoholic Low          | Regular High Class       | No |
| Occasional Moderate    | Occasional High Class    | No |
| Non Alcoholic High     | Occasional High Class    | No |
| Non Alcoholic Low      | Occasional High Class    | No |
| Alcoholic Moderate     | Occasional High Class    | No |
| Non Alcoholic Low      | Regular High Class       | No |
| Non Alcoholic Low      | Non Smoking Poor         | No |
| Non Alcoholic Low      | Non Smoking Poor         | No |
| Occasional Low         | Non Smoking High Class   | No |
| Occasional Low         | Non Smoking Poor         | No |
| Alcoholic Low          | Non Smoking Poor         | No |
| Alcoholic Low          | Non Smoking High Class   | No |
| Occasional Low         | Non Smoking Middle Class | No |
| Occasional Low         | Non Smoking High Class   | No |
| Non Alcoholic Low      | Non Smoking Poor         | No |
| Occasional Low         | Non Smoking Middle Class | No |
| Occasional Low         | Non Smoking High Class   | No |
| Alcoholic Low          | Non Smoking High Class   | No |
| Alcoholic Moderate     | Occasional Poor          | No |
| Alcoholic Low          | Non Smoking High Class   | No |
| Occasional Low         | Non Smoking High Class   | No |
| Alcoholic High         | Non Smoking High Class   | No |
| Non Alcoholic Low      | Non Smoking High Class   | No |
| Non Alcoholic Low      | Regular High Class       | No |
| Non Alcoholic Low      | Non Smoking Middle Class | No |
| Occasional Low         | Non Smoking Middle Class | No |
| Occasional Low         | Non Smoking Middle Class | No |
| Occasional Moderate    | Non Smoking Middle Class | No |
| Alcoholic Low          | Occasional Poor          | No |
| Alcoholic Low          | Occasional Poor          | No |
| Non Alcoholic Low      | Occasional Poor          | No |
| Non Alcoholic Low      | Regular High Class       | No |
| Occasional High        | Occasional Poor          | No |
| Occasional Low         | Occasional High Class    | No |
| Alcoholic Moderate     | Non Smoking Poor         | No |
| Occasional High        | Non Smoking Middle Class | No |

|                     |                         |    |
|---------------------|-------------------------|----|
| Non Alcoholic Low   | Non Smoker Middle Class | No |
| Occasional Moderate | Occasional Middle Class | No |
| Non Alcoholic Low   | Regular High Class      | No |
| Occasional High     | Regular High Class      | No |
| Non Alcoholic Low   | Regular Poor            | No |
| Non Alcoholic Low   | Occasional Middle Class | No |
| Non Alcoholic Low   | Regular Poor            | No |
| Occasional High     | Regular Poor            | No |
| Non Alcoholic High  | Occasional Middle Class | No |
| Non Alcoholic High  | Regular Poor            | No |
| Non Alcoholic High  | Regular High Class      | No |
| Non Alcoholic High  | Regular High Class      | No |
| Non Alcoholic High  | Non Smoker Middle Class | No |
| Occasional High     | Regular Middle Class    | No |
| Non Alcoholic High  | Regular Middle Class    | No |
| Non Alcoholic High  | Regular Middle Class    | No |
| Non Alcoholic High  | Regular Middle Class    | No |
| Non Alcoholic Low   | Occasional High Class   | No |
| Non Alcoholic High  | Occasional Middle Class | No |
| Non Alcoholic High  | Regular Middle Class    | No |
| Occasional High     | Occasional Poor         | No |
| Non Alcoholic Low   | Regular Middle Class    | No |
| Non Alcoholic High  | Regular High Class      | No |
| Occasional High     | Regular High Class      | No |
| Non Alcoholic High  | Regular Middle Class    | No |
| Non Alcoholic Low   | Regular Middle Class    | No |
| Non Alcoholic Low   | Regular Middle Class    | No |
| Occasional Low      | Occasional Poor         | No |
| Occasional Low      | Regular High Class      | No |
| Non Alcoholic Low   | Occasional High Class   | No |
| Alcoholic High      | Regular High Class      | No |
| Occasional High     | Regular High Class      | No |
| Non Alcoholic High  | Occasional Poor         | No |
| Non Alcoholic High  | Regular Middle Class    | No |
| Non Alcoholic High  | Occasional Middle Class | No |
| Non Alcoholic High  | Occasional High Class   | No |
| Non Alcoholic Low   | Regular Poor            | No |
| Non Alcoholic High  | Regular Middle Class    | No |
| Non Alcoholic High  | Regular Middle Class    | No |
| Non Alcoholic High  | Occasional Middle Class | No |
| Alcoholic High      | Regular High Class      | No |
| Non Alcoholic High  | Regular High Class      | No |
| Occasional High     | Occasional High Class   | No |
| Non Alcoholic Low   | Regular Poor            | No |
| Non Alcoholic Low   | Occasional Middle Class | No |
| Non Alcoholic High  | Regular Poor            | No |
| Occasional High     | Occasional Poor         | No |

|                        |                       |    |
|------------------------|-----------------------|----|
| Non Alcoholic High     | Non Smoker Poor       | No |
| Non Alcoholic High     | Occasional High Class | No |
| Non Alcoholic Low      | Regular High Class    | No |
| Non Alcoholic High     | Occasional Poor       | No |
| Non Alcoholic Low      | Regular Middle Class  | No |
| Non Alcoholic High     | Regular Middle Class  | No |
| Occasional High        | Regular High Class    | No |
| Non Alcoholic High     | Regular Poor          | No |
| Non Alcoholic High     | Occasional High Class | No |
| Non Alcoholic High     | Occasional Poor       | No |
| Non Alcoholic High     | Regular Poor          | No |
| Non Alcoholic Low      | Regular Poor          | No |
| Occasional Low         | Regular High Class    | No |
| Non Alcoholic High     | Regular High Class    | No |
| Occasional High        | Occasional High Class | No |
| Non Alcoholic High     | Regular Poor          | No |
| Non Alcoholic High     | Regular Middle Class  | No |
| Non Alcoholic Low      | Regular High Class    | No |
| Occasional Low         | Occasional High Class | No |
| Non Alcoholic Moderate | Occasional Poor       | No |
| Non Alcoholic High     | Regular Middle Class  | No |
| Occasional Moderate    | Regular High Class    | No |
| Non Alcoholic High     | Occasional Poor       | No |
| Non Alcoholic High     | Regular High Class    | No |
| Non Alcoholic High     | Regular High Class    | No |
| Non Alcoholic High     | Occasional High Class | No |
| Non Alcoholic Moderate | Regular Poor          | No |
| Non Alcoholic High     | Occasional Poor       | No |
| Alcoholic Moderate     | Regular High Class    | No |
| Non Alcoholic Moderate | Regular Poor          | No |
| Non Alcoholic High     | Occasional Poor       | No |
| Non Alcoholic High     | Regular Poor          | No |
| Non Alcoholic High     | Regular High Class    | No |
| Non Alcoholic High     | Regular Poor          | No |
| Non Alcoholic Moderate | Regular Poor          | No |
| Occasional Moderate    | Regular Middle Class  | No |
| Non Alcoholic High     | Regular Middle Class  | No |
| Non Alcoholic High     | Regular High Class    | No |
| Non Alcoholic High     | Occasional Poor       | No |
| Non Alcoholic High     | Regular High Class    | No |
| Non Alcoholic High     | Occasional High Class | No |
| Non Alcoholic High     | Regular Middle Class  | No |
| Non Alcoholic Moderate | Regular High Class    | No |
| Non Alcoholic High     | Occasional High Class | No |
| Non Alcoholic High     | Regular High Class    | No |
| Non Alcoholic Moderate | Regular Middle Class  | No |
| Non Alcoholic High     | Regular Poor          | No |

Non Alcoholic

Regular

High Class

No
